# Supplementary material
Source: ML conference proceedings conference paper supplement (https://openreview.net/forum?id=tfyr2zRVoK)
Supplement: supplementary_material [file 1_DemographicProfile_gt1.xlsx]

## Sheet: Sheet2
Demographic Profile
Row Labels	Count of Sex
Female	17
Male	23
Grand Total	40
Row Labels	Count of Civil Status
Married	11
Single	12
Widow	17
Grand Total	40
Row Labels	Count of Highest Educational Attainment
Elementary	13
Junior High School	15
Senior High School	12
Grand Total	40

## Sheet: Sheet1
Respondents	Sex	Civil Status	Highest Educational Attainment
1	Female	Single	Senior High School
2	Male	Single	Elementary
3	Male	Widow	Senior High School
4	Male	Widow	Elementary
5	Male	Widow	Junior High School
6	Female	Single	Senior High School
7	Female	Widow	Elementary
8	Male	Widow	Elementary
9	Male	Single	Senior High School
10	Male	Widow	Senior High School
11	Female	Single	Elementary
12	Female	Married	Junior High School
13	Female	Widow	Senior High School
14	Male	Married	Elementary
15	Male	Widow	Junior High School
16	Male	Widow	Elementary
17	Male	Widow	Senior High School
18	Female	Widow	Senior High School
19	Female	Single	Junior High School
20	Female	Single	Junior High School
21	Male	Married	Junior High School
22	Male	Single	Senior High School
23	Female	Married	Elementary
24	Male	Married	Elementary
25	Male	Widow	Junior High School
26	Female	Married	Junior High School
27	Male	Single	Junior High School
28	Female	Married	Junior High School
29	Female	Widow	Junior High School
30	Female	Widow	Junior High School
31	Male	Married	Junior High School
32	Female	Widow	Senior High School
33	Female	Widow	Senior High School
34	Male	Widow	Elementary
35	Male	Single	Senior High School
36	Male	Married	Junior High School
37	Female	Single	Elementary
38	Male	Married	Elementary
39	Male	Married	Junior High School
40	Male	Single	Elementary
