# Supplementary material
Source: ML conference proceedings conference paper supplement (https://openreview.net/forum?id=tfyr2zRVoK)
Supplement: supplementary_material [file 1_EntireShippingCosts_gt1.xlsx]

## Sheet: Sheet1
Customers	Seattle	Milwaukee	Birmingham	Oakland	Min Distance	Shipping Center	Total Shipping Charge
Chandler	1447	1830	1686	766	766	Oakland	2681
Glendale	1405	1870	1715	744	744	Oakland	2604
Mesa	1440	1816	1702	758	758	Oakland	2653
Scottsdale	1435	1818	1706	754	754	Oakland	2639
Little Rock	2277	743	373	1955	373	Birmingham	1305.5
Antioch	796	2146	2299	36	36	Oakland	126
Berkeley	795	2165	2319	4	4	Oakland	80
Chula Vista	1258	2124	1996	499	499	Oakland	1746.5
Concord	785	2155	2319	25	25	Oakland	87.5
Daly City	813	2183	2329	21	21	Oakland	80
Fairfield	759	2129	2339	41	41	Oakland	143.5
Hayward	816	2186	2306	20	20	Oakland	80
Huntington Beach	1162	2063	2034	404	404	Oakland	1414
Long Beach	1156	2071	2042	398	398	Oakland	1393
Modesto	822	2158	2248	82	82	Oakland	287
Santa Clara	834	2204	2290	44	44	Oakland	154
Sunnyvale	835	2205	2293	44	44	Oakland	154
Thousand Oaks	1143	2092	2062	385	385	Oakland	1347.5
Vallejo	773	2143	2328	25	25	Oakland	87.5
Aurora	1332	1045	1318	1260	1045	Milwaukee	3657.5
Colorado Springs	1388	1114	1312	1316	1114	Milwaukee	3899
Denver	1318	1043	1328	1246	1043	Milwaukee	3650.5
Chicago	2067	93	663	2124	93	Milwaukee	325.5
Joliet	2052	126	671	2099	126	Milwaukee	441
Evansville	2254	387	343	2214	343	Birmingham	1200.5
Fort Wayne	2233	262	597	2269	262	Milwaukee	917
Cedar Rapids	1832	244	782	1919	244	Milwaukee	854
Kansas City	1842	576	695	1802	576	Milwaukee	2016
Topeka	1848	630	748	1776	630	Milwaukee	2205
Lexington-Fayette	2406	468	411	2383	411	Birmingham	1438.5
Louisville-Jefferson County5	2340	401	363	2317	363	Birmingham	1270.5
New Orleans	2617	1016	344	2265	344	Birmingham	1204
Baltimore	2771	800	781	2808	781	Birmingham	2733.5
Ann Arbor	2314	343	710	2351	343	Milwaukee	1200.5
Detroit	2352	381	722	2389	381	Milwaukee	1333.5
St. Paul	1668	332	1069	1970	332	Milwaukee	1162
Kansas City	1840	569	688	1800	569	Milwaukee	1991.5
St. Louis	2089	375	500	2050	375	Milwaukee	1312.5
Omaha	1659	508	869	1661	508	Milwaukee	1778
Henderson	1145	1806	1799	568	568	Oakland	1988
Reno	738	1964	2267	256	256	Oakland	896
Manchester	3087	1116	1214	3124	1116	Milwaukee	3906
Elizabeth	2857	886	950	2894	886	Milwaukee	3101
Jersey City	2860	889	959	2896	889	Milwaukee	3111.5
Newark	2852	881	952	2889	881	Milwaukee	3083.5
New York	2863	892	964	2900	892	Milwaukee	3122
Yonkers	2873	902	980	2910	902	Milwaukee	3157
Cary	2876	905	543	2829	543	Birmingham	1900.5
Durham	2856	885	531	2808	531	Birmingham	1858.5
Cincinnati	2327	389	468	2374	389	Milwaukee	1361.5
Cleveland	2417	446	712	2453	446	Milwaukee	1561
Norman	2007	892	705	1639	705	Birmingham	2467.5
Tulsa	2000	773	639	1718	639	Birmingham	2236.5
Eugene	278	2173	2494	523	278	Seattle	973
Portland	168	2065	2480	629	168	Seattle	588
Philadelphia	2832	861	878	2869	861	Milwaukee	3013.5
Pittsburgh	2535	564	753	2572	564	Milwaukee	1974
Providence	3046	1075	1153	3083	1075	Milwaukee	3762.5
Columbia	2835	903	362	2678	362	Birmingham	1267
Sioux Falls	1478	497	1053	1727	497	Milwaukee	1739.5
Clarksville	2359	561	232	2294	232	Birmingham	812
Killeen	2091	1156	741	1744	741	Birmingham	2593.5
Laredo	2219	1432	978	1780	978	Birmingham	3423
Mesquite	2123	1052	629	1734	629	Birmingham	2201.5
Alexandria	2781	811	746	2818	746	Birmingham	2611
Hampton	2945	974	716	2950	716	Birmingham	2506
Seattle	0	1995	2525	796	0	Seattle	80
Spokane	282	1714	2244	864	282	Seattle	987
Green Bay	1934	121	878	2224	121	Milwaukee	423.5
Madison	1927	74	811	2091	74	Milwaukee	259
