# Supplementary material
Source: ML conference proceedings conference paper supplement (https://openreview.net/forum?id=tfyr2zRVoK)
Supplement: supplementary_material [file 1_FutureValue_gt1.xlsx]

## Sheet: Sheet1
No.	Present Value	Years	Annual Interest Rate	# Compound Periods	Future Value
1	3150	6	0.18	1	8503.6
2	8453	19	0.06	1	25575.4
3	89305	13	0.11	1	346796
4	227382	29	0.05	1	935935
