# Supplementary material
Source: ML conference proceedings conference paper supplement (https://openreview.net/forum?id=tfyr2zRVoK)
Supplement: supplementary_material [file 1_IncomeStatement2_gt1.xlsx]

## Sheet: Sheet1
Year	Sales	Sales Return	Discounts and Allowances	Net Sales	Materials Charges	Labor Charges	Overhead	Total Cost of Goods Sold	Gross Profit
2015	78000	3000	1000	74000	8000	9000	2000	19000	55000
2016	73423	3884	1279	68260	9613	9085	1900	20598	47662
2017	78842	4234	1017	73591	10765	7395	1980	20140	53451
2018	86241	4413	1377	80451	9736	7997	1899	19632	60819
2019	85548	4073	898	80577	7962	7939	1812	17713	62864
2020	82394	4152	1827	76415	9222	7536	1733	18491	57924
2021	82316	3492	911	77913	9511	7159	1609	18279	59634
2022	73296	3659	1755	67882	9740	5807	1483	17030	50852
2023	68844	4387	1830	62627	9767	7578	1633	18978	43649
