# Supplementary material
Source: ML conference proceedings conference paper supplement (https://openreview.net/forum?id=tfyr2zRVoK)
Supplement: supplementary_material [file 1_PeriodRate_gt1.xlsx]

## Sheet: Sheet1
Annual Rate (%)	Period per year	Period Rate (%)
11.25	2	5.625
7.776	6	1.296
15.496	6	2.58267
9.32	2	4.66
18.584	6	3.09733
18.198	8	2.27475
17.812	5	3.5624
14.724	2	7.362
16.268	7	2.324
13.566	8	1.69575
14.338	5	2.8676
9.706	5	1.9412
13.566	2	6.783
9.706	5	1.9412
13.566	7	1.938
7.776	7	1.11086
15.11	5	3.022
15.496	3	5.16533
14.724	1	14.724
12.794	7	1.82771
9.32	5	1.864
16.268	7	2.324
10.478	2	5.239
18.584	7	2.65486
