# Supplementary material
Source: ML conference proceedings conference paper supplement (https://openreview.net/forum?id=tfyr2zRVoK)
Supplement: supplementary_material [file 1_PresentValue_gt1.xlsx]

## Sheet: Sheet1
No.	Present Value	Years	Annual Interest Rate	# Compound Periods	Future Value
1	10823	12	0.04	1	17328
2	29194.1	4	0.09	2	41517
3	120292	16	0.12	3	790382
4	66340.4	21	0.11	4	647816
