# Supplementary material
Source: ML conference proceedings conference paper supplement (https://openreview.net/forum?id=tfyr2zRVoK)
Supplement: supplementary_material [file 1_PricingTable_gt1.xlsx]

## Sheet: Sheet1
Date	Number of Rolls	Price	Revenue
2015-09-16	540	168	90720
2015-09-15	360	168	60480
2015-09-16	12	198	2376
2015-09-15	468	168	78624
2015-09-17	48	198	9504
2015-09-18	84	198	16632
2015-09-17	540	168	90720
2015-09-18	492	168	82656
2015-09-18	204	187	38148
2015-09-15	408	168	68544
2015-09-17	780	152	118560
2015-09-16	444	168	74592
2015-09-15	432	168	72576
2015-09-16	456	168	76608
2015-09-16	768	152	116736
2015-09-17	528	168	88704
2015-09-15	624	152	94848
2015-09-17	372	168	62496
2015-09-18	588	152	89376
2015-09-15	504	168	84672
2015-09-16	504	168	84672
2015-09-18	660	152	100320
2015-09-16	468	168	78624
2015-09-18	492	168	82656
2015-09-18	204	187	38148

## Sheet: Pricing Table
Units From	Units To	Price per Roll (100 feet)
0	143	198
144	288	187
289	577	168
578	999	152
