# Supplementary material
Source: ML conference proceedings conference paper supplement (https://openreview.net/forum?id=tfyr2zRVoK)
Supplement: supplementary_material [file 1_RampUpAndDown_gt1.xlsx]

## Sheet: Sheet1
Hanging mass (kilograms)	Acceleration of Block up Ramp	Hanging mass (kilograms)	Acceleration of Block down Ramp
0.4	-2.24047	0	-5.19723
0.42	-2.03465	0.02	-4.8077
0.44	-1.83575	0.04	-4.43788
0.46	-1.64342	0.06	-4.08633
0.48	-1.45735	0.08	-3.75172
0.5	-1.27723	0.1	-3.43285
0.52	-1.10279	0.12	-3.12865
0.54	-0.933755	0.14	-2.83812
0.56	-0.769881	0.16	-2.56036
0.58	-0.610935	0.18	-2.29454
0.6	-0.456699	0.2	-2.03992
0.62	-0.306966	0.22	-1.7958
0.64	-0.161542	0.24	-1.56154
0.66	-0.0202437	0.26	-1.33656
0.68	0.117102	0.28	-1.12032
0.7	0.25066	0.3	-0.912311
0.72	0.380583	0.32	-0.71208
0.74	0.507018	0.34	-0.519198
0.76	0.630104	0.36	-0.333267
0.78	0.749972	0.38	-0.153917
0.8	0.866746	0.4	0.0191947
0.82	0.980546	0.42	0.186388
0.84	1.09148	0.44	0.347961
0.86	1.19966	0.46	0.504193
0.88	1.30519	0.48	0.655345
0.9	1.40816	0.5	0.801659
0.92	1.50866	0.52	0.943365
0.94	1.60678	0.54	1.08068
0.96	1.70261	0.56	1.2138
