# Supplementary material
Source: ML conference proceedings conference paper supplement (https://openreview.net/forum?id=tfyr2zRVoK)
Supplement: supplementary_material [file 1_SimpleCompoundInterest_gt1.xlsx]

## Sheet: Sheet1
Year	Simple Interest	Compound Interest
1	10	10
2	20	21
3	30	33.1
4	40	46.41
5	50	61.051
6	60	77.1561
7	70	94.8717
8	80	114.359
9	90	135.795
10	100	159.374
11	110	185.312
12	120	213.843
13	130	245.227
14	140	279.75
15	150	317.725
16	160	359.497
17	170	405.447
18	180	455.992
19	190	511.591
20	200	572.75
