# Supplementary material
Source: ML conference proceedings conference paper supplement (https://openreview.net/forum?id=tfyr2zRVoK)
Supplement: supplementary_material [file 1_Tax_gt1.xlsx]

## Sheet: Sheet1
Week	Sales	Total Expenses Before Tax	Profit Before Tax	Tax Expense
Week 1	169864	17641	152223	34250.2
Week 2	112663	81793	30870	6945.75
Week 3	151992	131215	20777	4674.82
Week 4	156866	130607	26259	5908.28
Week 5	108855	9203	99652	22421.7
Week 6	145067	96964	48103	10823.2
Week 7	195791	105986	89805	20206.1
Week 8	144664	72052	72612	16337.7
Week 9	169962	19366	150596	33884.1
Week 10	168508	162750	5758	1295.55
