# Supplementary material
Source: ML conference proceedings conference paper supplement (https://openreview.net/forum?id=tfyr2zRVoK)
Supplement: supplementary_material [file 2_EasyGDPBreakdown_gt1.xlsx]

## Sheet: Sheet1
Country	IndicatorName	2000	2001	2002	2003	2004	2005	2006	2007	2008	2009	2010	2011	2012	2013	GDP Difference
Afghanistan	Final consumption expenditure	4.06751e+09	3.85831e+09	5.89471e+09	7.28411e+09	7.16943e+09	8.32842e+09	8.80697e+09	9.85798e+09	1.00824e+10	1.21307e+10	1.29233e+10	1.34261e+10	1.5475e+10	1.58703e+10
Afghanistan	Household consumption expenditure (including Non-profit institutions serving households)	3.75147e+09	3.54948e+09	5.45184e+09	6.71649e+09	6.52615e+09	7.66407e+09	7.95502e+09	8.83315e+09	9.04192e+09	1.08969e+10	1.17242e+10	1.20667e+10	1.39098e+10	1.41758e+10
Afghanistan	General government final consumption expenditure	3.14642e+08	3.09011e+08	4.38313e+08	5.65376e+08	6.55199e+08	6.64355e+08	8.76891e+08	1.06461e+09	1.07987e+09	1.2783e+09	1.22716e+09	1.40756e+09	1.62042e+09	1.76599e+09
Afghanistan	Gross capital formation	6.67651e+08	7.01342e+08	9.61282e+08	1.08095e+09	1.32936e+09	1.4441e+09	1.44245e+09	1.52083e+09	1.5022e+09	1.57792e+09	1.37168e+09	1.39197e+09	1.28193e+09	1.2463e+09
Afghanistan	Gross fixed capital formation (including Acquisitions less disposals of valuables)	6.67651e+08	7.01342e+08	9.61282e+08	1.08095e+09	1.32936e+09	1.4441e+09	1.44245e+09	1.52083e+09	1.5022e+09	1.57792e+09	1.37168e+09	1.39197e+09	1.28193e+09	1.2463e+09
Afghanistan	Exports of goods and services	1.07564e+09	9.86701e+08	1.43143e+09	2.12416e+09	1.67133e+09	1.7238e+09	1.64618e+09	1.55306e+09	1.87234e+09	1.94178e+09	1.74342e+09	1.71955e+09	1.74589e+09	1.72966e+09
Afghanistan	Imports of goods and services	2.21981e+09	2.12628e+09	2.77208e+09	4.41993e+09	4.36958e+09	4.87447e+09	5.02932e+09	5.22044e+09	5.41416e+09	5.84475e+09	5.23632e+09	5.24887e+09	5.58925e+09	5.61545e+09
Afghanistan	Gross Domestic Product (GDP)	3.49525e+09	3.29687e+09	5.43974e+09	5.88735e+09	6.02524e+09	6.62183e+09	7.22847e+09	8.39173e+09	8.58751e+09	1.00667e+10	1.03925e+10	1.12947e+10	1.25292e+10	1.33362e+10	8.07021e+08
Afghanistan	Agriculture, hunting, forestry, fishing (ISIC A-B)	1.93765e+09	1.70731e+09	2.28372e+09	2.36138e+09	2.01984e+09	2.26679e+09	2.44058e+09	2.95699e+09	2.61069e+09	3.21952e+09	2.63942e+09	2.76324e+09	2.85306e+09	3.08372e+09
Afghanistan	Mining, Manufacturing, Utilities (ISIC C-E)	6.07224e+08	6.57471e+08	9.4227e+08	9.78007e+08	1.02429e+09	1.06054e+09	1.09693e+09	1.16019e+09	1.18639e+09	1.25229e+09	1.31515e+09	1.40236e+09	1.49602e+09	1.52527e+09
Afghanistan	Manufacturing (ISIC D)	5.92412e+08	6.40162e+08	9.264e+08	9.6074e+08	1.00062e+09	1.03345e+09	1.06646e+09	1.11485e+09	1.14101e+09	1.20145e+09	1.24757e+09	1.28572e+09	1.37978e+09	1.40167e+09
Afghanistan	Construction (ISIC F)	1.9574e+08	1.93735e+08	2.16559e+08	2.94769e+08	4.60375e+08	6.08854e+08	7.91511e+08	8.70667e+08	9.57689e+08	1.02218e+09	1.10062e+09	1.24683e+09	1.35724e+09	1.46535e+09
Afghanistan	Wholesale, retail trade, restaurants and hotels (ISIC G-H)	1.57515e+08	1.6348e+08	5.86411e+08	5.63445e+08	5.58603e+08	5.81599e+08	5.92866e+08	6.78133e+08	6.93435e+08	7.52105e+08	7.92015e+08	8.77283e+08	1.09664e+09	1.10257e+09
Afghanistan	Transport, storage and communication (ISIC I)	2.80227e+08	3.01901e+08	5.24279e+08	7.43672e+08	8.1882e+08	7.65498e+08	8.94744e+08	1.20622e+09	1.47035e+09	1.73518e+09	2.13603e+09	2.35165e+09	2.83695e+09	3.14344e+09
Afghanistan	Other Activities (ISIC J-P)	2.7219e+08	2.3238e+08	6.94427e+08	6.81749e+08	7.38429e+08	9.12706e+08	9.51319e+08	1.0752e+09	1.22913e+09	1.50593e+09	1.78248e+09	1.96205e+09	2.40303e+09	2.47202e+09
Afghanistan	Total Value Added	3.47964e+09	3.28214e+09	5.22804e+09	5.62049e+09	5.62011e+09	6.19599e+09	6.78583e+09	7.97785e+09	8.17278e+09	9.51524e+09	9.77567e+09	1.0614e+10	1.20312e+10	1.27987e+10
Albania	Final consumption expenditure	5.29869e+09	5.36625e+09	5.75576e+09	6.26138e+09	6.82916e+09	7.20402e+09	7.45508e+09	9.07259e+09	1.02506e+10	1.03597e+10	1.05611e+10	1.0734e+10	1.0809e+10	1.09169e+10
Albania	Household consumption expenditure (including Non-profit institutions serving households)	4.58821e+09	4.56708e+09	4.91519e+09	5.45774e+09	5.96962e+09	6.32869e+09	6.62537e+09	8.22222e+09	9.34198e+09	9.40773e+09	9.56411e+09	9.73408e+09	9.8045e+09	9.89767e+09
Albania	General government final consumption expenditure	6.95743e+08	7.6663e+08	8.09345e+08	7.94173e+08	8.52957e+08	8.75336e+08	8.46545e+08	9.06103e+08	9.83099e+08	1.01985e+09	1.0603e+09	1.06721e+09	1.07283e+09	1.08716e+09
Albania	Gross capital formation	1.79077e+09	2.23141e+09	2.33175e+09	2.75035e+09	2.82503e+09	2.96212e+09	3.34679e+09	3.52934e+09	3.66912e+09	3.71612e+09	3.43852e+09	3.65368e+09	3.35875e+09	3.25303e+09
Albania	Gross fixed capital formation (including Acquisitions less disposals of valuables)	1.69922e+09	2.11733e+09	2.21255e+09	2.60974e+09	2.68061e+09	2.81068e+09	3.17569e+09	3.34891e+09	3.48154e+09	3.51553e+09	3.2178e+09	3.40904e+09	3.02512e+09	2.9299e+09
Albania	Changes in inventories	9.15469e+07	1.14072e+08	1.19202e+08	1.40603e+08	1.44421e+08	1.51434e+08	1.71101e+08	1.80434e+08	1.87579e+08	2.01001e+08	2.22459e+08	2.46876e+08	3.39904e+08	3.29204e+08
Albania	Exports of goods and services	8.85531e+08	8.96576e+08	1.1309e+09	1.35141e+09	1.57614e+09	1.861e+09	2.1423e+09	2.47419e+09	2.82951e+09	2.95271e+09	3.44775e+09	3.70307e+09	3.67943e+09	3.92502e+09
Albania	Imports of goods and services	2.09331e+09	2.2755e+09	2.83215e+09	3.19176e+09	3.39691e+09	3.8721e+09	4.146e+09	4.89005e+09	5.24863e+09	5.17933e+09	5.21258e+09	5.53226e+09	5.16816e+09	5.40694e+09
Albania	Gross Domestic Product (GDP)	6.08779e+09	6.57117e+09	6.84922e+09	7.24235e+09	7.65323e+09	8.09401e+09	8.5336e+09	9.03753e+09	9.71863e+09	1.00446e+10	1.0417e+10	1.06821e+10	1.08556e+10	1.09967e+10	1.41128e+08
Albania	Agriculture, hunting, forestry, fishing (ISIC A-B)	1.31364e+09	1.34903e+09	1.37669e+09	1.41722e+09	1.50655e+09	1.517e+09	1.56442e+09	1.60712e+09	1.72074e+09	1.75351e+09	1.88765e+09	1.97775e+09	2.08473e+09	2.09989e+09
Albania	Mining, Manufacturing, Utilities (ISIC C-E)	9.2657e+08	9.69699e+08	8.51284e+08	1.13491e+09	1.26761e+09	1.34686e+09	1.45427e+09	1.09849e+09	1.35824e+09	1.43572e+09	1.70641e+09	1.80429e+09	1.82049e+09	1.97344e+09
Albania	Manufacturing (ISIC D)	1.89514e+08	2.04887e+08	2.11335e+08	2.64903e+08	3.1329e+08	3.79742e+08	4.5173e+08	5.2121e+08	5.26463e+08	5.41425e+08	5.96081e+08	6.70251e+08	6.36099e+08	6.56856e+08
Albania	Construction (ISIC F)	5.24401e+08	6.96134e+08	8.45614e+08	1.04057e+09	1.11383e+09	1.1838e+09	1.30859e+09	1.46766e+09	1.62723e+09	1.62556e+09	1.50644e+09	1.55714e+09	1.33502e+09	1.36539e+09
Albania	Wholesale, retail trade, restaurants and hotels (ISIC G-H)	1.04167e+09	1.07468e+09	1.09166e+09	1.03471e+09	1.05762e+09	1.11824e+09	1.14102e+09	1.20789e+09	1.29657e+09	1.32074e+09	1.34763e+09	1.35953e+09	1.4138e+09	1.40962e+09
Albania	Transport, storage and communication (ISIC I)	3.34828e+08	3.86944e+08	4.28392e+08	4.57164e+08	4.86318e+08	5.56535e+08	5.92826e+08	6.58135e+08	6.97983e+08	7.67911e+08	7.32166e+08	7.84173e+08	7.61747e+08	7.0505e+08
Albania	Other Activities (ISIC J-P)	1.50358e+09	1.60987e+09	1.63681e+09	1.69733e+09	1.75531e+09	1.83113e+09	1.9135e+09	2.11229e+09	2.24026e+09	2.3706e+09	2.49621e+09	2.54885e+09	2.67413e+09	2.69893e+09
Albania	Total Value Added	5.74054e+09	6.17427e+09	6.33451e+09	6.81621e+09	7.2007e+09	7.55357e+09	7.95517e+09	8.22187e+09	8.97257e+09	9.30346e+09	9.68904e+09	1.00284e+10	1.01289e+10	1.02672e+10
Algeria	Final consumption expenditure	3.80354e+10	3.96035e+10	4.19723e+10	4.36732e+10	4.55794e+10	4.66578e+10	4.85981e+10	5.06038e+10	5.48983e+10	5.86803e+10	6.20056e+10	6.65134e+10	6.93385e+10	7.1823e+10
Algeria	Household consumption expenditure (including Non-profit institutions serving households)	2.75642e+10	2.88597e+10	3.00429e+10	3.13648e+10	3.33408e+10	3.48411e+10	3.59561e+10	3.78617e+10	4.04363e+10	4.29029e+10	4.53055e+10	4.80238e+10	5.0425e+10	5.29463e+10
Algeria	General government final consumption expenditure	1.02384e+10	1.05455e+10	1.15684e+10	1.19618e+10	1.20455e+10	1.18166e+10	1.25493e+10	1.27626e+10	1.43069e+10	1.5523e+10	1.64233e+10	1.80328e+10	1.85377e+10	1.8686e+10
Algeria	Gross capital formation	2.34383e+10	2.4704e+10	2.67791e+10	2.79306e+10	3.0221e+10	3.26689e+10	3.46943e+10	3.81984e+10	4.29351e+10	4.67133e+10	4.99833e+10	5.14328e+10	5.51359e+10	5.98776e+10
Algeria	Gross fixed capital formation (including Acquisitions less disposals of valuables)	1.65629e+10	1.74573e+10	1.89237e+10	1.97375e+10	2.13559e+10	2.30858e+10	2.45171e+10	2.69933e+10	3.03405e+10	3.30105e+10	3.53212e+10	3.63455e+10	3.89624e+10	4.23131e+10
Algeria	Changes in inventories	6.8754e+09	7.24667e+09	7.85539e+09	8.19317e+09	8.86501e+09	9.58308e+09	1.01772e+10	1.12051e+10	1.25946e+10	1.37029e+10	1.46621e+10	1.50873e+10	1.61736e+10	1.75645e+10
Algeria	Exports of goods and services	4.03521e+10	3.9303e+10	4.14646e+10	4.45745e+10	4.60009e+10	4.87149e+10	4.76919e+10	4.7215e+10	4.60818e+10	4.14276e+10	4.14276e+10	4.0309e+10	3.87773e+10	3.65282e+10
Algeria	Imports of goods and services	1.44144e+10	1.60288e+10	1.97475e+10	2.07547e+10	2.3349e+10	2.48433e+10	2.44707e+10	2.73827e+10	3.15996e+10	3.56444e+10	3.72484e+10	3.55349e+10	4.04743e+10	4.44408e+10
Algeria	Gross Domestic Product (GDP)	8.01302e+10	8.25341e+10	8.7156e+10	9.34312e+10	9.74487e+10	1.03198e+11	1.04953e+11	1.08521e+11	1.11125e+11	1.12903e+11	1.16968e+11	1.20243e+11	1.24211e+11	1.27689e+11	3.47791e+09
Algeria	Agriculture, hunting, forestry, fishing (ISIC A-B)	5.52742e+09	6.23493e+09	6.16011e+09	7.36133e+09	7.75884e+09	7.9373e+09	8.58022e+09	8.79472e+09	8.46052e+09	1.02457e+10	1.07477e+10	1.19945e+10	1.28581e+10	1.39896e+10
Algeria	Mining, Manufacturing, Utilities (ISIC C-E)	4.31396e+10	4.26454e+10	4.43644e+10	4.78054e+10	4.95091e+10	5.22702e+10	5.11756e+10	5.10077e+10	4.98865e+10	4.68378e+10	4.6178e+10	4.51231e+10	4.41223e+10	4.26667e+10
Algeria	Manufacturing (ISIC D)	3.9545e+09	4.12086e+09	4.33989e+09	4.41169e+09	4.51779e+09	4.60134e+09	4.73425e+09	4.86194e+09	5.15229e+09	5.63242e+09	5.78272e+09	5.9876e+09	6.23972e+09	6.88865e+09
Algeria	Construction (ISIC F)	4.75552e+09	5.01708e+09	5.54889e+09	5.87627e+09	6.28761e+09	6.89751e+09	7.7597e+09	8.40375e+09	9.20211e+09	1.00395e+10	1.10033e+10	1.15755e+10	1.2571e+10	1.34383e+10
Algeria	Wholesale, retail trade, restaurants and hotels (ISIC G-H)	7.30137e+09	7.71947e+09	8.15225e+09	8.67204e+09	9.27862e+09	1.00682e+10	1.07583e+10	1.21873e+10	1.33252e+10	1.47311e+10	1.58602e+10	1.71099e+10	1.80266e+10	1.8315e+10
Algeria	Transport, storage and communication (ISIC I)	6.43915e+09	6.68384e+09	7.28539e+09	7.49666e+09	7.90898e+09	8.80269e+09	9.33086e+09	1.00773e+10	1.08331e+10	1.12664e+10	1.1965e+10	1.27068e+10	1.38123e+10	1.45029e+10
Algeria	Other Activities (ISIC J-P)	1.09167e+10	1.12553e+10	1.18114e+10	1.22747e+10	1.26855e+10	1.30795e+10	1.37328e+10	1.45963e+10	1.57633e+10	1.69909e+10	1.81938e+10	1.97011e+10	2.06036e+10	2.14639e+10
Algeria	Total Value Added	7.85134e+10	7.98948e+10	8.36449e+10	8.97534e+10	9.36156e+10	9.90553e+10	1.01237e+11	1.04798e+11	1.07194e+11	1.09667e+11	1.13459e+11	1.17636e+11	1.21193e+11	1.23497e+11
Andorra	Final consumption expenditure	1.68445e+09	1.77144e+09	1.86915e+09	2.07342e+09	2.26207e+09	2.43558e+09	2.53487e+09	2.53808e+09	2.3471e+09	2.28903e+09	2.19974e+09	2.10972e+09	2.07052e+09	2.05275e+09
Andorra	Household consumption expenditure (including Non-profit institutions serving households)	1.31573e+09	1.38411e+09	1.45555e+09	1.60621e+09	1.74522e+09	1.87329e+09	1.94532e+09	1.93715e+09	1.76379e+09	1.67679e+09	1.61945e+09	1.55945e+09	1.55165e+09	1.53809e+09
Andorra	General government final consumption expenditure	3.68718e+08	3.87322e+08	4.13594e+08	4.67208e+08	5.1685e+08	5.62284e+08	5.89545e+08	6.0093e+08	5.83311e+08	6.12242e+08	5.8029e+08	5.50268e+08	5.18869e+08	5.14661e+08
Andorra	Gross capital formation	5.85819e+08	6.212e+08	6.69273e+08	7.75465e+08	8.66037e+08	9.74951e+08	1.06315e+09	1.06532e+09	9.19706e+08	7.34245e+08	6.66226e+08	5.90052e+08	5.33931e+08	5.01239e+08
Andorra	Gross fixed capital formation (including Acquisitions less disposals of valuables)	5.76229e+08	6.13217e+08	6.62387e+08	7.70761e+08	8.59135e+08	9.70923e+08	1.05489e+09	1.05549e+09	9.07768e+08	7.27115e+08	6.51668e+08	5.76815e+08	5.22452e+08	4.89692e+08
Andorra	Changes in inventories	9.59028e+06	7.98365e+06	6.88654e+06	4.70372e+06	6.9022e+06	4.02803e+06	8.26035e+06	9.82667e+06	1.19379e+07	7.12991e+06	1.45573e+07	1.32361e+07	1.14792e+07	1.15474e+07
Andorra	Exports of goods and services	6.30708e+08	6.51337e+08	6.58738e+08	7.09241e+08	7.58389e+08	8.01243e+08	8.44919e+08	8.73992e+08	7.86733e+08	6.77696e+08	7.21969e+08	7.75467e+08	8.02096e+08	8.34356e+08
Andorra	Imports of goods and services	6.96949e+08	7.06267e+08	7.09208e+08	7.71024e+08	8.74492e+08	9.63635e+08	1.04587e+09	1.07767e+09	9.45996e+08	7.1208e+08	7.58888e+08	7.8206e+08	7.6077e+08	7.44242e+08
Andorra	Gross Domestic Product (GDP)	2.20403e+09	2.33771e+09	2.48795e+09	2.7871e+09	3.012e+09	3.24813e+09	3.39707e+09	3.39972e+09	3.10754e+09	2.9889e+09	2.82905e+09	2.69318e+09	2.64578e+09	2.6441e+09	-1.68045e+06
Andorra	Agriculture, hunting, forestry, fishing (ISIC A-B)	1.11543e+07	1.05635e+07	9.96113e+06	9.61451e+06	1.04041e+07	1.24484e+07	1.37815e+07	1.40414e+07	1.24504e+07	1.21484e+07	1.15059e+07	1.08967e+07	1.07397e+07	1.07282e+07
Andorra	Mining, Manufacturing, Utilities (ISIC C-E)	1.01733e+08	1.08857e+08	1.14194e+08	1.27097e+08	1.36006e+08	1.44829e+08	1.50386e+08	1.50087e+08	1.37772e+08	1.32259e+08	1.25168e+08	1.19244e+08	1.17094e+08	1.17025e+08
Andorra	Manufacturing (ISIC D)	7.75977e+07	7.99857e+07	8.46798e+07	9.24819e+07	9.95702e+07	1.08504e+08	1.13569e+08	1.1342e+08	1.0379e+08	9.98213e+07	9.44509e+07	8.99367e+07	8.83494e+07	8.8289e+07
Andorra	Construction (ISIC F)	2.442e+08	2.69167e+08	2.95844e+08	3.09308e+08	3.42942e+08	3.79819e+08	4.02494e+08	3.86691e+08	3.61675e+08	3.4732e+08	3.26597e+08	3.12439e+08	3.06609e+08	3.06135e+08
Andorra	Wholesale, retail trade, restaurants and hotels (ISIC G-H)	6.22159e+08	6.84016e+08	7.13573e+08	7.74713e+08	8.17929e+08	8.20139e+08	8.29304e+08	8.21835e+08	7.64822e+08	7.29268e+08	6.90143e+08	6.58985e+08	6.46124e+08	6.45904e+08
Andorra	Transport, storage and communication (ISIC I)	1.13754e+08	1.27234e+08	1.43561e+08	1.78222e+08	1.48875e+08	1.56631e+08	1.61006e+08	1.66395e+08	1.49743e+08	1.43991e+08	1.37026e+08	1.29989e+08	1.27771e+08	1.27792e+08
Andorra	Other Activities (ISIC J-P)	1.01119e+09	1.16395e+09	1.20796e+09	1.23601e+09	1.34087e+09	1.45574e+09	1.58756e+09	1.65879e+09	1.45374e+09	1.41779e+09	1.34859e+09	1.27374e+09	1.25586e+09	1.25534e+09
Andorra	Total Value Added	2.10092e+09	2.36431e+09	2.48148e+09	2.62172e+09	2.79173e+09	2.96961e+09	3.15277e+09	3.21402e+09	2.88764e+09	2.79232e+09	2.64879e+09	2.51341e+09	2.47272e+09	2.47146e+09
Angola	Final consumption expenditure	1.40329e+10	1.60704e+10	1.70519e+10	1.87706e+10	1.92778e+10	1.93128e+10	1.88123e+10	2.58665e+10	3.22924e+10	4.03806e+10	4.17535e+10	4.33819e+10	4.56378e+10	5.0452e+10
Angola	Household consumption expenditure (including Non-profit institutions serving households)	4.6631e+09	8.31524e+09	8.0109e+09	9.83739e+09	1.03391e+10	1.01633e+10	9.85843e+09	1.39595e+10	1.63047e+10	2.27777e+10	2.35522e+10	2.44707e+10	2.57432e+10	3.00246e+10
Angola	General government final consumption expenditure	9.23728e+09	7.74823e+09	8.99415e+09	8.93119e+09	8.94816e+09	9.14949e+09	8.95186e+09	1.19239e+10	1.59542e+10	1.76772e+10	1.82782e+10	1.89911e+10	1.99786e+10	2.05966e+10
Angola	Gross capital formation	3.27585e+09	3.00821e+09	3.23112e+09	3.3636e+09	2.69092e+09	2.8738e+09	4.77546e+09	7.07618e+09	9.07929e+09	9.94972e+09	1.02882e+10	1.06893e+10	1.12445e+10	1.09268e+10
Angola	Gross fixed capital formation (including Acquisitions less disposals of valuables)	3.27641e+09	3.00873e+09	3.07053e+09	3.19642e+09	2.55714e+09	2.73102e+09	4.53896e+09	6.74944e+09	8.64603e+09	9.50199e+09	9.82505e+09	1.02082e+10	1.07391e+10	1.04357e+10
Angola	Changes in inventories			1.60588e+08	1.67172e+08	1.33776e+08	1.42772e+08	2.36502e+08	3.26829e+08	4.33317e+08	4.47889e+08	4.63342e+08	4.8129e+08	5.05607e+08	4.91323e+08
Angola	Exports of goods and services	1.94911e+10	1.69085e+10	1.92554e+10	1.84659e+10	2.0571e+10	2.82235e+10	3.11587e+10	3.8294e+10	4.34637e+10	3.03811e+10	3.14141e+10	3.26393e+10	3.43365e+10	3.46656e+10
Angola	Imports of goods and services	1.36735e+10	1.68239e+10	1.59911e+10	1.67427e+10	1.58553e+10	1.75994e+10	1.52235e+10	2.25308e+10	2.91548e+10	2.3732e+10	2.45389e+10	2.54959e+10	2.68217e+10	2.86992e+10
Angola	Gross Domestic Product (GDP)	2.00667e+10	2.06968e+10	2.37041e+10	2.44863e+10	2.72288e+10	3.28107e+10	3.89134e+10	4.79373e+10	5.45601e+10	5.58641e+10	5.77914e+10	6.00299e+10	6.31514e+10	6.63469e+10	3.19546e+09
Angola	Agriculture, hunting, forestry, fishing (ISIC A-B)	1.52579e+09	1.65052e+09	1.78392e+09	1.82852e+09	2.02417e+09	2.34399e+09	2.57304e+09	3.25959e+09	3.31537e+09	4.23528e+09	4.48467e+09	4.90412e+09	5.15854e+09	5.28148e+09
Angola	Mining, Manufacturing, Utilities (ISIC C-E)	1.34526e+10	1.25593e+10	1.45648e+10	1.61462e+10	1.82803e+10	2.16466e+10	2.5028e+10	3.01951e+10	3.36853e+10	3.23609e+10	3.17754e+10	3.06726e+10	3.22638e+10	3.42117e+10
Angola	Manufacturing (ISIC D)	7.04516e+08	7.58823e+08	8.24802e+08	8.44597e+08	9.34124e+08	1.08078e+09	1.56389e+09	2.07325e+09	2.30193e+09	2.42324e+09	2.68156e+09	3.03071e+09	3.18436e+09	3.24469e+09
Angola	Construction (ISIC F)	6.65095e+08	7.0794e+08	7.71853e+08	7.97324e+08	8.84233e+08	1.02571e+09	1.33342e+09	1.82812e+09	2.29612e+09	2.84214e+09	3.2983e+09	3.69476e+09	3.88644e+09	3.8133e+09
Angola	Wholesale, retail trade, restaurants and hotels (ISIC G-H)	2.05697e+09	2.201e+09	2.41008e+09	2.46551e+09	2.72685e+09	3.1686e+09	4.37584e+09	5.32977e+09	6.76348e+09	6.66541e+09	7.2473e+09	7.93362e+09	8.3452e+09	8.81708e+09
Angola	Transport, storage and communication (ISIC I)	6.27542e+08	6.50559e+08	7.23027e+08	7.51948e+08	8.50454e+08	9.5676e+08	1.32129e+09	1.60933e+09	2.04224e+09	2.01262e+09	2.18832e+09	2.39556e+09	2.51983e+09	2.66232e+09
Angola	Other Activities (ISIC J-P)	1.27976e+09	1.37025e+09	1.49137e+09	1.55292e+09	1.68798e+09	1.91072e+09	2.16397e+09	2.26597e+09	2.31706e+09	2.4516e+09	2.56919e+09	2.81477e+09	2.96097e+09	3.13284e+09
Angola	Total Value Added	1.96689e+10	1.93378e+10	2.18972e+10	2.36222e+10	2.6501e+10	3.10524e+10	3.68651e+10	4.44877e+10	5.0433e+10	5.09217e+10	5.2184e+10	5.34104e+10	5.61815e+10	5.89428e+10
Anguilla	Final consumption expenditure	1.63224e+08	1.57527e+08	1.60925e+08	1.69255e+08	1.88955e+08	2.05766e+08	3.13056e+08	3.06244e+08	3.09975e+08	2.51403e+08	2.35109e+08	2.46704e+08	2.31646e+08	2.21724e+08
Anguilla	Household consumption expenditure (including Non-profit institutions serving households)	1.38494e+08	1.28912e+08	1.33947e+08	1.41322e+08	1.6777e+08	1.77962e+08	2.82192e+08	2.72691e+08	2.73092e+08	2.11085e+08	1.92301e+08	2.06988e+08	1.93943e+08	1.84344e+08
Anguilla	General government final consumption expenditure	2.47299e+07	2.86143e+07	2.6978e+07	2.7933e+07	2.11848e+07	2.78037e+07	3.08643e+07	3.35533e+07	3.68835e+07	4.03183e+07	4.28078e+07	3.97161e+07	3.77031e+07	3.73802e+07
Anguilla	Gross capital formation	6.98694e+07	5.49913e+07	3.96333e+07	4.48492e+07	6.66638e+07	8.02259e+07	1.09641e+08	1.62234e+08	1.76823e+08	7.47013e+07	5.78805e+07	4.37765e+07	4.48801e+07	4.67555e+07
Anguilla	Gross fixed capital formation (including Acquisitions less disposals of valuables)	6.98694e+07	5.49913e+07	3.96333e+07	4.48492e+07	6.66638e+07	8.02259e+07	1.09641e+08	1.62234e+08	1.76823e+08	7.47013e+07	5.78805e+07	4.37765e+07	4.48801e+07	4.67555e+07
Anguilla	Exports of goods and services	7.88577e+07	8.33727e+07	7.45922e+07	8.04379e+07	8.44794e+07	1.13575e+08	1.31964e+08	1.2617e+08	1.18049e+08	1.19514e+08	1.14162e+08	1.17018e+08	1.13674e+08	1.17902e+08
Anguilla	Imports of goods and services	1.41145e+08	1.21281e+08	1.06994e+08	1.16126e+08	1.37653e+08	1.70571e+08	2.79845e+08	2.82315e+08	2.96704e+08	1.94387e+08	1.67082e+08	1.5714e+08	1.53521e+08	1.51726e+08
Anguilla	Gross Domestic Product (GDP)	1.70806e+08	1.7461e+08	1.68157e+08	1.78416e+08	2.02445e+08	2.28995e+08	2.74816e+08	3.12333e+08	3.08144e+08	2.51232e+08	2.4007e+08	2.50358e+08	2.36679e+08	2.34656e+08	-2.0224e+06
Anguilla	Agriculture, hunting, forestry, fishing (ISIC A-B)	4.08943e+06	4.0025e+06	4.36268e+06	4.66251e+06	5.01736e+06	5.34774e+06	5.48335e+06	5.79147e+06	6.25073e+06	4.81606e+06	4.6435e+06	5.90564e+06	6.36861e+06	5.35252e+06
Anguilla	Mining, Manufacturing, Utilities (ISIC C-E)	1.05446e+07	1.07639e+07	1.18792e+07	1.28452e+07	1.32271e+07	1.70208e+07	1.99432e+07	2.45861e+07	2.39666e+07	2.13253e+07	1.65979e+07	1.61535e+07	1.49088e+07	1.41465e+07
Anguilla	Manufacturing (ISIC D)	4.23243e+06	3.48594e+06	4.47491e+06	4.49764e+06	3.81716e+06	6.0183e+06	7.75188e+06	1.12897e+07	1.11323e+07	9.25496e+06	4.59711e+06	4.52617e+06	4.54334e+06	4.4821e+06
Anguilla	Construction (ISIC F)	1.48105e+07	1.33937e+07	1.0323e+07	1.15869e+07	1.64935e+07	2.16771e+07	2.69518e+07	4.41875e+07	4.78913e+07	1.98548e+07	1.51502e+07	1.24231e+07	1.3521e+07	1.40995e+07
Anguilla	Wholesale, retail trade, restaurants and hotels (ISIC G-H)	5.22688e+07	5.6178e+07	5.02971e+07	5.23872e+07	5.5077e+07	6.34315e+07	7.20875e+07	7.56909e+07	6.61397e+07	6.29261e+07	6.20918e+07	6.42111e+07	6.31803e+07	6.53132e+07
Anguilla	Transport, storage and communication (ISIC I)	1.62139e+07	1.5648e+07	1.48877e+07	1.72707e+07	1.94382e+07	2.27508e+07	3.06576e+07	3.59515e+07	3.59093e+07	2.81693e+07	2.61828e+07	2.5365e+07	2.36147e+07	2.34175e+07
Anguilla	Other Activities (ISIC J-P)	5.41971e+07	5.78559e+07	5.89847e+07	6.13956e+07	6.52141e+07	6.99727e+07	7.58143e+07	8.3162e+07	8.74817e+07	8.91695e+07	8.94667e+07	8.78545e+07	8.5711e+07	8.56625e+07
Anguilla	Total Value Added	1.51987e+08	1.57688e+08	1.50589e+08	1.59745e+08	1.74429e+08	2.00201e+08	2.30074e+08	2.70214e+08	2.69628e+08	2.26076e+08	2.13692e+08	2.11021e+08	2.06821e+08	2.07578e+08
Antigua and Barbuda	Final consumption expenditure	6.21716e+08	6.89133e+08	7.02679e+08	7.58479e+08	7.74979e+08	8.59578e+08	9.82723e+08	1.10459e+09	1.06812e+09	8.02533e+08	8.62055e+08	8.75345e+08	9.22077e+08	9.18913e+08
Antigua and Barbuda	Household consumption expenditure (including Non-profit institutions serving households)	4.67409e+08	5.24099e+08	5.14437e+08	5.89829e+08	5.98615e+08	6.91163e+08	8.09528e+08	9.11527e+08	8.44311e+08	5.85806e+08	6.79271e+08	6.99759e+08	7.41945e+08	7.37165e+08
Antigua and Barbuda	General government final consumption expenditure	1.54307e+08	1.65034e+08	1.88243e+08	1.6865e+08	1.76364e+08	1.68415e+08	1.73195e+08	1.93065e+08	2.23814e+08	2.16726e+08	1.82784e+08	1.75586e+08	1.80132e+08	1.81748e+08
Antigua and Barbuda	Gross capital formation	2.58588e+08	1.73684e+08	1.89363e+08	2.11157e+08	2.26285e+08	2.75248e+08	4.17266e+08	4.70783e+08	4.71532e+08	4.18278e+08	2.87736e+08	2.07562e+08	2.27663e+08	2.56288e+08
Antigua and Barbuda	Gross fixed capital formation (including Acquisitions less disposals of valuables)	2.58588e+08	1.73684e+08	1.89363e+08	2.11157e+08	2.26285e+08	2.75248e+08	4.17266e+08	4.70783e+08	4.71532e+08	4.18278e+08	2.87736e+08	2.07562e+08	2.27663e+08	2.56288e+08
Antigua and Barbuda	Exports of goods and services	5.03997e+08	4.7146e+08	4.495e+08	4.91814e+08	5.58834e+08	5.45267e+08	5.46066e+08	5.58268e+08	5.75114e+08	5.07406e+08	4.66669e+08	4.73068e+08	4.64631e+08	4.60984e+08
Antigua and Barbuda	Imports of goods and services	5.38115e+08	5.1512e+08	4.98433e+08	5.68477e+08	6.19918e+08	6.82722e+08	8.15272e+08	8.9545e+08	8.75691e+08	6.38274e+08	6.04844e+08	5.6446e+08	5.89964e+08	5.96081e+08
Antigua and Barbuda	Gross Domestic Product (GDP)	8.4619e+08	8.19161e+08	8.43113e+08	8.92973e+08	9.4018e+08	9.97374e+08	1.13079e+09	1.2382e+09	1.23908e+09	1.08994e+09	1.01162e+09	9.91519e+08	1.02441e+09	1.0401e+09	1.56914e+07
Antigua and Barbuda	Agriculture, hunting, forestry, fishing (ISIC A-B)	1.41167e+07	1.38151e+07	1.54772e+07	1.64039e+07	1.60803e+07	1.79667e+07	1.89889e+07	1.88124e+07	1.75217e+07	1.5058e+07	1.53117e+07	1.59369e+07	1.55728e+07	1.56133e+07
Antigua and Barbuda	Mining, Manufacturing, Utilities (ISIC C-E)	4.57193e+07	4.70277e+07	4.93966e+07	5.28797e+07	5.05864e+07	5.4163e+07	6.28438e+07	6.90085e+07	6.88612e+07	6.79194e+07	6.43751e+07	6.61185e+07	6.31566e+07	6.46088e+07
Antigua and Barbuda	Manufacturing (ISIC D)	1.53127e+07	1.56028e+07	1.64295e+07	1.66725e+07	1.74738e+07	1.83259e+07	2.06031e+07	2.2485e+07	2.04326e+07	2.2601e+07	2.06103e+07	2.11796e+07	1.85616e+07	1.88372e+07
Antigua and Barbuda	Construction (ISIC F)	8.37859e+07	5.92684e+07	6.32775e+07	6.95055e+07	7.38781e+07	9.43556e+07	1.37841e+08	1.47979e+08	1.48871e+08	1.35136e+08	8.79527e+07	6.65218e+07	7.31716e+07	8.14607e+07
Antigua and Barbuda	Wholesale, retail trade, restaurants and hotels (ISIC G-H)	2.44113e+08	2.39125e+08	2.40293e+08	2.50112e+08	2.56604e+08	2.698e+08	2.85654e+08	3.15734e+08	3.27798e+08	2.65886e+08	2.54344e+08	2.49524e+08	2.60489e+08	2.55027e+08
Antigua and Barbuda	Transport, storage and communication (ISIC I)	1.23203e+08	1.10949e+08	1.05061e+08	1.18137e+08	1.26899e+08	1.29489e+08	1.37128e+08	1.4232e+08	1.41758e+08	1.21367e+08	1.12417e+08	1.12621e+08	1.12679e+08	1.14445e+08
Antigua and Barbuda	Other Activities (ISIC J-P)	2.59998e+08	2.68709e+08	2.83613e+08	2.93523e+08	3.02146e+08	3.17948e+08	3.50656e+08	3.72833e+08	3.75092e+08	3.62912e+08	3.55337e+08	3.62325e+08	3.68635e+08	3.72679e+08
Antigua and Barbuda	Total Value Added	7.69962e+08	7.37342e+08	7.56619e+08	7.99463e+08	8.24599e+08	8.83722e+08	9.9618e+08	1.07058e+09	1.08404e+09	9.72719e+08	8.91285e+08	8.73004e+08	8.9422e+08	9.04802e+08
Argentina	Final consumption expenditure	1.61321e+11	1.5281e+11	1.32733e+11	1.423e+11	1.5451e+11	1.69216e+11	1.81576e+11	1.9774e+11	2.08585e+11	2.17124e+11	2.32651e+11	2.57157e+11	2.68732e+11	2.80706e+11
Argentina	Household consumption expenditure (including Non-profit institutions serving households)	1.39323e+11	1.31324e+11	1.12474e+11	1.21661e+11	1.33219e+11	1.46216e+11	1.57484e+11	1.71728e+11	1.81404e+11	1.87734e+11	2.01146e+11	2.22843e+11	2.32237e+11	2.42377e+11
Argentina	General government final consumption expenditure	2.20038e+10	2.15485e+10	2.04542e+10	2.0753e+10	2.13171e+10	2.29996e+10	2.40411e+10	2.59364e+10	2.70788e+10	2.93789e+10	3.14955e+10	3.42586e+10	3.64923e+10	3.8345e+10
Argentina	Gross capital formation	3.88448e+10	3.27613e+10	2.08206e+10	2.87671e+10	3.86702e+10	4.25253e+10	5.02056e+10	5.83746e+10	6.20166e+10	4.71494e+10	6.52734e+10	7.54268e+10	6.72354e+10	6.8839e+10
Argentina	Gross fixed capital formation (including Acquisitions less disposals of valuables)	3.77371e+10	3.18271e+10	2.02269e+10	2.79467e+10	3.47366e+10	4.07721e+10	4.77175e+10	5.43648e+10	5.86773e+10	5.01023e+10	6.0713e+10	7.17668e+10	6.80046e+10	7.00327e+10
Argentina	Changes in inventories					9.1815e+09	1.75323e+09	3.42655e+09	7.60606e+09	5.09445e+09	-1.39384e+10	8.75403e+09	4.89446e+09	-8.71341e+09	-1.02387e+10
Argentina	Exports of goods and services	3.41613e+10	3.50977e+10	3.61832e+10	3.83526e+10	4.14645e+10	4.65966e+10	4.92858e+10	5.32525e+10	5.36609e+10	4.8969e+10	5.60238e+10	5.879e+10	5.53383e+10	5.30362e+10
Argentina	Imports of goods and services	3.684e+10	3.1702e+10	1.58321e+10	2.17795e+10	3.05179e+10	3.54266e+10	3.92573e+10	4.78618e+10	5.43332e+10	4.38276e+10	5.91582e+10	7.08472e+10	6.74919e+10	6.88795e+10
Argentina	Gross Domestic Product (GDP)	2.01963e+11	1.93058e+11	1.72026e+11	1.87228e+11	2.04134e+11	2.22911e+11	2.41555e+11	2.60886e+11	2.68979e+11	2.69115e+11	2.93702e+11	3.18828e+11	3.21845e+11	3.3126e+11	9.41484e+09
Argentina	Agriculture, hunting, forestry, fishing (ISIC A-B)	1.42792e+10	1.44294e+10	1.40997e+10	1.50686e+10	1.48384e+10	1.65783e+10	1.73495e+10	1.83614e+10	1.62944e+10	1.53523e+10	1.77233e+10	1.71968e+10	1.60867e+10	1.77757e+10
Argentina	Mining, Manufacturing, Utilities (ISIC C-E)	5.08519e+10	4.85155e+10	4.41631e+10	4.97664e+10	5.43112e+10	5.79098e+10	6.31339e+10	6.66944e+10	6.82739e+10	6.78432e+10	7.438e+10	8.13216e+10	8.00649e+10	8.02195e+10
Argentina	Manufacturing (ISIC D)	3.67679e+10	3.4061e+10	3.03296e+10	3.51723e+10	3.93846e+10	4.30423e+10	4.7246e+10	5.10619e+10	5.27049e+10	5.18805e+10	5.77888e+10	6.43994e+10	6.33787e+10	6.35052e+10
Argentina	Construction (ISIC F)	8.49415e+09	7.50873e+09	5.00081e+09	6.71963e+09	8.69547e+09	1.01884e+10	1.17856e+10	1.29459e+10	1.31401e+10	1.26516e+10	1.34023e+10	1.46595e+10	1.42852e+10	1.45515e+10
Argentina	Wholesale, retail trade, restaurants and hotels (ISIC G-H)	3.02335e+10	2.78764e+10	2.32019e+10	2.59086e+10	2.91286e+10	3.20497e+10	3.51779e+10	3.95421e+10	4.25536e+10	4.13698e+10	4.74299e+10	5.47664e+10	5.56318e+10	5.70556e+10
Argentina	Transport, storage and communication (ISIC I)	1.24486e+10	1.18795e+10	1.09363e+10	1.18352e+10	1.34269e+10	1.51452e+10	1.67471e+10	1.88054e+10	2.00166e+10	1.99159e+10	2.20021e+10	2.38235e+10	2.41465e+10	2.48194e+10
Argentina	Other Activities (ISIC J-P)	6.35577e+10	6.19396e+10	5.77308e+10	5.81136e+10	5.99898e+10	6.44936e+10	6.86642e+10	7.28744e+10	7.58854e+10	7.89491e+10	8.29469e+10	8.81428e+10	9.21757e+10	9.63823e+10
Argentina	Total Value Added	1.79675e+11	1.72021e+11	1.5512e+11	1.67452e+11	1.80342e+11	1.96365e+11	2.12816e+11	2.29206e+11	2.35919e+11	2.35668e+11	2.57659e+11	2.79555e+11	2.81856e+11	2.90336e+11
Armenia	Final consumption expenditure	2.81228e+09	3.01025e+09	3.25185e+09	3.50533e+09	3.82724e+09	4.2168e+09	4.60072e+09	5.15225e+09	5.37459e+09	5.16157e+09	5.36183e+09	5.50025e+09	5.91873e+09	6.13657e+09
Armenia	Household consumption expenditure (including Non-profit institutions serving households)	2.49638e+09	2.68336e+09	2.92343e+09	3.12399e+09	3.40202e+09	3.69976e+09	4.00452e+09	4.53489e+09	4.77888e+09	4.56845e+09	4.74559e+09	4.87326e+09	5.31673e+09	5.41221e+09
Armenia	General government final consumption expenditure	3.21878e+08	3.3562e+08	3.4296e+08	3.9136e+08	4.34329e+08	5.17048e+08	5.89567e+08	6.20334e+08	6.08796e+08	6.01343e+08	6.24764e+08	6.3679e+08	6.27582e+08	7.30165e+08
Armenia	Gross capital formation	5.37819e+08	6.25441e+08	7.66275e+08	1.00163e+09	1.17653e+09	1.49299e+09	1.97351e+09	2.36231e+09	2.6611e+09	1.83947e+09	1.84897e+09	1.75286e+09	1.76169e+09	1.5583e+09
Armenia	Gross fixed capital formation (including Acquisitions less disposals of valuables)	5.31638e+08	5.5984e+08	7.4537e+08	9.5007e+08	1.13084e+09	1.4601e+09	1.95271e+09	2.30748e+09	2.5821e+09	1.9275e+09	1.87157e+09	1.65299e+09	1.62116e+09	1.49326e+09
Armenia	Changes in inventories	4.69316e+06	5.31018e+07	1.71274e+07	4.47686e+07	4.22997e+07	3.28937e+07	2.17507e+07	5.82866e+07	8.65006e+07	-1.19356e+08	-4.23639e+07	9.78195e+07	1.6118e+08	7.07029e+07
Armenia	Exports of goods and services	5.56641e+08	7.06877e+08	9.60059e+08	1.23914e+09	1.2177e+09	1.41179e+09	1.30818e+09	1.26228e+09	1.09718e+09	9.82678e+08	1.24269e+09	1.42569e+09	1.54559e+09	1.7977e+09
Armenia	Imports of goods and services	1.19202e+09	1.26839e+09	1.50871e+09	1.90915e+09	1.85338e+09	2.11846e+09	2.19813e+09	2.48378e+09	2.66455e+09	2.15419e+09	2.42971e+09	2.39568e+09	2.32899e+09	2.34478e+09
Armenia	Gross Domestic Product (GDP)	2.71033e+09	2.96934e+09	3.41624e+09	3.89591e+09	4.30373e+09	4.90047e+09	5.54723e+09	6.30993e+09	6.74833e+09	5.79344e+09	5.92177e+09	6.19718e+09	6.64122e+09	6.87445e+09	2.33229e+08
Armenia	Agriculture, hunting, forestry, fishing (ISIC A-B)	6.09855e+08	6.81208e+08	7.07094e+08	7.36792e+08	8.41416e+08	9.3579e+08	9.40748e+08	1.03819e+09	1.07208e+09	1.13607e+09	9.54032e+08	1.08775e+09	1.19084e+09	1.27669e+09
Armenia	Mining, Manufacturing, Utilities (ISIC C-E)	7.1142e+08	7.32426e+08	8.6433e+08	9.79703e+08	1.00582e+09	1.06703e+09	1.03572e+09	1.06499e+09	1.08741e+09	1.00824e+09	1.09832e+09	1.24579e+09	1.32192e+09	1.39889e+09
Armenia	Manufacturing (ISIC D)	5.10505e+08	5.25459e+08	6.1327e+08	7.11213e+08	6.09873e+08	6.63772e+08	6.60709e+08	6.71245e+08	6.76999e+08	6.28853e+08	7.07839e+08	7.95449e+08	8.28329e+08	8.86926e+08
Armenia	Construction (ISIC F)	3.02371e+08	3.16885e+08	4.48392e+08	6.52411e+08	7.52229e+08	9.61911e+08	1.32501e+09	1.56585e+09	1.74259e+09	1.01839e+09	1.05212e+09	9.24038e+08	9.68838e+08	8.64022e+08
Armenia	Wholesale, retail trade, restaurants and hotels (ISIC G-H)	2.86348e+08	3.356e+08	4.01713e+08	4.58355e+08	5.0694e+08	5.76645e+08	6.44301e+08	7.08682e+08	7.65965e+08	7.36816e+08	7.67557e+08	8.04561e+08	8.50659e+08	8.74058e+08
Armenia	Transport, storage and communication (ISIC I)	1.68322e+08	1.94917e+08	1.91603e+08	2.07506e+08	2.4797e+08	2.92602e+08	3.42479e+08	4.17918e+08	4.53194e+08	4.08374e+08	4.3725e+08	4.47559e+08	4.89775e+08	5.09294e+08
Armenia	Other Activities (ISIC J-P)	4.28772e+08	4.5673e+08	4.86041e+08	5.31671e+08	6.13867e+08	7.02443e+08	8.20481e+08	9.1953e+08	9.23614e+08	9.13173e+08	9.51452e+08	1.0329e+09	1.10861e+09	1.20868e+09
Armenia	Total Value Added	2.46637e+09	2.67849e+09	3.04878e+09	3.51981e+09	3.94274e+09	4.53642e+09	5.18664e+09	5.83372e+09	6.17323e+09	5.30196e+09	5.36612e+09	5.62012e+09	6.01297e+09	6.216e+09
Aruba	Final consumption expenditure	1.56484e+09	1.63705e+09	1.67048e+09	1.69955e+09	1.73116e+09	1.76718e+09	1.80286e+09	1.87838e+09	1.87991e+09	1.80503e+09	1.78096e+09	1.76383e+09	1.79088e+09	1.88176e+09
Aruba	Household consumption expenditure (including Non-profit institutions serving households)	1.07964e+09	1.08504e+09	1.11651e+09	1.15224e+09	1.17874e+09	1.22825e+09	1.25158e+09	1.30041e+09	1.29108e+09	1.21783e+09	1.16398e+09	1.16039e+09	1.20634e+09	1.2727e+09
Aruba	General government final consumption expenditure	4.85491e+08	5.53945e+08	5.55607e+08	5.48384e+08	5.53319e+08	5.38933e+08	5.51328e+08	5.78159e+08	5.89411e+08	5.88545e+08	6.19704e+08	6.05855e+08	5.85949e+08	6.10349e+08
Aruba	Gross capital formation	5.72381e+08	5.30025e+08	5.88857e+08	6.41855e+08	6.69454e+08	7.82592e+08	8.272e+08	8.49249e+08	8.64897e+08	8.81967e+08	7.36158e+08	6.55785e+08	6.65743e+08	5.96139e+08
Aruba	Gross fixed capital formation (including Acquisitions less disposals of valuables)	5.15895e+08	5.06468e+08	5.62686e+08	6.13328e+08	6.39701e+08	7.4781e+08	7.90435e+08	8.11504e+08	8.26457e+08	8.42768e+08	7.0344e+08	6.26639e+08	6.36154e+08	5.69644e+08
Aruba	Exports of goods and services	1.63508e+09	1.54351e+09	1.39225e+09	1.35884e+09	1.49472e+09	1.59785e+09	1.52915e+09	1.48604e+09	1.56165e+09	1.5878e+09	1.3638e+09	1.22459e+09	1.40125e+09	1.52349e+09
Aruba	Imports of goods and services	1.57918e+09	1.52548e+09	1.51175e+09	1.54955e+09	1.58519e+09	1.81663e+09	1.81481e+09	1.83872e+09	1.88522e+09	1.85334e+09	1.71185e+09	1.55773e+09	1.69391e+09	1.76787e+09
Aruba	Gross Domestic Product (GDP)	2.18801e+09	2.18003e+09	2.13285e+09	2.14277e+09	2.3039e+09	2.33101e+09	2.33702e+09	2.40268e+09	2.34656e+09	2.0944e+09	2.02458e+09	2.09505e+09	2.06765e+09	2.14855e+09	8.09051e+07
Aruba	Agriculture, hunting, forestry, fishing (ISIC A-B)	8.97133e+06	8.83214e+06	8.58032e+06	8.60064e+06	9.0224e+06	9.01117e+06	9.20048e+06	9.64914e+06	8.95359e+06	9.39018e+06	9.09947e+06	9.61754e+06	9.35167e+06	9.74579e+06
Aruba	Mining, Manufacturing, Utilities (ISIC C-E)	2.14027e+08	2.32821e+08	2.15436e+08	2.34781e+08	2.71238e+08	2.9252e+08	2.99681e+08	3.10914e+08	2.98583e+08	2.03227e+08	2.03304e+08	1.93051e+08	1.99595e+08	2.07046e+08
Aruba	Manufacturing (ISIC D)	8.58181e+07	8.44867e+07	8.20778e+07	8.22722e+07	8.63251e+07	8.62123e+07	8.80138e+07	9.23025e+07	8.56496e+07	8.56832e+07	8.30278e+07	8.77571e+07	8.53306e+07	8.89264e+07
Aruba	Construction (ISIC F)	1.32234e+08	1.14456e+08	1.10689e+08	1.27635e+08	1.42279e+08	1.48704e+08	1.7194e+08	1.76106e+08	1.45395e+08	1.08687e+08	9.5799e+07	1.13519e+08	1.05723e+08	1.09314e+08
Aruba	Wholesale, retail trade, restaurants and hotels (ISIC G-H)	5.26314e+08	4.93468e+08	4.65032e+08	4.43259e+08	4.85569e+08	4.80067e+08	4.50602e+08	4.65737e+08	4.68529e+08	3.76342e+08	3.68702e+08	3.93301e+08	3.78745e+08	3.96063e+08
Aruba	Transport, storage and communication (ISIC I)	1.81632e+08	1.87621e+08	1.92133e+08	1.81551e+08	1.84301e+08	1.84844e+08	1.87974e+08	1.866e+08	1.84388e+08	1.83823e+08	1.77929e+08	1.89859e+08	1.83521e+08	1.91411e+08
Aruba	Other Activities (ISIC J-P)	1.06219e+09	1.09356e+09	1.08627e+09	1.08329e+09	1.13448e+09	1.13796e+09	1.14596e+09	1.13931e+09	1.11471e+09	1.11152e+09	1.09309e+09	1.10538e+09	1.10153e+09	1.14608e+09
Aruba	Total Value Added	2.12537e+09	2.13076e+09	2.07813e+09	2.07912e+09	2.22689e+09	2.25311e+09	2.26535e+09	2.28831e+09	2.22056e+09	1.99299e+09	1.94792e+09	2.00473e+09	1.97846e+09	2.05966e+09
Australia	Final consumption expenditure	4.67515e+11	4.82003e+11	5.01111e+11	5.25734e+11	5.47747e+11	5.64997e+11	5.89767e+11	6.1544e+11	6.2206e+11	6.3556e+11	6.58366e+11	6.77217e+11	6.89699e+11	7.05452e+11
Australia	Household consumption expenditure (including Non-profit institutions serving households)	3.55321e+11	3.66301e+11	3.81976e+11	4.01626e+11	4.19732e+11	4.32964e+11	4.53644e+11	4.75106e+11	4.7536e+11	4.86252e+11	5.04087e+11	5.1694e+11	5.27756e+11	5.40868e+11
Australia	General government final consumption expenditure	1.11993e+11	1.15492e+11	1.18996e+11	1.24022e+11	1.28014e+11	1.32033e+11	1.36239e+11	1.40573e+11	1.46609e+11	1.49255e+11	1.5425e+11	1.60139e+11	1.6189e+11	1.64602e+11
Australia	Gross capital formation	1.37781e+11	1.49421e+11	1.66204e+11	1.85145e+11	1.98191e+11	2.1115e+11	2.25911e+11	2.49235e+11	2.47643e+11	2.537e+11	2.6813e+11	2.96324e+11	3.00857e+11	2.92512e+11
Australia	Gross fixed capital formation (including Acquisitions less disposals of valuables)	1.38274e+11	1.50696e+11	1.69589e+11	1.84051e+11	1.95662e+11	2.13821e+11	2.24692e+11	2.46044e+11	2.51293e+11	2.56584e+11	2.66029e+11	2.95863e+11	3.03313e+11	2.98924e+11
Australia	Changes in inventories	-1.20892e+10	-6.97458e+09	8.50338e+09	-3.0776e+10	-4.41852e+10	-2.6713e+09	-3.6594e+10	-5.56519e+10	1.15071e+09	-5.90125e+09	-4.8849e+10	-3.85835e+10	-1.49832e+10	1.87349e+10
Australia	Exports of goods and services	1.40096e+11	1.38968e+11	1.39244e+11	1.4093e+11	1.4563e+11	1.49345e+11	1.55151e+11	1.60663e+11	1.63476e+11	1.71878e+11	1.72983e+11	1.81182e+11	1.92103e+11	2.05102e+11
Australia	Imports of goods and services	1.03477e+11	1.04899e+11	1.18742e+11	1.34481e+11	1.51164e+11	1.63117e+11	1.79835e+11	2.05856e+11	1.98316e+11	2.11069e+11	2.32663e+11	2.59267e+11	2.6192e+11	2.55847e+11
Australia	Gross Domestic Product (GDP)	6.4313e+11	6.6801e+11	6.88577e+11	7.17208e+11	7.40287e+11	7.62377e+11	7.91111e+11	8.20363e+11	8.3466e+11	8.51043e+11	8.701e+11	9.01553e+11	9.25341e+11	9.52152e+11	2.68111e+10
Australia	Agriculture, hunting, forestry, fishing (ISIC A-B)	1.91172e+10	1.96573e+10	1.55034e+10	1.95045e+10	2.03312e+10	2.08809e+10	1.77366e+10	1.89431e+10	2.22676e+10	2.20661e+10	2.28894e+10	2.31176e+10	2.2487e+10	2.28756e+10
Australia	Mining, Manufacturing, Utilities (ISIC C-E)	1.36477e+11	1.38154e+11	1.41005e+11	1.40449e+11	1.43192e+11	1.44381e+11	1.51399e+11	1.55692e+11	1.55147e+11	1.61015e+11	1.63013e+11	1.68676e+11	1.77221e+11	1.83731e+11
Australia	Manufacturing (ISIC D)	7.08763e+10	7.25612e+10	7.54138e+10	7.64619e+10	7.58164e+10	7.55495e+10	7.7082e+10	8.00914e+10	7.58715e+10	7.61993e+10	7.60753e+10	7.60797e+10	7.52245e+10	7.36818e+10
Australia	Construction (ISIC F)	3.23061e+10	3.62691e+10	4.21951e+10	4.52182e+10	4.73948e+10	5.12534e+10	5.41462e+10	5.79592e+10	6.02535e+10	6.0562e+10	6.22272e+10	6.89036e+10	6.92685e+10	7.18029e+10
Australia	Wholesale, retail trade, restaurants and hotels (ISIC G-H)	7.13115e+10	7.38432e+10	7.71176e+10	8.10248e+10	8.5184e+10	8.71741e+10	9.02141e+10	9.29432e+10	9.30415e+10	9.4649e+10	9.55265e+10	9.93548e+10	1.01849e+11	1.01928e+11
Australia	Transport, storage and communication (ISIC I)	5.05106e+10	5.20829e+10	5.53448e+10	5.75822e+10	6.03781e+10	6.2441e+10	6.63433e+10	7.01051e+10	7.00292e+10	7.11682e+10	7.34782e+10	7.53687e+10	7.60358e+10	7.62288e+10
Australia	Other Activities (ISIC J-P)	2.8551e+11	2.96678e+11	3.03586e+11	3.14692e+11	3.24368e+11	3.35608e+11	3.48795e+11	3.60583e+11	3.70559e+11	3.77661e+11	3.87523e+11	3.98809e+11	4.09855e+11	4.24086e+11
Australia	Total Value Added	5.95164e+11	6.16737e+11	6.35156e+11	6.58511e+11	6.80759e+11	7.01739e+11	7.2897e+11	7.56358e+11	7.71393e+11	7.87276e+11	8.04796e+11	8.34414e+11	8.57152e+11	8.81439e+11
Austria	Final consumption expenditure	2.14235e+11	2.16118e+11	2.17798e+11	2.21157e+11	2.25774e+11	2.30697e+11	2.3626e+11	2.38997e+11	2.42829e+11	2.45477e+11	2.48409e+11	2.49734e+11	2.51111e+11	2.51315e+11
Austria	Household consumption expenditure (including Non-profit institutions serving households)	1.56864e+11	1.58892e+11	1.60072e+11	1.62839e+11	1.66633e+11	1.70223e+11	1.73841e+11	1.75674e+11	1.7716e+11	1.7818e+11	1.80811e+11	1.82084e+11	1.83208e+11	1.82951e+11
Austria	General government final consumption expenditure	5.73577e+10	5.72203e+10	5.77192e+10	5.83136e+10	5.91415e+10	6.04738e+10	6.24141e+10	6.33158e+10	6.56463e+10	6.72638e+10	6.75695e+10	6.76251e+10	6.78797e+10	6.83358e+10
Austria	Gross capital formation	7.30944e+10	7.23652e+10	6.95666e+10	7.278e+10	7.39822e+10	7.51542e+10	7.67771e+10	8.23849e+10	8.18055e+10	7.33499e+10	7.32726e+10	8.01281e+10	7.97298e+10	7.6234e+10
Austria	Gross fixed capital formation (including Acquisitions less disposals of valuables)	7.251e+10	7.15855e+10	6.94886e+10	7.21256e+10	7.2799e+10	7.29687e+10	7.37908e+10	7.7182e+10	7.82794e+10	7.25419e+10	7.0789e+10	7.56337e+10	7.59984e+10	7.48684e+10
Austria	Changes in inventories	9.80966e+08	1.12055e+09	5.78518e+08	1.03061e+09	1.43231e+09	2.18549e+09	2.79239e+09	4.48054e+09	3.23091e+09	1.14893e+09	2.39276e+09	3.93751e+09	3.36785e+09	1.58464e+09
Austria	Exports of goods and services	1.19492e+11	1.26356e+11	1.31533e+11	1.32062e+11	1.43659e+11	1.53012e+11	1.64426e+11	1.76571e+11	1.80559e+11	1.53462e+11	1.73119e+11	1.84508e+11	1.8693e+11	1.89571e+11
Austria	Imports of goods and services	1.15215e+11	1.21184e+11	1.21538e+11	1.25801e+11	1.35859e+11	1.4326e+11	1.51659e+11	1.60179e+11	1.61651e+11	1.42223e+11	1.58336e+11	1.68468e+11	1.69718e+11	1.69212e+11
Austria	Gross Domestic Product (GDP)	2.8893e+11	2.92832e+11	2.97681e+11	2.99932e+11	3.08047e+11	3.14641e+11	3.25184e+11	3.36961e+11	3.42175e+11	3.29175e+11	3.35364e+11	3.45664e+11	3.48719e+11	3.49515e+11	7.95186e+08
Austria	Agriculture, hunting, forestry, fishing (ISIC A-B)	3.9497e+09	3.92934e+09	3.86803e+09	3.76806e+09	4.08282e+09	3.97851e+09	3.92793e+09	4.29544e+09	4.58951e+09	4.2767e+09	4.07469e+09	4.71678e+09	4.34277e+09	4.19157e+09
Austria	Mining, Manufacturing, Utilities (ISIC C-E)	5.88375e+10	6.14137e+10	6.0938e+10	6.12945e+10	6.37934e+10	6.51737e+10	6.87306e+10	7.24818e+10	7.24746e+10	6.35641e+10	6.72628e+10	7.16861e+10	7.33686e+10	7.43898e+10
Austria	Manufacturing (ISIC D)	5.02466e+10	5.16655e+10	5.08997e+10	5.11895e+10	5.27374e+10	5.50407e+10	5.93094e+10	6.39308e+10	6.45103e+10	5.50175e+10	5.9234e+10	6.44243e+10	6.51655e+10	6.56187e+10
Austria	Construction (ISIC F)	1.88484e+10	1.82441e+10	1.82295e+10	1.93266e+10	1.96495e+10	1.97015e+10	1.93671e+10	1.99845e+10	1.97323e+10	1.78571e+10	1.71294e+10	1.69987e+10	1.65298e+10	1.65877e+10
Austria	Wholesale, retail trade, restaurants and hotels (ISIC G-H)	4.47125e+10	4.54455e+10	4.65931e+10	4.64762e+10	4.67437e+10	4.78517e+10	4.9053e+10	5.02151e+10	5.00998e+10	5.01685e+10	5.11774e+10	5.26722e+10	5.28933e+10	5.23802e+10
Austria	Transport, storage and communication (ISIC I)	2.39576e+10	2.39624e+10	2.49199e+10	2.48991e+10	2.58714e+10	2.60451e+10	2.71119e+10	2.80798e+10	2.83463e+10	2.63845e+10	2.62109e+10	2.71748e+10	2.6752e+10	2.64872e+10
Austria	Other Activities (ISIC J-P)	1.05736e+11	1.06776e+11	1.09248e+11	1.10566e+11	1.1378e+11	1.16781e+11	1.211e+11	1.24717e+11	1.29631e+11	1.2927e+11	1.31344e+11	1.3424e+11	1.35919e+11	1.37106e+11
Austria	Total Value Added	2.56236e+11	2.5982e+11	2.63834e+11	2.66466e+11	2.73984e+11	2.79532e+11	2.89094e+11	2.99533e+11	3.04506e+11	2.91147e+11	2.96614e+11	3.06782e+11	3.08951e+11	3.10222e+11
Azerbaijan	Final consumption expenditure	4.30215e+09	4.65352e+09	5.11643e+09	5.7295e+09	6.27002e+09	6.95955e+09	7.83334e+09	8.98136e+09	1.03635e+10	1.11887e+10	1.228e+10	1.32324e+10	1.42584e+10	1.54015e+10
Azerbaijan	Household consumption expenditure (including Non-profit institutions serving households)	3.43361e+09	3.73871e+09	4.06869e+09	4.45047e+09	4.93514e+09	5.5791e+09	6.38742e+09	7.47882e+09	8.7877e+09	9.54e+09	1.05754e+10	1.14704e+10	1.24415e+10	1.35199e+10
Azerbaijan	General government final consumption expenditure	8.68548e+08	9.14818e+08	1.04774e+09	1.27903e+09	1.33488e+09	1.38044e+09	1.44592e+09	1.50255e+09	1.57582e+09	1.64865e+09	1.70465e+09	1.76209e+09	1.81691e+09	1.88158e+09
Azerbaijan	Gross capital formation	1.42737e+09	1.72141e+09	2.75421e+09	4.44805e+09	5.19986e+09	5.50146e+09	6.2992e+09	6.67721e+09	8.05945e+09	6.93116e+09	7.06976e+09	7.14047e+09	7.42613e+09	7.76033e+09
Azerbaijan	Gross fixed capital formation (including Acquisitions less disposals of valuables)	1.41959e+09	1.71204e+09	2.73924e+09	4.42386e+09	5.17156e+09	5.47153e+09	6.26493e+09	6.64087e+09	8.01554e+09	6.89335e+09	7.03121e+09	7.10158e+09	7.38567e+09	7.71804e+09
Azerbaijan	Changes in inventories	7.77361e+06	9.3719e+06	1.49674e+07	2.41837e+07	2.83001e+07	2.99338e+07	3.42704e+07	3.63469e+07	4.39044e+07	3.78158e+07	3.85516e+07	3.88962e+07	4.04656e+07	4.22934e+07
Azerbaijan	Exports of goods and services	2.60074e+09	3.4876e+09	3.26788e+09	3.90837e+09	5.45608e+09	8.33682e+09	1.23635e+10	1.68267e+10	1.80719e+10	2.06562e+10	2.25359e+10	2.29866e+10	2.18603e+10	2.23194e+10
Azerbaijan	Imports of goods and services	1.60888e+09	2.38114e+09	2.77165e+09	4.36811e+09	5.84889e+09	7.00693e+09	8.4153e+09	1.01068e+10	1.17744e+10	1.18333e+10	1.33006e+10	1.35001e+10	1.30816e+10	1.32255e+10
Azerbaijan	Gross Domestic Product (GDP)	7.14785e+09	7.85565e+09	8.5967e+09	9.47451e+09	1.03514e+10	1.32456e+10	1.78112e+10	2.2346e+10	2.47128e+10	2.70284e+10	2.82775e+10	2.7821e+10	2.84057e+10	3.01074e+10	1.70178e+09
Azerbaijan	Agriculture, hunting, forestry, fishing (ISIC A-B)	8.59873e+08	9.55342e+08	1.01648e+09	1.07349e+09	1.12712e+09	1.21163e+09	1.22252e+09	1.27139e+09	1.34913e+09	1.39631e+09	1.36468e+09	1.44475e+09	1.52853e+09	1.60341e+09
Azerbaijan	Mining, Manufacturing, Utilities (ISIC C-E)	3.27405e+09	3.57677e+09	3.7477e+09	3.96306e+09	4.11538e+09	6.54745e+09	1.03215e+10	1.39811e+10	1.49228e+10	1.69112e+10	1.72035e+10	1.56518e+10	1.49868e+10	1.51549e+10
Azerbaijan	Manufacturing (ISIC D)	5.20876e+08	5.42153e+08	5.86583e+08	6.68779e+08	7.38915e+08	8.593e+08	9.36735e+08	1.03237e+09	1.10557e+09	9.66461e+08	1.03194e+09	1.10821e+09	1.16703e+09	1.23484e+09
Azerbaijan	Construction (ISIC F)	3.12113e+08	3.30435e+08	6.00367e+08	8.87435e+08	1.21501e+09	1.23924e+09	1.34448e+09	1.55983e+09	2.12117e+09	1.94728e+09	2.34255e+09	2.81113e+09	3.3181e+09	4.08009e+09
Azerbaijan	Wholesale, retail trade, restaurants and hotels (ISIC G-H)	4.95876e+08	5.45088e+08	5.99238e+08	6.70732e+08	7.70464e+08	8.80031e+08	1.03719e+09	1.2155e+09	1.42903e+09	1.57075e+09	1.72442e+09	1.93023e+09	2.14217e+09	2.37569e+09
Azerbaijan	Transport, storage and communication (ISIC I)	5.62574e+08	6.27234e+08	6.78005e+08	7.56488e+08	8.38145e+08	9.8591e+08	1.28863e+09	1.5281e+09	1.79878e+09	1.98398e+09	2.2389e+09	2.33906e+09	2.56499e+09	2.77834e+09
Azerbaijan	Other Activities (ISIC J-P)	1.21116e+09	1.24963e+09	1.29944e+09	1.36692e+09	1.4327e+09	1.45671e+09	1.56437e+09	1.62676e+09	1.72692e+09	1.81237e+09	1.86641e+09	1.96677e+09	2.06291e+09	2.15576e+09
Azerbaijan	Total Value Added	6.71571e+09	7.28457e+09	7.9413e+09	8.71819e+09	9.49889e+09	1.2321e+10	1.67786e+10	2.11825e+10	2.33476e+10	2.56216e+10	2.67402e+10	2.61436e+10	2.66034e+10	2.8148e+10
Bahamas	Final consumption expenditure	5.56179e+09	5.62098e+09	5.78273e+09	5.66352e+09	5.56309e+09	5976152489	6.14179e+09	6.2058e+09	6.0687e+09	5.58152e+09	5.62791e+09	5.61117e+09	5.68735e+09	5.71303e+09
Bahamas	Household consumption expenditure (including Non-profit institutions serving households)	4.59696e+09	4.62865e+09	4.80422e+09	4.78774e+09	4.71554e+09	5102952489	5.25356e+09	5.31931e+09	5.11617e+09	4.58922e+09	4.63875e+09	4.54877e+09	4.66732e+09	4.65501e+09
Bahamas	General government final consumption expenditure	9.60972e+08	9.88004e+08	9.75127e+08	8.74562e+08	8.46673e+08	873200000	8.88466e+08	8.86999e+08	9.50868e+08	9.87826e+08	9.84935e+08	1.05626e+09	1.01525e+09	1.05237e+09
Bahamas	Gross capital formation	1.86794e+09	1.70718e+09	1.62746e+09	1.64599e+09	1.5623e+09	1948095522	2.37635e+09	2.31384e+09	2.099e+09	1.90128e+09	1.91297e+09	2.05983e+09	2.1722e+09	2.13334e+09
Bahamas	Gross fixed capital formation (including Acquisitions less disposals of valuables)	1.72715e+09	1.61183e+09	1.53855e+09	1.56512e+09	1.48437e+09	1863911853	2.29235e+09	2.23125e+09	2.01796e+09	1.8189e+09	1.82932e+09	1.94592e+09	2.10477e+09	2.04629e+09
Bahamas	Changes in inventories	1.40709e+08	9.53192e+07	8.88831e+07	8.08579e+07	7.79132e+07	84183669	8.40337e+07	8.26119e+07	8.1051e+07	8.23862e+07	8.36497e+07	1.13874e+08	6.7462e+07	8.70582e+07
Bahamas	Exports of goods and services	2.99242e+09	3.14787e+09	3.16428e+09	3.18565e+09	3.55828e+09	3482130924	3.54982e+09	3.49922e+09	3.42219e+09	3.3135e+09	3.35573e+09	3.56654e+09	3.8253e+09	3.66533e+09
Bahamas	Imports of goods and services	3.33118e+09	3.20538e+09	3.11655e+09	3.12716e+09	3.23786e+09	3700157863	4.15188e+09	3.99891e+09	3.76309e+09	3.30366e+09	3.29072e+09	3.53638e+09	3.88685e+09	3.67501e+09
Bahamas	Gross Domestic Product (GDP)	7.09914e+09	7.28553e+09	7.48258e+09	7.38794e+09	7.45317e+09	7706222073	7.90018e+09	8.01446e+09	7.82821e+09	7.50135e+09	7.61679e+09	7.69787e+09	7.77742e+09	7.82933e+09	5.19102e+07
Bahamas	Agriculture, hunting, forestry, fishing (ISIC A-B)	1.49221e+08	1.51665e+08	1.72212e+08	1.87979e+08	1.75153e+08	157767885	1.44862e+08	1.34238e+08	1.38193e+08	1.43344e+08	1.48612e+08	1.35957e+08	1.43621e+08	1.18989e+08
Bahamas	Mining, Manufacturing, Utilities (ISIC C-E)	5.03362e+08	4.78132e+08	4.65168e+08	5.49724e+08	5.93304e+08	577301871	6.21994e+08	5.70254e+08	5.84574e+08	5.58611e+08	5.84867e+08	5.80757e+08	5.62367e+08	5.78462e+08
Bahamas	Manufacturing (ISIC D)	3.01167e+08	2.61546e+08	2.43842e+08	3.13686e+08	3.43892e+08	324565168	3.5947e+08	3.14176e+08	2.91223e+08	2.73776e+08	2.98643e+08	2.9812e+08	2.97705e+08	3.11168e+08
Bahamas	Construction (ISIC F)	4.74637e+08	3.74195e+08	4.34166e+08	4.79641e+08	3.98385e+08	529959112	6.38319e+08	4.16598e+08	5.3611e+08	4.81527e+08	5.99886e+08	6.60222e+08	7.48278e+08	7.40953e+08
Bahamas	Wholesale, retail trade, restaurants and hotels (ISIC G-H)	1.60178e+09	1.69112e+09	1.6931e+09	1.6621e+09	1.71228e+09	1883803646	1.92728e+09	2.09537e+09	2.00421e+09	1.94844e+09	1.98847e+09	1.98136e+09	1.9673e+09	1.94398e+09
Bahamas	Transport, storage and communication (ISIC I)	6.32885e+08	5.91553e+08	6.36573e+08	6.43797e+08	6.66746e+08	7.01928e+08	7.21132e+08	6.40151e+08	5.928e+08	6.18617e+08	5.63754e+08	6.1004e+08	5.93612e+08	5.87382e+08
Bahamas	Other Activities (ISIC J-P)	3.4984e+09	3.71584e+09	3.79008e+09	3.64441e+09	3.74474e+09	3756222595	3.62384e+09	3.92513e+09	3.82442e+09	3.57803e+09	3.6859e+09	3.74852e+09	3.79037e+09	3.7887e+09
Bahamas	Total Value Added	6.86471e+09	7.01131e+09	7.20439e+09	7.17956e+09	7.29581e+09	7606983201	7.67085e+09	7.77864e+09	7.68158e+09	7.32783e+09	7.57638e+09	7.71773e+09	7.8117e+09	7.7586e+09
Bahrain	Final consumption expenditure	6.97721e+09	7.44721e+09	7.62557e+09	8.04424e+09	8.21005e+09	8.53544e+09	8.69501e+09	9.21027e+09	1.11119e+10	1.24077e+10	1.38255e+10	1.51298e+10	1.5911e+10	1.64861e+10
Bahrain	Household consumption expenditure (including Non-profit institutions serving households)	5.44757e+09	5.85307e+09	5.8936e+09	6.08719e+09	6.1757e+09	6.34491e+09	6.41981e+09	6.72934e+09	8.42389e+09	9.34685e+09	1.06744e+10	1.13808e+10	1.15095e+10	1.18207e+10
Bahrain	General government final consumption expenditure	1.54354e+09	1.61102e+09	1.74395e+09	1.96276e+09	2.03822e+09	2.19053e+09	2.27288e+09	2.47469e+09	2.69676e+09	3.06742e+09	3.17229e+09	3.7561e+09	4.38453e+09	4.64229e+09
Bahrain	Gross capital formation	2.5142e+09	2.50791e+09	2.49192e+09	2.96623e+09	3.37188e+09	4.32345e+09	5.35771e+09	6.93916e+09	8.24697e+09	5.82946e+09	6.93194e+09	4.46562e+09	5.4399e+09	4.93884e+09
Bahrain	Gross fixed capital formation (including Acquisitions less disposals of valuables)	2.28569e+09	2.06985e+09	2.81528e+09	3.24394e+09	3.13563e+09	4.10181e+09	5.0987e+09	7.02108e+09	8.3268e+09	5.8548e+09	6.71473e+09	4.35588e+09	5.55237e+09	4.79077e+09
Bahrain	Changes in inventories	2.06151e+08	3.68605e+08	-2.22127e+08	-1.8127e+08	2.22028e+08	2.21638e+08	2.62519e+08	1.62913e+07	3.29561e+07	4.74035e+07	2.48213e+08	1.36483e+08	-2.46537e+07	1.71655e+08
Bahrain	Exports of goods and services	1.09033e+10	1.06354e+10	1.2102e+10	1.22257e+10	1.27932e+10	1.33968e+10	1.36591e+10	1.37209e+10	1.3814e+10	1.38623e+10	1.42269e+10	1.40586e+10	1.36064e+10	1.48129e+10
Bahrain	Imports of goods and services	8.09568e+09	7.84297e+09	9.34117e+09	9.38093e+09	9.47341e+09	1.0287e+10	1.0558e+10	1.1027e+10	1.29895e+10	1.12794e+10	1.32314e+10	1.12764e+10	1.15408e+10	1.16785e+10
Bahrain	Gross Domestic Product (GDP)	1.24168e+10	1.27261e+10	1.31523e+10	1.39804e+10	1.49563e+10	1.59687e+10	1.70014e+10	1.84115e+10	1.95607e+10	2.00577e+10	2.09275e+10	2.1367e+10	2.21339e+10	2.33153e+10	1.18143e+09
Bahrain	Agriculture, hunting, forestry, fishing (ISIC A-B)	4.52171e+07	4.69565e+07	4.59249e+07	4.76007e+07	5.17836e+07	5.15655e+07	5.2487e+07	5.1383e+07	5.14603e+07	5.71951e+07	5.26722e+07	5.35161e+07	5.46381e+07	5.55167e+07
Bahrain	Mining, Manufacturing, Utilities (ISIC C-E)	5.83648e+09	5.92152e+09	6.04476e+09	6.15812e+09	5.75513e+09	5.64084e+09	5.81816e+09	6.05611e+09	6.24881e+09	6.35544e+09	6.50393e+09	6.71874e+09	6.53634e+09	7.15919e+09
Bahrain	Manufacturing (ISIC D)	1.41049e+09	1.46083e+09	1.52687e+09	1.58503e+09	1.75828e+09	2.0411e+09	2.26344e+09	2.38508e+09	2.54825e+09	2.66868e+09	2.7696e+09	2.85577e+09	2.98906e+09	3.08421e+09
Bahrain	Construction (ISIC F)	3.28398e+08	4.10004e+08	4.48282e+08	5.53178e+08	7.93878e+08	1.1286e+09	1.27858e+09	1.56766e+09	1.75994e+09	1.62851e+09	1.66729e+09	1.53592e+09	1.59874e+09	1.64205e+09
Bahrain	Wholesale, retail trade, restaurants and hotels (ISIC G-H)	6.2002e+08	6.7636e+08	7.62444e+08	8.51896e+08	1.11894e+09	1.29792e+09	1.40734e+09	1.51729e+09	1.66298e+09	1.69117e+09	1.78512e+09	1.65408e+09	1.78057e+09	1.83358e+09
Bahrain	Transport, storage and communication (ISIC I)	5.10714e+08	5.55594e+08	6.3205e+08	6.61103e+08	7.79258e+08	8.69979e+08	9.29089e+08	1.05246e+09	1.17663e+09	1.36122e+09	1.41425e+09	1.50264e+09	1.56731e+09	1.61598e+09
Bahrain	Other Activities (ISIC J-P)	4.4447e+09	4.47751e+09	4.5918e+09	5.14575e+09	6.15009e+09	6.82194e+09	7.42617e+09	8.144e+09	8.7018e+09	9.04248e+09	9.66221e+09	1.0048e+10	1.0895e+10	1.12362e+10
Bahrain	Total Value Added	1.23002e+10	1.26033e+10	1.30361e+10	1.38568e+10	1.48124e+10	1.58108e+10	1.68408e+10	1.82342e+10	1.93775e+10	1.98913e+10	2.07696e+10	2.12139e+10	2.1956e+10	2.31399e+10
Bangladesh	Final consumption expenditure	4.22748e+10	4.42741e+10	4.67389e+10	4.86307e+10	5.03933e+10	5.24699e+10	5.4789e+10	5.80243e+10	6.11397e+10	6.47719e+10	6.82225e+10	7.24351e+10	7.56692e+10	7.95103e+10
Bangladesh	Household consumption expenditure (including Non-profit institutions serving households)	4.02044e+10	4.2111e+10	4.41661e+10	4.57221e+10	4.71771e+10	4.90038e+10	5.11169e+10	5.41173e+10	5.70907e+10	6.04842e+10	6.35561e+10	6.73823e+10	7.04097e+10	7.40459e+10
Bangladesh	General government final consumption expenditure	2.06157e+09	2.15376e+09	2.56645e+09	2.90486e+09	3.21486e+09	3.46605e+09	3.67276e+09	3.90796e+09	4.04912e+09	4.28773e+09	4.66843e+09	5.05608e+09	5.2627e+09	5.46697e+09
Bangladesh	Gross capital formation	1.17042e+10	1.23796e+10	1.33901e+10	1.44434e+10	1.5767e+10	1.74546e+10	1.89013e+10	2.05018e+10	2.08718e+10	2.21628e+10	2.3921e+10	2.62105e+10	2.91475e+10	3.08473e+10
Bangladesh	Gross fixed capital formation (including Acquisitions less disposals of valuables)	1.17042e+10	1.23796e+10	1.33901e+10	1.44434e+10	1.5767e+10	1.74546e+10	1.89013e+10	2.05018e+10	2.08718e+10	2.21628e+10	2.3921e+10	2.62105e+10	2.91475e+10	3.08473e+10
Bangladesh	Exports of goods and services	6.1221e+09	7.03479e+09	6.87292e+09	7.34508e+09	8.26591e+09	9.5555e+09	1.20228e+10	1.35835e+10	1.45395e+10	1.4543e+10	1.46795e+10	1.89866e+10	2.04636e+10	2.11781e+10
Bangladesh	Imports of goods and services	9.5105e+09	1.05772e+10	9.39052e+09	1.00858e+10	1.11549e+10	1.32808e+10	1.56964e+10	1.82064e+10	1.7832e+10	1.73681e+10	1.74866e+10	2.25855e+10	2.42716e+10	2.44203e+10
Bangladesh	Gross Domestic Product (GDP)	5.08456e+10	5.3527e+10	5.58905e+10	5.88281e+10	6.2517e+10	6.62402e+10	7.06315e+10	7.53426e+10	8.00066e+10	8.45999e+10	8.97346e+10	9.55354e+10	1.01766e+11	1.07886e+11	6.11979e+09
Bangladesh	Agriculture, hunting, forestry, fishing (ISIC A-B)	1.06942e+10	1.10298e+10	1.10305e+10	1.13699e+10	1.18348e+10	1.20959e+10	1.26932e+10	1.40114e+10	1.44605e+10	1.50558e+10	1.58451e+10	1.65512e+10	1.70501e+10	1.74704e+10
Bangladesh	Mining, Manufacturing, Utilities (ISIC C-E)	8.30991e+09	8.89032e+09	9.38402e+09	1.00291e+10	1.07598e+10	1.16484e+10	1.28612e+10	1.40426e+10	1.507e+10	1.6106e+10	1.71901e+10	1.88578e+10	2.06986e+10	2.2799e+10
Bangladesh	Manufacturing (ISIC D)	7.02936e+09	7.49918e+09	7.91041e+09	8.44424e+09	9.04338e+09	9.78414e+09	1.08375e+10	1.20203e+10	1.28872e+10	1.37475e+10	1.46406e+10	1.61066e+10	1.771e+10	1.95354e+10
Bangladesh	Construction (ISIC F)	2.68511e+09	2.91732e+09	3.16863e+09	3.42502e+09	3.70772e+09	4.01568e+09	4.34957e+09	4.85786e+09	5.13365e+09	5.42609e+09	5.75222e+09	6.15219e+09	6.67049e+09	7.20697e+09
Bangladesh	Wholesale, retail trade, restaurants and hotels (ISIC G-H)	6.43357e+09	6.84893e+09	7.30143e+09	7.74894e+09	8.26009e+09	8.84378e+09	9.44371e+09	1.04139e+10	1.11276e+10	1.18255e+10	1.25299e+10	1.33646e+10	1.42582e+10	1.51419e+10
Bangladesh	Transport, storage and communication (ISIC I)	4.73023e+09	5.10506e+09	5.43973e+09	5.81231e+09	6.17317e+09	6.66224e+09	7.19414e+09	7.54149e+09	8.18593e+09	8.84171e+09	9.52172e+09	1.03256e+10	1.12704e+10	1.19775e+10
Bangladesh	Other Activities (ISIC J-P)	1.55725e+10	1.62197e+10	1.69263e+10	1.76715e+10	1.85403e+10	1.95309e+10	2.0615e+10	2.09219e+10	2.20557e+10	2.32979e+10	2.47568e+10	2.60302e+10	2.7464e+10	2.87957e+10
Bangladesh	Total Value Added	4.84196e+10	5.10052e+10	5.32473e+10	5.60538e+10	5.92736e+10	6.27969e+10	6.71574e+10	7.17854e+10	7.60319e+10	8.05525e+10	8.55955e+10	9.12823e+10	9.74144e+10	1.03398e+11
Barbados	Final consumption expenditure	3.19573e+09	3.01231e+09	3.01503e+09	2.9668e+09	3.26185e+09	3446250000	3.46851e+09	3.46851e+09	3.33455e+09	3.18276e+09	2.98636e+09	2.89872e+09	2.69347e+09	2.67922e+09
Barbados	Household consumption expenditure (including Non-profit institutions serving households)	2.55286e+09	2.2535e+09	2.51252e+09	2.31012e+09	2.62023e+09	2808500000	2.89184e+09	2.79244e+09	2.6427e+09	2.47912e+09	2.36321e+09	2.29701e+09	2.23855e+09	2.09793e+09
Barbados	General government final consumption expenditure	6.48135e+08	7.79402e+08	4.96839e+08	6.67694e+08	6.45498e+08	6.3775e+08	5.70009e+08	6.79568e+08	6.99499e+08	7.15362e+08	6.30365e+08	6.08391e+08	4.5047e+08	5.90031e+08
Barbados	Gross capital formation	6.37906e+08	6.29359e+08	6.1724e+08	6.61279e+08	7.06423e+08	722600000	7.70451e+08	7.7274e+08	7.72862e+08	6.05363e+08	5.49025e+08	6.03295e+08	5.79764e+08	5.64033e+08
Barbados	Gross fixed capital formation (including Acquisitions less disposals of valuables)	6.47521e+08	6.55108e+08	6.26146e+08	6.6455e+08	7.01519e+08	717750000	7.65636e+08	7.6741e+08	7.66533e+08	5.97784e+08	5.41243e+08	5.94403e+08	5.70376e+08	5.63885e+08
Barbados	Changes in inventories	2.16311e+06	-345155	2.15362e+06	3.26308e+06	4.76625e+06	4850000	5.11688e+06	5.20834e+06	5.36131e+06	4.59903e+06	4.30968e+06	4.78758e+06	4.7293e+06	3.23124e+06
Barbados	Exports of goods and services	1.62061e+09	1.5689e+09	1.48245e+09	1.48809e+09	1.46936e+09	1711700000	1.88329e+09	1.87362e+09	1.78948e+09	1.75185e+09	1.83532e+09	1.4367e+09	1.49901e+09	1.47082e+09
Barbados	Imports of goods and services	2.09886e+09	1.99879e+09	1.95333e+09	1.88612e+09	1.92771e+09	2016750000	1.96447e+09	1.885e+09	1.79924e+09	1.77124e+09	1.76185e+09	1.61793e+09	1.5878e+09	1.58029e+09
Barbados	Gross Domestic Product (GDP)	3.68856e+09	3.59266e+09	3.61781e+09	3.69016e+09	3.74183e+09	3891500000	4.11332e+09	4.18324e+09	4.19579e+09	4.02376e+09	4.03584e+09	4.06812e+09	4.06812e+09	4.05592e+09	-1.22044e+07
Barbados	Agriculture, hunting, forestry, fishing (ISIC A-B)	7.36679e+07	6.66863e+07	6.39177e+07	6.03066e+07	5.60935e+07	60600000	5.71609e+07	5.84654e+07	5.84654e+07	6.01256e+07	5.64493e+07	5.28916e+07	5.11127e+07	5.34742e+07
Barbados	Mining, Manufacturing, Utilities (ISIC C-E)	3.68522e+08	3.46519e+08	3.4812e+08	3.4782e+08	3.53424e+08	359150000	3.646e+08	3.62204e+08	3.555e+08	3.22043e+08	3.1406e+08	3.00424e+08	2.8618e+08	3.00156e+08
Barbados	Manufacturing (ISIC D)	2.83292e+08	2.60193e+08	2.60834e+08	2.58909e+08	2.62438e+08	267950000	2.66254e+08	2.63286e+08	2.57351e+08	2.25977e+08	2.16225e+08	2.04778e+08	1.90787e+08	2.03893e+08
Barbados	Construction (ISIC F)	1.54813e+08	1.65387e+08	1.78077e+08	1.79346e+08	1.85691e+08	211700000	2.10847e+08	2.10847e+08	1.99974e+08	1.63519e+08	1.47955e+08	1.63519e+08	1.51367e+08	1.54211e+08
Barbados	Wholesale, retail trade, restaurants and hotels (ISIC G-H)	8.00613e+08	7.65513e+08	7.61125e+08	8.02692e+08	8.50724e+08	859750000	9.55027e+08	9.44496e+08	9.41237e+08	9.0112e+08	9.25942e+08	9.25692e+08	9.16164e+08	9.22293e+08
Barbados	Transport, storage and communication (ISIC I)	3.18913e+08	3.20844e+08	3.11578e+08	3.19686e+08	3.35515e+08	351750000	3.72623e+08	3.95042e+08	4.07025e+08	3.95815e+08	3.96588e+08	3.99294e+08	4.07798e+08	4.01078e+08
Barbados	Other Activities (ISIC J-P)	1.39797e+09	1.38161e+09	1.40358e+09	1.41246e+09	1.45873e+09	1524300000	1.60047e+09	1.67986e+09	1.72125e+09	1.7058e+09	1.72366e+09	1.75427e+09	1.80994e+09	1.76192e+09
Barbados	Total Value Added	3.12687e+09	3.04596e+09	3.06654e+09	3.12565e+09	3.24058e+09	3367250000	3.55774e+09	3.61915e+09	3.62946e+09	3.4645e+09	3.46896e+09	3.49234e+09	3.48805e+09	3.48189e+09
Belarus	Final consumption expenditure	1.5661e+10	1.72963e+10	1.83563e+10	1.91255e+10	2.01516e+10	2.19848e+10	2.37577e+10	2.58425e+10	2.89092e+10	2.8904e+10	3.11036e+10	3.13268e+10	3.37412e+10	3.66613e+10
Belarus	Household consumption expenditure (including Non-profit institutions serving households)	8.98951e+09	1.05373e+10	1.16897e+10	1.2525e+10	1.3701e+10	1.57056e+10	1.7703e+10	2.00802e+10	2.34821e+10	2.34833e+10	2.56676e+10	2.62352e+10	2.90164e+10	3.25053e+10
Belarus	General government final consumption expenditure	6.02489e+09	6.22401e+09	6.24789e+09	6.26585e+09	6.24621e+09	6.27926e+09	6.26972e+09	6.23845e+09	6.25938e+09	6.25448e+09	6.45006e+09	6.22571e+09	6.16958e+09	6.01341e+09
Belarus	Gross capital formation	4.47119e+09	4.5558e+09	4.67415e+09	5.88256e+09	7.59031e+09	8.59793e+09	1.13762e+10	1.32406e+10	1.69597e+10	1.63505e+10	1.93527e+10	2.07896e+10	1.96511e+10	2.11428e+10
Belarus	Gross fixed capital formation (including Acquisitions less disposals of valuables)	4.44556e+09	4.34455e+09	4.63337e+09	5.58957e+09	6.70446e+09	8.0107e+09	1.05421e+10	1.22757e+10	1.5197e+10	1.59609e+10	1.87602e+10	2.13609e+10	1.89531e+10	2.03798e+10
Belarus	Changes in inventories	7.36489e+07	2.28399e+08	8.85718e+07	3.11663e+08	8.22789e+08	5.87236e+08	8.24339e+08	9.54492e+08	1.65899e+09	5.14448e+08	7.17665e+08	-2.29527e+08	8.08519e+08	8.79901e+08
Belarus	Exports of goods and services	1.21456e+10	1.37348e+10	1.49609e+10	1.61728e+10	1.83593e+10	1.8065e+10	1.95413e+10	2.06356e+10	2.12508e+10	1.9742e+10	2.12561e+10	2.77089e+10	3.08118e+10	2.61949e+10
Belarus	Imports of goods and services	1.08576e+10	1.22455e+10	1.34318e+10	1.52179e+10	1.82653e+10	1.78501e+10	2.17036e+10	2.32856e+10	2.66856e+10	2.36968e+10	2.65939e+10	3.15216e+10	3.49637e+10	3.31387e+10
Belarus	Gross Domestic Product (GDP)	2.10543e+10	2.20492e+10	2.31535e+10	2.47731e+10	2.76039e+10	3.02101e+10	3.32305e+10	3.60811e+10	3.97773e+10	3.98386e+10	4.29225e+10	4.5302e+10	4.60927e+10	4.64872e+10	3.94463e+08
Belarus	Agriculture, hunting, forestry, fishing (ISIC A-B)	2.01704e+09	2.04156e+09	2.07314e+09	2.21261e+09	2.5097e+09	2.57345e+09	2.72604e+09	2.85951e+09	3.104e+09	3.11273e+09	3.18684e+09	3.40437e+09	3.62204e+09	3.47209e+09
Belarus	Mining, Manufacturing, Utilities (ISIC C-E)	5.97808e+09	6.31664e+09	6.6532e+09	7.20131e+09	8.44259e+09	9.4107e+09	1.04706e+10	1.11481e+10	1.25954e+10	1.22357e+10	1.35871e+10	1.4602e+10	1.53669e+10	1.47126e+10
Belarus	Manufacturing (ISIC D)	4.42565e+09	4.74711e+09	5.072e+09	5.57106e+09	6.69227e+09	7.65587e+09	8.69812e+09	9.42274e+09	1.08077e+10	1.05717e+10	1.17135e+10	1.28515e+10	1.36339e+10	1.29452e+10
Belarus	Construction (ISIC F)	1.26117e+09	1.19375e+09	1.31758e+09	1.47338e+09	1.70055e+09	2.02042e+09	2.53177e+09	3.02311e+09	3.75237e+09	4.17568e+09	4.81632e+09	5.09799e+09	4.59178e+09	4.87122e+09
Belarus	Wholesale, retail trade, restaurants and hotels (ISIC G-H)	1.82445e+09	2.12915e+09	2.2694e+09	2.47447e+09	2.75007e+09	3.15745e+09	3.69541e+09	3.99889e+09	4.61666e+09	4.51483e+09	5.06713e+09	5.99904e+09	5.73703e+09	6.34108e+09
Belarus	Transport, storage and communication (ISIC I)	1.91928e+09	1.98738e+09	2.04554e+09	2.15254e+09	2.3339e+09	2.43812e+09	2.62006e+09	2.80116e+09	3.00732e+09	2.9239e+09	3.20498e+09	3.53784e+09	3.76871e+09	3.7251e+09
Belarus	Other Activities (ISIC J-P)	6.01287e+09	6.20046e+09	6.26878e+09	6.33005e+09	6.35436e+09	6.71505e+09	7.0003e+09	7.2663e+09	7.39569e+09	7.93387e+09	8.22996e+09	8.54175e+09	8.93762e+09	8.91468e+09
Belarus	Total Value Added	1.91822e+10	2.0099e+10	2.08277e+10	2.20046e+10	2.41472e+10	2.63152e+10	2.89506e+10	3.09022e+10	3.40969e+10	3.44966e+10	3.75277e+10	4.06588e+10	4.1551e+10	4.16569e+10
Belgium	Final consumption expenditure	2.64559e+11	2.67937e+11	2.70959e+11	2.73389e+11	2.77651e+11	2.80683e+11	2.84607e+11	2.89756e+11	2.95938e+11	2.97823e+11	3.04531e+11	3.06531e+11	3.09604e+11	3.11395e+11
Belgium	Household consumption expenditure (including Non-profit institutions serving households)	1.85125e+11	1.87332e+11	1.88172e+11	1.89373e+11	1.92265e+11	1.94722e+11	1.97652e+11	2.01246e+11	2.04792e+11	2.05288e+11	2.10973e+11	2.12219e+11	2.13909e+11	2.14641e+11
Belgium	General government final consumption expenditure	7.9508e+10	8.06727e+10	8.27967e+10	8.40023e+10	8.53696e+10	8.59614e+10	8.69645e+10	8.85207e+10	9.11219e+10	9.24737e+10	9.35439e+10	9.42916e+10	9.56534e+10	9.6689e+10
Belgium	Gross capital formation	8.31957e+10	8.06109e+10	7.70716e+10	7.75473e+10	8.50394e+10	9.16498e+10	9.57506e+10	1.0243e+11	1.05487e+11	9.41527e+10	9.54799e+10	1.01619e+11	9.86462e+10	9.43997e+10
Belgium	Gross fixed capital formation (including Acquisitions less disposals of valuables)	7.59276e+10	7.7316e+10	7.44393e+10	7.46112e+10	8.07934e+10	8.60297e+10	8.90137e+10	9.46503e+10	9.73493e+10	9.02691e+10	9.01475e+10	9.37557e+10	9.37457e+10	9.17089e+10
Belgium	Changes in inventories	8.92892e+09	2.0314e+09	1.02722e+09	1.54166e+09	3.50339e+09	5.62006e+09	7.40027e+09	8.92874e+09	9.41791e+09	2.43474e+09	4.9319e+09	9.11415e+09	4.02006e+09	3.16024e+08
Belgium	Exports of goods and services	2.43387e+11	2.4402e+11	2.51918e+11	2.56001e+11	2.72384e+11	2.85367e+11	3.00094e+11	3.16793e+11	3.21887e+11	2.91315e+11	3.20475e+11	3.41546e+11	3.48137e+11	3.58104e+11
Belgium	Imports of goods and services	2.35758e+11	2.33899e+11	2.35779e+11	2.39525e+11	2.55138e+11	2.70755e+11	2.83342e+11	2.99893e+11	3.1025e+11	2.81708e+11	3.08892e+11	3.31111e+11	3.37343e+11	3.43559e+11
Belgium	Gross Domestic Product (GDP)	3.55035e+11	3.58317e+11	3.63905e+11	3.67143e+11	3.79753e+11	3.86945e+11	3.97123e+11	4.09038e+11	4.12937e+11	4.02124e+11	4.12182e+11	4.18934e+11	4.19331e+11	4.20483e+11	1.15251e+09
Belgium	Agriculture, hunting, forestry, fishing (ISIC A-B)	3.19602e+09	2.97033e+09	3.24648e+09	3.14508e+09	3.34358e+09	3.24168e+09	3.52731e+09	3.50195e+09	3.55081e+09	3.35071e+09	3.58293e+09	3.49026e+09	3.33311e+09	3.44289e+09
Belgium	Mining, Manufacturing, Utilities (ISIC C-E)	6.59994e+10	6.67127e+10	6.70402e+10	6.68919e+10	6.94564e+10	7.01222e+10	7.14479e+10	7.43899e+10	7.43768e+10	6.86571e+10	7.22442e+10	7.16266e+10	7.15651e+10	7.11184e+10
Belgium	Manufacturing (ISIC D)	5.64477e+10	5.73164e+10	5.77156e+10	5.74744e+10	6.00642e+10	6.10699e+10	6.20875e+10	6.48322e+10	6.48085e+10	5.72133e+10	6.02554e+10	5.98267e+10	6.13015e+10	6.12501e+10
Belgium	Construction (ISIC F)	1.50135e+10	1.51361e+10	1.5018e+10	1.52676e+10	1.62832e+10	1.70134e+10	1.87012e+10	1.90286e+10	1.92426e+10	1.89509e+10	1.91355e+10	2.06435e+10	2.10266e+10	2.07506e+10
Belgium	Wholesale, retail trade, restaurants and hotels (ISIC G-H)	4.84933e+10	5.02594e+10	5.26494e+10	5.50872e+10	5.70047e+10	5.58053e+10	5.64059e+10	6.01714e+10	6.0181e+10	5.77947e+10	5.87166e+10	5.96036e+10	5.92833e+10	5.86677e+10
Belgium	Transport, storage and communication (ISIC I)	2.83756e+10	2.94733e+10	3.002e+10	3.08236e+10	3.06081e+10	3.18625e+10	3.19166e+10	3.22775e+10	3.35561e+10	3.19709e+10	3.22359e+10	3.29757e+10	3.21656e+10	3.21655e+10
Belgium	Other Activities (ISIC J-P)	1.55916e+11	1.5711e+11	1.58344e+11	1.58837e+11	1.62895e+11	1.6785e+11	1.72712e+11	1.75913e+11	1.79665e+11	1.79704e+11	1.83064e+11	1.87432e+11	1.88318e+11	1.90819e+11
Belgium	Total Value Added	3.16957e+11	3.21608e+11	3.26188e+11	3.29913e+11	3.39338e+11	3.45895e+11	3.54798e+11	3.65146e+11	3.70626e+11	3.6106e+11	3.6939e+11	3.76467e+11	3.76455e+11	3.77877e+11
Belize	Final consumption expenditure	7.99945e+08	8.73306e+08	9.39941e+08	9.76975e+08	9.73649e+08	962805878	9.42669e+08	9.84429e+08	9.74839e+08	1.01261e+09	1.06706e+09	1.10538e+09	1.14657e+09	1.20153e+09
Belize	Household consumption expenditure (including Non-profit institutions serving households)	6.75794e+08	7.41383e+08	7.91078e+08	8.20334e+08	8.18385e+08	801804262	7.82209e+08	8.08327e+08	7.92936e+08	8.25075e+08	8.72201e+08	9.12878e+08	9.45867e+08	9.99034e+08
Belize	General government final consumption expenditure	1.23667e+08	1.31213e+08	1.48444e+08	1.56302e+08	1.54884e+08	161001616	1.60602e+08	1.7668e+08	1.82854e+08	1.88446e+08	1.95689e+08	1.9289e+08	2.01152e+08	2.02576e+08
Belize	Gross capital formation	2.85238e+08	2.38359e+08	2.39478e+08	2.13553e+08	2.11531e+08	2.33087e+08	2.16202e+08	2.21287e+08	2.96225e+08	2.21948e+08	1.41203e+08	1.96054e+08	1.86278e+08	2.24899e+08
Belize	Gross fixed capital formation (including Acquisitions less disposals of valuables)	2.64505e+08	2.47983e+08	2.34729e+08	2.01841e+08	1.90961e+08	2.06317e+08	2.09997e+08	2.16844e+08	2.77904e+08	2.25585e+08	1.77741e+08	1.76857e+08	1.93431e+08	2.26751e+08
Belize	Changes in inventories	2.29406e+07	-2.83272e+06	8.92589e+06	1.40643e+07	2.12543e+07	26770619	9.62393e+06	8.29222e+06	2.12032e+07	1.70979e+06	-2.68544e+07	1.98062e+07	-1.91305e+06	3.22902e+06
Belize	Exports of goods and services	4.00506e+08	4.20226e+08	4.60627e+08	5.21311e+08	5.51079e+08	6.09027e+08	6.85838e+08	6.48575e+08	6.74588e+08	6.08708e+08	6.94005e+08	6.97352e+08	7.5772e+08	7.56173e+08
Belize	Imports of goods and services	6.80842e+08	6.75403e+08	6.93088e+08	7.07734e+08	6.54958e+08	698550143	7.0178e+08	7.04282e+08	7.97175e+08	6.26994e+08	6.91724e+08	7.73102e+08	8.07793e+08	8.85756e+08
Belize	Gross Domestic Product (GDP)	8.60021e+08	9.03156e+08	9.49409e+08	1.03796e+09	1.0862e+09	1.1142e+09	1.16525e+09	1.17813e+09	1.21618e+09	1.22485e+09	1.26556e+09	1.29219e+09	1.34161e+09	1.36208e+09	2.04687e+07
Belize	Agriculture, hunting, forestry, fishing (ISIC A-B)	9.44947e+07	9.41225e+07	9.46328e+07	1.31381e+08	1.43816e+08	148274275	1.38698e+08	1.10049e+08	1.20932e+08	1.23932e+08	1.32431e+08	1.26679e+08	1.35326e+08	1.42929e+08
Belize	Mining, Manufacturing, Utilities (ISIC C-E)	1.11709e+08	1.12014e+08	1.13832e+08	1.1612e+08	1.25687e+08	125627212	1.66162e+08	1.71689e+08	1.79874e+08	2.19392e+08	2.17715e+08	2.1187e+08	1.97173e+08	1.76708e+08
Belize	Manufacturing (ISIC D)	7.52701e+07	7.53026e+07	7.65471e+07	7.63299e+07	8.57808e+07	86132491	1.12373e+08	1.16015e+08	1.21087e+08	1.5511e+08	1.42408e+08	1.38714e+08	1.28218e+08	1.0336e+08
Belize	Construction (ISIC F)	4.73523e+07	4.79774e+07	4.97472e+07	4.08543e+07	4.27174e+07	4.11693e+07	4.03521e+07	3.91065e+07	4.51671e+07	4.06179e+07	3.05867e+07	2.97888e+07	3.42836e+07	3.57206e+07
Belize	Wholesale, retail trade, restaurants and hotels (ISIC G-H)	1.72899e+08	1.87523e+08	1.94531e+08	2.01939e+08	2.05347e+08	2.15351e+08	2.17057e+08	2.22197e+08	2.26504e+08	2.09652e+08	2.29121e+08	2.41972e+08	2.58004e+08	2.7402e+08
Belize	Transport, storage and communication (ISIC I)	8.03011e+07	8.97905e+07	9.99129e+07	1.08512e+08	1.13909e+08	1.23976e+08	1.28287e+08	1.46251e+08	1.40567e+08	1.38817e+08	1.45415e+08	1.47414e+08	1.5491e+08	1.61861e+08
Belize	Other Activities (ISIC J-P)	2.59478e+08	2.72554e+08	2.99797e+08	3.32799e+08	3.45395e+08	3.55683e+08	3.67703e+08	3.8977e+08	3.99762e+08	4.29148e+08	4.36763e+08	4.36797e+08	4.43947e+08	4.33754e+08
Belize	Total Value Added	7.61237e+08	7.96424e+08	8.41557e+08	9.29703e+08	9.77385e+08	1010080868	1.05515e+09	1.06349e+09	1.09994e+09	1.14967e+09	1.18205e+09	1.18206e+09	1.21123e+09	1.21388e+09
Benin	Final consumption expenditure	3.24328e+09	3.40572e+09	3.58998e+09	3.77772e+09	3.77416e+09	3.87054e+09	3.97707e+09	4.09032e+09	4.24568e+09	4.38248e+09	4.51412e+09	4.6551e+09	4.87019e+09	5.10085e+09
Benin	Household consumption expenditure (including Non-profit institutions serving households)	2.79016e+09	2.9382e+09	3.10275e+09	3.25569e+09	3.26906e+09	3.3476e+09	3.43553e+09	3.52616e+09	3.65346e+09	3.76288e+09	3.87649e+09	4.00059e+09	4.18773e+09	4.38996e+09
Benin	General government final consumption expenditure	4.52543e+08	4.67237e+08	4.87148e+08	5.2159e+08	5.05286e+08	5.2294e+08	5.4138e+08	5.63718e+08	5.91504e+08	6.18549e+08	6.36571e+08	6.53529e+08	6.81517e+08	7.10068e+08
Benin	Gross capital formation	6.61878e+08	7.7789e+08	7.48978e+08	8.6619e+08	9.42887e+08	7.91266e+08	1.0103e+09	1.05512e+09	1.08934e+09	1.13428e+09	1.08791e+09	1.14242e+09	1.26854e+09	1.79402e+09
Benin	Gross fixed capital formation (including Acquisitions less disposals of valuables)	6.33788e+08	6.81322e+08	7.32421e+08	7.98339e+08	8.11112e+08	8.43557e+08	8.85735e+08	9.38879e+08	1.01681e+09	1.04375e+09	9.8217e+08	1.03549e+09	1.08274e+09	1.56966e+09
Benin	Changes in inventories	-3.06019e+06	3.23964e+07	-1.20878e+07	1.36026e+07	4.76066e+07	-5.22904e+07	4.15931e+07	3.55943e+07	9.85721e+06	1.87644e+07	2.87036e+07	2.78204e+07	6.88697e+07	7.56469e+07
Benin	Exports of goods and services	7.7083e+08	7.94282e+08	8.26054e+08	8.41749e+08	8.29122e+08	9.40225e+08	8.93214e+08	1.01201e+09	1.12333e+09	1.06717e+09	1.09865e+09	1.08107e+09	1.18495e+09	1.32655e+09
Benin	Imports of goods and services	1.09112e+09	1.14069e+09	1.17491e+09	1.2924e+09	1.21485e+09	1.24401e+09	1.26889e+09	1.3704e+09	1.46633e+09	1.42234e+09	1.43372e+09	1.41938e+09	1.56132e+09	1.99068e+09
Benin	Gross Domestic Product (GDP)	3.56471e+09	3.78744e+09	3.95489e+09	4.10844e+09	4.23662e+09	4.35801e+09	4.52155e+09	4.73071e+09	4.96812e+09	5.10016e+09	5.23034e+09	5.40426e+09	5.69567e+09	6.01718e+09	3.2151e+08
Benin	Agriculture, hunting, forestry, fishing (ISIC A-B)	1.19783e+09	1.27424e+09	1.30565e+09	1.33493e+09	1.41886e+09	1.40715e+09	1.48527e+09	1.54808e+09	1.60328e+09	1.64395e+09	1.66703e+09	1.75568e+09	1.86861e+09	1.98715e+09
Benin	Mining, Manufacturing, Utilities (ISIC C-E)	3.24286e+08	3.56226e+08	3.83023e+08	3.89725e+08	3.8319e+08	4.0434e+08	3.93714e+08	4.02077e+08	4.14107e+08	4.27719e+08	4.47769e+08	4.55528e+08	4.71166e+08	4.93723e+08
Benin	Manufacturing (ISIC D)	2.8375e+08	3.09579e+08	3.2907e+08	3.3135e+08	3.24512e+08	3.418e+08	3.29642e+08	3.38328e+08	3.49342e+08	3.58296e+08	3.73323e+08	3.77649e+08	3.88861e+08	4.07521e+08
Benin	Construction (ISIC F)	1.34077e+08	1.43329e+08	1.5094e+08	1.62184e+08	1.67794e+08	1.76124e+08	1.867e+08	2.00168e+08	2.16594e+08	2.23108e+08	2.23067e+08	2.36462e+08	2.4574e+08	2.541e+08
Benin	Wholesale, retail trade, restaurants and hotels (ISIC G-H)	5.95055e+08	6.26598e+08	6.51501e+08	6.9051e+08	6.85186e+08	7.32884e+08	7.55125e+08	7.99104e+08	8.66162e+08	8.65598e+08	8.78221e+08	8.85534e+08	9.34726e+08	9.94492e+08
Benin	Transport, storage and communication (ISIC I)	2.65474e+08	2.81584e+08	2.95018e+08	3.16924e+08	3.14393e+08	3.32395e+08	3.45547e+08	3.66311e+08	3.9198e+08	4.25541e+08	4.38718e+08	4.53346e+08	4.83411e+08	5.11401e+08
Benin	Other Activities (ISIC J-P)	7.60401e+08	7.96542e+08	8.33878e+08	8.8062e+08	8.99548e+08	9.40438e+08	9.801e+08	1.02922e+09	1.08528e+09	1.13149e+09	1.16983e+09	1.20202e+09	1.25652e+09	1.31402e+09
Benin	Total Value Added	3.28679e+09	3.49221e+09	3.63287e+09	3.77719e+09	3.8827e+09	3.99333e+09	4.14555e+09	4.33748e+09	4.55657e+09	4.69372e+09	4.80139e+09	4.97117e+09	5.24134e+09	5.53535e+09
Bermuda	Final consumption expenditure	2.77381e+09	2.9611e+09	3.29274e+09	3.49311e+09	4.34413e+09	4662964776	4.82276e+09	3.72499e+09	3.78853e+09	3.57357e+09	3.50921e+09	3.41369e+09	3.2281e+09	3.10878e+09
Bermuda	Household consumption expenditure (including Non-profit institutions serving households)	2.3089e+09	2.32188e+09	2.60999e+09	2.73729e+09	3.39841e+09	3660514955	3.82296e+09	2.92432e+09	2.96392e+09	2.83235e+09	2.73813e+09	2.64306e+09	2.50028e+09	2.43903e+09
Bermuda	General government final consumption expenditure	4.6491e+08	6.39217e+08	6.82744e+08	7.55822e+08	9.45724e+08	1002449820	9.998e+08	8.00667e+08	8.24611e+08	7.41218e+08	7.7109e+08	7.70633e+08	7.27815e+08	6.69743e+08
Bermuda	Gross capital formation	8.59845e+08	8.34158e+08	7.17153e+08	6.68832e+08	9.44222e+08	1001874942	9.93325e+08	7.44174e+08	7.3637e+08	7.75105e+08	6.60175e+08	6.08489e+08	5.14638e+08	5.23907e+08
Bermuda	Gross fixed capital formation (including Acquisitions less disposals of valuables)	8.34282e+08	7.91129e+08	6.68661e+08	6.12481e+08	8.67478e+08	954550901	9.46378e+08	7.44174e+08	7.3637e+08	7.75105e+08	6.60175e+08	6.08489e+08	5.14638e+08	5.23907e+08
Bermuda	Changes in inventories	2.55621e+07	4.30284e+07	4.84913e+07	5.63506e+07	7.67445e+07	47324041	4.6947e+07
Bermuda	Exports of goods and services	2.00598e+09	2.05737e+09	2.35946e+09	2.5966e+09	2.05171e+09	1811395780	2.23099e+09	2.47728e+09	2.52528e+09	2.36232e+09	2.34242e+09	2.29084e+09	2.14001e+09	2.12673e+09
Bermuda	Imports of goods and services	1.75164e+09	1.88671e+09	2.01067e+09	2.07915e+09	2.55207e+09	2608120344	2.90909e+09	1.59485e+09	1.60127e+09	1.55041e+09	1.50178e+09	1.38704e+09	1.31138e+09	1.32028e+09
Bermuda	Gross Domestic Product (GDP)	4.28357e+09	4.59289e+09	4.52502e+09	4.67935e+09	4.78798e+09	4868135685	5.13802e+09	5.28424e+09	5.36498e+09	5.08148e+09	4.97507e+09	4.80893e+09	4.57644e+09	4.46152e+09	-1.14921e+08
Bermuda	Agriculture, hunting, forestry, fishing (ISIC A-B)	3.15324e+07	3.09542e+07	3.31317e+07	3.48922e+07	3.85338e+07	39025088	4.24442e+07	4.41745e+07	4.6569e+07	4.42312e+07	4.38232e+07	4.20548e+07	3.90123e+07	3.94523e+07
Bermuda	Mining, Manufacturing, Utilities (ISIC C-E)	1.80653e+08	1.78811e+08	1.82301e+08	1.69696e+08	1.64496e+08	160198780	1.60298e+08	1.61863e+08	1.71903e+08	1.61488e+08	1.52057e+08	1.54417e+08	1.3795e+08	1.30124e+08
Bermuda	Manufacturing (ISIC D)	9.83468e+07	9.09761e+07	8.84198e+07	8.40867e+07	8.09953e+07	80209716	7.80464e+07	7.76369e+07	7.46288e+07	7.45672e+07	6.90357e+07	6.50188e+07	5.53167e+07	5.08204e+07
Bermuda	Construction (ISIC F)	2.92192e+08	2.53111e+08	2.32148e+08	2.47567e+08	2.66583e+08	324234521	3.10138e+08	3.08666e+08	3.22843e+08	2.85961e+08	2.428e+08	2.32196e+08	1.74443e+08	1.80624e+08
Bermuda	Wholesale, retail trade, restaurants and hotels (ISIC G-H)	6.885e+08	6.82608e+08	6.80967e+08	6.34824e+08	6.51511e+08	649826585	7.09515e+08	6.81022e+08	6.3766e+08	5.91324e+08	5.99756e+08	5.94448e+08	5.70555e+08	5.48814e+08
Bermuda	Transport, storage and communication (ISIC I)	3.01592e+08	3.2137e+08	3.03362e+08	3.04705e+08	3.11635e+08	301760369	3.08518e+08	3.10102e+08	2.96263e+08	2.76131e+08	2.66206e+08	2.47176e+08	2.36185e+08	2.46223e+08
Bermuda	Other Activities (ISIC J-P)	2.93028e+09	3.24422e+09	3.22031e+09	3.45746e+09	3.48638e+09	3517110823	3.74222e+09	3.90375e+09	3.97309e+09	3.80272e+09	3.76825e+09	3.67514e+09	3.53019e+09	3.44645e+09
Bermuda	Total Value Added	4.40996e+09	4.70604e+09	4.64974e+09	4.85459e+09	4.92193e+09	4992156167	5.27464e+09	5.41758e+09	5.46205e+09	5.17858e+09	5.09146e+09	4.96427e+09	4.70957e+09	4.61103e+09
Bhutan	Final consumption expenditure	3.83016e+08	4.08514e+08	4.39965e+08	4.82663e+08	5.01241e+08	5.10152e+08	5.38005e+08	6.09457e+08	6.21848e+08	7.45755e+08	8.15853e+08	8.36507e+08	8.62432e+08	9.11527e+08
Bhutan	Household consumption expenditure (including Non-profit institutions serving households)	2.53642e+08	2.68852e+08	2.88343e+08	3.19255e+08	3.26508e+08	3.30752e+08	3.35052e+08	3.95664e+08	4.05177e+08	4.84097e+08	5.33983e+08	5.44828e+08	5.71887e+08	6.44467e+08
Bhutan	General government final consumption expenditure	1.2882e+08	1.39245e+08	1.513e+08	1.62749e+08	1.74573e+08	1.79399e+08	2.04386e+08	2.13738e+08	2.16461e+08	2.61596e+08	2.81345e+08	2.9142e+08	2.89219e+08	2.61488e+08
Bhutan	Gross capital formation	2.94741e+08	3.84394e+08	4.36477e+08	4.35623e+08	5.03399e+08	4.3739e+08	4.31382e+08	3.30533e+08	5.1008e+08	5.98972e+08	8.74959e+08	9.7855e+08	1.01373e+09	6.62887e+08
Bhutan	Gross fixed capital formation (including Acquisitions less disposals of valuables)	3.05999e+08	3.78763e+08	4.42038e+08	4.3912e+08	5.06183e+08	4.37511e+08	4.30944e+08	3.64111e+08	4.96801e+08	5.99568e+08	8.75829e+08	9.79522e+08	1.01474e+09	6.63546e+08
Bhutan	Changes in inventories	4.23279e+06	-2.32076e+06	1.97964e+06	1.18303e+06	881528	-121027	-334588	1.2835e+07	-5.32164e+06
Bhutan	Exports of goods and services	1.5479e+08	1.52555e+08	1.57005e+08	1.82538e+08	2.33135e+08	3.13216e+08	4.75047e+08	5.4996e+08	4.98749e+08	4.83984e+08	5.20386e+08	5.37054e+08	5.24161e+08	5.44455e+08
Bhutan	Imports of goods and services	2.54429e+08	2.77111e+08	3.2444e+08	3.63433e+08	4.67092e+08	5.27748e+08	5.16585e+08	5.73075e+08	5.88874e+08	6.73491e+08	8.67026e+08	9.18698e+08	8.53245e+08	8.38014e+08
Bhutan	Gross Domestic Product (GDP)	5.59544e+08	6.05448e+08	6.704e+08	7.21849e+08	7.64421e+08	8.1887e+08	8.74975e+08	1.032e+09	1.08088e+09	1.15283e+09	1.28808e+09	1.38973e+09	1.46021e+09	1.49007e+09	2.98612e+07
Bhutan	Agriculture, hunting, forestry, fishing (ISIC A-B)	1.60093e+08	1.68586e+08	1.73354e+08	1.77183e+08	1.80985e+08	1.82912e+08	1.87536e+08	1.8906e+08	1.90399e+08	1.95461e+08	1.97128e+08	2.01885e+08	2.06431e+08	2.12496e+08
Bhutan	Mining, Manufacturing, Utilities (ISIC C-E)	1.08388e+08	1.13245e+08	1.24783e+08	1.44435e+08	1.40115e+08	1.5318e+08	1.89202e+08	3.05235e+08	3.42567e+08	3.41802e+08	3.74652e+08	3.74328e+08	3.80562e+08	4.04818e+08
Bhutan	Manufacturing (ISIC D)	4.26188e+07	4.79313e+07	4.88422e+07	5.17919e+07	5.41018e+07	5.8297e+07	6.49924e+07	8.12647e+07	8.81784e+07	9.42455e+07	1.13267e+08	1.21534e+08	1.29782e+08	1.20409e+08
Bhutan	Construction (ISIC F)	8.28361e+07	1.03819e+08	1.29852e+08	1.33452e+08	1.44582e+08	1.41026e+08	1.27417e+08	1.33967e+08	1.20278e+08	1.40156e+08	1.69041e+08	1.93906e+08	2.29161e+08	2.24421e+08
Bhutan	Wholesale, retail trade, restaurants and hotels (ISIC G-H)	2.45209e+07	2.88176e+07	3.4092e+07	3.80802e+07	4.5241e+07	5.2167e+07	5.42684e+07	5.66124e+07	6.00759e+07	6.19477e+07	7.29828e+07	8.89322e+07	1.04449e+08	1.13997e+08
Bhutan	Transport, storage and communication (ISIC I)	5.96743e+07	6.11341e+07	6.63279e+07	6.65608e+07	8.11685e+07	8.82203e+07	9.47171e+07	1.02233e+08	1.07668e+08	1.17606e+08	1.30678e+08	1.48845e+08	1.57469e+08	1.62653e+08
Bhutan	Other Activities (ISIC J-P)	1.1436e+08	1.19808e+08	1.24499e+08	1.40135e+08	1.46113e+08	1.71479e+08	1.88292e+08	1.99287e+08	2.07218e+08	2.44618e+08	2.71545e+08	3.00256e+08	2.80445e+08	2.74789e+08
Bhutan	Total Value Added	5.47291e+08	5.9226e+08	6.4931e+08	6.99162e+08	7.35393e+08	7.88985e+08	8.45744e+08	1.00122e+09	1.04742e+09	1.12057e+09	1.23765e+09	1.32926e+09	1.3773e+09	1.41417e+09
Bolivia	Final consumption expenditure	6.97332e+09	7.07647e+09	7.23452e+09	7.38734e+09	7.60472e+09	7.85817e+09	8.16949e+09	8.50566e+09	8.95381e+09	9.28446e+09	9.64242e+09	1.01671e+10	1.06401e+10	1.13154e+10
Bolivia	Household consumption expenditure (including Non-profit institutions serving households)	5.65637e+09	5.72817e+09	5.84529e+09	5.95541e+09	6.12871e+09	6.33274e+09	6.59057e+09	6.86539e+09	7.2418e+09	7.5078e+09	7.80644e+09	8.20953e+09	8.58848e+09	9.09372e+09
Bolivia	General government final consumption expenditure	1.29817e+09	1.33533e+09	1.3815e+09	1.43085e+09	1.4759e+09	1.52543e+09	1.57537e+09	1.63473e+09	1.69866e+09	1.76355e+09	1.81767e+09	1.94932e+09	2.04455e+09	2.2345e+09
Bolivia	Gross capital formation	1.43527e+09	1.18454e+09	1.39611e+09	1.21702e+09	1.07286e+09	1.3611e+09	1.29181e+09	1.43464e+09	1.85519e+09	1.92714e+09	2.06488e+09	2.55048e+09	2.43502e+09	2.82359e+09
Bolivia	Gross fixed capital formation (including Acquisitions less disposals of valuables)	1.41713e+09	1.11317e+09	1.31919e+09	1.17612e+09	1.16297e+09	1.24051e+09	1.35581e+09	1.52723e+09	1.81241e+09	1.86477e+09	2.00396e+09	2.47924e+09	2.51547e+09	2.83997e+09
Bolivia	Changes in inventories	1.08823e+07	6.91332e+07	7.38048e+07	3.64491e+07	-1.02425e+08	1.20592e+08	-7.58658e+07	-1.07202e+08	3.46884e+07	5.51636e+07	5.28072e+07	6.09451e+07	-1.00156e+08	-3.4114e+07
Bolivia	Exports of goods and services	2.0912e+09	2.26638e+09	2.39541e+09	2.68677e+09	3.13333e+09	3.39453e+09	3.77936e+09	3.89612e+09	3.98085e+09	3.55267e+09	3.9027e+09	4.13231e+09	4.62468e+09	4.81406e+09
Bolivia	Imports of goods and services	2.33584e+09	2.21812e+09	2.50858e+09	2.53153e+09	2.66989e+09	3.06468e+09	3.22283e+09	3.36374e+09	3.68111e+09	3.30529e+09	3.67023e+09	4.29455e+09	4.47839e+09	4.8447e+09
Bolivia	Gross Domestic Product (GDP)	8.20135e+09	8.33944e+09	8.54672e+09	8.77845e+09	9.1448e+09	9.54912e+09	1.00072e+10	1.0464e+10	1.11073e+10	1.14802e+10	1.1954e+10	1.25725e+10	1.32233e+10	1.41192e+10	8.95894e+08
Bolivia	Agriculture, hunting, forestry, fishing (ISIC A-B)	9.47085e+08	9.79862e+08	9.84245e+08	1.07e+09	1.07265e+09	1.1261e+09	1.17407e+09	1.16813e+09	1.19868e+09	1.24281e+09	1.22817e+09	1.26621e+09	1.31875e+09	1.38053e+09
Bolivia	Mining, Manufacturing, Utilities (ISIC C-E)	1.89987e+09	1.92083e+09	1.9426e+09	2.02277e+09	2.15831e+09	2.29829e+09	2.45487e+09	2.6098e+09	2.88953e+09	2.95051e+09	3.05242e+09	3.19162e+09	3.34732e+09	3.58698e+09
Bolivia	Manufacturing (ISIC D)	9.55349e+08	9.81022e+08	9.8348e+08	1.02091e+09	1.07789e+09	1.11027e+09	1.20012e+09	1.27321e+09	1.31981e+09	1.3833e+09	1.41912e+09	1.47187e+09	1.54171e+09	1.63553e+09
Bolivia	Construction (ISIC F)	2.34497e+08	2.18114e+08	2.53393e+08	1.9342e+08	1.97634e+08	2.10191e+08	2.27529e+08	2.60174e+08	2.84112e+08	3.14854e+08	3.38336e+08	3.65469e+08	3.94789e+08	4.36809e+08
Bolivia	Wholesale, retail trade, restaurants and hotels (ISIC G-H)	8.03532e+08	8.12289e+08	8.28675e+08	8.43764e+08	8.73074e+08	8.94114e+08	9.24668e+08	9.68604e+08	1.00751e+09	1.05043e+09	1.09003e+09	1.12858e+09	1.17005e+09	1.21419e+09
Bolivia	Transport, storage and communication (ISIC I)	8.99844e+08	9.27024e+08	9.67129e+08	1.00455e+09	1.04508e+09	1.07565e+09	1.11778e+09	1.15692e+09	1.20341e+09	1.27056e+09	1.37207e+09	1.45618e+09	1.49559e+09	1.59559e+09
Bolivia	Other Activities (ISIC J-P)	2.40351e+09	2.43686e+09	2.43478e+09	2.43147e+09	2.457e+09	2.50115e+09	2.60694e+09	2.73464e+09	2.84465e+09	2.98407e+09	3.11938e+09	3.28136e+09	3.52188e+09	3.77163e+09
Bolivia	Total Value Added	7.1536e+09	7.25735e+09	7.37719e+09	7.54162e+09	7.78886e+09	8.1055e+09	8.51311e+09	8.90619e+09	9.45458e+09	9.83131e+09	1.02027e+10	1.06849e+10	1.1235e+10	1.19671e+10
Bosnia and Herzegovina	Final consumption expenditure	1.03632e+10	1.09475e+10	1.13456e+10	1.16476e+10	1.19353e+10	1.30328e+10	1.35634e+10	1.46555e+10	1.54107e+10	1.48668e+10	1.49354e+10	1.49092e+10	1.4849e+10	1.53406e+10
Bosnia and Herzegovina	Household consumption expenditure (including Non-profit institutions serving households)	8.11048e+09	8.81314e+09	9.2322e+09	9.48523e+09	9.62525e+09	1.06077e+10	1.10757e+10	1.18565e+10	1.25229e+10	1.19483e+10	1.19634e+10	1.1962e+10	1.18758e+10	1.22561e+10
Bosnia and Herzegovina	General government final consumption expenditure	2.22713e+09	2.1267e+09	2.11326e+09	2.16275e+09	2.30301e+09	2.42509e+09	2.49059e+09	2.79329e+09	2.88621e+09	2.90655e+09	2.95678e+09	2.93354e+09	2.95663e+09	3.06636e+09
Bosnia and Herzegovina	Gross capital formation	2.15325e+09	2.13343e+09	2.46386e+09	2.58576e+09	2.8244e+09	3.0533e+09	2.63429e+09	3.79145e+09	4.35944e+09	3.10483e+09	2.61048e+09	3.02328e+09	3.11579e+09	3.14312e+09
Bosnia and Herzegovina	Gross fixed capital formation (including Acquisitions less disposals of valuables)	2.14867e+09	2.1289e+09	2.45863e+09	2.58027e+09	2.52174e+09	3.04504e+09	2.75001e+09	3.3743e+09	3.92288e+09	3.15618e+09	2.80526e+09	3.0109e+09	3.04452e+09	3.12986e+09
Bosnia and Herzegovina	Changes in inventories	5.50927e+06	5.45858e+06	6.304e+06	6.61589e+06	8.27922e+07	8.26592e+06	-2.4162e+07	1.13908e+08	1.19996e+08	-6.81711e+06	-4.43466e+07	9.25551e+06	2.44398e+07	9.71836e+06
Bosnia and Herzegovina	Exports of goods and services	2.41041e+09	2.56045e+09	2.49219e+09	2.8029e+09	2.95093e+09	3.5499e+09	4.09481e+09	3.39757e+09	3.43476e+09	3.3501e+09	3.7984e+09	3.96137e+09	3.88423e+09	4.41798e+09
Bosnia and Herzegovina	Imports of goods and services	5.44547e+09	5.98779e+09	6.23308e+09	6.60732e+09	7.09287e+09	8.03893e+09	7.5932e+09	7.47606e+09	8.25424e+09	7.09413e+09	7.22241e+09	7.40881e+09	7.43138e+09	8.25307e+09
Bosnia and Herzegovina	Gross Domestic Product (GDP)	8.80773e+09	9.04457e+09	9.50051e+09	9.87088e+09	1.04942e+10	1.09036e+10	1.15242e+10	1.2213e+10	1.28963e+10	1.25457e+10	1.26514e+10	1.27726e+10	1.26184e+10	1.29311e+10	3.12683e+08
Bosnia and Herzegovina	Agriculture, hunting, forestry, fishing (ISIC A-B)	6.80095e+08	7.27297e+08	8.12454e+08	7.586e+08	8.78004e+08	9.27273e+08	9.80785e+08	1.00249e+09	1.04513e+09	1.02445e+09	9.83841e+08	9.82987e+08	8.71113e+08	1.01166e+09
Bosnia and Herzegovina	Mining, Manufacturing, Utilities (ISIC C-E)	1.44532e+09	1.4886e+09	1.53558e+09	1.61375e+09	1.74504e+09	1.86307e+09	2.09236e+09	2.26211e+09	2.41754e+09	2.31965e+09	2.44371e+09	2.45806e+09	2.13038e+09	2.50812e+09
Bosnia and Herzegovina	Manufacturing (ISIC D)	8.434e+08	8.69318e+08	9.35031e+08	9.64123e+08	1.01022e+09	1.07961e+09	1.24344e+09	1.39328e+09	1.47902e+09	1.39722e+09	1.49306e+09	1.49394e+09	1.48107e+09	1.55302e+09
Bosnia and Herzegovina	Construction (ISIC F)	4.5981e+08	4.38516e+08	4.21931e+08	4.36724e+08	4.39404e+08	4.82304e+08	4.88894e+08	5.51692e+08	6.45098e+08	5.96236e+08	5.24405e+08	5.0044e+08	4.89302e+08	4.84354e+08
Bosnia and Herzegovina	Wholesale, retail trade, restaurants and hotels (ISIC G-H)	9.89673e+08	1.0672e+09	1.19387e+09	1.32075e+09	1.47429e+09	1.53756e+09	1.64081e+09	1.79095e+09	1.89697e+09	1.77539e+09	1.7928e+09	1.81984e+09	1.83347e+09	1.8502e+09
Bosnia and Herzegovina	Transport, storage and communication (ISIC I)	6.18748e+08	6.86928e+08	7.48917e+08	8.01435e+08	8.75954e+08	9.11475e+08	9.65167e+08	1.01309e+09	1.09372e+09	1.05623e+09	1.06114e+09	1.09206e+09	1.09576e+09	1.12272e+09
Bosnia and Herzegovina	Other Activities (ISIC J-P)	3.16688e+09	3.13397e+09	3.18917e+09	3.3007e+09	3.36021e+09	3.42761e+09	3.54057e+09	3.68747e+09	3.79778e+09	3.45599e+09	3.51167e+09	3.99452e+09	3.59511e+09	3.86486e+09
Bosnia and Herzegovina	Total Value Added	7.38286e+09	7.55507e+09	7.90776e+09	8.24954e+09	8.77763e+09	9.14929e+09	9.69769e+09	1.03017e+10	1.0889e+10	1.02063e+10	1.02912e+10	1.08377e+10	1.00204e+10	1.08195e+10
Botswana	Final consumption expenditure	5.09679e+09	4.92657e+09	5.17524e+09	5.24197e+09	5.48446e+09	5.7112e+09	6.27275e+09	6.9934e+09	7.95689e+09	8.34361e+09	8.95798e+09	9.59932e+09	9.73388e+09	1.05676e+10
Botswana	Household consumption expenditure (including Non-profit institutions serving households)	3.26203e+09	3.11646e+09	3.27083e+09	3.31439e+09	3.41634e+09	3.78447e+09	4.43721e+09	5.10251e+09	5.98313e+09	6.31417e+09	6.85838e+09	7.39861e+09	7.48262e+09	7.78217e+09
Botswana	General government final consumption expenditure	1.82875e+09	1.80239e+09	1.89614e+09	1.91928e+09	2.05676e+09	1.92673e+09	1.85017e+09	1.91531e+09	2.01081e+09	2.07039e+09	2.14769e+09	2.25482e+09	2.3051e+09	2.82612e+09
Botswana	Gross capital formation	2.39358e+09	2.33606e+09	2.39966e+09	2.48472e+09	2.71054e+09	2.69636e+09	2.68439e+09	3.19208e+09	3.61008e+09	3.67813e+09	4.21431e+09	4.64837e+09	4.83576e+09	4.67732e+09
Botswana	Gross fixed capital formation (including Acquisitions less disposals of valuables)	1.94736e+09	2.0474e+09	2.13262e+09	2.24828e+09	2.47054e+09	2.51655e+09	2.69153e+09	2.99693e+09	3.09686e+09	3.39077e+09	3.70192e+09	4.15178e+09	4.7178e+09	4.52495e+09
Botswana	Changes in inventories	4.89112e+08	3.0855e+08	2.8306e+08	2.47032e+08	2.48864e+08	1.79808e+08	-3.49991e+07	1.925e+08	5.53997e+08	2.93667e+08	5.4701e+08	5.24517e+08	8.7346e+07	1.28497e+08
Botswana	Exports of goods and services	4.33637e+09	4.14798e+09	4.4527e+09	4.14103e+09	4.44701e+09	5.25596e+09	5.42062e+09	5.88036e+09	5.73454e+09	3.5743e+09	4.14704e+09	5.28938e+09	4.91899e+09	6.87753e+09
Botswana	Imports of goods and services	3.3942e+09	3.34239e+09	3.40928e+09	3.16039e+09	3.71718e+09	3.53371e+09	3.53527e+09	4.41751e+09	5.1925e+09	4.62736e+09	4.92725e+09	5.8745e+09	6.35432e+09	8.14745e+09
Botswana	Gross Domestic Product (GDP)	8.31265e+09	8.33348e+09	8.83928e+09	9.24818e+09	9.49841e+09	9.93122e+09	1.07619e+10	1.16526e+10	1.21072e+10	1.11579e+10	1.21168e+10	1.28529e+10	1.33281e+10	1.41939e+10	8.65799e+08
Botswana	Agriculture, hunting, forestry, fishing (ISIC A-B)	1.80656e+08	1.94065e+08	1.54311e+08	1.85366e+08	1.86242e+08	1.81581e+08	2.05781e+08	2.30974e+08	2.35506e+08	2.50515e+08	2.92375e+08	2.25454e+08	2.39861e+08	2.53282e+08
Botswana	Mining, Manufacturing, Utilities (ISIC C-E)	3.06064e+09	3.1391e+09	3.44838e+09	3.594e+09	3.55272e+09	3.7829e+09	4.04296e+09	4.01801e+09	3.75273e+09	2.42228e+09	2.82317e+09	2.8295e+09	2.63695e+09	2.87629e+09
Botswana	Manufacturing (ISIC D)	5.24211e+08	5.2982e+08	5.36995e+08	4.83556e+08	4.82644e+08	4.91546e+08	5.89902e+08	7.41486e+08	7.22463e+08	7.58656e+08	7.88314e+08	8.67682e+08	8.82998e+08	9.30218e+08
Botswana	Construction (ISIC F)	4.82407e+08	4.1202e+08	5.64305e+08	4.8445e+08	4.78905e+08	4.73118e+08	5.48376e+08	6.75698e+08	6.80974e+08	7.64954e+08	7.92484e+08	9.75242e+08	1.11603e+09	1.15841e+09
Botswana	Wholesale, retail trade, restaurants and hotels (ISIC G-H)	9.86385e+08	9.66622e+08	1.04034e+09	1.09495e+09	1.03711e+09	1.07603e+09	1.37055e+09	1.57947e+09	1.86333e+09	1.93523e+09	2.11497e+09	2.41019e+09	2.54367e+09	2.70474e+09
Botswana	Transport, storage and communication (ISIC I)	3.303e+08	3.16436e+08	3.21993e+08	3.11647e+08	3.13175e+08	3.57109e+08	4.06224e+08	4.6886e+08	5.16587e+08	5.93008e+08	6.21112e+08	6.75461e+08	7.37155e+08	7.6668e+08
Botswana	Other Activities (ISIC J-P)	2.45782e+09	2.5977e+09	2.73987e+09	2.84238e+09	2.99056e+09	3.06407e+09	3.1536e+09	3.41206e+09	3.66032e+09	3.7992e+09	4.14943e+09	4.46157e+09	4.78005e+09	5.07336e+09
Botswana	Total Value Added	7.48571e+09	7.62218e+09	8.25567e+09	8.50611e+09	8.55551e+09	8.93481e+09	9.70969e+09	1.03451e+10	1.06422e+10	9.65441e+09	1.06809e+10	1.14277e+10	1.18814e+10	1.2653e+10
Brazil	Final consumption expenditure	6.32324e+11	6.39991e+11	6.57104e+11	6.55338e+11	6.80858e+11	7.07275e+11	7.39104e+11	7.82212e+11	8.21498e+11	8.55178e+11	9.08709e+11	9.41021e+11	9.71577e+11	9.95002e+11
Brazil	Household consumption expenditure (including Non-profit institutions serving households)	4.81369e+11	4.84657e+11	4.94073e+11	4.90195e+11	5.08924e+11	5.31644e+11	5.59284e+11	5.93305e+11	6.26954e+11	6.54791e+11	7.00264e+11	7.2892e+11	7.524e+11	7.71603e+11
Brazil	General government final consumption expenditure	1.51502e+11	1.55657e+11	1.63044e+11	1.64926e+11	1.71676e+11	1.7563e+11	1.80155e+11	1.89389e+11	1.95394e+11	2.01468e+11	2.09997e+11	2.14047e+11	2.2117e+11	2.25535e+11
Brazil	Gross capital formation	1.54053e+11	1.50032e+11	1.33357e+11	1.31045e+11	1.46562e+11	1.42942e+11	1.57702e+11	1.83976e+11	2.12775e+11	1.78311e+11	2.16351e+11	2.26553e+11	2.1752e+11	2.28781e+11
Brazil	Gross fixed capital formation (including Acquisitions less disposals of valuables)	1.36908e+11	1.37505e+11	1.30311e+11	1.24325e+11	1.35665e+11	1.40584e+11	1.54324e+11	1.75698e+11	1.99546e+11	1.86128e+11	2.25836e+11	2.36485e+11	2.27056e+11	2.38812e+11
Brazil	Changes in inventories	1.00825e+10	7.66576e+09	2.63673e+09	4.5155e+09	6.79615e+09	2.35747e+09	3.00213e+09	5.74223e+09	8.52915e+09	-2.61515e+09	-3.17305e+09	-3.32268e+09	-3.1902e+09	-3.35536e+09
Brazil	Exports of goods and services	8.11175e+10	8.92678e+10	9.58889e+10	1.0586e+11	1.2205e+11	1.33439e+11	1.40165e+11	1.48853e+11	1.49664e+11	1.36008e+11	1.51673e+11	1.58484e+11	1.5924e+11	1.63268e+11
Brazil	Imports of goods and services	9.3882e+10	9.53042e+10	8.40389e+10	8.26786e+10	9.36752e+10	1.01611e+11	1.20357e+11	1.44278e+11	1.66433e+11	1.53787e+11	2.08898e+11	2.29263e+11	2.29727e+11	2.48893e+11
Brazil	Gross Domestic Product (GDP)	7.68855e+11	7.78951e+11	7.99656e+11	8.08825e+11	8.55028e+11	8.82044e+11	9.16947e+11	9.72802e+11	1.02302e+12	1.01963e+12	1.09645e+12	1.12641e+12	1.13803e+12	1.1664e+12	2.83699e+10
Brazil	Agriculture, hunting, forestry, fishing (ISIC A-B)	3.51975e+10	3.73313e+10	3.97861e+10	4.20963e+10	4.30714e+10	4.31989e+10	4.52734e+10	4.74655e+10	5.0463e+10	4.88917e+10	5.19867e+10	5.40155e+10	5.27509e+10	5.51006e+10
Brazil	Mining, Manufacturing, Utilities (ISIC C-E)	1.57112e+11	1.56991e+11	1.62663e+11	1.66726e+11	1.79901e+11	1.84463e+11	1.87747e+11	1.97706e+11	2.04124e+11	1.90569e+11	2.10274e+11	2.12631e+11	2.09604e+11	2.19565e+11
Brazil	Manufacturing (ISIC D)	1.18653e+11	1.19484e+11	1.22395e+11	1.24663e+11	1.35222e+11	1.36912e+11	1.38233e+11	1.4598e+11	1.50311e+11	1.37183e+11	1.51086e+11	1.51282e+11	1.47435e+11	1.56162e+11
Brazil	Construction (ISIC F)	3.68764e+10	3.61076e+10	3.53288e+10	3.41689e+10	3.64172e+10	3.70639e+10	3.8799e+10	4.06913e+10	4.39144e+10	4.35878e+10	4.86657e+10	5.04293e+10	5.11381e+10	5.21342e+10
Brazil	Wholesale, retail trade, restaurants and hotels (ISIC G-H)	1.23167e+11	1.2177e+11	1.24087e+11	1.24339e+11	1.32933e+11	1.39002e+11	1.46681e+11	1.58223e+11	1.67926e+11	1.68672e+11	1.79184e+11	1.84243e+11	1.86746e+11	1.90933e+11
Brazil	Transport, storage and communication (ISIC I)	5.73706e+10	5.94422e+10	6.16381e+10	6.17053e+10	6.52312e+10	6.76617e+10	6.89438e+10	7.31165e+10	7.88059e+10	7.75002e+10	8.30791e+10	8.55194e+10	8.63586e+10	8.84818e+10
Brazil	Other Activities (ISIC J-P)	2.46237e+11	2.53364e+11	2.62782e+11	2.66193e+11	2.76829e+11	2.85372e+11	2.96884e+11	3.11628e+11	3.22475e+11	3.35162e+11	3.50982e+11	3.60234e+11	3.67324e+11	3.74292e+11
Brazil	Total Value Added	6.57302e+11	6.66744e+11	6.87472e+11	6.9597e+11	7.34988e+11	7.56762e+11	7.84581e+11	8.30233e+11	8.69824e+11	8.6684e+11	9.2653e+11	9.49565e+11	9.5654e+11	9.83098e+11
British Virgin Islands	Final consumption expenditure	4.23129e+08	4.31837e+08	4.08771e+08	3.50268e+08	3.5802e+08	4.03e+08	4.0345e+08	4.01395e+08	3.95062e+08	4.06221e+08	4.08413e+08	3.98317e+08	3.77279e+08	3.73628e+08
British Virgin Islands	Household consumption expenditure (including Non-profit institutions serving households)	3.35851e+08	3.4397e+08	3.25523e+08	2.80214e+08	2.8662e+08	323000000	3.23884e+08	3.22346e+08	3.17651e+08	3.26652e+08	3.28393e+08	3.20451e+08	3.04081e+08	3.01351e+08
British Virgin Islands	General government final consumption expenditure	8.72772e+07	8.78676e+07	8.32484e+07	7.00536e+07	7.14e+07	80000000	7.95668e+07	7.90494e+07	7.74107e+07	7.95691e+07	8.00199e+07	7.78665e+07	7.31983e+07	7.22768e+07
British Virgin Islands	Gross capital formation	1.92231e+08	1.99309e+08	1.92112e+08	1.65862e+08	1.7136e+08	195000000	1.97513e+08	1.97623e+08	1.95751e+08	2.03111e+08	2.04726e+08	2.00656e+08	1.91236e+08	1.90198e+08
British Virgin Islands	Gross fixed capital formation (including Acquisitions less disposals of valuables)	1.99964e+08	2.08953e+08	2.01717e+08	1.76164e+08	1.8258e+08	209000000	2.11554e+08	2.12555e+08	2.10877e+08	2.19862e+08	2.22393e+08	2.18625e+08	2.08409e+08	2.07657e+08
British Virgin Islands	Changes in inventories	-7.73342e+06	-9.64401e+06	-9.60558e+06	-1.0302e+07	-1.122e+07	-14000000	-1.40412e+07	-1.49315e+07	-1.51262e+07	-1.67514e+07	-1.76667e+07	-1.79692e+07	-1.71733e+07	-1.7459e+07
British Virgin Islands	Exports of goods and services	8.66143e+08	9.17252e+08	8.95454e+08	7.88103e+08	8.2416e+08	947000000	9.66034e+08	9.76699e+08	9.74307e+08	1.0166e+09	1.03402e+09	1.01925e+09	9.753e+08	9.74598e+08
British Virgin Islands	Imports of goods and services	6.51817e+08	6.80438e+08	6.56382e+08	5.71761e+08	5.9262e+08	676000000	6.84274e+08	6.8773e+08	6.8246e+08	7.08793e+08	7.17061e+08	7.04792e+08	6.71771e+08	6.69082e+08
British Virgin Islands	Gross Domestic Product (GDP)	8.29686e+08	8.67961e+08	8.38888e+08	7.33502e+08	7.6092e+08	870000000	8.81787e+08	8.87988e+08	8.8266e+08	9.17139e+08	9.29062e+08	9.14433e+08	8.72045e+08	8.69248e+08	-2.79705e+06
British Virgin Islands	Agriculture, hunting, forestry, fishing (ISIC A-B)	1.04512e+07	1.01412e+07	1.01019e+07	9.74672e+06	9.66042e+06	9479000	8.87304e+06	8.34234e+06	8.44755e+06	9.93044e+06	9.35297e+06	8.9846e+06	9.10447e+06	9.01051e+06
British Virgin Islands	Mining, Manufacturing, Utilities (ISIC C-E)	4.37629e+07	4.39636e+07	4.43758e+07	4.34831e+07	4.4464e+07	44428000	4.23497e+07	4.05627e+07	4.11672e+07	4.91564e+07	4.85414e+07	4.75525e+07	4.67237e+07	4.73314e+07
British Virgin Islands	Manufacturing (ISIC D)	2.99781e+07	2.90874e+07	2.89758e+07	2.79555e+07	2.77093e+07	27189000	2.54531e+07	2.39291e+07	2.42313e+07	2.84847e+07	2.80589e+07	2.69538e+07	2.61147e+07	2.58458e+07
British Virgin Islands	Construction (ISIC F)	5.7656e+07	8.29728e+07	9.42287e+07	5.06652e+07	4.49606e+07	59905000	4.72107e+07	6.89293e+07	6.30319e+07	6.57314e+07	4.36472e+07	5.29093e+07	4.98032e+07	4.91301e+07
British Virgin Islands	Wholesale, retail trade, restaurants and hotels (ISIC G-H)	2.43761e+08	2.50461e+08	2.21721e+08	2.01997e+08	2.08968e+08	252404000	2.53249e+08	2.4733e+08	2.46579e+08	2.44027e+08	2.56687e+08	2.47576e+08	2.40612e+08	2.44138e+08
British Virgin Islands	Transport, storage and communication (ISIC I)	1.00337e+08	1.03059e+08	9.14484e+07	8.33185e+07	8.62328e+07	104116000	1.04508e+08	1.02105e+08	1.01781e+08	1.00778e+08	1.06e+08	1.01825e+08	9.93763e+07	1.00825e+08
British Virgin Islands	Other Activities (ISIC J-P)	3.90559e+08	3.8878e+08	3.91428e+08	3.53222e+08	3.80987e+08	408875000	4.2749e+08	4.34833e+08	4.26312e+08	4.48855e+08	4.72188e+08	4.6452e+08	4.36246e+08	4.21821e+08
British Virgin Islands	Total Value Added	8.46627e+08	8.79643e+08	8.53966e+08	7.42819e+08	7.75565e+08	8.79207e+08	8.8346e+08	9.02067e+08	8.87256e+08	9.18788e+08	9.36346e+08	9.23435e+08	8.81936e+08	8.72294e+08
Brunei Darussalam	Final consumption expenditure	3.21065e+09	3.42878e+09	3.40488e+09	3.62056e+09	3.92622e+09	3.89547e+09	4.2009e+09	4.55841e+09	4.58069e+09	4.8153e+09	4.94219e+09	4.94158e+09	5.12387e+09	5.22535e+09
Brunei Darussalam	Household consumption expenditure (including Non-profit institutions serving households)	1.57793e+09	1.64427e+09	1.65594e+09	1.91759e+09	2.15303e+09	2.14086e+09	2.2207e+09	2.26518e+09	2.30517e+09	2.41996e+09	2.46351e+09	2.55392e+09	2.68752e+09	2.76347e+09
Brunei Darussalam	General government final consumption expenditure	1.63171e+09	1.78321e+09	1.74778e+09	1.70258e+09	1.77316e+09	1.75461e+09	1.97972e+09	2.29194e+09	2.27438e+09	2.39411e+09	2.47732e+09	2.38678e+09	2.43565e+09	2.46129e+09
Brunei Darussalam	Gross capital formation	8.52332e+08	9.09112e+08	1.32487e+09	1.04854e+09	1.07828e+09	1.08341e+09	1.09866e+09	1.39029e+09	1.57344e+09	1.56839e+09	1.51306e+09	1.54442e+09	1.5906e+09	1.67899e+09
Brunei Darussalam	Gross fixed capital formation (including Acquisitions less disposals of valuables)	8.45816e+08	9.22135e+08	1.32013e+09	1.04324e+09	1.07403e+09	1.08224e+09	1.10043e+09	1.39065e+09	1.57495e+09	1.56801e+09	1.51225e+09	1.54404e+09	1.58983e+09	1.6783e+09
Brunei Darussalam	Changes in inventories	8.16101e+06	-1.71381e+07	5.71271e+06	6.52881e+06	5.16614e+06	1.16369e+06	-2.63569e+06	-913217	-2.4483e+06	0	571271		489660	351739
Brunei Darussalam	Exports of goods and services	6.22554e+09	6.30684e+09	6.67137e+09	6.82236e+09	6.7734e+09	6.68805e+09	6.93347e+09	6.26532e+09	5.8762e+09	5.56617e+09	5.13205e+09	5.98609e+09	5.77381e+09	5.29978e+09
Brunei Darussalam	Imports of goods and services	2.26731e+09	2.33951e+09	2.65152e+09	2.43739e+09	2.52899e+09	2.60104e+09	2.70749e+09	3.06527e+09	3.40158e+09	3.37405e+09	3.36512e+09	3.75031e+09	4.22806e+09	4.16283e+09
Brunei Darussalam	Gross Domestic Product (GDP)	8.6021e+09	8.83823e+09	9.18043e+09	9.44697e+09	9.4946e+09	9.53144e+09	9.95056e+09	9.9657e+09	9.77281e+09	9.6002e+09	9.84971e+09	1.01875e+10	1.02841e+10	1.0104e+10	-1.80139e+08
Brunei Darussalam	Agriculture, hunting, forestry, fishing (ISIC A-B)	6.42334e+07	6.7988e+07	7.151e+07	7.96368e+07	8.9152e+07	9.02429e+07	8.13755e+07	7.77258e+07	8.06065e+07	8.53944e+07	8.03034e+07	8.42428e+07	9.38792e+07	8.78186e+07
Brunei Darussalam	Mining, Manufacturing, Utilities (ISIC C-E)	6.29296e+09	6.29176e+09	6.55717e+09	6.78772e+09	6.73132e+09	6.56922e+09	6.78706e+09	6.33661e+09	5.9569e+09	5.65245e+09	5.74692e+09	5.92935e+09	5.7931e+09	5.40128e+09
Brunei Darussalam	Manufacturing (ISIC D)	1.09829e+09	1.0998e+09	1.1751e+09	1.21013e+09	1.19652e+09	1.1731e+09	1.18255e+09	1.14637e+09	1.17883e+09	1.06323e+09	1.07968e+09	1.11664e+09	1.12459e+09	1.1454e+09
Brunei Darussalam	Construction (ISIC F)	1.67958e+08	1.98683e+08	2.17136e+08	2.23486e+08	2.32878e+08	2.51442e+08	2.42098e+08	2.68507e+08	2.73522e+08	2.62207e+08	2.68414e+08	2.77366e+08	2.88516e+08	3.03411e+08
Brunei Darussalam	Wholesale, retail trade, restaurants and hotels (ISIC G-H)	2.51962e+08	2.61573e+08	2.89132e+08	3.05077e+08	3.152e+08	3.10022e+08	3.18235e+08	3.49236e+08	3.50804e+08	3.71922e+08	3.93738e+08	4.16543e+08	4.42955e+08	4.60338e+08
Brunei Darussalam	Transport, storage and communication (ISIC I)	2.46727e+08	2.51799e+08	2.67858e+08	2.73239e+08	2.63333e+08	2.74242e+08	2.76722e+08	3.08731e+08	3.31047e+08	3.48477e+08	3.70547e+08	3.88102e+08	4.06473e+08	4.21834e+08
Brunei Darussalam	Other Activities (ISIC J-P)	1.72826e+09	1.84958e+09	1.87054e+09	1.88866e+09	1.93722e+09	2.03617e+09	2.21966e+09	2.41469e+09	2.47488e+09	2.50173e+09	2.58129e+09	2.66384e+09	2.74982e+09	2.81279e+09
Brunei Darussalam	Total Value Added	8.60192e+09	8.83799e+09	9.18021e+09	9.44687e+09	9.49467e+09	9.53134e+09	9.95031e+09	9.96336e+09	9.77345e+09	9.60002e+09	9.84944e+09	1.01879e+10	1.02839e+10	1.01038e+10
Bulgaria	Final consumption expenditure	1.93229e+10	2.05291e+10	2.11862e+10	2.26765e+10	2.43296e+10	2.54522e+10	2.7368e+10	2.986e+10	3.06684e+10	2.86334e+10	2.88742e+10	2.93909e+10	3.02529e+10	2.98575e+10
Bulgaria	Household consumption expenditure (including Non-profit institutions serving households)	1.49514e+10	1.60467e+10	1.66431e+10	1.77103e+10	1.91593e+10	2.02334e+10	2.19767e+10	2.44523e+10	2.53463e+10	2.37293e+10	2.38555e+10	2.42843e+10	2.52289e+10	2.46601e+10
Bulgaria	General government final consumption expenditure	4.3256e+09	4.45175e+09	4.52075e+09	4.93077e+09	5.14988e+09	5.21878e+09	5.41598e+09	5.48776e+09	5.43044e+09	5.01256e+09	5.11974e+09	5.20972e+09	5.15616e+09	5.30108e+09
Bulgaria	Gross capital formation	4.00804e+09	4.67598e+09	4.96644e+09	5.7962e+09	6.65292e+09	8.22505e+09	9.92442e+09	1.12887e+10	1.31552e+10	9.95407e+09	8.13493e+09	7.84168e+09	8.04003e+09	7.85766e+09
Bulgaria	Gross fixed capital formation (including Acquisitions less disposals of valuables)	3.60616e+09	4.32813e+09	4.67858e+09	5.27936e+09	6.00459e+09	7.61176e+09	8.60174e+09	9.72952e+09	1.18681e+10	9.80133e+09	8.00593e+09	7.63682e+09	7.78624e+09	7.78009e+09
Bulgaria	Changes in inventories	4.02226e+08	3.47846e+08	2.87584e+08	5.17118e+08	6.48827e+08	6.13281e+08	1.32461e+09	1.56154e+09	1.28813e+09	1.50791e+08	1.27429e+08	2.03602e+08	2.52646e+08	7.58908e+07
Bulgaria	Exports of goods and services	7.97332e+09	8.07019e+09	8.78502e+09	9.35275e+09	1.16449e+10	1.2703e+10	1.36765e+10	1.63601e+10	1.67655e+10	1.48013e+10	1.73458e+10	1.93421e+10	1.94929e+10	2.12837e+10
Bulgaria	Imports of goods and services	8.58824e+09	9.66705e+09	1.02752e+10	1.1832e+10	1.49371e+10	1.70803e+10	1.97987e+10	2.42764e+10	2.54572e+10	1.99818e+10	2.07989e+10	2.25763e+10	2.35923e+10	2.47494e+10
Bulgaria	Gross Domestic Product (GDP)	2.27123e+10	2.35751e+10	2.46313e+10	2.59508e+10	2.76531e+10	2.93e+10	3.11958e+10	3.33506e+10	3.52698e+10	3.35021e+10	3.37217e+10	3.439e+10	3.45593e+10	3.49277e+10	3.68356e+08
Bulgaria	Agriculture, hunting, forestry, fishing (ISIC A-B)	2.19857e+09	2.20932e+09	2.3243e+09	2.27745e+09	2.36025e+09	2.16001e+09	2.14587e+09	1.56871e+09	2.06989e+09	1.88208e+09	1.76168e+09	1.73494e+09	1.60829e+09	1.66059e+09
Bulgaria	Mining, Manufacturing, Utilities (ISIC C-E)	4.34615e+09	4.57685e+09	4.82455e+09	5.22051e+09	5.41951e+09	5.64352e+09	6.04635e+09	6.74845e+09	6.89935e+09	6.37659e+09	5.81038e+09	6.81851e+09	6.99157e+09	6.99267e+09
Bulgaria	Manufacturing (ISIC D)	3.12665e+09	3.29321e+09	3.471e+09	3.75479e+09	3.90165e+09	4.05868e+09	4.34497e+09	4.87233e+09	4.94629e+09	4.57151e+09	4.25398e+09	4.7846e+09	5.0124e+09	4.96e+09
Bulgaria	Construction (ISIC F)	1.18184e+09	1.2437e+09	1.27806e+09	1.30666e+09	1.37939e+09	1.51497e+09	1.73417e+09	1.96455e+09	2.30706e+09	2.29937e+09	1.88392e+09	1.84328e+09	1.80619e+09	1.79485e+09
Bulgaria	Wholesale, retail trade, restaurants and hotels (ISIC G-H)	2.5112e+09	2.76644e+09	2.97631e+09	3.14043e+09	3.38647e+09	3.70779e+09	3.99088e+09	4.27879e+09	4.62366e+09	4.36141e+09	4.92395e+09	4.88726e+09	4.93766e+09	5.08255e+09
Bulgaria	Transport, storage and communication (ISIC I)	1.78827e+09	1.97005e+09	2.11949e+09	2.23633e+09	2.41165e+09	2.64034e+09	2.84182e+09	3.04756e+09	3.29201e+09	3.10529e+09	3.50958e+09	3.47596e+09	3.51558e+09	3.6168e+09
Bulgaria	Other Activities (ISIC J-P)	7.83589e+09	7.80966e+09	8.21795e+09	8.40793e+09	8.70601e+09	9.19321e+09	9.75937e+09	1.06036e+10	1.04929e+10	1.07977e+10	1.10945e+10	8.11145e+09	1.07936e+10	1.08748e+10
Bulgaria	Total Value Added	1.99305e+10	2.06079e+10	2.17632e+10	2.26136e+10	2.3666e+10	2.48598e+10	2.65219e+10	2.82834e+10	2.96657e+10	2.88592e+10	2.89262e+10	2.66803e+10	2.96293e+10	2.99755e+10
Burkina Faso	Final consumption expenditure	3.79478e+09	3.97878e+09	4.166e+09	4.45155e+09	4.68227e+09	5.02307e+09	5.27672e+09	5.42969e+09	5.81829e+09	5.92429e+09	6.11672e+09	6.38252e+09	7.08216e+09	7.43816e+09
Burkina Faso	Household consumption expenditure (including Non-profit institutions serving households)	3.04918e+09	3.13686e+09	3.27143e+09	3.53714e+09	3.68867e+09	3.94312e+09	4.04574e+09	4.11892e+09	4.48686e+09	4.55801e+09	4.66562e+09	4.82088e+09	5.38733e+09	5.80989e+09
Burkina Faso	General government final consumption expenditure	7.51823e+08	8.43118e+08	8.94663e+08	9.18186e+08	9.94763e+08	1.07995e+09	1.22243e+09	1.29808e+09	1.32431e+09	1.35808e+09	1.43906e+09	1.54488e+09	1.6796e+09	1.6257e+09
Burkina Faso	Gross capital formation	8.01179e+08	8.53351e+08	8.57904e+08	1.01324e+09	1.113e+09	1.31628e+09	1.31673e+09	1.4204e+09	1.60388e+09	1.8014e+09	2.12818e+09	2.61217e+09	2.72057e+09	2.91374e+09
Burkina Faso	Gross fixed capital formation (including Acquisitions less disposals of valuables)	7.35854e+08	7.12502e+08	7.2528e+08	8.33618e+08	9.26781e+08	1.07549e+09	1.09849e+09	1.1971e+09	1.30051e+09	1.50074e+09	1.7717e+09	2.19703e+09	2.33347e+09	2.49915e+09
Burkina Faso	Changes in inventories	-2.90991e+08	7.39204e+07	2.59693e+07	1.54479e+08	1.09968e+08	2.40796e+08	1.18952e+08	6.30018e+07	3.4703e+08	1.7401e+08	2.12429e+08	1.40005e+08	-9.79494e+07	-1.04904e+08
Burkina Faso	Exports of goods and services	4.66575e+08	4.25036e+08	4.13537e+08	4.11347e+08	5.1958e+08	5.32286e+08	6.65194e+08	7.00291e+08	7.41098e+08	8.72975e+08	1.44555e+09	1.75295e+09	1.99994e+09	2.19207e+09
Burkina Faso	Imports of goods and services	1.03901e+09	9.72758e+08	9.70319e+08	1.06712e+09	1.28273e+09	1.40893e+09	1.43038e+09	1.47884e+09	1.75098e+09	1.98302e+09	2.42714e+09	2.9791e+09	3.45248e+09	3.68842e+09
Burkina Faso	Gross Domestic Product (GDP)	4.01199e+09	4.27732e+09	4.46352e+09	4.81177e+09	5.02728e+09	5.46272e+09	5.80433e+09	6.04296e+09	6.39346e+09	6.58282e+09	7.13883e+09	7.61191e+09	8.21782e+09	8.7717e+09	5.53881e+08
Burkina Faso	Agriculture, hunting, forestry, fishing (ISIC A-B)	1.28304e+09	1.37289e+09	1.623e+09	1.85545e+09	1.75701e+09	1.92798e+09	2.29361e+09	2.1465e+09	2.49984e+09	2.74285e+09	3.06571e+09	3.01709e+09	3.40347e+09	3.62553e+09
Burkina Faso	Mining, Manufacturing, Utilities (ISIC C-E)	4.54768e+08	4.45533e+08	4.43439e+08	5.9668e+08	6.49285e+08	6.6379e+08	6.15165e+08	6.63711e+08	5.86712e+08	6.93418e+08	8.6783e+08	1.37479e+09	1.11629e+09	1.28071e+09
Burkina Faso	Manufacturing (ISIC D)	3.91235e+08	3.8315e+08	3.8336e+08	5.06336e+08	5.61258e+08	5.77394e+08	5.314e+08	5.85967e+08	4.63731e+08	4.70575e+08	4.85912e+08	6.20665e+08	6.05626e+08	6.5291e+08
Burkina Faso	Construction (ISIC F)	2.32151e+08	2.49241e+08	1.83086e+08	1.79764e+08	2.18468e+08	2.24342e+08	2.67363e+08	2.8685e+08	3.20909e+08	3.69391e+08	3.66544e+08	5.44018e+08	4.90135e+08	5.33487e+08
Burkina Faso	Wholesale, retail trade, restaurants and hotels (ISIC G-H)	4.18774e+08	4.09791e+08	4.24291e+08	4.74839e+08	5.41598e+08	6.01841e+08	6.80726e+08	7.29777e+08	7.83245e+08	1.01087e+09	1.11216e+09	1.07817e+09	1.2354e+09	1.30922e+09
Burkina Faso	Transport, storage and communication (ISIC I)	1.63488e+08	1.49232e+08	1.99949e+08	2.00428e+08	2.2874e+08	2.22783e+08	2.73017e+08	3.47341e+08	3.73723e+08	3.52148e+08	4.32171e+08	3.88728e+08	4.52258e+08	4.87239e+08
Burkina Faso	Other Activities (ISIC J-P)	1.02991e+09	1.18742e+09	1.1188e+09	1.21618e+09	1.30533e+09	1.37171e+09	1.51927e+09	1.58572e+09	1.61e+09	1.94314e+09	2.03379e+09	2.25225e+09	2.39949e+09	2.55187e+09
Burkina Faso	Total Value Added	3.58903e+09	3.81334e+09	3.96963e+09	4.51023e+09	4.70796e+09	5.01245e+09	5.61879e+09	5.75111e+09	6.13015e+09	7.07923e+09	7.85373e+09	8.72549e+09	9.09945e+09	9.80594e+09
Burundi	Final consumption expenditure	1.03339e+09	1.03199e+09	1.0881e+09	1.07868e+09	1.10378e+09	1.16681e+09	1.29709e+09	1.37011e+09	1.61219e+09	1.97105e+09	2.23325e+09	2.19111e+09	2.41573e+09	2.55441e+09
Burundi	Household consumption expenditure (including Non-profit institutions serving households)	9.19254e+08	8.95537e+08	9.4918e+08	9.35417e+08	9.47858e+08	1.00501e+09	1.13516e+09	1.17863e+09	1.32916e+09	1.63887e+09	1.82127e+09	1.78131e+09	1.99774e+09	2.1176e+09
Burundi	General government final consumption expenditure	1.1414e+08	1.36454e+08	1.38924e+08	1.43258e+08	1.55922e+08	1.61801e+08	1.61932e+08	1.91482e+08	2.83027e+08	3.32176e+08	4.11983e+08	4.09799e+08	4.17995e+08	4.36805e+08
Burundi	Gross capital formation	8.67279e+07	1.00925e+08	1.05951e+08	1.94431e+08	2.50253e+08	2.04331e+08	2.20281e+08	2.1032e+08	2.07368e+08	2.94721e+08	3.78971e+08	3.98033e+08	4.99479e+08	6.36836e+08
Burundi	Gross fixed capital formation (including Acquisitions less disposals of valuables)	8.67279e+07	1.00925e+08	1.05951e+08	1.94431e+08	2.50253e+08	2.05256e+08	2.04308e+08	2.04132e+08	2.06468e+08	2.85093e+08	3.637e+08	4.44733e+08	4.99479e+08	6.36836e+08
Burundi	Changes in inventories						-1.01981e+06	1.76182e+07	6.82557e+06	993292	1.06193e+07	1.68431e+07	-5.151e+07
Burundi	Exports of goods and services	4.90037e+07	5.19488e+07	4.52786e+07	5.99489e+07	5.77667e+07	6.93432e+07	7.63043e+07	8.73946e+07	1.53979e+08	1.23393e+08	1.97214e+08	1.64654e+08	2.15499e+08	2.43729e+08
Burundi	Imports of goods and services	1.74738e+08	1.82339e+08	1.82758e+08	2.66242e+08	2.76572e+08	3.22677e+08	4.16084e+08	4.15347e+08	5.50497e+08	5.55306e+08	6.87162e+08	7.01318e+08	9.17885e+08	9.91316e+08
Burundi	Gross Domestic Product (GDP)	1.0241e+09	1.04562e+09	1.09266e+09	1.07955e+09	1.12705e+09	1.11689e+09	1.17759e+09	1.25248e+09	1.42304e+09	1.83386e+09	2.12227e+09	2.21183e+09	2.3054e+09	2.4119e+09	1.06509e+08
Burundi	Agriculture, hunting, forestry, fishing (ISIC A-B)	4.67583e+08	4.51484e+08	4.70602e+08	4.29189e+08	4.14167e+08	4.56412e+08	4.70873e+08	4.45234e+08	4.74797e+08	6.52232e+08	7.58428e+08	7.64495e+08	8.04249e+08	8.35614e+08
Burundi	Mining, Manufacturing, Utilities (ISIC C-E)	1.55227e+08	1.45557e+08	1.36488e+08	1.45176e+08	1.48617e+08	1.52037e+08	1.58639e+08	1.49735e+08	1.76108e+08	1.88641e+08	2.59359e+08	2.80077e+08	3.05522e+08	3.35597e+08
Burundi	Manufacturing (ISIC D)	1.35197e+08	1.26892e+08	1.17656e+08	1.27623e+08	1.2992e+08	1.32778e+08	1.41272e+08	1.29322e+08	1.57615e+08	1.60724e+08	2.36935e+08	2.54469e+08	2.78643e+08	3.05672e+08
Burundi	Construction (ISIC F)	3.65472e+07	3.44513e+07	3.094e+07	3.52716e+07	3.57301e+07	3.71236e+07	4.06767e+07	5.1938e+07	5.99393e+07	7.28806e+07	8.86224e+07	9.33194e+07	9.8172e+07	1.07008e+08
Burundi	Wholesale, retail trade, restaurants and hotels (ISIC G-H)	6.4662e+07	7.5176e+07	8.50895e+07	8.88334e+07	9.89604e+07	1.09945e+08	1.18343e+08	1.25349e+08	9.59192e+07	1.16675e+08	1.33968e+08	1.45222e+08	1.53064e+08	1.62094e+08
Burundi	Transport, storage and communication (ISIC I)	1.99103e+07	2.30049e+07	2.62936e+07	2.74242e+07	2.97278e+07	3.28493e+07	3.58735e+07	5.80347e+07	4.36908e+07	8.62971e+07	8.03956e+07	8.54605e+07	8.9819e+07	9.49386e+07
Burundi	Other Activities (ISIC J-P)	2.07016e+08	2.39561e+08	2.60843e+08	2.987e+08	3.11012e+08	2.73195e+08	2.58946e+08	3.29479e+08	4.56423e+08	5.18387e+08	5.98526e+08	6.1824e+08	6.25559e+08	6.44176e+08
Burundi	Total Value Added	9.73335e+08	9.95143e+08	1.03847e+09	1.0569e+09	1.07185e+09	1.06055e+09	1.11139e+09	1.1954e+09	1.35624e+09	1.73172e+09	1.98423e+09	2.05368e+09	2.14404e+09	2.2491e+09
Cabo Verde	Final consumption expenditure	6.89532e+08	7.06098e+08	7.5771e+08	8.30726e+08	9.05005e+08	9.27662e+08	9.72525e+08	1.02401e+09	1.04548e+09	1.11176e+09	1.106e+09	1.13972e+09	1.14433e+09	9.75185e+08
Cabo Verde	Household consumption expenditure (including Non-profit institutions serving households)	5.47427e+08	5.68979e+08	6.07457e+08	6.55279e+08	7.11574e+08	7.21463e+08	7.71977e+08	8.00619e+08	8.13533e+08	8.63008e+08	8.52329e+08	8.70766e+08	8.84821e+08	7.16553e+08
Cabo Verde	General government final consumption expenditure	1.42041e+08	1.37006e+08	1.50149e+08	1.75394e+08	1.93387e+08	2.06199e+08	2.00458e+08	2.23365e+08	2.31943e+08	2.48762e+08	2.53716e+08	2.69042e+08	2.59534e+08	2.58872e+08
Cabo Verde	Gross capital formation	2.72442e+08	3.04971e+08	3.61246e+08	3.65298e+08	4.56176e+08	4.2214e+08	4.90654e+08	6.89522e+08	7.15933e+08	6.51156e+08	7.17498e+08	7.29839e+08	5.61479e+08	5.67473e+08
Cabo Verde	Gross fixed capital formation (including Acquisitions less disposals of valuables)	2.47976e+08	2.7e+08	3.25928e+08	3.24391e+08	4.03702e+08	3.76875e+08	4.45883e+08	6.11067e+08	6.26287e+08	5.72883e+08	6.8149e+08	7.19378e+08	5.51951e+08	5.57844e+08
Cabo Verde	Changes in inventories	2.43627e+07	3.5021e+07	3.52443e+07	4.09448e+07	5.25517e+07	4.52643e+07	4.46e+07	7.85536e+07	8.99269e+07	7.84568e+07	3.51152e+07	8.98253e+06	8.42264e+06	8.51256e+06
Cabo Verde	Exports of goods and services	3.09538e+08	3.06548e+08	3.43791e+08	2.83408e+08	2.905e+08	3.15569e+08	3.59246e+08	4.12132e+08	4.42469e+08	3.65058e+08	3.98449e+08	4.44168e+08	4.85823e+08	5.32987e+08
Cabo Verde	Imports of goods and services	4.2935e+08	4.33311e+08	5.11024e+08	5.20555e+08	6.35401e+08	5.93362e+08	6.34726e+08	7.85101e+08	7.7574e+08	7.24944e+08	7.93975e+08	8.30167e+08	7.07804e+08	6.72101e+08
Cabo Verde	Gross Domestic Product (GDP)	8.50706e+08	9.02915e+08	9.50612e+08	9.95131e+08	1.03772e+09	1.10539e+09	1.2175e+09	1.3228e+09	1.41077e+09	1.39285e+09	1.41328e+09	1.46937e+09	1.48754e+09	1.49533e+09	7.79307e+06
Cabo Verde	Agriculture, hunting, forestry, fishing (ISIC A-B)	1.30646e+08	1.3031e+08	1.23184e+08	1.253e+08	1.25018e+08	1.17946e+08	1.18255e+08	1.1826e+08	1.19389e+08	1.31943e+08	1.26914e+08	1.33529e+08	1.41719e+08	1.37544e+08
Cabo Verde	Mining, Manufacturing, Utilities (ISIC C-E)	1.21321e+08	1.05492e+08	1.08228e+08	1.10291e+08	1.1107e+08	1.1705e+08	1.20696e+08	1.24364e+08	1.4565e+08	1.43185e+08	1.56733e+08	1.59804e+08	1.73141e+08	1.67503e+08
Cabo Verde	Manufacturing (ISIC D)	7.13435e+07	5.92808e+07	5.92267e+07	5.92827e+07	5.63503e+07	6.11082e+07	6.02294e+07	6.41202e+07	7.19394e+07	7.07337e+07	7.83422e+07	8.19523e+07	8.47441e+07	8.38262e+07
Cabo Verde	Construction (ISIC F)	8.00775e+07	8.36834e+07	9.6712e+07	9.70027e+07	9.7464e+07	1.12293e+08	1.30467e+08	1.41615e+08	1.687e+08	1.55778e+08	1.38713e+08	1.39586e+08	1.25886e+08	1.38454e+08
Cabo Verde	Wholesale, retail trade, restaurants and hotels (ISIC G-H)	1.0513e+08	1.19251e+08	1.32611e+08	1.4138e+08	1.50315e+08	1.61371e+08	1.75544e+08	2.08255e+08	2.04931e+08	2.11498e+08	2.15113e+08	2.28535e+08	2.44377e+08	2.35277e+08
Cabo Verde	Transport, storage and communication (ISIC I)	1.61248e+08	1.73581e+08	1.65719e+08	1.75888e+08	1.85004e+08	1.83776e+08	2.16069e+08	2.30876e+08	2.46672e+08	2.34832e+08	2.49273e+08	2.30206e+08	2.55548e+08	2.51635e+08
Cabo Verde	Other Activities (ISIC J-P)	2.36797e+08	2.47544e+08	2.59272e+08	2.7414e+08	2.94703e+08	3.12726e+08	3.34011e+08	3.57676e+08	3.80084e+08	3.87322e+08	3.98259e+08	4.25184e+08	4.24892e+08	4.27065e+08
Cabo Verde	Total Value Added	8.20837e+08	8.52863e+08	8.81207e+08	9.20444e+08	9.62009e+08	1.00516e+09	1.09678e+09	1.18661e+09	1.26643e+09	1.26713e+09	1.28259e+09	1.31765e+09	1.36119e+09	1.35543e+09
Cambodia	Final consumption expenditure	3.79949e+09	3.89961e+09	4.23944e+09	4.56745e+09	5.07372e+09	5.66973e+09	6.03431e+09	6.45523e+09	7.24376e+09	7.33247e+09	7.99636e+09	8.81257e+09	9.22892e+09	9.5358e+09
Cambodia	Household consumption expenditure (including Non-profit institutions serving households)	3.58638e+09	3.66775e+09	3.88418e+09	4.19844e+09	4.72265e+09	5.30468e+09	5.66289e+09	6.01171e+09	6.77784e+09	6.76618e+09	7.3594e+09	8.12597e+09	8.50292e+09	8.75902e+09
Cambodia	General government final consumption expenditure	2.12879e+08	2.3172e+08	3.55864e+08	3.69563e+08	3.51251e+08	3.65053e+08	3.71293e+08	4.43732e+08	4.65921e+08	5.66985e+08	6.37856e+08	6.87476e+08	7.26978e+08	7.77977e+08
Cambodia	Gross capital formation	6.55673e+08	7.79917e+08	7.98189e+08	9.71213e+08	8.94316e+08	1.16205e+09	1.45071e+09	1.64984e+09	1.91405e+09	1.98751e+09	1.83023e+09	2.00923e+09	2.33738e+09	2.50135e+09
Cambodia	Gross fixed capital formation (including Acquisitions less disposals of valuables)	6.84024e+08	6.55115e+08	8.35084e+08	8.95987e+08	9.94591e+08	1.18857e+09	1.38689e+09	1.52721e+09	1.7704e+09	1.84157e+09	1.66035e+09	1.83911e+09	2.15872e+09	2.31016e+09
Cambodia	Changes in inventories	-2.76352e+07	1.17188e+08	-3.5898e+07	7.00258e+07	-9.60102e+07	-2.65192e+07	5.86482e+07	1.1407e+08	1.33641e+08	1.35727e+08	1.58581e+08	1.58581e+08	1.66267e+08	1.77931e+08
Cambodia	Exports of goods and services	1.84628e+09	2.15472e+09	2.4353e+09	2.70522e+09	3.46496e+09	4.03289e+09	4.8066e+09	5.29431e+09	6.12315e+09	5.51906e+09	6.65386e+09	7.91039e+09	9.05145e+09	1.00649e+10
Cambodia	Imports of goods and services	2.28345e+09	2.50163e+09	2.88325e+09	3.25654e+09	3.90213e+09	4.57801e+09	5.30829e+09	5.94852e+09	7.29311e+09	6.55212e+09	7.65427e+09	8.90572e+09	1.04075e+10	1.14212e+10
Cambodia	Gross Domestic Product (GDP)	4.02664e+09	4.35473e+09	4.64123e+09	5.03602e+09	5.55678e+09	6.29305e+09	6.97087e+09	7.68278e+09	8.19688e+09	8.204e+09	8.6932e+09	9.30777e+09	9.98848e+09	1.07336e+10	7.45108e+08
Cambodia	Agriculture, hunting, forestry, fishing (ISIC A-B)	1.50963e+09	1.56334e+09	1.52445e+09	1.68465e+09	1.67006e+09	1.9326e+09	2.03849e+09	2.141e+09	2.26335e+09	2.38598e+09	2.48039e+09	2.5568e+09	2.66688e+09	2.71197e+09
Cambodia	Mining, Manufacturing, Utilities (ISIC C-E)	6.12505e+08	7.05962e+08	8.07697e+08	9.07163e+08	1.06692e+09	1.1743e+09	1.38253e+09	1.506e+09	1.55868e+09	1.33887e+09	1.72363e+09	1.9986e+09	2.14812e+09	2.36394e+09
Cambodia	Manufacturing (ISIC D)	5.86356e+08	6.75484e+08	7.72809e+08	8.67895e+08	1.02117e+09	1.12046e+09	1.31581e+09	1.43271e+09	1.47738e+09	1.24823e+09	1.61721e+09	1.87866e+09	2.00751e+09	2.20469e+09
Cambodia	Construction (ISIC F)	2.08038e+08	2.04253e+08	2.59553e+08	2.88462e+08	3.26419e+08	3.98419e+08	4.78083e+08	5.10341e+08	5.3994e+08	5.66937e+08	4.22368e+08	4.5584e+08	5.38802e+08	6.19561e+08
Cambodia	Wholesale, retail trade, restaurants and hotels (ISIC G-H)	6.03372e+08	6.53433e+08	7.01828e+08	6.81694e+08	7.5448e+08	8.50588e+08	9.29835e+08	1.02054e+09	1.11788e+09	1.15549e+09	1.25682e+09	1.32173e+09	1.43332e+09	1.57847e+09
Cambodia	Transport, storage and communication (ISIC I)	2.90158e+08	3.38787e+08	3.59396e+08	3.70921e+08	4.06377e+08	4.65197e+08	4.75156e+08	5.09377e+08	5.45541e+08	5.66818e+08	6.12161e+08	6.47674e+08	6.87101e+08	7.48418e+08
Cambodia	Other Activities (ISIC J-P)	6.28391e+08	6.99459e+08	7.5981e+08	8.70433e+08	1.01329e+09	1.14339e+09	1.29828e+09	1.44571e+09	1.58001e+09	1.59812e+09	1.56841e+09	1.64024e+09	1.78055e+09	1.91424e+09
Cambodia	Total Value Added	3.82231e+09	4.13848e+09	4.39607e+09	4.79291e+09	5.24215e+09	5.96449e+09	6.61948e+09	7.15628e+09	7.6265e+09	7.6048e+09	8.07986e+09	8.65716e+09	9.29828e+09	9.99313e+09
Cameroon	Final consumption expenditure	1.11953e+10	1.16253e+10	1.21101e+10	1.27985e+10	1.32176e+10	1.35935e+10	1.40908e+10	1.48158e+10	1.53443e+10	1.58472e+10	1.66436e+10	1.75339e+10	1.84886e+10	1.95295e+10
Cameroon	Household consumption expenditure (including Non-profit institutions serving households)	9.79813e+09	1.01521e+10	1.05851e+10	1.12191e+10	1.15774e+10	1.19402e+10	1.2388e+10	1.29623e+10	1.33766e+10	1.37899e+10	1.44173e+10	1.51863e+10	1.60125e+10	1.68943e+10
Cameroon	General government final consumption expenditure	1.3993e+09	1.47674e+09	1.52813e+09	1.58076e+09	1.64215e+09	1.6533e+09	1.70214e+09	1.85662e+09	1.97381e+09	2.06512e+09	2.23849e+09	2.36068e+09	2.48987e+09	2.65089e+09
Cameroon	Gross capital formation	2.34569e+09	2.93728e+09	2.85884e+09	2.8942e+09	3.14506e+09	3.16294e+09	3.242e+09	3.42635e+09	3.71897e+09	3.93846e+09	4.15887e+09	4.62797e+09	4.71545e+09	4.95366e+09
Cameroon	Gross fixed capital formation (including Acquisitions less disposals of valuables)	2.14142e+09	2.68413e+09	2.79098e+09	2.62681e+09	2.91831e+09	2.93266e+09	2.93978e+09	3.28257e+09	3.43421e+09	3.55367e+09	3.9349e+09	4.41213e+09	4.47344e+09	4.7052e+09
Cameroon	Changes in inventories	2.62003e+08	3.20922e+08	-1.74013e+08	3.65113e+08	2.22914e+08	2.30277e+08	4.16346e+08	-3.8423e+07	3.08893e+08	5.53856e+08	8.80684e+07	7.02964e+06	6.73299e+07	5.5013e+07
Cameroon	Exports of goods and services	3.12942e+09	3.12891e+09	3.07406e+09	3.07073e+09	3.34582e+09	3.393e+09	3.43755e+09	3.62106e+09	3.48747e+09	3.05131e+09	3.28898e+09	3.36289e+09	3.31974e+09	4.1832e+09
Cameroon	Imports of goods and services	2.85237e+09	3.2527e+09	3.00527e+09	3.11345e+09	3.49484e+09	3.56161e+09	3.64376e+09	4.19603e+09	4.3654e+09	4.27279e+09	4.94346e+09	5.59579e+09	5.66555e+09	6.70056e+09
Cameroon	Gross Domestic Product (GDP)	1.38271e+10	1.44513e+10	1.50307e+10	1.56366e+10	1.62154e+10	1.65879e+10	1.71227e+10	1.76801e+10	1.819e+10	1.85414e+10	1.91475e+10	1.99403e+10	2.08553e+10	2.20152e+10	1.15991e+09
Cameroon	Agriculture, hunting, forestry, fishing (ISIC A-B)	2.64731e+09	2.74595e+09	2.8467e+09	2.94642e+09	3.07506e+09	3.15774e+09	3.25299e+09	3.44539e+09	3.6254e+09	3.72935e+09	3.95286e+09	4.07673e+09	4.18487e+09	4.33784e+09
Cameroon	Mining, Manufacturing, Utilities (ISIC C-E)	4.46094e+09	4.49585e+09	4.5124e+09	4.52225e+09	4.47709e+09	4.42726e+09	4.49776e+09	4.42606e+09	4.52434e+09	4.34729e+09	4.32806e+09	4.35314e+09	4.55444e+09	4.76788e+09
Cameroon	Manufacturing (ISIC D)	2.51256e+09	2.59726e+09	2.67546e+09	2.74079e+09	2.80474e+09	2.8619e+09	2.84464e+09	2.85885e+09	2.95875e+09	2.92937e+09	3.00931e+09	3.07737e+09	3.23303e+09	3.34937e+09
Cameroon	Construction (ISIC F)	3.83113e+08	3.97988e+08	4.2053e+08	4.38573e+08	4.75221e+08	4.80476e+08	4.99516e+08	5.02102e+08	4.60697e+08	5.18409e+08	5.65514e+08	6.19615e+08	6.6106e+08	7.46369e+08
Cameroon	Wholesale, retail trade, restaurants and hotels (ISIC G-H)	2.43263e+09	2.74011e+09	2.9409e+09	3.22794e+09	3.45103e+09	3.54038e+09	3.60511e+09	3.67592e+09	3.70034e+09	3.70536e+09	3.77241e+09	3.95955e+09	4.16792e+09	4.39881e+09
Cameroon	Transport, storage and communication (ISIC I)	5.82232e+08	6.25348e+08	6.95631e+08	7.6547e+08	8.35527e+08	9.09676e+08	1.01792e+09	1.11214e+09	1.20667e+09	1.29712e+09	1.36522e+09	1.47709e+09	1.59683e+09	1.72262e+09
Cameroon	Other Activities (ISIC J-P)	2.40308e+09	2.51708e+09	2.65991e+09	2.75312e+09	2.89527e+09	2.92797e+09	2.98132e+09	3.16965e+09	3.21018e+09	3.37723e+09	3.57269e+09	3.74236e+09	3.90784e+09	4.13052e+09
Cameroon	Total Value Added	1.28361e+10	1.3453e+10	1.40199e+10	1.46119e+10	1.51832e+10	1.54435e+10	1.58841e+10	1.63943e+10	1.68284e+10	1.71037e+10	1.77059e+10	1.84001e+10	1.92611e+10	2.03049e+10
Canada	Final consumption expenditure	7.34955e+11	7.55065e+11	7.80775e+11	8.04051e+11	8.26503e+11	8.52774e+11	8.86798e+11	9.22525e+11	9.5365e+11	9.6474e+11	9.96387e+11	1.01593e+12	1.03451e+12	1.05479e+12
Canada	Household consumption expenditure (including Non-profit institutions serving households)	5.36431e+11	5.49987e+11	5.71284e+11	5.88547e+11	6.06711e+11	6.29697e+11	6.56873e+11	6.86361e+11	7.06489e+11	7.09174e+11	7.33863e+11	7.51398e+11	7.66749e+11	7.86107e+11
Canada	General government final consumption expenditure	1.98264e+11	2.04764e+11	2.09273e+11	2.15289e+11	2.19642e+11	2.23077e+11	2.3001e+11	2.36378e+11	2.47257e+11	2.55433e+11	2.62446e+11	2.64584e+11	2.67884e+11	2.68983e+11
Canada	Gross capital formation	2.05587e+11	1.98014e+11	2.01372e+11	2.19134e+11	2.37814e+11	2.65638e+11	2.81679e+11	2.90361e+11	2.93855e+11	2.5102e+11	2.8396e+11	3.08107e+11	3.19996e+11	3.22451e+11
Canada	Gross fixed capital formation (including Acquisitions less disposals of valuables)	1.9306e+11	2.01833e+11	2.03869e+11	2.14805e+11	2.33424e+11	2.56317e+11	2.74468e+11	2.84216e+11	2.8886e+11	2.56088e+11	2.85487e+11	2.99406e+11	3.1348e+11	3.14428e+11
Canada	Changes in inventories	1.21419e+10	-3.03979e+09	-1.80544e+09	4.57229e+09	4.67599e+09	9.3203e+09	7.40468e+09	6.43678e+09	5.37959e+09	-4.06386e+09	-6.95674e+08	8.85364e+09	6.85736e+09	8.26095e+09
Canada	Exports of goods and services	4.12934e+11	3.98363e+11	4.02545e+11	3.96889e+11	4.2046e+11	4.3028e+11	4.34045e+11	4.38936e+11	4.19713e+11	3.64492e+11	3.87144e+11	4.05246e+11	4.16911e+11	4.22872e+11
Canada	Imports of goods and services	3.2708e+11	3.09967e+11	3.15709e+11	3.29362e+11	3.58075e+11	3.84903e+11	4.07675e+11	4.32547e+11	4.36193e+11	3.82584e+11	4.34351e+11	4.61197e+11	4.81202e+11	4.88397e+11
Canada	Gross Domestic Product (GDP)	1.0306e+12	1.04501e+12	1.0732e+12	1.09459e+12	1.12814e+12	1.16418e+12	1.19226e+12	1.21855e+12	1.23197e+12	1.19588e+12	1.235e+12	1.27075e+12	1.29419e+12	1.31472e+12	2.05283e+10
Canada	Agriculture, hunting, forestry, fishing (ISIC A-B)	1.86966e+10	1.69541e+10	1.60494e+10	1.77747e+10	1.93974e+10	2.00037e+10	1.97095e+10	1.9221e+10	2.11455e+10	1.96205e+10	1.99328e+10	2.0594e+10	2.07335e+10	2.11961e+10
Canada	Mining, Manufacturing, Utilities (ISIC C-E)	2.78893e+11	2.70764e+11	2.75931e+11	2.77385e+11	2.82344e+11	2.87272e+11	2.87269e+11	2.87156e+11	2.79702e+11	2.48432e+11	2.63291e+11	2.73606e+11	2.7601e+11	2.8125e+11
Canada	Manufacturing (ISIC D)	1.64686e+11	1.56891e+11	1.58226e+11	1.56573e+11	1.59831e+11	1.62478e+11	1.59866e+11	1.5807e+11	1.50161e+11	1.30249e+11	1.366e+11	1.41203e+11	1.43127e+11	1.45635e+11
Canada	Construction (ISIC F)	5.03038e+10	5.3946e+10	5.62658e+10	5.81482e+10	6.14837e+10	6.44277e+10	6.71711e+10	6.98716e+10	7.25791e+10	7.01244e+10	7.59902e+10	7.83915e+10	8.24634e+10	8.19237e+10
Canada	Wholesale, retail trade, restaurants and hotels (ISIC G-H)	1.23804e+11	1.29521e+11	1.35125e+11	1.39195e+11	1.44626e+11	1.50901e+11	1.58336e+11	1.65625e+11	1.65829e+11	1.61176e+11	1.6747e+11	1.72017e+11	1.75376e+11	1.78136e+11
Canada	Transport, storage and communication (ISIC I)	6.62177e+10	6.88075e+10	7.02031e+10	7.11109e+10	7.40723e+10	7.79168e+10	8.06476e+10	8.24166e+10	8.41948e+10	8.13733e+10	8.43025e+10	8.69246e+10	8.84821e+10	8.98541e+10
Canada	Other Activities (ISIC J-P)	4.22115e+11	4.35326e+11	4.4739e+11	4.59062e+11	4.72196e+11	4.86271e+11	5.05623e+11	5.2312e+11	5.34962e+11	5.40668e+11	5.51109e+11	5.62923e+11	5.7281e+11	5.83661e+11
Canada	Total Value Added	9.62927e+11	9.76484e+11	1.00219e+12	1.02341e+12	1.05511e+12	1.08679e+12	1.11717e+12	1.14189e+12	1.15387e+12	1.11979e+12	1.15944e+12	1.19118e+12	1.21304e+12	1.23344e+12
Cayman Islands	Final consumption expenditure	2.11547e+09	2.12823e+09	2.16501e+09	2.20794e+09	2.22765e+09	2.37242e+09	2.48173e+09	2.56017e+09	2.55095e+09	2.36727e+09	2.30301e+09	2.32302e+09	2.35521e+09	2.38785e+09
Cayman Islands	Household consumption expenditure (including Non-profit institutions serving households)	1.71832e+09	1.72881e+09	1.75907e+09	1.79388e+09	1.80976e+09	1.92734e+09	2.0162e+09	2.07998e+09	2.07245e+09	1.92321e+09	1.87101e+09	1.88727e+09	1.91343e+09	1.93994e+09
Cayman Islands	General government final consumption expenditure	3.97147e+08	3.99417e+08	4.05946e+08	4.14067e+08	4.17894e+08	4.45087e+08	4.65531e+08	4.80198e+08	4.785e+08	4.44066e+08	4.32008e+08	4.3575e+08	4.41786e+08	4.47914e+08
Cayman Islands	Gross capital formation	6.07599e+08	6.11972e+08	6.22787e+08	6.34842e+08	6.40277e+08	6.82013e+08	7.13564e+08	7.36106e+08	7.33385e+08	6.80563e+08	6.62119e+08	6.67884e+08	6.77129e+08	6.86504e+08
Cayman Islands	Gross fixed capital formation (including Acquisitions less disposals of valuables)	6.07599e+08	6.11972e+08	6.22787e+08	6.34842e+08	6.40277e+08	6.82013e+08	7.13564e+08	7.36106e+08	7.33385e+08	6.80563e+08	6.62119e+08	6.67884e+08	6.77129e+08	6.86504e+08
Cayman Islands	Exports of goods and services	1.6805e+09	1.68926e+09	1.71992e+09	1.75309e+09	1.76894e+09	1.884e+09	1.97067e+09	2.03313e+09	2.02566e+09	1.87985e+09	1.82883e+09	1.84471e+09	1.87028e+09	1.89618e+09
Cayman Islands	Imports of goods and services	1.65702e+09	1.67122e+09	1.70426e+09	1.73473e+09	1.74904e+09	1.86309e+09	1.94994e+09	2.0118e+09	2.00386e+09	1.8595e+09	1.80919e+09	1.82503e+09	1.85028e+09	1.87582e+09
Cayman Islands	Gross Domestic Product (GDP)	2.71316e+09	2.72826e+09	2.77533e+09	2.83083e+09	2.85625e+09	3.04176e+09	3.18171e+09	3.28234e+09	3.27061e+09	3.03511e+09	2.95269e+09	2.97833e+09	3.01961e+09	3.06147e+09	4.18566e+07
Cayman Islands	Agriculture, hunting, forestry, fishing (ISIC A-B)	7.15526e+06	7.19346e+06	7.347e+06	7.43893e+06	7.52585e+06	8.14908e+06	8.17554e+06	8.71788e+06	9.19584e+06	1.01356e+07	9.98697e+06	1.0292e+07	1.06066e+07	1.05626e+07
Cayman Islands	Mining, Manufacturing, Utilities (ISIC C-E)	1.32306e+08	1.33111e+08	1.35344e+08	1.37967e+08	1.39572e+08	1.48127e+08	1.54788e+08	1.61651e+08	1.57627e+08	1.57697e+08	1.5039e+08	1.48739e+08	1.50394e+08	1.53767e+08
Cayman Islands	Manufacturing (ISIC D)	2.29265e+07	2.30192e+07	2.35552e+07	2.38517e+07	2.39894e+07	2.62732e+07	2.62194e+07	2.73042e+07	3.05908e+07	2.8329e+07	2.52933e+07	2.4848e+07	2.59632e+07	2.603e+07
Cayman Islands	Construction (ISIC F)	1.40574e+08	1.41083e+08	1.43102e+08	1.47661e+08	1.46843e+08	1.55476e+08	1.71686e+08	1.61358e+08	1.64257e+08	1.16157e+08	9.05743e+07	8.84149e+07	8.76106e+07	9.12064e+07
Cayman Islands	Wholesale, retail trade, restaurants and hotels (ISIC G-H)	3.58842e+08	3.60511e+08	3.66739e+08	3.7508e+08	3.76391e+08	4.01972e+08	4.24966e+08	4.25449e+08	4.35875e+08	3.87967e+08	3.76438e+08	3.89478e+08	3.97377e+08	3.97847e+08
Cayman Islands	Transport, storage and communication (ISIC I)	2.08085e+08	2.09182e+08	2.12787e+08	2.17241e+08	2.18803e+08	2.33202e+08	2.4484e+08	2.50099e+08	2.51353e+08	2.46935e+08	2.39527e+08	2.39929e+08	2.42847e+08	2.47064e+08
Cayman Islands	Other Activities (ISIC J-P)	2.12017e+09	2.13331e+09	2.17211e+09	2.20731e+09	2.23759e+09	2.3872e+09	2.45312e+09	2.60743e+09	2.58064e+09	2.37232e+09	2.31475e+09	2.32294e+09	2.3684e+09	2.39635e+09
Cayman Islands	Total Value Added	2.96716e+09	2.98441e+09	3.03745e+09	3.09274e+09	3.12674e+09	3.33413e+09	3.4577e+09	3.61465e+09	3.59888e+09	3.29161e+09	3.18194e+09	3.20004e+09	3.25744e+09	3.29704e+09
Central African Republic	Final consumption expenditure	1.36728e+09	1.38159e+09	1.36389e+09	1.23484e+09	1.3348e+09	1.3668e+09	1.41907e+09	1.4816e+09	1.52054e+09	1.51803e+09	1.5403e+09	1.59609e+09	1.64831e+09	1.14142e+09
Central African Republic	Household consumption expenditure (including Non-profit institutions serving households)	1.0318e+09	1.08646e+09	1.07414e+09	1.02629e+09	1.11762e+09	1.1447e+09	1.1966e+09	1.26876e+09	1.30454e+09	1.3018e+09	1.29763e+09	1.34707e+09	1.39786e+09	9.38879e+08
Central African Republic	General government final consumption expenditure	3.54916e+08	3.0724e+08	3.01441e+08	2.0991e+08	2.17228e+08	2.22091e+08	2.21084e+08	2.08052e+08	2.10681e+08	2.11018e+08	2.41362e+08	2.47252e+08	2.47474e+08	2.05472e+08
Central African Republic	Gross capital formation	1.85293e+08	1.7244e+08	1.61088e+08	9.96628e+07	1.08911e+08	1.59896e+08	1.63639e+08	1.71399e+08	1.79107e+08	1.67645e+08	2.02196e+08	2.00922e+08	2.14404e+08	7.57016e+07
Central African Republic	Gross fixed capital formation (including Acquisitions less disposals of valuables)	1.806e+08	1.68072e+08	1.57008e+08	9.71387e+07	1.06153e+08	1.55846e+08	1.53887e+08	1.61126e+08	1.61354e+08	1.51028e+08	1.66508e+08	1.58466e+08	1.75279e+08	6.18873e+07
Central African Republic	Changes in inventories	4.69275e+06	4.36721e+06	4.07972e+06	2.52407e+06	2.75829e+06	4.04953e+06	1.09209e+07	1.1509e+07	2.05074e+07	1.91949e+07	4.20581e+07	5.02438e+07	4.61471e+07	1.62936e+07
Central African Republic	Exports of goods and services	3.19989e+08	2.7116e+08	2.50755e+08	2.66342e+08	2.10053e+08	2.03292e+08	2.31163e+08	2.51987e+08	2.48281e+08	2.53893e+08	2.71792e+08	2.78967e+08	2.99611e+08	2.14958e+08
Central African Republic	Imports of goods and services	3.81462e+08	3.42627e+08	3.03934e+08	2.52415e+08	2.77372e+08	3.17177e+08	3.32513e+08	3.62521e+08	3.66458e+08	3.24755e+08	3.40733e+08	3.50206e+08	3.85226e+08	2.86044e+08
Central African Republic	Gross Domestic Product (GDP)	1.4444e+09	1.45351e+09	1.44464e+09	1.34277e+09	1.37994e+09	1.41281e+09	1.47997e+09	1.53963e+09	1.57986e+09	1.60999e+09	1.66737e+09	1.70139e+09	1.75071e+09	1.12045e+09	-6.30253e+08
Central African Republic	Agriculture, hunting, forestry, fishing (ISIC A-B)	5.79646e+08	6.10542e+08	6.07441e+08	5.9276e+08	6.0497e+08	6.06947e+08	6.21867e+08	6.38073e+08	6.45143e+08	6.42347e+08	6.60133e+08	6.98971e+08	7.13903e+08	4.53603e+08
Central African Republic	Mining, Manufacturing, Utilities (ISIC C-E)	2.28708e+08	2.33011e+08	2.29877e+08	2.08569e+08	2.13705e+08	2.2502e+08	2.43023e+08	2.66752e+08	2.747e+08	2.77656e+08	2.8237e+08	2.92312e+08	3.03976e+08	1.92265e+08
Central African Republic	Manufacturing (ISIC D)	1.54497e+08	1.57105e+08	1.59147e+08	1.48007e+08	1.49487e+08	1.56961e+08	1.72101e+08	1.94181e+08	2.04478e+08	2.10612e+08	2.15877e+08	2.22354e+08	2.29026e+08	1.46025e+08
Central African Republic	Construction (ISIC F)	2.37248e+07	2.45314e+07	2.45314e+07	2.45314e+07	2.47767e+07	2.552e+07	2.61153e+07	2.28157e+07	3.32162e+07	3.43788e+07	3.54102e+07	3.82784e+07	3.96182e+07	2.47864e+07
Central African Republic	Wholesale, retail trade, restaurants and hotels (ISIC G-H)	1.93969e+08	1.97243e+08	1.92312e+08	1.81735e+08	1.85369e+08	1.94823e+08	2.00279e+08	2.04246e+08	2.05739e+08	2.10266e+08	2.16574e+08	2.36065e+08	2.38427e+08	1.51196e+08
Central African Republic	Transport, storage and communication (ISIC I)	3.5877e+07	3.47095e+07	3.52386e+07	3.33005e+07	3.39665e+07	3.53443e+07	3.8008e+07	4.5321e+07	5.05777e+07	5.16904e+07	5.32411e+07	5.90977e+07	5.96885e+07	3.76323e+07
Central African Republic	Other Activities (ISIC J-P)	3.72168e+08	3.30965e+08	3.22318e+08	2.55727e+08	2.55055e+08	2.6208e+08	2.75699e+08	2.80497e+08	2.82201e+08	2.99485e+08	3.01871e+08	2.74651e+08	3.11037e+08	1.94263e+08
Central African Republic	Total Value Added	1.42785e+09	1.42707e+09	1.40821e+09	1.29561e+09	1.31718e+09	1.34973e+09	1.40568e+09	1.45998e+09	1.49675e+09	1.52055e+09	1.55464e+09	1.60749e+09	1.67346e+09	1.05811e+09
Chad	Final consumption expenditure	2.26713e+09	2.24685e+09	2.35493e+09	2.48283e+09	2.61593e+09	2.6954e+09	3.0471e+09	3.18845e+09	3.28269e+09	3.52631e+09	3.93042e+09	3.69016e+09	4.23917e+09	4.24504e+09
Chad	Household consumption expenditure (including Non-profit institutions serving households)	1.32326e+09	1.28069e+09	1.29805e+09	1.35209e+09	1.41181e+09	1.45971e+09	1.63727e+09	1.7337e+09	1.78272e+09	1.85224e+09	2.15786e+09	2.13197e+09	2.27481e+09	2.20429e+09
Chad	General government final consumption expenditure	9.2811e+08	9.55623e+08	1.05313e+09	1.1295e+09	1.20492e+09	1.23569e+09	1.41196e+09	1.4536e+09	1.49915e+09	1.68355e+09	1.76773e+09	1.53615e+09	1.96781e+09	2.05636e+09
Chad	Gross capital formation	3.11941e+08	9.68846e+08	1.60255e+09	1.49342e+09	1.3267e+09	1.47549e+09	1.12099e+09	1.10558e+09	1.08171e+09	1.19637e+09	1.4811e+09	1.51072e+09	1.76604e+09	1.955e+09
Chad	Gross fixed capital formation (including Acquisitions less disposals of valuables)	2.68405e+08	7.43772e+08	1.37697e+09	1.21953e+09	1.12649e+09	1.18981e+09	9.85439e+08	9.68271e+08	9.22696e+08	1.0205e+09	1.26338e+09	1.28865e+09	1.50643e+09	1.66762e+09
Chad	Changes in inventories	1.02621e+07	2.99056e+08	5.84207e+07	2.43801e+08	8.83887e+07	2.85677e+08	-2.52497e+07	-1.41529e+07	5.95045e+07	6.5812e+07	8.14753e+07	8.31048e+07	9.71495e+07	1.07544e+08
Chad	Exports of goods and services	8.53157e+08	8.07704e+08	8.66856e+08	1.19407e+09	2.91158e+09	3.20248e+09	2.97586e+09	2.69437e+09	2.55508e+09	2.59852e+09	2.67128e+09	2.61785e+09	2.44246e+09	2.40826e+09
Chad	Imports of goods and services	7.8082e+08	1.10182e+09	1.59909e+09	1.459e+09	1.4266e+09	1.49999e+09	1.37051e+09	1.33195e+09	1.3095e+09	1.41818e+09	1.61957e+09	1.50944e+09	1.59245e+09	1.53035e+09
Chad	Gross Domestic Product (GDP)	2.94401e+09	3.28309e+09	3.56259e+09	4.07165e+09	5.44266e+09	5.87338e+09	5.88326e+09	5.89187e+09	5.91186e+09	6.15425e+09	6.96661e+09	7.00841e+09	7.64617e+09	7.90614e+09	2.5997e+08
Chad	Agriculture, hunting, forestry, fishing (ISIC A-B)	1.00207e+09	1.10354e+09	1.09716e+09	1.15411e+09	1.08987e+09	1.22203e+09	1.29815e+09	1.2819e+09	1.36298e+09	1.26485e+09	1.68604e+09	1.32186e+09	1.83738e+09	1.75103e+09
Chad	Mining, Manufacturing, Utilities (ISIC C-E)	4.84779e+08	5.55924e+08	6.96507e+08	1.13906e+09	2.917e+09	3.0368e+09	2.82095e+09	2.64668e+09	2.46634e+09	2.46773e+09	2.62374e+09	2.67863e+09	2.6398e+09	2.64155e+09
Chad	Manufacturing (ISIC D)	2.25609e+08	2.59326e+08	3.26373e+08	3.27991e+08	2.90435e+08	3.32486e+08	3.3593e+08	3.20091e+08	3.34092e+08	3.63492e+08	3.99841e+08	4.34627e+08	4.42885e+08	4.72115e+08
Chad	Construction (ISIC F)	2.85182e+07	3.21057e+07	3.66872e+07	4.52533e+07	5.22879e+07	5.86295e+07	5.8056e+07	6.6147e+07	6.74464e+07	7.75633e+07	8.76466e+07	8.93995e+07	1.05491e+08	1.16041e+08
Chad	Wholesale, retail trade, restaurants and hotels (ISIC G-H)	4.38348e+08	4.80353e+08	5.40095e+08	5.67089e+08	6.06938e+08	6.3807e+08	6.64617e+08	6.99612e+08	7.13471e+08	7.71976e+08	9.07072e+08	9.17957e+08	1.03821e+09	1.08181e+09
Chad	Transport, storage and communication (ISIC I)	6.4218e+07	8.81509e+07	9.7645e+07	8.66924e+07	8.83401e+07	1.02424e+08	1.06501e+08	1.11248e+08	1.13484e+08	1.2279e+08	1.36665e+08	1.50878e+08	1.48917e+08	1.62766e+08
Chad	Other Activities (ISIC J-P)	4.27487e+08	4.68886e+08	5.02222e+08	5.62695e+08	6.16762e+08	6.91154e+08	7.08422e+08	7.51061e+08	7.67757e+08	8.11865e+08	8.21872e+08	8.5739e+08	9.50318e+08	1.00321e+09
Chad	Total Value Added	2.86424e+09	3.1919e+09	3.44944e+09	3.95843e+09	5.33152e+09	5.74911e+09	5.74523e+09	5.74021e+09	5.74658e+09	5.8291e+09	6.64645e+09	6.3943e+09	7.25781e+09	7.35138e+09
Chile	Final consumption expenditure	6.69664e+10	6.88905e+10	7.06019e+10	7.33648e+10	7.9242e+10	8.56013e+10	9.20624e+10	9.90096e+10	1.03357e+11	1.04152e+11	1.14325e+11	1.23269e+11	1.30187e+11	1.37182e+11
Chile	Household consumption expenditure (including Non-profit institutions serving households)	5.62122e+10	5.78203e+10	5.9185e+10	6.16851e+10	6.68766e+10	7.2529e+10	7.81743e+10	8.41534e+10	8.85123e+10	8.78167e+10	9.73224e+10	1.05937e+11	1.12256e+11	1.1853e+11
Chile	General government final consumption expenditure	1.07078e+10	1.1022e+10	1.13612e+10	1.16379e+10	1.23423e+10	1.30723e+10	1.39031e+10	1.48794e+10	1.49267e+10	1.62976e+10	1.70427e+10	1.74626e+10	1.81019e+10	1.88538e+10
Chile	Gross capital formation	1.82825e+10	1.84334e+10	1.8837e+10	2.03112e+10	2.20292e+10	2.70621e+10	2.95217e+10	3.14103e+10	3.79347e+10	2.90283e+10	3.69549e+10	4.21916e+10	4.68205e+10	4.56284e+10
Chile	Gross fixed capital formation (including Acquisitions less disposals of valuables)	1.72066e+10	1.79509e+10	1.8228e+10	1.92654e+10	2.1467e+10	2.65097e+10	2.76384e+10	3.06221e+10	3.60995e+10	3.17335e+10	3.56069e+10	4.07499e+10	4.5711e+10	4.58899e+10
Chile	Changes in inventories	1.06868e+09	4.8141e+08	6.06688e+08	1.03929e+09	5.60981e+08	5.52404e+08	1.87008e+09	7.86679e+08	1.82429e+09	-2.67129e+09	1.34189e+09	1.43568e+09	1.10793e+09	-2.49167e+08
Chile	Exports of goods and services	3.64382e+10	3.90733e+10	3.97e+10	4.22655e+10	4.81889e+10	4.9554e+10	5.20819e+10	5.58265e+10	5.54357e+10	5.29135e+10	5.41434e+10	5.71301e+10	5.7777e+10	6.02425e+10
Chile	Imports of goods and services	2.41727e+10	2.51601e+10	2.57266e+10	2.82312e+10	3.33985e+10	3.91613e+10	4.36177e+10	4.98465e+10	5.54411e+10	4.64772e+10	5.85004e+10	6.76371e+10	7.09998e+10	7.25719e+10
Chile	Gross Domestic Product (GDP)	9.86576e+10	1.01989e+11	1.04217e+11	1.08299e+11	1.15897e+11	1.23056e+11	1.30063e+11	1.36776e+11	1.41279e+11	1.39815e+11	1.47872e+11	1.56506e+11	1.64929e+11	1.71649e+11	6.72039e+09
Chile	Agriculture, hunting, forestry, fishing (ISIC A-B)	3.10775e+09	3.34184e+09	3.57014e+09	3.66343e+09	4.15164e+09	4.63741e+09	5.09267e+09	5.20934e+09	5.60739e+09	5.29171e+09	5.30646e+09	5.94622e+09	5.89462e+09	6.00026e+09
Chile	Mining, Manufacturing, Utilities (ISIC C-E)	3.4987e+10	3.62066e+10	3.57039e+10	3.7349e+10	3.86037e+10	3.8416e+10	3.98013e+10	3.95027e+10	3.91408e+10	3.87861e+10	3.98251e+10	4.05132e+10	4.21845e+10	4.38213e+10
Chile	Manufacturing (ISIC D)	1.47231e+10	1.48136e+10	1.50937e+10	1.55899e+10	1.6541e+10	1.73493e+10	1.8286e+10	1.87274e+10	1.90219e+10	1.82156e+10	1.86815e+10	2.00982e+10	2.07875e+10	2.08376e+10
Chile	Construction (ISIC F)	5.45378e+09	5.6774e+09	5.81988e+09	6.07159e+09	6.27767e+09	6.88645e+09	7.16754e+09	7.51459e+09	8.33864e+09	7.89342e+09	8.03786e+09	8.58446e+09	9.185e+09	9.48099e+09
Chile	Wholesale, retail trade, restaurants and hotels (ISIC G-H)	8.48084e+09	8.70516e+09	8.78312e+09	9.21079e+09	1.02053e+10	1.13635e+10	1.23513e+10	1.31666e+10	1.38569e+10	1.30585e+10	1.49906e+10	1.68004e+10	1.81085e+10	1.92832e+10
Chile	Transport, storage and communication (ISIC I)	7.42332e+09	7.97308e+09	8.39822e+09	8.88321e+09	9.28701e+09	9.74418e+09	1.02414e+10	1.08701e+10	1.12252e+10	1.06408e+10	1.15768e+10	1.23863e+10	1.32118e+10	1.37076e+10
Chile	Other Activities (ISIC J-P)	3.29618e+10	3.39191e+10	3.48132e+10	3.57406e+10	3.84487e+10	4.1505e+10	4.4124e+10	4.79463e+10	5.04103e+10	5.18091e+10	5.43973e+10	5.79585e+10	6.11922e+10	6.3538e+10
Chile	Total Value Added	9.25685e+10	9.59212e+10	9.71293e+10	1.00942e+11	1.06941e+11	1.12553e+11	1.18729e+11	1.24182e+11	1.28661e+11	1.2763e+11	1.34198e+11	1.42194e+11	1.4985e+11	1.55911e+11
China	Final consumption expenditure	8.57388e+11	9.18668e+11	9.82266e+11	1.04451e+12	1.11984e+12	1.21252e+12	1.33218e+12	1.48031e+12	1.60859e+12	1.76012e+12	1.92193e+12	2.13121e+12	2.31439e+12	2.49711e+12
China	Household consumption expenditure (including Non-profit institutions serving households)	6.39105e+11	6.78507e+11	7.25678e+11	7.75121e+11	8.34173e+11	8.90358e+11	9.72606e+11	1.07841e+12	1.17083e+12	1.28504e+12	1.39365e+12	1.55133e+12	1.68358e+12	1.81354e+12
China	General government final consumption expenditure	2.18283e+11	2.4016e+11	2.56588e+11	2.69386e+11	2.85663e+11	3.2216e+11	3.59575e+11	4.01893e+11	4.37759e+11	4.75087e+11	5.28279e+11	5.79877e+11	6.30809e+11	6.83564e+11
China	Gross capital formation	5.19225e+11	5.79151e+11	6.48388e+11	7.56701e+11	8.5932e+11	9.50132e+11	1.07764e+12	1.23416e+12	1.3685e+12	1.63109e+12	1.82665e+12	2.00073e+12	2.15536e+12	2.34465e+12
China	Gross fixed capital formation (including Acquisitions less disposals of valuables)	5.04347e+11	5.49809e+11	6.20883e+11	7.23272e+11	8.08997e+11	9.05907e+11	1.01967e+12	1.15636e+12	1.26718e+12	1.5539e+12	1.73241e+12	1.88979e+12	2.06143e+12	2.25031e+12
China	Changes in inventories	1.48778e+10	2.93419e+10	2.75046e+10	3.34285e+10	5.0323e+10	4.42246e+10	5.79653e+10	7.78091e+10	1.01315e+11	7.71922e+10	9.42424e+10	1.10944e+11	9.39338e+10	9.43404e+10
China	Exports of goods and services	3.75018e+11	4.17222e+11	5.042e+11	5.96869e+11	7.08829e+11	8.36621e+11	9.89238e+11	1.15958e+12	1.21682e+12	1.15716e+12	1.36944e+12	1.47578e+12	1.55129e+12	1.68678e+12
China	Imports of goods and services	3.08652e+11	3.52103e+11	4.31587e+11	5.25277e+11	6.2818e+11	7.12034e+11	8.25996e+11	9.40326e+11	9.76149e+11	1.01696e+12	1.22133e+12	1.34457e+12	1.42845e+12	1.5802e+12
China	Gross Domestic Product (GDP)	1.43596e+12	1.55515e+12	1.69667e+12	1.8665e+12	2.05502e+12	2.28724e+12	2.57718e+12	2.94314e+12	3.2267e+12	3.52401e+12	3.89088e+12	4.25273e+12	4.57817e+12	4.93069e+12	3.52519e+11
China	Agriculture, hunting, forestry, fishing (ISIC A-B)	2.25587e+11	2.31904e+11	2.38628e+11	2.44594e+11	2.60004e+11	2.73604e+11	2.87284e+11	2.98041e+11	3.1407e+11	3.2721e+11	3.41185e+11	3.55687e+11	3.71866e+11	3.86741e+11
China	Mining, Manufacturing, Utilities (ISIC C-E)	5.62192e+11	6.10935e+11	6.71848e+11	7.57515e+11	8.44705e+11	9.42492e+11	1.05985e+12	1.2141e+12	1.33741e+12	1.44948e+12	1.62068e+12	1.78889e+12	1.92635e+12	2.07275e+12
China	Manufacturing (ISIC D)						7.33655e+11	8.41822e+11	9.80321e+11	1.09464e+12	1.21226e+12	1.37296e+12	1.50802e+12	1.64241e+12	1.75682e+12
China	Construction (ISIC F)	7.74718e+10	8.2727e+10	8.99968e+10	1.00871e+11	1.09072e+11	1.26518e+11	1.48315e+11	1.72321e+11	1.88694e+11	2.23707e+11	2.53838e+11	2.78502e+11	3.04479e+11	3.33405e+11
China	Wholesale, retail trade, restaurants and hotels (ISIC G-H)	1.3846e+11	1.50635e+11	1.64939e+11	1.82172e+11	1.96393e+11	2.2164e+11	2.61249e+11	3.07955e+11	3.52816e+11	3.9093e+11	4.43677e+11	4.94705e+11	5.44079e+11	5.95366e+11
China	Transport, storage and communication (ISIC I)	8.26581e+10	8.99381e+10	9.63471e+10	1.02249e+11	1.17051e+11	1.30166e+11	1.43141e+11	1.60033e+11	1.71754e+11	1.78928e+11	1.96447e+11	2.15836e+11	2.30531e+11	2.4713e+11
China	Other Activities (ISIC J-P)	3.33763e+11	3.71445e+11	4.14937e+11	4.56155e+11	5.01156e+11	5.62478e+11	6.40492e+11	7.46399e+11	8.15166e+11	8.99553e+11	9.72641e+11	1.05519e+12	1.13394e+12	1.22404e+12
China	Total Value Added	1.42716e+12	1.54422e+12	1.68266e+12	1.84696e+12	2.03016e+12	2.2569e+12	2.53784e+12	2.89279e+12	3.17036e+12	3.459e+12	3.81045e+12	4.16457e+12	4.48294e+12	4.827e+12
China: Hong Kong SAR	Final consumption expenditure	1.10402e+11	1.1271e+11	1.12165e+11	1.11068e+11	1.18025e+11	1.21149e+11	1.27641e+11	1.37728e+11	1.40358e+11	1.41003e+11	1.49118e+11	1.60505e+11	1.66995e+11	1.73826e+11
China: Hong Kong SAR	Household consumption expenditure (including Non-profit institutions serving households)	9.52269e+10	9.65691e+10	9.55578e+10	9.40632e+10	1.00789e+11	1.04361e+11	1.10708e+11	1.20264e+11	1.22541e+11	1.2277e+11	1.30277e+11	1.41208e+11	1.47007e+11	1.53376e+11
China: Hong Kong SAR	General government final consumption expenditure	1.51762e+10	1.61372e+10	1.66003e+10	1.69949e+10	1.72306e+10	1.6788e+10	1.69378e+10	1.74732e+10	1.7827e+10	1.8241e+10	1.88525e+10	1.93153e+10	2.00074e+10	2.04723e+10
China: Hong Kong SAR	Gross capital formation	3.76824e+10	3.67091e+10	3.63985e+10	3.72843e+10	3.82286e+10	3.82382e+10	4.14211e+10	4.4574e+10	4.45186e+10	4.48303e+10	4.99073e+10	5.14685e+10	5.31743e+10	5.51467e+10
China: Hong Kong SAR	Gross fixed capital formation (including Acquisitions less disposals of valuables)	3.60444e+10	3.70366e+10	3.55956e+10	3.61347e+10	3.73475e+10	3.88503e+10	4.15962e+10	4.29112e+10	4.35074e+10	4.19989e+10	4.52291e+10	4.98562e+10	5.32373e+10	5.49869e+10
China: Hong Kong SAR	Changes in inventories	1.00184e+09	-4.01365e+08	4.09599e+08	6.53884e+08	4.5728e+08	-6.12164e+08	-3.1361e+08	9.88355e+08	5.219e+08	1.82402e+09	3.12356e+09	9.20833e+08	-2.86791e+08	-1.36112e+08
China: Hong Kong SAR	Exports of goods and services	2.03624e+11	2.01485e+11	2.18738e+11	2.47403e+11	2.87249e+11	3.222e+11	3.54984e+11	3.84238e+11	3.97762e+11	3.61482e+11	4.24993e+11	4.45371e+11	4.53743e+11	4.82797e+11
China: Hong Kong SAR	Imports of goods and services	2.0309e+11	2.01111e+11	2.15274e+11	2.39877e+11	2.74414e+11	3.00018e+11	3.2973e+11	3.59601e+11	3.71278e+11	3.41454e+11	4.03696e+11	4.26314e+11	4.38567e+11	4.6753e+11
China: Hong Kong SAR	Gross Domestic Product (GDP)	1.47644e+11	1.48472e+11	1.50932e+11	1.55545e+11	1.69078e+11	1.81569e+11	1.94338e+11	2.06902e+11	2.11305e+11	2.06108e+11	2.20057e+11	2.30589e+11	2.3416e+11	2.41027e+11	6.86619e+09
China: Hong Kong SAR	Agriculture, hunting, forestry, fishing (ISIC A-B)	1.11714e+08	1.16231e+08	1.14914e+08	1.07667e+08	1.10678e+08	1.09549e+08	1.04185e+08	9.75966e+07	7.93384e+07	7.67973e+07	8.07501e+07	8.10325e+07	7.69465e+07	7.7923e+07
China: Hong Kong SAR	Mining, Manufacturing, Utilities (ISIC C-E)	1.14362e+10	1.08924e+10	1.0445e+10	9.93379e+09	1.01592e+10	1.03537e+10	1.04914e+10	1.05195e+10	1.01795e+10	9.84794e+09	9.98661e+09	1.00552e+10	1.00959e+10	1.00638e+10
China: Hong Kong SAR	Manufacturing (ISIC D)	6.664e+09	6.06768e+09	5.48018e+09	4.90449e+09	5.0187e+09	5.09763e+09	5.18852e+09	5.14442e+09	4.78191e+09	4.39084e+09	4.53779e+09	4.57113e+09	4.53497e+09	4.53897e+09
China: Hong Kong SAR	Construction (ISIC F)	6.53585e+09	6.40063e+09	6.28285e+09	5.98911e+09	5.44482e+09	5.01586e+09	4.55638e+09	4.50171e+09	4.90007e+09	4.53478e+09	5.24413e+09	6.20506e+09	6.7203e+09	6.79524e+09
China: Hong Kong SAR	Wholesale, retail trade, restaurants and hotels (ISIC G-H)	3.51072e+10	3.48924e+10	3.61114e+10	3.8864e+10	4.50186e+10	5.10748e+10	5.55675e+10	5.91367e+10	6.2744e+10	5.66313e+10	6.55587e+10	7.14592e+10	7.27847e+10	7.54286e+10
China: Hong Kong SAR	Transport, storage and communication (ISIC I)	1.583e+10	1.64563e+10	1.72917e+10	1.74832e+10	1.95951e+10	2.07338e+10	2.21336e+10	2.33572e+10	2.36422e+10	2.29044e+10	2.39137e+10	2.52721e+10	2.56726e+10	2.64774e+10
China: Hong Kong SAR	Other Activities (ISIC J-P)	7.68102e+10	7.85248e+10	7.97382e+10	8.1706e+10	8.60164e+10	8.98942e+10	9.456e+10	1.01344e+11	1.02346e+11	1.04854e+11	1.08105e+11	1.11449e+11	1.134e+11	1.16281e+11
China: Hong Kong SAR	Total Value Added	1.4668e+11	1.4831e+11	1.50986e+11	1.55077e+11	1.6677e+11	1.77182e+11	1.87144e+11	1.98829e+11	2.03717e+11	1.99456e+11	2.13113e+11	2.24627e+11	2.28991e+11	2.35334e+11
China: Macao SAR	Final consumption expenditure	3.81656e+09	3.86452e+09	4.07325e+09	4.24395e+09	4.55583e+09	4.86627e+09	5.15396e+09	5.72013e+09	5.98101e+09	6.28567e+09	6.70091e+09	7.34634e+09	7.9405e+09	8.4406e+09
China: Macao SAR	Household consumption expenditure (including Non-profit institutions serving households)	2.8806e+09	2.9277e+09	3.09107e+09	3.19433e+09	3.45826e+09	3.66992e+09	3.89527e+09	4.27078e+09	4.49033e+09	4.59639e+09	4.92961e+09	5.47305e+09	5.95155e+09	6.3267e+09
China: Macao SAR	General government final consumption expenditure	9.35989e+08	9.37e+08	9.82435e+08	1.04954e+09	1.09788e+09	1.19635e+09	1.2588e+09	1.44877e+09	1.49041e+09	1.68734e+09	1.76963e+09	1.87239e+09	1.98846e+09	2.11337e+09
China: Macao SAR	Gross capital formation	8.71064e+08	8.31334e+08	9.44268e+08	1.3977e+09	1.95535e+09	3.11981e+09	4.43888e+09	5.45442e+09	4.68731e+09	3.11254e+09	2.73436e+09	3.37353e+09	3.93623e+09	4.14915e+09
China: Macao SAR	Gross fixed capital formation (including Acquisitions less disposals of valuables)	8.67915e+08	8.35802e+08	9.11283e+08	1.354e+09	1.86861e+09	3.03892e+09	4.31716e+09	5.35156e+09	4.55945e+09	3.08554e+09	2.5665e+09	3.00109e+09	3.59744e+09	3.76496e+09
China: Macao SAR	Changes in inventories	-3.02266e+06	-1.27322e+07	3.56859e+07	4.60673e+07	9.81904e+07	8.08881e+07	1.23819e+08	9.06207e+07	1.29875e+08	9.94881e+06	1.98652e+08	4.62944e+08	4.13957e+08	4.72028e+08
China: Macao SAR	Exports of goods and services	6.28971e+09	6.64471e+09	7.60134e+09	8.73838e+09	1.13171e+10	1.11538e+10	1.25337e+10	1.53522e+10	1.67507e+10	1.64933e+10	2.3816e+10	3.0594e+10	3.27867e+10	3.6707e+10
China: Macao SAR	Imports of goods and services	4.28617e+09	4.48616e+09	5.14542e+09	5.90235e+09	7.04947e+09	7.34734e+09	8.63359e+09	1.11476e+10	1.13934e+10	9.26317e+09	1.19564e+10	1.55351e+10	1.6534e+10	1.77207e+10
China: Macao SAR	Gross Domestic Product (GDP)	6.78666e+09	6.98266e+09	7.60435e+09	8.56134e+09	1.08628e+10	1.17926e+10	1.34933e+10	1.54267e+10	1.59499e+10	1.6223e+10	2.06841e+10	2.5088e+10	2.73809e+10	3.0636e+10	3.25514e+09
China: Macao SAR	Mining, Manufacturing, Utilities (ISIC C-E)	6.80375e+08	6.01369e+08	5.77292e+08	5.80371e+08	5.78029e+08	5.41376e+08	5.62326e+08	4.58278e+08	3.60027e+08	3.01349e+08	2.55018e+08	2.47255e+08	2.6375e+08	3.24919e+08
China: Macao SAR	Manufacturing (ISIC D)	5.24346e+08	4.34181e+08	4.14532e+08	4.05182e+08	4.07088e+08	3.74732e+08	3.9217e+08	3.26643e+08	2.28602e+08	1.61495e+08	1.13382e+08	1.10432e+08	1.23822e+08	1.4711e+08
China: Macao SAR	Construction (ISIC F)	1.2527e+08	1.08345e+08	1.48173e+08	2.56521e+08	3.54024e+08	7.81544e+08	1.37584e+09	1.70977e+09	1.54064e+09	8.9623e+08	7.31058e+08	7.86689e+08	8.2992e+08	9.90681e+08
China: Macao SAR	Wholesale, retail trade, restaurants and hotels (ISIC G-H)	5.17774e+08	5.70147e+08	6.72112e+08	7.16508e+08	9.48553e+08	9.43695e+08	1.0236e+09	1.16739e+09	1.35626e+09	1.54526e+09	1.99457e+09	2.43796e+09	2.72544e+09	2.9936e+09
China: Macao SAR	Transport, storage and communication (ISIC I)	4.02888e+08	3.64931e+08	3.94136e+08	3.52666e+08	4.00884e+08	4.17173e+08	4.31873e+08	4.53493e+08	3.76623e+08	3.93823e+08	4.88527e+08	5.24573e+08	5.25348e+08	6.50652e+08
China: Macao SAR	Other Activities (ISIC J-P)	3.75862e+09	3.83758e+09	4.19881e+09	4.64202e+09	5.45649e+09	6.03977e+09	6.4186e+09	7.53936e+09	7.40007e+09	7.86263e+09	1.0014e+10	1.20437e+10	1.31682e+10	1.47576e+10
China: Macao SAR	Total Value Added	5.48501e+09	5.48245e+09	5.99061e+09	6.54818e+09	7.73809e+09	8.72368e+09	9.81238e+09	1.13285e+10	1.10338e+10	1.09995e+10	1.34833e+10	1.60404e+10	1.75129e+10	1.97177e+10
Colombia	Final consumption expenditure	1.03827e+11	1.05566e+11	1.07156e+11	1.10082e+11	1.14855e+11	1.19764e+11	1.27269e+11	1.36204e+11	1.40904e+11	1.43142e+11	1.50469e+11	1.58735e+11	1.66142e+11	1.74171e+11
Colombia	Household consumption expenditure (including Non-profit institutions serving households)	8.39672e+10	8.52668e+10	8.69726e+10	8.95312e+10	9.29903e+10	9.67669e+10	1.03001e+11	1.10447e+11	1.14315e+11	1.14964e+11	1.2071e+11	1.2792e+11	1.33558e+11	1.38984e+11
Colombia	General government final consumption expenditure	1.98597e+10	2.02996e+10	2.01837e+10	2.05512e+10	2.18646e+10	2.29973e+10	2.4268e+10	2.57567e+10	2.65891e+10	2.81778e+10	2.97596e+10	3.08152e+10	3.2584e+10	3.51873e+10
Colombia	Gross capital formation	1.77897e+10	1.92883e+10	2.12307e+10	2.36415e+10	2.62854e+10	2.96372e+10	3.53239e+10	3.99236e+10	4.35843e+10	4.17893e+10	4.48808e+10	5.33498e+10	5.57287e+10	5.84648e+10
Colombia	Gross fixed capital formation (including Acquisitions less disposals of valuables)	1.68551e+10	1.84938e+10	2.05499e+10	2.29103e+10	2.54602e+10	2.88233e+10	3.40317e+10	3.89438e+10	4.27825e+10	4.22327e+10	4.42854e+10	5.26867e+10	5.51224e+10	5.82416e+10
Colombia	Changes in inventories	9.34578e+08	7.94542e+08	6.8079e+08	7.31203e+08	8.25134e+08	8.13931e+08	1.29221e+09	9.7982e+08	8.01867e+08	-4.43375e+08	5.95476e+08	6.63124e+08	6.06248e+08	2.23196e+08
Colombia	Exports of goods and services	1.97438e+10	2.02987e+10	1.98162e+10	2.12747e+10	2.33614e+10	2.46963e+10	2.68197e+10	2.86716e+10	2.99556e+10	2.91033e+10	2.94713e+10	3.29356e+10	3.49555e+10	3.68256e+10
Colombia	Imports of goods and services	1.89061e+10	2.05586e+10	2.06262e+10	2.23114e+10	2.46032e+10	2.75315e+10	3.30291e+10	3.76684e+10	4.16143e+10	3.78071e+10	4.19073e+10	5.09119e+10	5.54671e+10	5.66331e+10
Colombia	Gross Domestic Product (GDP)	1.22698e+11	1.24756e+11	1.2788e+11	1.32891e+11	1.39978e+11	1.46566e+11	1.56383e+11	1.67174e+11	1.73103e+11	1.75962e+11	1.82951e+11	1.95007e+11	2.02902e+11	2.1154e+11	8.63784e+09
Colombia	Agriculture, hunting, forestry, fishing (ISIC A-B)	9.7508e+09	9.92273e+09	1.03743e+10	1.06949e+10	1.10133e+10	1.13231e+10	1.15915e+10	1.20448e+10	1.19996e+10	1.19211e+10	1.1944e+10	1.21917e+10	1.24934e+10	1.31431e+10
Colombia	Mining, Manufacturing, Utilities (ISIC C-E)	3.14456e+10	3.12862e+10	3.15374e+10	3.27813e+10	3.43493e+10	3.58324e+10	3.77463e+10	3.97336e+10	4.08112e+10	4.10878e+10	4.29936e+10	4.61705e+10	4.68629e+10	4.76872e+10
Colombia	Manufacturing (ISIC D)	1.66595e+10	1.71451e+10	1.75118e+10	1.83693e+10	1.98286e+10	2.07176e+10	2.2127e+10	2.37204e+10	2.3866e+10	2.28758e+10	2.32955e+10	2.44011e+10	2.41267e+10	2.38371e+10
Colombia	Construction (ISIC F)	5.36488e+09	5.66003e+09	6.35806e+09	6.88589e+09	7.62571e+09	8.15009e+09	9.14025e+09	9.90247e+09	1.07759e+10	1.13446e+10	1.1333e+10	1.22667e+10	1.29966e+10	1.42681e+10
Colombia	Wholesale, retail trade, restaurants and hotels (ISIC G-H)	1.42608e+10	1.46762e+10	1.48959e+10	1.54509e+10	1.65466e+10	1.73795e+10	1.87506e+10	2.03035e+10	2.09403e+10	2.08817e+10	2.19641e+10	2.34398e+10	2.44477e+10	2.55094e+10
Colombia	Transport, storage and communication (ISIC I)	7.79935e+09	8.05486e+09	8.2772e+09	8.6512e+09	9.30614e+09	1.0033e+10	1.11132e+10	1.23292e+10	1.28941e+10	1.2726e+10	1.35163e+10	1.44151e+10	1.51221e+10	1.55914e+10
Colombia	Other Activities (ISIC J-P)	4.41811e+10	4.47305e+10	4.58111e+10	4.72093e+10	4.92814e+10	5.14065e+10	5.42309e+10	5.74892e+10	5.96087e+10	6.17916e+10	6.40287e+10	6.73155e+10	7.0691e+10	7.41669e+10
Colombia	Total Value Added	1.12803e+11	1.1433e+11	1.17254e+11	1.21673e+11	1.28122e+11	1.34125e+11	1.42573e+11	1.51803e+11	1.5703e+11	1.59753e+11	1.6578e+11	1.75799e+11	1.82614e+11	1.90366e+11
Comoros	Final consumption expenditure	3.56786e+08	3.66965e+08	3.77829e+08	3.8476e+08	4.02906e+08	4.34164e+08	4.51373e+08	4.58842e+08	4.84553e+08	5.06541e+08	5.16921e+08	5.35804e+08	5.57812e+08	5.80764e+08
Comoros	Household consumption expenditure (including Non-profit institutions serving households)	3.17183e+08	3.10563e+08	3.14655e+08	3.30211e+08	3.49748e+08	3.81983e+08	3.95926e+08	4.02711e+08	4.14389e+08	4.25992e+08	4.2727e+08	4.44361e+08	4.64357e+08	4.85253e+08
Comoros	General government final consumption expenditure	3.96025e+07	5.64024e+07	6.31739e+07	5.45496e+07	5.31588e+07	5.21813e+07	5.54471e+07	5.61314e+07	7.01642e+07	8.05485e+07	8.96505e+07	9.14435e+07	9.34552e+07	9.55113e+07
Comoros	Gross capital formation	3.40649e+07	3.50601e+07	3.99919e+07	3.83569e+07	3.47491e+07	3.60287e+07	3.6122e+07	4.07916e+07	6.39205e+07	7.01847e+07	5.87446e+07	6.22693e+07	6.66281e+07	7.12921e+07
Comoros	Gross fixed capital formation (including Acquisitions less disposals of valuables)	3.40649e+07	3.50601e+07	3.99919e+07	3.83569e+07	3.47491e+07	3.60287e+07	3.6122e+07	4.07916e+07	6.39205e+07	7.01847e+07	5.87446e+07	6.22693e+07	6.66281e+07	7.12921e+07
Comoros	Exports of goods and services	5.64931e+07	5.41336e+07	5.71418e+07	6.52021e+07	5.61243e+07	5.52223e+07	5.56311e+07	5.81327e+07	5.6098e+07	5.22273e+07	6.64853e+07	6.7815e+07	6.91713e+07	7.05547e+07
Comoros	Imports of goods and services	1.0982e+08	1.07394e+08	1.11731e+08	1.16094e+08	1.22453e+08	1.38382e+08	1.51294e+08	1.63997e+08	2.22052e+08	2.20942e+08	2.63584e+08	2.78081e+08	2.9421e+08	3.0892e+08
Comoros	Gross Domestic Product (GDP)	3.37525e+08	3.48762e+08	3.63234e+08	3.72222e+08	3.71329e+08	3.87036e+08	3.91844e+08	3.93768e+08	3.95973e+08	4.00328e+08	4.08335e+08	4.18952e+08	4.3152e+08	4.46926e+08	1.54053e+07
Comoros	Agriculture, hunting, forestry, fishing (ISIC A-B)	1.63878e+08	1.74253e+08	1.82166e+08	1.88147e+08	1.89138e+08	1.97446e+08	1.99899e+08	2.00881e+08	2.17554e+08	2.1081e+08	2.09334e+08	2.17917e+08	2.26851e+08	2.36152e+08
Comoros	Mining, Manufacturing, Utilities (ISIC C-E)	2.07381e+07	2.14845e+07	2.13823e+07	2.18977e+07	2.21242e+07	2.2644e+07	2.29239e+07	2.3035e+07	2.15953e+07	2.84801e+07	3.0936e+07	3.15765e+07	3.22303e+07	3.28976e+07
Comoros	Manufacturing (ISIC D)	1.52954e+07	1.59307e+07	1.58507e+07	1.62461e+07	1.64016e+07	1.68503e+07	1.70591e+07	1.71391e+07	1.64364e+07	2.24028e+07	2.36797e+07	2.41533e+07	2.46364e+07	2.51291e+07
Comoros	Construction (ISIC F)	1.81447e+07	1.93845e+07	2.07088e+07	2.54461e+07	2.31708e+07	1.99089e+07	2.01578e+07	2.02556e+07	2.29901e+07	1.8576e+07	2.18453e+07	2.27628e+07	2.37189e+07	2.47151e+07
Comoros	Wholesale, retail trade, restaurants and hotels (ISIC G-H)	6.83238e+07	6.69775e+07	6.87192e+07	6.30008e+07	6.32896e+07	6.89103e+07	6.97634e+07	7.011e+07	6.02245e+07	6.84752e+07	6.92969e+07	7.22074e+07	7.52401e+07	7.84002e+07
Comoros	Transport, storage and communication (ISIC I)	1.40804e+07	1.44536e+07	1.48357e+07	1.52178e+07	2.51306e+07	3.56698e+07	3.61096e+07	3.62874e+07	3.09531e+07	3.44199e+07	4.22676e+07	4.36624e+07	4.51033e+07	4.65917e+07
Comoros	Other Activities (ISIC J-P)	5.82986e+07	5.90407e+07	6.31287e+07	6.68835e+07	6.14091e+07	6.23911e+07	6.31687e+07	6.34798e+07	6.25383e+07	6.52926e+07	6.62664e+07	6.79679e+07	6.97173e+07	7.15163e+07
Comoros	Total Value Added	3.43463e+08	3.55593e+08	3.7094e+08	3.80591e+08	3.84261e+08	4.0697e+08	4.12022e+08	4.14048e+08	4.15855e+08	4.26055e+08	4.39947e+08	4.56095e+08	4.72862e+08	4.90274e+08
Congo	Final consumption expenditure	1.61868e+09	1.83748e+09	2.02469e+09	2.07924e+09	2.19163e+09	2.27919e+09	2.39791e+09	2.53742e+09	2.70078e+09	2.82835e+09	2.9805e+09	3.2159e+09	3.56533e+09	3.7403e+09
Congo	Household consumption expenditure (including Non-profit institutions serving households)	1.1491e+09	1.37609e+09	1.44576e+09	1.52764e+09	1.5957e+09	1.66247e+09	1.74757e+09	1.90617e+09	2.03011e+09	2.12673e+09	2.26091e+09	2.48407e+09	2.68683e+09	2.80068e+09
Congo	General government final consumption expenditure	4.6258e+08	4.69328e+08	5.7204e+08	5.54047e+08	5.95281e+08	6.1672e+08	6.50011e+08	6.43514e+08	6.83999e+08	7.15737e+08	7.38845e+08	7.62488e+08	8.97613e+08	9.55682e+08
Congo	Gross capital formation	1.01096e+09	1.05032e+09	9.61091e+08	9.96784e+08	1.11226e+09	1.49353e+09	1.95202e+09	2.35823e+09	2.4677e+09	2.69431e+09	3.44944e+09	3.90781e+09	4.99826e+09	5.4158e+09
Congo	Gross fixed capital formation (including Acquisitions less disposals of valuables)	9.93016e+08	1.0527e+09	9.12202e+08	9.69247e+08	1.07858e+09	1.46983e+09	1.94378e+09	2.35049e+09	2.46156e+09	2.58924e+09	3.47113e+09	3.93239e+09	5.02969e+09	5.44985e+09
Congo	Changes in inventories	1.74009e+07	3.02625e+06	3.93412e+07	2.421e+07	2.91276e+07	2.36981e+07	1.46928e+07	1.61621e+07	1.55095e+07	8.73829e+07
Congo	Exports of goods and services	4.72722e+09	4.51801e+09	4.53167e+09	4.26867e+09	4.28062e+09	4.81974e+09	4.94923e+09	4.09618e+09	4.49553e+09	4.50413e+09	4.82502e+09	4.54267e+09	4.3043e+09	4.10419e+09
Congo	Imports of goods and services	1.90021e+09	2.00644e+09	2.03231e+09	1.97042e+09	2.10806e+09	2.50555e+09	2.85447e+09	3.05031e+09	3.30897e+09	3.29973e+09	3.86026e+09	4.25837e+09	5.37692e+09	5.68231e+09
Congo	Gross Domestic Product (GDP)	4.98849e+09	5.17853e+09	5.41585e+09	5.45961e+09	5.65453e+09	6.08692e+09	6.4668e+09	6.36376e+09	6.74108e+09	7.24671e+09	7.87824e+09	8.14552e+09	8.45741e+09	8.73412e+09	2.76707e+08
Congo	Agriculture, hunting, forestry, fishing (ISIC A-B)	2.03007e+08	2.19294e+08	2.38104e+08	2.53014e+08	2.65171e+08	2.76721e+08	2.91747e+08	3.06231e+08	3.22649e+08	3.12884e+08	3.32314e+08	3.5604e+08	3.81922e+08	4.12082e+08
Congo	Mining, Manufacturing, Utilities (ISIC C-E)	3.9277e+09	3.78348e+09	3.83834e+09	3.68349e+09	3.75782e+09	4.19002e+09	4.48691e+09	3.98699e+09	4.27092e+09	4.82374e+09	5.38793e+09	5.30429e+09	5.05243e+09	4.82776e+09
Congo	Manufacturing (ISIC D)	1.30559e+08	1.61279e+08	1.88707e+08	2.07633e+08	2.25187e+08	2.43427e+08	2.63038e+08	2.86626e+08	3.06649e+08	3.2338e+08	3.42428e+08	3.71926e+08	4.03744e+08	4.40081e+08
Congo	Construction (ISIC F)	1.48308e+08	1.67246e+08	1.65871e+08	1.70749e+08	1.75628e+08	1.85385e+08	1.99045e+08	2.19535e+08	2.36164e+08	2.56612e+08	2.79194e+08	3.08509e+08	3.40902e+08	3.75675e+08
Congo	Wholesale, retail trade, restaurants and hotels (ISIC G-H)	2.61986e+08	2.90671e+08	3.3083e+08	3.47403e+08	3.62383e+08	3.78328e+08	4.00629e+08	4.29314e+08	4.55067e+08	4.89233e+08	5.25436e+08	5.73776e+08	6.28285e+08	6.86087e+08
Congo	Transport, storage and communication (ISIC I)	1.58427e+08	1.85661e+08	2.19703e+08	2.43533e+08	2.61339e+08	2.77281e+08	2.94858e+08	3.19211e+08	3.40946e+08	3.61633e+08	3.86587e+08	4.22235e+08	4.60492e+08	5.02302e+08
Congo	Other Activities (ISIC J-P)	5.24722e+08	5.63309e+08	5.76831e+08	5.97279e+08	6.22675e+08	6.5331e+08	6.87022e+08	7.23265e+08	7.48001e+08	7.75375e+08	8.05667e+08	8.4281e+08	9.51571e+08	1.0139e+09
Congo	Total Value Added	4.88802e+09	5.02522e+09	5.27819e+09	5.33573e+09	5.52794e+09	5.96104e+09	6.3376e+09	6.22944e+09	6.60252e+09	7.10454e+09	7.70661e+09	7.95945e+09	8.25194e+09	8.50699e+09
Cook Islands	Final consumption expenditure	1.23524e+08	1.22202e+08	1.292e+08	1.36937e+08	1.44268e+08	1.3757e+08	1.47006e+08	1.36659e+08	1.48086e+08	1.13114e+08	1.16188e+08	1.24924e+08	1.22874e+08	1.29271e+08
Cook Islands	Household consumption expenditure (including Non-profit institutions serving households)	6.83664e+07	6.3938e+07	6.9863e+07	8.0249e+07	8.58714e+07	7.32898e+07	8.44846e+07	7.85305e+07	8.69325e+07	6.5566e+07	6.74312e+07	7.28011e+07	7.13882e+07	7.51582e+07
Cook Islands	General government final consumption expenditure	5.5158e+07	5.82635e+07	5.93372e+07	5.66877e+07	5.8397e+07	6.42802e+07	6.25219e+07	5.81287e+07	6.11533e+07	4.75477e+07	4.87569e+07	5.21227e+07	5.14857e+07	5.41128e+07
Cook Islands	Gross capital formation	2.22586e+07	2.08169e+07	2.27459e+07	2.61274e+07	2.79579e+07	2.38616e+07	2.75064e+07	2.55679e+07	2.83034e+07	2.13469e+07	2.19542e+07	2.37025e+07	2.32425e+07	2.44699e+07
Cook Islands	Gross fixed capital formation (including Acquisitions less disposals of valuables)	2.22586e+07	2.08169e+07	2.27459e+07	2.61274e+07	2.79579e+07	2.38616e+07	2.75064e+07	2.55679e+07	2.83034e+07	2.13469e+07	2.19542e+07	2.37025e+07	2.32425e+07	2.44699e+07
Cook Islands	Exports of goods and services	1.18515e+08	1.30297e+08	1.2153e+08	1.32834e+08	1.21279e+08	1.32988e+08	1.48889e+08	1.46688e+08	1.51115e+08	1.45049e+08	1.38138e+08	1.43742e+08	1.48025e+08	1.52642e+08
Cook Islands	Imports of goods and services	1.09652e+08	1.11054e+08	1.05343e+08	1.17739e+08	1.08842e+08	1.11862e+08	1.31709e+08	1.17608e+08	1.4292e+08	9.29901e+07	9.53002e+07	1.09616e+08	1.03345e+08	1.0948e+08
Cook Islands	Gross Domestic Product (GDP)	1.61203e+08	1.6779e+08	1.73226e+08	1.80686e+08	1.84663e+08	1.82558e+08	1.91693e+08	1.91307e+08	1.84584e+08	1.86519e+08	1.8098e+08	1.82752e+08	1.90797e+08	1.96903e+08	6.10551e+06
Cook Islands	Agriculture, hunting, forestry, fishing (ISIC A-B)	1.76774e+07	1.44879e+07	1.41065e+07	1.6947e+07	1.36022e+07	1.31298e+07	1.2233e+07	1.28683e+07	1.15937e+07	1.24295e+07	1.26661e+07	1.18134e+07	1.21956e+07	1.30315e+07
Cook Islands	Mining, Manufacturing, Utilities (ISIC C-E)	9.63746e+06	1.00003e+07	1.05039e+07	1.09502e+07	1.15887e+07	1.13922e+07	1.09204e+07	1.13134e+07	1.16381e+07	1.1338e+07	1.08243e+07	1.05979e+07	1.00261e+07	1.11807e+07
Cook Islands	Manufacturing (ISIC D)	6.39833e+06	6.61624e+06	6.88495e+06	7.15233e+06	7.68708e+06	7.48655e+06	6.94324e+06	7.15233e+06	7.48655e+06	7.28602e+06	6.68442e+06	6.48389e+06	6.01598e+06	6.82231e+06
Cook Islands	Construction (ISIC F)	5.15477e+06	5.91171e+06	5.85159e+06	7.47725e+06	7.91929e+06	6.8606e+06	7.89536e+06	8.37261e+06	8.51182e+06	8.39323e+06	7.23265e+06	9.60212e+06	1.24541e+07	1.03557e+07
Cook Islands	Wholesale, retail trade, restaurants and hotels (ISIC G-H)	5.28069e+07	5.43479e+07	5.69762e+07	5.98664e+07	6.84944e+07	6.41285e+07	6.70636e+07	6.89919e+07	6.78211e+07	6.81548e+07	6.78842e+07	6.85637e+07	7.21844e+07	7.40745e+07
Cook Islands	Transport, storage and communication (ISIC I)	2.73779e+07	3.05129e+07	3.03465e+07	3.09367e+07	2.81439e+07	2.99641e+07	3.44153e+07	3.13108e+07	2.72661e+07	2.62043e+07	2.5551e+07	2.4971e+07	2.5247e+07	2.69194e+07
Cook Islands	Other Activities (ISIC J-P)	5.40064e+07	5.87816e+07	6.21787e+07	6.20596e+07	6.28479e+07	6.51578e+07	6.70698e+07	6.62131e+07	6.63693e+07	7.09041e+07	6.74795e+07	6.75624e+07	6.78971e+07	7.20933e+07
Cook Islands	Total Value Added	1.65911e+08	1.73566e+08	1.79665e+08	1.87563e+08	1.92632e+08	1.90633e+08	1.9963e+08	1.99129e+08	1.93436e+08	1.97717e+08	1.92005e+08	1.93398e+08	2.00157e+08	2.07944e+08
Costa Rica	Final consumption expenditure	1.41092e+10	1.43185e+10	1.47442e+10	1.5154e+10	1.55881e+10	1.61971e+10	1.70732e+10	1.82543e+10	1.89019e+10	1.93286e+10	2.0201e+10	2.1031e+10	2.18561e+10	2.25464e+10
Costa Rica	Household consumption expenditure (including Non-profit institutions serving households)	1.15999e+10	1.17368e+10	1.2098e+10	1.24881e+10	1.28733e+10	1.3442e+10	1.42137e+10	1.52821e+10	1.58089e+10	1.60786e+10	1.6801e+10	1.75467e+10	1.82966e+10	1.8859e+10
Costa Rica	General government final consumption expenditure	2.56916e+09	2.66177e+09	2.72193e+09	2.71428e+09	2.74946e+09	2.75512e+09	2.83503e+09	2.89945e+09	3.0261e+09	3.22929e+09	3.38012e+09	3.43342e+09	3.47288e+09	3.60661e+09
Costa Rica	Gross capital formation	2.85985e+09	3.76211e+09	4.12943e+09	3.93667e+09	4.3676e+09	4.86075e+09	5.53789e+09	5.46973e+09	6.57473e+09	4.29235e+09	5.72436e+09	6.45789e+09	6.85848e+09	7.22764e+09
Costa Rica	Gross fixed capital formation (including Acquisitions less disposals of valuables)	3.07789e+09	3.15738e+09	3.36445e+09	3.60639e+09	3.58791e+09	3.74057e+09	4.14382e+09	4.89218e+09	5.43263e+09	4.8282e+09	5.09556e+09	5.54931e+09	5.98111e+09	6.68827e+09
Costa Rica	Changes in inventories	-4.8872e+08	5.23794e+08	7.07375e+08	1.52226e+08	7.0969e+08	1.12018e+09	1.43044e+09	3.66779e+08	1.02697e+09	-1.00649e+09	4.15738e+08	7.29686e+08	6.60359e+08	1.91792e+08
Costa Rica	Exports of goods and services	7.55989e+09	6.83408e+09	7.08315e+09	7.93792e+09	8.58486e+09	9.683e+09	1.06783e+10	1.1736e+10	1.14995e+10	1.08071e+10	1.1406e+10	1.20273e+10	1.31731e+10	1.3652e+10
Costa Rica	Imports of goods and services	8.05107e+09	8.15252e+09	8.71355e+09	8.78794e+09	9.58423e+09	1.07759e+10	1.16479e+10	1.21459e+10	1.29399e+10	1.04971e+10	1.22322e+10	1.33073e+10	1.44266e+10	1.50148e+10
Costa Rica	Gross Domestic Product (GDP)	1.6341e+10	1.65169e+10	1.69962e+10	1.80847e+10	1.8855e+10	1.99649e+10	2.17178e+10	2.34412e+10	2.40815e+10	2.38369e+10	2.50178e+10	2.61462e+10	2.74885e+10	2.84498e+10	9.61352e+08
Costa Rica	Agriculture, hunting, forestry, fishing (ISIC A-B)	1.46675e+09	1.48719e+09	1.43865e+09	1.54483e+09	1.55604e+09	1.62278e+09	1.82872e+09	1.93125e+09	1.86874e+09	1.81728e+09	1.93838e+09	1.95013e+09	2.06032e+09	2.05854e+09
Costa Rica	Mining, Manufacturing, Utilities (ISIC C-E)	3.74611e+09	3.45935e+09	3.58387e+09	3.87437e+09	4.02847e+09	4.43889e+09	4.89882e+09	5.21637e+09	5.04052e+09	4.88019e+09	5.06724e+09	5.25164e+09	5.5624e+09	5.77553e+09
Costa Rica	Manufacturing (ISIC D)	3.33498e+09	3.03238e+09	3.1354e+09	3.39969e+09	3.53411e+09	3.91471e+09	4.3392e+09	4.64386e+09	4.47266e+09	4.29779e+09	4.47036e+09	4.64045e+09	4.90324e+09	5.10669e+09
Costa Rica	Construction (ISIC F)	6.53773e+08	7.4788e+08	7.36348e+08	7.71951e+08	8.20285e+08	8.18334e+08	9.67158e+08	1.17273e+09	1.3437e+09	1.30356e+09	1.25051e+09	1.20323e+09	1.27102e+09	1.30106e+09
Costa Rica	Wholesale, retail trade, restaurants and hotels (ISIC G-H)	3.0639e+09	3.12289e+09	3.17247e+09	3.27944e+09	3.40759e+09	3.54401e+09	3.71556e+09	3.96207e+09	4.09619e+09	3.84997e+09	4.01069e+09	4.17116e+09	4.33735e+09	4.47222e+09
Costa Rica	Transport, storage and communication (ISIC I)	1.03139e+09	1.12631e+09	1.26179e+09	1.43484e+09	1.60747e+09	1.76219e+09	1.9477e+09	2.13912e+09	2.30075e+09	2.36925e+09	2.53307e+09	2.74267e+09	2.90367e+09	3.0445e+09
Costa Rica	Other Activities (ISIC J-P)	5.43216e+09	5.66518e+09	5.88381e+09	6.17793e+09	6.42506e+09	6.70731e+09	7.16742e+09	7.6379e+09	8.14879e+09	8.58716e+09	9.06012e+09	9.53936e+09	1.0023e+10	1.05022e+10
Costa Rica	Total Value Added	1.52265e+10	1.53702e+10	1.58655e+10	1.695e+10	1.77571e+10	1.88935e+10	2.05992e+10	2.21525e+10	2.2775e+10	2.26837e+10	2.37535e+10	2.47703e+10	2.60889e+10	2.70619e+10
Côte d'Ivoire	Final consumption expenditure	1.2661e+10	1.42975e+10	1.37632e+10	1.41116e+10	1.37035e+10	1.39944e+10	1.38822e+10	1.45053e+10	1.48776e+10	1.47119e+10	1.50643e+10	1.40633e+10	1.76643e+10	1.80455e+10
Côte d'Ivoire	Household consumption expenditure (including Non-profit institutions serving households)	1.10545e+10	1.26894e+10	1.20747e+10	1.24134e+10	1.19827e+10	1.21889e+10	1.17278e+10	1.22693e+10	1.24928e+10	1.23363e+10	1.26317e+10	1.1794e+10	1.51224e+10	1.57931e+10
Côte d'Ivoire	General government final consumption expenditure	1.61156e+09	1.65184e+09	1.70465e+09	1.72086e+09	1.72946e+09	1.80555e+09	2.08722e+09	2.16863e+09	2.29874e+09	2.28725e+09	2.34214e+09	2.18521e+09	2.49333e+09	2.26644e+09
Côte d'Ivoire	Gross capital formation	2.48351e+09	1.96744e+09	2.03533e+09	1.83988e+09	2.101e+09	1.93534e+09	1.89622e+09	1.85882e+09	2.11517e+09	2.43071e+09	2.48904e+09	2.1879e+09	3.84809e+09	6.12025e+09
Côte d'Ivoire	Gross fixed capital formation (including Acquisitions less disposals of valuables)	1.91222e+09	1.71144e+09	1.77818e+09	1.5968e+09	1.65907e+09	1.56616e+09	1.48942e+09	1.55645e+09	1.77435e+09	1.87371e+09	1.91868e+09	1.65967e+09	3.18988e+09	5.30475e+09
Côte d'Ivoire	Changes in inventories	4.38438e+08	4.18482e+08	4.35704e+08	3.9002e+08	3.85886e+08	3.69179e+08	3.45399e+08	3.7348e+08	4.26165e+08	4.29895e+08	4.40213e+08	3.77224e+08	7.61497e+08	1.29488e+09
Côte d'Ivoire	Exports of goods and services	7.87405e+09	7.43329e+09	7.59925e+09	7.19173e+09	8.21297e+09	8.52506e+09	8.66998e+09	8.45324e+09	8.59152e+09	9.50222e+09	9.73028e+09	9.41891e+09	1.04644e+10	1.13434e+10
Côte d'Ivoire	Imports of goods and services	5.88382e+09	6.54871e+09	6.53985e+09	6.50834e+09	7.21125e+09	7.3699e+09	7.23724e+09	7.31686e+09	7.66917e+09	8.06797e+09	8.26159e+09	7.55111e+09	1.20818e+10	1.37853e+10
Côte d'Ivoire	Gross Domestic Product (GDP)	1.70856e+10	1.71054e+10	1.68202e+10	1.6591e+10	1.67955e+10	1.70849e+10	1.72042e+10	1.74806e+10	1.78855e+10	1.85648e+10	1.90098e+10	1.81161e+10	1.98921e+10	2.16843e+10	1.79217e+09
Côte d'Ivoire	Agriculture, hunting, forestry, fishing (ISIC A-B)	3.98118e+09	3.94476e+09	3.77222e+09	3.78329e+09	3.82829e+09	3.86004e+09	3.88996e+09	3.94441e+09	4.00435e+09	4.1671e+09	4.24722e+09	4.29733e+09	4.30516e+09	4.44016e+09
Côte d'Ivoire	Mining, Manufacturing, Utilities (ISIC C-E)	3.35096e+09	3.27101e+09	3.05443e+09	3.2336e+09	3.29246e+09	3.51703e+09	3.67091e+09	3.50925e+09	2.56247e+09	2.74133e+09	2.64906e+09	2.63386e+09	2.54114e+09	2.61563e+09
Côte d'Ivoire	Manufacturing (ISIC D)	2.59918e+09	2.50687e+09	2.34926e+09	2.49105e+09	2.53067e+09	2.70591e+09	2.8246e+09	2.69915e+09	1.97137e+09	2.10893e+09	2.03782e+09	2.02623e+09	1.95487e+09	2.01216e+09
Côte d'Ivoire	Construction (ISIC F)	3.93539e+08	3.39681e+08	3.30335e+08	3.54968e+08	3.53116e+08	3.81212e+08	3.98185e+08	3.79127e+08	2.77513e+08	2.968e+08	2.86631e+08	2.85132e+08	2.75058e+08	2.83098e+08
Côte d'Ivoire	Wholesale, retail trade, restaurants and hotels (ISIC G-H)	1.78181e+09	1.84819e+09	1.80942e+09	1.68672e+09	1.71745e+09	1.71326e+09	1.6759e+09	1.69863e+09	2.20966e+09	2.24646e+09	2.22846e+09	2.05626e+09	2.52486e+09	2.86144e+09
Côte d'Ivoire	Transport, storage and communication (ISIC I)	1.25652e+09	1.28423e+09	1.25786e+09	1.17792e+09	1.19555e+09	1.19336e+09	1.16811e+09	1.18319e+09	1.53947e+09	1.56523e+09	1.5525e+09	1.43261e+09	1.7591e+09	1.99356e+09
Côte d'Ivoire	Other Activities (ISIC J-P)	5.0025e+09	4.91492e+09	4.9126e+09	4.58579e+09	4.63289e+09	4.64365e+09	4.53983e+09	4.59584e+09	5.98444e+09	6.08251e+09	6.03284e+09	5.56771e+09	6.83605e+09	7.74722e+09
Côte d'Ivoire	Total Value Added	1.56799e+10	1.5516e+10	1.49969e+10	1.47838e+10	1.49844e+10	1.53085e+10	1.53928e+10	1.53311e+10	1.61579e+10	1.67057e+10	1.66112e+10	1.59955e+10	1.76688e+10	1.91945e+10
Croatia	Final consumption expenditure	2.90711e+10	2.96422e+10	3.18742e+10	3.2986e+10	3.42389e+10	3.55146e+10	3.68369e+10	3.91676e+10	3.94914e+10	3.74583e+10	3.68911e+10	3.6953e+10	3.60198e+10	3.57506e+10
Croatia	Household consumption expenditure (including Non-profit institutions serving households)	2.15199e+10	2.24105e+10	2.42139e+10	2.51646e+10	2.61699e+10	2.71994e+10	2.80849e+10	2.98423e+10	3.02331e+10	2.79945e+10	2.75797e+10	2.76693e+10	2.68301e+10	2.6511e+10
Croatia	General government final consumption expenditure	7.54222e+09	7.22811e+09	7.65791e+09	7.82017e+09	8.06829e+09	8.31514e+09	8.75039e+09	9.32342e+09	9.25815e+09	9.45533e+09	9.30328e+09	9.27597e+09	9.18049e+09	9.22904e+09
Croatia	Gross capital formation	7.1261e+09	8.10845e+09	9.92052e+09	1.14386e+10	1.19113e+10	1.26886e+10	1.42443e+10	1.50738e+10	1.65653e+10	1.25994e+10	1.07967e+10	1.06386e+10	9.95226e+09	9.79871e+09
Croatia	Gross fixed capital formation (including Acquisitions less disposals of valuables)	7.05464e+09	7.47735e+09	8.53085e+09	1.05344e+10	1.11072e+10	1.15395e+10	1.27071e+10	1.36216e+10	1.48715e+10	1.27358e+10	1.08011e+10	1.05129e+10	1.01704e+10	1.00662e+10
Croatia	Changes in inventories	9.59548e+07	6.35511e+08	1.3687e+09	9.09806e+08	8.15889e+08	1.1491e+09	1.5267e+09	1.44844e+09	1.68559e+09	-8.19226e+07	3.74929e+07	1.61376e+08	-1.70346e+08	-2.18212e+08
Croatia	Exports of goods and services	1.25982e+10	1.38726e+10	1.45291e+10	1.60969e+10	1.70571e+10	1.78465e+10	1.88469e+10	1.94966e+10	1.96508e+10	1.68768e+10	1.79176e+10	1.83205e+10	1.82941e+10	1.88509e+10
Croatia	Imports of goods and services	1.26209e+10	1.41131e+10	1.66781e+10	1.86343e+10	1.96056e+10	2.06335e+10	2.23373e+10	2.36963e+10	2.4634e+10	1.96107e+10	1.91266e+10	1.96027e+10	1.90176e+10	1.96174e+10
Croatia	Gross Domestic Product (GDP)	3.64545e+10	3.77065e+10	3.96848e+10	4.18904e+10	4.36007e+10	4.54161e+10	4.75894e+10	5.00402e+10	5.10677e+10	4.7297e+10	4.64924e+10	4.63616e+10	4.53475e+10	4.49216e+10	-4.25906e+08
Croatia	Agriculture, hunting, forestry, fishing (ISIC A-B)	1.78398e+09	1.82746e+09	1.909e+09	1.77957e+09	1.9531e+09	1.92303e+09	2.08416e+09	2.00905e+09	2.11814e+09	2.06099e+09	1.92421e+09	1.85072e+09	1.57948e+09	1.5546e+09
Croatia	Mining, Manufacturing, Utilities (ISIC C-E)	7.11596e+09	7.16759e+09	7.48728e+09	7.73441e+09	8.04599e+09	8.17205e+09	8.45766e+09	8.82209e+09	8.82846e+09	7.94035e+09	7.75687e+09	7.67507e+09	7.2983e+09	7.15322e+09
Croatia	Manufacturing (ISIC D)	5.078e+09	5.15148e+09	5.38516e+09	5.5889e+09	5.8392e+09	6.00846e+09	6.22473e+09	6.64341e+09	6.70264e+09	5.88089e+09	5.71058e+09	5.70866e+09	5.46745e+09	5.27108e+09
Croatia	Construction (ISIC F)	1.69274e+09	1.81681e+09	1.93757e+09	2.42319e+09	2.71375e+09	2.99034e+09	3.1954e+09	3.34874e+09	3.59126e+09	3.23271e+09	2.72401e+09	2.49164e+09	2.20057e+09	2.10758e+09
Croatia	Wholesale, retail trade, restaurants and hotels (ISIC G-H)	4.15936e+09	4.67762e+09	5.37459e+09	6.07268e+09	6.13633e+09	6.58065e+09	6.96543e+09	7.46049e+09	7.47133e+09	6.53707e+09	6.33032e+09	6.44037e+09	6.26443e+09	6.22934e+09
Croatia	Transport, storage and communication (ISIC I)	2.90751e+09	3.15398e+09	3.21065e+09	3.40738e+09	3.7446e+09	4.00177e+09	4.25472e+09	4.56411e+09	4.71184e+09	4.45592e+09	4.38277e+09	4.30353e+09	4.18088e+09	4.21049e+09
Croatia	Other Activities (ISIC J-P)	1.34079e+10	1.34724e+10	1.37507e+10	1.40836e+10	1.43961e+10	1.47668e+10	1.53108e+10	1.60537e+10	1.65251e+10	1.62593e+10	1.63314e+10	1.66557e+10	1.66429e+10	1.66614e+10
Croatia	Total Value Added	3.1233e+10	3.22335e+10	3.3777e+10	3.55704e+10	3.70264e+10	3.84347e+10	4.02468e+10	4.22157e+10	4.31952e+10	4.04672e+10	3.94544e+10	3.94438e+10	3.82093e+10	3.79544e+10
Cuba	Final consumption expenditure	3.0276e+10	3.13831e+10	3.22416e+10	3.43479e+10	3.56209e+10	36908500000	4.24401e+10	4.43108e+10	4.41818e+10	4.47052e+10	4.73321e+10	4.75814e+10	4.92052e+10	5.0777e+10
Cuba	Household consumption expenditure (including Non-profit institutions serving households)	1.96552e+10	2.04064e+10	2.08414e+10	2.21337e+10	2.24745e+10	22559500000	2.67805e+10	2.71872e+10	2.67067e+10	2.69439e+10	2.90627e+10	2.94697e+10	3.01172e+10	3.12347e+10
Cuba	General government final consumption expenditure	1.03766e+10	1.07167e+10	1.11593e+10	1.19723e+10	1.29974e+10	14349000000	1.54813e+10	1.71017e+10	1.75384e+10	1.78422e+10	1.82414e+10	1.80296e+10	1.90792e+10	1.95002e+10
Cuba	Gross capital formation	3.74672e+09	3.77637e+09	3.36959e+09	3.04482e+09	3.45527e+09	4594500000	5.78867e+09	5.92621e+09	7.22609e+09	5.84995e+09	5.80739e+09	6.22143e+09	6.30076e+09	6.45548e+09
Cuba	Gross fixed capital formation (including Acquisitions less disposals of valuables)	3.57798e+09	3.47645e+09	3.16601e+09	2.95569e+09	3.16939e+09	3821500000	5.50717e+09	5.64012e+09	6.06949e+09	5.86594e+09	5.82327e+09	6.23844e+09	6.31798e+09	6.47313e+09
Cuba	Changes in inventories	1.76127e+08	3.05286e+08	2.09395e+08	9.58911e+07	2.90609e+08	773000000	2.92566e+08	2.97458e+08	1.15754e+09
Cuba	Exports of goods and services	5.20324e+09	5.01601e+09	4.82545e+09	5.10448e+09	6.07655e+09	8962900000	9.08136e+09	1.03345e+10	1.15304e+10	1.18897e+10	1.35305e+10	1.40584e+10	1.39011e+10	1.46199e+10
Cuba	Imports of goods and services	5.50317e+09	5.2966e+09	4.9099e+09	5.50528e+09	6.21987e+09	7822600000	9.42111e+09	9.31729e+09	1.00043e+10	8.50959e+09	1.15458e+10	1.13226e+10	1.10394e+10	1.19562e+10
Cuba	Gross Domestic Product (GDP)	3.33777e+10	3.44398e+10	3.49318e+10	3.62562e+10	3.83485e+10	42644200000	4.77896e+10	5.12601e+10	5.33704e+10	5.41438e+10	5.54369e+10	5.69908e+10	5.87087e+10	6.02857e+10	1.57694e+09
Cuba	Agriculture, hunting, forestry, fishing (ISIC A-B)	2.22212e+09	2.19448e+09	2.3472e+09	2.37319e+09	2.25911e+09	1.9627e+09	1.85699e+09	2.21243e+09	2.22355e+09	2.30316e+09	2.3535e+09	2.40604e+09	2.48944e+09	2.5536e+09
Cuba	Mining, Manufacturing, Utilities (ISIC C-E)	5.10335e+09	5.32602e+09	5.26434e+09	4.92719e+09	4.5839e+09	4386300000	4.52911e+09	5.08153e+09	5.43435e+09	5.41881e+09	5.56286e+09	5.74184e+09	5.89392e+09	6.05848e+09
Cuba	Manufacturing (ISIC D)	4.09662e+09	4.32784e+09	4.18695e+09	3.77807e+09	3.4958e+09	3309500000	3.42423e+09	3.90694e+09	4.25327e+09	4.24864e+09	4.33112e+09	4.48878e+09	4.60589e+09	4.72928e+09
Cuba	Construction (ISIC F)	1.88655e+09	1.80083e+09	1.7624e+09	1.83229e+09	2.00056e+09	2375100000	3.25783e+09	2.99191e+09	3.07151e+09	3.09273e+09	3.19758e+09	3.27414e+09	3.37087e+09	3.46737e+09
Cuba	Wholesale, retail trade, restaurants and hotels (ISIC G-H)	3997820000	4251267500	4416002500	4747705000	4756165000	4925600000	6128565000	5518270000	5747395000	5924350000	6.00123e+09	6.18086e+09	6.38214e+09	6.5393e+09
Cuba	Transport, storage and communication (ISIC I)	2.87644e+09	3.11891e+09	3.12006e+09	3.20552e+09	3.36045e+09	3636500000	3.97225e+09	4.23714e+09	4.52262e+09	4.66789e+09	4.6865e+09	4.85354e+09	5.00813e+09	5.1244e+09
Cuba	Other Activities (ISIC J-P)	1.09598e+10	1.15711e+10	1.19087e+10	1.26361e+10	1.41938e+10	17619400000	1.90151e+10	2.15962e+10	2.3078e+10	2.3729e+10	2.38744e+10	2.47213e+10	2.54932e+10	2.6097e+10
Cuba	Total Value Added	2.71068e+10	2.82957e+10	2.8856e+10	2.97755e+10	3.12002e+10	34905600000	3.8853e+10	4.16296e+10	4.40381e+10	4.50973e+10	4.56465e+10	4.714e+10	4.86003e+10	4.98033e+10
Curaçao	Final consumption expenditure	1.71443e+09	1.5818e+09	1.66718e+09	1.71427e+09	1.81544e+09	1.89879e+09	2.01778e+09	2.21323e+09	2.36539e+09	2.35816e+09	2.57482e+09	2.54877e+09	2.63599e+09	2.69615e+09
Curaçao	Household consumption expenditure (including Non-profit institutions serving households)	1.20171e+09	1.24701e+09	1.32742e+09	1.34086e+09	1.43033e+09	1.52357e+09	1.63218e+09	1.79831e+09	1.93727e+09	1.91058e+09	2.12365e+09	2.08525e+09	2.15585e+09	2.21166e+09
Curaçao	General government final consumption expenditure	5.12716e+08	3.34793e+08	3.39761e+08	3.73411e+08	3.85107e+08	3.75224e+08	3.85593e+08	4.14923e+08	4.2812e+08	4.47577e+08	4.51168e+08	4.63524e+08	4.80142e+08	4.84488e+08
Curaçao	Gross capital formation	6.43313e+08	8.21018e+08	7.82492e+08	7.6625e+08	7.55113e+08	8.19086e+08	8.29202e+08	8.8269e+08	1.03634e+09	9.83641e+08	1.1257e+09	1.0985e+09	1.12988e+09	1.16562e+09
Curaçao	Gross fixed capital formation (including Acquisitions less disposals of valuables)	6.85468e+08	7.05623e+08	7.39171e+08	7.2327e+08	7.30154e+08	8.06865e+08	8.90727e+08	9.89632e+08	1.06197e+09	9.89617e+08	1.07344e+09	1.09192e+09	1.11139e+09	1.13845e+09
Curaçao	Changes in inventories	-4.2155e+07	1.15395e+08	4.33216e+07	4.29798e+07	2.49593e+07	1.22209e+07	-6.15249e+07	-1.06942e+08	-2.56227e+07	-5.97559e+06	5.22607e+07	6.58251e+06	1.84938e+07	2.71688e+07
Curaçao	Exports of goods and services	1.32736e+09	1.40868e+09	1.35764e+09	1.29064e+09	1.30815e+09	1.39497e+09	1.53235e+09	1.51514e+09	1.84895e+09	1.64426e+09	1.54701e+09	1.76374e+09	1.74597e+09	1.75566e+09
Curaçao	Imports of goods and services	1.53786e+09	1.63399e+09	1.62109e+09	1.54996e+09	1.6264e+09	1.76821e+09	1.96201e+09	2.12122e+09	2.58905e+09	2.27652e+09	2.4621e+09	2.56153e+09	2.57118e+09	2.63853e+09
Curaçao	Gross Domestic Product (GDP)	2.14725e+09	2.17751e+09	2.18622e+09	2.2212e+09	2.25229e+09	2.34464e+09	2.41732e+09	2.48984e+09	2.66164e+09	2.70955e+09	2.78542e+09	2.84948e+09	2.94066e+09	2.97889e+09	3.82286e+07
Curaçao	Agriculture, hunting, forestry, fishing (ISIC A-B)	1.17548e+07	1.83314e+07	1.36222e+07	1.30732e+07	1.23174e+07	1.37989e+07	1.37377e+07	1.44253e+07	1.70028e+07	1.29258e+07	1.26013e+07	1.48957e+07	1.42348e+07	1.44896e+07
Curaçao	Mining, Manufacturing, Utilities (ISIC C-E)	2.35749e+08	2.76313e+08	2.51651e+08	2.46163e+08	2.46153e+08	2.38935e+08	2.80208e+08	2.70787e+08	3.03066e+08	3.31895e+08	2.76293e+08	3.18713e+08	3.26936e+08	3.19953e+08
Curaçao	Manufacturing (ISIC D)	1.6506e+08	1.7465e+08	1.63822e+08	1.5462e+08	1.65509e+08	1.4222e+08	1.88042e+08	1.80351e+08	2.15711e+08	2.13075e+08	1.75486e+08	2.11512e+08	2.11599e+08	2.07714e+08
Curaçao	Construction (ISIC F)	8.18267e+07	1.03568e+08	1.09344e+08	9.832e+07	9.47023e+07	1.257e+08	1.1644e+08	1.26323e+08	1.56394e+08	1.4103e+08	1.48388e+08	1.55849e+08	1.56851e+08	1.60171e+08
Curaçao	Wholesale, retail trade, restaurants and hotels (ISIC G-H)	3.14053e+08	3.28407e+08	2.99743e+08	2.91524e+08	2.96425e+08	3.26423e+08	3.32294e+08	3.17906e+08	3.82049e+08	3.8873e+08	3.94868e+08	4.07256e+08	4.19684e+08	4.24396e+08
Curaçao	Transport, storage and communication (ISIC I)	1.61575e+08	2.00648e+08	2.20025e+08	2.22069e+08	1.75382e+08	1.75347e+08	2.02493e+08	1.8457e+08	2.17188e+08	2.40188e+08	2.9503e+08	2.62308e+08	2.8095e+08	2.91449e+08
Curaçao	Other Activities (ISIC J-P)	1.17154e+09	1.09783e+09	1.12679e+09	1.19144e+09	1.28264e+09	1.32368e+09	1.29598e+09	1.37744e+09	1.37091e+09	1.37485e+09	1.44908e+09	1.46531e+09	1.51139e+09	1.53754e+09
Curaçao	Total Value Added	1.9765e+09	2.0251e+09	2.02117e+09	2.06259e+09	2.10762e+09	2.20388e+09	2.24116e+09	2.29145e+09	2.4466e+09	2.48962e+09	2.57626e+09	2.62433e+09	2.71005e+09	2.748e+09
Cyprus	Final consumption expenditure	1.1782e+10	1.21839e+10	1.25397e+10	1.31944e+10	1.40022e+10	1.4459e+10	1.52263e+10	1.65506e+10	1.77879e+10	1.70909e+10	1.72102e+10	1.74848e+10	1.72866e+10	1.62856e+10
Cyprus	Household consumption expenditure (including Non-profit institutions serving households)	9.29976e+09	9.66279e+09	9.92886e+09	1.02386e+10	1.1013e+10	1.13864e+10	1.19369e+10	1.31563e+10	1.42028e+10	1.32706e+10	1.34451e+10	1.36937e+10	1.35991e+10	1.27774e+10
Cyprus	General government final consumption expenditure	2.48254e+09	2.52215e+09	2.61166e+09	2.95344e+09	2.98894e+09	3.0726e+09	3.28862e+09	3.3962e+09	3.58809e+09	3.81732e+09	3.76342e+09	3.78994e+09	3.68723e+09	3.50746e+09
Cyprus	Gross capital formation	3.29357e+09	3.20409e+09	3.76325e+09	3.62101e+09	3.98363e+09	4.16894e+09	4.70663e+09	4.93279e+09	5.57153e+09	4.5163e+09	4.91798e+09	4.18842e+09	3.53587e+09	2.47496e+09
Cyprus	Gross fixed capital formation (including Acquisitions less disposals of valuables)	3.11908e+09	3.13224e+09	3.54343e+09	3.58882e+09	3.73881e+09	3.99275e+09	4.8342e+09	5.21192e+09	5.67999e+09	4.89018e+09	4.63858e+09	4.20074e+09	3.33298e+09	2.76254e+09
Cyprus	Changes in inventories	1.72886e+08	7.47327e+07	2.17066e+08	3.76857e+07	2.41338e+08	1.76186e+08	-1.12738e+08	-2.56987e+08	-9.28304e+07	-3.4822e+08	2.76149e+08	-3.72599e+06	2.00458e+08	-2.69762e+08
Cyprus	Exports of goods and services	1.03013e+10	1.05255e+10	1.00945e+10	9.95367e+09	1.02017e+10	1.04109e+10	1.05428e+10	1.10996e+10	1.09082e+10	1.01145e+10	1.03806e+10	1.08179e+10	1.06378e+10	1.01074e+10
Cyprus	Imports of goods and services	9.82483e+09	9.8061e+09	9.77103e+09	9.67589e+09	1.0348e+10	1.05104e+10	1.11097e+10	1.22721e+10	1.32223e+10	1.11002e+10	1.1602e+10	1.15302e+10	1.09999e+10	9.50319e+09
Cyprus	Gross Domestic Product (GDP)	1.55522e+10	1.61082e+10	1.66272e+10	1.70907e+10	1.78391e+10	1.85283e+10	1.93653e+10	2.03128e+10	2.10483e+10	2.06184e+10	2.09052e+10	2.09598e+10	2.04599e+10	1.9364e+10	-1.09587e+09
Cyprus	Agriculture, hunting, forestry, fishing (ISIC A-B)	4.73773e+08	4.71415e+08	4.99804e+08	4.44615e+08	4.50807e+08	4.47402e+08	3.98973e+08	3.84002e+08	3.59271e+08	3.58375e+08	3.73144e+08	3.97043e+08	3.94962e+08	3.91103e+08
Cyprus	Mining, Manufacturing, Utilities (ISIC C-E)	1.56675e+09	1.59522e+09	1.65241e+09	1.70581e+09	1.72566e+09	1.70072e+09	1.67574e+09	1.73535e+09	1.75832e+09	1.70251e+09	1.7115e+09	1.62249e+09	1.491e+09	1.35435e+09
Cyprus	Manufacturing (ISIC D)	1.28794e+09	1.26684e+09	1.28568e+09	1.31523e+09	1.30713e+09	1.28611e+09	1.23931e+09	1.25894e+09	1.30001e+09	1.22411e+09	1.20422e+09	1.13547e+09	1.03588e+09	9.3448e+08
Cyprus	Construction (ISIC F)	1.25535e+09	1.29936e+09	1.39529e+09	1.52528e+09	1.59931e+09	1.68155e+09	1.82587e+09	1.97776e+09	2.0136e+09	1.63833e+09	1.50476e+09	1.35735e+09	1.09534e+09	7.6064e+08
Cyprus	Wholesale, retail trade, restaurants and hotels (ISIC G-H)	2.75322e+09	3.00462e+09	3.00389e+09	3.11948e+09	3.38805e+09	3.5845e+09	3.80505e+09	4.05383e+09	4.11259e+09	3.97192e+09	4.05442e+09	4.12607e+09	4.02389e+09	3.86743e+09
Cyprus	Transport, storage and communication (ISIC I)	1.59302e+09	1.55729e+09	1.60145e+09	1.60614e+09	1.77006e+09	1.82244e+09	1.89922e+09	1.95688e+09	2.10157e+09	2.00217e+09	2.04913e+09	2.01553e+09	1.97904e+09	1.95696e+09
Cyprus	Other Activities (ISIC J-P)	6.38593e+09	6.6141e+09	6.85275e+09	7.05493e+09	7.25007e+09	7.54354e+09	7.92691e+09	8.28684e+09	8.7281e+09	9.00337e+09	9.26795e+09	9.50344e+09	9.5949e+09	9.29073e+09
Cyprus	Total Value Added	1.40518e+10	1.45552e+10	1.50305e+10	1.5472e+10	1.61857e+10	1.67801e+10	1.75259e+10	1.83809e+10	1.90656e+10	1.86859e+10	1.8972e+10	1.90421e+10	1.8612e+10	1.76539e+10
Czech Republic	Final consumption expenditure	7.88463e+10	8.11947e+10	8.48834e+10	8.92552e+10	9.0916e+10	9.31228e+10	9.56778e+10	9.85663e+10	1.00916e+11	1.01328e+11	1.02164e+11	1.01448e+11	9.98782e+10	1.00815e+11
Czech Republic	Household consumption expenditure (including Non-profit institutions serving households)	5.52108e+10	5.67654e+10	5.84246e+10	6.12044e+10	6.333e+10	6.53853e+10	6.78586e+10	7.06683e+10	7.27183e+10	7.2242e+10	7.29695e+10	7.31356e+10	7.18424e+10	7.21255e+10
Czech Republic	General government final consumption expenditure	2.363e+10	2.44204e+10	2.6416e+10	2.79975e+10	2.75676e+10	2.77375e+10	2.78439e+10	2.79512e+10	2.82659e+10	2.91254e+10	2.92394e+10	2.83822e+10	2.80982e+10	2.87381e+10
Czech Republic	Gross capital formation	3.24483e+10	3.45415e+10	3.51569e+10	3.51252e+10	3.7708e+10	3.96666e+10	4.36761e+10	4.99633e+10	5.05541e+10	4.1415e+10	4.32476e+10	4.4053e+10	4.24068e+10	4.02389e+10
Czech Republic	Gross fixed capital formation (including Acquisitions less disposals of valuables)	3.17859e+10	3.356e+10	3.42867e+10	3.48982e+10	3.62719e+10	3.85981e+10	4.08654e+10	4.63987e+10	4.75767e+10	4.27763e+10	4.33396e+10	4.38047e+10	4.25198e+10	4.06471e+10
Czech Republic	Changes in inventories	7.19772e+08	9.6766e+08	8.91033e+08	4.21644e+08	1.32234e+09	1.06852e+09	2.36831e+09	2.96401e+09	2.54002e+09	-6.907e+08	2.4823e+08	5.0233e+08	2.26849e+08	-4.23699e+06
Czech Republic	Exports of goods and services	4.59752e+10	5.03206e+10	5.07841e+10	5.52688e+10	7.16959e+10	8.47419e+10	9.68567e+10	1.07537e+11	1.12087e+11	1.01067e+11	1.16072e+11	1.26901e+11	1.32085e+11	1.32461e+11
Czech Republic	Imports of goods and services	4.5272e+10	5.03528e+10	5.27791e+10	5.73221e+10	7.22783e+10	8.15412e+10	9.08946e+10	1.02571e+11	1.05841e+11	9.4174e+10	1.08205e+11	1.15457e+11	1.1828e+11	1.18623e+11
Czech Republic	Gross Domestic Product (GDP)	1.12177e+11	1.156e+11	1.17504e+11	1.21737e+11	1.2776e+11	1.3599e+11	1.45342e+11	1.53378e+11	1.57536e+11	1.49908e+11	1.53349e+11	1.5636e+11	1.55096e+11	1.54008e+11	-1.08824e+09
Czech Republic	Agriculture, hunting, forestry, fishing (ISIC A-B)	2.46073e+09	2.40462e+09	2.38869e+09	2.45983e+09	2.73136e+09	3.01326e+09	2.75445e+09	2.04869e+09	2.23228e+09	2.6956e+09	2.25709e+09	2.2978e+09	2.35657e+09	2.1452e+09
Czech Republic	Mining, Manufacturing, Utilities (ISIC C-E)	2.98408e+10	3.10263e+10	3.18556e+10	3.21135e+10	3.49087e+10	3.82033e+10	4.4092e+10	4.62505e+10	5.00389e+10	4.42906e+10	4.69316e+10	5.00289e+10	4.93229e+10	4.79236e+10
Czech Republic	Manufacturing (ISIC D)	2.27544e+10	2.36242e+10	2.45753e+10	2.49806e+10	2.717e+10	3.13896e+10	3.78237e+10	4.03904e+10	4.37811e+10	3.85013e+10	4.2799e+10	4.71294e+10	4.64665e+10	4.5362e+10
Czech Republic	Construction (ISIC F)	7.12378e+09	6.94388e+09	7.15816e+09	7.38452e+09	8.00205e+09	8.22413e+09	8.20495e+09	8.59692e+09	8.59075e+09	8.28926e+09	8.61764e+09	8.04371e+09	7.74011e+09	7.67583e+09
Czech Republic	Wholesale, retail trade, restaurants and hotels (ISIC G-H)	1.29449e+10	1.35724e+10	1.3652e+10	1.46191e+10	1.56755e+10	1.65523e+10	1.75435e+10	1.92654e+10	1.91461e+10	1.75706e+10	1.86721e+10	1.94056e+10	1.93055e+10	1.93196e+10
Czech Republic	Transport, storage and communication (ISIC I)	1.21459e+10	1.26442e+10	1.3031e+10	1.37326e+10	1.33651e+10	1.39304e+10	1.52628e+10	1.61434e+10	1.60715e+10	1.5099e+10	1.51132e+10	1.47223e+10	1.42746e+10	1.40069e+10
Czech Republic	Other Activities (ISIC J-P)	4.02221e+10	4.10897e+10	4.11343e+10	4.15832e+10	4.23725e+10	4.31894e+10	4.35709e+10	4.56839e+10	4.68296e+10	4.63192e+10	4.65453e+10	4.68277e+10	4.71701e+10	4.82844e+10
Czech Republic	Total Value Added	1.05577e+11	1.08414e+11	1.09878e+11	1.12532e+11	1.17403e+11	1.23113e+11	1.30683e+11	1.37117e+11	1.41706e+11	1.33807e+11	1.37307e+11	1.40018e+11	1.38958e+11	1.38426e+11
Czechoslovakia (Former)	Final consumption expenditure
Czechoslovakia (Former)	Household consumption expenditure (including Non-profit institutions serving households)
Czechoslovakia (Former)	General government final consumption expenditure
Czechoslovakia (Former)	Gross capital formation
Czechoslovakia (Former)	Gross fixed capital formation (including Acquisitions less disposals of valuables)
Czechoslovakia (Former)	Changes in inventories
Czechoslovakia (Former)	Exports of goods and services
Czechoslovakia (Former)	Gross Domestic Product (GDP)															0
Czechoslovakia (Former)	Agriculture, hunting, forestry, fishing (ISIC A-B)
Czechoslovakia (Former)	Mining, Manufacturing, Utilities (ISIC C-E)
Czechoslovakia (Former)	Manufacturing (ISIC D)
Czechoslovakia (Former)	Construction (ISIC F)
Czechoslovakia (Former)	Wholesale, retail trade, restaurants and hotels (ISIC G-H)
Czechoslovakia (Former)	Transport, storage and communication (ISIC I)
Czechoslovakia (Former)	Other Activities (ISIC J-P)
Czechoslovakia (Former)	Total Value Added
D.P.R. of Korea	Final consumption expenditure	1.2178e+10	1.27168e+10	1.2715e+10	1.29608e+10	1.31633e+10	1.36992e+10	1.3609e+10	1.34011e+10	1.38311e+10	1.37114e+10	1.36378e+10	1.37505e+10	1.39307e+10	1.40357e+10
D.P.R. of Korea	Exports of goods and services	4.84985e+08	6.28198e+08	7.15787e+08	7.12799e+08	7.7165e+08	7.75844e+08	7.39092e+08	7.57385e+08	7.72029e+08	7.61623e+08	7.63175e+08	7.66933e+08	7.76787e+08	7.83639e+08
D.P.R. of Korea	Imports of goods and services	1.15492e+09	1.4047e+09	1.34699e+09	1.3701e+09	1.37605e+09	1.44384e+09	1.45048e+09	1.41391e+09	1.46374e+09	1.45305e+09	1.44247e+09	1.45559e+09	1.47481e+09	1.48542e+09
D.P.R. of Korea	Gross Domestic Product (GDP)	1.15081e+10	1.19403e+10	1.20838e+10	1.23035e+10	1.25589e+10	1.30312e+10	1.28976e+10	1.27445e+10	1.31394e+10	1.302e+10	1.29585e+10	1.30618e+10	1.32327e+10	1.33339e+10	1.01172e+08
D.P.R. of Korea	Agriculture, hunting, forestry, fishing (ISIC A-B)	2.6119e+09	2.8033e+09	2.92226e+09	2.97252e+09	3.09527e+09	3.25927e+09	3.17345e+09	2.88432e+09	3.11645e+09	3.08505e+09	3.01919e+09	3.17946e+09	3.30442e+09	3.22734e+09
D.P.R. of Korea	Mining, Manufacturing, Utilities (ISIC C-E)	3.9193e+09	4.06749e+09	3.96676e+09	4.08846e+09	4.15031e+09	4.32728e+09	4.3778e+09	4.44271e+09	4.57558e+09	4.48554e+09	4.46958e+09	4.37801e+09	4.43633e+09	4.51284e+09
D.P.R. of Korea	Manufacturing (ISIC D)	2.25481e+09	2.32604e+09	2.29184e+09	2.35454e+09	2.36191e+09	2.47613e+09	2.48714e+09	2.5049e+09	2.56943e+09	2.49125e+09	2.48282e+09	2.40864e+09	2.44605e+09	2.49277e+09
D.P.R. of Korea	Construction (ISIC F)	9.70328e+08	1.03903e+09	1.14782e+09	1.17211e+09	1.17653e+09	1.24787e+09	1.10446e+09	1.08786e+09	1.09951e+09	1.10831e+09	1.11205e+09	1.15572e+09	1.13676e+09	1.1565e+09
D.P.R. of Korea	Other Activities (ISIC J-P)	4.09173e+09	4.0804e+09	4.06792e+09	4.09204e+09	4.14383e+09	4.19683e+09	4.24182e+09	4.313e+09	4.34266e+09	4.34656e+09	4.35736e+09	4.36937e+09	4.37348e+09	4.4503e+09
D.P.R. of Korea	Total Value Added	1.15932e+10	1.19902e+10	1.21048e+10	1.23251e+10	1.25659e+10	1.30312e+10	1.28975e+10	1.27279e+10	1.31342e+10	1.30255e+10	1.29582e+10	1.30826e+10	1.3251e+10	1.3347e+10
D.R. of the Congo	Final consumption expenditure	9.00829e+09	8.72532e+09	8.08195e+09	9.81309e+09	1.0479e+10	1.13239e+10	1.15423e+10	1.23933e+10	1.26809e+10	1.27031e+10	1.52641e+10	1.56457e+10	1.61681e+10	1.77916e+10
D.R. of the Congo	Household consumption expenditure (including Non-profit institutions serving households)	8.54322e+09	8.42062e+09	7.58438e+09	9.37418e+09	9.80591e+09	1.04928e+10	1.05044e+10	1.12748e+10	1.13389e+10	1.15923e+10	1.34471e+10	1.37803e+10	1.42547e+10	1.56062e+10
D.R. of the Congo	General government final consumption expenditure	4.65069e+08	3.047e+08	4.97565e+08	4.38904e+08	6.73126e+08	8.31174e+08	1.03797e+09	1.11857e+09	1.34203e+09	1.11076e+09	1.81702e+09	1.86534e+09	1.91345e+09	2.18545e+09
D.R. of the Congo	Gross capital formation	7.86018e+08	8.41725e+08	1.24201e+09	1.28844e+09	1.2091e+09	1.40935e+09	1.67205e+09	1.87695e+09	1.9968e+09	3.31393e+09	4.00457e+09	4.48737e+09	4.92079e+09	5.31441e+09
D.R. of the Congo	Gross fixed capital formation (including Acquisitions less disposals of valuables)	7.81164e+08	8.37926e+08	1.23779e+09	1.27831e+09	1.19665e+09	1.3969e+09	1.66404e+09	1.86872e+09	1.98836e+09	3.30507e+09	3.99234e+09	4.46838e+09	4.91446e+09	5.26452e+09
D.R. of the Congo	Changes in inventories	4.85326e+06	3.79821e+06	4.22023e+06	1.01285e+07	1.24497e+07	1.24497e+07	8.01843e+06	8.22945e+06	8.44046e+06	8.86248e+06	1.22387e+07	1.8991e+07	6.33034e+06	4.98831e+07
D.R. of the Congo	Exports of goods and services	1.4028e+09	1.12933e+09	2.06074e+09	2.36459e+09	2.42937e+09	2.74526e+09	2.48804e+09	3.15314e+09	3.30085e+09	2.36734e+09	2.39287e+09	2.7767e+09	2.43043e+09	2.85034e+09
D.R. of the Congo	Imports of goods and services	1.27177e+09	9.79515e+08	1.38128e+09	2.90521e+09	2.84464e+09	3.51397e+09	3.10123e+09	4.03348e+09	3.75474e+09	3.75474e+09	5.99209e+09	6.16301e+09	5.58589e+09	6.50189e+09
D.R. of the Congo	Gross Domestic Product (GDP)	9.92534e+09	9.71686e+09	1.00032e+10	1.05611e+10	1.12729e+10	1.19646e+10	1.26012e+10	1.33897e+10	1.42236e+10	1.46296e+10	1.56695e+10	1.67465e+10	1.79334e+10	1.94546e+10	1.52118e+09
D.R. of the Congo	Agriculture, hunting, forestry, fishing (ISIC A-B)	2.64672e+09	2.60684e+09	2.51209e+09	2.52876e+09	2.56949e+09	2.58194e+09	2.72732e+09	2.80286e+09	2.88052e+09	2.9607e+09	3.06768e+09	3.1772e+09	3.28692e+09	3.42647e+09
D.R. of the Congo	Mining, Manufacturing, Utilities (ISIC C-E)	2.97864e+09	2.70285e+09	2.83262e+09	2.85034e+09	2.95606e+09	3.34812e+09	3.44877e+09	3.59901e+09	3.76191e+09	3.8001e+09	5.03321e+09	5.80931e+09	6.29084e+09	6.92179e+09
D.R. of the Congo	Manufacturing (ISIC D)	2.18967e+09	1.88011e+09	1.96114e+09	1.87357e+09	1.95439e+09	2.30973e+09	2.49964e+09	2.62709e+09	2.69799e+09	2.74948e+09	1.77239e+09	1.80402e+09	1.89822e+09	2.08908e+09
D.R. of the Congo	Construction (ISIC F)	2.04048e+08	2.23039e+08	2.41819e+08	2.98581e+08	3.73912e+08	4.55574e+08	4.53886e+08	4.78363e+08	4.9651e+08	5.25418e+08	5.32403e+08	6.27738e+08	7.22777e+08	8.24865e+08
D.R. of the Congo	Wholesale, retail trade, restaurants and hotels (ISIC G-H)	1.33423e+09	1.35765e+09	1.35955e+09	1.38402e+09	1.56296e+09	1.62816e+09	1.78241e+09	1.99638e+09	2.20549e+09	2.4146e+09	2.34934e+09	2.36843e+09	2.63465e+09	2.85064e+09
D.R. of the Congo	Transport, storage and communication (ISIC I)	8.90257e+08	9.86689e+08	1.16668e+09	1.47835e+09	1.6001e+09	1.65412e+09	1.7706e+09	2.05926e+09	2.25318e+09	2.19747e+09	2.08207e+09	2.09425e+09	2.21693e+09	2.42828e+09
D.R. of the Congo	Other Activities (ISIC J-P)	1.71932e+09	1.54144e+09	1.58153e+09	1.68788e+09	1.84487e+09	1.91092e+09	1.96642e+09	2.10927e+09	2.29939e+09	2.41566e+09	2.27664e+09	2.31452e+09	2.37388e+09	2.51237e+09
D.R. of the Congo	Total Value Added	9.7732e+09	9.41849e+09	9.69429e+09	1.02279e+10	1.09074e+10	1.15788e+10	1.21494e+10	1.30451e+10	1.3897e+10	1.4314e+10	1.53414e+10	1.63915e+10	1.7526e+10	1.89644e+10
Denmark	Final consumption expenditure	1.73481e+11	1.7489e+11	1.77841e+11	1.79527e+11	1.85901e+11	1.91176e+11	1.96541e+11	1.9963e+11	2.02436e+11	1.99965e+11	2.01864e+11	2.01089e+11	2.01389e+11	2.01604e+11
Denmark	Household consumption expenditure (including Non-profit institutions serving households)	1.1304e+11	1.13298e+11	1.14936e+11	1.1647e+11	1.21882e+11	1.26385e+11	1.30105e+11	1.32397e+11	1.33017e+11	1.28432e+11	1.29415e+11	1.29786e+11	1.30097e+11	1.30272e+11
Denmark	General government final consumption expenditure	6.04418e+10	6.15924e+10	6.29047e+10	6.30573e+10	6.40188e+10	6.47909e+10	6.6436e+10	6.72334e+10	6.94183e+10	7.15332e+10	7.24488e+10	7.1303e+10	7.12921e+10	7.13318e+10
Denmark	Gross capital formation	5.39829e+10	5.31875e+10	5.33561e+10	5.21486e+10	5.60144e+10	5.86454e+10	6.67755e+10	6.82877e+10	6.47721e+10	5.02685e+10	5.12919e+10	5.40627e+10	5.26568e+10	5.31968e+10
Denmark	Gross fixed capital formation (including Acquisitions less disposals of valuables)	5.20643e+10	5.18211e+10	5.14392e+10	5.14206e+10	5.35682e+10	5.61246e+10	6.46e+10	6.50251e+10	6.28763e+10	5.39085e+10	5.1762e+10	5.28489e+10	5.31053e+10	5.34122e+10
Denmark	Changes in inventories	1.97335e+09	1.49174e+09	1.96822e+09	9.34192e+08	2.44094e+09	2.5208e+09	2.27018e+09	3.21796e+09	2.01687e+09	-2.8495e+09	-1.05666e+08	1.36505e+09	-7.89997e+07	1.25576e+08
Denmark	Exports of goods and services	1.05955e+11	1.09507e+11	1.13483e+11	1.12973e+11	1.15952e+11	1.25389e+11	1.37671e+11	1.42581e+11	1.47136e+11	1.33171e+11	1.3573e+11	1.45645e+11	1.45486e+11	1.473e+11
Denmark	Imports of goods and services	8.63036e+10	8.83708e+10	9.40054e+10	9.30425e+10	9.96826e+10	1.10651e+11	1.26384e+11	1.3359e+11	1.39279e+11	1.21967e+11	1.23087e+11	1.31698e+11	1.32644e+11	1.35611e+11
Denmark	Gross Domestic Product (GDP)	2.47447e+11	2.49484e+11	2.50647e+11	2.51625e+11	2.58265e+11	2.64559e+11	2.74604e+11	2.76868e+11	2.7488e+11	2.60894e+11	2.65134e+11	2.68523e+11	2.66408e+11	2.66033e+11	-3.74993e+08
Denmark	Agriculture, hunting, forestry, fishing (ISIC A-B)	3.16621e+09	3.30342e+09	3.14445e+09	3.1487e+09	3.22915e+09	3.02989e+09	3.1624e+09	3.36532e+09	2.54359e+09	2.45727e+09	3.20077e+09	3.10915e+09	3.16842e+09	2.91695e+09
Denmark	Mining, Manufacturing, Utilities (ISIC C-E)	4.76456e+10	4.78901e+10	4.68788e+10	4.57972e+10	4.70751e+10	4.67823e+10	4.80494e+10	4.69327e+10	4.53988e+10	4.0388e+10	4.14122e+10	4.27293e+10	4.23827e+10	4.1667e+10
Denmark	Manufacturing (ISIC D)	3.31724e+10	3.37033e+10	3.2885e+10	3.19218e+10	3.24699e+10	3.24244e+10	3.41242e+10	3.47255e+10	3.40536e+10	2.99488e+10	3.06665e+10	3.39558e+10	3.45175e+10	3.55619e+10
Denmark	Construction (ISIC F)	1.22698e+10	1.13703e+10	1.14616e+10	1.18837e+10	1.2018e+10	1.21304e+10	1.31165e+10	1.2705e+10	1.33723e+10	1.21307e+10	1.06369e+10	1.0825e+10	1.05398e+10	1.03178e+10
Denmark	Wholesale, retail trade, restaurants and hotels (ISIC G-H)	3.11902e+10	3.10153e+10	3.09526e+10	3.1321e+10	3.19454e+10	3.3621e+10	3.61618e+10	3.75252e+10	3.59847e+10	3.3963e+10	3.5493e+10	3.6296e+10	3.62348e+10	3.61006e+10
Denmark	Transport, storage and communication (ISIC I)	1.92463e+10	2.02035e+10	2.06623e+10	2.14421e+10	2.14643e+10	2.13899e+10	2.23867e+10	2.31542e+10	2.30197e+10	2.12339e+10	2.22634e+10	2.28919e+10	2.27453e+10	2.26914e+10
Denmark	Other Activities (ISIC J-P)	1.00947e+11	1.02347e+11	1.03347e+11	1.0343e+11	1.05345e+11	1.07863e+11	1.10259e+11	1.10604e+11	1.13644e+11	1.13332e+11	1.14117e+11	1.14357e+11	1.13413e+11	1.14336e+11
Denmark	Total Value Added	2.14465e+11	2.1613e+11	2.16447e+11	2.17022e+11	2.21077e+11	2.24816e+11	2.33135e+11	2.34286e+11	2.33963e+11	223504571521	2.27123e+11	2.30208e+11	2.28484e+11	2.2803e+11
Djibouti	Final consumption expenditure	7.37085e+08	7.11592e+08	6.9491e+08	6.785e+08	7.13429e+08	7.31439e+08	7.9398e+08	8.5935e+08	9.81834e+08	8.72443e+08	1.00084e+09	1.10101e+09	1.17318e+09	1.26469e+09
Djibouti	Household consumption expenditure (including Non-profit institutions serving households)	5.72086e+08	5.61523e+08	5.2727e+08	4.9247e+08	5.21526e+08	5.53339e+08	5.68279e+08	6.58068e+08	7.73229e+08	6.83535e+08	8.10672e+08	9.09415e+08	9.77678e+08	1.0632e+09
Djibouti	General government final consumption expenditure	1.68525e+08	1.55719e+08	1.68021e+08	1.80959e+08	1.87473e+08	1.78099e+08	2.17816e+08	2.03222e+08	2.16025e+08	1.94638e+08	2.03203e+08	2.10225e+08	2.17465e+08	2.27415e+08
Djibouti	Gross capital formation	3.90851e+07	3.53058e+07	4.618e+07	8.94506e+07	1.03584e+08	1.17257e+08	1.99688e+08	2.52206e+08	2.93568e+08	2.48946e+08	1.83473e+08	2.191e+08	2.68453e+08	2.94657e+08
Djibouti	Gross fixed capital formation (including Acquisitions less disposals of valuables)	3.90851e+07	3.53058e+07	4.618e+07	8.94506e+07	1.03584e+08	1.17257e+08	1.99688e+08	2.52206e+08	2.93568e+08	2.48946e+08	1.83473e+08	2.191e+08	2.68453e+08	2.94657e+08
Djibouti	Exports of goods and services	2.34442e+08	2.54304e+08	2.66002e+08	2.93667e+08	2.82214e+08	3.14386e+08	3.54313e+08	3.48644e+08	3.82114e+08	4.85285e+08	4.8674e+08	5.41145e+08	5.66101e+08	5.78443e+08
Djibouti	Imports of goods and services	3.53925e+08	3.28061e+08	3.21827e+08	3.81044e+08	4.04668e+08	4.54443e+08	5.90775e+08	6.91798e+08	8.71666e+08	7.40044e+08	7.19323e+08	9.15754e+08	1.05561e+09	1.16231e+09
Djibouti	Gross Domestic Product (GDP)	6.17273e+08	6.29619e+08	6.45989e+08	6.6666e+08	6.8666e+08	7.08633e+08	7.9863e+08	8.38561e+08	8.80489e+08	9.28916e+08	9.70717e+08	1.0144e+09	1.06309e+09	1.11625e+09	5.31545e+07
Djibouti	Agriculture, hunting, forestry, fishing (ISIC A-B)	1.89417e+07	1.95099e+07	2.00952e+07	2.06981e+07	2.16295e+07	2.26028e+07	2.4072e+07	2.55164e+07	2.73025e+07	2.92137e+07	3.12586e+07	3.18364e+07	3.3677e+07	3.54462e+07
Djibouti	Mining, Manufacturing, Utilities (ISIC C-E)	4.48929e+07	4.65898e+07	4.87021e+07	5.05446e+07	5.23429e+07	5.4248e+07	5.81811e+07	6.15038e+07	6.57986e+07	7.03936e+07	7.58155e+07	7.87842e+07	8.20524e+07	8.66769e+07
Djibouti	Manufacturing (ISIC D)	1.39562e+07	1.43888e+07	1.48349e+07	1.52947e+07	1.59065e+07	1.65428e+07	1.72045e+07	1.80647e+07	1.93292e+07	2.06823e+07	2.21301e+07	2.33872e+07	2.41385e+07	2.55095e+07
Djibouti	Construction (ISIC F)	3.27188e+07	3.5026e+07	3.64271e+07	3.78841e+07	4.35668e+07	4.79234e+07	5.41535e+07	6.22765e+07	6.97497e+07	7.67246e+07	8.43971e+07	9.24934e+07	9.23895e+07	9.86128e+07
Djibouti	Wholesale, retail trade, restaurants and hotels (ISIC G-H)	1.04991e+08	1.07989e+08	1.13064e+08	1.18265e+08	1.23587e+08	1.30632e+08	1.39515e+08	1.49281e+08	1.60029e+08	1.70591e+08	1.83044e+08	1.9141e+08	1.98764e+08	2.09938e+08
Djibouti	Transport, storage and communication (ISIC I)	1.47775e+08	1.53876e+08	1.58271e+08	1.62861e+08	1.62046e+08	1.68528e+08	1.76112e+08	1.84918e+08	1.96013e+08	2.09734e+08	2.26512e+08	2.3917e+08	2.46248e+08	2.60738e+08
Djibouti	Other Activities (ISIC J-P)	2.02392e+08	2.06434e+08	2.03007e+08	2.02136e+08	2.10115e+08	2.06397e+08	2.07471e+08	2.11072e+08	2.12854e+08	2.18401e+08	2.25237e+08	2.32003e+08	2.46585e+08	2.57738e+08
Djibouti	Total Value Added	5.5372e+08	5.71372e+08	5.80418e+08	5.92358e+08	6.1449e+08	6.30331e+08	6.58968e+08	6.93721e+08	7.30049e+08	7.72643e+08	8.22886e+08	8.62093e+08	8.96304e+08	9.45339e+08
Dominica	Final consumption expenditure	3.25335e+08	3.28555e+08	3.42554e+08	3.35215e+08	3.27518e+08	3.49778e+08	3.6412e+08	4.14065e+08	4.72397e+08	4.4642e+08	4.20124e+08	4.12236e+08	3.86848e+08	4.45996e+08
Dominica	Household consumption expenditure (including Non-profit institutions serving households)	2.64673e+08	2.68452e+08	2.8277e+08	2.8277e+08	2.72032e+08	2.93508e+08	3.09257e+08	3.53834e+08	4.1592e+08	3.78552e+08	3.51219e+08	3.41081e+08	3.11669e+08	3.69821e+08
Dominica	General government final consumption expenditure	5.9866e+07	5.94094e+07	5.93368e+07	5.25873e+07	5.52186e+07	5.62704e+07	5.52186e+07	6.08404e+07	5.83428e+07	6.82454e+07	6.87784e+07	7.06925e+07	7.39408e+07	7.57514e+07
Dominica	Gross capital formation	6.09767e+07	4.9936e+07	2.37945e+07	3.23246e+07	7.01899e+07	7.31852e+07	7.73682e+07	8.31217e+07	9.65241e+07	8.77068e+07	9.64635e+07	9.74827e+07	9.29837e+07	5.32722e+07
Dominica	Gross fixed capital formation (including Acquisitions less disposals of valuables)	6.09767e+07	4.9936e+07	2.37945e+07	3.23246e+07	7.01899e+07	7.31852e+07	7.73682e+07	8.31217e+07	9.65241e+07	8.77068e+07	9.64635e+07	9.74827e+07	9.29837e+07	5.32722e+07
Dominica	Exports of goods and services	1.52668e+08	1.26331e+08	1.28957e+08	1.22626e+08	1.38321e+08	1.29357e+08	1.41691e+08	1.42362e+08	1.48512e+08	1.37494e+08	1.65318e+08	1.58741e+08	1.60187e+08	1.38132e+08
Dominica	Imports of goods and services	1.95033e+08	1.72934e+08	1.63408e+08	1.53934e+08	1.84574e+08	1.96125e+08	1.97261e+08	2.30112e+08	2.75294e+08	2.34976e+08	2.40552e+08	2.26306e+08	2.0338e+08	2.05066e+08
Dominica	Gross Domestic Product (GDP)	3.29002e+08	3.30117e+08	3.23391e+08	3.48177e+08	3.57351e+08	3.56196e+08	3.7248e+08	3.94665e+08	4.25511e+08	4.20705e+08	4.25651e+08	4.26435e+08	4.21563e+08	4.17851e+08	-3.71196e+06
Dominica	Agriculture, hunting, forestry, fishing (ISIC A-B)	4.81324e+07	4.53297e+07	4.4249e+07	4.19594e+07	4.19991e+07	4.18467e+07	4.23753e+07	3.90249e+07	4.42888e+07	4.49423e+07	4.12175e+07	4.43728e+07	4.73374e+07	4.82772e+07
Dominica	Mining, Manufacturing, Utilities (ISIC C-E)	3.26966e+07	3.20956e+07	2.99433e+07	3.1878e+07	3.37227e+07	3.40833e+07	3.5495e+07	3.62925e+07	3.61358e+07	3.38977e+07	3.45761e+07	3.40099e+07	3.41385e+07	3.45159e+07
Dominica	Manufacturing (ISIC D)	1.5259e+07	1.43699e+07	1.27485e+07	1.39575e+07	1.49373e+07	1.45544e+07	1.53349e+07	1.47179e+07	1.29183e+07	1.25797e+07	1.23958e+07	1.1659e+07	1.20967e+07	1.25902e+07
Dominica	Construction (ISIC F)	1.0962e+07	1.14282e+07	7.50995e+06	1.02087e+07	1.24516e+07	1.334e+07	1.45483e+07	1.89269e+07	2.5097e+07	2.32727e+07	2.52861e+07	2.64245e+07	2.45968e+07	2.06604e+07
Dominica	Wholesale, retail trade, restaurants and hotels (ISIC G-H)	4.23966e+07	4.14507e+07	4.13422e+07	4.18139e+07	4.46315e+07	4.28119e+07	4.1546e+07	4.7494e+07	5.3853e+07	5.58142e+07	5.5867e+07	5.99536e+07	5.67451e+07	5.7843e+07
Dominica	Transport, storage and communication (ISIC I)	4.12291e+07	4.08182e+07	3.76793e+07	3.75099e+07	4.02673e+07	4.43793e+07	4.79149e+07	5.19109e+07	5.60006e+07	5.2565e+07	5.20131e+07	5.22189e+07	5.25442e+07	5.16873e+07
Dominica	Other Activities (ISIC J-P)	1.28537e+08	1.33498e+08	1.37861e+08	1.53713e+08	1.4885e+08	1.40691e+08	1.48087e+08	1.49582e+08	1.53558e+08	1.56692e+08	1.61619e+08	1.59951e+08	1.61324e+08	1.60172e+08
Dominica	Total Value Added	3.03622e+08	3.04376e+08	2.9851e+08	3.17058e+08	3.21906e+08	3.17152e+08	3.29989e+08	3.43366e+08	3.68604e+08	3.66822e+08	3.70306e+08	3.76465e+08	3.76146e+08	3.72816e+08
Dominican Republic	Final consumption expenditure	2.40429e+10	2.48833e+10	2.62906e+10	2.49921e+10	2.57626e+10	2.97416e+10	3.33009e+10	3.62798e+10	3.91163e+10	4.10329e+10	4.41386e+10	4.58047e+10	4.66963e+10	4.70191e+10
Dominican Republic	Household consumption expenditure (including Non-profit institutions serving households)	2.21881e+10	2.29095e+10	2.41811e+10	2.30722e+10	2.37767e+10	2.75018e+10	3.08034e+10	3.35452e+10	3.61699e+10	3.80642e+10	4.10067e+10	4.26049e+10	4.32932e+10	4.3712e+10
Dominican Republic	General government final consumption expenditure	1.89876e+09	2.07346e+09	2.23872e+09	1.95755e+09	2.03157e+09	2.23981e+09	2.48719e+09	2.73702e+09	2.94683e+09	2.84756e+09	2.94019e+09	2.95074e+09	3.28983e+09	3.07386e+09
Dominican Republic	Gross capital formation	6.97492e+09	6.7027e+09	6.93513e+09	4.99492e+09	4.87972e+09	5.51931e+09	6.6646e+09	7.49387e+09	8.18173e+09	6.9802e+09	8.2039e+09	7.99072e+09	8.33411e+09	8.1017e+09
Dominican Republic	Gross fixed capital formation (including Acquisitions less disposals of valuables)	6.11211e+09	5.86618e+09	6.16199e+09	4.91761e+09	4.82815e+09	5.47132e+09	6.63837e+09	7.46747e+09	8.15468e+09	6.94479e+09	8.16884e+09	7.95143e+09	8.29346e+09	8.05688e+09
Dominican Republic	Changes in inventories	5.86872e+08	5.68812e+08	5.27938e+08	6.56579e+07	4.84246e+07	4.79964e+07	3.7141e+07	3.97403e+07	4.22194e+07	4.4105e+07	4.75381e+07	4.96716e+07	5.15948e+07	5.36381e+07
Dominican Republic	Exports of goods and services	9.26443e+09	8.6981e+09	8.87035e+09	9.8136e+09	1.01657e+10	1.00395e+10	1.01052e+10	1.04303e+10	1.00108e+10	9.2676e+09	1.0341e+10	1.12548e+10	1.18596e+10	1.27626e+10
Dominican Republic	Imports of goods and services	1.20222e+10	1.14603e+10	1.16356e+10	1.01322e+10	1.06652e+10	1.18694e+10	1.28437e+10	1.37199e+10	1.43668e+10	1.29526e+10	1.48207e+10	1.52442e+10	1.53912e+10	1.48416e+10
Dominican Republic	Gross Domestic Product (GDP)	2.81122e+10	2.86208e+10	3.02774e+10	3.02007e+10	3.05969e+10	3.3431e+10	3.69985e+10	4.0134e+10	4.22433e+10	4.37024e+10	4.70899e+10	4.92009e+10	5.11137e+10	5.31911e+10	2.07747e+09
Dominican Republic	Agriculture, hunting, forestry, fishing (ISIC A-B)	1.94651e+09	2.13172e+09	2.1851e+09	2.22498e+09	2.16979e+09	2.2973e+09	2.49415e+09	2.52494e+09	2.44019e+09	2.74401e+09	2.89399e+09	3.05174e+09	3.17629e+09	3.31377e+09
Dominican Republic	Mining, Manufacturing, Utilities (ISIC C-E)	7.10259e+09	7.01615e+09	7.3899e+09	7.43062e+09	7.48503e+09	7.9393e+09	8.2269e+09	8.44669e+09	8.62316e+09	8.45696e+09	9.05203e+09	9.61553e+09	9.7972e+09	1.02161e+10
Dominican Republic	Manufacturing (ISIC D)	6.23078e+09	6.11252e+09	6.41302e+09	6.47154e+09	6.62759e+09	7.04775e+09	7.27656e+09	7.4518e+09	7.64672e+09	7.55712e+09	8.10037e+09	8.5982e+09	8.67396e+09	8.7453e+09
Dominican Republic	Construction (ISIC F)	2.18266e+09	2.09701e+09	2.19385e+09	1.81928e+09	1.77746e+09	1.94119e+09	2.41849e+09	2.49682e+09	2.48584e+09	2.38777e+09	2.64925e+09	2.68535e+09	2.70314e+09	2.90614e+09
Dominican Republic	Wholesale, retail trade, restaurants and hotels (ISIC G-H)	5.97256e+09	5.91458e+09	6.18068e+09	6.03882e+09	5.96776e+09	6.71352e+09	7.26927e+09	7.94183e+09	8.28654e+09	8.03059e+09	8.82198e+09	9.21793e+09	9.55347e+09	9.72916e+09
Dominican Republic	Transport, storage and communication (ISIC I)	1.78886e+09	2.14324e+09	2.4665e+09	2.60692e+09	2.77755e+09	3.30332e+09	3.89292e+09	4.3808e+09	5.06121e+09	5.59694e+09	6.03662e+09	6.01642e+09	6.21296e+09	6.42723e+09
Dominican Republic	Other Activities (ISIC J-P)	8.30797e+09	8.682e+09	9.18343e+09	9.5221e+09	9.58465e+09	9.6116e+09	1.03159e+10	1.10972e+10	1.16957e+10	1.23359e+10	1.30262e+10	1.35868e+10	1.41725e+10	1.48969e+10
Dominican Republic	Total Value Added	2.63739e+10	2.72634e+10	2.89861e+10	2.91498e+10	2.94005e+10	3.18062e+10	3.47475e+10	3.70534e+10	3.90437e+10	4.03104e+10	4.33162e+10	4.48879e+10	4.62921e+10	4.81374e+10
Ecuador	Final consumption expenditure	2.57303e+10	2.71867e+10	2.89131e+10	2.97017e+10	3.15284e+10	32884600000	3.42896e+10	3.58134e+10	3.80399e+10	3.83839e+10	4.11321e+10	4.34793e+10	4.52661e+10	4.7074e+10
Ecuador	Household consumption expenditure (including Non-profit institutions serving households)	2.15824e+10	2.31967e+10	2.48382e+10	2.55837e+10	2.72303e+10	28435900000	2.96735e+10	3.0931e+10	3.26019e+10	3.22791e+10	3.47686e+10	3.65517e+10	3.75423e+10	3.87388e+10
Ecuador	General government final consumption expenditure	4.10773e+09	3.97121e+09	4.06506e+09	4.1119e+09	4.2961e+09	4448700000	4.61749e+09	4.88014e+09	5.4204e+09	6.04988e+09	6.31533e+09	6.86459e+09	7.62732e+09	8.21671e+09
Ecuador	Gross capital formation	5.1636e+09	6.9027e+09	8.13664e+09	7.27539e+09	7.76081e+09	8980900000	9.67889e+09	1.00893e+10	1.23576e+10	1.14543e+10	1.26524e+10	1.41112e+10	1.46396e+10	1.63493e+10
Ecuador	Gross fixed capital formation (including Acquisitions less disposals of valuables)	5.10038e+09	6.13353e+09	7.24322e+09	7.2705e+09	7.65439e+09	8476800000	8.8992e+09	9.23038e+09	1.07049e+10	1.0319e+10	1.13705e+10	1.30004e+10	1.4373e+10	1.59104e+10
Ecuador	Changes in inventories	6.37434e+07	7.68289e+08	8.92411e+08	5.82423e+06	1.07183e+08	504100000	7.79143e+08	8.58248e+08	1.65052e+09	1.13416e+09	1.28055e+09	1.11007e+09	2.67896e+08	4.4003e+08
Ecuador	Exports of goods and services	8.48241e+09	8.34778e+09	8.39986e+09	9.0055e+09	1.05525e+10	11463500000	1.22804e+10	1.22825e+10	1.2649e+10	1.20433e+10	1.23431e+10	1.30427e+10	1.36562e+10	1.39772e+10
Ecuador	Imports of goods and services	6.49265e+09	8.16272e+09	9.71486e+09	9.32046e+09	1.03343e+10	11821900000	1.29774e+10	1.38929e+10	1.58989e+10	1.43218e+10	1.64449e+10	1.70446e+10	1.71801e+10	1.83874e+10
Ecuador	Gross Domestic Product (GDP)	3.27533e+10	3.40686e+10	3.54643e+10	3.643e+10	3.94212e+10	41507100000	4.33349e+10	4.4284e+10	4.70991e+10	4.73659e+10	4.90357e+10	5.2894e+10	5.56552e+10	5.82385e+10	2.58328e+09
Ecuador	Agriculture, hunting, forestry, fishing (ISIC A-B)	3.15275e+09	3.30929e+09	3.36775e+09	3.59027e+09	3.6759e+09	3935357000	4.10492e+09	4.24529e+09	4.31606e+09	4.39009e+09	4.42255e+09	4.65972e+09	4.71465e+09	5.07128e+09
Ecuador	Mining, Manufacturing, Utilities (ISIC C-E)	7.81244e+09	7.99472e+09	8.00588e+09	8.32055e+09	9.84425e+09	10167570000	1.0636e+10	1.04912e+10	1.11217e+10	1.10013e+10	1.13309e+10	1.20366e+10	1.23926e+10	1.2496e+10
Ecuador	Manufacturing (ISIC D)	5.17238e+09	5.29009e+09	5.38366e+09	5.37337e+09	5.60996e+09	5864209000	6.10522e+09	6.29802e+09	6.87197e+09	6.81912e+09	6.98284e+09	7.37182e+09	7.65609e+09	7.4414e+09
Ecuador	Construction (ISIC F)	1.73409e+09	2.1383e+09	2.58649e+09	2.56139e+09	2.69461e+09	2925666000	3.06016e+09	3.09069e+09	3.3641e+09	3.45872e+09	3.57732e+09	4.34854e+09	4.9576e+09	4.63172e+09
Ecuador	Wholesale, retail trade, restaurants and hotels (ISIC G-H)	4.38986e+09	4.61093e+09	4.74184e+09	4.88973e+09	5.09237e+09	5399901000	5.6351e+09	5.66036e+09	6.22627e+09	6.08766e+09	6.30305e+09	6.75303e+09	7.01319e+09	7.64505e+09
Ecuador	Transport, storage and communication (ISIC I)	3.34015e+09	3.4886e+09	3.55464e+09	3.70908e+09	3.8851e+09	4205648000	4.5061e+09	4.71724e+09	5.1787e+09	5.54139e+09	5.84205e+09	6.34503e+09	6.73652e+09	7.20384e+09
Ecuador	Other Activities (ISIC J-P)	1.05998e+10	1.06827e+10	1.11041e+10	1.13838e+10	1.19725e+10	12571002000	1.30878e+10	1.36996e+10	1.43052e+10	1.48413e+10	1.55328e+10	1.64086e+10	1.72726e+10	1.87477e+10
Ecuador	Total Value Added	3.09056e+10	3.21246e+10	3.32839e+10	3.43604e+10	3.7199e+10	39205144000	4.10134e+10	4.18141e+10	4.4394e+10	4.51245e+10	4.67787e+10	5.03484e+10	5.28878e+10	5.53997e+10
Egypt	Final consumption expenditure	6.74705e+10	7.02479e+10	7.21788e+10	7.38848e+10	7.58994e+10	7.93341e+10	8.40521e+10	8.90705e+10	9.37458e+10	9.90595e+10	1.03179e+11	1.08627e+11	1.14654e+11	1.17921e+11
Egypt	Household consumption expenditure (including Non-profit institutions serving households)	5.87695e+10	6.11121e+10	6.25636e+10	6.39539e+10	6.56581e+10	6.88286e+10	7.32582e+10	7.834e+10	8.28354e+10	8.75432e+10	9.11381e+10	9.61569e+10	1.01837e+11	1.04648e+11
Egypt	General government final consumption expenditure	8.72789e+09	9.15494e+09	9.60868e+09	9.91404e+09	1.02194e+10	1.05055e+10	1.08326e+10	1.0853e+10	1.10834e+10	1.17006e+10	1.22278e+10	1.26906e+10	1.30892e+10	1.35426e+10
Egypt	Gross capital formation	1.47721e+10	1.41783e+10	1.48908e+10	1.42452e+10	1.50629e+10	1.66135e+10	1.88287e+10	2.33033e+10	2.68967e+10	2.44516e+10	2.64017e+10	2.58467e+10	2.79018e+10	2.52208e+10
Egypt	Gross fixed capital formation (including Acquisitions less disposals of valuables)	1.3531e+10	1.32349e+10	1.39638e+10	1.31364e+10	1.40052e+10	1.59968e+10	1.82025e+10	2.25283e+10	2.64184e+10	2.37218e+10	2.55591e+10	2.41218e+10	2.42996e+10	2.2394e+10
Egypt	Changes in inventories	1.58313e+09	1.14942e+09	1.11176e+09	1.39539e+09	1.30397e+09	6.16751e+08	5.9021e+08	7.30472e+08	2.21355e+08	6.4193e+08	7.74743e+08	2.10287e+09	4.86981e+09	2.63782e+09
Egypt	Exports of goods and services	1.87014e+10	1.93168e+10	1.78125e+10	1.99172e+10	2.45885e+10	2.95558e+10	3.58396e+10	4.41847e+10	5.69006e+10	4.8643e+10	4.71916e+10	4.778e+10	4.66816e+10	4.86026e+10
Egypt	Imports of goods and services	2.27133e+10	2.24577e+10	2.1116e+10	2.13864e+10	2.50737e+10	3.10472e+10	3.78073e+10	4.86971e+10	6.15062e+10	5.05042e+10	4.89083e+10	5.302e+10	5.87463e+10	5.81115e+10
Egypt	Gross Domestic Product (GDP)	7.88344e+10	8.16126e+10	8.42124e+10	8.6835e+10	9.04133e+10	9.44563e+10	1.00921e+11	1.08074e+11	1.15807e+11	1.21233e+11	1.27464e+11	1.29719e+11	1.32573e+11	1.35357e+11	2.78404e+09
Egypt	Agriculture, hunting, forestry, fishing (ISIC A-B)	1.09313e+10	1.13369e+10	1.17451e+10	1.23164e+10	1.2555e+10	1.28959e+10	1.33149e+10	1.38049e+10	1.4267e+10	1.47194e+10	1.52308e+10	1.56454e+10	1.61021e+10	1.65887e+10
Egypt	Mining, Manufacturing, Utilities (ISIC C-E)	2.47011e+10	2.51681e+10	2.59898e+10	2.77273e+10	2.8549e+10	2.93899e+10	3.30107e+10	3.48867e+10	3.6985e+10	3.8853e+10	4.01279e+10	4.01397e+10	4.04446e+10	4.15681e+10
Egypt	Manufacturing (ISIC D)	1.29537e+10	1.35341e+10	1.40725e+10	1.43347e+10	1.48557e+10	1.55402e+10	1.64414e+10	1.76358e+10	1.90514e+10	1.97607e+10	2.07613e+10	2.05641e+10	2.07155e+10	2.1022e+10
Egypt	Construction (ISIC F)	3.41637e+09	3.48796e+09	3.56171e+09	3.37752e+09	3.53565e+09	3.71334e+09	4.23431e+09	4.90523e+09	5.67367e+09	6.32143e+09	7.15351e+09	7.41652e+09	7.66149e+09	7.77873e+09
Egypt	Wholesale, retail trade, restaurants and hotels (ISIC G-H)	1.19293e+10	1.20091e+10	1.21834e+10	1.07882e+10	1.18323e+10	1.27188e+10	1.34842e+10	1.47518e+10	1.63712e+10	1.71473e+10	1.84653e+10	1.83638e+10	1.87466e+10	1.93315e+10
Egypt	Transport, storage and communication (ISIC I)	7.45933e+09	7.99016e+09	8.08925e+09	8.65904e+09	9.38159e+09	1.02618e+10	1.11551e+10	1.24329e+10	1.40074e+10	1.49086e+10	1.58358e+10	1.68025e+10	1.74641e+10	1.74144e+10
Egypt	Other Activities (ISIC J-P)	1.63202e+10	1.7073e+10	1.7848e+10	1.95641e+10	2.01549e+10	2.08166e+10	2.17084e+10	2.28405e+10	2.39369e+10	2.45988e+10	2.57868e+10	2.66111e+10	2.73467e+10	2.77272e+10
Egypt	Total Value Added	7.47115e+10	7.70358e+10	7.94354e+10	8.25696e+10	8.6079e+10	8.97964e+10	9.6718e+10	1.03278e+11	1.10682e+11	1.15834e+11	1.2178e+11	1.24139e+11	1.26913e+11	1.2956e+11
El Salvador	Final consumption expenditure	1.51979e+10	1.56904e+10	1.59235e+10	1.62205e+10	1.66676e+10	17510775261	1.83433e+10	1.94217e+10	1.97466e+10	1.79343e+10	1.83352e+10	1.87931e+10	1.92715e+10	1.94259e+10
El Salvador	Household consumption expenditure (including Non-profit institutions serving households)	1.36966e+10	1.41248e+10	1.43517e+10	1.46465e+10	1.50711e+10	15870620261	1.6658e+10	1.77084e+10	1.80312e+10	1.61797e+10	1.65409e+10	1.69353e+10	1.73674e+10	1.74278e+10
El Salvador	General government final consumption expenditure	1.52324e+09	1.59265e+09	1.5944e+09	1.5894e+09	1.60638e+09	1640155000	1.67599e+09	1.68353e+09	1.67754e+09	1.77566e+09	1.81585e+09	1.88526e+09	1.93195e+09	2.0483e+09
El Salvador	Gross capital formation	2.50493e+09	2.63176e+09	2.56145e+09	2.76213e+09	2.65313e+09	2749098733	3.06873e+09	3.15546e+09	2.98365e+09	2.40998e+09	2.46754e+09	2.80781e+09	2.76789e+09	3.03613e+09
El Salvador	Gross fixed capital formation (including Acquisitions less disposals of valuables)	2.51072e+09	2.54868e+09	2.63202e+09	2.69767e+09	2.56214e+09	2610925420	2.93452e+09	3.15949e+09	2.98747e+09	2.41306e+09	2.47069e+09	2.81139e+09	2.77143e+09	3.04001e+09
El Salvador	Changes in inventories	-2.52402e+06	8.43023e+07	-6.56245e+07	6.62976e+07	9.20426e+07	138173313	1.34705e+08
El Salvador	Exports of goods and services	3.78705e+09	3.77936e+09	4.00569e+09	4.19289e+09	4.34366e+09	4382787000	4.64065e+09	4.96944e+09	5.31048e+09	4.46246e+09	4.98073e+09	5.44289e+09	5.03733e+09	5.27153e+09
El Salvador	Imports of goods and services	6.3599e+09	6.62878e+09	6.72623e+09	7.05239e+09	7.23486e+09	7548866900	8.2218e+09	8.94561e+09	9.23992e+09	6.94597e+09	7.67004e+09	8.49794e+09	8.11961e+09	8.48158e+09
El Salvador	Gross Domestic Product (GDP)	1.52191e+10	1.54791e+10	1.58415e+10	1.62059e+10	1.65058e+10	1.70938e+10	1.77625e+10	1.84446e+10	1.86795e+10	1.80943e+10	1.83413e+10	1.87479e+10	1.91006e+10	1.94205e+10	3.19986e+08
El Salvador	Agriculture, hunting, forestry, fishing (ISIC A-B)	1.57424e+09	1.53256e+09	1.53865e+09	1.55249e+09	1.59604e+09	1676970137	1.77217e+09	1.92195e+09	1.98027e+09	1.92297e+09	1.98298e+09	1.93424e+09	2.00114e+09	1.99221e+09
El Salvador	Mining, Manufacturing, Utilities (ISIC C-E)	3.55011e+09	3.69845e+09	3.81233e+09	3.90083e+09	3.92868e+09	4000754891	4.09283e+09	4.19214e+09	4.2837e+09	4.15132e+09	4.2218e+09	4.33946e+09	4.39472e+09	4.48372e+09
El Salvador	Manufacturing (ISIC D)	3.24477e+09	3.37594e+09	3.47448e+09	3.55234e+09	3.58636e+09	3648128583	3.72825e+09	3.82115e+09	3.91e+09	3.79374e+09	3.86722e+09	3.97308e+09	4.0234e+09	4.10707e+09
El Salvador	Construction (ISIC F)	6.34557e+08	6.95586e+08	7.41882e+08	7.65442e+08	6.90669e+08	716687006	7.62489e+08	7.09877e+08	6.58057e+08	6.39631e+08	6.07648e+08	6.61966e+08	6.6412e+08	6.63861e+08
El Salvador	Wholesale, retail trade, restaurants and hotels (ISIC G-H)	2.9368e+09	2.993e+09	3.03677e+09	3.11737e+09	3.19173e+09	3357609305	3.51326e+09	3.66465e+09	3.7e+09	3.49992e+09	3.55281e+09	3.63538e+09	3.72879e+09	3.80768e+09
El Salvador	Transport, storage and communication (ISIC I)	1.23251e+09	1.2849e+09	1.34966e+09	1.39604e+09	1.47122e+09	1569361932	1.67737e+09	1.75764e+09	1.74406e+09	1.64192e+09	1.63786e+09	1.71361e+09	1.74055e+09	1.77843e+09
El Salvador	Other Activities (ISIC J-P)	4.80898e+09	4.78145e+09	4.84699e+09	4.93125e+09	5.03099e+09	5129842664	5.26273e+09	5.43726e+09	5.51084e+09	5.49484e+09	5.5975e+09	5.73393e+09	5.79841e+09	5.92775e+09
El Salvador	Total Value Added	1.47011e+10	1.49531e+10	1.52925e+10	1.56295e+10	1.58896e+10	16451225934	1.70971e+10	1.77314e+10	1.79382e+10	1.73777e+10	1.76351e+10	1.80313e+10	1.8355e+10	1.86709e+10
Equatorial Guinea	Final consumption expenditure	3.14069e+08	3.62115e+08	5.78598e+08	5.76142e+08	6.63355e+08	7.73112e+08	7.57217e+08	8.06192e+08	8.86558e+08	9.22355e+08	9.39404e+08	1.11477e+09	1.2626e+09	1.33455e+09
Equatorial Guinea	Household consumption expenditure (including Non-profit institutions serving households)	2.16675e+08	2.46247e+08	3.82379e+08	4.04818e+08	4.86289e+08	5.4828e+08	5.31386e+08	5.705e+08	5.95632e+08	6.13519e+08	6.01862e+08	7.44503e+08	8.63623e+08	8.95771e+08
Equatorial Guinea	General government final consumption expenditure	1.04045e+08	1.27461e+08	2.26909e+08	1.75465e+08	1.59666e+08	2.24833e+08	2.32002e+08	2.37054e+08	3.27269e+08	3.53413e+08	4.08192e+08	4.20846e+08	4.33892e+08	4.94409e+08
Equatorial Guinea	Gross capital formation	8.8281e+08	1.40111e+09	1.13988e+09	1.41395e+09	1.42133e+09	1.56327e+09	1.66297e+09	1.9601e+09	2.40461e+09	3.00528e+09	2.91212e+09	2.71701e+09	3.00229e+09	3.07173e+09
Equatorial Guinea	Gross fixed capital formation (including Acquisitions less disposals of valuables)	8.82596e+08	1.40077e+09	1.1396e+09	1.41361e+09	1.42099e+09	1.56289e+09	1.66256e+09	1.95962e+09	2.40403e+09	3.00456e+09	2.91141e+09	2.71635e+09	3.00157e+09	3.07114e+09
Equatorial Guinea	Exports of goods and services	3.26966e+09	5.12683e+09	5.50527e+09	5.8227e+09	6.90579e+09	7.1003e+09	6.92071e+09	7.39041e+09	7.75107e+09	7.67726e+09	7.2243e+09	7.03647e+09	6.88167e+09	6.24983e+09
Equatorial Guinea	Imports of goods and services	1.43796e+09	2.16369e+09	1.8709e+09	2.14623e+09	2.07939e+09	2.23118e+09	2.23465e+09	2.35665e+09	2.71826e+09	3.38235e+09	3.19632e+09	2.88308e+09	3.32996e+09	3.31035e+09
Equatorial Guinea	Gross Domestic Product (GDP)	2.15838e+09	3.62177e+09	4.36181e+09	4.98991e+09	6.61662e+09	7.2055e+09	7.60901e+09	9.43518e+09	1.09542e+10	1.14034e+10	1.15516e+10	1.14823e+10	1.20909e+10	1.15054e+10	-5.85437e+08
Equatorial Guinea	Agriculture, hunting, forestry, fishing (ISIC A-B)	1.36357e+08	1.33824e+08	1.20782e+08	1.3274e+08	1.30748e+08	1.40816e+08	1.47434e+08	1.58787e+08	1.55294e+08	1.55604e+08	1.56382e+08	1.57477e+08	1.44879e+08	1.50472e+08
Equatorial Guinea	Mining, Manufacturing, Utilities (ISIC C-E)	1.77499e+09	3.33905e+09	4.099e+09	4.67463e+09	6.27332e+09	6.67998e+09	6.5912e+09	8.26343e+09	9.78536e+09	9.53551e+09	9.56231e+09	9.60973e+09	1.00473e+10	9.57132e+09
Equatorial Guinea	Manufacturing (ISIC D)	3.4561e+06	3.9842e+06	4.52605e+06	5.30905e+06	6.40272e+06	7.536e+06	8.86987e+06	1.01471e+07	1.27651e+07	1.36076e+07	1.64108e+07	1.97914e+07	2.38684e+07	1.96297e+07
Equatorial Guinea	Construction (ISIC F)	1.72358e+07	3.04213e+07	4.24229e+07	4.71319e+07	9.794e+07	1.26832e+08	2.25508e+08	2.94964e+08	3.21216e+08	4.74757e+08	4.31554e+08	3.70705e+08	3.97767e+08	3.93263e+08
Equatorial Guinea	Wholesale, retail trade, restaurants and hotels (ISIC G-H)	2.42993e+07	3.19389e+07	3.75361e+07	4.33167e+07	5.51422e+07	6.10975e+07	6.52522e+07	6.81233e+07	7.25513e+07	7.52357e+07	7.79441e+07	8.03604e+07	8.35748e+07	7.92276e+07
Equatorial Guinea	Transport, storage and communication (ISIC I)	5.18948e+06	5.9679e+06	7.24657e+06	8.5437e+06	8.84273e+06	9.79775e+06	1.0464e+07	1.04326e+07	1.11107e+07	1.14107e+07	1.18215e+07	1.2188e+07	1.26755e+07	1.20162e+07
Equatorial Guinea	Other Activities (ISIC J-P)	4.62872e+07	6.11578e+07	7.00142e+07	8.73768e+07	9.90421e+07	1.29642e+08	1.41852e+08	1.65363e+08	1.838e+08	2.1655e+08	3.21053e+08	3.48637e+08	3.68433e+08	3.39901e+08
Equatorial Guinea	Total Value Added	2.1219e+09	3.59108e+09	4.31221e+09	4.92192e+09	6.5689e+09	7.14817e+09	7.49974e+09	9.30655e+09	1.07828e+10	1.12272e+10	1.13438e+10	1.12331e+10	1.17458e+10	1.12437e+10
Eritrea	Final consumption expenditure	1.25223e+09	1.24652e+09	1.34554e+09	1.47492e+09	1.52458e+09	1.41076e+09	1.23764e+09	1.17354e+09	1.06483e+09	1.13879e+09	1.16836e+09	9.91036e+08	9.0851e+08	9.60889e+08
Eritrea	Household consumption expenditure (including Non-profit institutions serving households)	7.21692e+08	8.02996e+08	9.2735e+08	9.65181e+08	1.11242e+09	1.02374e+09	9.66341e+08	9.02985e+08	7.89283e+08	8.78618e+08	8.25074e+08	6.79196e+08	6.13653e+08	6.59641e+08
Eritrea	General government final consumption expenditure	5.19934e+08	4.37763e+08	4.15408e+08	5.03777e+08	4.1251e+08	3.8702e+08	2.75171e+08	2.7347e+08	2.76486e+08	2.63136e+08	3.41991e+08	3.09574e+08	2.92269e+08	2.99114e+08
Eritrea	Gross capital formation	2.19556e+08	3.81975e+08	3.175e+08	3.06868e+08	2.52025e+08	2.23413e+08	1.33966e+08	1.17744e+08	1.11089e+08	9.66182e+07	1.03821e+08	1.18923e+08	1.21356e+08	1.18623e+08
Eritrea	Gross fixed capital formation (including Acquisitions less disposals of valuables)	2.19556e+08	3.81975e+08	3.175e+08	3.06868e+08	2.52025e+08	2.23413e+08	1.33966e+08	1.17744e+08	1.11089e+08	9.66182e+07	1.03821e+08	1.18923e+08	1.21356e+08	1.18623e+08
Eritrea	Exports of goods and services	6.56824e+07	7.63213e+07	8.29811e+07	6.20249e+07	6.84306e+07	6.77257e+07	7.79513e+07	6.77164e+07	5.32433e+07	7.25246e+07	8.52169e+07	2.83824e+08	4.1815e+08	4.12485e+08
Eritrea	Imports of goods and services	5.7178e+08	6.55331e+08	6.67696e+08	7.8457e+08	7.73607e+08	6.03478e+08	3.69203e+08	2.59058e+08	2.33201e+08	2.81106e+08	3.12873e+08	3.45904e+08	3.78841e+08	4.05731e+08
Eritrea	Gross Domestic Product (GDP)	9.67942e+08	1.05269e+09	1.08433e+09	1.05553e+09	1.07086e+09	1.09842e+09	1.08778e+09	1.1033e+09	9.95363e+08	1.03395e+09	1.05664e+09	1.14833e+09	1.22894e+09	1.24295e+09	1.40137e+07
Eritrea	Agriculture, hunting, forestry, fishing (ISIC A-B)	1.35985e+08	1.73285e+08	1.13017e+08	1.24869e+08	1.13963e+08	2.48244e+08	2.67594e+08	2.67726e+08	1.66985e+08	1.46037e+08	1.94303e+08	1.88668e+08	2.00493e+08	2.11853e+08
Eritrea	Mining, Manufacturing, Utilities (ISIC C-E)	1.12147e+08	1.15984e+08	1.25251e+08	1.07532e+08	1.03765e+08	9.00579e+07	7.85033e+07	7.55474e+07	8.44036e+07	7.38366e+07	7.9136e+07	8.84608e+07	9.1491e+07	9.37916e+07
Eritrea	Manufacturing (ISIC D)	1.00564e+08	1.04659e+08	1.12753e+08	9.60512e+07	9.18812e+07	7.50013e+07	6.51011e+07	6.0277e+07	6.49366e+07	5.67923e+07	6.15666e+07	6.83e+07	7.07345e+07	7.26307e+07
Eritrea	Construction (ISIC F)	9.48819e+07	1.01097e+08	1.14542e+08	1.00372e+08	1.06259e+08	1.34706e+08	1.1896e+08	1.36233e+08	1.73542e+08	1.51764e+08	1.56597e+08	1.7965e+08	1.84926e+08	1.88566e+08
Eritrea	Wholesale, retail trade, restaurants and hotels (ISIC G-H)	1.77369e+08	1.85518e+08	2.0082e+08	2.05431e+08	2.14004e+08	1.79332e+08	1.81223e+08	1.86434e+08	1.73651e+08	2.05246e+08	1.9088e+08	2.11911e+08	2.30916e+08	2.29153e+08
Eritrea	Transport, storage and communication (ISIC I)	1.13615e+08	1.18802e+08	1.28625e+08	1.31574e+08	1.37059e+08	1.14858e+08	1.16068e+08	1.19405e+08	1.11219e+08	1.31454e+08	1.22253e+08	1.35723e+08	1.47894e+08	1.46766e+08
Eritrea	Other Activities (ISIC J-P)	2.67177e+08	2.71713e+08	2.83785e+08	3.00113e+08	3.09457e+08	2.58218e+08	2.62577e+08	2.69387e+08	2.50853e+08	2.96816e+08	2.75872e+08	3.06288e+08	3.33813e+08	3.31221e+08
Eritrea	Total Value Added	9.01175e+08	9.66399e+08	9.66039e+08	9.69891e+08	9.84507e+08	1.02542e+09	1.02492e+09	1.05473e+09	9.60653e+08	1.00515e+09	1.01904e+09	1.1107e+09	1.18953e+09	1.20135e+09
Estonia	Final consumption expenditure	7.15787e+09	7.55138e+09	8.12636e+09	8.75295e+09	9.32042e+09	1.00333e+10	1.11232e+10	1.20583e+10	1.17318e+10	1.02938e+10	1.01645e+10	1.03915e+10	1.08722e+10	1.12569e+10
Estonia	Household consumption expenditure (including Non-profit institutions serving households)	5.13416e+09	5.46688e+09	5.98279e+09	6.5283e+09	7.03461e+09	7.68718e+09	8.66043e+09	9.43729e+09	8.97544e+09	7.60619e+09	7.48581e+09	7.66933e+09	8.06364e+09	8.37005e+09
Estonia	General government final consumption expenditure	1.99688e+09	2.06007e+09	2.12492e+09	2.21101e+09	2.27765e+09	2.34613e+09	2.47332e+09	2.63621e+09	2.75535e+09	2.66611e+09	2.65554e+09	2.69977e+09	2.78813e+09	2.8673e+09
Estonia	Gross capital formation	2.33278e+09	2.61608e+09	3.24023e+09	3.8161e+09	4.02627e+09	4.64331e+09	5.70352e+09	6.29161e+09	5.46741e+09	3.46109e+09	3.37033e+09	4.48153e+09	4.94898e+09	5.07025e+09
Estonia	Gross fixed capital formation (including Acquisitions less disposals of valuables)	2.31588e+09	2.59713e+09	3.21677e+09	3.78846e+09	3.99711e+09	4.60968e+09	5.66221e+09	6.24605e+09	5.42781e+09	3.43602e+09	3.34592e+09	4.44907e+09	4.91314e+09	5.03353e+09
Estonia	Exports of goods and services	5.44711e+09	5.79207e+09	5.95544e+09	6.56126e+09	7.69582e+09	9.22911e+09	1.01087e+10	1.13838e+10	1.1486e+10	9.15344e+09	1.13546e+10	1.38802e+10	1.50308e+10	1.54145e+10
Estonia	Imports of goods and services	5.05592e+09	5.6811e+09	6.4359e+09	7.33711e+09	8.52104e+09	9.94396e+09	1.20027e+10	1.35608e+10	1.27256e+10	8.83078e+09	1.06869e+10	1.355e+10	1.52003e+10	1.56784e+10
Estonia	Gross Domestic Product (GDP)	9.91997e+09	1.05308e+10	1.11755e+10	1.20115e+10	1.27895e+10	1.40008e+10	1.54587e+10	1.66801e+10	1.57913e+10	1.34641e+10	1.37975e+10	1.49394e+10	1.56341e+10	1.58889e+10	2.54859e+08
Estonia	Agriculture, hunting, forestry, fishing (ISIC A-B)	4.80931e+08	4.36537e+08	4.39683e+08	4.74937e+08	4.38039e+08	4.34163e+08	4.28175e+08	4.94317e+08	4.98614e+08	4.97535e+08	5.48059e+08	6.37713e+08	7.43348e+08	7.14235e+08
Estonia	Mining, Manufacturing, Utilities (ISIC C-E)	1.88441e+09	2.07503e+09	2.18523e+09	2.38496e+09	2.44501e+09	2.63063e+09	2.87419e+09	3.04956e+09	2.86268e+09	2.35094e+09	2.71398e+09	3.04074e+09	3.09928e+09	3.2069e+09
Estonia	Manufacturing (ISIC D)	1.39748e+09	1.58009e+09	1.69947e+09	1.82651e+09	1.88168e+09	2.06357e+09	2.28903e+09	2.40273e+09	2.31245e+09	1.78055e+09	2.11424e+09	2.46735e+09	2.54282e+09	2.58313e+09
Estonia	Construction (ISIC F)	6.44109e+08	6.42404e+08	7.19831e+08	7.89208e+08	8.47374e+08	1.0615e+09	1.14935e+09	1.27713e+09	1.32009e+09	8.63922e+08	8.31591e+08	1.09183e+09	1.17381e+09	1.12747e+09
Estonia	Wholesale, retail trade, restaurants and hotels (ISIC G-H)	1.32866e+09	1.45165e+09	1.61339e+09	1.71586e+09	1.88082e+09	1.99711e+09	2.30518e+09	2.45179e+09	2.11665e+09	1.60088e+09	1.71683e+09	1.99623e+09	2.13039e+09	2.28137e+09
Estonia	Transport, storage and communication (ISIC I)	1.17876e+09	1.24325e+09	1.26273e+09	1.38607e+09	1.51679e+09	1.62733e+09	1.77975e+09	1.91948e+09	1.81474e+09	1.62178e+09	1.66771e+09	1.79223e+09	1.95371e+09	2.00384e+09
Estonia	Other Activities (ISIC J-P)	3.54516e+09	3.68939e+09	3.81972e+09	4.03633e+09	4.25106e+09	4.64736e+09	5.076e+09	5.42031e+09	5.44187e+09	4.99544e+09	4.92571e+09	4.94721e+09	5.04874e+09	5.11392e+09
Estonia	Total Value Added	9.04239e+09	9.53805e+09	1.0032e+10	1.07756e+10	1.13819e+10	1.23981e+10	1.36218e+10	1.46077e+10	1.40496e+10	1.1963e+10	1.24248e+10	1.34729e+10	1.4087e+10	1.43997e+10
Ethiopia	Final consumption expenditure	7.76953e+09	8.20206e+09	8.32772e+09	8.24191e+09	8.72645e+09	1.10098e+10	1.25162e+10	1.39827e+10	1.55859e+10	1.75671e+10	2.00201e+10	2.07469e+10	2.20074e+10	2.34525e+10
Ethiopia	Household consumption expenditure (including Non-profit institutions serving households)	6.1405e+09	6.79047e+09	7.01109e+09	7.01306e+09	7.29976e+09	9.39774e+09	1.07215e+10	1.21374e+10	1.37083e+10	1.55255e+10	1.78126e+10	1.83249e+10	1.97089e+10	2.09193e+10
Ethiopia	General government final consumption expenditure	1.70542e+09	1.44433e+09	1.33175e+09	1.23227e+09	1.44984e+09	1.61208e+09	1.78882e+09	1.81383e+09	1.8147e+09	1.95911e+09	2.09491e+09	2.32625e+09	2.15488e+09	2.39317e+09
Ethiopia	Gross capital formation	2.08767e+09	2.29893e+09	2.29491e+09	2.09111e+09	3.06089e+09	3.16266e+09	3.83315e+09	3.98568e+09	4.34876e+09	5.66171e+09	6.6572e+09	8.21822e+09	1.16301e+10	1.28929e+10
Ethiopia	Gross fixed capital formation (including Acquisitions less disposals of valuables)	2.08767e+09	2.29893e+09	2.29491e+09	2.09111e+09	3.06089e+09	3.16266e+09	3.83315e+09	3.98568e+09	4.34876e+09	5.66171e+09	6.6572e+09	8.21822e+09	1.16301e+10	1.28929e+10
Ethiopia	Exports of goods and services	9.3712e+08	9.70043e+08	1.026e+09	1.18338e+09	1.74043e+09	1.85509e+09	1.89207e+09	2.15519e+09	2.01903e+09	2.54168e+09	2.42808e+09	2.4923e+09	2.36213e+09	2.82407e+09
Ethiopia	Imports of goods and services	2.10581e+09	2.11658e+09	2.1505e+09	2.26424e+09	3.12829e+09	4.35888e+09	5.16016e+09	5.54697e+09	5.70799e+09	7.80631e+09	9.14054e+09	9.04868e+09	1.11429e+10	1.19105e+10
Ethiopia	Gross Domestic Product (GDP)	8.9043e+09	9.64348e+09	9.78954e+09	9.57798e+09	1.0878e+10	1.21636e+10	1.34815e+10	1.50259e+10	1.6647e+10	1.81124e+10	2.03856e+10	2.26449e+10	2.46207e+10	2.71721e+10	2.55131e+09
Ethiopia	Agriculture, hunting, forestry, fishing (ISIC A-B)	3.98031e+09	4.37324e+09	4.29277e+09	3.84226e+09	4.49193e+09	5.10013e+09	5.65594e+09	6.1903e+09	6.65539e+09	7.07944e+09	7.61927e+09	8.3018e+09	8.71042e+09	9.3282e+09
Ethiopia	Mining, Manufacturing, Utilities (ISIC C-E)	6.73142e+08	6.98538e+08	7.29241e+08	7.45073e+08	7.88419e+08	8.69907e+08	9.54274e+08	1.01035e+09	1.11564e+09	1.21274e+09	1.38463e+09	1.69841e+09	1.91187e+09	2.10097e+09
Ethiopia	Manufacturing (ISIC D)	4.54541e+08	4.70762e+08	4.76793e+08	4.80549e+08	5.12216e+08	5.77746e+08	6.38941e+08	6.92278e+08	7.63644e+08	8.32987e+08	9.29548e+08	1.09609e+09	1.22547e+09	1.3574e+09
Ethiopia	Construction (ISIC F)	3.30289e+08	3.56781e+08	4.14675e+08	4.71247e+08	5.63236e+08	6.05785e+08	6.69307e+08	7.42318e+08	8.2651e+08	9.23032e+08	1.02354e+09	1.15439e+09	1.43628e+09	1.88027e+09
Ethiopia	Wholesale, retail trade, restaurants and hotels (ISIC G-H)	1.23062e+09	1.29786e+09	1.34438e+09	1.39133e+09	1.46359e+09	1.65212e+09	1.94578e+09	2.29831e+09	2.68523e+09	3.04551e+09	3.39796e+09	3.70552e+09	4.1516e+09	4.62882e+09
Ethiopia	Transport, storage and communication (ISIC I)	3.65429e+08	4.15367e+08	4.38754e+08	4.84665e+08	5.30855e+08	6.33046e+08	6.69035e+08	7.31482e+08	8.15342e+08	8.88048e+08	1.0163e+09	1.11502e+09	1.25387e+09	1.47148e+09
Ethiopia	Other Activities (ISIC J-P)	1.85633e+09	1.90939e+09	1.95266e+09	2.07057e+09	2.19068e+09	2.42339e+09	2.7238e+09	3.10298e+09	3.60609e+09	4.13685e+09	4.6733e+09	5.33477e+09	5.80864e+09	6.21139e+09
Ethiopia	Total Value Added	8.50202e+09	9.14835e+09	9.22811e+09	8.9513e+09	1.00134e+10	1.12844e+10	1.26286e+10	1.40817e+10	1.56607e+10	1.71809e+10	1.89381e+10	2.10293e+10	2.286e+10	2.50676e+10
Ethiopia (Former)	Final consumption expenditure
Ethiopia (Former)	Household consumption expenditure (including Non-profit institutions serving households)
Ethiopia (Former)	General government final consumption expenditure
Ethiopia (Former)	Gross capital formation
Ethiopia (Former)	Gross fixed capital formation (including Acquisitions less disposals of valuables)
Ethiopia (Former)	Exports of goods and services
Ethiopia (Former)	Imports of goods and services
Ethiopia (Former)	Gross Domestic Product (GDP)															0
Ethiopia (Former)	Agriculture, hunting, forestry, fishing (ISIC A-B)
Ethiopia (Former)	Mining, Manufacturing, Utilities (ISIC C-E)
Ethiopia (Former)	Manufacturing (ISIC D)
Ethiopia (Former)	Construction (ISIC F)
Ethiopia (Former)	Wholesale, retail trade, restaurants and hotels (ISIC G-H)
Ethiopia (Former)	Transport, storage and communication (ISIC I)
Ethiopia (Former)	Other Activities (ISIC J-P)
Ethiopia (Former)	Total Value Added
Fiji	Final consumption expenditure	2.26773e+09	2.37822e+09	2.36234e+09	2.45667e+09	2.79581e+09	2.69373e+09	2.99555e+09	2.95989e+09	3.04918e+09	2.73726e+09	2.6868e+09	2.53858e+09	2.72884e+09	2.82091e+09
Fiji	Household consumption expenditure (including Non-profit institutions serving households)	1.8183e+09	1.91494e+09	1.89745e+09	1.99438e+09	2.31894e+09	2.22476e+09	2.43795e+09	2.43802e+09	2.57458e+09	2.23166e+09	2.23459e+09	2.11172e+09	2.25423e+09	2.34092e+09
Fiji	General government final consumption expenditure	4.49429e+08	4.63278e+08	4.64893e+08	4.62285e+08	4.76866e+08	4.68963e+08	5.57604e+08	5.21869e+08	4.74595e+08	5.05606e+08	4.5222e+08	4.26857e+08	4.74617e+08	4.79988e+08
Fiji	Gross capital formation	6.06023e+08	5.78191e+08	5.80895e+08	5.64458e+08	5.37066e+08	6.36914e+08	6.37425e+08	5.3314e+08	6.65305e+08	5.35189e+08	4.75731e+08	6.22422e+08	5.59085e+08	5.87182e+08
Fiji	Gross fixed capital formation (including Acquisitions less disposals of valuables)	4.81569e+08	4.88895e+08	4.98881e+08	4.84478e+08	4.56076e+08	5.43476e+08	5.39929e+08	4.66638e+08	5.86841e+08	4.13628e+08	3.88689e+08	5.22289e+08	4.53302e+08	4.83398e+08
Fiji	Changes in inventories	1.24455e+08	8.92954e+07	8.20143e+07	7.99798e+07	8.099e+07	9.34377e+07	9.74952e+07	6.65016e+07	7.84635e+07	1.21561e+08	8.70423e+07	1.00133e+08	1.05783e+08	1.03784e+08
Fiji	Exports of goods and services	1.4949e+09	1.46834e+09	1.46489e+09	1.549e+09	1.47338e+09	1.5196e+09	1.43267e+09	1.41451e+09	1.59717e+09	1.49337e+09	1.74305e+09	1.87747e+09	1.75106e+09	1.90497e+09
Fiji	Imports of goods and services	1.70172e+09	1.70448e+09	1.60081e+09	1.73474e+09	1.82059e+09	1.90518e+09	2.07471e+09	1.9184e+09	2.275e+09	1.79469e+09	1.92554e+09	1.97116e+09	1.94952e+09	2.07326e+09
Fiji	Gross Domestic Product (GDP)	2.66693e+09	2.72027e+09	2.80732e+09	2.83539e+09	2.98566e+09	3.00656e+09	3.06226e+09	3.09007e+09	3.05948e+09	3.0197e+09	3.01366e+09	3.07394e+09	3.12005e+09	3.26494e+09	1.44897e+08
Fiji	Agriculture, hunting, forestry, fishing (ISIC A-B)	3.60307e+08	3.39913e+08	3.56323e+08	3.41476e+08	3.57104e+08	3.60149e+08	3.7789e+08	3.59558e+08	3.77299e+08	3.46538e+08	3.37121e+08	3.64743e+08	3.77716e+08	3.87415e+08
Fiji	Mining, Manufacturing, Utilities (ISIC C-E)	3.58781e+08	4.01455e+08	4.05092e+08	4.03068e+08	4.51172e+08	4.09233e+08	4.06081e+08	3.93552e+08	3.80389e+08	3.88228e+08	4.13202e+08	4.24157e+08	4.26376e+08	4.37915e+08
Fiji	Manufacturing (ISIC D)	3.40554e+08	3.83124e+08	3.85678e+08	3.82272e+08	4.30801e+08	3.64289e+08	3.89718e+08	3.66063e+08	3.58966e+08	3.54075e+08	3.70906e+08	3.79531e+08	3.81214e+08	3.93248e+08
Fiji	Construction (ISIC F)	5.94367e+07	5.51572e+07	5.99122e+07	6.51426e+07	6.75201e+07	8.16101e+07	7.92446e+07	7.09653e+07	7.45136e+07	7.13536e+07	7.64503e+07	7.51252e+07	7.85661e+07	9.27503e+07
Fiji	Wholesale, retail trade, restaurants and hotels (ISIC G-H)	3.27034e+08	3.47548e+08	3.42311e+08	3.52792e+08	4.01273e+08	4.32888e+08	4.03911e+08	4.3348e+08	4.38802e+08	4.1409e+08	4.27112e+08	4.34906e+08	4.40489e+08	4.5316e+08
Fiji	Transport, storage and communication (ISIC I)	3.40948e+08	3.32312e+08	3.60574e+08	3.71747e+08	3.68959e+08	3.83213e+08	3.94449e+08	3.90309e+08	3.70202e+08	3.95815e+08	4.21766e+08	4.37782e+08	4.61163e+08	4.95785e+08
Fiji	Other Activities (ISIC J-P)	8.64222e+08	8.90209e+08	8.92963e+08	8.6032e+08	8.75343e+08	8.93572e+08	9.34911e+08	9.43025e+08	9.75111e+08	9.67372e+08	9.82576e+08	9.97399e+08	1.00449e+09	1.05319e+09
Fiji	Total Value Added	2.2983e+09	2.36493e+09	2.40857e+09	2.38672e+09	2.52326e+09	2.56067e+09	2.5889e+09	2.58798e+09	2.61503e+09	2.57855e+09	2.6545e+09	2.7263e+09	2.77647e+09	2.905e+09
Finland	Final consumption expenditure	1.26535e+11	1.29921e+11	1.33263e+11	1.37685e+11	1.41747e+11	1.45769e+11	1.50409e+11	1.54695e+11	1.57737e+11	1.55398e+11	1.58686e+11	1.61924e+11	1.62357e+11	1.62239e+11
Finland	Household consumption expenditure (including Non-profit institutions serving households)	8.64924e+10	8.89718e+10	9.1313e+10	9.51903e+10	9.86348e+10	1.01821e+11	1.05968e+11	1.09676e+11	1.12001e+11	1.08948e+11	1.1229e+11	1.15586e+11	1.15712e+11	1.14906e+11
Finland	General government final consumption expenditure	4.00429e+10	4.0949e+10	4.19496e+10	4.24945e+10	4.31121e+10	4.39487e+10	4.44406e+10	4.50188e+10	4.5736e+10	4.64502e+10	4.63962e+10	4.6338e+10	4.66453e+10	4.73334e+10
Finland	Gross capital formation	4.40266e+10	4.39464e+10	4.3051e+10	4.41801e+10	4.6633e+10	5.03855e+10	5.02584e+10	5.53233e+10	5.43304e+10	4.31712e+10	4.63535e+10	5.15352e+10	4.79865e+10	4.56618e+10
Finland	Gross fixed capital formation (including Acquisitions less disposals of valuables)	4.28844e+10	4.36287e+10	4.23364e+10	4.35185e+10	4.55407e+10	4.70266e+10	4.76255e+10	5.2366e+10	5.25074e+10	4.59265e+10	4.6425e+10	4.83253e+10	4.7113e+10	4.48414e+10
Finland	Changes in inventories	1.14223e+09	3.17703e+08	7.14589e+08	6.61643e+08	1.09223e+09	3.35895e+09	2.63294e+09	2.95732e+09	1.82301e+09	-2.75529e+09	-7.15042e+07	3.20993e+09	8.73512e+08	8.20472e+08
Finland	Exports of goods and services	6.82771e+10	6.91801e+10	7.17185e+10	7.08501e+10	7.69833e+10	8.22949e+10	9.06305e+10	9.88463e+10	1.05355e+11	8.41898e+10	8.93915e+10	9.11666e+10	9.22191e+10	9.06071e+10
Finland	Imports of goods and services	5.61883e+10	5.69653e+10	5.94104e+10	6.1851e+10	6.68761e+10	7.43558e+10	7.93298e+10	8.51996e+10	9.19522e+10	7.64555e+10	8.14249e+10	8.63384e+10	8.74377e+10	8.52437e+10
Finland	Gross Domestic Product (GDP)	1.79902e+11	1.84545e+11	1.87646e+11	1.91388e+11	1.98902e+11	2.04431e+11	2.12721e+11	2.2375e+11	2.25363e+11	2.06727e+11	2.12913e+11	2.18387e+11	2.15202e+11	2.12607e+11	-2.59451e+09
Finland	Agriculture, hunting, forestry, fishing (ISIC A-B)	4.75538e+09	4.66473e+09	4.66112e+09	4.50405e+09	4.46538e+09	4.66597e+09	4.76148e+09	5.0189e+09	5.00075e+09	5.37047e+09	5.39957e+09	5.63523e+09	5.28839e+09	5.29685e+09
Finland	Mining, Manufacturing, Utilities (ISIC C-E)	4.05637e+10	4.21743e+10	4.35239e+10	4.46891e+10	4.67853e+10	4.83933e+10	5.3375e+10	5.84727e+10	5.6958e+10	4.52908e+10	4.85497e+10	4.82735e+10	4.42086e+10	4.33208e+10
Finland	Manufacturing (ISIC D)	3.62261e+10	3.75368e+10	3.87844e+10	3.99004e+10	4.18532e+10	4.345e+10	4.8415e+10	5.32981e+10	5.19054e+10	3.98467e+10	4.2906e+10	4.28578e+10	3.78967e+10	3.71607e+10
Finland	Construction (ISIC F)	1.05262e+10	9.66236e+09	9.79792e+09	1.03585e+10	1.09685e+10	1.15107e+10	1.18634e+10	1.22953e+10	1.19783e+10	1.10306e+10	1.21172e+10	1.22586e+10	1.16877e+10	1.14142e+10
Finland	Wholesale, retail trade, restaurants and hotels (ISIC G-H)	1.87472e+10	2.04415e+10	2.08179e+10	2.12771e+10	2.24854e+10	2.29997e+10	2.29985e+10	2.57674e+10	2.64129e+10	2.40119e+10	2.49079e+10	2.5998e+10	2.66813e+10	2.63716e+10
Finland	Transport, storage and communication (ISIC I)	1.46756e+10	1.53514e+10	1.52583e+10	1.50034e+10	1.61981e+10	1.6523e+10	1.65839e+10	1.73352e+10	1.85623e+10	1.67756e+10	1.72185e+10	1.8135e+10	1.85653e+10	1.83252e+10
Finland	Other Activities (ISIC J-P)	7.05606e+10	7.15799e+10	7.19044e+10	7.206e+10	7.31784e+10	7.45138e+10	7.59045e+10	7.76623e+10	7.93127e+10	7.74846e+10	7.7531e+10	7.90401e+10	7.87751e+10	7.78712e+10
Finland	Total Value Added	1.59829e+11	1.63874e+11	1.65964e+11	1.67892e+11	1.74081e+11	1.78606e+11	1.85487e+11	1.96552e+11	1.98225e+11	1.79964e+11	1.85724e+11	1.8934e+11	1.85206e+11	1.826e+11
France	Final consumption expenditure	1.55849e+12	1.59134e+12	1.62314e+12	1.64962e+12	1.68354e+12	1.71968e+12	1.75331e+12	1.79355e+12	1.80514e+12	1.82054e+12	1.85097e+12	1.86281e+12	1.86722e+12	1.881e+12
France	Household consumption expenditure (including Non-profit institutions serving households)	1.09436e+12	1.12222e+12	1.14548e+12	1.1627e+12	1.18589e+12	1.21569e+12	1.24252e+12	1.27352e+12	1.27915e+12	1.28187e+12	1.30544e+12	1.31163e+12	1.30686e+12	1.30969e+12
France	General government final consumption expenditure	4.64127e+11	4.69129e+11	4.77659e+11	4.8692e+11	4.97648e+11	5.03986e+11	5.10786e+11	5.20037e+11	5.25984e+11	5.3867e+11	5.45526e+11	5.51171e+11	5.60369e+11	5.71316e+11
France	Gross capital formation	4.53784e+11	4.57158e+11	4.48186e+11	4.49756e+11	4.79455e+11	4.93076e+11	5.11996e+11	5.43327e+11	5.42532e+11	4.69299e+11	4.85079e+11	5.18957e+11	5.06725e+11	4.9782e+11
France	Gross fixed capital formation (including Acquisitions less disposals of valuables)	4.36353e+11	4.4628e+11	4.42185e+11	4.50672e+11	4.66355e+11	4.79876e+11	4.9737e+11	5.24898e+11	5.29376e+11	4.81363e+11	4.91381e+11	5.01533e+11	5.0286e+11	4.97884e+11
France	Changes in inventories	1.69832e+10	1.0994e+10	6.51011e+09	1.85615e+08	1.30776e+10	1.31996e+10	1.45488e+10	1.80993e+10	1.32723e+10	-9.97189e+09	-4.66286e+09	1.7125e+10	4.68852e+09	1.0741e+09
France	Exports of goods and services	5.14766e+11	5.29512e+11	5.39626e+11	5.33853e+11	5.61164e+11	5.8107e+11	6.1382e+11	6.31196e+11	6.33476e+11	5.62103e+11	6.12783e+11	6.54937e+11	6.61958e+11	6.76379e+11
France	Imports of goods and services	4.96522e+11	5.08299e+11	5.18152e+11	5.22769e+11	5.55134e+11	5.902e+11	6.23164e+11	6.58966e+11	6.67428e+11	6.04721e+11	6.58327e+11	6.99721e+11	6.90689e+11	7.02469e+11
France	Gross Domestic Product (GDP)	2.02998e+12	2.06967e+12	2.09281e+12	2.10996e+12	2.16876e+12	2.20363e+12	2.25596e+12	2.30923e+12	2.31375e+12	2.24568e+12	2.28983e+12	2.33744e+12	2.34526e+12	2.35194e+12	6.67811e+09
France	Agriculture, hunting, forestry, fishing (ISIC A-B)	3.73586e+10	3.62456e+10	3.8293e+10	3.2471e+10	3.93863e+10	3.70843e+10	3.71431e+10	3.68415e+10	3.84579e+10	4.08846e+10	3.95093e+10	4.10482e+10	3.76688e+10	3.71505e+10
France	Mining, Manufacturing, Utilities (ISIC C-E)	2.93589e+11	2.99122e+11	3.0174e+11	3.07565e+11	3.15027e+11	3.17272e+11	3.22723e+11	3.28878e+11	3.17033e+11	2.97869e+11	3.03626e+11	3.11936e+11	3.14652e+11	3.1351e+11
France	Manufacturing (ISIC D)	2.44507e+11	2.47661e+11	2.47301e+11	2.53291e+11	2.59114e+11	2.63497e+11	2.70568e+11	2.7629e+11	2.67501e+11	2.51961e+11	2.58137e+11	2.68306e+11	2.69572e+11	2.67441e+11
France	Construction (ISIC F)	1.00731e+11	1.04539e+11	1.04009e+11	1.03722e+11	1.05697e+11	1.08543e+11	1.1112e+11	1.16154e+11	1.14278e+11	1.07431e+11	1.04932e+11	1.02868e+11	1.01481e+11	9.93752e+10
France	Wholesale, retail trade, restaurants and hotels (ISIC G-H)	2.92107e+11	3.01901e+11	3.01656e+11	3.04462e+11	3.07942e+11	3.1048e+11	3.17832e+11	3.28359e+11	3.34888e+11	3.17325e+11	3.2686e+11	3.39642e+11	3.42091e+11	3.41999e+11
France	Transport, storage and communication (ISIC I)	1.26889e+11	1.32473e+11	1.42526e+11	1.44669e+11	1.5366e+11	1.5633e+11	1.65123e+11	1.71925e+11	1.75182e+11	1.66619e+11	1.71249e+11	1.77983e+11	1.79374e+11	1.79242e+11
France	Other Activities (ISIC J-P)	9.79087e+11	9.90995e+11	9.9553e+11	1.00408e+12	1.03042e+12	1.05029e+12	1.07343e+12	1.09535e+12	1.10686e+12	1.10002e+12	1.12015e+12	1.1379e+12	1.14973e+12	1.16058e+12
France	Total Value Added	1.82976e+12	1.86527e+12	1.88375e+12	1.89697e+12	1.95213e+12	1.98e+12	2.02737e+12	2.0775e+12	2.0867e+12	2.03014e+12	2.06633e+12	2.11139e+12	2.12499e+12	2.13186e+12
French Polynesia	Final consumption expenditure	4.14449e+09	4.51586e+09	4.97776e+09	5.28252e+09	4.98793e+09	5.30927e+09	5.38254e+09	5.61987e+09	5.66216e+09	5.68915e+09	5.63999e+09	5.69392e+09	5.71692e+09	5.68924e+09
French Polynesia	Household consumption expenditure (including Non-profit institutions serving households)	2.73723e+09	2.98285e+09	3.28569e+09	3.49041e+09	3.29581e+09	3.49731e+09	3.54294e+09	3.71117e+09	3.75421e+09	3.75264e+09	3.72569e+09	3.76047e+09	3.77436e+09	3.75723e+09
French Polynesia	General government final consumption expenditure	1.40726e+09	1.53301e+09	1.69207e+09	1.79211e+09	1.69211e+09	1.81197e+09	1.83959e+09	1.9087e+09	1.90795e+09	1.93651e+09	1.9143e+09	1.93345e+09	1.94256e+09	1.93201e+09
French Polynesia	Gross capital formation	1.09992e+09	1.17108e+09	1.39216e+09	1.34953e+09	1.43071e+09	1.41746e+09	1.2592e+09	1.34852e+09	1.41322e+09	1.16316e+09	1.25413e+09	1.26041e+09	1.23493e+09	1.2511e+09
French Polynesia	Gross fixed capital formation (including Acquisitions less disposals of valuables)	1.06707e+09	1.13677e+09	1.36493e+09	1.32633e+09	1.38026e+09	1.37003e+09	1.25359e+09	1.33321e+09	1.39272e+09	1.18424e+09	1.14422e+09	1.1692e+09	1.17466e+09	1.16383e+09
French Polynesia	Changes in inventories	3.28505e+07	3.43137e+07	2.72288e+07	2.31966e+07	5.04537e+07	4.74275e+07	5.60668e+06	1.53089e+07	2.04988e+07	-2.10824e+07	1.0991e+08	9.1208e+07	6.02672e+07	8.72727e+07
French Polynesia	Exports of goods and services	1.47856e+09	1.32261e+09	1.20627e+09	1.10178e+09	1.1373e+09	1.1668e+09	1.15305e+09	1.21162e+09	1.1607e+09	1.00388e+09	1.1281e+09	1.0981e+09	1.0846e+09	1.10476e+09
French Polynesia	Imports of goods and services	1.57587e+09	1.79113e+09	2.17941e+09	2.21854e+09	1.97185e+09	2.19075e+09	2.04127e+09	2.25894e+09	2.21844e+09	2.07707e+09	2.21341e+09	2.22163e+09	2.18674e+09	2.20951e+09
French Polynesia	Gross Domestic Product (GDP)	5.13653e+09	5.20876e+09	5.3193e+09	5.50272e+09	5.62378e+09	5.70278e+09	5.75351e+09	5.92107e+09	6.01763e+09	5.77912e+09	5.81176e+09	5.83476e+09	5.85203e+09	5.83867e+09	-1.33551e+07
French Polynesia	Agriculture, hunting, forestry, fishing (ISIC A-B)	2.33152e+08	2.01337e+08	2.03637e+08	1.73915e+08	1.78075e+08	1.74484e+08	1.64188e+08	1.70441e+08	1.67711e+08	1.38447e+08	1.38104e+08	1.39215e+08	1.39344e+08	1.39167e+08
French Polynesia	Mining, Manufacturing, Utilities (ISIC C-E)	4.15941e+08	4.22605e+08	4.47887e+08	4.34221e+08	4.32457e+08	4.07089e+08	3.62266e+08	3.88434e+08	4.08527e+08	4.11038e+08	3.99258e+08	4.07917e+08	4.05574e+08	4.0642e+08
French Polynesia	Manufacturing (ISIC D)	2.96572e+08	3.01327e+08	3.19346e+08	3.09616e+08	3.0833e+08	2.90297e+08	2.51394e+08	2.74373e+08	2.90245e+08	2.73508e+08	2.73759e+08	2.75492e+08	2.75981e+08	2.75514e+08
French Polynesia	Construction (ISIC F)	2.22304e+08	2.25407e+08	2.12474e+08	2.34283e+08	2.34605e+08	2.41692e+08	2.34928e+08	2.45579e+08	2.73029e+08	2.33188e+08	2.38993e+08	2.37686e+08	2.39519e+08	2.38409e+08
French Polynesia	Wholesale, retail trade, restaurants and hotels (ISIC G-H)	6.97134e+08	7.12636e+08	7.43063e+08	7.70376e+08	7.95527e+08	8.04204e+08	8.21118e+08	8.42356e+08	8.85417e+08	7.48377e+08	8.13815e+08	7.86308e+08	8.04045e+08	7.94523e+08
French Polynesia	Transport, storage and communication (ISIC I)	4.42081e+08	4.52629e+08	4.70458e+08	4.90858e+08	5.0048e+08	5.18941e+08	5.31467e+08	5.57604e+08	5.27684e+08	5.01193e+08	5.23921e+08	5.16006e+08	5.22542e+08	5.18851e+08
French Polynesia	Other Activities (ISIC J-P)	2.5664e+09	2.62474e+09	2.73414e+09	2.84019e+09	2.92148e+09	2.97656e+09	3.07508e+09	3.10212e+09	3.14391e+09	3.21545e+09	3.16099e+09	3.20995e+09	3.20118e+09	3.20299e+09
French Polynesia	Total Value Added	4.57701e+09	4.63936e+09	4.81166e+09	4.94384e+09	5.06262e+09	5.12297e+09	5.18904e+09	5.30653e+09	5.40628e+09	5.24769e+09	5.27509e+09	5.29709e+09	5.3122e+09	5.30036e+09
Gabon	Final consumption expenditure	3.6344e+09	3.72891e+09	3.81822e+09	3.84138e+09	3.90606e+09	4.07755e+09	4.38824e+09	4.58452e+09	4.75805e+09	4.62763e+09	4.89437e+09	5.2384e+09	5.74389e+09	6.12036e+09
Gabon	Household consumption expenditure (including Non-profit institutions serving households)	2.55148e+09	2.6057e+09	2.66595e+09	2.67555e+09	2.73406e+09	2.8768e+09	3.05454e+09	3.16391e+09	3.26775e+09	3.10286e+09	3.33586e+09	3.55322e+09	3.86576e+09	4.17815e+09
Gabon	General government final consumption expenditure	1.08151e+09	1.12228e+09	1.15146e+09	1.16482e+09	1.17136e+09	1.20075e+09	1.3325e+09	1.41856e+09	1.48771e+09	1.52007e+09	1.55511e+09	1.68105e+09	1.87272e+09	1.93815e+09
Gabon	Gross capital formation	1.86109e+09	2.06079e+09	2.46924e+09	2.08752e+09	1.97643e+09	2.0465e+09	2.22268e+09	2.49199e+09	2.67117e+09	2.49026e+09	2.64916e+09	2.94766e+09	3.37799e+09	3.88118e+09
Gabon	Gross fixed capital formation (including Acquisitions less disposals of valuables)	1.8418e+09	2.03943e+09	2.41219e+09	2.07735e+09	1.97617e+09	2.00981e+09	2.149e+09	2.35997e+09	2.60402e+09	2.47834e+09	2.83854e+09	2.98631e+09	3.38232e+09	3.85041e+09
Gabon	Changes in inventories	2.02278e+07	2.23983e+07	5.61995e+07	1.19932e+07	2.6136e+06	3.66904e+07	7.14204e+07	1.262e+08	6.58649e+07	1.40957e+07	-1.73569e+08	-3.25442e+07		3.33539e+07
Gabon	Exports of goods and services	5.86772e+09	5.52823e+09	5.1379e+09	5.51278e+09	5.65997e+09	5.74821e+09	5.31808e+09	5.51511e+09	5.16485e+09	4.52982e+09	4.89673e+09	5.31658e+09	5.05626e+09	5.02206e+09
Gabon	Imports of goods and services	2.08692e+09	2.095e+09	2.27866e+09	2.06461e+09	2.08128e+09	2.29329e+09	2.68721e+09	2.78424e+09	3.13248e+09	2.45586e+09	2.60418e+09	2.93108e+09	3.1652e+09	3.4382e+09
Gabon	Gross Domestic Product (GDP)	9.12486e+09	9.24317e+09	9.17192e+09	9.40061e+09	9.47529e+09	9.57897e+09	9.27977e+09	9.86738e+09	9.52652e+09	9.45278e+09	1.00999e+10	1.08156e+10	1.13844e+10	1.20202e+10	6.35768e+08
Gabon	Agriculture, hunting, forestry, fishing (ISIC A-B)	4.6816e+08	4.8213e+08	4.81806e+08	4.67946e+08	4.67085e+08	4.77477e+08	5.29782e+08	5.50812e+08	5.83504e+08	5.43876e+08	5.39932e+08	4.81983e+08	5.1188e+08	5.46013e+08
Gabon	Mining, Manufacturing, Utilities (ISIC C-E)	5.55747e+09	5.33939e+09	5.21598e+09	5.20466e+09	5.48043e+09	5.49689e+09	5.23709e+09	4.43462e+09	4.56187e+09	3.89043e+09	4.66428e+09	4.87998e+09	4.9406e+09	4.9295e+09
Gabon	Manufacturing (ISIC D)	2.94178e+08	3.1192e+08	3.80728e+08	4.41481e+08	4.12181e+08	4.33103e+08	4.68765e+08	4.66099e+08	5.38815e+08	5.19571e+08	5.42741e+08	5.96998e+08	6.13966e+08	6.53503e+08
Gabon	Construction (ISIC F)	1.52597e+08	1.85863e+08	2.37212e+08	2.85453e+08	2.40035e+08	2.43057e+08	2.63851e+08	2.75522e+08	2.93217e+08	3.40899e+08	3.06823e+08	3.7823e+08	6.35393e+08	6.20144e+08
Gabon	Wholesale, retail trade, restaurants and hotels (ISIC G-H)	5.27787e+08	5.46463e+08	5.38164e+08	4.97261e+08	5.02428e+08	5.21853e+08	5.59462e+08	6.06714e+08	6.45128e+08	6.56339e+08	4.15905e+08	4.2719e+08	4.41715e+08	4.75148e+08
Gabon	Transport, storage and communication (ISIC I)	5.19667e+08	5.36004e+08	4.8899e+08	4.53093e+08	4.33397e+08	4.69518e+08	4.83146e+08	5.63228e+08	5.93357e+08	6.23056e+08	5.7675e+08	6.07384e+08	6.49787e+08	7.21793e+08
Gabon	Other Activities (ISIC J-P)	5.18326e+08	7.95114e+08	1.79944e+09	1.9214e+09	1.95147e+09	1.95995e+09	1.99821e+09	2.2215e+09	2.34146e+09	2.55153e+09	2.35224e+09	2.46012e+09	2.66567e+09	2.9611e+09
Gabon	Total Value Added	7.32483e+09	7.58831e+09	8.76466e+09	8.85459e+09	9.06223e+09	9.16875e+09	9.13917e+09	8.93464e+09	9.33423e+09	9.08673e+09	9.11691e+09	9.49438e+09	1.01749e+10	1.06976e+10
Gambia	Final consumption expenditure	4.38808e+08	4.15515e+08	4.32066e+08	4.23993e+08	5.54546e+08	6.20165e+08	6.44745e+08	6.43805e+08	6.74026e+08	6.79996e+08	7.59889e+08	6.63865e+08	7.27108e+08	7.69761e+08
Gambia	Household consumption expenditure (including Non-profit institutions serving households)	3.79277e+08	3.51748e+08	3.78248e+08	3.69047e+08	5.03779e+08	5.7602e+08	6.04873e+08	5.96951e+08	6.08923e+08	6.05001e+08	6.83817e+08	5.90754e+08	6.69918e+08	7.10146e+08
Gambia	General government final consumption expenditure	5.9334e+07	6.3528e+07	5.36573e+07	5.47736e+07	5.06885e+07	4.41449e+07	3.99143e+07	4.68474e+07	6.49831e+07	7.481e+07	7.59183e+07	7.29303e+07	5.7152e+07	5.95811e+07
Gambia	Gross capital formation	1.02478e+08	1.49164e+08	1.25248e+08	2.73982e+08	2.10984e+08	1.83878e+08	1.99381e+08	1.99932e+08	1.86902e+08	2.01896e+08	1.418e+08	1.89272e+08	1.82765e+08	1.78585e+08
Gambia	Gross fixed capital formation (including Acquisitions less disposals of valuables)	1.02478e+08	1.49164e+08	1.25248e+08	2.73982e+08	1.88024e+08	1.83878e+08	1.99381e+08	1.99932e+08	1.86902e+08	2.01896e+08	1.418e+08	1.89272e+08	1.82765e+08	1.78585e+08
Gambia	Exports of goods and services	2.53346e+08	2.24616e+08	2.61296e+08	4.01187e+07	4.16751e+07	4.27402e+07	9.33972e+06	4.62064e+07	3.27804e+07	7.57176e+07	8.10352e+07	1.4125e+08	1.66647e+08	1.65279e+08
Gambia	Imports of goods and services	3.09803e+08	2.64369e+08	3.189e+08	1.81441e+08	2.2458e+08	2.22607e+08	2.22098e+08	2.35796e+08	2.01581e+08	2.20944e+08	2.00386e+08	2.44135e+08	2.81071e+08	2.73053e+08
Gambia	Gross Domestic Product (GDP)	5.30718e+08	5.61416e+08	5.63982e+08	5.76972e+08	6.30107e+08	6.24173e+08	6.31187e+08	6.54106e+08	6.91617e+08	7.36226e+08	7.84262e+08	7.50314e+08	7.96044e+08	8.40988e+08	4.4944e+07
Gambia	Agriculture, hunting, forestry, fishing (ISIC A-B)	1.524e+08	1.65557e+08	1.35619e+08	1.62013e+08	1.72849e+08	1.68938e+08	1.44319e+08	1.41706e+08	1.78572e+08	1.9952e+08	2.21842e+08	1.68126e+08	1.78289e+08	1.95576e+08
Gambia	Mining, Manufacturing, Utilities (ISIC C-E)	3.7576e+07	4.01981e+07	4.69931e+07	4.8037e+07	5.03546e+07	6.2245e+07	6.43637e+07	6.60394e+07	6.64592e+07	6.68519e+07	7.02865e+07	7.30818e+07	7.57539e+07	7.84223e+07
Gambia	Manufacturing (ISIC D)	3.08649e+07	3.13779e+07	3.28448e+07	3.33905e+07	3.52858e+07	4.14741e+07	4.31819e+07	4.48621e+07	4.11478e+07	3.93925e+07	3.95571e+07	4.11069e+07	4.21206e+07	4.16367e+07
Gambia	Construction (ISIC F)	3.13314e+07	3.24512e+07	3.37492e+07	3.47617e+07	3.5457e+07	2.56539e+07	2.6643e+07	2.42014e+07	2.63224e+07	2.7112e+07	2.81423e+07	3.07314e+07	3.46343e+07	3.96562e+07
Gambia	Wholesale, retail trade, restaurants and hotels (ISIC G-H)	2.04907e+08	2.07499e+08	2.13043e+08	1.95989e+08	1.7375e+08	1.66987e+08	1.84357e+08	2.05469e+08	1.94852e+08	1.93694e+08	1.89637e+08	1.94106e+08	2.02814e+08	2.0759e+08
Gambia	Transport, storage and communication (ISIC I)	3.88717e+07	4.82447e+07	6.5414e+07	6.69173e+07	7.05401e+07	7.3898e+07	7.91584e+07	8.61791e+07	8.29991e+07	8.96742e+07	9.98775e+07	1.05393e+08	1.17045e+08	1.24061e+08
Gambia	Other Activities (ISIC J-P)	8.15757e+07	8.35995e+07	8.72648e+07	8.87391e+07	9.02447e+07	9.26097e+07	9.9728e+07	9.42688e+07	1.04732e+08	1.24921e+08	1.2986e+08	1.40877e+08	1.46118e+08	1.51519e+08
Gambia	Total Value Added	5.47578e+08	5.78264e+08	5.83256e+08	5.97042e+08	5.93354e+08	5.90332e+08	5.99206e+08	6.18645e+08	6.54191e+08	7.01906e+08	7.39383e+08	7.13053e+08	7.5536e+08	7.97385e+08
Georgia	Final consumption expenditure	4.45855e+09	4.20412e+09	4.35899e+09	4.53534e+09	5.10519e+09	5.40315e+09	6.59659e+09	7.29277e+09	8.28014e+09	8.2254e+09	7.9049e+09	8.14409e+09	8.42475e+09	8.48895e+09
Georgia	Household consumption expenditure (including Non-profit institutions serving households)	4.0742e+09	3.74917e+09	3.8719e+09	3.99578e+09	4.28403e+09	4.29211e+09	5.52054e+09	5.56928e+09	6.19433e+09	6.32832e+09	6.16845e+09	6.53672e+09	6.76456e+09	6.87335e+09
Georgia	General government final consumption expenditure	3.84349e+08	4.54952e+08	4.87083e+08	5.39565e+08	8.21152e+08	1.11104e+09	1.07605e+09	1.72348e+09	2.08581e+09	1.89708e+09	1.73645e+09	1.60737e+09	1.66019e+09	1.6156e+09
Georgia	Gross capital formation	1.19649e+09	1.43072e+09	1.41814e+09	1.73077e+09	1.86655e+09	2.14685e+09	2.16394e+09	2.52528e+09	2.09229e+09	1.01026e+09	1.77884e+09	2.31026e+09	2.71486e+09	2.39991e+09
Georgia	Gross fixed capital formation (including Acquisitions less disposals of valuables)	1.14545e+09	1.28481e+09	1.21829e+09	1.47352e+09	1.60608e+09	1.79925e+09	1.79215e+09	2.026e+09	1.73181e+09	1.18813e+09	1.59266e+09	1.98604e+09	2.3283e+09	2.12569e+09
Georgia	Changes in inventories	5.1045e+07	1.45905e+08	1.99846e+08	2.57254e+08	2.60477e+08	3.47602e+08	3.71786e+08	4.9928e+08	3.60478e+08	-1.77872e+08	1.8618e+08	3.24218e+08	3.86558e+08	2.74224e+08
Georgia	Exports of goods and services	1.03504e+09	1.15397e+09	1.45437e+09	1.75933e+09	1.84594e+09	2.16358e+09	2.30471e+09	2.4583e+09	2.30678e+09	2.3065e+09	2.88021e+09	3.20086e+09	3.57768e+09	4.32394e+09
Georgia	Imports of goods and services	1.7855e+09	1.83363e+09	2.1097e+09	2.56527e+09	2.81855e+09	3.30597e+09	3.99832e+09	4.56519e+09	4.70734e+09	3.79518e+09	4.34814e+09	4.83754e+09	5.42021e+09	5.58161e+09
Georgia	Gross Domestic Product (GDP)	4.50121e+09	4.71751e+09	4.97574e+09	5.52596e+09	5.84976e+09	6.41094e+09	7.01254e+09	7.87773e+09	8.06003e+09	7.7557e+09	8.24066e+09	8.83181e+09	9.3778e+09	9.67658e+09	2.98778e+08
Georgia	Agriculture, hunting, forestry, fishing (ISIC A-B)	7.79494e+08	8.43529e+08	8.31353e+08	9.17346e+08	8.45217e+08	9.46874e+08	8.36053e+08	8.63356e+08	8.25125e+08	7.69093e+08	7.31945e+08	7.90503e+08	7.60985e+08	8.35573e+08
Georgia	Mining, Manufacturing, Utilities (ISIC C-E)	7.61766e+08	7.42556e+08	8.04964e+08	8.67045e+08	9.02113e+08	1.00574e+09	1.16652e+09	1.33659e+09	1.32347e+09	1.26943e+09	1.40325e+09	1.55325e+09	1.68037e+09	1.79878e+09
Georgia	Manufacturing (ISIC D)	5.28175e+08	5.22132e+08	5.9075e+08	6.37125e+08	6.82746e+08	7.75386e+08	9.02804e+08	1.04701e+09	1.02221e+09	9.55062e+08	1.07609e+09	1.20676e+09	1.32387e+09	1.42707e+09
Georgia	Construction (ISIC F)	1.44194e+08	1.59115e+08	2.27709e+08	3.33714e+08	4.53553e+08	5.17404e+08	5.61523e+08	6.43667e+08	5.72318e+08	5.54292e+08	5.90117e+08	6.32098e+08	7.17935e+08	6.42156e+08
Georgia	Wholesale, retail trade, restaurants and hotels (ISIC G-H)	5.9954e+08	6.77907e+08	7.09431e+08	7.98168e+08	8.55557e+08	9.48362e+08	1.11656e+09	1.22813e+09	1.35558e+09	1.1659e+09	1.32779e+09	1.40843e+09	1.52255e+09	1.60763e+09
Georgia	Transport, storage and communication (ISIC I)	5.81085e+08	5.8929e+08	6.40729e+08	6.94793e+08	7.35319e+08	7.96035e+08	9.24287e+08	1.02824e+09	9.82581e+08	9.78437e+08	1.09972e+09	1.1771e+09	1.2646e+09	1.31923e+09
Georgia	Other Activities (ISIC J-P)	1.02143e+09	1.05929e+09	1.10335e+09	1.21558e+09	1.31636e+09	1.53077e+09	1.76626e+09	2.02351e+09	2.11741e+09	2.11373e+09	2.29675e+09	2.57552e+09	2.797e+09	2.93345e+09
Georgia	Total Value Added	3.92858e+09	4.12986e+09	4.35679e+09	4.87291e+09	5.10982e+09	5.74519e+09	6.28146e+09	6.99303e+09	7.03221e+09	6.68392e+09	7.22623e+09	7.88536e+09	8.43905e+09	8.83243e+09
Germany	Final consumption expenditure	2.13288e+12	2.162e+12	2.15513e+12	2.15955e+12	2.16824e+12	2.17704e+12	2.20765e+12	2.2143e+12	2.24123e+12	2.25841e+12	2.27598e+12	2.31855e+12	2.33734e+12	2.35601e+12
Germany	Household consumption expenditure (including Non-profit institutions serving households)	1.61666e+12	1.64308e+12	1.62996e+12	1.63171e+12	1.6445e+12	1.65081e+12	1.67617e+12	1.67494e+12	1.68377e+12	1.68438e+12	1.69452e+12	1.73316e+12	1.7447e+12	1.75906e+12
Germany	General government final consumption expenditure	5.16231e+11	5.18907e+11	5.25188e+11	5.27863e+11	5.23734e+11	5.26235e+11	5.31469e+11	5.39379e+11	5.57525e+11	5.74159e+11	5.81604e+11	5.855e+11	5.9277e+11	5.97074e+11
Germany	Gross capital formation	6.27103e+11	6.05436e+11	5.54198e+11	5.57594e+11	5.41666e+11	5.35927e+11	5.82716e+11	6.25463e+11	6.29973e+11	5.21698e+11	5.85585e+11	6.28977e+11	5.8336e+11	5.84473e+11
Germany	Gross fixed capital formation (including Acquisitions less disposals of valuables)	5.99982e+11	5.85508e+11	5.51881e+11	5.44024e+11	5.43998e+11	5.45569e+11	5.84204e+11	6.09791e+11	6.17221e+11	5.57206e+11	5.84729e+11	6.27237e+11	6.23052e+11	6.18462e+11
Germany	Changes in inventories	4.50011e+10	3.42781e+10	8.03789e+09	2.45586e+10	1.11935e+09	-9.6416e+09	2.69954e+09	2.82073e+10	2.39654e+10	-4.76704e+10	6.1595e+09	7.81828e+09	-5.32849e+10	-4.49187e+10
Germany	Exports of goods and services	8.08894e+11	8.55063e+11	8.91415e+11	9.08397e+11	1.01241e+12	1.07981e+12	1.21248e+12	1.32538e+12	1.35112e+12	1.15835e+12	1.32671e+12	1.43298e+12	1.47331e+12	1.49653e+12
Germany	Imports of goods and services	7.88139e+11	7.94935e+11	7.74779e+11	8.19121e+11	8.8408e+11	9.35217e+11	1.03934e+12	1.10418e+12	1.12894e+12	1.02056e+12	1.15175e+12	1.2341e+12	1.23386e+12	1.27245e+12
Germany	Gross Domestic Product (GDP)	2.77736e+12	2.82445e+12	2.82475e+12	2.8044e+12	2.83751e+12	2.85756e+12	2.96357e+12	3.06048e+12	3.09268e+12	2.91831e+12	3.03769e+12	3.14675e+12	3.15859e+12	3.16194e+12	3.34141e+09
Germany	Agriculture, hunting, forestry, fishing (ISIC A-B)	2.1572e+10	2.08384e+10	2.05674e+10	2.10444e+10	2.78414e+10	2.01786e+10	1.90414e+10	2.38103e+10	2.8514e+10	2.76249e+10	2.10171e+10	1.81e+10	2.06829e+10	2.02857e+10
Germany	Mining, Manufacturing, Utilities (ISIC C-E)	6.22972e+11	6.26637e+11	6.1913e+11	6.22205e+11	6.48805e+11	6.56005e+11	6.92038e+11	7.24191e+11	7.13568e+11	6.02093e+11	6.95145e+11	7.35206e+11	7.44768e+11	7.46501e+11
Germany	Manufacturing (ISIC D)	5.44849e+11	5.52592e+11	5.41252e+11	5.46739e+11	5.67287e+11	5.76311e+11	6.24662e+11	6.51977e+11	6.37405e+11	5.14241e+11	6.09724e+11	6.64233e+11	6.61184e+11	6.62952e+11
Germany	Construction (ISIC F)	1.25903e+11	1.1812e+11	1.13552e+11	1.08266e+11	1.04957e+11	1.00587e+11	1.00285e+11	9.96402e+10	9.95048e+10	9.66434e+10	1.04052e+11	1.08204e+11	1.08308e+11	1.07975e+11
Germany	Wholesale, retail trade, restaurants and hotels (ISIC G-H)	2.77331e+11	2.9192e+11	2.93789e+11	3.02006e+11	3.04568e+11	3.10099e+11	3.35865e+11	3.40415e+11	3.38539e+11	3.17863e+11	3.08904e+11	3.22524e+11	3.12906e+11	3.13152e+11
Germany	Transport, storage and communication (ISIC I)	2.05749e+11	2.18008e+11	2.27204e+11	2.16342e+11	2.3222e+11	2.35301e+11	2.53854e+11	2.7721e+11	2.90786e+11	2.81529e+11	2.85791e+11	3.05314e+11	3.12762e+11	3.14401e+11
Germany	Other Activities (ISIC J-P)	1.24898e+12	1.27597e+12	1.27976e+12	1.26005e+12	1.25056e+12	1.26329e+12	1.2781e+12	1.31557e+12	1.34213e+12	1.31225e+12	1.33098e+12	1.35524e+12	1.35811e+12	1.35849e+12
Germany	Total Value Added	2.50918e+12	2.55579e+12	2.55641e+12	2.53298e+12	2.56952e+12	2.58546e+12	2.67748e+12	2.77645e+12	2.80671e+12	2.63088e+12	2.74058e+12	2.83813e+12	2.85007e+12	2.85312e+12
Ghana	Final consumption expenditure	1.32027e+10	1.24647e+10	1.38455e+10	1.45733e+10	1.58405e+10	1.67857e+10	1.68793e+10	1.75176e+10	1.94595e+10	1.95763e+10	2.1574e+10	2.55281e+10	2.76787e+10	2.5471e+10
Ghana	Household consumption expenditure (including Non-profit institutions serving households)	1.11704e+10	1.03847e+10	1.20102e+10	1.24899e+10	1.40479e+10	1.50896e+10	1.47375e+10	1.54941e+10	1.71726e+10	1.68259e+10	1.84379e+10	2.08226e+10	2.2736e+10	2.09188e+10
Ghana	General government final consumption expenditure	2.02318e+09	2.06937e+09	1.82966e+09	2.07548e+09	1.79005e+09	1.69612e+09	1.99069e+09	2.02021e+09	2.2827e+09	2.7404e+09	3.12374e+09	4.6779e+09	4.9149e+09	4.5265e+09
Ghana	Gross capital formation	3.19274e+09	3.13068e+09	1.88069e+09	2.68556e+09	3.40896e+09	3.548e+09	3.94869e+09	4.67318e+09	6.07831e+09	5.00093e+09	6.19189e+09	8.97123e+09	1.06582e+10	1.06218e+10
Ghana	Gross fixed capital formation (including Acquisitions less disposals of valuables)	3.19281e+09	3.13074e+09	1.88074e+09	2.6856e+09	3.40895e+09	3.548e+09	3.94873e+09	4.67322e+09	6.07836e+09	4.77988e+09	5.94612e+09	8.18479e+09	9.89882e+09	9.95112e+09
Ghana	Exports of goods and services	6.80234e+09	4.39624e+09	4.09954e+09	4.3214e+09	3.64522e+09	3.93303e+09	5.11406e+09	6.04317e+09	7.05496e+09	7.94187e+09	9.46061e+09	1.23118e+10	1.34797e+10	1.73376e+10
Ghana	Imports of goods and services	9.05226e+09	5.55103e+09	4.79074e+09	5.7403e+09	6.30325e+09	6.64169e+09	7.23866e+09	8.80795e+09	1.09775e+10	9.42532e+09	1.16126e+10	1.71547e+10	1.98607e+10	1.96531e+10
Ghana	Gross Domestic Product (GDP)	1.33355e+10	1.39408e+10	1.4609e+10	1.53722e+10	1.61951e+10	1.71985e+10	1.79813e+10	1.91429e+10	2.07567e+10	2.17235e+10	2.33136e+10	2.68122e+10	2.91686e+10	3.12495e+10	2.08089e+09
Ghana	Agriculture, hunting, forestry, fishing (ISIC A-B)	4.08161e+09	4.24561e+09	4.43051e+09	4.69929e+09	5.0269e+09	5.23496e+09	5.47192e+09	5.37793e+09	5.77612e+09	6.19338e+09	6.52079e+09	6.57535e+09	6.72682e+09	7.07695e+09
Ghana	Mining, Manufacturing, Utilities (ISIC C-E)	1.94838e+09	2.00233e+09	2.09576e+09	2.19159e+09	2.28392e+09	2.42248e+09	2.62082e+09	2.61107e+09	2.71285e+09	2.75232e+09	3.02612e+09	4.67407e+09	5.15646e+09	5.47713e+09
Ghana	Manufacturing (ISIC D)	1.37231e+09	1.42309e+09	1.4914e+09	1.56001e+09	1.63177e+09	1.71336e+09	1.78532e+09	1.76361e+09	1.82887e+09	1.805e+09	1.94248e+09	2.19508e+09	2.31675e+09	2.33075e+09
Ghana	Construction (ISIC F)	6.71668e+08	7.03908e+08	7.39173e+08	7.84262e+08	8.36024e+08	9.19626e+08	9.95035e+08	1.22537e+09	1.70306e+09	1.86205e+09	1.90821e+09	2.29005e+09	2.60314e+09	2.82661e+09
Ghana	Wholesale, retail trade, restaurants and hotels (ISIC G-H)	1.39113e+09	1.46208e+09	1.5439e+09	1.62101e+09	1.71827e+09	1.8901e+09	2.03184e+09	2.11615e+09	2.31336e+09	2.3466e+09	2.5573e+09	2.87284e+09	2.92387e+09	3.01357e+09
Ghana	Transport, storage and communication (ISIC I)	1.91485e+09	2.02017e+09	2.13534e+09	2.25919e+09	2.37667e+09	2.56443e+09	2.74903e+09	2.97748e+09	3.16773e+09	3.30449e+09	3.66928e+09	3.89384e+09	4.80361e+09	5.38653e+09
Ghana	Other Activities (ISIC J-P)	2.72312e+09	2.85962e+09	2.98576e+09	3.11545e+09	3.25069e+09	3.42969e+09	3.64302e+09	3.97488e+09	4.31248e+09	4.68124e+09	5.11983e+09	5.52659e+09	6.04382e+09	6.58435e+09
Ghana	Total Value Added	1.27324e+10	1.32963e+10	1.39334e+10	1.46723e+10	1.54907e+10	1.64613e+10	1.75146e+10	1.83016e+10	2.00068e+10	2.11644e+10	2.28352e+10	2.58917e+10	2.83474e+10	3.04738e+10
Greece	Final consumption expenditure	1.75193e+11	1.8258e+11	1.90248e+11	1.98435e+11	2.06946e+11	2.16356e+11	2.23957e+11	2.32748e+11	2.36888e+11	2.35886e+11	2.20566e+11	1.99237e+11	1.85013e+11	1.79298e+11
Greece	Household consumption expenditure (including Non-profit institutions serving households)	1.35295e+11	1.40927e+11	1.47695e+11	1.53438e+11	1.60058e+11	1.67455e+11	1.72368e+11	1.7852e+11	1.83825e+11	1.81959e+11	1.68972e+11	1.51035e+11	1.39217e+11	1.36463e+11
Greece	General government final consumption expenditure	3.98985e+10	4.16532e+10	4.25532e+10	4.49968e+10	4.68886e+10	4.89007e+10	5.15891e+10	5.42279e+10	5.3063e+10	5.39272e+10	5.15943e+10	4.82011e+10	4.57955e+10	4.28349e+10
Greece	Gross capital formation	4.96903e+10	5.05244e+10	5.06691e+10	6.08389e+10	6.08366e+10	5.16888e+10	6.57564e+10	7.28921e+10	6.77741e+10	4.89806e+10	4.36039e+10	3.64341e+10	2.88517e+10	2.5297e+10
Greece	Gross fixed capital formation (including Acquisitions less disposals of valuables)	4.79821e+10	4.86631e+10	4.81434e+10	5.56829e+10	5.87274e+10	5.11578e+10	6.00444e+10	7.07189e+10	6.60256e+10	5.73107e+10	4.5317e+10	3.76858e+10	2.68837e+10	2.5649e+10
Greece	Changes in inventories	1.7082e+09	1.86129e+09	2.52562e+09	5.15607e+09	2.10914e+09	5.31015e+08	5.71196e+09	2.17318e+09	1.7485e+09	-8.3301e+09	-1.71305e+09	-1.25168e+09	1.96799e+09	-3.52062e+08
Greece	Exports of goods and services	4.65939e+10	4.68546e+10	4.34302e+10	4.31153e+10	5.10996e+10	5.28205e+10	5.55749e+10	6.14627e+10	6.36134e+10	5.18661e+10	5.42678e+10	5.42678e+10	5.48919e+10	5.60711e+10
Greece	Imports of goods and services	6.65413e+10	6.73212e+10	6.50173e+10	6.88088e+10	7.36919e+10	7.31993e+10	8.32205e+10	9.58017e+10	9.82519e+10	7.89612e+10	7.46288e+10	6.78815e+10	6.16948e+10	6.06805e+10
Greece	Gross Domestic Product (GDP)	2.04953e+11	2.12612e+11	2.19336e+11	2.33895e+11	2.45479e+11	2.47666e+11	2.62068e+11	2.71339e+11	2.70133e+11	2.58261e+11	2.44189e+11	2.22544e+11	2.07917e+11	2.01024e+11	-6.8935e+09
Greece	Agriculture, hunting, forestry, fishing (ISIC A-B)	1.16836e+10	1.15405e+10	1.11043e+10	1.01282e+10	1.08015e+10	1.06887e+10	9.24016e+09	7.99769e+09	7.92904e+09	8.5139e+09	8.92578e+09	8.36417e+09	8.27364e+09	7.63928e+09
Greece	Mining, Manufacturing, Utilities (ISIC C-E)	2.45757e+10	2.46656e+10	2.48918e+10	2.56525e+10	2.64653e+10	2.92556e+10	3.03252e+10	3.85537e+10	3.47436e+10	2.84996e+10	2.26707e+10	2.03276e+10	1.86349e+10	1.73708e+10
Greece	Manufacturing (ISIC D)	1.7762e+10	1.79937e+10	1.69706e+10	1.80148e+10	1.86713e+10	2.08974e+10	2.10409e+10	2.16161e+10	1.99173e+10	2.02149e+10	1.64273e+10	1.44532e+10	1.35528e+10	1.30702e+10
Greece	Construction (ISIC F)	1.12829e+10	1.40662e+10	1.11082e+10	1.26334e+10	1.40162e+10	1.35278e+10	2.00252e+10	1.68941e+10	1.48589e+10	1.19766e+10	1.1827e+10	9.40146e+09	6.96923e+09	5.65177e+09
Greece	Wholesale, retail trade, restaurants and hotels (ISIC G-H)	3.38064e+10	3.56331e+10	4.14906e+10	4.65154e+10	4.7394e+10	4.83837e+10	4.89087e+10	5.00784e+10	5.02087e+10	4.70148e+10	4.27843e+10	3.73337e+10	3.54913e+10	3.58538e+10
Greece	Transport, storage and communication (ISIC I)	1.00738e+10	1.13638e+10	1.24055e+10	1.41311e+10	1.69542e+10	1.75256e+10	1.84447e+10	2.0146e+10	2.14317e+10	1.88903e+10	1.75508e+10	1.54143e+10	1.44904e+10	1.47164e+10
Greece	Other Activities (ISIC J-P)	9.31324e+10	9.21423e+10	9.55263e+10	9.85229e+10	1.0216e+11	1.02857e+11	1.05467e+11	1.13325e+11	1.16115e+11	1.15217e+11	1.12861e+11	1.06248e+11	1.01491e+11	9.83087e+10
Greece	Total Value Added	1.84555e+11	1.89412e+11	1.96527e+11	2.07584e+11	2.17791e+11	2.22238e+11	2.32411e+11	2.46995e+11	2.45287e+11	2.30112e+11	2.1662e+11	1.97089e+11	1.8535e+11	1.79541e+11
Greenland	Final consumption expenditure	1.50682e+09	1.44491e+09	1.54525e+09	1.64001e+09	1.68804e+09	1.73539e+09	1.77141e+09	1.85162e+09	1.86596e+09	1.89681e+09	1.89681e+09	1.90983e+09	1.90755e+09	1.94057e+09
Greenland	Household consumption expenditure (including Non-profit institutions serving households)	7.29229e+08	6.53513e+08	7.24478e+08	7.769e+08	8.25759e+08	8.69114e+08	8.75618e+08	8.81621e+08	8.74951e+08	8.69114e+08	8.83622e+08	8.96962e+08	8.95294e+08	8.79277e+08
Greenland	General government final consumption expenditure	7.77596e+08	7.91397e+08	8.20771e+08	8.63111e+08	8.62277e+08	8.66279e+08	8.95795e+08	9.7e+08	9.9101e+08	1.0277e+09	1.01319e+09	1.00203e+09	1.00608e+09	1.04295e+09
Greenland	Gross capital formation	3.71463e+08	3.57896e+08	3.03466e+08	3.01489e+08	2.79811e+08	3.96538e+08	3.94203e+08	5.15432e+08	7.52554e+08	5.74129e+08	1.00568e+09	1.28096e+09	7.39598e+08	5.15099e+08
Greenland	Gross fixed capital formation (including Acquisitions less disposals of valuables)	3.71463e+08	3.57896e+08	3.03466e+08	3.1016e+08	2.93484e+08	4.09044e+08	3.93369e+08	5.37777e+08	7.36879e+08	5.74963e+08	1.00402e+09	1.32502e+09	7.8307e+08	1.02219e+09
Greenland	Changes in inventories				-8.67113e+06	-1.36737e+07	-1.25064e+07	833763	-2.23448e+07	1.56747e+07	-833763	1.66753e+06	-4.4056e+07	-4.34724e+07	-5.07088e+08
Greenland	Exports of goods and services	5.65411e+08	5.5375e+08	5.74605e+08	5.24604e+08	5.91138e+08	6.08147e+08	6.04811e+08	5.84968e+08	6.32326e+08	5.61122e+08	6.30992e+08	6.2047e+08	5.90004e+08	5.62857e+08
Greenland	Imports of goods and services	9.16292e+08	8.09767e+08	8.91554e+08	9.40151e+08	9.67999e+08	1.08989e+09	1.03153e+09	1.15393e+09	1.41556e+09	1.20946e+09	1.66469e+09	1.9013e+09	1.33309e+09	1.15123e+09
Greenland	Gross Domestic Product (GDP)	1.52741e+09	1.54679e+09	1.53177e+09	1.52595e+09	1.59099e+09	1.65035e+09	1.73906e+09	1.79809e+09	1.83528e+09	1.82261e+09	1.8688e+09	1.90998e+09	1.90406e+09	1.86729e+09	-3.67689e+07
Greenland	Agriculture, hunting, forestry, fishing (ISIC A-B)	1.52908e+08	1.55603e+08	1.5341e+08	1.51951e+08	1.62379e+08	1.63084e+08	1.60973e+08	1.48154e+08	1.41536e+08	1.28518e+08	1.34969e+08	1.44536e+08	1.62803e+08	1.52945e+08
Greenland	Mining, Manufacturing, Utilities (ISIC C-E)	1.31463e+08	1.33615e+08	1.33713e+08	1.28993e+08	1.38924e+08	1.48577e+08	1.44828e+08	1.44592e+08	1.40911e+08	1.18383e+08	1.13613e+08	1.40046e+08	1.41262e+08	1.38702e+08
Greenland	Manufacturing (ISIC D)	8.7298e+07	8.86292e+07	8.9158e+07	8.53899e+07	9.18507e+07	1.00552e+08	9.54216e+07	9.03499e+07	8.52345e+07	5.62542e+07	6.00025e+07	5.97791e+07	5.28868e+07	5.67543e+07
Greenland	Construction (ISIC F)	8.97829e+07	9.00381e+07	8.87729e+07	9.18313e+07	8.98825e+07	9.43819e+07	1.39822e+08	1.62727e+08	1.79853e+08	1.95054e+08	2.04706e+08	2.58902e+08	2.13066e+08	1.77125e+08
Greenland	Wholesale, retail trade, restaurants and hotels (ISIC G-H)	2.10191e+08	2.11748e+08	2.08807e+08	2.13062e+08	2.14373e+08	2.22114e+08	2.02307e+08	2.01749e+08	1.98307e+08	2.1826e+08	2.25046e+08	2.20453e+08	2.16795e+08	2.17666e+08
Greenland	Transport, storage and communication (ISIC I)	2.08917e+08	2.111e+08	2.091e+08	2.09593e+08	2.15685e+08	2.25449e+08	2.48968e+08	2.38666e+08	2.4804e+08	2.42495e+08	2.51923e+08	2.45291e+08	2.43997e+08	2.43605e+08
Greenland	Other Activities (ISIC J-P)	6.62284e+08	6.82565e+08	6.82925e+08	6.88074e+08	7.22176e+08	7.39047e+08	7.81779e+08	8.33875e+08	8.57037e+08	8.56884e+08	8.7781e+08	8.43923e+08	8.59722e+08	8.48429e+08
Greenland	Total Value Added	1.45555e+09	1.48467e+09	1.47673e+09	1.48351e+09	1.54342e+09	1.59265e+09	1.67868e+09	1.72976e+09	1.76568e+09	1.75959e+09	1.80807e+09	1.85315e+09	1.83764e+09	1.77847e+09
Grenada	Final consumption expenditure	4.25579e+08	4.67311e+08	5.12272e+08	5.43839e+08	5.22515e+08	6.20774e+08	6.59206e+08	6.6943e+08	7.04322e+08	6.58662e+08	6.85965e+08	7.05539e+08	7.14621e+08	7.09055e+08
Grenada	Household consumption expenditure (including Non-profit institutions serving households)	3.60262e+08	3.98925e+08	4.42443e+08	4.71717e+08	4.39547e+08	5.30052e+08	5.72124e+08	5.75313e+08	5.9708e+08	5.54446e+08	5.78583e+08	5.99368e+08	6.09012e+08	6.04905e+08
Grenada	General government final consumption expenditure	6.53175e+07	6.8386e+07	6.98294e+07	7.21221e+07	8.29675e+07	9.07222e+07	8.70819e+07	9.4117e+07	1.07242e+08	1.04216e+08	1.07382e+08	1.06172e+08	1.05609e+08	1.04149e+08
Grenada	Gross capital formation	2.11106e+08	1.65518e+08	1.56122e+08	2.11979e+08	2.1576e+08	3.21885e+08	2.37811e+08	2.50888e+08	2.22107e+08	1.59796e+08	1.46274e+08	1.33316e+08	1.07225e+08	1.23869e+08
Grenada	Gross fixed capital formation (including Acquisitions less disposals of valuables)	2.11106e+08	1.65518e+08	1.56122e+08	2.11979e+08	2.1576e+08	3.21885e+08	2.37811e+08	2.50888e+08	2.22107e+08	1.59796e+08	1.46274e+08	1.33316e+08	1.07225e+08	1.23869e+08
Grenada	Exports of goods and services	2.52476e+08	2.06707e+08	1.80331e+08	1.87701e+08	2.02614e+08	1.4887e+08	1.55086e+08	1.95684e+08	1.79932e+08	1.62054e+08	1.5829e+08	1.66602e+08	1.58694e+08	1.60346e+08
Grenada	Imports of goods and services	3.32169e+08	2.93816e+08	2.84259e+08	3.25626e+08	3.26993e+08	3.96159e+08	3.84492e+08	4.07513e+08	3.91152e+08	3.12603e+08	3.26021e+08	3.35879e+08	3.23184e+08	3.25707e+08
Grenada	Gross Domestic Product (GDP)	5.56992e+08	5.45721e+08	5.64466e+08	6.17893e+08	6.13896e+08	6.9537e+08	6.67611e+08	7.08489e+08	7.15209e+08	6.67908e+08	6.64508e+08	6.69579e+08	6.57355e+08	6.67562e+08	1.02062e+07
Grenada	Agriculture, hunting, forestry, fishing (ISIC A-B)	3.75629e+07	3.65802e+07	3.77059e+07	3.9917e+07	3.66663e+07	2.06185e+07	2.69144e+07	2.73545e+07	2.99982e+07	3.36357e+07	3.14393e+07	3.09406e+07	3.23523e+07	3.40097e+07
Grenada	Mining, Manufacturing, Utilities (ISIC C-E)	4.10477e+07	4.11241e+07	4.22869e+07	4.37332e+07	3.88941e+07	4.3163e+07	4.5514e+07	4.72024e+07	4.69157e+07	4.55363e+07	4.49533e+07	4.48163e+07	4.42557e+07	4.46443e+07
Grenada	Manufacturing (ISIC D)	1.92367e+07	1.94427e+07	2.06881e+07	2.02053e+07	1.69428e+07	2.01407e+07	1.96272e+07	1.99716e+07	1.89876e+07	1.79883e+07	1.86863e+07	1.86617e+07	1.86187e+07	1.8714e+07
Grenada	Construction (ISIC F)	5.3031e+07	4.41225e+07	4.50018e+07	5.60087e+07	6.06539e+07	1.15752e+08	7.83064e+07	7.40921e+07	6.88759e+07	4.71282e+07	4.66798e+07	4.11588e+07	3.37321e+07	3.87906e+07
Grenada	Wholesale, retail trade, restaurants and hotels (ISIC G-H)	7.39074e+07	7.12988e+07	7.47404e+07	7.29356e+07	6.84015e+07	6.63556e+07	8.14593e+07	8.40021e+07	8.4879e+07	7.19893e+07	6.82262e+07	7.17811e+07	7.36115e+07	7.6633e+07
Grenada	Transport, storage and communication (ISIC I)	7.21823e+07	6.92855e+07	6.93168e+07	8.04831e+07	8.34563e+07	9.68481e+07	8.34007e+07	9.34715e+07	9.16215e+07	8.26878e+07	7.94433e+07	7.69186e+07	7.44774e+07	7.46861e+07
Grenada	Other Activities (ISIC J-P)	2.11433e+08	2.22068e+08	2.31548e+08	2.48285e+08	2.54974e+08	2.64981e+08	2.677e+08	2.94657e+08	3.09638e+08	3.1596e+08	3.15111e+08	3.20906e+08	3.21339e+08	3.2401e+08
Grenada	Total Value Added	4.88013e+08	4.83098e+08	4.99033e+08	5.39938e+08	5.4131e+08	6.07719e+08	5.82174e+08	6.19375e+08	6.29998e+08	5.94606e+08	5.83601e+08	5.83945e+08	5.76891e+08	5.89798e+08
Guatemala	Final consumption expenditure	2.21263e+10	2.29999e+10	2.36888e+10	2.44732e+10	2.51613e+10	2.61781e+10	2.7429e+10	2.89817e+10	3.04268e+10	3.07711e+10	3.19792e+10	3.31699e+10	3.43122e+10	3.56696e+10
Guatemala	Household consumption expenditure (including Non-profit institutions serving households)	1.97823e+10	2.05299e+10	2.12212e+10	2.20418e+10	2.28918e+10	2.38711e+10	2.49902e+10	2.63409e+10	2.74861e+10	2.7408e+10	2.83537e+10	2.93945e+10	3.03162e+10	3.14807e+10
Guatemala	General government final consumption expenditure	2.34301e+09	2.4688e+09	2.4666e+09	2.43076e+09	2.2693e+09	2.30699e+09	2.43877e+09	2.6406e+09	2.94003e+09	3.36144e+09	3.62339e+09	3.77318e+09	3.99349e+09	4.18611e+09
Guatemala	Gross capital formation	4.58434e+09	4.87623e+09	5.29482e+09	5.24554e+09	5.42667e+09	5.37037e+09	5.97747e+09	6.42633e+09	5.22683e+09	4.29673e+09	4.61118e+09	5.39238e+09	5.48834e+09	5.42248e+09
Guatemala	Gross fixed capital formation (including Acquisitions less disposals of valuables)	4.48246e+09	4.56485e+09	4.98725e+09	4.83199e+09	4.77497e+09	4.98005e+09	5.76215e+09	6.04775e+09	5.6956e+09	4.9476e+09	4.84542e+09	5.18951e+09	5.37626e+09	5.47523e+09
Guatemala	Changes in inventories	1.16685e+08	3.14131e+08	3.12509e+08	4.11485e+08	6.35237e+08	3.90324e+08	2.29346e+08	3.84249e+08	-4.14452e+08	-5.89228e+08	-1.978e+08	2.14969e+08	1.30438e+08	-2.41465e+07
Guatemala	Exports of goods and services	6.69086e+09	6.42364e+09	6.46927e+09	6.43579e+09	6.96461e+09	6.81769e+09	7.1443e+09	7.81701e+09	7.80427e+09	7.59658e+09	8.06256e+09	8.30507e+09	8.45072e+09	8.89509e+09
Guatemala	Imports of goods and services	9.68422e+09	1.03534e+10	1.05591e+10	1.06158e+10	1.12191e+10	1.1155e+10	1.18746e+10	1.27335e+10	1.20017e+10	1.10654e+10	1.21714e+10	1.30236e+10	1.33872e+10	1.39744e+10
Guatemala	Gross Domestic Product (GDP)	2.34421e+10	2.39887e+10	2.49163e+10	2.55469e+10	2.63521e+10	2.72112e+10	2.86751e+10	3.04828e+10	3.1483e+10	3.16486e+10	3.25568e+10	3.39118e+10	3.49189e+10	3.62076e+10	1.28868e+09
Guatemala	Agriculture, hunting, forestry, fishing (ISIC A-B)	2.9018e+09	2.93539e+09	3.09257e+09	3.1702e+09	3.30179e+09	3.37202e+09	3.41423e+09	3.61495e+09	3.64696e+09	3.7857e+09	3.77624e+09	3.96597e+09	4.16187e+09	4.35885e+09
Guatemala	Mining, Manufacturing, Utilities (ISIC C-E)	5.44669e+09	5.48041e+09	5.59255e+09	5.73157e+09	5.97227e+09	6.11892e+09	6.36495e+09	6.60303e+09	6.719e+09	6.679e+09	6.91716e+09	7.18156e+09	7.38709e+09	7.66042e+09
Guatemala	Manufacturing (ISIC D)	4.51128e+09	4.56124e+09	4.61326e+09	4.72872e+09	4.96012e+09	5.08928e+09	5.28051e+09	5.44119e+09	5.55051e+09	5.49991e+09	5.68402e+09	5.85634e+09	6.04818e+09	6.25799e+09
Guatemala	Construction (ISIC F)	1.06868e+09	1.19874e+09	1.38383e+09	1.33283e+09	1.2139e+09	1.26825e+09	1.43432e+09	1.56076e+09	1.55338e+09	1.3862e+09	1.22656e+09	1.25591e+09	1.26557e+09	1.28682e+09
Guatemala	Wholesale, retail trade, restaurants and hotels (ISIC G-H)	4.62745e+09	4.75114e+09	4.85597e+09	4.99177e+09	5.1499e+09	5.30623e+09	5.51975e+09	5.75418e+09	5.90264e+09	5.79864e+09	6.00893e+09	6.23145e+09	6.41752e+09	6.78011e+09
Guatemala	Transport, storage and communication (ISIC I)	1.01306e+09	1.08155e+09	1.16604e+09	1.28287e+09	1.48076e+09	1.64881e+09	1.9547e+09	2.40115e+09	2.75053e+09	2.82062e+09	2.9012e+09	3.04016e+09	3.13349e+09	3.22198e+09
Guatemala	Other Activities (ISIC J-P)	7.09127e+09	7.20335e+09	7.48742e+09	7.6725e+09	7.83765e+09	8.10843e+09	8.57e+09	9.07715e+09	9.5804e+09	1.00225e+10	1.04919e+10	1.09312e+10	1.1424e+10	1.19333e+10
Guatemala	Total Value Added	2.20792e+10	2.25566e+10	2.34737e+10	2.41063e+10	2.49423e+10	2.58227e+10	2.72654e+10	2.90783e+10	3.02805e+10	3.07107e+10	3.15732e+10	3.28835e+10	3.40959e+10	3.55528e+10
Guinea	Final consumption expenditure	2.1682e+09	2.1998e+09	2.27823e+09	2.15989e+09	2.2259e+09	2.19988e+09	2.27034e+09	2.30817e+09	2.41957e+09	2.31606e+09	2.40874e+09	2.76331e+09	2.95144e+09	3.11585e+09
Guinea	Household consumption expenditure (including Non-profit institutions serving households)	1.9897e+09	2.0275e+09	2.0498e+09	1.88992e+09	1.95418e+09	1.92095e+09	1.99052e+09	2.02279e+09	2.12069e+09	2.00212e+09	2.09908e+09	2.5084e+09	2.63633e+09	2.76815e+09
Guinea	General government final consumption expenditure	2.04289e+08	2.00816e+08	2.44594e+08	2.71011e+08	2.74534e+08	2.78926e+08	2.81973e+08	2.87325e+08	3.00992e+08	3.08517e+08	3.08517e+08	2.80442e+08	3.30921e+08	3.60373e+08
Guinea	Gross capital formation	4.33187e+08	4.16293e+08	5.38683e+08	5.90935e+08	7.02622e+08	8.26873e+08	8.80088e+08	1.02181e+09	1.22043e+09	1.05228e+09	1.17e+09	1.42842e+09	1.48984e+09	1.51964e+09
Guinea	Gross fixed capital formation (including Acquisitions less disposals of valuables)	4.05471e+08	3.89657e+08	5.04217e+08	5.53126e+08	6.57666e+08	8.10903e+08	8.57274e+08	8.44957e+08	1.05616e+09	8.9984e+08	1.00152e+09	1.33703e+09	1.39452e+09	1.42241e+09
Guinea	Changes in inventories						1.597e+07	1.44834e+07	-4.81975e+07	-3.72633e+07	-3.68011e+07	-4.04818e+07
Guinea	Exports of goods and services	8.14931e+08	8.88275e+08	8.94493e+08	9.49951e+08	9.11003e+08	9.42889e+08	1.08899e+09	1.08329e+09	1.14275e+09	1.10161e+09	1.23264e+09	1.54326e+09	1.54172e+09	1.43997e+09
Guinea	Imports of goods and services	9.04008e+08	8.85024e+08	9.43435e+08	8.71734e+08	9.5019e+08	1.03476e+09	1.28111e+09	1.3758e+09	1.62071e+09	1.25929e+09	1.59553e+09	2.37255e+09	2.60981e+09	2.70637e+09
Guinea	Gross Domestic Product (GDP)	2.5229e+09	2.61624e+09	2.75229e+09	2.78531e+09	2.84938e+09	2.93486e+09	2.96275e+09	3.01486e+09	3.16077e+09	3.15739e+09	3.2178e+09	3.34329e+09	3.47368e+09	3.56052e+09	8.6842e+07
Guinea	Agriculture, hunting, forestry, fishing (ISIC A-B)	5.48095e+08	5.80433e+08	6.04811e+08	6.2598e+08	6.46011e+08	6.54409e+08	6.64539e+08	6.37012e+08	5.56782e+08	5.87003e+08	6.01091e+08	6.28141e+08	6.5201e+08	6.93087e+08
Guinea	Mining, Manufacturing, Utilities (ISIC C-E)	6.12591e+08	6.37234e+08	6.60181e+08	6.66278e+08	6.76446e+08	6.94195e+08	6.52216e+08	7.07352e+08	7.32209e+08	7.74834e+08	8.45614e+08	8.82207e+08	8.85449e+08	8.42943e+08
Guinea	Manufacturing (ISIC D)	1.50137e+08	1.58395e+08	1.6774e+08	1.6103e+08	1.65861e+08	1.71666e+08	1.81322e+08	2.003e+08	2.39687e+08	1.90136e+08	1.99298e+08	2.08068e+08	2.17847e+08	2.23293e+08
Guinea	Construction (ISIC F)	1.86154e+08	2.00115e+08	2.16125e+08	2.13963e+08	2.26801e+08	2.40409e+08	2.55308e+08	2.73813e+08	3.06378e+08	2.37301e+08	2.19577e+08	2.30555e+08	2.50614e+08	2.72417e+08
Guinea	Wholesale, retail trade, restaurants and hotels (ISIC G-H)	4.57283e+08	4.66886e+08	4.83227e+08	4.88543e+08	4.93428e+08	5.0083e+08	5.11061e+08	4.98948e+08	6.00014e+08	6.00195e+08	5.28607e+08	5.56623e+08	5.81671e+08	5.96213e+08
Guinea	Transport, storage and communication (ISIC I)	1.59563e+08	1.62594e+08	1.66822e+08	1.6849e+08	1.70512e+08	1.73581e+08	1.8341e+08	1.83998e+08	2.38134e+08	2.33891e+08	2.3187e+08	2.43464e+08	2.55637e+08	2.64584e+08
Guinea	Other Activities (ISIC J-P)	3.90825e+08	4.02002e+08	4.13218e+08	4.22332e+08	4.26999e+08	4.25669e+08	4.43194e+08	4.85781e+08	5.24848e+08	5.377e+08	5.62948e+08	5.73404e+08	5.86418e+08	5.99029e+08
Guinea	Total Value Added	2.34279e+09	2.44253e+09	2.53777e+09	2.58432e+09	2.6421e+09	2.68909e+09	2.7098e+09	2.776e+09	2.88328e+09	2.9121e+09	2.95528e+09	3.07723e+09	3.17217e+09	3.23714e+09
Guinea-Bissau	Final consumption expenditure	5.39004e+08	5.77773e+08	5.70858e+08	5.42169e+08	6.01716e+08	6.02029e+08	6.44477e+08	6.56087e+08	7.01508e+08	7.04235e+08	7.4347e+08	7.5823e+08	7.4616e+08	7.62003e+08
Guinea-Bissau	Household consumption expenditure (including Non-profit institutions serving households)	4.47771e+08	4.89797e+08	4.88053e+08	4.47558e+08	5.22561e+08	5.14812e+08	5.57831e+08	5.64149e+08	6.24734e+08	6.01914e+08	6.34518e+08	6.37746e+08	6.16276e+08	6.62459e+08
Guinea-Bissau	General government final consumption expenditure	9.1233e+07	8.79753e+07	8.2805e+07	9.46105e+07	7.91555e+07	8.72166e+07	8.6646e+07	9.19373e+07	7.67743e+07	1.02321e+08	1.08952e+08	1.20484e+08	1.29884e+08	9.95445e+07
Guinea-Bissau	Gross capital formation	4.95266e+07	1.73196e+07	4.25257e+07	5.01319e+07	3.95967e+07	3.76667e+07	3.77691e+07	5.39483e+07	4.37676e+07	4.68028e+07	5.34421e+07	5.79124e+07	5.00385e+07	2.86152e+07
Guinea-Bissau	Gross fixed capital formation (including Acquisitions less disposals of valuables)	4.91931e+07	5.49697e+07	4.49453e+07	4.95537e+07	3.90033e+07	3.55434e+07	4.15305e+07	5.06059e+07	4.5252e+07	4.6126e+07	5.27482e+07	5.75821e+07	4.98366e+07	2.85117e+07
Guinea-Bissau	Changes in inventories	333528	-3.76501e+07	-2.4196e+06	578234	593401	2.12335e+06	-3.76136e+06	3.34238e+06	-1.48445e+06	676818	693881	330338	201857	103522
Guinea-Bissau	Exports of goods and services	9.69305e+07	1.03421e+08	8.28544e+07	7.5375e+07	8.26582e+07	9.47659e+07	8.48748e+07	1.39696e+08	1.46189e+08	1.60192e+08	1.63176e+08	2.17568e+08	1.52165e+08	1.86291e+08
Guinea-Bissau	Imports of goods and services	1.35079e+08	1.7102e+08	1.60779e+08	1.28474e+08	1.72778e+08	1.4767e+08	1.66777e+08	2.30147e+08	2.52025e+08	2.50061e+08	2.69524e+08	3.00445e+08	2.21772e+08	2.44377e+08
Guinea-Bissau	Gross Domestic Product (GDP)	5.33896e+08	5.44402e+08	5.37064e+08	5.39162e+08	5.51161e+08	5.86792e+08	6.00344e+08	6.19585e+08	6.3944e+08	6.61168e+08	6.90564e+08	7.27434e+08	7.1652e+08	7.18661e+08	2.14166e+06
Guinea-Bissau	Agriculture, hunting, forestry, fishing (ISIC A-B)	2.36853e+08	2.40443e+08	2.2361e+08	2.26969e+08	2.23335e+08	2.58962e+08	2.56012e+08	2.62338e+08	2.69855e+08	2.78157e+08	2.78769e+08	2.92708e+08	2.95928e+08	2.92672e+08
Guinea-Bissau	Mining, Manufacturing, Utilities (ISIC C-E)	7.69649e+07	7.61659e+07	7.46415e+07	7.28783e+07	7.00857e+07	7.65639e+07	7.75762e+07	7.0264e+07	7.70625e+07	7.7163e+07	7.82929e+07	8.21292e+07	8.56894e+07	8.69963e+07
Guinea-Bissau	Manufacturing (ISIC D)	7.39199e+07	7.31456e+07	7.16916e+07	6.99985e+07	6.72875e+07	7.35684e+07	7.49296e+07	6.78505e+07	7.40253e+07	7.39192e+07	7.48804e+07	7.85495e+07	8.19271e+07	8.34837e+07
Guinea-Bissau	Construction (ISIC F)	1.40856e+07	1.38026e+07	1.40122e+07	1.40122e+07	8.36449e+06	5.72546e+06	5.38611e+06	1.00215e+07	5.9378e+06	7.1265e+06	1.08954e+07	1.1985e+07	1.31835e+07	1.16674e+07
Guinea-Bissau	Wholesale, retail trade, restaurants and hotels (ISIC G-H)	1.10843e+08	1.13067e+08	1.09803e+08	1.1024e+08	1.22292e+08	1.11692e+08	1.22385e+08	1.34287e+08	1.41504e+08	1.34249e+08	1.34541e+08	1.42344e+08	1.47184e+08	1.61314e+08
Guinea-Bissau	Transport, storage and communication (ISIC I)	2.03258e+07	2.07281e+07	2.01072e+07	2.03083e+07	2.37664e+07	2.0879e+07	2.24905e+07	2.60319e+07	3.12493e+07	3.27432e+07	3.67946e+07	3.84872e+07	4.31057e+07	4.64248e+07
Guinea-Bissau	Other Activities (ISIC J-P)	1.11037e+08	1.09902e+08	8.81415e+07	8.48468e+07	8.71844e+07	9.37839e+07	9.30578e+07	9.60513e+07	9.42749e+07	1.0511e+08	1.19643e+08	1.26095e+08	1.26913e+08	1.24477e+08
Guinea-Bissau	Total Value Added	5.70109e+08	5.74107e+08	5.30316e+08	5.29255e+08	5.35028e+08	5.67606e+08	5.76907e+08	5.98994e+08	6.19884e+08	6.34548e+08	6.58936e+08	6.93749e+08	7.12003e+08	7.23552e+08
Guyana	Final consumption expenditure	1.00717e+09	1.08275e+09	1.02505e+09	1.01809e+09	1.11145e+09	1.42384e+09	1.33309e+09	1.53239e+09	1.64222e+09	1.53584e+09	1.66786e+09	1.8219e+09	1.86077e+09	2.05323e+09
Guyana	Household consumption expenditure (including Non-profit institutions serving households)	7.87913e+08	8.9656e+08	8.29079e+08	8.03654e+08	9.08256e+08	1.20183e+09	1.12333e+09	1.30808e+09	1.40922e+09	1.28369e+09	1.42185e+09	1.55687e+09	1.62355e+09	1.78429e+09
Guyana	General government final consumption expenditure	2.19258e+08	1.86188e+08	1.95975e+08	2.14439e+08	2.03197e+08	2.22008e+08	2.09755e+08	2.24302e+08	2.33e+08	2.52149e+08	2.46005e+08	2.6503e+08	2.37213e+08	2.68935e+08
Guyana	Gross capital formation	3.06642e+08	3.13569e+08	3.12988e+08	2.85369e+08	2.69512e+08	2.66716e+08	3.92276e+08	3.64989e+08	3.61407e+08	4.1536e+08	4.13373e+08	4.09707e+08	4.48073e+08	3.52094e+08
Guyana	Gross fixed capital formation (including Acquisitions less disposals of valuables)	3.06642e+08	3.13569e+08	3.12988e+08	2.85369e+08	2.69512e+08	2.66716e+08	3.92276e+08	3.64989e+08	3.61407e+08	4.1536e+08	4.13373e+08	4.09707e+08	4.48073e+08	3.52094e+08
Guyana	Exports of goods and services	5.0743e+08	5.39412e+08	7.63204e+08	7.46693e+08	8.14665e+08	7.06249e+08	7.28523e+08	7.13706e+08	7.88356e+08	7.1682e+08	8.15757e+08	9.45636e+08	1.05156e+09	9.79165e+08
Guyana	Imports of goods and services	6.53858e+08	6.68501e+08	8.658e+08	8.27239e+08	9.2584e+08	9.97028e+08	1.09806e+09	1.13117e+09	1.28267e+09	1.1089e+09	1.26926e+09	1.46162e+09	1.56243e+09	1.49122e+09
Guyana	Gross Domestic Product (GDP)	1.26988e+09	1.29845e+09	1.3121e+09	1.29891e+09	1.34169e+09	1.31544e+09	1.38292e+09	1.47972e+09	1.50932e+09	1.55912e+09	1.62772e+09	1.71562e+09	1.79797e+09	1.89326e+09	9.52925e+07
Guyana	Agriculture, hunting, forestry, fishing (ISIC A-B)	2.76943e+08	2.86424e+08	3.55448e+08	3.49393e+08	3.60435e+08	3.10968e+08	3.31413e+08	3.33275e+08	3.23501e+08	3.27619e+08	3.35296e+08	3.4419e+08	3.50191e+08	3.65054e+08
Guyana	Mining, Manufacturing, Utilities (ISIC C-E)	3.53743e+08	3.66142e+08	2.92229e+08	2.73434e+08	2.61044e+08	2.39167e+08	2.13987e+08	2.33273e+08	2.31257e+08	2.31679e+08	2.25258e+08	2.54349e+08	2.60077e+08	3.00576e+08
Guyana	Manufacturing (ISIC D)	1.44976e+08	1.48582e+08	8.12529e+07	7.96278e+07	7.96278e+07	8.91832e+07	9.36423e+07	9.6501e+07	9.22257e+07	9.61727e+07	9.64331e+07	1.03006e+08	1.06335e+08	1.13863e+08
Guyana	Construction (ISIC F)	9.12647e+07	9.30819e+07	8.93749e+07	9.45586e+07	9.8341e+07	1.07683e+08	1.20605e+08	1.29455e+08	1.32361e+08	1.33015e+08	1.47196e+08	1.51261e+08	1.60791e+08	1.64921e+08
Guyana	Wholesale, retail trade, restaurants and hotels (ISIC G-H)	1.18807e+08	1.19366e+08	1.18111e+08	1.15158e+08	1.17461e+08	1.3508e+08	1.48588e+08	1.61481e+08	1.68699e+08	1.85191e+08	2.05374e+08	2.14696e+08	2.28651e+08	2.2718e+08
Guyana	Transport, storage and communication (ISIC I)	1.08727e+08	1.14616e+08	1.1978e+08	1.25769e+08	1.30171e+08	1.42537e+08	1.56791e+08	1.82347e+08	1.96327e+08	1.98793e+08	2.12593e+08	2.29776e+08	2.44792e+08	2.70184e+08
Guyana	Other Activities (ISIC J-P)	2.53426e+08	2.5441e+08	2.53133e+08	2.5677e+08	2.60384e+08	2.72826e+08	2.86938e+08	3.01946e+08	3.16868e+08	3.34453e+08	3.50146e+08	3.62581e+08	3.71313e+08	3.92755e+08
Guyana	Total Value Added	1.22377e+09	1.25556e+09	1.23029e+09	1.2153e+09	1.22492e+09	1.20826e+09	1.25223e+09	1.3384e+09	1.36669e+09	1.40818e+09	1.47152e+09	1.55581e+09	1.61492e+09	1.72414e+09
Haiti	Final consumption expenditure	4.49665e+09	4.42507e+09	4.37031e+09	4.40504e+09	4.26699e+09	4.49132e+09	4.54565e+09	4.72013e+09	4.72822e+09	4.81067e+09	5.47237e+09	5.31984e+09	5.04416e+09	5.18306e+09
Haiti	Household consumption expenditure (including Non-profit institutions serving households)	4.25035e+09	4.16159e+09	4.07797e+09	4.1422e+09	4.04984e+09	4.17486e+09	4.3131e+09	4.53161e+09	4.43273e+09	4.48801e+09	5.18203e+09	5.03965e+09	4.69966e+09	4.81975e+09
Haiti	General government final consumption expenditure	2.57325e+08	2.7103e+08	2.94781e+08	2.70275e+08	2.30202e+08	3.16464e+08	2.4626e+08	2.11037e+08	3.01384e+08	3.25205e+08	3.05236e+08	2.94987e+08	3.46211e+08	3.63613e+08
Haiti	Gross capital formation	5.31667e+08	5.25044e+08	5.38412e+08	5.55092e+08	5.37309e+08	5.45035e+08	5.56932e+08	5.73979e+08	5.90046e+08	6.11018e+08	5.71159e+08	6.25858e+08	6.64369e+08	7.04597e+08
Haiti	Gross fixed capital formation (including Acquisitions less disposals of valuables)	5.31667e+08	5.25044e+08	5.38412e+08	5.55092e+08	5.37309e+08	5.45035e+08	5.56932e+08	5.73979e+08	5.90046e+08	6.11018e+08	5.71159e+08	6.25858e+08	6.64369e+08	7.04597e+08
Haiti	Exports of goods and services	5.16947e+08	5.05713e+08	4.95181e+08	5.33097e+08	5.46613e+08	5.82597e+08	6.2455e+08	6.06294e+08	6.88795e+08	8.42036e+08	8.85218e+08	1.06532e+09	1.08761e+09	1.14185e+09
Haiti	Imports of goods and services	1.66579e+09	1.63116e+09	1.61204e+09	1.66317e+09	1.63498e+09	1.7546e+09	1.7877e+09	1.83325e+09	1.8906e+09	2.00104e+09	2.41604e+09	2.41855e+09	2.28124e+09	2.35443e+09
Haiti	Gross Domestic Product (GDP)	3.91241e+09	3.87162e+09	3.86179e+09	3.87578e+09	3.73939e+09	3.8067e+09	3.89246e+09	4.0226e+09	4.05655e+09	4.18162e+09	3.95172e+09	4.17e+09	4.29031e+09	4.47465e+09	1.84334e+08
Haiti	Agriculture, hunting, forestry, fishing (ISIC A-B)	8.85818e+08	8.93838e+08	8.60464e+08	8.62534e+08	8.21141e+08	8.42355e+08	8.54255e+08	8.73917e+08	8.08464e+08	8.53738e+08	8.5322e+08	8.43907e+08	8.33041e+08	8.70813e+08
Haiti	Mining, Manufacturing, Utilities (ISIC C-E)	4.1227e+08	4.00889e+08	4.07237e+08	4.09759e+08	4.0358e+08	4.12894e+08	4.13008e+08	4.17198e+08	4.14996e+08	4.40551e+08	3.82917e+08	4.55492e+08	4.69705e+08	4.7879e+08
Haiti	Manufacturing (ISIC D)	3.75779e+08	3.76162e+08	3.82284e+08	3.83815e+08	3.74248e+08	3.80371e+08	3.89172e+08	3.94147e+08	3.93764e+08	4.11367e+08	3.48992e+08	4.10984e+08	4.40067e+08	4.49634e+08
Haiti	Construction (ISIC F)	7.96262e+08	8.01333e+08	8.08941e+08	8.24156e+08	8.02179e+08	8.25847e+08	8.49515e+08	8.71492e+08	9.17138e+08	9.49259e+08	9.88142e+08	1.07774e+09	1.13691e+09	1.24257e+09
Haiti	Wholesale, retail trade, restaurants and hotels (ISIC G-H)	7.15752e+08	7.1828e+08	7.39133e+08	7.43557e+08	6.96163e+08	7.05642e+08	7.26916e+08	7.7115e+08	8.14753e+08	8.24231e+08	7.58512e+08	7.93057e+08	8.32868e+08	8.73521e+08
Haiti	Transport, storage and communication (ISIC I)	3.80141e+08	3.88781e+08	3.87764e+08	3.93863e+08	3.96912e+08	4.09618e+08	4.27913e+08	4.62471e+08	4.91439e+08	5.04145e+08	4.89407e+08	5.54966e+08	5.47851e+08	5.67671e+08
Haiti	Other Activities (ISIC J-P)	5.93344e+08	5.8119e+08	5.83085e+08	5.77503e+08	5.63059e+08	5.71772e+08	5.81404e+08	6.03528e+08	6.30151e+08	6.31739e+08	6.24917e+08	6.42453e+08	6.62493e+08	6.81169e+08
Haiti	Total Value Added	3.84192e+09	3.82678e+09	3.81757e+09	3.82675e+09	3.6897e+09	3.76813e+09	3.84211e+09	3.97673e+09	4.02858e+09	4.13892e+09	4.05121e+09	4.24084e+09	4.35138e+09	4.5555e+09
Honduras	Final consumption expenditure	6.94973e+09	7.2858e+09	7.55765e+09	7.90375e+09	8.30215e+09	8.86489e+09	9.56452e+09	1.02471e+10	1.05768e+10	1.07072e+10	1.10087e+10	1.13187e+10	1.16277e+10	1.20107e+10
Honduras	Household consumption expenditure (including Non-profit institutions serving households)	5.80133e+09	6.06472e+09	6.31843e+09	6.59661e+09	6.92505e+09	7.35019e+09	7.98892e+09	8.47396e+09	8.72752e+09	8.73366e+09	9.05232e+09	9.37822e+09	9.66148e+09	9.96544e+09
Honduras	General government final consumption expenditure	1.14672e+09	1.22006e+09	1.23698e+09	1.30529e+09	1.37532e+09	1.5147e+09	1.57308e+09	1.77407e+09	1.85105e+09	1.97969e+09	1.95957e+09	1.94079e+09	1.96536e+09	2.04497e+09
Honduras	Gross capital formation	2.32492e+09	2.23422e+09	2.15275e+09	2.23602e+09	2.72647e+09	2.69509e+09	2.88954e+09	3.60213e+09	3.92282e+09	2.1873e+09	2.44995e+09	3.04097e+09	3.14376e+09	2.8557e+09
Honduras	Gross fixed capital formation (including Acquisitions less disposals of valuables)	2.09342e+09	2.03042e+09	1.88253e+09	1.99902e+09	2.46624e+09	2.4309e+09	2.75549e+09	3.42701e+09	3.64148e+09	2.3529e+09	2.38576e+09	2.78852e+09	2.90683e+09	2.88196e+09
Honduras	Changes in inventories	2.31987e+08	2.01745e+08	2.78214e+08	2.3941e+08	2.5928e+08	2.64188e+08	1.13892e+08	1.5107e+08	2.67394e+08	-2.16947e+08	4.04127e+07	2.46278e+08	2.27302e+08	-6.76356e+07
Honduras	Exports of goods and services	3.88382e+09	4.03764e+09	4.44183e+09	4.82951e+09	5.4671e+09	5.75721e+09	5.84665e+09	5.99498e+09	6.04653e+09	5.08531e+09	5.88293e+09	6.37486e+09	6.74383e+09	6.75781e+09
Honduras	Imports of goods and services	5.3071e+09	5.49732e+09	5.8218e+09	6.2809e+09	7.29629e+09	7.56012e+09	7.86675e+09	8.72318e+09	8.93087e+09	6.59017e+09	7.59217e+09	8.55379e+09	8.88209e+09	8.65705e+09
Honduras	Gross Domestic Product (GDP)	7.77252e+09	7.98418e+09	8.28393e+09	8.66061e+09	9.20037e+09	9.75707e+09	1.03978e+10	1.10413e+10	1.15085e+10	1.12286e+10	1.16476e+10	1.20943e+10	1.25616e+10	1.28836e+10	3.22053e+08
Honduras	Agriculture, hunting, forestry, fishing (ISIC A-B)	1.06337e+09	1.08593e+09	1.13482e+09	1.16148e+09	1.24536e+09	1.21679e+09	1.309e+09	1.38154e+09	1.40816e+09	1.38073e+09	1.40522e+09	1.49634e+09	1.64489e+09	1.71459e+09
Honduras	Mining, Manufacturing, Utilities (ISIC C-E)	1.60356e+09	1.64397e+09	1.73424e+09	1.81168e+09	1.88285e+09	2.06071e+09	2.18095e+09	2.31726e+09	2.39369e+09	2.23289e+09	2.31858e+09	2.41414e+09	2.46676e+09	2.51695e+09
Honduras	Manufacturing (ISIC D)	1.40465e+09	1.45871e+09	1.57195e+09	1.67274e+09	1.74025e+09	1.86202e+09	1.94665e+09	2.04436e+09	2.11363e+09	1.94138e+09	2.02916e+09	2.11849e+09	2.15849e+09	2.20653e+09
Honduras	Construction (ISIC F)	5.96531e+08	5.50071e+08	4.87017e+08	5.0532e+08	5.11442e+08	4.99534e+08	5.46489e+08	5.82393e+08	6.23565e+08	5.40726e+08	5.2788e+08	5.51159e+08	5.65394e+08	5.49783e+08
Honduras	Wholesale, retail trade, restaurants and hotels (ISIC G-H)	1.37209e+09	1.3883e+09	1.43387e+09	1.46388e+09	1.52469e+09	1.60768e+09	1.69598e+09	1.76088e+09	1.81615e+09	1.62582e+09	1.68037e+09	1.75116e+09	1.81432e+09	1.8544e+09
Honduras	Transport, storage and communication (ISIC I)	4.48417e+08	4.61614e+08	4.72539e+08	5.26983e+08	5.97981e+08	6.97105e+08	7.78316e+08	8.76965e+08	9.85095e+08	1.07194e+09	1.15154e+09	1.22764e+09	1.30038e+09	1.36256e+09
Honduras	Other Activities (ISIC J-P)	2.18915e+09	2.35311e+09	2.52955e+09	2.68853e+09	2.93439e+09	3.1979e+09	3.54659e+09	3.95624e+09	4.24616e+09	4.35523e+09	4.55767e+09	4.73068e+09	4.91843e+09	5.10627e+09
Honduras	Total Value Added	7.17816e+09	7.40352e+09	7.73243e+09	8.1111e+09	8.66453e+09	9.27972e+09	1.00637e+10	1.09007e+10	1.15142e+10	1.13093e+10	1.1767e+10	1.23107e+10	1.28629e+10	1.32767e+10
Hungary	Final consumption expenditure	6.83735e+10	7.12464e+10	7.64269e+10	8.20212e+10	8.36501e+10	8.60582e+10	8.73064e+10	8.62862e+10	8.63187e+10	8.251e+10	8.07751e+10	8.12482e+10	7.98386e+10	8.05768e+10
Hungary	Household consumption expenditure (including Non-profit institutions serving households)	4.77229e+10	4.98676e+10	5.38962e+10	5.83641e+10	5.94623e+10	6.11162e+10	6.20249e+10	6.26838e+10	6.19763e+10	5.78299e+10	5.62323e+10	5.67006e+10	5.5613e+10	5.55676e+10
Hungary	General government final consumption expenditure	2.06506e+10	2.13788e+10	2.25307e+10	2.36571e+10	2.41878e+10	2.49419e+10	2.52815e+10	2.36024e+10	2.43424e+10	2.46801e+10	2.45428e+10	2.45477e+10	2.42256e+10	2.50092e+10
Hungary	Gross capital formation	2.54135e+10	2.42808e+10	2.52287e+10	2.5471e+10	2.91118e+10	2.83907e+10	2.91272e+10	2.90427e+10	2.91688e+10	2.22142e+10	2.34128e+10	2.27134e+10	2.09777e+10	2.15484e+10
Hungary	Gross fixed capital formation (including Acquisitions less disposals of valuables)	2.14762e+10	2.20312e+10	2.37555e+10	2.40381e+10	2.58308e+10	2.67329e+10	2.69568e+10	2.81174e+10	2.84146e+10	2.60727e+10	2.35911e+10	2.30728e+10	2.21038e+10	2.32475e+10
Hungary	Changes in inventories	3.93733e+09	2.24963e+09	1.47315e+09	1.43286e+09	3.281e+09	1.65782e+09	2.1704e+09	9.25332e+08	7.54224e+08	-3.85856e+09	-1.78292e+08	-3.59435e+08	-1.12602e+09	-1.69909e+09
Hungary	Exports of goods and services	4.3378e+10	4.7215e+10	4.99327e+10	5.30701e+10	6.25969e+10	7.06619e+10	8.44698e+10	9.80811e+10	1.04852e+11	9.28916e+10	1.03409e+11	1.10196e+11	1.08579e+11	1.14939e+11
Hungary	Imports of goods and services	4.5955e+10	4.86265e+10	5.28551e+10	5.7882e+10	6.78936e+10	7.32207e+10	8.45792e+10	9.63395e+10	1.02147e+11	8.70985e+10	9.59367e+10	1.00208e+11	9.69465e+10	1.02629e+11
Hungary	Gross Domestic Product (GDP)	9.10429e+10	9.44435e+10	9.8685e+10	1.02414e+11	1.07319e+11	1.1189e+11	1.16324e+11	1.16919e+11	1.17946e+11	1.10219e+11	1.11089e+11	1.13096e+11	1.11425e+11	1.13124e+11	1.69941e+09
Hungary	Agriculture, hunting, forestry, fishing (ISIC A-B)	2.98461e+09	3.39661e+09	2.84905e+09	2.94374e+09	4.42017e+09	4.16383e+09	3.89282e+09	3.05043e+09	4.74098e+09	4.19612e+09	3.25024e+09	3.70534e+09	2.86915e+09	3.30194e+09
Hungary	Mining, Manufacturing, Utilities (ISIC C-E)	2.03885e+10	2.09191e+10	2.19737e+10	2.28199e+10	2.4056e+10	2.4922e+10	2.64356e+10	2.84147e+10	2.71699e+10	2.33099e+10	2.53306e+10	2.53767e+10	2.5065e+10	2.41823e+10
Hungary	Manufacturing (ISIC D)	1.58026e+10	1.65577e+10	1.76973e+10	1.90996e+10	2.0166e+10	2.13576e+10	2.27555e+10	2.45048e+10	2.36551e+10	1.95165e+10	2.1718e+10	2.18447e+10	2.17949e+10	2.08404e+10
Hungary	Construction (ISIC F)	4.08445e+09	4.39396e+09	4.91647e+09	4.85741e+09	4.83606e+09	5.29039e+09	5.11241e+09	4.80195e+09	4.33421e+09	4.17304e+09	3.75665e+09	3.86763e+09	3.6432e+09	3.88454e+09
Hungary	Wholesale, retail trade, restaurants and hotels (ISIC G-H)	9.47523e+09	9.46759e+09	1.01906e+10	1.05574e+10	1.07529e+10	1.15437e+10	1.26308e+10	1.25891e+10	1.26133e+10	1.04967e+10	1.03293e+10	1.06512e+10	1.0626e+10	1.12689e+10
Hungary	Transport, storage and communication (ISIC I)	7.34162e+09	8.19475e+09	8.78004e+09	9.09844e+09	9.51308e+09	1.00346e+10	1.05766e+10	1.12483e+10	1.10012e+10	1.09227e+10	1.1011e+10	1.12235e+10	1.13822e+10	1.1574e+10
Hungary	Other Activities (ISIC J-P)	3.54141e+10	3.57939e+10	3.70908e+10	3.84756e+10	3.88381e+10	4.02788e+10	4.14438e+10	4.04996e+10	4.09064e+10	4.07545e+10	4.07923e+10	4.16058e+10	4.16207e+10	4.28235e+10
Hungary	Total Value Added	7.96885e+10	8.21659e+10	8.58007e+10	8.87525e+10	9.24162e+10	9.62334e+10	1.00092e+11	1.00604e+11	1.00766e+11	9.38529e+10	9.44701e+10	9.64302e+10	9.52063e+10	9.70351e+10
Iceland	Final consumption expenditure	1.14437e+10	1.13321e+10	1.14585e+10	1.20571e+10	1.27647e+10	1.38568e+10	1.42645e+10	1.51621e+10	1.46172e+10	1.35367e+10	1.33854e+10	1.36266e+10	1.37602e+10	1.38694e+10
Iceland	Household consumption expenditure (including Non-profit institutions serving households)	8.11265e+09	7.8665e+09	7.80105e+09	8.3259e+09	8.94144e+09	9.89785e+09	1.01416e+10	1.08541e+10	1.01079e+10	9.10568e+09	9.0879e+09	9.31879e+09	9.50405e+09	9.57785e+09
Iceland	General government final consumption expenditure	3.3311e+09	3.4656e+09	3.65746e+09	3.73124e+09	3.82327e+09	3.95893e+09	4.12285e+09	4.30798e+09	4.5093e+09	4.43102e+09	4.2975e+09	4.30781e+09	4.25613e+09	4.2916e+09
Iceland	Gross capital formation	3.20269e+09	3.10186e+09	2.7069e+09	2.96944e+09	3.75612e+09	4.95258e+09	6.10575e+09	5.41977e+09	4.39504e+09	2.2993e+09	2.10269e+09	2.34738e+09	2.44868e+09	2.39384e+09
Iceland	Gross fixed capital formation (including Acquisitions less disposals of valuables)	3.22294e+09	3.12147e+09	2.72401e+09	2.98821e+09	3.77987e+09	4.98389e+09	6.14435e+09	5.45403e+09	4.42283e+09	2.31384e+09	2.11598e+09	2.36222e+09	2.46416e+09	2.40897e+09
Iceland	Exports of goods and services	3.96453e+09	4.23026e+09	4.37388e+09	4.41298e+09	4.77426e+09	5.1115e+09	4.86713e+09	6.02559e+09	6.19264e+09	6.70432e+09	6.82491e+09	7.05866e+09	7.33053e+09	7.83982e+09
Iceland	Imports of goods and services	5.01563e+09	4.51501e+09	4.39048e+09	4.83893e+09	5.50365e+09	7.09106e+09	7.77999e+09	7.59812e+09	6.06046e+09	4.70277e+09	4.90705e+09	5.23854e+09	5.49331e+09	5.51424e+09
Iceland	Gross Domestic Product (GDP)	1.36769e+10	1.41916e+10	1.42559e+10	1.46425e+10	1.58474e+10	1.67985e+10	1.75096e+10	1.92119e+10	1.94327e+10	1.84324e+10	1.78915e+10	1.8273e+10	1.84825e+10	1.91219e+10	6.39377e+08
Iceland	Agriculture, hunting, forestry, fishing (ISIC A-B)	7.88494e+08	7.99945e+08	8.19575e+08	7.93401e+08	8.23665e+08	8.1794e+08	7.94219e+08	7.83586e+08	7.82768e+08	8.08124e+08	7.40235e+08	7.68863e+08	7.98309e+08	8.39206e+08
Iceland	Mining, Manufacturing, Utilities (ISIC C-E)	1.85755e+09	1.95312e+09	1.95851e+09	1.97441e+09	2.1092e+09	2.05974e+09	2.15924e+09	2.22681e+09	2.47437e+09	2.45543e+09	2.47156e+09	2.54442e+09	2.60248e+09	2.62678e+09
Iceland	Manufacturing (ISIC D)	1.40473e+09	1.49807e+09	1.46947e+09	1.49055e+09	1.56884e+09	1.5056e+09	1.56281e+09	1.63809e+09	1.75101e+09	1.72693e+09	1.75252e+09	1.83683e+09	1.87899e+09	1.86845e+09
Iceland	Construction (ISIC F)	1.03686e+09	1.06456e+09	9.70714e+08	1.04763e+09	1.25685e+09	1.53837e+09	1.7399e+09	1.8522e+09	1.54914e+09	9.2764e+08	8.18415e+08	7.96878e+08	7.96878e+08	8.83027e+08
Iceland	Wholesale, retail trade, restaurants and hotels (ISIC G-H)	1.63921e+09	1.61706e+09	1.58175e+09	1.67942e+09	1.77856e+09	2.08775e+09	2.15741e+09	2.40605e+09	2.32337e+09	2.0971e+09	2.00106e+09	2.06443e+09	2.12392e+09	2.24491e+09
Iceland	Transport, storage and communication (ISIC I)	9.10836e+08	9.26272e+08	8.83384e+08	9.34324e+08	1.01021e+09	1.05744e+09	1.13786e+09	1.26314e+09	1.25466e+09	1.1829e+09	1.17241e+09	1.23172e+09	1.31894e+09	1.35804e+09
Iceland	Other Activities (ISIC J-P)	4.82181e+09	5.15928e+09	5.36148e+09	5.64635e+09	6.09343e+09	6.56518e+09	7.17688e+09	8.33509e+09	8.88456e+09	8.50799e+09	8.52323e+09	8.3816e+09	8.29362e+09	8.566e+09
Iceland	Total Value Added	1.10548e+10	1.15202e+10	1.15754e+10	1.20755e+10	1.30719e+10	1.41264e+10	1.51655e+10	1.68669e+10	1.72689e+10	1.59792e+10	1.57269e+10	1.57879e+10	1.59342e+10	1.6518e+10
India	Final consumption expenditure	4.47244e+11	4.71039e+11	4.82028e+11	5.07951e+11	5.32934e+11	5.79211e+11	6.24049e+11	6.82654e+11	7.35138e+11	7.96813e+11	8.61606e+11	9.38742e+11	9.87422e+11	1.03371e+12
India	Household consumption expenditure (including Non-profit institutions serving households)	3.70023e+11	3.9205e+11	4.03304e+11	4.27201e+11	4.49292e+11	4.88141e+11	5.29517e+11	5.79074e+11	6.20832e+11	6.66684e+11	7.23757e+11	7.91619e+11	8.31236e+11	8.71534e+11
India	General government final consumption expenditure	7.72683e+10	7.90228e+10	7.87444e+10	8.07554e+10	8.3641e+10	9.10701e+10	9.45081e+10	1.03554e+11	1.14298e+11	1.30162e+11	1.37865e+11	1.47119e+11	1.56192e+11	1.62175e+11
India	Gross capital formation	1.53193e+11	1.58583e+11	1.75202e+11	1.99954e+11	2.4686e+11	2.87092e+11	3.30972e+11	3.87907e+11	3.81521e+11	4.2981e+11	4.99309e+11	5.24863e+11	5.37215e+11	5.23695e+11
India	Gross fixed capital formation (including Acquisitions less disposals of valuables)	1.45149e+11	1.55327e+11	1.65463e+11	1.89938e+11	2.28181e+11	2.63421e+11	2.99803e+11	3.46944e+11	3.6171e+11	3.96466e+11	4.56037e+11	4.97661e+11	5.12485e+11	4.98548e+11
India	Changes in inventories	8.07498e+09	3.32106e+09	9.77013e+09	1.00587e+10	1.86899e+10	2.3671e+10	3.11434e+10	4.09035e+10	1.98885e+10	3.33577e+10	4.32581e+10	2.73087e+10	2.48593e+10	2.52655e+10
India	Exports of goods and services	7.27627e+10	7.58985e+10	9.19017e+10	1.00708e+11	1.28077e+11	1.61471e+11	1.94339e+11	2.05856e+11	2.35906e+11	2.24852e+11	2.69131e+11	3.10852e+11	3.26308e+11	3.53861e+11
India	Imports of goods and services	8.66525e+10	8.90657e+10	1.00015e+11	1.13834e+11	1.39123e+11	1.8446e+11	2.24082e+11	2.46923e+11	3.03008e+11	2.96535e+11	3.43428e+11	4.15015e+11	4.42204e+11	4.30932e+11
India	Gross Domestic Product (GDP)	5.98073e+11	6.29274e+11	6.52977e+11	7.07637e+11	7.66345e+11	8.37499e+11	9.15085e+11	1.00478e+12	1.04387e+12	1.13239e+12	1.25181e+12	1.33146e+12	1.39452e+12	1.46448e+12	6.99629e+10
India	Agriculture, hunting, forestry, fishing (ISIC A-B)	1.27915e+11	1.36264e+11	1.2627e+11	1.38621e+11	1.38873e+11	1.46064e+11	1.52147e+11	1.60978e+11	1.60992e+11	1.6245e+11	1.75506e+11	1.83333e+11	1.8593e+11	1.94694e+11
India	Mining, Manufacturing, Utilities (ISIC C-E)	1.16876e+11	1.20651e+11	1.26542e+11	1.34251e+11	1.4671e+11	1.60168e+11	1.80266e+11	1.972e+11	2.05236e+11	2.25663e+11	2.46059e+11	2.5376e+11	2.5606e+11	2.55687e+11
India	Manufacturing (ISIC D)	8.6748e+10	8.98439e+10	9.37899e+10	1.00221e+11	1.0993e+11	1.22039e+11	1.39069e+11	1.53199e+11	1.59834e+11	1.77595e+11	1.9528e+11	2.02454e+11	2.04772e+11	2.03309e+11
India	Construction (ISIC F)	3.71496e+10	3.86764e+10	4.17367e+10	4.67485e+10	5.43249e+10	6.12978e+10	6.76758e+10	7.50129e+10	7.89661e+10	8.42345e+10	9.29309e+10	9.79802e+10	9.90674e+10	1.00688e+11
India	Wholesale, retail trade, restaurants and hotels (ISIC G-H)	8.29507e+10	9.10191e+10	9.72139e+10	1.07e+11	1.15195e+11	1.29276e+11	1.43733e+11	1.58306e+11	1.67219e+11	1.80471e+11	2.01321e+11	2.10679e+11	2.20058e+11	2.26632e+11
India	Transport, storage and communication (ISIC I)	3.47321e+10	3.73445e+10	4.2551e+10	4.90757e+10	5.70269e+10	6.41444e+10	7.23437e+10	8.13213e+10	9.00084e+10	1.03228e+11	1.17523e+11	1.18912e+11	1.2617e+11	1.30042e+11
India	Other Activities (ISIC J-P)	1.57558e+11	1.6758e+11	1.76807e+11	1.86129e+11	2.00975e+11	2.2093e+11	2.40417e+11	2.63654e+11	2.94829e+11	3.25836e+11	3.51033e+11	3.73073e+11	4.05162e+11	4.45431e+11
India	Total Value Added	5.56256e+11	5.90734e+11	6.10083e+11	6.61522e+11	7.12907e+11	7.8188e+11	8.56791e+11	9.36947e+11	9.98541e+11	1.08398e+12	1.18676e+12	1.24022e+12	1.29566e+12	1.35703e+12
Indonesia	Final consumption expenditure	1.6659e+11	1.7306e+11	1.8127e+11	1.89518e+11	1.98723e+11	2.07175e+11	2.15273e+11	2.25762e+11	2.39181e+11	2.54022e+11	2.64542e+11	2.76485e+11	2.89654e+11	3.04809e+11
Indonesia	Household consumption expenditure (including Non-profit institutions serving households)	1.51028e+11	1.56305e+11	1.62301e+11	1.68619e+11	1.76995e+11	1.83992e+11	1.89831e+11	1.99335e+11	2.09972e+11	2.20174e+11	2.3061e+11	2.4147e+11	2.54216e+11	2.67648e+11
Indonesia	General government final consumption expenditure	1.56323e+10	1.68147e+10	1.89995e+10	2.09058e+10	2.174e+10	2.31825e+10	2.54105e+10	2.63999e+10	2.9153e+10	3.37227e+10	3.3832e+10	3.49213e+10	3.53675e+10	3.70907e+10
Indonesia	Gross capital formation	5.19123e+10	5.63579e+10	5.38443e+10	5.96806e+10	6.38006e+10	7.16999e+10	7.26632e+10	7.40691e+10	8.32831e+10	8.53027e+10	9.28122e+10	1.02181e+11	1.18875e+11	1.24646e+11
Indonesia	Gross fixed capital formation (including Acquisitions less disposals of valuables)	4.73806e+10	5.04567e+10	5.28254e+10	5.31425e+10	6.09456e+10	6.75808e+10	6.93358e+10	7.58006e+10	8.48103e+10	8.76035e+10	9.50334e+10	1.02961e+11	1.12936e+11	1.18255e+11
Indonesia	Changes in inventories	4.09135e+09	5.1441e+09	1.6085e+09	5.65424e+09	3.08536e+09	4.11908e+09	3.56817e+09	-2.98786e+07	2.66805e+08	-2.5387e+08	-7.42946e+07	1.11046e+09	6.19201e+09	6.60949e+09
Indonesia	Exports of goods and services	6.98846e+10	7.03353e+10	6.94794e+10	7.35692e+10	8.35219e+10	9.73876e+10	1.06547e+11	1.1565e+11	1.26675e+11	1.144e+11	1.31865e+11	1.49862e+11	1.52865e+11	1.60972e+11
Indonesia	Imports of goods and services	5.66014e+10	5.89672e+10	5.64614e+10	5.73443e+10	7.26285e+10	8.55338e+10	9.28749e+10	1.01293e+11	1.11425e+11	9.47366e+10	1.11168e+11	1.25993e+11	1.34382e+11	1.36007e+11
Indonesia	Gross Domestic Product (GDP)	2.26918e+11	2.35186e+11	2.45768e+11	2.57516e+11	2.70472e+11	2.85869e+11	3.01594e+11	3.2073e+11	3.40018e+11	3.55757e+11	3.77899e+11	4.02408e+11	4.27614e+11	4.52335e+11	2.47213e+10
Indonesia	Agriculture, hunting, forestry, fishing (ISIC A-B)	3.20487e+10	3.30923e+10	3.42335e+10	3.55304e+10	3.6532e+10	3.75249e+10	3.87844e+10	4.01303e+10	4.20682e+10	4.3734e+10	4.50475e+10	4.65639e+10	4.85212e+10	5.02373e+10
Indonesia	Mining, Manufacturing, Utilities (ISIC C-E)	9.4914e+10	9.727e+10	1.01251e+11	1.04719e+11	1.08309e+11	1.12942e+11	1.17338e+11	1.22153e+11	1.25934e+11	1.29622e+11	1.3515e+11	1.42421e+11	1.49276e+11	1.56201e+11
Indonesia	Manufacturing (ISIC D)	6.14601e+10	6.34885e+10	6.68458e+10	7.04109e+10	7.49052e+10	7.83494e+10	8.19419e+10	8.57648e+10	8.89015e+10	9.08175e+10	9.48864e+10	1.01018e+11	1.06821e+11	1.12761e+11
Indonesia	Construction (ISIC F)	1.48602e+10	1.55408e+10	1.63926e+10	1.73924e+10	1.86951e+10	2.01047e+10	2.17807e+10	2.36388e+10	2.54244e+10	2.7222e+10	2.91219e+10	3.08801e+10	3.31627e+10	3.53426e+10
Indonesia	Wholesale, retail trade, restaurants and hotels (ISIC G-H)	3.39943e+10	3.53355e+10	3.68437e+10	3.88505e+10	4.10657e+10	4.44752e+10	4.73323e+10	5.15607e+10	5.51018e+10	5.58206e+10	6.06728e+10	6.62572e+10	7.16547e+10	7.59026e+10
Indonesia	Transport, storage and communication (ISIC I)	1.1072e+10	1.19684e+10	1.29728e+10	1.45541e+10	1.65021e+10	1.86079e+10	2.12557e+10	2.42391e+10	2.82547e+10	3.26334e+10	3.70236e+10	4.10954e+10	4.51965e+10	4.98012e+10
Indonesia	Other Activities (ISIC J-P)	3.88368e+10	4.07384e+10	4.2842e+10	4.68853e+10	4.96721e+10	5.22144e+10	5.443e+10	5.83602e+10	6.28627e+10	6.58924e+10	6.95352e+10	7.42483e+10	7.8855e+10	8.40018e+10
Indonesia	Total Value Added	2.25933e+11	2.34165e+11	2.44701e+11	2.58115e+11	2.70859e+11	2.85869e+11	3.00756e+11	3.19846e+11	3.39367e+11	3.54314e+11	3.75807e+11	4.00662e+11	4.25758e+11	4.50372e+11
Iran (Islamic Republic of)	Final consumption expenditure	8.01649e+10	8.3627e+10	9.18726e+10	9.64783e+10	1.07038e+11	1.17125e+11	1.24242e+11	1.29422e+11	1.25335e+11	1.24592e+11	1.26228e+11	1.34439e+11	1.30989e+11	1.30178e+11
Iran (Islamic Republic of)	Household consumption expenditure (including Non-profit institutions serving households)	5.8012e+10	6.05863e+10	6.76761e+10	7.12512e+10	7.98372e+10	8.77872e+10	9.31138e+10	9.94487e+10	9.49925e+10	9.39229e+10	9.56879e+10	1.03029e+11	1.01262e+11	1.00233e+11
Iran (Islamic Republic of)	General government final consumption expenditure	2.33468e+10	2.42463e+10	2.48783e+10	2.5838e+10	2.74244e+10	2.93382e+10	3.11322e+10	2.85655e+10	2.97367e+10	3.03581e+10	2.99191e+10	3.01056e+10	2.79515e+10	2.8412e+10
Iran (Islamic Republic of)	Gross capital formation	5.04232e+10	5.35162e+10	5.54463e+10	6.45533e+10	6.48924e+10	6.21049e+10	6.56679e+10	7.9271e+10	9.08301e+10	9.75056e+10	1.08572e+11	1.00188e+11	8.78593e+10	7.79014e+10
Iran (Islamic Republic of)	Gross fixed capital formation (including Acquisitions less disposals of valuables)	3.06126e+10	3.49482e+10	3.97718e+10	4.46747e+10	4.87773e+10	5.30024e+10	5.45716e+10	5.81636e+10	6.44909e+10	6.39164e+10	6.83268e+10	6.90064e+10	5.25845e+10	4.89791e+10
Iran (Islamic Republic of)	Changes in inventories	-8.25894e+09	-5.66881e+09	-1.3837e+09	-3.6641e+09	1.1902e+09	9.10256e+09	7.77068e+09	-3.37222e+08	-3.10047e+09	-1.00242e+10	-1.47452e+10	-6.10221e+09	-1.53433e+10	-1.06377e+10
Iran (Islamic Republic of)	Exports of goods and services	5.42969e+10	5.32889e+10	5.77577e+10	6.50061e+10	6.49321e+10	6.83963e+10	7.38937e+10	7.27099e+10	7.24873e+10	7.71309e+10	8.58117e+10	9.10116e+10	7.89414e+10	8.28922e+10
Iran (Islamic Republic of)	Imports of goods and services	2.44654e+10	2.86941e+10	3.53672e+10	4.26437e+10	4.81557e+10	4.92233e+10	5.27279e+10	5.43721e+10	5.8613e+10	5.76753e+10	6.24204e+10	5.91146e+10	4.95932e+10	4.16627e+10
Iran (Islamic Republic of)	Gross Domestic Product (GDP)	1.55414e+11	1.59621e+11	1.72273e+11	1.85867e+11	1.95324e+11	2.05587e+11	2.18136e+11	2.3618e+11	2.40243e+11	2.4989e+11	2.6428e+11	2.70946e+11	2.53159e+11	2.48309e+11	-4.85013e+09
Iran (Islamic Republic of)	Agriculture, hunting, forestry, fishing (ISIC A-B)	1.47137e+10	1.44691e+10	1.63443e+10	1.72503e+10	1.72566e+10	1.87885e+10	1.95985e+10	2.09531e+10	1.84806e+10	2.09755e+10	2.28213e+10	2.39843e+10	2.18402e+10	2.16148e+10
Iran (Islamic Republic of)	Mining, Manufacturing, Utilities (ISIC C-E)	5.85884e+10	5.93332e+10	6.43244e+10	7.30261e+10	7.8886e+10	8.56881e+10	9.2985e+10	9.87715e+10	1.00072e+11	1.02321e+11	1.1007e+11	1.13299e+11	1.04986e+11	1.03409e+11
Iran (Islamic Republic of)	Manufacturing (ISIC D)	1.32654e+10	1.47711e+10	1.6428e+10	1.8572e+10	2.06093e+10	2.35133e+10	2.60931e+10	2.83064e+10	2.89737e+10	3.05038e+10	3.35631e+10	3.45521e+10	3.17792e+10	3.14568e+10
Iran (Islamic Republic of)	Construction (ISIC F)	5.49481e+09	5.82174e+09	6.89709e+09	7.03319e+09	7.0387e+09	7.29658e+09	7.42619e+09	8.58903e+09	1.00751e+10	9.57757e+09	1.02727e+10	1.04879e+10	9.7809e+09	9.61903e+09
Iran (Islamic Republic of)	Wholesale, retail trade, restaurants and hotels (ISIC G-H)	1.51574e+10	1.5755e+10	1.71336e+10	1.89045e+10	2.12001e+10	2.30887e+10	2.39286e+10	2.54263e+10	2.53451e+10	2.62944e+10	2.80965e+10	2.93393e+10	2.69886e+10	2.65861e+10
Iran (Islamic Republic of)	Transport, storage and communication (ISIC I)	1.06442e+10	1.12584e+10	1.21477e+10	1.33353e+10	1.48518e+10	1.64935e+10	1.92411e+10	2.2016e+10	2.55132e+10	2.67168e+10	2.79426e+10	2.91436e+10	2.70212e+10	2.64887e+10
Iran (Islamic Republic of)	Other Activities (ISIC J-P)	4.91797e+10	5.15365e+10	5.32898e+10	5.43839e+10	5.61665e+10	5.75337e+10	5.98259e+10	6.15715e+10	5.9674e+10	5.92537e+10	6.01546e+10	6.00023e+10	5.79052e+10	5.61015e+10
Iran (Islamic Republic of)	Total Value Added	1.52854e+11	1.5721e+11	1.69877e+11	1.83311e+11	1.94879e+11	2.08889e+11	2.22731e+11	2.37993e+11	2.40005e+11	2.47413e+11	2.62072e+11	2.69848e+11	2.51276e+11	2.46666e+11
Iraq	Final consumption expenditure	1.11364e+10	1.55007e+10	1.76467e+10	1.89026e+10	3.02567e+10	2.87205e+10	2.50811e+10	2.75102e+10	2.50161e+10	3.9535e+10	3.61278e+10	3.29842e+10	3.63957e+10	4.09054e+10
Iraq	Household consumption expenditure (including Non-profit institutions serving households)	5.94154e+09	8.61737e+09	9.82856e+09	1.49227e+10	1.78347e+10	1.87454e+10	1.76406e+10	1.85154e+10	1.63241e+10	2.81758e+10	2.53406e+10	2.23175e+10	2.29878e+10	2.65719e+10
Iraq	General government final consumption expenditure	5.19481e+09	6.88334e+09	7.8181e+09	3.97995e+09	1.2422e+10	9.97513e+09	7.44053e+09	8.99481e+09	8.69195e+09	1.13592e+10	1.07872e+10	1.06667e+10	1.34079e+10	1.43335e+10
Iraq	Gross capital formation	1.27898e+10	1.903e+10	7.38103e+09	3.45344e+09	8.22032e+09	1.10676e+10	8.97909e+09	4.48713e+09	7.92841e+09	6.09172e+09	9.04759e+09	9.71841e+09	1.06479e+10	1.13442e+10
Iraq	Gross fixed capital formation (including Acquisitions less disposals of valuables)	1.28043e+09	2.68528e+09	2.17079e+09	3.45344e+09	2.60856e+09	6917365625	8.39723e+09	3.24532e+09	7.72808e+09	5.56085e+09	9.23637e+09	8.13994e+09	1.14504e+10	1.21991e+10
Iraq	Changes in inventories	1.15094e+10	1.63447e+10	5.21023e+09	0	5.61176e+09	4.15027e+09	5.81853e+08	1.24181e+09	2.00333e+08	5.30867e+08	-1.88777e+08	1.57847e+09	-8.0246e+08	-8.54936e+08
Iraq	Exports of goods and services	3.32187e+10	2.86063e+10	2.85775e+10	2.50936e+10	2.73434e+10	2.71494e+10	2.42219e+10	2.20472e+10	2.6279e+10	2.1248e+10	2.24748e+10	2.78293e+10	3.06084e+10	2.86936e+10
Iraq	Imports of goods and services	2.17788e+10	2.69556e+10	1.99204e+10	2.4915e+10	3.10812e+10	3.06696e+10	1.833e+10	1.3542e+10	1.60443e+10	2.11871e+10	1.94322e+10	1.73888e+10	1.90395e+10	2.0831e+10
Iraq	Gross Domestic Product (GDP)	3.53661e+10	3.61814e+10	3.36848e+10	2.25347e+10	3.47392e+10	3.6268e+10	3.99521e+10	4.05025e+10	4.31793e+10	4.56875e+10	4.8218e+10	5.3143e+10	5.86125e+10	6.10814e+10	2.46886e+09
Iraq	Agriculture, hunting, forestry, fishing (ISIC A-B)	2.65803e+09	2.68989e+09	3.14666e+09	2.23005e+09	2.61911e+09	3.44032e+09	3.58878e+09	2.5949e+09	2.25258e+09	2.32886e+09	2.35377e+09	2.74532e+09	2.86215e+09	2.94336e+09
Iraq	Mining, Manufacturing, Utilities (ISIC C-E)	4.22138e+10	4.1941e+10	3.61472e+10	2.27776e+10	3.22631e+10	2.99515e+10	3.16139e+10	3.39849e+10	3.82001e+10	3.92586e+10	3.96911e+10	4.46891e+10	5.03697e+10	5.05318e+10
Iraq	Manufacturing (ISIC D)	1.20638e+09	1.31754e+09	1.20093e+09	8.58327e+08	6.66982e+08	6.59668e+08	7.28947e+08	7.74213e+08	8.05471e+08	1.09542e+09	1.16442e+09	1.41456e+09	1.48681e+09	1.54001e+09
Iraq	Construction (ISIC F)	5.2831e+08	1.08261e+09	1.31541e+09	3.15278e+08	8.78849e+08	1.82407e+09	1.92595e+09	1.96195e+09	2.04674e+09	2.17876e+09	3.41571e+09	3.42694e+09	5.36814e+09	6.1334e+09
Iraq	Wholesale, retail trade, restaurants and hotels (ISIC G-H)	2.07358e+09	2.66256e+09	2.1628e+09	1.2099e+09	2.57077e+09	2.85242e+09	3.06649e+09	2.84458e+09	3.23775e+09	3.9053e+09	4.40091e+09	4.85046e+09	4.85147e+09	5.39371e+09
Iraq	Transport, storage and communication (ISIC I)	5.19821e+09	4.87675e+09	5.07143e+09	2.69827e+09	4.12053e+09	3.99975e+09	2.98932e+09	2.48474e+09	2.82976e+09	2.89294e+09	3.13131e+09	3.19213e+09	3.51466e+09	4.29893e+09
Iraq	Other Activities (ISIC J-P)	2.83845e+09	2.8975e+09	2.9418e+09	2.95328e+09	7.85047e+09	8.14332e+09	9.67222e+09	1.05027e+10	1.17522e+10	1.21173e+10	1.18704e+10	1.31324e+10	1.37361e+10	6.0805e+07
Iraq	Total Value Added	5.32728e+10	5.43704e+10	4.96674e+10	3.15611e+10	4.92996e+10	5.02113e+10	5.28128e+10	5.29758e+10	5.82843e+10	6.10673e+10	6.34165e+10	7.05018e+10	7.80983e+10	6.82812e+10
Ireland	Final consumption expenditure	1.00957e+11	1.07203e+11	1.11909e+11	1.15076e+11	1.18638e+11	1.26129e+11	1.34064e+11	1.43036e+11	1.43306e+11	1.36304e+11	1.34726e+11	1.32839e+11	1.30989e+11	1.30603e+11
Ireland	Household consumption expenditure (including Non-profit institutions serving households)	7.50217e+10	7.84199e+10	8.12418e+10	8.34611e+10	8.653e+10	9.2674e+10	9.88404e+10	1.05431e+11	1.05216e+11	9.90849e+10	9.94492e+10	9.83901e+10	9.69692e+10	9.65849e+10
Ireland	General government final consumption expenditure	2.6027e+10	2.87452e+10	3.05602e+10	3.14967e+10	3.20383e+10	3.34552e+10	3.52603e+10	3.76414e+10	3.80807e+10	3.71031e+10	3.5327e+10	3.4534e+10	3.4098e+10	3.40858e+10
Ireland	Gross capital formation	4.30864e+10	4.37652e+10	4.65274e+10	5.00341e+10	5.33207e+10	6.18403e+10	6.61129e+10	6.63087e+10	5.74548e+10	4.39467e+10	3.69261e+10	3.77706e+10	3.88838e+10	3.87766e+10
Ireland	Gross fixed capital formation (including Acquisitions less disposals of valuables)	4.11937e+10	4.34168e+10	4.5795e+10	4.81094e+10	5.31396e+10	6.08566e+10	6.32913e+10	6.50013e+10	5.87436e+10	4.67007e+10	3.82852e+10	3.71722e+10	3.9017e+10	3.80779e+10
Ireland	Changes in inventories	1.3241e+09	5.1216e+08	7.36038e+08	1.39311e+09	4.95292e+08	9.83684e+08	1.98807e+09	1.18839e+09	-2.5148e+08	-1.12782e+09	-4.42389e+08	5.99564e+08	2.20811e+08	6.60134e+08
Ireland	Exports of goods and services	1.27011e+11	1.38729e+11	1.45485e+11	1.46495e+11	1.57546e+11	1.64814e+11	1.73422e+11	1.88732e+11	1.87036e+11	1.79576e+11	1.90656e+11	2.01112e+11	2.10545e+11	2.1292e+11
Ireland	Imports of goods and services	1.10042e+11	1.18406e+11	1.2115e+11	1.19955e+11	1.30022e+11	1.41067e+11	1.51086e+11	1.63123e+11	1.5894e+11	1.44372e+11	1.48729e+11	1.47824e+11	1.58039e+11	1.59062e+11
Ireland	Gross Domestic Product (GDP)	1.65931e+11	1.74682e+11	1.8488e+11	1.90347e+11	1.99062e+11	2.10358e+11	2.21864e+11	2.32807e+11	2.26732e+11	2.12288e+11	2.11703e+11	2.17572e+11	2.16891e+11	2.17267e+11	3.7539e+08
Ireland	Agriculture, hunting, forestry, fishing (ISIC A-B)	2.51186e+09	2.54917e+09	2.75347e+09	2.64898e+09	3.2119e+09	2.47264e+09	1.26702e+09	1.29257e+09	1.27919e+09	1.0447e+09	9.95265e+08	9.68045e+08	9.71788e+08	1.10329e+09
Ireland	Mining, Manufacturing, Utilities (ISIC C-E)	3.56086e+10	3.8323e+10	4.16432e+10	4.11678e+10	4.08488e+10	4.29642e+10	4.51069e+10	4.42753e+10	4.17209e+10	4.1605e+10	4.3242e+10	4.47922e+10	4.39062e+10	4.28723e+10
Ireland	Manufacturing (ISIC D)	3.25424e+10	3.5013e+10	3.8287e+10	3.76459e+10	3.72483e+10	3.91827e+10	4.11411e+10	4.02205e+10	3.75758e+10	3.58905e+10	3.77631e+10	3.97826e+10	3.92597e+10	3.85072e+10
Ireland	Construction (ISIC F)	1.33365e+10	1.37613e+10	1.40149e+10	1.48892e+10	1.63785e+10	1.80937e+10	1.89386e+10	1.91189e+10	1.80213e+10	1.31109e+10	9.68142e+09	8.30882e+09	7.8184e+09	8.73875e+09
Ireland	Wholesale, retail trade, restaurants and hotels (ISIC G-H)	3.01904e+10	3.07426e+10	3.11151e+10	3.00139e+10	2.98343e+10	3.02425e+10	3.15897e+10	3.5429e+10	3.51731e+10	4.28363e+10	4.25543e+10	4.22021e+10	4.2454e+10	4.0293e+10
Ireland	Transport, storage and communication (ISIC I)	1.6549e+10	1.45336e+10	1.3461e+10	1.39001e+10	1.344e+10	1.30983e+10	1.27911e+10	1.42377e+10	1.3965e+10	1.71887e+10	1.70239e+10	1.68576e+10	1.69924e+10	1.61139e+10
Ireland	Other Activities (ISIC J-P)	6.8999e+10	7.17228e+10	7.25856e+10	7.11436e+10	7.52426e+10	7.81698e+10	8.34808e+10	9.01201e+10	9.30505e+10	9.79671e+10	9.81256e+10	9.85823e+10	1.00746e+11	1.0307e+11
Ireland	Total Value Added	1.6827e+11	1.73169e+11	1.78209e+11	1.75692e+11	1.81193e+11	1.85041e+11	1.90175e+11	2.00645e+11	1.99263e+11	2.10936e+11	2.10892e+11	2.12008e+11	2.13139e+11	2.12122e+11
Israel	Final consumption expenditure	1.00564e+11	1.04127e+11	1.06963e+11	1.05864e+11	1.09199e+11	1.12259e+11	1.17267e+11	1.25116e+11	1.2756e+11	1.30674e+11	1.36539e+11	1.41205e+11	1.4576e+11	1.50928e+11
Israel	Household consumption expenditure (including Non-profit institutions serving households)	6.79976e+10	7.03422e+10	7.14646e+10	7.12329e+10	7.51467e+10	7.76307e+10	8.15822e+10	8.83442e+10	8.97755e+10	9.17347e+10	9.6307e+10	9.99486e+10	1.03163e+11	1.06984e+11
Israel	General government final consumption expenditure	3.2599e+10	3.38196e+10	3.55507e+10	3.46722e+10	3.406e+10	3.46282e+10	3.56748e+10	3.67334e+10	3.77519e+10	3.891e+10	4.01921e+10	4.12082e+10	4.25469e+10	4.38888e+10
Israel	Gross capital formation	2.89852e+10	2.80333e+10	2.49883e+10	2.37759e+10	2.42924e+10	2.75053e+10	2.92744e+10	3.19461e+10	3.40304e+10	3.13057e+10	3.48262e+10	4.01569e+10	4.26748e+10	4.30231e+10
Israel	Gross fixed capital formation (including Acquisitions less disposals of valuables)	2.81792e+10	2.72538e+10	2.54235e+10	2.42886e+10	2.42759e+10	2.50513e+10	2.79909e+10	3.06308e+10	3.35099e+10	3.20161e+10	3.50811e+10	4.05825e+10	4.20158e+10	4.25944e+10
Israel	Changes in inventories	4.9534e+08	4.79072e+08	-9.00244e+08	-9.72329e+08	-3.58896e+08	2.45401e+09	1.0517e+09	1.04746e+09	8.15079e+07	-1.32183e+09	-8.4171e+08	-1.12512e+09	1.09635e+08	-1.66289e+08
Israel	Exports of goods and services	5.02768e+10	4.43679e+10	4.33834e+10	4.68674e+10	5.50718e+10	5.75343e+10	6.06988e+10	6.6999e+10	7.11328e+10	6.28283e+10	7.17462e+10	7.70057e+10	7.77119e+10	7.82351e+10
Israel	Imports of goods and services	5.43371e+10	5.14764e+10	5.07631e+10	5.01928e+10	5.61959e+10	5.82045e+10	6.00588e+10	6.6626e+10	6.82046e+10	5.886e+10	6.77608e+10	7.4905e+10	7.66318e+10	7.63901e+10
Israel	Gross Domestic Product (GDP)	1.24846e+11	1.24618e+11	1.24533e+11	1.26372e+11	1.32563e+11	1.39082e+11	1.47146e+11	1.5733e+11	1.64337e+11	1.66388e+11	1.75813e+11	1.83853e+11	1.90016e+11	1.96344e+11	6.32802e+09
Israel	Agriculture, hunting, forestry, fishing (ISIC A-B)	1.7138e+09	1.86874e+09	1.92169e+09	1.78552e+09	2.09535e+09	2.26058e+09	2.24395e+09	2.20089e+09	2.2e+09	2.55244e+09	2.30336e+09	2.40268e+09	2.57929e+09	2.60115e+09
Israel	Mining, Manufacturing, Utilities (ISIC C-E)	2.20302e+10	2.03528e+10	1.91981e+10	2.00567e+10	2.08408e+10	2.25863e+10	2.45548e+10	2.57321e+10	2.69759e+10	2.5953e+10	2.99696e+10	2.93696e+10	3.0127e+10	3.19882e+10
Israel	Manufacturing (ISIC D)	1.96943e+10	1.76093e+10	1.66039e+10	1.7536e+10	1.81151e+10	1.96956e+10	2.12754e+10	2.24953e+10	2.38305e+10	2.25028e+10	2.58825e+10	2.5802e+10	2.8085e+10	2.84934e+10
Israel	Construction (ISIC F)	6.4247e+09	6.28001e+09	6.27132e+09	5.99371e+09	5.48352e+09	5.55925e+09	6.12922e+09	6.38737e+09	6.66659e+09	6.82662e+09	7.58514e+09	8.42159e+09	8.82908e+09	8.86258e+09
Israel	Wholesale, retail trade, restaurants and hotels (ISIC G-H)	1.01838e+10	1.00757e+10	1.0008e+10	9.81206e+09	1.11928e+10	1.19688e+10	1.2543e+10	1.36016e+10	1.38918e+10	1.38313e+10	1.4849e+10	1.55019e+10	1.59132e+10	1.65271e+10
Israel	Transport, storage and communication (ISIC I)	1.48098e+10	1.50678e+10	1.52305e+10	1.62127e+10	1.81139e+10	1.80476e+10	1.87106e+10	2.01381e+10	2.21303e+10	2.23772e+10	2.26742e+10	2.45073e+10	2.53425e+10	2.58936e+10
Israel	Other Activities (ISIC J-P)	5.7389e+10	5.7995e+10	5.91463e+10	5.97074e+10	6.17282e+10	6.45625e+10	6.75968e+10	7.14822e+10	7.33394e+10	7.47298e+10	7.62898e+10	7.94099e+10	8.18617e+10	8.48638e+10
Israel	Total Value Added	1.12428e+11	1.11786e+11	1.12158e+11	1.13747e+11	1.19475e+11	1.24985e+11	1.31665e+11	1.39383e+11	1.4481e+11	1.46152e+11	1.53049e+11	1.59145e+11	1.64205e+11	1.70184e+11
Italy	Final consumption expenditure	1.39536e+12	1.41605e+12	1.42054e+12	1.43412e+12	1.44819e+12	1.46455e+12	1.47916e+12	1.49342e+12	1.4847e+12	1.46863e+12	1.48437e+12	1.47771e+12	1.42763e+12	1.39525e+12
Italy	Household consumption expenditure (including Non-profit institutions serving households)	1.06136e+12	1.06793e+12	1.06836e+12	1.07721e+12	1.08785e+12	1.1019e+12	1.11787e+12	1.13085e+12	1.11863e+12	1.10119e+12	1.11483e+12	1.11489e+12	1.07033e+12	1.04043e+12
Italy	General government final consumption expenditure	3.33996e+11	3.48125e+11	3.52179e+11	3.56911e+11	3.60346e+11	3.62652e+11	3.61289e+11	3.62568e+11	3.66075e+11	3.6744e+11	3.69533e+11	3.62818e+11	3.57297e+11	3.54824e+11
Italy	Gross capital formation	3.57732e+11	3.66078e+11	3.82198e+11	3.83578e+11	3.91653e+11	3.90967e+11	4.11751e+11	4.22071e+11	4.07619e+11	3.45224e+11	3.64085e+11	3.60393e+11	3.19517e+11	3.02484e+11
Italy	Gross fixed capital formation (including Acquisitions less disposals of valuables)	3.56471e+11	3.65548e+11	3.8093e+11	3.79885e+11	3.88057e+11	3.94204e+11	4.06753e+11	4.13106e+11	4.00078e+11	3.60014e+11	3.58391e+11	3.51306e+11	3.25356e+11	3.07713e+11
Italy	Changes in inventories	1.26175e+09	5.30767e+08	1.26859e+09	3.6936e+09	3.59561e+09	-3.23708e+09	4.99851e+09	8.96458e+09	7.54141e+09	-1.47903e+10	5.69405e+09	9.08683e+09	-5.83893e+09	-5.22969e+09
Italy	Exports of goods and services	4.22439e+11	4.33737e+11	4.21622e+11	4.16141e+11	4.41782e+11	4.567e+11	4.94274e+11	5.24797e+11	5.08572e+11	4.16772e+11	4.6589e+11	4.90051e+11	4.99728e+11	5.02678e+11
Italy	Imports of goods and services	4.07545e+11	4.16207e+11	4.19253e+11	4.25387e+11	4.45249e+11	4.58747e+11	4.94523e+11	5.21095e+11	5.0207e+11	4.37385e+11	4.91587e+11	4.94175e+11	4.54764e+11	4.42447e+11
Italy	Gross Domestic Product (GDP)	1.76879e+12	1.80015e+12	1.80466e+12	1.80741e+12	1.83603e+12	1.85347e+12	1.89065e+12	1.91853e+12	1.89838e+12	1.79433e+12	1.82502e+12	1.83573e+12	1.7941e+12	1.75957e+12	-3.45365e+10
Italy	Agriculture, hunting, forestry, fishing (ISIC A-B)	3.95017e+10	3.82585e+10	3.66245e+10	3.52143e+10	3.94319e+10	3.75902e+10	3.73692e+10	3.74296e+10	3.78638e+10	3.72482e+10	3.73836e+10	3.80979e+10	3.70718e+10	3.72942e+10
Italy	Mining, Manufacturing, Utilities (ISIC C-E)	3.33294e+11	3.30528e+11	3.3062e+11	3.24962e+11	3.31602e+11	3.33622e+11	3.46895e+11	3.55132e+11	3.46409e+11	2.91622e+11	3.10887e+11	3.14445e+11	3.0491e+11	2.95814e+11
Italy	Manufacturing (ISIC D)	2.89205e+11	2.87403e+11	2.86914e+11	2.81395e+11	2.8656e+11	2.87867e+11	3.01079e+11	3.10166e+11	3.00097e+11	2.47125e+11	2.68944e+11	2.74365e+11	2.63355e+11	2.56084e+11
Italy	Construction (ISIC F)	8.38272e+10	8.86324e+10	9.11409e+10	9.40491e+10	9.61461e+10	9.7958e+10	1.00127e+11	1.0032e+11	9.74126e+10	8.96937e+10	8.63515e+10	8.18557e+10	7.75608e+10	7.30331e+10
Italy	Wholesale, retail trade, restaurants and hotels (ISIC G-H)	2.78882e+11	2.84444e+11	2.78442e+11	2.73709e+11	2.79076e+11	2.82702e+11	2.88705e+11	2.95085e+11	2.90979e+11	2.76725e+11	2.81745e+11	2.85166e+11	2.77471e+11	2.70806e+11
Italy	Transport, storage and communication (ISIC I)	1.14297e+11	1.22038e+11	1.27471e+11	1.29851e+11	1.31795e+11	1.38576e+11	1.39384e+11	1.44786e+11	1.4561e+11	1.35942e+11	1.39209e+11	1.41227e+11	1.3694e+11	1.33856e+11
Italy	Other Activities (ISIC J-P)	7.47691e+11	7.60942e+11	7.66826e+11	7.75655e+11	7.79986e+11	7.81326e+11	7.91807e+11	7.98911e+11	7.98766e+11	7.90578e+11	7.95812e+11	8.00936e+11	7.96043e+11	7.9056e+11
Italy	Total Value Added	1.59749e+12	1.62484e+12	1.63112e+12	1.63344e+12	1.65804e+12	1.67177e+12	1.70429e+12	1.73166e+12	1.71704e+12	1.62181e+12	1.65139e+12	1.66173e+12	1.63e+12	1.60136e+12
Jamaica	Final consumption expenditure	9.20173e+09	9.25108e+09	9.43717e+09	9.7492e+09	9.77722e+09	1.04567e+10	1.06439e+10	1.11703e+10	1.14838e+10	1.0294e+10	1.01868e+10	1.04795e+10	1.04249e+10	1.04464e+10
Jamaica	Household consumption expenditure (including Non-profit institutions serving households)	7.74997e+09	7.74921e+09	7.8752e+09	8.18628e+09	8.34159e+09	8.85878e+09	9.0376e+09	9.42376e+09	9.72195e+09	8.6445e+09	8.53152e+09	8.83964e+09	8.77821e+09	8.81749e+09
Jamaica	General government final consumption expenditure	1.45176e+09	1.50187e+09	1.56196e+09	1.56291e+09	1.43563e+09	1.5979e+09	1.6063e+09	1.74654e+09	1.76183e+09	1.64951e+09	1.65528e+09	1.6399e+09	1.64664e+09	1.62892e+09
Jamaica	Gross capital formation	2.44043e+09	2.72631e+09	2.89927e+09	2.8857e+09	2.94789e+09	3.02477e+09	3.28693e+09	3.11352e+09	2.86749e+09	2.33789e+09	2.29044e+09	2.49159e+09	2.34665e+09	2.486e+09
Jamaica	Gross fixed capital formation (including Acquisitions less disposals of valuables)	2.41355e+09	2.71125e+09	2.88181e+09	2.8676e+09	2.93754e+09	3.00608e+09	3.24566e+09	3.06514e+09	2.82315e+09	2.31693e+09	2.25726e+09	2.44119e+09	2.32026e+09	2.44816e+09
Jamaica	Changes in inventories	2.68774e+07	1.50531e+07	1.74516e+07	1.80942e+07	1.03469e+07	1.86894e+07	4.12711e+07	4.83818e+07	4.43449e+07	2.09561e+07	3.31823e+07	5.03934e+07	2.63847e+07	3.78395e+07
Jamaica	Exports of goods and services	4.03457e+09	3.74641e+09	3.47451e+09	4.02534e+09	4.18287e+09	3.96608e+09	4.64103e+09	4.6608e+09	4.79592e+09	3.9444e+09	3.65022e+09	3.5949e+09	3.49269e+09	3.51312e+09
Jamaica	Imports of goods and services	5.27571e+09	5.18955e+09	5.20561e+09	5.66607e+09	5.76829e+09	6.20826e+09	7.00974e+09	7.21676e+09	7.5019e+09	5.44124e+09	5.17501e+09	5.41741e+09	5.1663e+09	5.29268e+09
Jamaica	Gross Domestic Product (GDP)	1.0401e+10	1.05342e+10	1.06053e+10	1.09942e+10	1.11397e+10	1.12393e+10	1.15621e+10	1.17279e+10	1.16441e+10	1.11273e+10	1.09625e+10	1.11489e+10	1.10857e+10	1.1148e+10	6.22563e+07
Jamaica	Agriculture, hunting, forestry, fishing (ISIC A-B)	6.74735e+08	7.19762e+08	6.69889e+08	7.20591e+08	6.32342e+08	5.83134e+08	6.99622e+08	6.42909e+08	6.03255e+08	6.87593e+08	6.87749e+08	7.58713e+08	7.76364e+08	7.70983e+08
Jamaica	Mining, Manufacturing, Utilities (ISIC C-E)	1.57073e+09	1.57133e+09	1.57447e+09	1.60425e+09	1.63264e+09	1.61864e+09	1.61463e+09	1.61418e+09	1.60115e+09	1.36101e+09	1.30474e+09	1.35642e+09	1.32415e+09	1.31947e+09
Jamaica	Manufacturing (ISIC D)	9.1337e+08	9.06375e+08	8.89327e+08	8.85601e+08	9.02542e+08	8.66976e+08	8.50456e+08	8.60536e+08	8.55886e+08	8.15112e+08	7.82057e+08	7.95691e+08	7.90366e+08	7.86029e+08
Jamaica	Construction (ISIC F)	6.91851e+08	6.92238e+08	6.82628e+08	7.16572e+08	7.77723e+08	8.39249e+08	8.08067e+08	8.44457e+08	7.80463e+08	7.12706e+08	7.03406e+08	7.09254e+08	6.7808e+08	6.90714e+08
Jamaica	Wholesale, retail trade, restaurants and hotels (ISIC G-H)	2.26172e+09	2.25179e+09	2.26085e+09	2.31001e+09	2.35674e+09	2.40434e+09	2.49527e+09	2.52447e+09	2.5262e+09	2.46317e+09	2.40722e+09	2.42451e+09	2.40779e+09	2.41213e+09
Jamaica	Transport, storage and communication (ISIC I)	9.55998e+08	1.00023e+09	1.05304e+09	1.09791e+09	1.11019e+09	1.12645e+09	1.17419e+09	1.19867e+09	1.16205e+09	1.12111e+09	1.09115e+09	1.07057e+09	1.06983e+09	1.07449e+09
Jamaica	Other Activities (ISIC J-P)	3.38177e+09	3.44812e+09	3.52999e+09	3.64127e+09	3.69226e+09	3.71774e+09	3.79673e+09	3.90583e+09	3.95671e+09	3.97344e+09	3.92164e+09	3.92401e+09	3.93222e+09	3.93751e+09
Jamaica	Total Value Added	9.51299e+09	9.65654e+09	9.75469e+09	1.00703e+10	1.01959e+10	1.02896e+10	1.0569e+10	1.0723e+10	1.06293e+10	1.03017e+10	1.00976e+10	1.02152e+10	1.01575e+10	1.01751e+10
Japan	Final consumption expenditure	3.24222e+12	3.31341e+12	3.364e+12	3.39183e+12	3.43397e+12	3.48037e+12	3.50974e+12	3.54376e+12	3.51775e+12	3.51909e+12	3.60895e+12	3.62695e+12	3.69761e+12	3.7718e+12
Japan	Household consumption expenditure (including Non-profit institutions serving households)	2.48925e+12	2.52899e+12	2.5592e+12	2.57192e+12	2.60158e+12	2.64142e+12	2.67056e+12	2.69525e+12	2.67031e+12	2.6524e+12	2.72584e+12	2.73294e+12	2.78825e+12	2.84463e+12
Japan	General government final consumption expenditure	7.52968e+11	7.84417e+11	8.04807e+11	8.19906e+11	8.32387e+11	8.38955e+11	8.39184e+11	8.48511e+11	8.47441e+11	8.66689e+11	8.83113e+11	8.94015e+11	9.09365e+11	9.27169e+11
Japan	Gross capital formation	1.0776e+12	1.05982e+12	9.88063e+11	1.00475e+12	1.03036e+12	1.02713e+12	1.03706e+12	1.05513e+12	1.02361e+12	8.44608e+11	8.82543e+11	8.83823e+11	9.18757e+11	9.29327e+11
Japan	Gross fixed capital formation (including Acquisitions less disposals of valuables)	1.0817e+12	1.05895e+12	1.00704e+12	1.00882e+12	1.01281e+12	1.02137e+12	1.03678e+12	1.04004e+12	9.97325e+11	8.91699e+11	8.89538e+11	9.01839e+11	9.3275e+11	9.56909e+11
Japan	Changes in inventories	-4.10368e+09	8.69185e+08	-1.8976e+10	-4.07555e+09	1.7547e+10	5.75858e+09	2.76724e+08	1.50855e+10	2.62879e+10	-4.70911e+10	-6.99521e+09	-1.80161e+10	-1.39932e+10	-2.75816e+10
Japan	Exports of goods and services	4.91714e+11	4.57527e+11	4.93649e+11	5.4045e+11	6.15945e+11	6.54356e+11	7.1936e+11	7.8194e+11	7.9302e+11	6.01143e+11	7.47598e+11	7.44943e+11	7.43708e+11	7.55567e+11
Japan	Imports of goods and services	4.9839e+11	5.02792e+11	5.04531e+11	5.2446e+11	5.66132e+11	5.89996e+11	6.1673e+11	6.31058e+11	6.33241e+11	5.33749e+11	5.92808e+11	6.27835e+11	6.60913e+11	6.83244e+11
Japan	Gross Domestic Product (GDP)	4.30825e+12	4.32356e+12	4.33608e+12	4.40915e+12	4.51324e+12	4.57187e+12	4.64943e+12	4.75135e+12	4.70186e+12	4.44199e+12	4.64863e+12	4.62759e+12	4.69536e+12	4.7666e+12	7.12414e+10
Japan	Agriculture, hunting, forestry, fishing (ISIC A-B)	6.84987e+10	6.30159e+10	6.69408e+10	6.08575e+10	5.48467e+10	5.54146e+10	5.44819e+10	5.79387e+10	6.20887e+10	5.62439e+10	5.5704e+10	5.68146e+10	5.70033e+10	5.78357e+10
Japan	Mining, Manufacturing, Utilities (ISIC C-E)	9.24608e+11	8.97491e+11	8.8388e+11	9.19165e+11	9.68734e+11	1.01445e+12	1.05894e+12	1.11055e+12	1.12604e+12	9.24836e+11	1.09586e+12	1.05623e+12	1.03298e+12	1.08676e+12
Japan	Manufacturing (ISIC D)	8.25368e+11	7.95918e+11	7.83e+11	8.19412e+11	8.67055e+11	9.04557e+11	9.47179e+11	1.00438e+12	1.01236e+12	8.33178e+11	9.96142e+11	9.70992e+11	9.66199e+11	1.00081e+12
Japan	Construction (ISIC F)	3.16148e+11	3.04619e+11	2.95152e+11	2.8724e+11	2.82395e+11	2.63279e+11	2.66881e+11	2.61235e+11	2.42385e+11	2.37576e+11	2.32125e+11	2.34292e+11	2.3665e+11	2.39862e+11
Japan	Wholesale, retail trade, restaurants and hotels (ISIC G-H)	6.25369e+11	6.46495e+11	6.53363e+11	6.54394e+11	6.76959e+11	6.78784e+11	6.42163e+11	6.17618e+11	6.06432e+11	5.76204e+11	5.95585e+11	6.03902e+11	6.15858e+11	6.19315e+11
Japan	Transport, storage and communication (ISIC I)	3.88044e+11	4.08447e+11	4.2648e+11	4.39898e+11	4.53855e+11	4.59525e+11	4.83442e+11	5.00997e+11	4.95972e+11	4.55978e+11	4.66956e+11	4.66417e+11	4.81932e+11	4.82826e+11
Japan	Other Activities (ISIC J-P)	1.99183e+12	1.98993e+12	1.99282e+12	2.01473e+12	2.03039e+12	2.07052e+12	2.12148e+12	2.18048e+12	2.14604e+12	2.11562e+12	2.12439e+12	2.13391e+12	2.17372e+12	2.19434e+12
Japan	Total Value Added	4.31449e+12	4.31e+12	4.31864e+12	4.37628e+12	4.46718e+12	4.54197e+12	4.62739e+12	4.72882e+12	4.67896e+12	4.36646e+12	4.57062e+12	4.55156e+12	4.59815e+12	4.68093e+12
Jordan	Final consumption expenditure	1.07538e+10	1.12101e+10	1.12192e+10	1.13615e+10	1.21746e+10	1.35141e+10	1.44972e+10	1.58354e+10	1.76218e+10	1.83938e+10	1.75103e+10	1.79237e+10	1.89051e+10	1.91067e+10
Jordan	Household consumption expenditure (including Non-profit institutions serving households)	8.31057e+09	8.7388e+09	8.6503e+09	8.73041e+09	9.65372e+09	1.10554e+10	1.16653e+10	1.27936e+10	1.38623e+10	1.42413e+10	1.38122e+10	1.44656e+10	1.54115e+10	1.53577e+10
Jordan	General government final consumption expenditure	2.44309e+09	2.47114e+09	2.56878e+09	2.63093e+09	2.52077e+09	2.45867e+09	2.83182e+09	3.0418e+09	3.75935e+09	4.15229e+09	3.69795e+09	3.45808e+09	3.49355e+09	3.74896e+09
Jordan	Gross capital formation	2.30523e+09	2.27052e+09	2.27509e+09	2.36488e+09	3.24129e+09	4.29894e+09	3.88845e+09	4.46877e+09	5.2101e+09	4.99231e+09	4.32641e+09	4.43689e+09	4.91315e+09	4.80678e+09
Jordan	Gross fixed capital formation (including Acquisitions less disposals of valuables)	2.17668e+09	2.09396e+09	2.14511e+09	2.34023e+09	2.93378e+09	3.85577e+09	3.49219e+09	4.05765e+09	4.85389e+09	4.77488e+09	4.14045e+09	4.27199e+09	4.75205e+09	4.62642e+09
Jordan	Changes in inventories	1.28552e+08	1.76564e+08	1.29976e+08	2.46461e+07	3.07517e+08	4.43173e+08	3.96259e+08	4.1112e+08	3.56209e+08	2.17414e+08	1.8595e+08	1.64894e+08	1.61084e+08	1.80351e+08
Jordan	Exports of goods and services	4.3186e+09	4.5353e+09	5.36472e+09	5.63614e+09	6.45677e+09	6.63498e+09	7.45391e+09	7.62524e+09	6.70603e+09	6.46113e+09	8.02155e+09	7.61929e+09	7.36067e+09	8.09919e+09
Jordan	Imports of goods and services	7.98794e+09	8.08917e+09	8.36763e+09	8.39537e+09	1.01188e+10	1.18594e+10	1.22575e+10	1.30478e+10	1.34509e+10	1.26008e+10	1.21759e+10	1.17544e+10	1.24993e+10	1.2815e+10
Jordan	Gross Domestic Product (GDP)	9.24351e+09	9.73064e+09	1.02934e+10	1.07218e+10	1.16404e+10	1.25887e+10	1.36068e+10	1.47195e+10	1.57825e+10	1.66491e+10	1.70339e+10	1.74746e+10	1.79378e+10	1.84453e+10	5.07426e+08
Jordan	Agriculture, hunting, forestry, fishing (ISIC A-B)	2.19207e+08	2.23079e+08	2.78696e+08	3.11454e+08	3.46308e+08	3.47252e+08	3.92642e+08	3.97472e+08	4.31738e+08	4.87133e+08	5.20808e+08	5.41328e+08	4.90706e+08	4.73409e+08
Jordan	Mining, Manufacturing, Utilities (ISIC C-E)	1.69053e+09	1.80957e+09	2.1204e+09	2.16904e+09	2.44613e+09	2.5983e+09	2.88197e+09	3.16202e+09	3.39235e+09	3.30939e+09	3.48464e+09	3.66445e+09	3.70626e+09	3.74049e+09
Jordan	Manufacturing (ISIC D)	1.1539e+09	1.24029e+09	1.49475e+09	1.53837e+09	1.79145e+09	1.93533e+09	2.15555e+09	2.34882e+09	2.47917e+09	2.53167e+09	2.66245e+09	2.76988e+09	2.83486e+09	2.88957e+09
Jordan	Construction (ISIC F)	3.50773e+08	3.94679e+08	4.29387e+08	4.29669e+08	4.81173e+08	5.38983e+08	5.65309e+08	5.95971e+08	6.75927e+08	7.64974e+08	7.29858e+08	6.98839e+08	6.92186e+08	7.52243e+08
Jordan	Wholesale, retail trade, restaurants and hotels (ISIC G-H)	9.65502e+08	1.00409e+09	1.01985e+09	1.06337e+09	1.13832e+09	1.25544e+09	1.39701e+09	1.50151e+09	1.63584e+09	1.69476e+09	1.5838e+09	1.64293e+09	1.75466e+09	1.81038e+09
Jordan	Transport, storage and communication (ISIC I)	1.2628e+09	1.38767e+09	1.39833e+09	1.50361e+09	1.6687e+09	1.77223e+09	1.8324e+09	2.00349e+09	2.05002e+09	2.08848e+09	2.19715e+09	2.27042e+09	2.3639e+09	2.45729e+09
Jordan	Other Activities (ISIC J-P)	3.848e+09	3.99118e+09	4.24456e+09	4.3906e+09	4.62374e+09	5.1606e+09	5.49278e+09	5.85001e+09	6.3461e+09	6.54671e+09	6.9122e+09	7.13185e+09	7.45017e+09	7.7229e+09
Jordan	Total Value Added	8.30642e+09	8.79423e+09	9.47877e+09	9.8649e+09	1.07261e+10	1.16728e+10	1.2565e+10	1.35167e+10	1.4528e+10	1.49019e+10	1.54171e+10	1.59321e+10	1.64125e+10	1.69052e+10
Kazakhstan	Final consumption expenditure	5.08031e+10	5.6114e+10	5.63428e+10	6.26085e+10	7.08e+10	3.49057e+10	8.44985e+10	9.47366e+10	9.8722e+10	9.85677e+10	1.08388e+11	1.19758e+11	1.32212e+11	1.41904e+11
Kazakhstan	Household consumption expenditure (including Non-profit institutions serving households)	1.82033e+10	1.96294e+10	2.02244e+10	2.26101e+10	2.5734e+10	2.84801e+10	3.1022e+10	3.45588e+10	3.63142e+10	3.62318e+10	4.05344e+10	4.47521e+10	4.91507e+10	5.36568e+10
Kazakhstan	General government final consumption expenditure	4.36822e+09	5.2037e+09	4.81577e+09	5.24279e+09	5.79711e+09	6.42557e+09	6.67332e+09	7.6582e+09	7.74077e+09	7.74903e+09	7.97062e+09	8.8339e+09	9.95559e+09	9.96782e+09
Kazakhstan	Gross capital formation	6.86269e+09	9.64019e+09	1.06965e+10	1.13817e+10	1.31038e+10	1.76911e+10	2.2326e+10	2.79604e+10	2.39651e+10	2.42112e+10	2.47138e+10	2.60528e+10	2.90018e+10	3.18261e+10
Kazakhstan	Gross fixed capital formation (including Acquisitions less disposals of valuables)	6.83999e+09	8.5671e+09	9.42438e+09	1.01753e+10	1.24659e+10	1.59744e+10	2.00802e+10	2.3658e+10	2.35273e+10	2.30826e+10	2.39348e+10	2.47885e+10	2.70339e+10	2.94522e+10
Kazakhstan	Changes in inventories	1.96402e+08	1.03592e+09	1.20889e+09	1.17886e+09	8.09005e+08	1.71666e+09	2.22437e+09	3.87323e+09	9.47553e+08	1.45822e+09	1.21624e+09	1.6056e+09	2.19644e+09	2.56684e+09
Kazakhstan	Exports of goods and services	2.19693e+10	2.15762e+10	2.51607e+10	2.7038e+10	3.00697e+10	3.03866e+10	3.14352e+10	3.43945e+10	3.42452e+10	2.98847e+10	3.09202e+10	3.09424e+10	3.21994e+10	3.18559e+10
Kazakhstan	Imports of goods and services	2.06237e+10	2.06898e+10	2.13288e+10	1.96999e+10	2.2634e+10	2.5459e+10	2.77887e+10	3.52186e+10	3.06875e+10	2.56317e+10	2.64156e+10	2.70643e+10	3.26049e+10	3.40025e+10
Kazakhstan	Gross Domestic Product (GDP)	3.48769e+10	3.96017e+10	4.34629e+10	4.75179e+10	5.20731e+10	5.71237e+10	6.32359e+10	6.88911e+10	7.11761e+10	7.20329e+10	7.72883e+10	8.30578e+10	8.72278e+10	9.24832e+10	5.25538e+09
Kazakhstan	Agriculture, hunting, forestry, fishing (ISIC A-B)	2.75313e+09	3.22449e+09	3.32654e+09	3.39975e+09	3.39592e+09	3.63851e+09	3.85713e+09	4.19986e+09	3.93982e+09	4.45905e+09	3.9418e+09	4.82924e+09	3.98745e+09	4.40882e+09
Kazakhstan	Mining, Manufacturing, Utilities (ISIC C-E)	1.05505e+10	1.19906e+10	1.34241e+10	1.46904e+10	1.63231e+10	1.70169e+10	1.82614e+10	1.91591e+10	1.96014e+10	2.02365e+10	2.19246e+10	2.2664e+10	2.30033e+10	2.36163e+10
Kazakhstan	Manufacturing (ISIC D)	4.41898e+09	5.02438e+09	5.40623e+09	5.83332e+09	6.42249e+09	6.87849e+09	7.42189e+09	7.98595e+09	7.74637e+09	7.52947e+09	8.55348e+09	9.15785e+09	9.43387e+09	9.60376e+09
Kazakhstan	Construction (ISIC F)	1.67845e+09	2.13834e+09	2.55532e+09	2.80574e+09	3.20976e+09	4.47762e+09	6.10747e+09	7.13964e+09	7.42522e+09	7.18761e+09	7.56379e+09	7.62731e+09	7.86376e+09	8.09967e+09
Kazakhstan	Wholesale, retail trade, restaurants and hotels (ISIC G-H)	4.32861e+09	4.91347e+09	5.36771e+09	5.95528e+09	6.61006e+09	7.26952e+09	7.98323e+09	9.02427e+09	9.25504e+09	9.03778e+09	9.49487e+09	1.06084e+10	1.21364e+10	1.36302e+10
Kazakhstan	Transport, storage and communication (ISIC I)	4.07925e+09	4.46727e+09	4.91071e+09	5.40863e+09	6.06741e+09	6.74905e+09	7.49427e+09	8.45881e+09	9.13841e+09	9.11723e+09	9.90031e+09	1.0697e+10	1.18664e+10	1.28316e+10
Kazakhstan	Other Activities (ISIC J-P)	9.41724e+09	1.06474e+10	1.1697e+10	1.30059e+10	1.42817e+10	1.56982e+10	1.74168e+10	1.96443e+10	2.03257e+10	2.00638e+10	2.24298e+10	2.35291e+10	2.53639e+10	2.62447e+10
Kazakhstan	Total Value Added	3.31334e+10	3.77266e+10	4.16466e+10	4.56573e+10	5.03073e+10	5.48498e+10	6.06651e+10	6.67824e+10	6.86662e+10	6.92433e+10	7.42952e+10	7.89967e+10	8.31089e+10	8.77073e+10
Kenya	Final consumption expenditure	1.66658e+10	1.74293e+10	1.76059e+10	1.80921e+10	1.84749e+10	1.94546e+10	2.08234e+10	2.20123e+10	2.20068e+10	2.31612e+10	2.47478e+10	2.62152e+10	2.77768e+10	2.97385e+10
Kenya	Household consumption expenditure (including Non-profit institutions serving households)	1.3871e+10	1.4595e+10	1.47255e+10	1.50423e+10	1.54057e+10	1.64025e+10	1.76944e+10	1.86315e+10	1.83485e+10	1.91905e+10	2.06276e+10	2.19227e+10	2.31717e+10	2.50719e+10
Kenya	General government final consumption expenditure	2.80212e+09	2.8384e+09	2.88524e+09	3.05837e+09	3.07617e+09	3.05208e+09	3.12345e+09	3.3779e+09	3.66672e+09	3.98439e+09	4.12982e+09	4.29983e+09	4.61514e+09	4.6666e+09
Kenya	Gross capital formation	3.15463e+09	3.53702e+09	2.8184e+09	3.09817e+09	3.33484e+09	3.776e+09	4.62378e+09	5.00101e+09	5.70796e+09	6.34114e+09	7.06225e+09	7.52601e+09	8.25787e+09	8.16178e+09
Kenya	Gross fixed capital formation (including Acquisitions less disposals of valuables)	3.07287e+09	3.45335e+09	3.24402e+09	2.98416e+09	3.20304e+09	4.09346e+09	4.8524e+09	4.95905e+09	5.59647e+09	6.15437e+09	7.02098e+09	7.33993e+09	8.26892e+09	8.38668e+09
Kenya	Changes in inventories	1.50792e+08	1.59475e+08	-4.63152e+08	1.88504e+08	2.138e+08	-3.17461e+08	-1.96775e+08	1.3395e+08	2.29149e+08	3.29987e+08	1.67604e+08	3.4898e+08	1.24871e+08	-1.33128e+08
Kenya	Exports of goods and services	3.47039e+09	3.5984e+09	3.8545e+09	4.13243e+09	4.65291e+09	5.08908e+09	5.2453e+09	5.56828e+09	5.70035e+09	5.40284e+09	5.87529e+09	6.41638e+09	6.40262e+09	6.35024e+09
Kenya	Imports of goods and services	4.96243e+09	5.92855e+09	5.24416e+09	5.25622e+09	5.90252e+09	6.78455e+09	7.99299e+09	8.34513e+09	9.40862e+09	1.0194e+10	1.10211e+10	1.24801e+10	1.31498e+10	1.31828e+10
Kenya	Gross Domestic Product (GDP)	1.78585e+10	1.86563e+10	1.8763e+10	1.93081e+10	2.02935e+10	2.14933e+10	2.28529e+10	2.43442e+10	2.41962e+10	2.49473e+10	2.68718e+10	2.807e+10	2.9647e+10	3.14332e+10	1.78615e+09
Kenya	Agriculture, hunting, forestry, fishing (ISIC A-B)	3.80999e+09	4.17689e+09	4.03258e+09	4.12881e+09	4.20099e+09	4.49185e+09	4.69218e+09	4.93101e+09	4.68528e+09	4.57762e+09	5.03764e+09	5.15672e+09	5.30864e+09	5.57748e+09
Kenya	Mining, Manufacturing, Utilities (ISIC C-E)	2.8404e+09	2.90599e+09	2.98881e+09	3.1997e+09	3.32905e+09	3.45708e+09	3.62729e+09	3.83055e+09	3.84329e+09	3.86506e+09	4.09424e+09	4.42985e+09	4.52624e+09	4.74705e+09
Kenya	Manufacturing (ISIC D)	2.37402e+09	2.41211e+09	2.41494e+09	2.55824e+09	2.67234e+09	2.797e+09	2.97239e+09	3.10245e+09	3.13789e+09	3.10485e+09	3.24468e+09	3.47975e+09	3.46208e+09	3.66658e+09
Kenya	Construction (ISIC F)	7.46712e+08	7.75345e+08	7.60481e+08	7.68068e+08	8.02217e+08	8.62372e+08	9.17123e+08	9.95052e+08	9.78198e+08	1.14976e+09	1.36931e+09	1.42449e+09	1.5842e+09	1.67082e+09
Kenya	Wholesale, retail trade, restaurants and hotels (ISIC G-H)	1.54726e+09	1.61798e+09	1.59135e+09	1.57359e+09	1.75351e+09	1.86777e+09	2.09174e+09	2.28867e+09	2.14934e+09	2.36301e+09	2.54072e+09	2.73226e+09	2.90468e+09	3.10137e+09
Kenya	Transport, storage and communication (ISIC I)	1.21472e+09	1.38254e+09	1.50864e+09	1.56081e+09	1.67009e+09	1.8197e+09	2.02782e+09	2.23207e+09	2.33293e+09	2.5162e+09	2.72326e+09	3.03263e+09	3.11082e+09	3.26899e+09
Kenya	Other Activities (ISIC J-P)	6.40242e+09	6.29795e+09	6.38752e+09	6.55917e+09	6.70034e+09	6.87746e+09	7.06831e+09	7.43312e+09	7.80398e+09	8.19353e+09	8.81183e+09	9.18478e+09	9.70901e+09	1.02226e+10
Kenya	Total Value Added	1.65389e+10	1.7212e+10	1.72752e+10	1.77922e+10	1.84312e+10	1.93762e+10	2.04114e+10	2.16774e+10	2.16783e+10	2.24358e+10	2.43404e+10	2.56646e+10	2.67941e+10	2.82145e+10
Kiribati	Final consumption expenditure	1.49364e+08	1.44383e+08	1.54779e+08	1.49473e+08	1.4973e+08	1.78254e+08	1.55499e+08	1.56154e+08	1.58181e+08	1.58723e+08	1.49884e+08	1.55658e+08	1.75885e+08	1.68758e+08
Kiribati	Household consumption expenditure (including Non-profit institutions serving households)	1.07873e+08	1.04276e+08	1.11785e+08	1.07952e+08	1.08138e+08	1.28739e+08	1.12304e+08	1.12777e+08	1.14242e+08	1.14633e+08	1.08249e+08	1.12419e+08	1.27028e+08	1.2188e+08
Kiribati	General government final consumption expenditure	4.14904e+07	4.01069e+07	4.29947e+07	4.15206e+07	4.15921e+07	4.95156e+07	4.31946e+07	4.33766e+07	4.39397e+07	4.40901e+07	4.16349e+07	4.32387e+07	4.88575e+07	4.68777e+07
Kiribati	Gross capital formation	4.68073e+07	4.52464e+07	4.85043e+07	4.68414e+07	4.6922e+07	5.58609e+07	4.87298e+07	4.89352e+07	4.95705e+07	4.97401e+07	4.69703e+07	4.87796e+07	5.51185e+07	5.28849e+07
Kiribati	Gross fixed capital formation (including Acquisitions less disposals of valuables)	4.65356e+07	4.49838e+07	4.82228e+07	4.65695e+07	4.66497e+07	5.55367e+07	4.8447e+07	4.86511e+07	4.92827e+07	4.94514e+07	4.66976e+07	4.84964e+07	5.47985e+07	5.25779e+07
Kiribati	Changes in inventories	271699	262649	281555	271902	272372	324259	282864	284057	287744	288730	272651	283154	319950	306984
Kiribati	Exports of goods and services	1.41001e+07	1.66827e+07	1.94617e+07	1.79669e+07	1.2418e+07	1.58006e+07	1.20606e+07	1.90442e+07	1.58954e+07	1.62965e+07	1.21142e+07	1.38219e+07	1.20736e+07	1.3345e+07
Kiribati	Imports of goods and services	1.01064e+08	1.02304e+08	1.18431e+08	1.05576e+08	1.02229e+08	1.3778e+08	1.05928e+08	1.11315e+08	1.1098e+08	1.11258e+08	9.73055e+07	1.06405e+08	1.27448e+08	1.16005e+08
Kiribati	Gross Domestic Product (GDP)	1.09207e+08	1.04009e+08	1.04314e+08	1.08704e+08	1.06841e+08	1.12136e+08	1.10361e+08	1.12819e+08	1.12667e+08	1.13501e+08	1.11663e+08	1.11854e+08	1.1563e+08	1.18983e+08	3.35326e+06
Kiribati	Agriculture, hunting, forestry, fishing (ISIC A-B)	2.72275e+07	2.58726e+07	2.40595e+07	2.50249e+07	2.55213e+07	2.27544e+07	2.51136e+07	2.51397e+07	2.60057e+07	2.59208e+07	2.49128e+07	2.73274e+07	2.82606e+07	2.82317e+07
Kiribati	Mining, Manufacturing, Utilities (ISIC C-E)	5.1648e+06	5.02052e+06	5.41013e+06	5.07584e+06	5.24634e+06	5.89422e+06	5.74218e+06	5.8668e+06	5.48638e+06	5.77085e+06	5.9153e+06	5.67796e+06	5.73518e+06	6.08147e+06
Kiribati	Manufacturing (ISIC D)	4.70561e+06	4.55477e+06	4.95386e+06	4.56285e+06	4.68147e+06	5.30335e+06	5.13381e+06	5.25381e+06	4.90096e+06	5.17779e+06	5.32701e+06	5.09197e+06	5.13527e+06	5.45897e+06
Kiribati	Construction (ISIC F)	3.99787e+06	3.96783e+06	3.93868e+06	3.9104e+06	3.96166e+06	3.84234e+06	3.74701e+06	3.79223e+06	3.90959e+06	4.0248e+06	4.05064e+06	4.05818e+06	4.10986e+06	4.28735e+06
Kiribati	Wholesale, retail trade, restaurants and hotels (ISIC G-H)	8.98555e+06	8.82132e+06	9.10001e+06	7.03643e+06	7.16373e+06	6.146e+06	5.81573e+06	7.91979e+06	1.01741e+07	1.02352e+07	9.66787e+06	8.98039e+06	7.83974e+06	9.30716e+06
Kiribati	Transport, storage and communication (ISIC I)	1.05031e+07	1.02968e+07	9.57019e+06	1.15492e+07	1.20537e+07	1.45831e+07	1.24695e+07	1.12829e+07	1.04378e+07	1.02668e+07	1.21578e+07	1.11402e+07	1.14571e+07	1.21981e+07
Kiribati	Other Activities (ISIC J-P)	4.42768e+07	4.48072e+07	4.54014e+07	4.73317e+07	4.7532e+07	5.12792e+07	5.41389e+07	5.39627e+07	5.50669e+07	5.59725e+07	5.47549e+07	5.45473e+07	5.79665e+07	5.86719e+07
Kiribati	Total Value Added	1.00304e+08	9.89812e+07	9.77728e+07	1.00054e+08	1.01567e+08	1.04499e+08	1.07204e+08	1.08283e+08	1.11548e+08	1.12694e+08	1.11793e+08	1.12079e+08	1.15729e+08	1.19143e+08
Kosovo	Final consumption expenditure	3.97429e+09	4.12411e+09	3.98509e+09	3.99339e+09	3.96715e+09	4.18793e+09	4.26504e+09	4.57668e+09	4.90714e+09	4.94639e+09	5.04052e+09	5.15278e+09	5.25624e+09	5.49807e+09
Kosovo	Household consumption expenditure (including Non-profit institutions serving households)	2.94108e+09	3.06138e+09	3.02009e+09	3.07216e+09	3.10089e+09	3.31058e+09	3.446e+09	3.78525e+09	4.10868e+09	4.19435e+09	4.32212e+09	4.45443e+09	4.56452e+09	4.74703e+09
Kosovo	General government final consumption expenditure	1.0332e+09	1.06272e+09	9.65002e+08	9.21231e+08	8.66262e+08	8.77357e+08	8.19032e+08	7.9143e+08	7.98461e+08	7.5205e+08	7.18401e+08	6.98347e+08	6.91718e+08	7.51046e+08
Kosovo	Gross capital formation	9.9104e+08	1.15339e+09	1.01133e+09	8.86186e+08	8.65892e+08	8.98125e+08	9.36676e+08	9.7481e+08	1.12379e+09	1.24419e+09	1.39746e+09	1.55605e+09	1.37315e+09	1.54039e+09
Kosovo	Gross fixed capital formation (including Acquisitions less disposals of valuables)	9.9104e+08	1.15339e+09	1.01133e+09	8.86186e+08	7.20671e+08	7.37203e+08	7.72397e+08	8.14361e+08	9.68415e+08	1.10017e+09	1.23982e+09	1.38931e+09	1.2166e+09	1.36916e+09
Kosovo	Changes in inventories					1.45221e+08	1.60921e+08	1.64279e+08	1.60448e+08	1.55374e+08	1.44025e+08	1.5764e+08	1.66741e+08	1.56554e+08	1.71225e+08
Kosovo	Exports of goods and services	6.06288e+08	5.77319e+08	4.49026e+08	3.80741e+08	3.8281e+08	4.13869e+08	5.23181e+08	6.03779e+08	6.04773e+08	6.77874e+08	7.65884e+08	8.29348e+08	8.35766e+08	8.64625e+08
Kosovo	Imports of goods and services	2.45761e+09	2.26045e+09	1.93753e+09	1.73925e+09	1.62027e+09	1.76566e+09	1.8634e+09	1.974e+09	2.15457e+09	2.24814e+09	2.44039e+09	2.57055e+09	2.38513e+09	2.63364e+09
Kosovo	Gross Domestic Product (GDP)	3.03155e+09	3.81166e+09	3.85611e+09	3.63009e+09	3.5957e+09	3.73427e+09	3.86149e+09	4.182e+09	4.48398e+09	4.63954e+09	4.78853e+09	4.99966e+09	5.1267e+09	5.30613e+09	1.79434e+08
Kosovo	Agriculture, hunting, forestry, fishing (ISIC A-B)	2.2544e+08	2.82246e+08	2.83577e+08	2.6789e+08	2.59443e+08	4.87315e+08	4.90259e+08	4.41423e+08	3.69952e+08	3.36979e+08	3.04704e+08	2.94203e+08	2.42893e+08	3.00424e+08
Kosovo	Mining, Manufacturing, Utilities (ISIC C-E)	4.13186e+08	5.13471e+08	5.48294e+08	4.67698e+08	4.55334e+08	5.22474e+08	5.66644e+08	6.73664e+08	8.13949e+08	8.05592e+08	7.84135e+08	8.63971e+08	8.77209e+08	8.97913e+08
Kosovo	Manufacturing (ISIC D)	2.73932e+08	3.39402e+08	3.62022e+08	2.82661e+08	3.12686e+08	3.60363e+08	2.47431e+08	2.29902e+08	3.34759e+08	3.24969e+08	2.24366e+08	2.11936e+08	3.08793e+08	2.64383e+08
Kosovo	Construction (ISIC F)	2.64064e+08	3.45949e+08	3.13329e+08	3.22668e+08	3.61533e+08	3.40102e+08	3.03098e+08	3.00858e+08	2.58752e+08	3.10767e+08	2.62044e+08	2.22028e+08	1.67428e+08	2.33098e+08
Kosovo	Wholesale, retail trade, restaurants and hotels (ISIC G-H)	3.13229e+08	4.02272e+08	3.90516e+08	3.79587e+08	4.06616e+08	4.96346e+08	4.33037e+08	4.65001e+08	5.54601e+08	5.39808e+08	6.54898e+08	4.16882e+08	4.37569e+08	5.40336e+08
Kosovo	Transport, storage and communication (ISIC I)	1.06787e+08	1.38742e+08	1.34901e+08	1.24329e+08	1.43537e+08	1.7567e+08	1.44598e+08	1.35823e+08	1.53981e+08	1.23396e+08	1.45524e+08	1.80108e+08	1.95165e+08	1.84799e+08
Kosovo	Other Activities (ISIC J-P)	1.21883e+09	1.5155e+09	1.6032e+09	1.43434e+09	1.39247e+09	1.26586e+09	1.45659e+09	1.63575e+09	1.61944e+09	1.72619e+09	1.70717e+09	2.05818e+09	2.0504e+09	2.06607e+09
Kosovo	Total Value Added	2.54154e+09	3.19818e+09	3.27382e+09	2.99651e+09	3.01893e+09	3.28776e+09	3.39423e+09	3.65252e+09	3.77067e+09	3.84273e+09	3.85848e+09	4.03537e+09	3.97066e+09	4.22264e+09
Kuwait	Final consumption expenditure	2.78691e+10	2.81181e+10	3.1933e+10	3.34403e+10	3.53324e+10	3.86747e+10	4.23674e+10	4.6719e+10	4.85282e+10	4.55603e+10	4.16128e+10	4.38322e+10	4.81229e+10	4.74234e+10
Kuwait	Household consumption expenditure (including Non-profit institutions serving households)	1.79047e+10	1.82214e+10	2.09565e+10	2.20184e+10	2.33748e+10	2.59795e+10	2.79842e+10	3.12372e+10	3.17626e+10	2.79995e+10	2.48576e+10	2.58894e+10	2.75904e+10	2.87273e+10
Kuwait	General government final consumption expenditure	1.00823e+10	9.99306e+09	1.1048e+10	1.14861e+10	1.20095e+10	1.26952e+10	1.4452e+10	1.55028e+10	1.68864e+10	1.79372e+10	1.72023e+10	1.84564e+10	2.12167e+10	1.91482e+10
Kuwait	Gross capital formation	4.94739e+09	5.88154e+09	7.52933e+09	8.81229e+09	1.13902e+10	1.32705e+10	1.55518e+10	2.15697e+10	2.18864e+10	1.77529e+10	1.811e+10	1.87271e+10	1.93356e+10	2.35158e+10
Kuwait	Gross fixed capital formation (including Acquisitions less disposals of valuables)	4.88802e+09	5.63754e+09	7.06003e+09	8.67594e+09	9.34486e+09	1.18151e+10	1.59737e+10	1.8888e+10	2.30648e+10	1.78e+10	1.82023e+10	1.88226e+10	1.94342e+10	2.36356e+10
Kuwait	Changes in inventories	8.08245e+07	2.61803e+08	4.85134e+08	1.73211e+08	2.01001e+09	1.45548e+09	-3.27446e+08	2.66763e+09	-1.01948e+09	4.1439e+07
Kuwait	Exports of goods and services	3.82378e+10	3.79861e+10	3.34449e+10	4.39436e+10	4.75192e+10	5.16918e+10	5.5697e+10	5.55554e+10	5.67831e+10	5.31806e+10	5.2916e+10	6.00304e+10	6.43827e+10	6.25637e+10
Kuwait	Imports of goods and services	1.36854e+10	1.46427e+10	1.56629e+10	1.77031e+10	2.03515e+10	2.2839e+10	2.3918e+10	2.98347e+10	3.09647e+10	2.70961e+10	2.88134e+10	3.03025e+10	3.17424e+10	3.38824e+10
Kuwait	Gross Domestic Product (GDP)	5.47069e+10	5.48252e+10	5.64801e+10	6.6263e+10	7.30482e+10	8.07979e+10	8.68701e+10	9.2075e+10	9.43584e+10	8.76815e+10	8.23871e+10	9.07989e+10	9.83419e+10	9.79116e+10	-4.30334e+08
Kuwait	Agriculture, hunting, forestry, fishing (ISIC A-B)	1.66153e+08	2.02626e+08	2.35046e+08	2.51256e+08	2.51256e+08	2.43151e+08	1.78716e+08	1.94115e+08	1.64532e+08	2.11541e+08	5.07913e+08	7.87266e+08	7.93615e+08	7.47566e+08
Kuwait	Mining, Manufacturing, Utilities (ISIC C-E)	3.6717e+10	3.5712e+10	3.31486e+10	3.98253e+10	4.37305e+10	4.89623e+10	4.89663e+10	4.74771e+10	4.95664e+10	4.28527e+10	4.38402e+10	5.04478e+10	5.64623e+10	5.42387e+10
Kuwait	Manufacturing (ISIC D)	3.56894e+09	3.3548e+09	4.2738e+09	5.01882e+09	5.58092e+09	5.86644e+09	5.93157e+09	5.55193e+09	6.47762e+09	5.80532e+09	5.91174e+09	6.69467e+09	8.05868e+09	7.42274e+09
Kuwait	Construction (ISIC F)	1.00589e+09	9.97717e+08	1.2635e+09	1.34937e+09	1.46795e+09	1.49658e+09	1.58244e+09	1.64378e+09	1.73374e+09	1.5988e+09	1.6027e+09	1.61982e+09	1.64616e+09	1.76345e+09
Kuwait	Wholesale, retail trade, restaurants and hotels (ISIC G-H)	2.83585e+09	2.8858e+09	3.49294e+09	3.74271e+09	3.99248e+09	4.06164e+09	4.30988e+09	4.50431e+09	4.08777e+09	3.90948e+09	4.25565e+09	4.24217e+09	4.30823e+09	4.64047e+09
Kuwait	Transport, storage and communication (ISIC I)	2.02356e+09	2.24351e+09	2.23985e+09	3.094e+09	3.97747e+09	4.21575e+09	6.31263e+09	7.71666e+09	9.90885e+09	1.14045e+10	9.03308e+09	8.46382e+09	8.91066e+09	9.5779e+09
Kuwait	Other Activities (ISIC J-P)	1.59004e+10	1.66532e+10	1.84241e+10	2.04622e+10	2.19767e+10	2.48288e+10	3.03159e+10	3.51716e+10	3.29526e+10	3.00452e+10	3.39317e+10	3.50669e+10	3.60684e+10	3.80167e+10
Kuwait	Total Value Added	5.96204e+10	5.92843e+10	5.86464e+10	6.87497e+10	7.53176e+10	8.38082e+10	8.98123e+10	9.31614e+10	9.48168e+10	8.54923e+10	8.88106e+10	9.71079e+10	1.05132e+11	1.04977e+11
Kyrgyzstan	Final consumption expenditure	1.81657e+09	1.83826e+09	1.8982e+09	2.22548e+09	2.376e+09	2.5108e+09	2.89496e+09	2.96746e+09	3.28424e+09	2.90377e+09	2.96047e+09	3.19596e+09	3.49898e+09	3.646e+09
Kyrgyzstan	Household consumption expenditure (including Non-profit institutions serving households)	1.35082e+09	1.38126e+09	1.44621e+09	1.78688e+09	1.9203e+09	2.08001e+09	2.47961e+09	2.54608e+09	2.8739e+09	2.46047e+09	2.52747e+09	2.76386e+09	3.07275e+09	3.22736e+09
Kyrgyzstan	General government final consumption expenditure	4.24616e+08	4.19196e+08	4.18267e+08	4.23447e+08	4.42876e+08	4.30786e+08	4.37067e+08	4.44805e+08	4.51234e+08	4.57961e+08	4.53009e+08	4.63136e+08	4.72709e+08	4.73883e+08
Kyrgyzstan	Gross capital formation	4.40597e+08	4.15926e+08	3.89107e+08	2.8747e+08	3.55307e+08	4.03927e+08	6.19119e+08	7.09646e+08	8.08286e+08	7.68738e+08	7.29068e+08	7.7523e+08	1.10411e+09	1.14941e+09
Kyrgyzstan	Gross fixed capital formation (including Acquisitions less disposals of valuables)	3.9473e+08	3.87292e+08	3.59115e+08	3.36537e+08	3.61595e+08	3.98844e+08	5.97686e+08	6.60656e+08	7.49455e+08	8.10141e+08	7.51709e+08	7.18507e+08	9.8043e+08	1.00582e+09
Kyrgyzstan	Changes in inventories	-5.10346e+07	-2.75996e+07	-3.03161e+07	7.75478e+07	1.95705e+07	5.0839e+06	-1.13488e+07	-4.72789e+07	-5.81057e+07	8.13509e+07	5.38228e+07	-5.61467e+07	-1.40148e+08	-1.66725e+08
Kyrgyzstan	Exports of goods and services	8.52231e+08	8.2463e+08	8.91255e+08	9.38397e+08	1.05865e+09	9.42411e+08	1.02625e+09	1.2915e+09	1.4091e+09	1.39386e+09	1.23077e+09	1.42426e+09	1.1505e+09	1.38118e+09
Kyrgyzstan	Imports of goods and services	9.98549e+08	8.60309e+08	9.72833e+08	1.12844e+09	1.31198e+09	1.39689e+09	2.02539e+09	2.24819e+09	2.55346e+09	2.05896e+09	1.91768e+09	2.20393e+09	2.47641e+09	2.64083e+09
Kyrgyzstan	Gross Domestic Product (GDP)	2.04315e+09	2.15188e+09	2.15151e+09	2.30276e+09	2.46457e+09	2.46025e+09	2.53659e+09	2.75328e+09	2.9846e+09	3.07075e+09	3.05627e+09	3.23831e+09	3.23545e+09	3.57628e+09	3.40826e+08
Kyrgyzstan	Agriculture, hunting, forestry, fishing (ISIC A-B)	6.15174e+08	6.59938e+08	6.8044e+08	7.02182e+08	7.31031e+08	7.006e+08	7.12487e+08	7.23976e+08	7.30221e+08	7.79326e+08	7.59285e+08	7.73305e+08	7.8295e+08	8.05276e+08
Kyrgyzstan	Mining, Manufacturing, Utilities (ISIC C-E)	4.39248e+08	4.6855e+08	4.18663e+08	4.88005e+08	5.00824e+08	4.27565e+08	3.75039e+08	3.98272e+08	4.65208e+08	4.27629e+08	4.73929e+08	5.11396e+08	4.03219e+08	5.42047e+08
Kyrgyzstan	Manufacturing (ISIC D)	3.22974e+08	3.52278e+08	3.13965e+08	3.6999e+08	3.78134e+08	3.14495e+08	2.70008e+08	2.87134e+08	3.48035e+08	3.15648e+08	3.51407e+08	3.70802e+08	2.68565e+08	3.90598e+08
Kyrgyzstan	Construction (ISIC F)	5.19983e+07	5.40749e+07	5.48352e+07	5.3634e+07	5.65292e+07	6.64662e+07	7.91723e+07	1.04747e+08	1.1607e+08	1.41703e+08	1.15503e+08	1.18402e+08	1.53547e+08	1.72565e+08
Kyrgyzstan	Wholesale, retail trade, restaurants and hotels (ISIC G-H)	2.7007e+08	2.86586e+08	3.12751e+08	3.54724e+08	4.19875e+08	4.70708e+08	5.42362e+08	6.02314e+08	6.61319e+08	6.77532e+08	6.3789e+08	7.06412e+08	7.8262e+08	8.4048e+08
Kyrgyzstan	Transport, storage and communication (ISIC I)	1.22257e+08	1.186e+08	1.19957e+08	1.30716e+08	1.52069e+08	1.7075e+08	1.87049e+08	2.70164e+08	3.54067e+08	3.71977e+08	3.87762e+08	4.22331e+08	4.59348e+08	5.12283e+08
Kyrgyzstan	Other Activities (ISIC J-P)	3.62045e+08	3.75406e+08	3.77844e+08	3.80687e+08	3.91308e+08	4.01688e+08	4.11449e+08	4.22335e+08	4.36109e+08	4.42318e+08	4.43092e+08	4.58482e+08	4.68021e+08	4.72872e+08
Kyrgyzstan	Total Value Added	1.93157e+09	2.03401e+09	2.00976e+09	2.15279e+09	2.27152e+09	2.23778e+09	2.27543e+09	2.46465e+09	2.69073e+09	2.7461e+09	2.73857e+09	2.89755e+09	2.91078e+09	3.21284e+09
Lao People's DR	Final consumption expenditure	1.88209e+09	1.89606e+09	1.89666e+09	1.95299e+09	1.98415e+09	2.12332e+09	2.02393e+09	2.20281e+09	2.39538e+09	2.53737e+09	2.72385e+09	2.99652e+09	3.27623e+09	3.48547e+09
Lao People's DR	Household consumption expenditure (including Non-profit institutions serving households)	1.66482e+09	1.6663e+09	1.65936e+09	1.74118e+09	1.76645e+09	1.89995e+09	1.78025e+09	1.93719e+09	2.08066e+09	2.15918e+09	2.3563e+09	2.58662e+09	2.7665e+09	2.98865e+09
Lao People's DR	General government final consumption expenditure	2.21255e+08	2.36011e+08	2.45097e+08	2.13127e+08	2.19548e+08	2.23372e+08	2.50032e+08	2.72616e+08	3.27673e+08	4.01164e+08	3.8428e+08	4.29447e+08	5.43824e+08	5.23702e+08
Lao People's DR	Gross capital formation	5.27164e+08	5.65456e+08	7.4524e+08	7.84686e+08	9.60785e+08	9.87511e+08	1.2579e+09	1.70498e+09	1.73282e+09	1.7558e+09	1.53039e+09	1.79837e+09	2.34355e+09	2.18383e+09
Lao People's DR	Gross fixed capital formation (including Acquisitions less disposals of valuables)	4.69629e+08	5.03742e+08	6.63905e+08	6.72821e+08	8.32867e+08	9.31679e+08	1.18678e+09	1.60859e+09	1.63485e+09	1.65653e+09	1.44387e+09	1.69669e+09	2.21105e+09	2.06036e+09
Lao People's DR	Changes in inventories	-3.04715e+07	-3.26849e+07	-4.30769e+07	-1.02361e+08	-1.05658e+08	5.58317e+07	7.11187e+07	9.6396e+07	9.797e+07	9.92689e+07	8.6525e+07	1.01676e+08	1.32499e+08	1.23469e+08
Lao People's DR	Exports of goods and services	5.47252e+08	5.49149e+08	5.76483e+08	5.00019e+08	5.34845e+08	7.01208e+08	9.00801e+08	8.27705e+08	8.28238e+08	8.58817e+08	1.07273e+09	1.21231e+09	1.27855e+09	1.38096e+09
Lao People's DR	Imports of goods and services	9.33602e+08	8.46336e+08	8.40509e+08	7.05293e+08	8.36778e+08	1.05871e+09	1.1357e+09	1.27614e+09	1.26852e+09	1.23657e+09	1.26896e+09	1.55888e+09	1.89557e+09	1.81993e+09
Lao People's DR	Gross Domestic Product (GDP)	1.9986e+09	2.11355e+09	2.23864e+09	2.37766e+09	2.5446e+09	2.71678e+09	2.95164e+09	3.18312e+09	3.43092e+09	3.6883e+09	3.9882e+09	4.30887e+09	4.6492e+09	5.01965e+09	3.70448e+08
Lao People's DR	Agriculture, hunting, forestry, fishing (ISIC A-B)	8.27233e+08	8.58457e+08	8.74786e+08	8.9675e+08	9.27443e+08	9.3414e+08	9.57124e+08	1.03969e+09	1.07838e+09	1.1089e+09	1.14423e+09	1.17464e+09	1.21307e+09	1.2555e+09
Lao People's DR	Mining, Manufacturing, Utilities (ISIC C-E)	2.86054e+08	3.04735e+08	3.23825e+08	3.96206e+08	4.09965e+08	4.73331e+08	5.58329e+08	5.76606e+08	6.44029e+08	7.48538e+08	8.74782e+08	9.79915e+08	1.07014e+09	1.08667e+09
Lao People's DR	Manufacturing (ISIC D)	1.44375e+08	1.61839e+08	1.74535e+08	1.84357e+08	2.12231e+08	2.19732e+08	2.41887e+08	2.77609e+08	3.03611e+08	3.24257e+08	3.46955e+08	3.80706e+08	4.36056e+08	4.62099e+08
Lao People's DR	Construction (ISIC F)	7.9463e+07	8.98175e+07	1.13093e+08	1.2561e+08	1.31256e+08	1.25306e+08	1.24791e+08	1.36706e+08	1.4366e+08	1.84603e+08	2.21524e+08	2.76537e+08	3.29494e+08	3.68416e+08
Lao People's DR	Wholesale, retail trade, restaurants and hotels (ISIC G-H)	3.06622e+08	3.27799e+08	4.03896e+08	4.08496e+08	4.91925e+08	5.38185e+08	5.73578e+08	6.33259e+08	6.79133e+08	7.25384e+08	7.72435e+08	8.40702e+08	9.27083e+08	9.94927e+08
Lao People's DR	Transport, storage and communication (ISIC I)	8.51895e+07	9.2516e+07	1.1006e+08	1.16999e+08	1.15617e+08	1.36115e+08	1.48005e+08	1.59e+08	1.71941e+08	1.81398e+08	1.93552e+08	2.10047e+08	2.23223e+08	2.36739e+08
Lao People's DR	Other Activities (ISIC J-P)	2.65826e+08	2.71255e+08	2.919e+08	3.0677e+08	3.34622e+08	3.69735e+08	4.30134e+08	4.74187e+08	5.53415e+08	6.03887e+08	6.59611e+08	7.10753e+08	7.76759e+08	8.88413e+08
Lao People's DR	Total Value Added	1.85711e+09	1.9509e+09	2.12336e+09	2.25206e+09	2.41372e+09	2.57681e+09	2.78754e+09	3.0166e+09	3.26444e+09	3.53941e+09	3.8446e+09	4.1635e+09	4.50472e+09	4.79395e+09
Latvia	Final consumption expenditure	9.71399e+09	1.02159e+10	1.07959e+10	1.15191e+10	1.2531e+10	1.36201e+10	1.59153e+10	1.73701e+10	1.63695e+10	1.3927e+10	1.39811e+10	1.43979e+10	1.47459e+10	1.55504e+10
Latvia	Household consumption expenditure (including Non-profit institutions serving households)	7.16622e+09	7.5271e+09	8.01998e+09	8.62715e+09	9.55129e+09	1.05814e+10	1.27213e+10	1.40977e+10	1.2976e+10	1.08752e+10	1.12124e+10	1.15422e+10	1.18868e+10	1.26193e+10
Latvia	General government final consumption expenditure	2.50338e+09	2.64107e+09	2.73308e+09	2.85443e+09	2.95822e+09	3.03863e+09	3.23557e+09	3.34272e+09	3.42364e+09	3.05833e+09	2.80962e+09	2.89725e+09	2.90929e+09	2.99391e+09
Latvia	Gross capital formation	2.57987e+09	3.29939e+09	3.50063e+09	4.40901e+09	5.46358e+09	5.94534e+09	7.14642e+09	8.48818e+09	7.25518e+09	4.26567e+09	3.57326e+09	5.07768e+09	5.20782e+09	5.05231e+09
Latvia	Gross fixed capital formation (including Acquisitions less disposals of valuables)	2.69378e+09	3.23016e+09	3.11792e+09	3.4418e+09	4.43693e+09	5.3486e+09	6.15545e+09	7.53775e+09	6.84198e+09	4.56373e+09	3.65281e+09	4.53569e+09	5.19493e+09	4.92308e+09
Latvia	Changes in inventories	-1.1556e+07	1.41137e+08	3.74105e+08	8.23169e+08	8.95356e+08	5.9675e+08	9.15848e+08	9.23398e+08	4.9968e+08	-9.86879e+07	4.0754e+07	5.33115e+08	1.52847e+08	2.32968e+08
Latvia	Exports of goods and services	4.40954e+09	4.80805e+09	5.04998e+09	5.2509e+09	5.97192e+09	7.37543e+09	7.92764e+09	9.01829e+09	9.23221e+09	8.04263e+09	9.12372e+09	1.02228e+10	1.12224e+10	1.13888e+10
Latvia	Imports of goods and services	5.24142e+09	6.06117e+09	6.22547e+09	6.96415e+09	8.42856e+09	9.84954e+09	1.19562e+10	1.40305e+10	1.25249e+10	8.55267e+09	9.61427e+09	1.17324e+10	1.23637e+10	1.2399e+10
Latvia	Gross Domestic Product (GDP)	1.14159e+10	1.22325e+10	1.31119e+10	1.42436e+10	1.55135e+10	1.70914e+10	1.90777e+10	2.0946e+10	2.02809e+10	1.74039e+10	1.69038e+10	1.77485e+10	1.86065e+10	1.93912e+10	7.8471e+08
Latvia	Agriculture, hunting, forestry, fishing (ISIC A-B)	5.29784e+08	5.67922e+08	6.11144e+08	5.83836e+08	6.02387e+08	6.47775e+08	6.23857e+08	6.66797e+08	6.24328e+08	7.03522e+08	6.58228e+08	6.46551e+08	6.83465e+08	6.92222e+08
Latvia	Mining, Manufacturing, Utilities (ISIC C-E)	1.87511e+09	1.97295e+09	2.16131e+09	2.27703e+09	2.38614e+09	2.47013e+09	2.62062e+09	2.63034e+09	2.52831e+09	2.12476e+09	2.30308e+09	2.33349e+09	2.3828e+09	2.35861e+09
Latvia	Manufacturing (ISIC D)	1.46133e+09	1.55467e+09	1.72917e+09	1.77147e+09	1.8964e+09	1.989e+09	2.1212e+09	2.09058e+09	1.9654e+09	1.50143e+09	1.71872e+09	1.78706e+09	1.87484e+09	1.87011e+09
Latvia	Construction (ISIC F)	6.04715e+08	5.83558e+08	6.44291e+08	6.62461e+08	7.89776e+08	9.70232e+08	1.51857e+09	2.40728e+09	2.6084e+09	1.52803e+09	9.1037e+08	1.18665e+09	1.46941e+09	1.60096e+09
Latvia	Wholesale, retail trade, restaurants and hotels (ISIC G-H)	1.45185e+09	1.54279e+09	1.75338e+09	2.03332e+09	2.19779e+09	2.6873e+09	3.12e+09	3.52255e+09	3.28772e+09	2.74352e+09	2.69056e+09	2.79963e+09	2.84728e+09	2.9815e+09
Latvia	Transport, storage and communication (ISIC I)	1.58935e+09	1.8206e+09	1.95261e+09	2.11569e+09	2.30656e+09	2.54406e+09	2.7026e+09	2.72225e+09	2.82511e+09	2.11877e+09	2.08717e+09	2.37863e+09	2.4134e+09	2.63334e+09
Latvia	Other Activities (ISIC J-P)	4.50184e+09	4.61497e+09	4.699e+09	5.04195e+09	5.35109e+09	5.75954e+09	6.28025e+09	6.91976e+09	6.8898e+09	6.42383e+09	6.03065e+09	6.34671e+09	6.54781e+09	6.85686e+09
Latvia	Total Value Added	1.06168e+10	1.11901e+10	1.19183e+10	1.28054e+10	1.37018e+10	1.5079e+10	1.672e+10	1.84586e+10	1.83059e+10	1.53982e+10	1.46377e+10	1.55813e+10	1.61665e+10	1.68979e+10
Lebanon	Final consumption expenditure	1.82069e+10	1.91538e+10	1.97029e+10	2.03357e+10	2.11216e+10	2.05937e+10	2.1268e+10	2.27827e+10	2.47784e+10	2.80228e+10	3.00414e+10	2.97451e+10	3.16926e+10	3.22749e+10
Lebanon	Household consumption expenditure (including Non-profit institutions serving households)	1.54948e+10	1.6316e+10	1.67239e+10	1.73093e+10	1.81747e+10	1.7594e+10	1.81996e+10	1.95378e+10	2.1409e+10	2.41906e+10	2.62925e+10	2.5969e+10	2.74218e+10	2.79905e+10
Lebanon	General government final consumption expenditure	2.71563e+09	2.84055e+09	2.98542e+09	3.0302e+09	2.93929e+09	2.99967e+09	3.06663e+09	3.24063e+09	3.35535e+09	3.81751e+09	3.71212e+09	3.74341e+09	4.25058e+09	4.25991e+09
Lebanon	Gross capital formation	3.59105e+09	4.25754e+09	3.76386e+09	4.00107e+09	4.83901e+09	4.98308e+09	4.08306e+09	5.42231e+09	6.82688e+09	8.10838e+09	8.5161e+09	8.42452e+09	8.12646e+09	9.14431e+09
Lebanon	Gross fixed capital formation (including Acquisitions less disposals of valuables)	3.72273e+09	3.93576e+09	4.02645e+09	4.25739e+09	4.73792e+09	4.7728e+09	4.77647e+09	5.74144e+09	6.96401e+09	8.95512e+09	8.96859e+09	8.41543e+09	8.5629e+09	9.54255e+09
Lebanon	Changes in inventories	2.05447e+07	2.45398e+08	-3.60859e+07	-2.78051e+07	1.56509e+08	2.10282e+08	-2.28112e+08	-2.46225e+07	9.14146e+07	-2.07735e+08	-1.6132e+07	1.95282e+08	-1.75471e+07	2.32074e+07
Lebanon	Exports of goods and services	4.28539e+09	5.00534e+09	5.63101e+09	6.03081e+09	7.65913e+09	8.01592e+09	7.74017e+09	8.63433e+09	9.34139e+09	1.0254e+10	1.12755e+10	1.09551e+10	1.07794e+10	1.12581e+10
Lebanon	Imports of goods and services	8.9622e+09	1.08443e+10	1.06382e+10	1.12872e+10	1.27996e+10	1.21035e+10	1.16997e+10	1.32876e+10	1.51886e+10	1.8005e+10	1.90634e+10	1.80552e+10	1.87071e+10	2.00481e+10
Lebanon	Gross Domestic Product (GDP)	1.7541e+10	1.82345e+10	1.88497e+10	1.946e+10	2.09153e+10	2.14899e+10	2.18554e+10	2.38969e+10	2.61072e+10	2.87323e+10	3.10418e+10	3.13264e+10	3.21919e+10	3.3162e+10	9.70089e+08
Lebanon	Agriculture, hunting, forestry, fishing (ISIC A-B)	7.79819e+08	7.96195e+08	7.73105e+08	7.94752e+08	7.98726e+08	7.65506e+08	7.57562e+08	7.74533e+08	7.32286e+08	7.71283e+08	8.04503e+08	8.60833e+08	8.31585e+08	8.33029e+08
Lebanon	Mining, Manufacturing, Utilities (ISIC C-E)	2.04286e+09	2.05302e+09	2.09253e+09	2.19176e+09	2.2736e+09	2.39204e+09	2.38881e+09	2.7969e+09	3.02087e+09	3.02787e+09	3.18616e+09	3.28145e+09	3.3326e+09	3.45858e+09
Lebanon	Manufacturing (ISIC D)	1.34639e+09	1.34715e+09	1.37251e+09	1.44194e+09	1.50299e+09	1.58076e+09	1.6041e+09	1.91568e+09	2.06199e+09	2.01387e+09	2.14268e+09	2.17233e+09	2.19615e+09	2.27976e+09
Lebanon	Construction (ISIC F)	7.93223e+08	7.51975e+08	7.60999e+08	7.78502e+08	7.95629e+08	8.22554e+08	8.44094e+08	1.00497e+09	1.14161e+09	1.3698e+09	1.50308e+09	1.55154e+09	1.56029e+09	1.6754e+09
Lebanon	Wholesale, retail trade, restaurants and hotels (ISIC G-H)	2.62151e+09	2.54548e+09	2.89931e+09	2.96599e+09	3.01345e+09	3.02952e+09	2.89458e+09	3.26175e+09	3.66698e+09	4.00411e+09	4.4914e+09	4.51298e+09	4.54512e+09	4.6128e+09
Lebanon	Transport, storage and communication (ISIC I)	8.45432e+08	1.00184e+09	9.96828e+08	1.11744e+09	1.21354e+09	1.26302e+09	1.2761e+09	1.40405e+09	1.60251e+09	1.85842e+09	2.01594e+09	1.95623e+09	2.02617e+09	2.22862e+09
Lebanon	Other Activities (ISIC J-P)	9.51125e+09	9.67581e+09	1.00177e+10	1.02145e+10	1.04806e+10	1.09539e+10	1.14805e+10	1.19608e+10	1.26697e+10	1.36627e+10	1.46615e+10	1.49525e+10	1.53443e+10	1.56481e+10
Lebanon	Total Value Added	1.66483e+10	1.68558e+10	1.76162e+10	1.81307e+10	1.86245e+10	1.92265e+10	1.95813e+10	2.11299e+10	2.27299e+10	2.45497e+10	2.6531e+10	2.69882e+10	2.74781e+10	2.82401e+10
Lesotho	Final consumption expenditure	1.85292e+09	1.82681e+09	1.87429e+09	1.90744e+09	1.92444e+09	2.00281e+09	2.06098e+09	2.15902e+09	2.27957e+09	2.33465e+09	2.49255e+09	2.62406e+09	2.72128e+09	3.00415e+09
Lesotho	Household consumption expenditure (including Non-profit institutions serving households)	1.4091e+09	1.37084e+09	1.36671e+09	1.39468e+09	1.44147e+09	1.50066e+09	1.54476e+09	1.61664e+09	1.68987e+09	1.75116e+09	1.89674e+09	2.03379e+09	2.06093e+09	2.26999e+09
Lesotho	General government final consumption expenditure	4.42884e+08	4.55883e+08	5.09282e+08	5.14314e+08	4.82987e+08	5.02153e+08	5.16205e+08	5.42428e+08	5.9052e+08	5.8341e+08	5.945e+08	5.87211e+08	6.59362e+08	7.33296e+08
Lesotho	Gross capital formation	4.9394e+08	4.66779e+08	3.83876e+08	3.66296e+08	3.49258e+08	3.00739e+08	3.02195e+08	3.80863e+08	4.84817e+08	4.51536e+08	5.33284e+08	4.28822e+08	5.21655e+08	5.28974e+08
Lesotho	Gross fixed capital formation (including Acquisitions less disposals of valuables)	4.89391e+08	4.58841e+08	3.95515e+08	3.86252e+08	3.46314e+08	2.88956e+08	3.1126e+08	3.47259e+08	4.87764e+08	4.45024e+08	4.76602e+08	4.88233e+08	5.89703e+08	5.91665e+08
Lesotho	Changes in inventories	3.68754e+06	7.33653e+06	-1.31909e+07	-2.19519e+07	2.3193e+06	1.17829e+07	-1.02818e+07	3.46909e+07	-4.22365e+06	5.86156e+06	5.87639e+07	-6.38433e+07	-7.31952e+07	-6.75434e+07
Lesotho	Exports of goods and services	3.17697e+08	4.38546e+08	5.92543e+08	6.91878e+08	7.29548e+08	6.68785e+08	7.53831e+08	7.86292e+08	8.68839e+08	8.31804e+08	8.9399e+08	9.21378e+08	9.12366e+08	9.51888e+08
Lesotho	Imports of goods and services	1.45897e+09	1.5757e+09	1.56606e+09	1.64017e+09	1.66444e+09	1.65397e+09	1.69892e+09	1.81731e+09	2.0265e+09	1.97445e+09	2.12934e+09	2.17725e+09	2.22419e+09	2.42068e+09
Lesotho	Gross Domestic Product (GDP)	1.1873e+09	1.23751e+09	1.2441e+09	1.30246e+09	1.33234e+09	1.36835e+09	1.42729e+09	1.49485e+09	1.58055e+09	1.63363e+09	1.74947e+09	1.7991e+09	1.91625e+09	2.02707e+09	1.10816e+08
Lesotho	Agriculture, hunting, forestry, fishing (ISIC A-B)	1.3682e+08	1.5452e+08	1.09116e+08	1.12851e+08	1.11827e+08	1.13378e+08	1.01688e+08	1.00752e+08	1.17069e+08	1.11142e+08	1.30071e+08	1.26098e+08	1.27152e+08	1.43068e+08
Lesotho	Mining, Manufacturing, Utilities (ISIC C-E)	1.98862e+08	2.39508e+08	2.95521e+08	3.35525e+08	3.58083e+08	3.56041e+08	3.88086e+08	4.17817e+08	4.24874e+08	4.23744e+08	4.63149e+08	4.44052e+08	4.5687e+08	5.18189e+08
Lesotho	Manufacturing (ISIC D)	1.41233e+08	1.78509e+08	2.31186e+08	2.61408e+08	2.76933e+08	2.43796e+08	2.64617e+08	2.70126e+08	2.76062e+08	2.58162e+08	2.9435e+08	2.59707e+08	2.49546e+08	3.14407e+08
Lesotho	Construction (ISIC F)	1.05349e+08	9.33301e+07	7.4782e+07	7.18392e+07	5.79935e+07	6.02654e+07	5.9425e+07	5.9872e+07	7.70977e+07	8.1027e+07	9.23341e+07	9.55707e+07	1.28411e+08	1.09984e+08
Lesotho	Wholesale, retail trade, restaurants and hotels (ISIC G-H)	9.24017e+07	9.4527e+07	9.74234e+07	1.03095e+08	1.05307e+08	1.10982e+08	1.16248e+08	1.22561e+08	1.30688e+08	1.31094e+08	1.3963e+08	1.48367e+08	1.64581e+08	1.66665e+08
Lesotho	Transport, storage and communication (ISIC I)	5.19421e+07	5.71615e+07	6.35669e+07	6.64252e+07	7.21466e+07	8.1741e+07	9.07159e+07	1.01721e+08	1.13205e+08	1.28013e+08	1.3967e+08	1.50891e+08	1.67297e+08	1.62569e+08
Lesotho	Other Activities (ISIC J-P)	4.99385e+08	5.03281e+08	5.24891e+08	5.3354e+08	5.42463e+08	5.44975e+08	5.71893e+08	5.86519e+08	5.99001e+08	6.34057e+08	6.51413e+08	6.87207e+08	7.10504e+08	7.67126e+08
Lesotho	Total Value Added	1.09657e+09	1.15244e+09	1.16873e+09	1.22486e+09	1.24739e+09	1.26738e+09	1.32596e+09	1.38582e+09	1.46052e+09	1.50796e+09	1.61534e+09	1.65268e+09	1.7573e+09	1.86739e+09
Liberia	Final consumption expenditure	504437600	643235470	742197156	245610287	747716699	845943380	1294127340	1234459098	1555606351	1412618419	1500998508	1628653749	1656264530	1850239038
Liberia	Household consumption expenditure (including Non-profit institutions serving households)	463682081	598236287	710935267	219991226	686319408	776867647	1229622241	1130698240	1393757830	1256365993	1344567862	1451225277	1461826809	1646549003
Liberia	General government final consumption expenditure	40755519	44999183	31261890	25619061	61397290	69075733	64505099	103760857	161848522	156252426	156430646	177428472	194437720	203690035
Liberia	Gross capital formation	40580788	23426399	77759248	30416411	34999943	80864000	168371553	206595294	302032158	185712785	289691128	292452726	319246682	348420150
Liberia	Gross fixed capital formation (including Acquisitions less disposals of valuables)	40580788	23426399	77759248	30416411	34999943	80864000	168371553	206595294	302032158	185712785	289691128	292452726	319246682	348420150
Liberia	Exports of goods and services	141432953	188685827	311182429	535586292	146941316	144807196	212579607	246783887	303746544	151386206	210448431	319563706	406844050	357882826
Liberia	Imports of goods and services	145374166	194714903	259813233	226361982	374312057	463614576	984998499	925466279	1278208053	757957411	902386066	1078602181	1125279225	1197790709
Liberia	Gross Domestic Product (GDP)	541077175	660632794	871325600	585251008	555345900	608000000	690080000	762372000	883177000	991760000	1098752000	1162068000	1257076037	1358751305	101675268
Liberia	Agriculture, hunting, forestry, fishing (ISIC A-B)	362785303	497372965	665122211	447385874	397277807	404000000	420160000	483715000	556764000	624195000	707421000	746808000	815029442	879863542
Liberia	Mining, Manufacturing, Utilities (ISIC C-E)	2613949	34423778	44651561	23653332	31929754	38300000	50286219	57611000	81748000	82159000	87494000	92278000	101741930	109073992
Liberia	Manufacturing (ISIC D)	1640125	31386386	41085638	20544608	27398469	33000000	42801000	47828000	51499000	54417000	57618000	61161000	66733954	71807045
Liberia	Construction (ISIC F)	707304	11390221	17054416	10812952	17914384	19000000	19076000	21740000	23430000	24541000	26675000	27898000	30631979	32722198
Liberia	Wholesale, retail trade, restaurants and hotels (ISIC G-H)	83638206	25311601	32558430	28383998	24237108	29000000	37642000	39132000	44591000	48015000	51216000	53650000	57981960	61808596
Liberia	Transport, storage and communication (ISIC I)	23576794	35436242	46512043	37845331	34774980	39000000	37869000	44567000	48840000	51216000	56551000	57942000	63451957	68171245
Liberia	Other Activities (ISIC J-P)	32086273	45018491	50498789	30701060	36882555	58000000	73212000	56702000	73007000	77891000	82159000	87986000	95177935	103620293
Liberia	Total Value Added	505407828	648953298	856397449	578782545	543016589	587300000	638245219	703467000	828380000	908017000	1011516000	1066562000	1164015203	1255259867
Libya	Final consumption expenditure	1.09101e+10	1.23066e+10	1.25024e+10	1.30163e+10	1.29057e+10	1.4748e+10	1.5647e+10	1.63127e+10	1.68758e+10	1.67112e+10	1.73874e+10	6.75165e+09	1.37948e+10	1.15545e+10
Libya	Household consumption expenditure (including Non-profit institutions serving households)	6.25454e+09	7.2471e+09	8.38399e+09	8.64348e+09	8.38418e+09	9.9604e+09	1.03787e+10	1.08146e+10	1.1258e+10	1.11004e+10	1.15556e+10	4.49202e+09	9.16972e+09	7.68237e+09
Libya	General government final consumption expenditure	5.09543e+09	5.47982e+09	4.14202e+09	4.43107e+09	4.65262e+09	4.78755e+09	5.3429e+09	5.57799e+09	5.67282e+09	5.68416e+09	5.90585e+09	2.28644e+09	4.68312e+09	3.92005e+09
Libya	Gross capital formation	9.35889e+09	9.0305e+09	1.05712e+10	9.76086e+09	1.07514e+10	1.26437e+10	1.27701e+10	1.36385e+10	1.41295e+10	1.38752e+10	1.45134e+10	5.63149e+09	1.14915e+10	9.63582e+09
Libya	Gross fixed capital formation (including Acquisitions less disposals of valuables)	9.47489e+09	9.14244e+09	1.07023e+10	9.88184e+09	1.07514e+10	1.26437e+10	1.27701e+10	1.36385e+10	1.41295e+10	1.38752e+10	1.45134e+10	5.63149e+09	1.14915e+10	9.63582e+09
Libya	Exports of goods and services	2.4059e+10	2.05344e+10	2.3728e+10	2.8413e+10	3.06576e+10	3.16693e+10	3.49313e+10	3.67128e+10	3.73002e+10	3.73002e+10	3.87922e+10	1.50187e+10	3.07511e+10	2.57461e+10
Libya	Imports of goods and services	6.73007e+09	8.86693e+09	1.21822e+10	1.25043e+10	1.27669e+10	1.36095e+10	1.49705e+10	1.55992e+10	1.5958e+10	1.59261e+10	1.65472e+10	6.41474e+09	1.31271e+10	1.09898e+10
Libya	Gross Domestic Product (GDP)	3.51939e+10	3.5374e+10	3.49317e+10	3.94605e+10	4.12109e+10	4.54515e+10	4.85038e+10	5.09711e+10	5.84295e+10	5.79933e+10	6.05013e+10	2.34332e+10	4.7917e+10	4.01477e+10	-7.7693e+09
Libya	Agriculture, hunting, forestry, fishing (ISIC A-B)	8.76022e+08	9.14313e+08	9.48169e+08	9.8178e+08	1.02777e+09	1.10633e+09	1.21512e+09	1.26345e+09	1.29407e+09	1.32574e+09	1.31469e+09	4.07296e+08	9.89827e+08	7.99853e+08
Libya	Mining, Manufacturing, Utilities (ISIC C-E)	2.88799e+10	2.86953e+10	2.69997e+10	3.22649e+10	3.40973e+10	3.66521e+10	3.82996e+10	3.92126e+10	3.96976e+10	3.73341e+10	3.87314e+10	1.08611e+10	2.79106e+10	2.25649e+10
Libya	Manufacturing (ISIC D)	1.85876e+09	1.75696e+09	1.84229e+09	2.12791e+09	2.25066e+09	2.39359e+09	2.50605e+09	2.69742e+09	2.65338e+09	2.74689e+09	2.77983e+09	6.397e+08	1.92644e+09	1.51824e+09
Libya	Construction (ISIC F)	1.47852e+09	1.55098e+09	1.81879e+09	1.59994e+09	1.74481e+09	2.05097e+09	2.20658e+09	2.56899e+09	2.98864e+09	3.25813e+09	3.44705e+09	7.24328e+08	2.30108e+09	1.81879e+09
Libya	Wholesale, retail trade, restaurants and hotels (ISIC G-H)	1.09451e+09	1.20316e+09	1.46369e+09	1.54874e+09	1.6737e+09	2.03112e+09	2.20161e+09	2.44231e+09	2.51807e+09	2.68154e+09	2.85657e+09	1.17152e+09	2.2912e+09	1.94081e+09
Libya	Transport, storage and communication (ISIC I)	9.58415e+08	1.04962e+09	1.25505e+09	1.34954e+09	1.48518e+09	1.84397e+09	2.07542e+09	2.33127e+09	2.54123e+09	2.71849e+09	2.90469e+09	1.21997e+09	2.3471e+09	1.99473e+09
[truncated: 1,832 more rows]
