# Supplementary material
Source: ML conference proceedings conference paper supplement (https://openreview.net/forum?id=tfyr2zRVoK)
Supplement: supplementary_material [file 2_MaturityDate_gt1.xlsx]

## Sheet: Sheet1
Loan Issue Date	Length of Loan in Days	Days Passed
2010-09-16	120	121
2010-12-09	90	37
2011-01-05	90	10
2010-09-10	100	127
2010-12-22	90	24
2010-10-17	120	90
2011-01-12	120	3
2010-09-18	180	119
2010-09-05	80	132
