# Supplementary material
Source: ML conference proceedings conference paper supplement (https://openreview.net/forum?id=tfyr2zRVoK)
Supplement: supplementary_material [file 2_NetIncome_gt1.xlsx]

## Sheet: Sheet2
Total Revenue	Total Expenses

## Sheet: Sheet1
Revenue	Total Expenses
39929	10828
55389	14977
52686	29650
49490	28708
38279	10990
30002	22022
56315	29700
54870	23324
39465	24834
26176	24207
32121	24773
59875	25871
42235	22797
55101	29775
35972	20109
51922	12614
42471	14555
46706	16246
58782	25706
