# Supplementary material
Source: ML conference proceedings conference paper supplement (https://openreview.net/forum?id=tfyr2zRVoK)
Supplement: supplementary_material [file 2_PeriodRate_gt1.xlsx]

## Sheet: Sheet1
Annual Rate (%)	Period per year	Adjusted Annual Rate
11.25	2	12.25
7.776	6	8.776
15.496	6	16.496
9.32	2	10.32
18.584	6	19.584
18.198	8	19.198
17.812	5	18.812
14.724	2	15.724
16.268	7	17.268
13.566	8	14.566
14.338	5	15.338
9.706	5	10.706
13.566	2	14.566
9.706	5	10.706
13.566	7	14.566
7.776	7	8.776
15.11	5	16.11
15.496	3	16.496
14.724	1	15.724
12.794	7	13.794
9.32	5	10.32
16.268	7	17.268
10.478	2	11.478
18.584	7	19.584
