# Supplementary material
Source: ML conference proceedings conference paper supplement (https://openreview.net/forum?id=tfyr2zRVoK)
Supplement: supplementary_material [file 2_PricingTable_gt1.xlsx]

## Sheet: Sheet1
Date	Days Since Sale	Number of Rolls	Price	Revenue
2015-09-16	107	540
2015-09-15	108	360
2015-09-16	107	12
2015-09-15	108	468
2015-09-17	106	48
2015-09-18	105	84
2015-09-17	106	540
2015-09-18	105	492
2015-09-18	105	204
2015-09-15	108	408
2015-09-17	106	780
2015-09-16	107	444
2015-09-15	108	432
2015-09-16	107	456
2015-09-16	107	768
2015-09-17	106	528
2015-09-15	108	624
2015-09-17	106	372
2015-09-18	105	588
2015-09-15	108	504
2015-09-16	107	504
2015-09-18	105	660
2015-09-16	107	468
2015-09-18	105	492
2015-09-18	105	204

## Sheet: Pricing Table
Units From	Units To	Price per Roll (100 feet)
0	143	198
144	288	187
289	577	168
578	999	152
