# Supplementary material
Source: ML conference proceedings conference paper supplement (https://openreview.net/forum?id=tfyr2zRVoK)
Supplement: supplementary_material [file 2_SimpleCompoundInterest_gt1.xlsx]

## Sheet: Sheet1
Year	Simple Interest	Compound Interest
1	5	5
2	10	10.25
3	15	15.7625
4	20	21.5506
5	25	27.6282
6	30	34.0096
7	35	40.71
8	40	47.7455
9	45	55.1328
10	50	62.8895
