# Supplementary material
Source: ML conference proceedings conference paper supplement (https://openreview.net/forum?id=tfyr2zRVoK)
Supplement: supplementary_material [file 2_StockChange_gt1.xlsx]

## Sheet: Sheet1
Stock	Value of Stock on Jan 1	Value of Stock on Dec 31
A	98	103.1
B	98.3702	95.5202
C	100.098	99.3478
D	95.9022	110.752
E	98.1234	109.223
F	95.532	95.232
G	99.851	85.901
H	101.208	106.458
I	98.7404	97.3904
J	95.9022	100.552
K	95.532	107.082
L	96.2724	101.222
