# Supplementary material
Source: ML conference proceedings conference paper supplement (https://openreview.net/forum?id=tfyr2zRVoK)
Supplement: supplementary_material [file 2_Tax_gt1.xlsx]

## Sheet: Sheet1
Week	Sales	Total Expenses Before Tax	Profit Before Tax	Tax Expense
Week 1	169864	17641	152223	28922.4
Week 2	112663	81793	30870	5865.3
Week 3	151992	131215	20777	3947.63
Week 4	156866	130607	26259	4989.21
Week 5	108855	9203	99652	18933.9
Week 6	145067	96964	48103	9139.57
Week 7	195791	105986	89805	17063
Week 8	144664	72052	72612	13796.3
Week 9	169962	19366	150596	28613.2
Week 10	168508	162750	5758	1094.02
