# Supplementary material
Source: ML conference proceedings conference paper supplement (https://openreview.net/forum?id=tfyr2zRVoK)
Supplement: supplementary_material [file 2_VelocityDisplacement_gt1.xlsx]

## Sheet: Sheet1
Displacement m	Velocity m/s	Time s
2	21	0.0952381
4	35	0.114286
6	46	0.130435
8	57	0.140351
10	78	0.128205
12	83	0.144578
14	95	0.147368
16	110	0.145455
18	115	0.156522
20	124	0.16129
22	130	0.169231
24	145	0.165517
26	170	0.152941
28	180	0.155556
30	190	0.157895
32	192	0.166667
34	210	0.161905
36	222	0.162162
38	225	0.168889
40	240	0.166667
