# Supplementary material
Source: ML conference proceedings conference paper supplement (https://openreview.net/forum?id=tfyr2zRVoK)
Supplement: supplementary_material [file 2_XYScatterPlot_gt1.xlsx]

## Sheet: Sheet1
Angle (Degrees)	Angle (Radians)	Range (m)	Height (m)
0	0	0.05	-0.02
2.5	0.0436332	0.087	0.001
5	0.0872665	0.224	-0.016
7.5	0.1309	0.309	0.009
10	0.174533	0.342	-0.005
12.5	0.218166	0.423	0.043
15	0.261799	0.45	0.053
17.5	0.305433	0.524	0.065
20	0.349066	0.593	0.078
22.5	0.392699	0.707	0.073
25	0.436332	0.816	0.089
27.5	0.479966	0.869	0.087
30	0.523599	0.866	0.145
32.5	0.567232	0.906	0.124
35	0.610865	0.89	0.184
37.5	0.654498	0.966	0.165
40	0.698132	0.985	0.187
42.5	0.741765	0.996	0.208
45	0.785398	1	0.23
47.5	0.829031	1.046	0.252
50	0.872665	1.035	0.273
52.5	0.916298	0.966	0.315
55	0.959931	0.94	0.316
57.5	1.00356	0.956	0.376
60	1.0472	0.816	0.375
62.5	1.09083	0.819	0.413
65	1.13446	0.766	0.411
67.5	1.1781	0.707	0.427
70	1.22173	0.693	0.422
72.5	1.26536	0.624	0.455
75	1.309	0.5	0.487
77.5	1.35263	0.373	0.477
80	1.39626	0.392	0.465
82.5	1.4399	0.309	0.491
85	1.48353	0.124	0.516
87.5	1.52716	0.137	0.519
90	1.5708	0.05	0.5
