# Supplementary material
Source: ML conference proceedings conference paper supplement (https://openreview.net/forum?id=tfyr2zRVoK)
Supplement: supplementary_material [file 3_EntireSummerSales_gt1.xlsx]

## Sheet: Sheet2
Summer sales ($)
Sum of Revenue	Column Labels
Row Labels	E-mail Coupon	In Store Sales	Web Site Sales	Grand Total
May	3291.34	6250.64	12079.5	21621.5
Jun	5360.13	17458.7	35564.2	58383
Jul	1566.19	11409.5	10893.3	23868.9
Aug	5947.74	28897.1	17330.8	52175.7
Sep	1927.31	8035.99	11826.7	21790
Grand Total	18092.7	72052	87694.5	177839

## Sheet: Sheet1
Date	Month	Week	Promotion	Sales Channel	Product	Revenue
2020-09-16			None	In Store Sales	Doublers	160.04
2020-07-01			None	In Store Sales	Sunshine	40.76
2020-06-02			Festival of Flight	E-mail Coupon	Crested Beaut	75.62
2020-05-15			None	Web Site Sales	Quad	99.29
2020-05-17			None	In Store Sales	Carlota	46.25
2020-06-10			Festival of Flight	In Store Sales	Majectic Beaut	28.28
2020-05-03			None	In Store Sales	Sunset	71.86
2020-05-13			None	Web Site Sales	Carlota	46.1
2020-09-02			None	Web Site Sales	Bellen	23.25
2020-07-03			None	Web Site Sales	Sunbell	50.9
2020-06-04			Festival of Flight	In Store Sales	Quad	66.85
2020-09-01			None	Web Site Sales	Sunset	24.68
2020-09-10			None	Web Site Sales	Carlota	89
2020-05-21			None	Web Site Sales	Quad	68.25
2020-07-26			None	In Store Sales	Sunshine	20.88
2020-05-12			None	Web Site Sales	Sunbell	24.75
2020-05-12			None	Web Site Sales	Doublers	80.95
2020-07-29			None	Web Site Sales	Quad	306.04
2020-05-18			None	Web Site Sales	Sunshine	20.01
2020-06-30			None	Web Site Sales	Carlota	69.85
2020-05-29			None	In Store Sales	Quad	99
2020-06-13			Festival of Flight	In Store Sales	Quad	68.39
2020-07-16			None	Web Site Sales	FlatTop	28.92
2020-07-29			None	In Store Sales	Carlota	46.85
2020-09-11			None	Web Site Sales	Aspen	479.13
2020-06-10			Festival of Flight	Web Site Sales	Sunset	47.35
2020-05-18			None	Web Site Sales	Sunbell	75.91
2020-06-28			None	Web Site Sales	Sunshine	60.4
2020-06-14			Festival of Flight	Web Site Sales	Sunbell	48.59
2020-07-08			None	Web Site Sales	Sunbell	23.48
2020-05-07			None	In Store Sales	Aspen	20.72
2020-07-28			None	Web Site Sales	Sunshine	60.73
2020-05-10			None	Web Site Sales	Majectic Beaut	413.97
2020-07-08			None	Web Site Sales	Sunshine	40.6
2020-05-31			Festival of Flight	Web Site Sales	Sunshine	57.14
2020-09-03			None	E-mail Coupon	FlatTop	83.12
2020-07-18			None	E-mail Coupon	Crested Beaut	72.02
2020-09-12			None	E-mail Coupon	Aspen	80.27
2020-09-06			None	E-mail Coupon	Sunshine	60.95
2020-05-11			None	In Store Sales	Carlota	23.07
2020-06-13			Festival of Flight	In Store Sales	Sunshine	60.63
2020-07-14			None	Web Site Sales	Aspen	40.43
2020-07-27			None	In Store Sales	Sunshine	40.34
2020-07-14			None	In Store Sales	Sunshine	19.05
2020-05-18			None	E-mail Coupon	Sunshine	40.36
2020-06-27			Festival of Flight	Web Site Sales	Majectic Beaut	90.41
2020-09-07			None	E-mail Coupon	Carlota	23.46
2020-07-24			None	Web Site Sales	Crested Beaut	46.27
2020-09-17			None	In Store Sales	FlatTop	83.46
2020-06-09			Festival of Flight	Web Site Sales	Sunbell	50.34
2020-07-21			None	In Store Sales	Bellen	46.37
2020-05-26			None	Web Site Sales	Carlota	23.79
2020-07-25			None	Web Site Sales	FlatTop	28.04
2020-05-21			None	Web Site Sales	Crested Beaut	251.68
2020-06-24			Festival of Flight	Web Site Sales	Quad	68.9
2020-09-10			None	In Store Sales	Doublers	160.76
2020-09-05			None	Web Site Sales	Sunshine	60.3
2020-06-27			Festival of Flight	Web Site Sales	Sunbell	50.12
2020-06-29			None	In Store Sales	FlatTop	470.63
2020-05-26			None	E-mail Coupon	Quad	68.45
2020-09-22			None	In Store Sales	Sunbell	342.28
2020-09-29			None	In Store Sales	Majectic Beaut	29.19
2020-07-08			None	In Store Sales	Bellen	46.92
2020-09-09			None	Web Site Sales	Bellen	23.44
2020-07-27			None	In Store Sales	Sunbell	48.2
2020-09-25			None	Web Site Sales	V-Rang	57.84
2020-05-15			None	Web Site Sales	Aspen	42.01
2020-09-06			None	Web Site Sales	Sunshine	40.05
2020-07-21			None	E-mail Coupon	Bellen	23.92
2020-07-24			None	E-mail Coupon	Carlota	92.84
2020-07-20			None	In Store Sales	Bellen	69.71
2020-09-23			None	E-mail Coupon	Quad	66.22
2020-07-01			None	In Store Sales	Sunbell	24.03
2020-07-08			None	Web Site Sales	FlatTop	55.43
2020-09-19			None	In Store Sales	Sunset	71.44
2020-05-05			None	In Store Sales	Carlota	22.34
2020-09-02			None	Web Site Sales	Carlota	46.86
2020-05-29			None	Web Site Sales	Majectic Beaut	203.87
2020-06-25			Festival of Flight	Web Site Sales	Bellen	66.62
2020-09-23			None	E-mail Coupon	FlatTop	27.14
2020-06-08			Festival of Flight	In Store Sales	Carlota	521.17
2020-05-15			None	In Store Sales	Sunshine	379.16
2020-05-01			None	In Store Sales	Sunshine	40.97
2020-09-10			None	Web Site Sales	Quad	102.52
2020-07-09			None	Web Site Sales	Quad	33.61
2020-09-24			None	Web Site Sales	Quad	99.11
2020-06-25			Festival of Flight	In Store Sales	Sunshine	57.17
2020-06-25			Festival of Flight	In Store Sales	Crested Beaut	24.05
2020-09-14			None	Web Site Sales	Bellen	69.4
2020-06-12			Festival of Flight	Web Site Sales	Quad	32.81
2020-07-20			None	In Store Sales	FlatTop	549.7
2020-06-01			Festival of Flight	In Store Sales	Sunset	45.9
2020-09-01			None	E-mail Coupon	Sunbell	23.95
2020-09-22			None	Web Site Sales	Bellen	69.17
2020-07-30			None	Web Site Sales	Bellen	46.31
2020-05-17			None	Web Site Sales	Sunbell	48.95
2020-05-24			None	In Store Sales	Quad	34.46
2020-09-09			None	Web Site Sales	Carlota	69.76
2020-07-10			None	In Store Sales	Carlota	66.64
2020-05-15			None	E-mail Coupon	Carlota	69.64
2020-09-07			None	Web Site Sales	Crested Beaut	69.89
2020-07-08			None	Web Site Sales	Sunshine	40.73
2020-07-21			None	Web Site Sales	Sunshine	20.56
2020-05-03			None	Web Site Sales	Aspen	57.98
2020-07-19			None	Web Site Sales	Sunbell	48.81
2020-05-05			None	Web Site Sales	Sunset	69
2020-09-11			None	In Store Sales	FlatTop	83.52
2020-09-03			None	In Store Sales	Bellen	69.74
2020-09-28			None	In Store Sales	Majectic Beaut	58.26
2020-07-19			None	Web Site Sales	Doublers	160.72
2020-05-20			None	In Store Sales	Quad	64.07
2020-07-01			None	Web Site Sales	Bellen	23.87
2020-09-09			None	In Store Sales	Sunshine	40.08
2020-09-11			None	Web Site Sales	FlatTop	83.29
2020-07-27			None	Web Site Sales	Sunset	424.31
2020-09-02			None	E-mail Coupon	Crested Beaut	24.82
2020-07-03			None	In Store Sales	Carlota	66.92
2020-06-11			Festival of Flight	Web Site Sales	Sunbell	48.4
2020-05-19			None	In Store Sales	FlatTop	83.96
2020-06-25			Festival of Flight	In Store Sales	Sunset	342.07
2020-06-16			Festival of Flight	Web Site Sales	Aspen	60.75
2020-07-11			None	In Store Sales	Carlota	46.51
2020-06-20			Festival of Flight	Web Site Sales	Bellen	161.34
2020-05-11			None	In Store Sales	Carlota	69.6
2020-09-22			None	Web Site Sales	Sunshine	20.67
2020-06-10			Festival of Flight	Web Site Sales	Bellen	46.53
2020-07-21			None	Web Site Sales	Sunbell	50.12
2020-09-12			None	In Store Sales	Bellen	44.17
2020-07-16			None	Web Site Sales	Carlota	69.99
2020-09-17			None	Web Site Sales	Carlota	46.7
2020-05-03			None	Web Site Sales	Majectic Beaut	29.46
2020-05-21			None	Web Site Sales	Sunset	268.61
2020-09-03			None	In Store Sales	Aspen	20.57
2020-09-24			None	E-mail Coupon	Quad	99.85
2020-06-07			Festival of Flight	In Store Sales	Sunset	71.95
2020-07-05			None	Web Site Sales	Sunbell	25.92
2020-06-14			Festival of Flight	Web Site Sales	Majectic Beaut	60.57
2020-07-13			None	Web Site Sales	Carlota	23.39
2020-09-20			None	Web Site Sales	Sunshine	40.57
2020-05-24			None	Web Site Sales	Carlota	44.26
2020-06-29			None	Web Site Sales	Quad	264.35
2020-06-17			Festival of Flight	Web Site Sales	Sunbell	24.55
2020-05-20			None	E-mail Coupon	Sunshine	20.68
2020-09-16			None	Web Site Sales	Quad	99.1
2020-09-24			None	Web Site Sales	Sunshine	20.56
2020-05-25			None	Web Site Sales	Bellen	46.58
2020-07-17			None	Web Site Sales	Quad	132.68
2020-09-17			None	Web Site Sales	Sunset	23.04
2020-07-26			None	Web Site Sales	Carlota	46.84
2020-09-02			None	Web Site Sales	Bellen	46.26
2020-09-12			None	In Store Sales	Sunshine	40.81
2020-09-21			None	E-mail Coupon	Sunshine	20.62
2020-06-22			Festival of Flight	Web Site Sales	Quad	165.67
2020-07-23			None	Web Site Sales	Quad	66.58
2020-07-29			None	Web Site Sales	Carlota	23.12
2020-09-29			None	Web Site Sales	Bellen	88.37
2020-07-11			None	Web Site Sales	Sunshine	60.87
2020-09-02			None	In Store Sales	Quad	99.74
2020-07-19			None	Web Site Sales	Sunbell	333.15
2020-09-08			None	Web Site Sales	Doublers	320.55
2020-05-19			None	E-mail Coupon	Crested Beaut	25.16
2020-05-20			None	In Store Sales	Sunbell	48.52
2020-05-16			None	In Store Sales	Doublers	160.85
2020-05-30			None	E-mail Coupon	Carlota	305.94
2020-05-26			None	In Store Sales	Quad	99.09
2020-05-04			None	Web Site Sales	Bellen	92.45
2020-09-11			None	Web Site Sales	FlatTop	55.43
2020-07-15			None	Web Site Sales	Sunshine	40.85
2020-07-26			None	In Store Sales	Sunshine	57.52
2020-06-09			Festival of Flight	E-mail Coupon	Quad	66.2
2020-07-22			None	Web Site Sales	Sunshine	40.28
2020-05-23			None	Web Site Sales	Bellen	46.16
2020-07-17			None	Web Site Sales	Sunshine	20.39
2020-07-26			None	Web Site Sales	Bellen	115.08
2020-09-17			None	Web Site Sales	Majectic Beaut	523.09
2020-09-12			None	Web Site Sales	Quad	102.47
2020-05-30			None	In Store Sales	Quad	66.22
2020-07-20			None	Web Site Sales	Quad	32.15
2020-09-25			None	E-mail Coupon	Bellen	69.68
2020-06-29			None	In Store Sales	Carlota	414.73
2020-07-22			None	In Store Sales	Aspen	40.52
2020-09-20			None	Web Site Sales	Quad	68.19
2020-09-07			None	Web Site Sales	Quad	102.82
2020-07-03			None	In Store Sales	Quad	132.81
2020-05-10			None	Web Site Sales	Sunbell	25.48
2020-05-08			None	Web Site Sales	Aspen	209.67
2020-05-11			None	In Store Sales	Crested Beaut	48.41
2020-07-04			None	Web Site Sales	Sunbell	50.92
2020-07-07			None	In Store Sales	Bellen	44.09
2020-05-14			None	Web Site Sales	Sunbell	48.09
2020-05-09			None	In Store Sales	Aspen	20.28
2020-09-15			None	In Store Sales	Sunbell	46.39
2020-06-15			Festival of Flight	In Store Sales	Sunshine	100.85
2020-09-02			None	Web Site Sales	Sunbell	48.79
2020-05-27			None	In Store Sales	Doublers	80.03
2020-05-12			None	E-mail Coupon	Quad	66.08
2020-05-08			None	Web Site Sales	Sunshine	60.99
2020-09-20			None	Web Site Sales	Sunshine	40.7
2020-05-19			None	Web Site Sales	Quad	64.47
2020-05-06			None	Web Site Sales	Sunshine	40.53
2020-05-27			None	In Store Sales	Carlota	69.3
2020-09-17			None	In Store Sales	Quad	102.29
2020-09-30			None	In Store Sales	Majectic Beaut	30.06
2020-06-26			Festival of Flight	Web Site Sales	Sunbell	48.72
2020-05-19			None	In Store Sales	Sunbell	72.92
2020-05-10			None	In Store Sales	Quad	32.84
2020-07-20			None	In Store Sales	Quad	690.21
2020-07-22			None	In Store Sales	Aspen	40.81
2020-09-07			None	In Store Sales	Bellen	23.83
2020-07-04			None	In Store Sales	Carlota	396.18
2020-06-25			Festival of Flight	Web Site Sales	Majectic Beaut	58.32
2020-05-24			None	Web Site Sales	Quad	306.2
2020-07-19			None	E-mail Coupon	Majectic Beaut	60.41
2020-05-25			None	In Store Sales	Majectic Beaut	112.68
2020-05-15			None	In Store Sales	Quad	33.77
2020-07-19			None	In Store Sales	Carlota	22.31
2020-05-05			None	In Store Sales	V-Rang	54.75
2020-06-30			None	In Store Sales	Bellen	46.83
2020-07-05			None	Web Site Sales	Sunset	24.75
2020-07-25			None	Web Site Sales	Sunshine	20.83
2020-09-05			None	In Store Sales	Quad	238.6
2020-07-12			None	Web Site Sales	Bellen	23.1
2020-05-30			None	In Store Sales	Quad	66.33
2020-07-27			None	Web Site Sales	Quad	66.2
2020-05-05			None	In Store Sales	Quad	68.71
2020-05-22			None	Web Site Sales	Sunshine	38.84
2020-07-09			None	Web Site Sales	Carlota	69.08
2020-07-07			None	Web Site Sales	Bellen	23.14
2020-05-25			None	E-mail Coupon	Quad	68.21
2020-09-09			None	E-mail Coupon	Aspen	105.14
2020-06-29			None	In Store Sales	Sunset	188.73
2020-09-10			None	In Store Sales	Carlota	69.1
2020-07-15			None	In Store Sales	Crested Beaut	240.41
2020-05-06			None	In Store Sales	Carlota	69.98
2020-09-22			None	In Store Sales	FlatTop	55.3
2020-05-03			None	Web Site Sales	Quad	99.67
2020-05-12			None	Web Site Sales	Crested Beaut	96.11
2020-07-06			None	In Store Sales	Doublers	160.15
2020-09-26			None	In Store Sales	Quad	66.93
2020-07-04			None	In Store Sales	Carlota	66.66
2020-05-04			None	In Store Sales	Bellen	44.15
2020-07-13			None	In Store Sales	Crested Beaut	72.98
2020-05-21			None	E-mail Coupon	Sunshine	40.36
2020-09-22			None	Web Site Sales	Aspen	57.84
2020-07-09			None	In Store Sales	Carlota	392.42
2020-09-26			None	In Store Sales	Bellen	44.32
2020-05-11			None	Web Site Sales	Aspen	63.02
2020-09-14			None	Web Site Sales	Sunbell	48.15
2020-05-18			None	In Store Sales	Sunshine	20.24
2020-09-19			None	Web Site Sales	Doublers	228.86
2020-09-12			None	In Store Sales	Carlota	69.02
2020-06-03			Festival of Flight	Web Site Sales	Doublers	312.94
2020-07-07			None	Web Site Sales	Doublers	240.7
2020-08-02			Fall Kite Event	Web Site Sales	Quad	517.89
2020-09-26			None	Web Site Sales	Sunshine	80.27
2020-07-13			None	Web Site Sales	Sunbell	75.09
2020-05-07			None	Web Site Sales	Crested Beaut	23.38
2020-05-14			None	Web Site Sales	Carlota	69.19
2020-09-27			None	In Store Sales	V-Rang	36.34
2020-07-17			None	Web Site Sales	Carlota	69.68
2020-07-21			None	In Store Sales	Carlota	22.86
2020-07-06			None	Web Site Sales	Bellen	66.75
2020-07-03			None	Web Site Sales	Quad	66.9
2020-07-04			None	Web Site Sales	Sunshine	40.07
2020-09-22			None	Web Site Sales	Sunshine	40.83
2020-07-17			None	In Store Sales	Carlota	46.27
2020-07-27			None	Web Site Sales	Bellen	66.38
2020-07-21			None	Web Site Sales	Crested Beaut	72.74
2020-07-08			None	Web Site Sales	Bellen	69.55
2020-06-30			None	In Store Sales	Majectic Beaut	87.58
2020-07-02			None	E-mail Coupon	Quad	32.92
2020-07-10			None	In Store Sales	Quad	376.52
2020-07-01			None	In Store Sales	Sunset	71.94
2020-07-20			None	In Store Sales	Aspen	20.22
2020-09-14			None	In Store Sales	Aspen	40.24
2020-09-11			None	In Store Sales	Quad	752.68
2020-08-19			Fall Kite Event	In Store Sales	Sunset	71.8
2020-09-14			None	E-mail Coupon	Carlota	69.5
2020-09-14			None	Web Site Sales	Quad	66.13
2020-06-03			Festival of Flight	E-mail Coupon	Aspen	40.44
2020-09-26			None	In Store Sales	Bellen	46.98
2020-05-23			None	E-mail Coupon	Sunshine	60.45
2020-09-21			None	Web Site Sales	Sunshine	40.98
2020-07-09			None	In Store Sales	Carlota	22.27
2020-05-21			None	In Store Sales	Bellen	46.21
2020-05-13			None	Web Site Sales	Quad	99.51
2020-07-28			None	E-mail Coupon	Bellen	44.01
2020-09-05			None	Web Site Sales	Quad	68.2
2020-09-03			None	Web Site Sales	Bellen	46.07
2020-08-15			Fall Kite Event	Web Site Sales	Sunset	45.82
2020-09-29			None	In Store Sales	Quad	34.48
2020-07-18			None	In Store Sales	Crested Beaut	72.19
2020-07-24			None	Web Site Sales	Sunbell	48.64
2020-05-17			None	Web Site Sales	Carlota	46.55
2020-05-08			None	In Store Sales	Majectic Beaut	84.64
2020-06-12			Festival of Flight	In Store Sales	Sunset	47.68
2020-09-27			None	Web Site Sales	Majectic Beaut	30.27
2020-09-09			None	In Store Sales	Quad	33.62
2020-07-02			None	In Store Sales	Sunbell	50.44
2020-07-29			None	In Store Sales	Bellen	46.92
2020-08-16			Fall Kite Event	Web Site Sales	Sunbell	24.56
2020-05-04			None	Web Site Sales	Carlota	23.52
2020-05-24			None	In Store Sales	Bellen	23.56
2020-07-04			None	Web Site Sales	Sunbell	75.4
2020-09-13			None	In Store Sales	Carlota	69.72
2020-05-21			None	E-mail Coupon	Bellen	23.47
2020-05-17			None	In Store Sales	Bellen	66.61
2020-09-27			None	Web Site Sales	Quad	33.54
2020-05-21			None	In Store Sales	Carlota	46.65
2020-09-13			None	Web Site Sales	Bellen	22.25
2020-09-07			None	In Store Sales	Quad	68.05
2020-09-21			None	Web Site Sales	Sunshine	19.8
2020-07-09			None	In Store Sales	Sunset	469.48
2020-05-24			None	Web Site Sales	Carlota	44.33
2020-05-14			None	In Store Sales	Sunset	94.43
2020-06-03			Festival of Flight	Web Site Sales	Sunshine	57.94
2020-08-21			Fall Kite Event	Web Site Sales	Quad	66.77
2020-09-28			None	Web Site Sales	Sunshine	20.13
2020-05-08			None	Web Site Sales	Carlota	22.24
2020-05-10			None	Web Site Sales	Quad	102.35
2020-05-08			None	In Store Sales	FlatTop	55.22
2020-06-04			Festival of Flight	Web Site Sales	Crested Beaut	96.74
2020-06-23			Festival of Flight	Web Site Sales	Majectic Beaut	60.84
2020-09-02			None	Web Site Sales	Aspen	20.24
2020-09-03			None	Web Site Sales	Sunshine	80.64
2020-07-24			None	Web Site Sales	V-Rang	36.38
2020-05-03			None	Web Site Sales	Bellen	46.22
2020-07-16			None	In Store Sales	Aspen	20.57
2020-09-18			None	E-mail Coupon	Carlota	23.46
2020-07-04			None	Web Site Sales	Sunshine	80.11
2020-07-26			None	In Store Sales	Aspen	259.17
2020-09-08			None	In Store Sales	Majectic Beaut	689.96
2020-07-09			None	Web Site Sales	Sunshine	38.29
2020-09-15			None	In Store Sales	Majectic Beaut	58.17
2020-09-26			None	Web Site Sales	Carlota	46.08
2020-09-06			None	E-mail Coupon	Sunset	71.39
2020-09-14			None	In Store Sales	Sunshine	40.94
2020-05-17			None	Web Site Sales	Aspen	20.18
2020-07-06			None	In Store Sales	Bellen	46.6
2020-05-14			None	In Store Sales	Carlota	44.6
2020-09-10			None	In Store Sales	V-Rang	36.26
2020-07-22			None	Web Site Sales	Quad	32.7
2020-05-23			None	Web Site Sales	Sunshine	60.81
2020-07-15			None	E-mail Coupon	Carlota	46.32
2020-09-08			None	E-mail Coupon	FlatTop	53.81
2020-07-26			None	In Store Sales	Majectic Beaut	58.22
2020-09-09			None	In Store Sales	Bellen	44.53
2020-07-31			None	Web Site Sales	Bellen	23.56
2020-05-06			None	In Store Sales	Bellen	44.73
2020-07-14			None	In Store Sales	Aspen	42.31
2020-09-25			None	Web Site Sales	Crested Beaut	75.73
2020-05-29			None	Web Site Sales	Sunbell	46.86
2020-09-03			None	In Store Sales	Quad	66.92
2020-05-20			None	E-mail Coupon	Crested Beaut	100.5
2020-06-26			Festival of Flight	Web Site Sales	Quad	33.92
2020-06-04			Festival of Flight	Web Site Sales	Sunbell	46.2
2020-07-28			None	Web Site Sales	Quad	439.53
2020-07-29			None	Web Site Sales	Bellen	46.4
2020-05-14			None	In Store Sales	Carlota	46.77
2020-09-04			None	Web Site Sales	Quad	66.38
2020-05-06			None	In Store Sales	Carlota	23.53
2020-07-02			None	E-mail Coupon	Sunshine	40.34
2020-09-30			None	In Store Sales	Crested Beaut	72.25
2020-05-16			None	In Store Sales	Majectic Beaut	87.66
2020-06-05			Festival of Flight	E-mail Coupon	Sunshine	20.61
2020-07-30			None	In Store Sales	Sunbell	24.4
2020-07-03			None	In Store Sales	Doublers	78.81
2020-09-12			None	Web Site Sales	Aspen	60.63
2020-05-14			None	Web Site Sales	Bellen	69.73
2020-05-19			None	Web Site Sales	Crested Beaut	46.04
2020-07-06			None	Web Site Sales	Bellen	23.51
2020-05-09			None	Web Site Sales	Carlota	23.36
2020-07-11			None	Web Site Sales	Bellen	46.86
2020-05-25			None	In Store Sales	Carlota	305.1
2020-05-23			None	E-mail Coupon	FlatTop	53.48
2020-08-15			Fall Kite Event	E-mail Coupon	Bellen	23.98
2020-05-24			None	Web Site Sales	Bellen	44.34
2020-09-10			None	In Store Sales	Aspen	21.09
2020-09-26			None	E-mail Coupon	Quad	33.71
2020-07-12			None	Web Site Sales	Bellen	23.99
2020-09-29			None	In Store Sales	Carlota	46.66
2020-05-17			None	Web Site Sales	Sunshine	322.34
2020-09-11			None	Web Site Sales	Bellen	46.25
2020-05-03			None	In Store Sales	Aspen	76.62
2020-07-25			None	In Store Sales	Quad	99.25
2020-09-17			None	E-mail Coupon	Carlota	44.92
2020-05-12			None	Web Site Sales	Sunshine	60.06
2020-09-08			None	In Store Sales	Crested Beaut	23.41
2020-07-15			None	In Store Sales	Doublers	80.06
2020-07-06			None	Web Site Sales	Sunshine	284.83
2020-09-02			None	Web Site Sales	Sunshine	57.34
2020-07-08			None	In Store Sales	Doublers	234.13
2020-06-12			Festival of Flight	E-mail Coupon	Crested Beaut	25.85
2020-05-09			None	Web Site Sales	Sunshine	20.56
2020-08-22			Fall Kite Event	E-mail Coupon	Crested Beaut	48.95
2020-07-28			None	In Store Sales	Bellen	23.31
2020-07-31			None	Web Site Sales	Sunshine	57.41
2020-09-20			None	In Store Sales	Quad	66.98
2020-08-28			Fall Kite Event	Web Site Sales	Doublers	228.46
2020-08-27			Fall Kite Event	In Store Sales	Majectic Beaut	90.56
2020-05-02			None	Web Site Sales	Bellen	23.8
2020-07-29			None	In Store Sales	Sunset	514.68
2020-07-03			None	Web Site Sales	Quad	64.8
2020-08-21			Fall Kite Event	Web Site Sales	Majectic Beaut	28.13
2020-05-28			None	In Store Sales	Bellen	69.22
2020-09-17			None	Web Site Sales	V-Rang	36.48
2020-09-13			None	E-mail Coupon	Sunshine	20.96
2020-09-10			None	In Store Sales	Majectic Beaut	58.88
2020-09-17			None	E-mail Coupon	Sunshine	160.43
2020-08-10			Fall Kite Event	In Store Sales	Crested Beaut	25.98
2020-09-15			None	Web Site Sales	Quad	99.98
2020-06-20			Festival of Flight	Web Site Sales	Bellen	46.43
2020-07-12			None	In Store Sales	Majectic Beaut	84.94
2020-08-15			Fall Kite Event	Web Site Sales	Bellen	115.62
2020-05-17			None	Web Site Sales	Sunbell	502.27
2020-07-27			None	E-mail Coupon	Aspen	40.02
2020-06-07			Festival of Flight	Web Site Sales	Bellen	230.14
2020-09-21			None	In Store Sales	Sunbell	72.38
2020-05-30			None	Web Site Sales	Sunbell	48.99
2020-07-11			None	Web Site Sales	Sunshine	20.76
2020-08-11			Fall Kite Event	E-mail Coupon	Doublers	240.06
2020-05-01			None	In Store Sales	V-Rang	38.48
2020-07-20			None	In Store Sales	Doublers	835.82
2020-05-20			None	In Store Sales	Majectic Beaut	87.36
2020-09-12			None	Web Site Sales	Sunshine	40.81
2020-05-22			None	In Store Sales	Sunshine	60.59
2020-07-13			None	In Store Sales	Aspen	40.68
2020-07-03			None	Web Site Sales	Carlota	305.94
2020-09-25			None	Web Site Sales	Sunshine	20.02
2020-07-09			None	In Store Sales	Quad	99.72
2020-08-19			Fall Kite Event	In Store Sales	Quad	34.61
2020-09-23			None	Web Site Sales	Bellen	69.51
2020-06-12			Festival of Flight	Web Site Sales	Sunshine	60.19
2020-05-02			None	Web Site Sales	Carlota	23.83
2020-07-13			None	In Store Sales	Sunset	47.92
2020-07-28			None	Web Site Sales	Aspen	43
2020-05-22			None	In Store Sales	Sunbell	48.21
2020-05-20			None	Web Site Sales	Crested Beaut	50
2020-05-09			None	In Store Sales	Quad	34.18
2020-08-08			Fall Kite Event	In Store Sales	Crested Beaut	437.31
2020-07-27			None	Web Site Sales	Carlota	46.88
2020-08-31			None	In Store Sales	Quad	66.06
2020-09-27			None	Web Site Sales	Aspen	76.69
2020-09-05			None	Web Site Sales	Bellen	69.82
2020-05-13			None	In Store Sales	Carlota	23.59
2020-07-02			None	Web Site Sales	Sunset	47.46
2020-05-07			None	Web Site Sales	Sunset	71.69
2020-09-14			None	Web Site Sales	Carlota	23.06
2020-07-25			None	E-mail Coupon	Majectic Beaut	29.59
2020-05-28			None	Web Site Sales	Quad	132.81
2020-06-23			Festival of Flight	Web Site Sales	Bellen	22.05
2020-05-23			None	Web Site Sales	Majectic Beaut	240.22
2020-07-12			None	Web Site Sales	Bellen	46.7
2020-09-15			None	In Store Sales	Sunbell	50.57
2020-07-21			None	In Store Sales	Quad	34
2020-05-27			None	In Store Sales	Sunbell	69.59
2020-06-17			Festival of Flight	Web Site Sales	Quad	66.79
2020-08-09			Fall Kite Event	In Store Sales	Sunbell	75.06
2020-09-15			None	In Store Sales	Sunset	491.22
2020-09-19			None	Web Site Sales	Sunshine	60.87
2020-07-15			None	In Store Sales	Quad	33.4
2020-08-18			Fall Kite Event	In Store Sales	Sunshine	20.89
2020-06-21			Festival of Flight	In Store Sales	Sunshine	40.18
2020-07-11			None	In Store Sales	Sunset	47.46
2020-05-26			None	Web Site Sales	Sunshine	80.66
2020-09-08			None	In Store Sales	Quad	102.72
2020-06-27			Festival of Flight	In Store Sales	Doublers	240.83
2020-09-21			None	In Store Sales	Aspen	60.3
2020-09-10			None	Web Site Sales	Quad	33.57
2020-06-14			Festival of Flight	In Store Sales	Crested Beaut	25.77
2020-08-10			Fall Kite Event	In Store Sales	Quad	99.44
2020-06-21			Festival of Flight	Web Site Sales	Aspen	63.34
2020-09-12			None	In Store Sales	Quad	66.94
2020-07-01			None	Web Site Sales	Carlota	22.64
2020-07-05			None	Web Site Sales	Majectic Beaut	87.38
2020-09-04			None	Web Site Sales	Quad	102.43
2020-05-13			None	E-mail Coupon	Bellen	66.51
2020-07-19			None	In Store Sales	Sunbell	69.45
2020-09-17			None	Web Site Sales	Sunbell	524.81
2020-07-15			None	In Store Sales	Bellen	46.16
2020-05-19			None	In Store Sales	FlatTop	106.2
2020-09-01			None	Web Site Sales	V-Rang	36.4
2020-08-30			None	Web Site Sales	Quad	96.64
2020-05-08			None	In Store Sales	Bellen	46.62
2020-09-22			None	In Store Sales	FlatTop	27.67
2020-07-11			None	E-mail Coupon	Sunshine	417.93
2020-05-04			None	Web Site Sales	Quad	752.78
2020-09-21			None	Web Site Sales	Crested Beaut	96.46
2020-05-26			None	Web Site Sales	Bellen	240.59
2020-05-21			None	Web Site Sales	V-Rang	36.96
2020-07-24			None	In Store Sales	Quad	68.39
2020-08-19			Fall Kite Event	Web Site Sales	Sunbell	48.74
2020-06-10			Festival of Flight	In Store Sales	FlatTop	28.24
2020-07-19			None	In Store Sales	Sunbell	72.17
2020-05-17			None	Web Site Sales	Sunbell	69.05
2020-06-05			Festival of Flight	E-mail Coupon	Crested Beaut	46.14
2020-05-20			None	In Store Sales	Carlota	46.27
2020-08-29			Fall Kite Event	E-mail Coupon	Bellen	138
2020-06-06			Festival of Flight	Web Site Sales	Aspen	57.66
2020-07-04			None	Web Site Sales	V-Rang	36.86
2020-07-26			None	In Store Sales	Majectic Beaut	60.83
2020-05-14			None	Web Site Sales	Bellen	88.62
2020-09-20			None	In Store Sales	FlatTop	80.28
2020-07-23			None	In Store Sales	Doublers	160.04
2020-09-06			None	In Store Sales	Sunshine	40.8
2020-05-03			None	In Store Sales	Sunshine	20.78
2020-07-13			None	Web Site Sales	Bellen	46.05
2020-06-24			Festival of Flight	Web Site Sales	V-Rang	36.22
2020-07-10			None	E-mail Coupon	Sunset	71.19
2020-08-12			Fall Kite Event	E-mail Coupon	Sunbell	96.89
2020-09-26			None	In Store Sales	Sunset	23.53
2020-09-03			None	In Store Sales	Sunbell	75.36
2020-06-02			Festival of Flight	In Store Sales	Sunbell	23.64
2020-06-01			Festival of Flight	Web Site Sales	Aspen	60.45
2020-07-31			None	In Store Sales	Sunbell	96.19
2020-05-30			None	Web Site Sales	Sunbell	48.53
2020-08-05			Fall Kite Event	In Store Sales	Quad	34.71
2020-05-30			None	In Store Sales	Bellen	23.88
2020-09-05			None	Web Site Sales	Majectic Beaut	58.52
2020-05-29			None	E-mail Coupon	Crested Beaut	69.96
2020-07-24			None	Web Site Sales	Quad	33.8
2020-08-09			Fall Kite Event	Web Site Sales	Crested Beaut	48.35
2020-09-19			None	In Store Sales	FlatTop	83
2020-08-08			Fall Kite Event	E-mail Coupon	V-Rang	54.35
2020-05-28			None	E-mail Coupon	Crested Beaut	48.61
2020-09-16			None	In Store Sales	Quad	132.64
2020-05-19			None	In Store Sales	Carlota	46.88
2020-06-29			None	In Store Sales	Bellen	46.66
2020-05-05			None	E-mail Coupon	Carlota	545.7
2020-06-18			Festival of Flight	Web Site Sales	FlatTop	28.19
2020-06-01			Festival of Flight	Web Site Sales	Sunshine	40.29
2020-08-06			Fall Kite Event	E-mail Coupon	Bellen	46.62
2020-05-03			None	Web Site Sales	Bellen	46.28
2020-06-28			None	Web Site Sales	Bellen	69.58
2020-06-20			Festival of Flight	Web Site Sales	Quad	627.63
2020-08-15			Fall Kite Event	In Store Sales	FlatTop	83.33
2020-08-17			Fall Kite Event	In Store Sales	Carlota	46.82
2020-06-29			None	Web Site Sales	V-Rang	38.65
2020-08-09			Fall Kite Event	E-mail Coupon	Sunshine	20.72
2020-06-15			Festival of Flight	In Store Sales	Quad	102.38
2020-08-11			Fall Kite Event	In Store Sales	Aspen	38.95
2020-06-16			Festival of Flight	E-mail Coupon	Sunshine	20.47
2020-08-08			Fall Kite Event	E-mail Coupon	Doublers	80.2
2020-06-30			None	Web Site Sales	Sunbell	24.61
2020-07-28			None	Web Site Sales	Quad	34
2020-08-09			Fall Kite Event	Web Site Sales	Sunset	257.96
2020-08-22			Fall Kite Event	In Store Sales	Sunbell	46.72
2020-06-24			Festival of Flight	In Store Sales	Sunbell	92.32
2020-06-29			None	Web Site Sales	Carlota	23.59
2020-08-27			Fall Kite Event	Web Site Sales	Carlota	46.53
2020-06-10			Festival of Flight	Web Site Sales	Quad	33.48
2020-07-14			None	Web Site Sales	Quad	66.91
2020-08-17			Fall Kite Event	E-mail Coupon	Majectic Beaut	28.88
2020-08-08			Fall Kite Event	E-mail Coupon	Sunshine	140.44
2020-06-11			Festival of Flight	Web Site Sales	Bellen	46.52
2020-05-25			None	In Store Sales	Quad	64.35
2020-06-11			Festival of Flight	Web Site Sales	Carlota	44.39
2020-06-19			Festival of Flight	Web Site Sales	Sunshine	40.24
2020-06-07			Festival of Flight	Web Site Sales	Carlota	46.48
2020-08-24			Fall Kite Event	Web Site Sales	Carlota	23.51
2020-06-12			Festival of Flight	In Store Sales	Sunset	24.16
2020-08-19			Fall Kite Event	Web Site Sales	Bellen	92.9
2020-08-08			Fall Kite Event	In Store Sales	Majectic Beaut	87.47
2020-08-24			Fall Kite Event	Web Site Sales	Bellen	69.98
2020-08-03			Fall Kite Event	Web Site Sales	Bellen	44.33
2020-08-31			None	In Store Sales	Quad	33.23
2020-08-16			Fall Kite Event	E-mail Coupon	Sunbell	72.45
2020-08-05			Fall Kite Event	Web Site Sales	FlatTop	27.59
2020-05-12			None	Web Site Sales	Sunshine	20.89
2020-06-19			Festival of Flight	Web Site Sales	Majectic Beaut	58.18
2020-06-11			Festival of Flight	Web Site Sales	Carlota	66.66
2020-06-17			Festival of Flight	Web Site Sales	Bellen	22.94
2020-06-15			Festival of Flight	E-mail Coupon	Quad	68.36
2020-08-15			Fall Kite Event	In Store Sales	Bellen	66.33
2020-06-16			Festival of Flight	Web Site Sales	Crested Beaut	50.75
2020-09-21			None	E-mail Coupon	Doublers	240.16
2020-06-27			Festival of Flight	Web Site Sales	Quad	68.36
2020-06-16			Festival of Flight	Web Site Sales	Doublers	80.54
2020-05-17			None	Web Site Sales	Carlota	480.07
2020-08-29			Fall Kite Event	Web Site Sales	Sunset	47.92
2020-09-25			None	Web Site Sales	Aspen	42.83
2020-05-10			None	In Store Sales	Aspen	63.41
2020-09-14			None	E-mail Coupon	Crested Beaut	50.04
2020-06-28			None	In Store Sales	Bellen	23.64
2020-08-04			Fall Kite Event	In Store Sales	Carlota	69.42
2020-08-06			Fall Kite Event	In Store Sales	Sunset	71.85
2020-08-05			Fall Kite Event	In Store Sales	Majectic Beaut	29.11
2020-06-28			None	Web Site Sales	Quad	730.52
2020-08-29			Fall Kite Event	In Store Sales	Majectic Beaut	28.97
2020-08-04			Fall Kite Event	In Store Sales	Crested Beaut	25.81
2020-06-28			None	In Store Sales	Bellen	46.21
2020-08-18			Fall Kite Event	In Store Sales	Carlota	22.56
2020-09-03			None	Web Site Sales	Sunset	47.7
2020-06-03			Festival of Flight	In Store Sales	Sunshine	60.03
2020-09-05			None	E-mail Coupon	Doublers	152.44
2020-08-17			Fall Kite Event	In Store Sales	FlatTop	83.66
2020-06-19			Festival of Flight	Web Site Sales	Bellen	69.75
2020-06-26			Festival of Flight	Web Site Sales	Majectic Beaut	58.01
2020-08-19			Fall Kite Event	In Store Sales	V-Rang	54.43
2020-06-16			Festival of Flight	Web Site Sales	Doublers	560.17
2020-06-18			Festival of Flight	Web Site Sales	Sunbell	50.24
2020-08-26			Fall Kite Event	Web Site Sales	Sunshine	60.84
2020-07-30			None	Web Site Sales	Bellen	46.18
2020-05-04			None	Web Site Sales	Quad	66.7
2020-06-07			Festival of Flight	In Store Sales	Crested Beaut	48.49
2020-06-16			Festival of Flight	In Store Sales	Crested Beaut	48.61
2020-08-06			Fall Kite Event	Web Site Sales	Carlota	46.2
2020-07-26			None	E-mail Coupon	Bellen	46.18
2020-06-09			Festival of Flight	In Store Sales	V-Rang	18.51
2020-06-23			Festival of Flight	In Store Sales	Sunshine	80.19
2020-06-07			Festival of Flight	Web Site Sales	Bellen	46.62
2020-05-28			None	E-mail Coupon	Quad	99.65
2020-06-06			Festival of Flight	Web Site Sales	Crested Beaut	72.4
2020-06-18			Festival of Flight	Web Site Sales	Sunshine	40.07
2020-08-10			Fall Kite Event	E-mail Coupon	Quad	33.15
2020-06-09			Festival of Flight	Web Site Sales	Sunshine	341.85
2020-06-10			Festival of Flight	Web Site Sales	Crested Beaut	25.99
2020-08-24			Fall Kite Event	Web Site Sales	Quad	102.05
2020-08-25			Fall Kite Event	In Store Sales	Aspen	38.32
2020-06-18			Festival of Flight	Web Site Sales	Aspen	38.05
2020-08-01			None	In Store Sales	Sunshine	60.4
2020-09-22			None	Web Site Sales	Quad	658.76
2020-08-22			Fall Kite Event	E-mail Coupon	Crested Beaut	69.87
2020-07-03			None	Web Site Sales	Crested Beaut	48.31
2020-08-25			Fall Kite Event	E-mail Coupon	Bellen	22.16
2020-06-21			Festival of Flight	Web Site Sales	Sunshine	40.51
2020-07-26			None	In Store Sales	Sunset	47.54
2020-08-16			Fall Kite Event	Web Site Sales	Doublers	228.22
2020-06-10			Festival of Flight	In Store Sales	Carlota	46.88
2020-06-22			Festival of Flight	In Store Sales	Carlota	46.62
2020-06-30			None	In Store Sales	Majectic Beaut	120.75
2020-08-17			Fall Kite Event	Web Site Sales	Crested Beaut	48.98
2020-06-04			Festival of Flight	Web Site Sales	Bellen	88.69
2020-08-09			Fall Kite Event	Web Site Sales	Majectic Beaut	60.87
2020-09-16			None	In Store Sales	FlatTop	83.02
2020-08-16			Fall Kite Event	Web Site Sales	Carlota	46.55
2020-08-24			Fall Kite Event	In Store Sales	Sunbell	25.85
2020-06-27			Festival of Flight	Web Site Sales	Crested Beaut	50.52
2020-09-12			None	Web Site Sales	Sunbell	46.22
2020-06-03			Festival of Flight	Web Site Sales	V-Rang	76.9
2020-06-27			Festival of Flight	In Store Sales	Carlota	69.39
2020-07-12			None	Web Site Sales	Quad	99.97
2020-08-27			Fall Kite Event	In Store Sales	Quad	33.41
2020-05-06			None	Web Site Sales	Crested Beaut	25.69
2020-08-26			Fall Kite Event	In Store Sales	Carlota	46.99
2020-06-09			Festival of Flight	Web Site Sales	Carlota	69.58
2020-09-12			None	Web Site Sales	Sunset	71.84
2020-06-19			Festival of Flight	Web Site Sales	Quad	64.54
2020-08-16			Fall Kite Event	In Store Sales	Aspen	40.4
2020-06-27			Festival of Flight	Web Site Sales	Majectic Beaut	87.19
2020-06-02			Festival of Flight	E-mail Coupon	Bellen	138.06
2020-06-08			Festival of Flight	Web Site Sales	Sunbell	46.49
2020-06-13			Festival of Flight	Web Site Sales	Majectic Beaut	523.74
2020-08-28			Fall Kite Event	Web Site Sales	Sunbell	72.96
2020-06-02			Festival of Flight	Web Site Sales	Carlota	92.47
2020-07-20			None	In Store Sales	Sunshine	60.43
2020-08-09			Fall Kite Event	In Store Sales	Quad	68.59
2020-06-27			Festival of Flight	In Store Sales	Quad	99.67
2020-08-23			Fall Kite Event	In Store Sales	Sunshine	60.42
2020-06-11			Festival of Flight	Web Site Sales	V-Rang	38.79
2020-05-28			None	In Store Sales	Quad	96.96
2020-08-09			Fall Kite Event	E-mail Coupon	Sunset	24.33
2020-06-01			Festival of Flight	Web Site Sales	Quad	99.83
2020-09-15			None	In Store Sales	Sunbell	46.16
2020-06-27			Festival of Flight	Web Site Sales	Sunshine	20.58
2020-05-19			None	Web Site Sales	Carlota	46.83
2020-08-30			None	In Store Sales	Quad	34.01
2020-07-24			None	Web Site Sales	Sunshine	38.77
2020-06-01			Festival of Flight	In Store Sales	Doublers	240.01
2020-07-05			None	Web Site Sales	Carlota	69.02
2020-08-22			Fall Kite Event	E-mail Coupon	Bellen	69.27
2020-08-29			Fall Kite Event	In Store Sales	Sunbell	48.69
2020-06-29			None	Web Site Sales	Bellen	46.82
2020-06-05			Festival of Flight	In Store Sales	Crested Beaut	48.67
2020-06-28			None	Web Site Sales	Bellen	23.27
2020-05-27			None	Web Site Sales	Carlota	46.34
2020-06-20			Festival of Flight	Web Site Sales	Majectic Beaut	58.48
2020-06-22			Festival of Flight	Web Site Sales	Carlota	69.2
2020-08-03			Fall Kite Event	In Store Sales	Aspen	60.72
2020-06-09			Festival of Flight	In Store Sales	Aspen	57.43
2020-06-07			Festival of Flight	Web Site Sales	Crested Beaut	24.24
2020-06-13			Festival of Flight	Web Site Sales	FlatTop	186.62
2020-06-21			Festival of Flight	In Store Sales	Quad	68.37
2020-08-02			Fall Kite Event	In Store Sales	Quad	34
2020-06-03			Festival of Flight	In Store Sales	Quad	32.36
2020-08-17			Fall Kite Event	In Store Sales	Sunbell	50.58
2020-06-27			Festival of Flight	Web Site Sales	Sunset	47.05
2020-06-24			Festival of Flight	In Store Sales	Bellen	44.27
2020-08-05			Fall Kite Event	In Store Sales	Carlota	46.29
2020-08-22			Fall Kite Event	Web Site Sales	Sunshine	57.74
2020-07-18			None	E-mail Coupon	Carlota	23.79
2020-09-04			None	Web Site Sales	Sunshine	180.32
2020-08-10			Fall Kite Event	In Store Sales	Carlota	46.6
2020-06-27			Festival of Flight	E-mail Coupon	Carlota	46.1
2020-08-06			Fall Kite Event	In Store Sales	Majectic Beaut	87.68
2020-06-15			Festival of Flight	Web Site Sales	Sunset	71.77
2020-06-16			Festival of Flight	In Store Sales	Quad	33.56
2020-08-22			Fall Kite Event	In Store Sales	Carlota	23.32
2020-09-01			None	Web Site Sales	FlatTop	601.94
2020-05-10			None	Web Site Sales	Sunset	47.03
2020-05-22			None	In Store Sales	Quad	68.08
2020-06-19			Festival of Flight	Web Site Sales	Bellen	46.84
2020-08-05			Fall Kite Event	In Store Sales	Bellen	46.09
2020-09-16			None	Web Site Sales	Carlota	23.83
2020-08-24			Fall Kite Event	In Store Sales	Aspen	20.62
2020-06-14			Festival of Flight	Web Site Sales	Bellen	44.56
2020-08-10			Fall Kite Event	In Store Sales	Bellen	23.19
2020-06-03			Festival of Flight	Web Site Sales	Quad	102.57
2020-05-30			None	In Store Sales	Doublers	240.23
2020-06-25			Festival of Flight	Web Site Sales	V-Rang	90.23
2020-06-29			None	Web Site Sales	Quad	160.67
2020-06-29			None	Web Site Sales	Carlota	66.97
2020-08-02			Fall Kite Event	In Store Sales	Bellen	44.78
2020-06-15			Festival of Flight	Web Site Sales	Bellen	66.76
2020-08-31			None	In Store Sales	V-Rang	57.57
2020-05-15			None	Web Site Sales	Quad	66.97
2020-06-15			Festival of Flight	Web Site Sales	Bellen	46.34
2020-06-18			Festival of Flight	E-mail Coupon	Carlota	23.29
2020-09-06			None	In Store Sales	Carlota	69.88
2020-08-14			Fall Kite Event	Web Site Sales	Majectic Beaut	90.6
2020-06-30			None	Web Site Sales	Quad	99.45
2020-08-09			Fall Kite Event	Web Site Sales	Sunbell	25.17
2020-07-30			None	Web Site Sales	Aspen	63.34
2020-06-07			Festival of Flight	In Store Sales	Carlota	327.91
2020-09-01			None	Web Site Sales	Sunset	24.88
2020-06-14			Festival of Flight	Web Site Sales	Sunshine	19.38
2020-06-22			Festival of Flight	Web Site Sales	Quad	68.08
2020-08-18			Fall Kite Event	Web Site Sales	Bellen	69.07
2020-08-06			Fall Kite Event	In Store Sales	Aspen	40.74
2020-08-06			Fall Kite Event	Web Site Sales	Crested Beaut	24.62
2020-06-24			Festival of Flight	In Store Sales	Quad	66.91
2020-06-05			Festival of Flight	Web Site Sales	Sunset	24.76
2020-08-17			Fall Kite Event	In Store Sales	Quad	102.34
2020-06-12			Festival of Flight	Web Site Sales	Aspen	80.86
2020-06-30			None	E-mail Coupon	Carlota	23.85
2020-06-22			Festival of Flight	Web Site Sales	Carlota	22.97
2020-06-26			Festival of Flight	In Store Sales	Crested Beaut	46.75
2020-06-28			None	Web Site Sales	Carlota	44.82
2020-08-26			Fall Kite Event	In Store Sales	Quad	99.42
2020-08-25			Fall Kite Event	Web Site Sales	Sunshine	38.57
2020-06-08			Festival of Flight	Web Site Sales	Carlota	176.27
2020-06-20			Festival of Flight	Web Site Sales	Quad	192.39
2020-06-29			None	Web Site Sales	Doublers	152.17
2020-08-05			Fall Kite Event	E-mail Coupon	Carlota	46.58
2020-06-16			Festival of Flight	Web Site Sales	Quad	96.55
2020-08-17			Fall Kite Event	In Store Sales	Quad	32.13
2020-08-30			None	In Store Sales	Bellen	46.88
2020-08-06			Fall Kite Event	Web Site Sales	Majectic Beaut	90.03
2020-05-11			None	Web Site Sales	Sunbell	46.21
2020-06-26			Festival of Flight	Web Site Sales	Carlota	22.27
2020-08-14			Fall Kite Event	In Store Sales	V-Rang	57.56
2020-06-02			Festival of Flight	In Store Sales	Bellen	46.08
2020-07-02			None	Web Site Sales	Crested Beaut	50.71
2020-08-12			Fall Kite Event	Web Site Sales	Sunshine	40.45
2020-08-28			Fall Kite Event	In Store Sales	Majectic Beaut	90.57
2020-06-07			Festival of Flight	In Store Sales	V-Rang	57.35
2020-09-21			None	Web Site Sales	Aspen	63.82
2020-06-15			Festival of Flight	In Store Sales	Carlota	46.08
2020-08-17			Fall Kite Event	In Store Sales	Bellen	69.13
2020-05-18			None	Web Site Sales	Sunbell	547.46
2020-06-12			Festival of Flight	Web Site Sales	Sunset	45.16
2020-06-24			Festival of Flight	Web Site Sales	Sunshine	19.62
2020-08-26			Fall Kite Event	In Store Sales	Quad	64.91
2020-08-29			Fall Kite Event	Web Site Sales	Aspen	63.3
2020-07-15			None	In Store Sales	Quad	99.77
2020-08-01			None	Web Site Sales	Bellen	92.23
2020-08-14			Fall Kite Event	In Store Sales	Sunset	23.41
2020-09-25			None	In Store Sales	Aspen	40.07
2020-06-03			Festival of Flight	Web Site Sales	FlatTop	554.95
2020-08-06			Fall Kite Event	In Store Sales	Sunshine	60.7
2020-08-11			Fall Kite Event	In Store Sales	Bellen	23.65
2020-08-23			Fall Kite Event	Web Site Sales	Quad	34.78
2020-06-18			Festival of Flight	Web Site Sales	Doublers	156.2
2020-08-27			Fall Kite Event	Web Site Sales	Sunbell	50.2
2020-05-13			None	Web Site Sales	Bellen	46.71
2020-08-06			Fall Kite Event	Web Site Sales	Crested Beaut	48.69
2020-08-11			Fall Kite Event	E-mail Coupon	Aspen	20.83
2020-08-16			Fall Kite Event	In Store Sales	Aspen	57.28
2020-08-02			Fall Kite Event	In Store Sales	Quad	64.44
2020-06-05			Festival of Flight	Web Site Sales	Sunbell	72.9
2020-06-19			Festival of Flight	Web Site Sales	Majectic Beaut	29.45
2020-06-10			Festival of Flight	In Store Sales	Bellen	23.82
2020-08-02			Fall Kite Event	E-mail Coupon	V-Rang	76
2020-07-21			None	Web Site Sales	Bellen	69.72
2020-06-18			Festival of Flight	In Store Sales	Carlota	66.48
2020-09-12			None	In Store Sales	Sunbell	75.49
2020-08-01			None	In Store Sales	Carlota	46.56
2020-06-14			Festival of Flight	In Store Sales	Sunshine	20.87
2020-06-21			Festival of Flight	In Store Sales	FlatTop	55.48
2020-06-26			Festival of Flight	Web Site Sales	Sunbell	50.71
2020-07-15			None	In Store Sales	Quad	66.1
2020-05-13			None	In Store Sales	Bellen	46.73
2020-06-27			Festival of Flight	E-mail Coupon	Sunshine	100.66
2020-06-09			Festival of Flight	Web Site Sales	Majectic Beaut	60.89
2020-08-29			Fall Kite Event	In Store Sales	Bellen	69.16
2020-08-25			Fall Kite Event	Web Site Sales	Quad	64.55
2020-06-15			Festival of Flight	E-mail Coupon	Majectic Beaut	84.47
2020-06-04			Festival of Flight	Web Site Sales	Bellen	23.48
2020-06-04			Festival of Flight	E-mail Coupon	Majectic Beaut	60.73
2020-06-15			Festival of Flight	In Store Sales	Carlota	23.28
2020-06-02			Festival of Flight	Web Site Sales	Sunbell	50.41
2020-07-23			None	Web Site Sales	Sunbell	75.61
2020-07-29			None	In Store Sales	Crested Beaut	296.78
2020-08-16			Fall Kite Event	In Store Sales	Aspen	38.83
2020-08-21			Fall Kite Event	In Store Sales	Bellen	46.42
2020-08-25			Fall Kite Event	Web Site Sales	Sunshine	38.39
2020-05-23			None	Web Site Sales	Carlota	22.38
2020-07-14			None	E-mail Coupon	V-Rang	38.24
2020-08-07			Fall Kite Event	In Store Sales	Sunbell	48.37
2020-08-01			None	E-mail Coupon	Bellen	23.02
2020-06-10			Festival of Flight	In Store Sales	Sunset	45.6
2020-08-29			Fall Kite Event	In Store Sales	Aspen	19.42
2020-08-24			Fall Kite Event	In Store Sales	Doublers	76.98
2020-06-07			Festival of Flight	Web Site Sales	Sunshine	20.87
2020-07-28			None	In Store Sales	V-Rang	57.85
2020-08-19			Fall Kite Event	Web Site Sales	Aspen	19.46
2020-08-19			Fall Kite Event	In Store Sales	Quad	64.65
2020-06-23			Festival of Flight	Web Site Sales	Aspen	38.6
2020-06-16			Festival of Flight	Web Site Sales	V-Rang	18.66
2020-08-10			Fall Kite Event	Web Site Sales	Majectic Beaut	29.45
2020-06-15			Festival of Flight	Web Site Sales	Sunshine	432.85
2020-08-27			Fall Kite Event	Web Site Sales	Majectic Beaut	58.93
2020-08-04			Fall Kite Event	In Store Sales	Sunshine	60.07
2020-05-18			None	Web Site Sales	Sunbell	50.23
2020-08-14			Fall Kite Event	In Store Sales	Bellen	46.11
2020-08-27			Fall Kite Event	In Store Sales	Bellen	44.16
2020-06-28			None	Web Site Sales	Majectic Beaut	87.83
2020-06-19			Festival of Flight	In Store Sales	Carlota	23.57
2020-05-10			None	E-mail Coupon	Aspen	60.88
2020-06-05			Festival of Flight	Web Site Sales	Doublers	80.74
2020-09-05			None	Web Site Sales	Quad	99.44
2020-06-08			Festival of Flight	In Store Sales	V-Rang	308.87
2020-08-16			Fall Kite Event	In Store Sales	Sunshine	38.86
2020-06-14			Festival of Flight	E-mail Coupon	Aspen	38.48
2020-09-11			None	Web Site Sales	V-Rang	36.89
2020-06-22			Festival of Flight	Web Site Sales	Bellen	46.16
2020-08-16			Fall Kite Event	In Store Sales	Aspen	40.26
2020-06-27			Festival of Flight	Web Site Sales	Carlota	46.88
2020-06-18			Festival of Flight	Web Site Sales	Quad	66.07
2020-08-17			Fall Kite Event	In Store Sales	Majectic Beaut	90.57
2020-09-11			None	Web Site Sales	Sunshine	40.54
2020-08-09			Fall Kite Event	In Store Sales	Sunbell	50.42
2020-08-21			Fall Kite Event	E-mail Coupon	Sunset	47.13
2020-06-03			Festival of Flight	In Store Sales	Sunshine	60.84
2020-08-17			Fall Kite Event	In Store Sales	Carlota	46.98
2020-07-25			None	Web Site Sales	V-Rang	36.95
2020-09-16			None	In Store Sales	Sunset	90.97
2020-06-12			Festival of Flight	Web Site Sales	Majectic Beaut	30.27
2020-06-01			Festival of Flight	In Store Sales	Carlota	46.27
2020-06-30			None	Web Site Sales	Sunset	68.64
2020-06-16			Festival of Flight	Web Site Sales	Sunbell	48.22
2020-08-18			Fall Kite Event	In Store Sales	Sunset	165.2
2020-08-25			Fall Kite Event	In Store Sales	Carlota	46.94
2020-08-14			Fall Kite Event	Web Site Sales	Quad	68.54
2020-08-11			Fall Kite Event	In Store Sales	Bellen	69.54
2020-06-22			Festival of Flight	Web Site Sales	Carlota	69.92
2020-08-10			Fall Kite Event	In Store Sales	Quad	33.42
2020-05-22			None	E-mail Coupon	Carlota	46.14
2020-08-04			Fall Kite Event	In Store Sales	Sunbell	96.73
2020-08-31			None	In Store Sales	Bellen	46.17
2020-08-01			None	In Store Sales	Sunbell	75.77
2020-07-22			None	In Store Sales	Bellen	92.92
2020-06-24			Festival of Flight	Web Site Sales	Quad	68.72
2020-06-11			Festival of Flight	Web Site Sales	Quad	64.29
2020-06-10			Festival of Flight	Web Site Sales	Quad	99.52
2020-06-08			Festival of Flight	Web Site Sales	Aspen	20.12
2020-08-29			Fall Kite Event	In Store Sales	Majectic Beaut	58.7
2020-05-06			None	E-mail Coupon	Sunshine	20.52
2020-07-06			None	In Store Sales	Carlota	23.28
2020-09-15			None	Web Site Sales	Sunset	514.06
2020-06-12			Festival of Flight	In Store Sales	Carlota	46.94
2020-05-17			None	Web Site Sales	Sunbell	46.85
2020-08-11			Fall Kite Event	In Store Sales	Sunshine	60.62
2020-06-19			Festival of Flight	Web Site Sales	Bellen	46.1
2020-06-10			Festival of Flight	Web Site Sales	Majectic Beaut	570.93
2020-05-08			None	Web Site Sales	Aspen	42.72
2020-06-21			Festival of Flight	Web Site Sales	Sunset	71.13
2020-08-19			Fall Kite Event	Web Site Sales	Sunshine	40.65
2020-06-27			Festival of Flight	Web Site Sales	Sunshine	40.8
2020-05-11			None	E-mail Coupon	Quad	68.13
2020-06-03			Festival of Flight	Web Site Sales	Carlota	23.26
2020-09-10			None	Web Site Sales	Aspen	38.98
2020-07-26			None	Web Site Sales	Sunbell	48.75
2020-09-25			None	In Store Sales	Crested Beaut	72.06
2020-08-16			Fall Kite Event	In Store Sales	Quad	132.27
2020-06-26			Festival of Flight	In Store Sales	Doublers	240.39
2020-06-07			Festival of Flight	Web Site Sales	Crested Beaut	25.49
2020-09-14			None	In Store Sales	Carlota	23.91
2020-08-04			Fall Kite Event	E-mail Coupon	Crested Beaut	48.98
2020-09-03			None	Web Site Sales	Doublers	240.17
2020-06-23			Festival of Flight	Web Site Sales	Bellen	414.74
2020-08-14			Fall Kite Event	Web Site Sales	Sunbell	23.45
2020-08-27			Fall Kite Event	E-mail Coupon	Carlota	305.39
2020-06-15			Festival of Flight	Web Site Sales	Sunshine	455.46
2020-09-19			None	Web Site Sales	Carlota	23.64
2020-06-21			Festival of Flight	In Store Sales	Quad	99.08
2020-05-13			None	In Store Sales	FlatTop	28.35
2020-08-30			None	In Store Sales	Doublers	835.55
2020-06-07			Festival of Flight	Web Site Sales	Sunshine	40.84
2020-08-27			Fall Kite Event	Web Site Sales	Carlota	23.67
2020-07-12			None	In Store Sales	Quad	64.73
2020-09-25			None	Web Site Sales	Carlota	23.51
2020-08-22			Fall Kite Event	In Store Sales	Quad	272.22
2020-06-30			None	In Store Sales	Sunbell	24.18
2020-08-13			Fall Kite Event	In Store Sales	Doublers	240.19
2020-06-16			Festival of Flight	In Store Sales	FlatTop	470.98
2020-08-02			Fall Kite Event	In Store Sales	Sunshine	20.78
2020-06-19			Festival of Flight	In Store Sales	Aspen	259.74
2020-08-11			Fall Kite Event	In Store Sales	Sunset	71.05
2020-08-07			Fall Kite Event	Web Site Sales	Carlota	46.3
2020-08-31			None	In Store Sales	Aspen	42.04
2020-05-20			None	Web Site Sales	Sunbell	50.98
2020-09-18			None	Web Site Sales	Quad	96.43
2020-06-24			Festival of Flight	E-mail Coupon	Sunshine	20.38
2020-06-12			Festival of Flight	In Store Sales	Bellen	46.69
2020-08-11			Fall Kite Event	Web Site Sales	Quad	486.68
2020-09-29			None	Web Site Sales	Carlota	69.25
2020-07-21			None	Web Site Sales	Quad	99.01
2020-08-27			Fall Kite Event	In Store Sales	Carlota	23.16
2020-06-17			Festival of Flight	E-mail Coupon	Majectic Beaut	58.53
2020-06-13			Festival of Flight	Web Site Sales	Sunshine	20.12
2020-06-18			Festival of Flight	In Store Sales	Bellen	161.48
2020-08-28			Fall Kite Event	In Store Sales	V-Rang	36.75
2020-06-12			Festival of Flight	E-mail Coupon	Carlota	46.04
2020-09-26			None	Web Site Sales	Carlota	23.47
2020-06-08			Festival of Flight	Web Site Sales	Sunshine	436.31
2020-06-06			Festival of Flight	Web Site Sales	Doublers	152.8
2020-08-23			Fall Kite Event	Web Site Sales	Crested Beaut	46.13
2020-08-06			Fall Kite Event	E-mail Coupon	Sunset	45.07
2020-09-29			None	Web Site Sales	V-Rang	19.73
2020-08-21			Fall Kite Event	In Store Sales	Carlota	240.64
2020-06-06			Festival of Flight	Web Site Sales	Majectic Beaut	441.09
2020-06-27			Festival of Flight	Web Site Sales	Quad	99.37
2020-08-04			Fall Kite Event	E-mail Coupon	Bellen	69.28
2020-06-28			None	Web Site Sales	Bellen	46.88
2020-06-20			Festival of Flight	Web Site Sales	Quad	99.28
2020-06-18			Festival of Flight	Web Site Sales	Sunset	23.9
2020-08-26			Fall Kite Event	Web Site Sales	Sunbell	92.43
2020-09-11			None	Web Site Sales	Sunshine	40.94
2020-06-12			Festival of Flight	Web Site Sales	Quad	96.81
2020-06-06			Festival of Flight	In Store Sales	Bellen	69.36
2020-08-29			Fall Kite Event	Web Site Sales	Sunshine	40.51
2020-05-23			None	In Store Sales	Quad	160.6
2020-08-03			Fall Kite Event	Web Site Sales	FlatTop	55.36
2020-08-09			Fall Kite Event	In Store Sales	Majectic Beaut	87.79
2020-06-12			Festival of Flight	Web Site Sales	Sunshine	38.77
2020-08-12			Fall Kite Event	In Store Sales	Sunset	45.98
2020-08-23			Fall Kite Event	In Store Sales	Sunbell	48.35
2020-09-01			None	In Store Sales	FlatTop	110.05
2020-06-26			Festival of Flight	Web Site Sales	Carlota	371.34
2020-06-16			Festival of Flight	Web Site Sales	Bellen	46.18
2020-09-20			None	Web Site Sales	Carlota	23.36
2020-05-10			None	Web Site Sales	Sunbell	25.16
2020-06-19			Festival of Flight	Web Site Sales	Bellen	69.37
2020-06-10			Festival of Flight	Web Site Sales	Carlota	523.21
2020-08-23			Fall Kite Event	Web Site Sales	Carlota	46.6
2020-08-26			Fall Kite Event	In Store Sales	Sunshine	38.11
2020-06-11			Festival of Flight	In Store Sales	Carlota	23.76
2020-09-26			None	Web Site Sales	Quad	198.15
2020-07-17			None	E-mail Coupon	Carlota	46.48
2020-07-13			None	Web Site Sales	Sunbell	388.15
2020-06-29			None	In Store Sales	Quad	549.99
2020-08-08			Fall Kite Event	In Store Sales	Sunset	24.19
2020-08-07			Fall Kite Event	In Store Sales	Bellen	23.37
2020-08-26			Fall Kite Event	In Store Sales	Carlota	46.13
2020-08-03			Fall Kite Event	E-mail Coupon	Sunshine	40.33
2020-08-03			Fall Kite Event	In Store Sales	Sunbell	72.47
2020-06-23			Festival of Flight	In Store Sales	Sunshine	40.3
2020-08-03			Fall Kite Event	In Store Sales	Quad	99.78
2020-08-03			Fall Kite Event	Web Site Sales	Sunset	24.62
2020-08-07			Fall Kite Event	In Store Sales	Quad	96.01
2020-05-31			Festival of Flight	Web Site Sales	Sunbell	48.77
2020-06-01			Festival of Flight	Web Site Sales	Majectic Beaut	90.47
2020-06-13			Festival of Flight	In Store Sales	Quad	165.62
2020-08-14			Fall Kite Event	In Store Sales	Sunshine	38.37
2020-06-24			Festival of Flight	In Store Sales	Sunshine	20.84
2020-06-02			Festival of Flight	Web Site Sales	Carlota	110.85
2020-09-17			None	Web Site Sales	Carlota	69.32
2020-06-24			Festival of Flight	E-mail Coupon	Sunset	71.7
2020-08-22			Fall Kite Event	E-mail Coupon	Quad	68.46
2020-06-20			Festival of Flight	Web Site Sales	Carlota	23.11
2020-06-12			Festival of Flight	Web Site Sales	Sunshine	417.42
2020-08-15			Fall Kite Event	In Store Sales	Sunshine	20.8
2020-06-14			Festival of Flight	Web Site Sales	Quad	297.15
2020-06-09			Festival of Flight	E-mail Coupon	Aspen	42.23
2020-08-21			Fall Kite Event	Web Site Sales	Sunbell	50.1
2020-06-18			Festival of Flight	In Store Sales	Quad	34.63
2020-08-15			Fall Kite Event	Web Site Sales	Quad	66.89
2020-06-02			Festival of Flight	E-mail Coupon	FlatTop	55.49
2020-08-22			Fall Kite Event	Web Site Sales	Bellen	69.77
2020-06-26			Festival of Flight	In Store Sales	Quad	34.45
2020-07-01			None	Web Site Sales	Sunset	24.59
2020-09-02			None	In Store Sales	Doublers	160.03
2020-05-22			None	Web Site Sales	V-Rang	54.49
2020-06-18			Festival of Flight	Web Site Sales	Quad	66.36
2020-08-28			Fall Kite Event	Web Site Sales	Crested Beaut	75.16
2020-08-29			Fall Kite Event	In Store Sales	Sunshine	38.64
2020-08-29			Fall Kite Event	In Store Sales	Quad	64.87
2020-06-07			Festival of Flight	Web Site Sales	Bellen	46.19
2020-05-30			None	E-mail Coupon	Bellen	23.77
2020-06-04			Festival of Flight	In Store Sales	Sunset	47.59
2020-06-12			Festival of Flight	Web Site Sales	Sunshine	20.73
2020-08-15			Fall Kite Event	In Store Sales	Bellen	46.73
2020-08-03			Fall Kite Event	Web Site Sales	Aspen	76.31
2020-06-10			Festival of Flight	Web Site Sales	Bellen	69.46
2020-07-23			None	In Store Sales	Sunbell	75.3
2020-08-02			Fall Kite Event	In Store Sales	Aspen	80.41
2020-08-31			None	Web Site Sales	FlatTop	55.04
2020-08-10			Fall Kite Event	In Store Sales	Sunshine	20.34
2020-09-30			None	Web Site Sales	Sunbell	23.73
2020-08-17			Fall Kite Event	In Store Sales	Quad	596.19
2020-06-07			Festival of Flight	E-mail Coupon	Sunset	94.91
2020-08-17			Fall Kite Event	In Store Sales	Bellen	23.64
2020-06-01			Festival of Flight	Web Site Sales	Sunbell	69.81
2020-05-31			Festival of Flight	Web Site Sales	Quad	34.78
2020-08-21			Fall Kite Event	E-mail Coupon	Quad	66.09
2020-08-24			Fall Kite Event	E-mail Coupon	Bellen	414.52
2020-06-18			Festival of Flight	In Store Sales	Quad	34.2
2020-08-15			Fall Kite Event	In Store Sales	Quad	68.84
2020-05-09			None	E-mail Coupon	Crested Beaut	25.81
2020-06-30			None	In Store Sales	Sunbell	48.34
2020-08-15			Fall Kite Event	Web Site Sales	Bellen	46.23
2020-08-29			Fall Kite Event	E-mail Coupon	Bellen	69.28
2020-08-02			Fall Kite Event	In Store Sales	Crested Beaut	50.36
2020-08-06			Fall Kite Event	In Store Sales	Quad	33.58
2020-08-25			Fall Kite Event	In Store Sales	Bellen	230.45
2020-08-14			Fall Kite Event	E-mail Coupon	Carlota	23.5
2020-06-24			Festival of Flight	Web Site Sales	Crested Beaut	50.77
2020-06-27			Festival of Flight	Web Site Sales	Doublers	240.11
2020-06-02			Festival of Flight	Web Site Sales	Quad	99.47
2020-06-18			Festival of Flight	Web Site Sales	Sunset	47.94
2020-06-03			Festival of Flight	In Store Sales	Quad	99.69
2020-07-01			None	Web Site Sales	Quad	102.69
2020-08-19			Fall Kite Event	Web Site Sales	Sunset	94.99
2020-06-21			Festival of Flight	Web Site Sales	Sunbell	25.38
2020-06-07			Festival of Flight	Web Site Sales	Sunbell	48.84
2020-08-09			Fall Kite Event	In Store Sales	Crested Beaut	523.94
2020-08-06			Fall Kite Event	In Store Sales	Bellen	69.95
2020-06-11			Festival of Flight	In Store Sales	Aspen	40.26
2020-08-06			Fall Kite Event	Web Site Sales	Sunbell	72.5
2020-08-23			Fall Kite Event	In Store Sales	Aspen	38.69
2020-08-16			Fall Kite Event	Web Site Sales	Sunbell	546.23
2020-06-19			Festival of Flight	Web Site Sales	Crested Beaut	48.23
2020-08-23			Fall Kite Event	In Store Sales	Majectic Beaut	87.14
2020-08-15			Fall Kite Event	In Store Sales	FlatTop	302.06
2020-06-14			Festival of Flight	Web Site Sales	Doublers	160.25
2020-07-02			None	E-mail Coupon	Majectic Beaut	232.87
2020-08-24			Fall Kite Event	In Store Sales	Majectic Beaut	60.94
2020-09-14			None	Web Site Sales	Sunbell	75.8
2020-08-13			Fall Kite Event	Web Site Sales	Sunshine	20.4
2020-09-13			None	Web Site Sales	Sunbell	46.13
2020-09-26			None	Web Site Sales	Sunbell	48.27
2020-05-29			None	In Store Sales	Bellen	23.46
2020-08-05			Fall Kite Event	Web Site Sales	Majectic Beaut	90.55
2020-08-14			Fall Kite Event	In Store Sales	Crested Beaut	48.05
2020-05-17			None	Web Site Sales	FlatTop	55.1
2020-05-14			None	In Store Sales	Sunset	47.12
2020-08-14			Fall Kite Event	E-mail Coupon	Quad	99.9
2020-05-23			None	Web Site Sales	Crested Beaut	75.97
2020-06-02			Festival of Flight	Web Site Sales	Sunshine	40.72
2020-06-28			None	E-mail Coupon	Crested Beaut	75.04
2020-08-01			None	Web Site Sales	Sunshine	60.66
2020-08-29			Fall Kite Event	In Store Sales	Majectic Beaut	29.51
2020-08-11			Fall Kite Event	Web Site Sales	Carlota	46.06
2020-08-22			Fall Kite Event	In Store Sales	Carlota	46.43
2020-08-10			Fall Kite Event	E-mail Coupon	Crested Beaut	72.44
2020-09-27			None	In Store Sales	Sunbell	75.82
2020-09-21			None	Web Site Sales	Bellen	66.27
2020-08-10			Fall Kite Event	In Store Sales	Sunshine	60.15
2020-08-08			Fall Kite Event	Web Site Sales	Majectic Beaut	58.94
2020-08-17			Fall Kite Event	In Store Sales	Sunbell	69.37
2020-06-17			Festival of Flight	Web Site Sales	V-Rang	18.68
2020-06-13			Festival of Flight	E-mail Coupon	Crested Beaut	75.25
2020-08-10			Fall Kite Event	Web Site Sales	Quad	34.36
2020-09-29			None	Web Site Sales	Quad	99.52
2020-09-30			None	Web Site Sales	Sunbell	24.75
2020-05-29			None	Web Site Sales	Sunbell	69.84
2020-08-23			Fall Kite Event	Web Site Sales	Majectic Beaut	90.94
2020-06-02			Festival of Flight	E-mail Coupon	Sunshine	20.95
2020-05-22			None	Web Site Sales	Sunshine	20.68
2020-06-14			Festival of Flight	In Store Sales	Sunset	68.73
2020-08-31			None	Web Site Sales	Sunbell	456.63
2020-08-21			Fall Kite Event	In Store Sales	Quad	102.35
2020-08-08			Fall Kite Event	In Store Sales	Sunbell	23.82
2020-06-05			Festival of Flight	Web Site Sales	Quad	66.35
2020-09-22			None	Web Site Sales	Quad	68.31
2020-08-09			Fall Kite Event	In Store Sales	Sunbell	75.11
2020-08-04			Fall Kite Event	Web Site Sales	Quad	68.13
2020-08-03			Fall Kite Event	In Store Sales	Quad	33.06
2020-08-07			Fall Kite Event	Web Site Sales	Sunbell	24.11
2020-08-03			Fall Kite Event	In Store Sales	Sunset	47.02
2020-08-29			Fall Kite Event	Web Site Sales	Aspen	38.88
2020-08-17			Fall Kite Event	E-mail Coupon	Sunset	424.33
2020-05-11			None	Web Site Sales	Sunshine	40.93
2020-08-28			Fall Kite Event	In Store Sales	Crested Beaut	48.24
2020-06-26			Festival of Flight	Web Site Sales	Quad	102.29
2020-09-26			None	Web Site Sales	Carlota	92.2
2020-06-23			Festival of Flight	Web Site Sales	Carlota	46.33
2020-08-20			Fall Kite Event	In Store Sales	Sunshine	40.55
2020-08-19			Fall Kite Event	Web Site Sales	Quad	66.57
2020-05-23			None	In Store Sales	Crested Beaut	72.52
2020-08-26			Fall Kite Event	Web Site Sales	Quad	66.85
2020-06-09			Festival of Flight	In Store Sales	Sunset	47.86
2020-05-24			None	E-mail Coupon	Doublers	160.63
2020-08-21			Fall Kite Event	E-mail Coupon	Sunbell	75.06
2020-08-13			Fall Kite Event	Web Site Sales	Quad	66.45
2020-06-21			Festival of Flight	Web Site Sales	Carlota	23.85
2020-08-12			Fall Kite Event	Web Site Sales	Carlota	23.49
2020-08-18			Fall Kite Event	In Store Sales	Sunbell	72.64
2020-08-04			Fall Kite Event	In Store Sales	Doublers	320.73
2020-05-13			None	E-mail Coupon	Sunbell	48.58
2020-08-26			Fall Kite Event	In Store Sales	Bellen	23.35
2020-08-21			Fall Kite Event	E-mail Coupon	Quad	99.1
2020-08-29			Fall Kite Event	In Store Sales	Bellen	46.34
2020-06-27			Festival of Flight	In Store Sales	Quad	68.2
2020-07-04			None	Web Site Sales	Doublers	160.19
2020-08-27			Fall Kite Event	E-mail Coupon	Quad	34.95
2020-08-31			None	In Store Sales	Sunshine	20.39
2020-06-14			Festival of Flight	Web Site Sales	Quad	549.31
2020-07-25			None	Web Site Sales	Doublers	240.27
2020-06-20			Festival of Flight	Web Site Sales	Carlota	69.11
2020-07-26			None	In Store Sales	Carlota	44.59
2020-08-24			Fall Kite Event	In Store Sales	Quad	68.65
2020-06-02			Festival of Flight	Web Site Sales	Sunbell	24.83
2020-06-07			Festival of Flight	Web Site Sales	Majectic Beaut	28.88
2020-08-03			Fall Kite Event	Web Site Sales	Majectic Beaut	87.73
2020-08-28			Fall Kite Event	In Store Sales	Aspen	42.53
2020-05-28			None	Web Site Sales	Doublers	240.01
2020-08-11			Fall Kite Event	In Store Sales	Sunshine	40.41
2020-08-21			Fall Kite Event	Web Site Sales	Aspen	38.68
2020-08-11			Fall Kite Event	In Store Sales	Sunbell	46.17
2020-08-24			Fall Kite Event	Web Site Sales	Bellen	22.7
2020-08-12			Fall Kite Event	In Store Sales	Aspen	60.17
2020-09-16			None	In Store Sales	Quad	99.79
2020-06-03			Festival of Flight	Web Site Sales	Sunbell	24.1
2020-08-24			Fall Kite Event	In Store Sales	Carlota	46.93
2020-08-07			Fall Kite Event	In Store Sales	Sunshine	100.09
2020-05-19			None	In Store Sales	Bellen	66.88
2020-05-12			None	Web Site Sales	Quad	34.71
2020-08-05			Fall Kite Event	In Store Sales	Sunset	71.4
2020-06-29			None	Web Site Sales	V-Rang	36.27
2020-07-16			None	In Store Sales	Sunbell	75.9
2020-06-20			Festival of Flight	Web Site Sales	Sunshine	40.99
2020-05-25			None	Web Site Sales	Carlota	46.06
2020-06-09			Festival of Flight	Web Site Sales	Quad	66.27
2020-07-24			None	Web Site Sales	Crested Beaut	72.66
2020-06-11			Festival of Flight	E-mail Coupon	Quad	170.23
2020-08-02			Fall Kite Event	Web Site Sales	Doublers	160.79
2020-08-15			Fall Kite Event	In Store Sales	Sunbell	69.88
2020-08-10			Fall Kite Event	Web Site Sales	Majectic Beaut	29.03
2020-08-18			Fall Kite Event	In Store Sales	Sunbell	48.12
2020-06-28			None	Web Site Sales	Majectic Beaut	60.99
2020-08-22			Fall Kite Event	In Store Sales	Quad	96.19
2020-08-02			Fall Kite Event	Web Site Sales	Quad	99.33
2020-05-12			None	Web Site Sales	Aspen	63.09
2020-08-28			Fall Kite Event	Web Site Sales	Sunshine	60.02
2020-08-06			Fall Kite Event	In Store Sales	V-Rang	19.47
2020-06-03			Festival of Flight	Web Site Sales	Carlota	414.97
2020-06-15			Festival of Flight	Web Site Sales	Bellen	46.07
2020-06-09			Festival of Flight	In Store Sales	Majectic Beaut	399.27
2020-06-14			Festival of Flight	Web Site Sales	Majectic Beaut	120.5
2020-08-04			Fall Kite Event	Web Site Sales	Bellen	46.03
2020-06-19			Festival of Flight	In Store Sales	Sunshine	57.39
2020-05-05			None	E-mail Coupon	Bellen	69.67
2020-06-06			Festival of Flight	In Store Sales	Carlota	46.21
2020-08-08			Fall Kite Event	In Store Sales	Bellen	46.46
2020-08-15			Fall Kite Event	E-mail Coupon	Carlota	23.13
2020-08-20			Fall Kite Event	In Store Sales	Bellen	46.51
2020-06-04			Festival of Flight	E-mail Coupon	Aspen	20.56
2020-07-30			None	Web Site Sales	Sunset	71.09
2020-08-07			Fall Kite Event	In Store Sales	Crested Beaut	72.19
2020-08-04			Fall Kite Event	Web Site Sales	Sunbell	72.67
2020-08-03			Fall Kite Event	In Store Sales	FlatTop	27.27
2020-06-24			Festival of Flight	Web Site Sales	Sunshine	60.59
2020-06-10			Festival of Flight	Web Site Sales	Bellen	23.48
2020-08-26			Fall Kite Event	Web Site Sales	Majectic Beaut	579.64
2020-08-09			Fall Kite Event	In Store Sales	Carlota	23.77
2020-09-19			None	Web Site Sales	Carlota	66.06
2020-08-05			Fall Kite Event	In Store Sales	Carlota	334.32
2020-06-26			Festival of Flight	Web Site Sales	Doublers	152.08
2020-06-15			Festival of Flight	In Store Sales	Quad	66.45
2020-08-16			Fall Kite Event	Web Site Sales	Bellen	23.97
2020-08-07			Fall Kite Event	In Store Sales	Carlota	66.71
2020-09-24			None	In Store Sales	Quad	711.07
2020-05-10			None	Web Site Sales	Quad	68.1
2020-06-28			None	Web Site Sales	Majectic Beaut	90.4
2020-07-10			None	In Store Sales	Quad	68.43
2020-07-22			None	Web Site Sales	Sunbell	75.88
2020-08-07			Fall Kite Event	In Store Sales	Sunbell	100.81
2020-08-06			Fall Kite Event	Web Site Sales	Majectic Beaut	58.45
2020-06-07			Festival of Flight	Web Site Sales	Sunshine	20.72
2020-08-07			Fall Kite Event	Web Site Sales	Aspen	40.53
2020-05-19			None	In Store Sales	Majectic Beaut	87.67
2020-06-08			Festival of Flight	Web Site Sales	Quad	102.13
2020-06-28			None	In Store Sales	Sunset	513.49
2020-06-21			Festival of Flight	Web Site Sales	Majectic Beaut	28.03
2020-08-25			Fall Kite Event	In Store Sales	Bellen	69
2020-08-01			None	Web Site Sales	Majectic Beaut	661.04
2020-08-30			None	In Store Sales	Bellen	23.67
2020-06-16			Festival of Flight	Web Site Sales	Bellen	46.56
2020-06-08			Festival of Flight	In Store Sales	Bellen	23.9
2020-08-09			Fall Kite Event	In Store Sales	Doublers	160.35
2020-06-25			Festival of Flight	Web Site Sales	Doublers	240.49
2020-06-19			Festival of Flight	E-mail Coupon	Carlota	46.12
2020-08-18			Fall Kite Event	In Store Sales	Majectic Beaut	29.79
2020-08-25			Fall Kite Event	Web Site Sales	Doublers	240.57
2020-06-07			Festival of Flight	In Store Sales	Sunshine	40.66
2020-06-06			Festival of Flight	In Store Sales	Sunshine	60.15
2020-08-14			Fall Kite Event	In Store Sales	Doublers	240.69
2020-06-16			Festival of Flight	In Store Sales	Carlota	46.89
2020-08-24			Fall Kite Event	In Store Sales	Sunshine	20.39
2020-08-03			Fall Kite Event	In Store Sales	Quad	66.39
2020-08-17			Fall Kite Event	In Store Sales	Quad	96.01
2020-08-21			Fall Kite Event	Web Site Sales	Carlota	46.03
2020-06-04			Festival of Flight	Web Site Sales	Crested Beaut	25.91
2020-06-06			Festival of Flight	E-mail Coupon	Carlota	305.52
2020-06-23			Festival of Flight	Web Site Sales	Quad	198.99
2020-08-08			Fall Kite Event	Web Site Sales	Bellen	523.39
2020-06-08			Festival of Flight	In Store Sales	Crested Beaut	50.31
2020-05-05			None	Web Site Sales	Sunset	514.02
2020-08-12			Fall Kite Event	In Store Sales	Majectic Beaut	58.12
2020-09-22			None	E-mail Coupon	Sunset	23.24
2020-06-09			Festival of Flight	Web Site Sales	Bellen	46.76
2020-06-27			Festival of Flight	In Store Sales	Bellen	69.53
2020-08-22			Fall Kite Event	In Store Sales	Sunshine	60.42
2020-06-19			Festival of Flight	Web Site Sales	Crested Beaut	48.29
2020-08-19			Fall Kite Event	In Store Sales	V-Rang	38.15
2020-08-24			Fall Kite Event	Web Site Sales	Quad	608.86
2020-06-16			Festival of Flight	Web Site Sales	Bellen	23.21
2020-06-18			Festival of Flight	Web Site Sales	Sunshine	40.42
2020-08-24			Fall Kite Event	E-mail Coupon	Carlota	46.45
2020-05-23			None	Web Site Sales	Quad	34.47
2020-06-25			Festival of Flight	Web Site Sales	Majectic Beaut	58.2
2020-07-14			None	In Store Sales	Sunset	363.9
2020-06-20			Festival of Flight	Web Site Sales	Quad	66.46
2020-06-17			Festival of Flight	In Store Sales	Carlota	46.2
2020-08-11			Fall Kite Event	In Store Sales	Sunshine	20.7
2020-09-20			None	Web Site Sales	Sunbell	48.29
2020-08-28			Fall Kite Event	In Store Sales	Sunshine	379.58
2020-08-19			Fall Kite Event	Web Site Sales	Bellen	23.84
2020-08-07			Fall Kite Event	In Store Sales	Sunshine	38.62
2020-08-19			Fall Kite Event	In Store Sales	Sunset	24.68
2020-06-23			Festival of Flight	In Store Sales	Quad	66.98
2020-06-30			None	Web Site Sales	Sunbell	50.45
2020-05-17			None	Web Site Sales	Aspen	60.4
2020-06-18			Festival of Flight	Web Site Sales	Carlota	46.65
2020-08-10			Fall Kite Event	In Store Sales	Sunbell	184.91
2020-06-12			Festival of Flight	In Store Sales	Carlota	69.7
2020-06-02			Festival of Flight	Web Site Sales	Bellen	46.06
2020-07-13			None	Web Site Sales	Carlota	22.79
2020-08-12			Fall Kite Event	In Store Sales	Quad	99.38
2020-06-15			Festival of Flight	In Store Sales	Carlota	23.61
2020-06-15			Festival of Flight	In Store Sales	Quad	102.39
2020-06-08			Festival of Flight	E-mail Coupon	Aspen	80.18
2020-06-10			Festival of Flight	Web Site Sales	Sunshine	40.35
2020-06-27			Festival of Flight	Web Site Sales	Carlota	436
2020-07-16			None	Web Site Sales	Aspen	60.23
2020-08-26			Fall Kite Event	Web Site Sales	Doublers	228.56
2020-08-27			Fall Kite Event	In Store Sales	Sunbell	48.14
2020-08-28			Fall Kite Event	Web Site Sales	Sunshine	40.35
2020-06-17			Festival of Flight	In Store Sales	Carlota	69.96
2020-08-07			Fall Kite Event	Web Site Sales	Majectic Beaut	58.3
2020-08-09			Fall Kite Event	In Store Sales	Quad	132.06
2020-06-25			Festival of Flight	In Store Sales	Bellen	92.87
2020-05-04			None	In Store Sales	Sunshine	60.03
2020-05-29			None	In Store Sales	Sunset	71.84
2020-06-01			Festival of Flight	Web Site Sales	Crested Beaut	24.49
2020-08-15			Fall Kite Event	Web Site Sales	Sunbell	125.78
2020-08-12			Fall Kite Event	In Store Sales	Sunbell	23.92
2020-06-09			Festival of Flight	Web Site Sales	Carlota	46.42
2020-06-30			None	Web Site Sales	Quad	32.96
2020-07-14			None	Web Site Sales	Aspen	60.85
2020-08-09			Fall Kite Event	In Store Sales	Sunbell	23.13
2020-06-29			None	In Store Sales	Crested Beaut	48.51
2020-08-20			Fall Kite Event	In Store Sales	Sunbell	75.92
2020-09-04			None	Web Site Sales	Sunshine	38.51
2020-06-02			Festival of Flight	In Store Sales	Carlota	46.77
2020-08-10			Fall Kite Event	In Store Sales	Bellen	92.26
2020-08-30			None	In Store Sales	Sunshine	20.78
2020-06-13			Festival of Flight	E-mail Coupon	Sunset	71.64
2020-06-09			Festival of Flight	Web Site Sales	Bellen	66.82
2020-08-02			Fall Kite Event	In Store Sales	Sunshine	60.24
2020-06-26			Festival of Flight	Web Site Sales	Majectic Beaut	116.11
2020-08-30			None	E-mail Coupon	FlatTop	28.5
2020-08-29			Fall Kite Event	In Store Sales	Carlota	69.54
2020-05-11			None	In Store Sales	Bellen	44.77
2020-06-10			Festival of Flight	Web Site Sales	Bellen	46.79
2020-06-26			Festival of Flight	Web Site Sales	Sunshine	19.5
2020-08-23			Fall Kite Event	In Store Sales	Bellen	46.42
2020-06-10			Festival of Flight	In Store Sales	Aspen	60.36
2020-07-23			None	Web Site Sales	Majectic Beaut	87.89
2020-08-17			Fall Kite Event	Web Site Sales	Sunshine	60.19
2020-08-29			Fall Kite Event	In Store Sales	Quad	66.76
2020-08-10			Fall Kite Event	Web Site Sales	Sunbell	75.96
2020-08-15			Fall Kite Event	In Store Sales	Sunshine	38.38
2020-08-08			Fall Kite Event	In Store Sales	Sunbell	50.56
2020-05-25			None	Web Site Sales	Carlota	46.8
2020-06-17			Festival of Flight	Web Site Sales	Carlota	46.74
2020-06-05			Festival of Flight	Web Site Sales	V-Rang	38.09
2020-05-19			None	Web Site Sales	Carlota	23.7
2020-08-16			Fall Kite Event	In Store Sales	Carlota	69.17
2020-07-01			None	In Store Sales	Sunshine	20.07
2020-07-02			None	E-mail Coupon	Sunshine	20.4
2020-06-11			Festival of Flight	Web Site Sales	Majectic Beaut	30.14
2020-06-27			Festival of Flight	Web Site Sales	Sunshine	60.85
2020-09-18			None	Web Site Sales	Carlota	23
2020-08-06			Fall Kite Event	E-mail Coupon	Sunshine	20.13
2020-08-30			None	Web Site Sales	Crested Beaut	50.15
2020-06-20			Festival of Flight	Web Site Sales	Majectic Beaut	58.02
2020-09-11			None	Web Site Sales	Sunbell	50.49
2020-08-07			Fall Kite Event	In Store Sales	Doublers	240.64
2020-06-16			Festival of Flight	Web Site Sales	Sunbell	48.52
2020-08-10			Fall Kite Event	In Store Sales	Carlota	46.42
2020-09-11			None	In Store Sales	Bellen	46.91
2020-08-16			Fall Kite Event	In Store Sales	Quad	33.12
2020-06-21			Festival of Flight	Web Site Sales	FlatTop	55.38
2020-08-07			Fall Kite Event	E-mail Coupon	Quad	33.01
2020-05-21			None	E-mail Coupon	Sunshine	40.51
2020-07-18			None	Web Site Sales	Bellen	46.83
2020-06-05			Festival of Flight	Web Site Sales	Quad	64.58
2020-06-28			None	In Store Sales	Sunset	23.73
2020-07-19			None	Web Site Sales	Quad	533.77
2020-08-12			Fall Kite Event	In Store Sales	Quad	66.47
2020-08-19			Fall Kite Event	Web Site Sales	Carlota	69.93
2020-08-31			None	E-mail Coupon	Sunset	24.29
2020-08-16			Fall Kite Event	Web Site Sales	Quad	33.9
2020-08-01			None	In Store Sales	Sunset	23.04
2020-06-18			Festival of Flight	Web Site Sales	Quad	68.12
2020-08-26			Fall Kite Event	In Store Sales	FlatTop	55.47
2020-09-21			None	In Store Sales	Aspen	21.78
2020-06-06			Festival of Flight	Web Site Sales	Carlota	154.74
2020-06-02			Festival of Flight	Web Site Sales	Quad	64.26
2020-08-30			None	In Store Sales	Sunbell	72.85
2020-08-21			Fall Kite Event	Web Site Sales	Sunshine	20.51
2020-06-29			None	Web Site Sales	Majectic Beaut	56.81
2020-08-18			Fall Kite Event	Web Site Sales	Carlota	69.49
2020-05-04			None	In Store Sales	Aspen	38.38
2020-06-06			Festival of Flight	Web Site Sales	Carlota	46.83
2020-08-16			Fall Kite Event	In Store Sales	Sunshine	80.09
2020-06-09			Festival of Flight	E-mail Coupon	Majectic Beaut	29.98
2020-06-16			Festival of Flight	In Store Sales	Sunshine	40.22
2020-06-30			None	In Store Sales	Carlota	69.61
2020-05-28			None	Web Site Sales	Sunbell	75.72
2020-08-27			Fall Kite Event	E-mail Coupon	Carlota	44.63
2020-06-20			Festival of Flight	Web Site Sales	Quad	66.64
2020-08-03			Fall Kite Event	In Store Sales	Quad	102.7
2020-06-12			Festival of Flight	Web Site Sales	Majectic Beaut	90.32
2020-06-08			Festival of Flight	In Store Sales	Sunshine	20.99
2020-05-03			None	Web Site Sales	Majectic Beaut	523.23
2020-08-25			Fall Kite Event	Web Site Sales	Aspen	38.64
2020-08-11			Fall Kite Event	In Store Sales	Sunshine	76.41
2020-08-21			Fall Kite Event	In Store Sales	Majectic Beaut	29.83
2020-06-29			None	Web Site Sales	Sunbell	72.44
2020-08-20			Fall Kite Event	Web Site Sales	Doublers	1629.58
2020-08-09			Fall Kite Event	E-mail Coupon	Sunshine	60.32
2020-08-15			Fall Kite Event	Web Site Sales	V-Rang	36.17
2020-06-17			Festival of Flight	In Store Sales	Majectic Beaut	58.4
2020-08-03			Fall Kite Event	Web Site Sales	FlatTop	83.71
2020-08-09			Fall Kite Event	In Store Sales	V-Rang	235.88
2020-08-24			Fall Kite Event	Web Site Sales	Sunset	47.76
2020-06-11			Festival of Flight	In Store Sales	Quad	96.87
2020-07-04			None	In Store Sales	Sunshine	60.11
2020-06-12			Festival of Flight	In Store Sales	Quad	66.43
2020-08-26			Fall Kite Event	In Store Sales	Majectic Beaut	29.07
2020-08-11			Fall Kite Event	In Store Sales	Sunshine	40.41
2020-08-25			Fall Kite Event	Web Site Sales	Quad	66.04
2020-08-03			Fall Kite Event	In Store Sales	FlatTop	28.05
2020-06-24			Festival of Flight	E-mail Coupon	Sunshine	60.43
2020-08-14			Fall Kite Event	In Store Sales	Aspen	63.09
2020-08-29			Fall Kite Event	In Store Sales	Sunbell	24.12
2020-06-02			Festival of Flight	E-mail Coupon	Bellen	46.11
2020-06-14			Festival of Flight	Web Site Sales	Sunset	90.79
2020-07-14			None	In Store Sales	Majectic Beaut	60.48
2020-05-01			None	Web Site Sales	Bellen	69.27
2020-06-15			Festival of Flight	E-mail Coupon	FlatTop	353.19
2020-07-06			None	In Store Sales	Majectic Beaut	56.2
2020-07-04			None	Web Site Sales	Sunbell	72.91
2020-06-26			Festival of Flight	Web Site Sales	Crested Beaut	23.06
2020-06-04			Festival of Flight	Web Site Sales	Sunshine	40.16
2020-08-23			Fall Kite Event	E-mail Coupon	Sunshine	40.81
2020-08-15			Fall Kite Event	In Store Sales	Carlota	69.27
2020-05-11			None	In Store Sales	Sunshine	38.28
2020-06-19			Festival of Flight	Web Site Sales	Carlota	371.36
2020-06-03			Festival of Flight	Web Site Sales	V-Rang	36.41
2020-06-10			Festival of Flight	In Store Sales	Majectic Beaut	30.96
2020-08-27			Fall Kite Event	Web Site Sales	Aspen	60.33
2020-07-25			None	Web Site Sales	Bellen	44.83
2020-08-21			Fall Kite Event	Web Site Sales	Aspen	21.18
2020-06-04			Festival of Flight	Web Site Sales	Quad	64.23
2020-08-20			Fall Kite Event	Web Site Sales	Quad	66.1
2020-06-13			Festival of Flight	Web Site Sales	Bellen	23.82
2020-06-09			Festival of Flight	In Store Sales	Bellen	46.42
2020-06-09			Festival of Flight	Web Site Sales	Aspen	60.84
2020-06-14			Festival of Flight	Web Site Sales	Carlota	230.77
2020-08-17			Fall Kite Event	In Store Sales	Carlota	46.1
2020-08-02			Fall Kite Event	In Store Sales	Sunshine	40.31
2020-07-30			None	Web Site Sales	Bellen	46.44
2020-05-19			None	In Store Sales	Bellen	69.92
2020-08-08			Fall Kite Event	In Store Sales	Quad	99.88
2020-07-08			None	Web Site Sales	Quad	102.42
2020-05-03			None	Web Site Sales	Quad	33.2
2020-07-12			None	E-mail Coupon	Bellen	23.69
2020-06-11			Festival of Flight	Web Site Sales	Carlota	69.89
2020-08-11			Fall Kite Event	In Store Sales	Aspen	60.59
2020-08-15			Fall Kite Event	In Store Sales	Quad	33.63
2020-07-04			None	E-mail Coupon	V-Rang	18.03
2020-08-26			Fall Kite Event	In Store Sales	Crested Beaut	50.79
2020-08-18			Fall Kite Event	E-mail Coupon	Sunshine	40.17
2020-08-17			Fall Kite Event	In Store Sales	Sunshine	60.31
2020-07-28			None	Web Site Sales	V-Rang	291.74
2020-06-10			Festival of Flight	Web Site Sales	Sunbell	479.83
2020-06-04			Festival of Flight	In Store Sales	Bellen	46.96
2020-06-25			Festival of Flight	In Store Sales	Bellen	414.39
2020-06-16			Festival of Flight	In Store Sales	Sunshine	20.09
2020-08-05			Fall Kite Event	In Store Sales	Majectic Beaut	28.05
2020-08-27			Fall Kite Event	Web Site Sales	Bellen	69.24
2020-06-18			Festival of Flight	Web Site Sales	Bellen	46.02
2020-08-12			Fall Kite Event	Web Site Sales	Quad	99.06
2020-08-20			Fall Kite Event	In Store Sales	Quad	128.77
2020-08-13			Fall Kite Event	In Store Sales	Doublers	80.52
2020-06-30			None	E-mail Coupon	Bellen	46.66
2020-06-04			Festival of Flight	Web Site Sales	Quad	34.56
2020-08-20			Fall Kite Event	In Store Sales	FlatTop	83.26
2020-05-11			None	Web Site Sales	Sunbell	24.98
2020-07-31			None	Web Site Sales	Majectic Beaut	29.03
2020-08-14			Fall Kite Event	Web Site Sales	Sunshine	57.46
2020-06-18			Festival of Flight	Web Site Sales	Sunbell	50.96
2020-05-08			None	Web Site Sales	Crested Beaut	50.94
2020-05-16			None	In Store Sales	Sunshine	80.92
2020-07-29			None	In Store Sales	Majectic Beaut	627.74
2020-09-06			None	Web Site Sales	Quad	68.6
2020-08-18			Fall Kite Event	E-mail Coupon	Majectic Beaut	28.42
2020-06-25			Festival of Flight	Web Site Sales	Sunbell	24.63
2020-06-26			Festival of Flight	Web Site Sales	Bellen	69.85
2020-08-02			Fall Kite Event	In Store Sales	Sunset	357.01
2020-08-12			Fall Kite Event	Web Site Sales	Aspen	361.57
2020-07-31			None	In Store Sales	Bellen	46.48
2020-09-28			None	Web Site Sales	V-Rang	19.42
2020-06-22			Festival of Flight	Web Site Sales	Bellen	69.89
2020-08-04			Fall Kite Event	Web Site Sales	Majectic Beaut	29.71
2020-06-22			Festival of Flight	Web Site Sales	Quad	132.71
2020-06-10			Festival of Flight	E-mail Coupon	Carlota	46.05
2020-06-25			Festival of Flight	Web Site Sales	Quad	68.14
2020-05-07			None	In Store Sales	Quad	99.54
2020-08-31			None	In Store Sales	Quad	99.9
2020-06-21			Festival of Flight	Web Site Sales	Sunbell	69.7
2020-08-11			Fall Kite Event	In Store Sales	Quad	66.4
2020-05-27			None	E-mail Coupon	Sunshine	80.04
2020-08-14			Fall Kite Event	In Store Sales	V-Rang	57.55
2020-08-11			Fall Kite Event	Web Site Sales	Bellen	46.61
2020-08-14			Fall Kite Event	In Store Sales	Sunshine	20.64
2020-08-01			None	In Store Sales	Quad	68.99
2020-07-09			None	Web Site Sales	Carlota	69.37
2020-07-13			None	Web Site Sales	Doublers	80.55
2020-08-07			Fall Kite Event	In Store Sales	FlatTop	80.15
2020-06-30			None	Web Site Sales	Aspen	20.86
2020-07-08			None	In Store Sales	Sunbell	92.02
2020-06-14			Festival of Flight	Web Site Sales	Quad	136.16
2020-06-30			None	E-mail Coupon	Sunset	406.37
2020-06-30			None	Web Site Sales	Carlota	22.12
2020-06-14			Festival of Flight	Web Site Sales	Sunset	94.75
2020-06-07			Festival of Flight	Web Site Sales	Quad	99.43
2020-07-22			None	E-mail Coupon	Bellen	46.48
2020-08-10			Fall Kite Event	In Store Sales	Bellen	23.49
2020-06-19			Festival of Flight	In Store Sales	Sunshine	38.98
2020-08-26			Fall Kite Event	Web Site Sales	Quad	32.01
2020-08-01			None	In Store Sales	FlatTop	496.26
2020-08-17			Fall Kite Event	E-mail Coupon	Carlota	69.11
2020-06-09			Festival of Flight	In Store Sales	Carlota	46.92
2020-06-14			Festival of Flight	Web Site Sales	Sunshine	19.93
2020-06-30			None	Web Site Sales	V-Rang	57.54
2020-09-02			None	Web Site Sales	Sunshine	160.07
2020-09-04			None	E-mail Coupon	Quad	132.12
2020-06-29			None	In Store Sales	Sunshine	341.17
2020-05-04			None	Web Site Sales	Sunbell	23.93
2020-06-10			Festival of Flight	E-mail Coupon	Crested Beaut	50.36
2020-08-18			Fall Kite Event	In Store Sales	Quad	102.49
2020-06-16			Festival of Flight	Web Site Sales	Quad	66.41
2020-08-17			Fall Kite Event	In Store Sales	Majectic Beaut	28.58
2020-08-30			None	Web Site Sales	Sunset	24.26
2020-08-03			Fall Kite Event	In Store Sales	Crested Beaut	69.52
2020-08-14			Fall Kite Event	Web Site Sales	Sunbell	69.86
2020-06-07			Festival of Flight	In Store Sales	FlatTop	28.4
2020-08-20			Fall Kite Event	In Store Sales	Aspen	19.69
2020-06-17			Festival of Flight	Web Site Sales	V-Rang	38.35
2020-08-04			Fall Kite Event	In Store Sales	Aspen	42.8
2020-06-24			Festival of Flight	Web Site Sales	Sunbell	48.82
2020-06-14			Festival of Flight	In Store Sales	Aspen	57.91
2020-08-05			Fall Kite Event	In Store Sales	Aspen	60.43
2020-06-11			Festival of Flight	Web Site Sales	Carlota	70
2020-07-27			None	Web Site Sales	Sunbell	72.58
2020-06-25			Festival of Flight	In Store Sales	Quad	68.63
2020-06-22			Festival of Flight	In Store Sales	Bellen	23.17
2020-06-28			None	Web Site Sales	V-Rang	57.22
2020-06-05			Festival of Flight	Web Site Sales	Sunbell	96.2
2020-08-08			Fall Kite Event	In Store Sales	Carlota	69.31
2020-06-22			Festival of Flight	In Store Sales	Sunshine	60.43
2020-06-19			Festival of Flight	In Store Sales	Doublers	160
2020-08-23			Fall Kite Event	In Store Sales	Quad	68.37
2020-06-13			Festival of Flight	In Store Sales	FlatTop	28.39
2020-06-13			Festival of Flight	E-mail Coupon	FlatTop	80.81
2020-07-20			None	In Store Sales	Sunshine	60.74
2020-06-02			Festival of Flight	In Store Sales	Sunshine	40.72
2020-06-10			Festival of Flight	Web Site Sales	Carlota	23.63
2020-06-30			None	Web Site Sales	Quad	132.34
2020-06-25			Festival of Flight	Web Site Sales	Doublers	160.32
2020-06-21			Festival of Flight	In Store Sales	Quad	96.94
2020-06-16			Festival of Flight	E-mail Coupon	Crested Beaut	69.14
2020-08-27			Fall Kite Event	In Store Sales	Carlota	46.76
2020-08-16			Fall Kite Event	Web Site Sales	Quad	68.98
2020-06-02			Festival of Flight	Web Site Sales	Sunbell	100.9
2020-08-29			Fall Kite Event	In Store Sales	Bellen	46.46
2020-08-05			Fall Kite Event	In Store Sales	Bellen	69.53
2020-08-01			None	Web Site Sales	Quad	533.53
2020-06-18			Festival of Flight	Web Site Sales	Bellen	46.41
2020-08-13			Fall Kite Event	Web Site Sales	Bellen	46.26
2020-05-25			None	Web Site Sales	Crested Beaut	120.58
2020-06-04			Festival of Flight	E-mail Coupon	Carlota	46.63
2020-06-23			Festival of Flight	E-mail Coupon	Doublers	160.41
2020-08-18			Fall Kite Event	E-mail Coupon	Quad	128.77
2020-09-16			None	Web Site Sales	Quad	33.89
2020-05-03			None	Web Site Sales	Sunshine	20.48
2020-08-20			Fall Kite Event	In Store Sales	Quad	68.6
2020-07-21			None	In Store Sales	Sunbell	168.36
2020-05-21			None	In Store Sales	Quad	99.75
2020-07-25			None	Web Site Sales	Sunbell	24.32
2020-08-12			Fall Kite Event	E-mail Coupon	Majectic Beaut	90.31
2020-07-21			None	Web Site Sales	Sunbell	23.7
2020-09-22			None	Web Site Sales	Quad	66.59
2020-08-22			Fall Kite Event	Web Site Sales	Sunbell	25.01
2020-09-14			None	Web Site Sales	Quad	33.48
2020-05-11			None	Web Site Sales	Crested Beaut	48.88
2020-08-17			Fall Kite Event	In Store Sales	Quad	66.66
2020-06-15			Festival of Flight	Web Site Sales	V-Rang	38.66
2020-09-17			None	Web Site Sales	Bellen	46.28
2020-05-01			None	E-mail Coupon	Doublers	78.44
2020-06-25			Festival of Flight	Web Site Sales	FlatTop	80.99
2020-06-13			Festival of Flight	Web Site Sales	Quad	68.4
2020-09-15			None	Web Site Sales	Carlota	92.84
2020-08-08			Fall Kite Event	Web Site Sales	Quad	136.28
2020-06-13			Festival of Flight	Web Site Sales	Quad	66.4
2020-08-25			Fall Kite Event	In Store Sales	Sunshine	19.01
2020-07-01			None	Web Site Sales	Crested Beaut	72.96
2020-07-26			None	In Store Sales	Bellen	46.81
2020-06-06			Festival of Flight	In Store Sales	Aspen	40.93
2020-08-17			Fall Kite Event	Web Site Sales	Sunbell	72.83
2020-06-21			Festival of Flight	In Store Sales	Sunset	24.73
2020-06-21			Festival of Flight	Web Site Sales	Majectic Beaut	112.69
2020-08-22			Fall Kite Event	In Store Sales	Quad	68.27
2020-08-07			Fall Kite Event	E-mail Coupon	Bellen	44.6
2020-08-04			Fall Kite Event	E-mail Coupon	Crested Beaut	72.05
2020-06-18			Festival of Flight	In Store Sales	Quad	66.4
2020-08-07			Fall Kite Event	In Store Sales	FlatTop	53.25
2020-08-31			None	Web Site Sales	Carlota	46.41
2020-05-30			None	E-mail Coupon	Majectic Beaut	58.09
2020-06-20			Festival of Flight	E-mail Coupon	Crested Beaut	75.83
2020-06-01			Festival of Flight	E-mail Coupon	Bellen	46.56
2020-08-25			Fall Kite Event	Web Site Sales	Majectic Beaut	116.59
2020-08-28			Fall Kite Event	In Store Sales	FlatTop	28.4
2020-08-29			Fall Kite Event	In Store Sales	Carlota	523.75
2020-06-17			Festival of Flight	Web Site Sales	Majectic Beaut	84.91
2020-06-11			Festival of Flight	Web Site Sales	Carlota	46.03
2020-08-13			Fall Kite Event	In Store Sales	Crested Beaut	404.81
2020-06-11			Festival of Flight	E-mail Coupon	Sunbell	48.73
2020-07-13			None	E-mail Coupon	Sunbell	25.89
2020-08-09			Fall Kite Event	Web Site Sales	Bellen	23.14
2020-06-24			Festival of Flight	In Store Sales	Carlota	66.36
2020-08-25			Fall Kite Event	Web Site Sales	V-Rang	36.28
2020-06-01			Festival of Flight	Web Site Sales	Sunset	118.63
2020-08-17			Fall Kite Event	In Store Sales	Majectic Beaut	87.53
2020-06-08			Festival of Flight	Web Site Sales	Aspen	40.99
2020-09-27			None	In Store Sales	Quad	99.79
2020-08-08			Fall Kite Event	In Store Sales	Crested Beaut	50.16
2020-08-18			Fall Kite Event	Web Site Sales	Aspen	57.47
2020-08-16			Fall Kite Event	In Store Sales	Sunbell	24.48
2020-08-04			Fall Kite Event	Web Site Sales	Majectic Beaut	58.42
2020-08-16			Fall Kite Event	E-mail Coupon	Sunbell	24.93
2020-08-25			Fall Kite Event	E-mail Coupon	Sunbell	23.15
2020-08-18			Fall Kite Event	In Store Sales	Doublers	234.43
2020-06-29			None	Web Site Sales	Sunset	94.96
2020-08-05			Fall Kite Event	In Store Sales	Crested Beaut	69.39
2020-07-16			None	In Store Sales	Quad	102.68
2020-06-24			Festival of Flight	Web Site Sales	Sunset	23.13
2020-06-14			Festival of Flight	In Store Sales	Sunshine	40.2
2020-06-25			Festival of Flight	Web Site Sales	Quad	68.86
2020-06-23			Festival of Flight	In Store Sales	Sunbell	72.83
2020-08-19			Fall Kite Event	In Store Sales	Aspen	63.23
2020-07-16			None	In Store Sales	Sunshine	200.3
2020-06-15			Festival of Flight	In Store Sales	Sunbell	46.68
2020-06-03			Festival of Flight	In Store Sales	Sunbell	46.76
2020-08-20			Fall Kite Event	In Store Sales	Carlota	69.9
2020-08-07			Fall Kite Event	In Store Sales	Sunbell	46.68
2020-08-03			Fall Kite Event	In Store Sales	Quad	64.23
2020-05-13			None	E-mail Coupon	Carlota	46.17
2020-08-25			Fall Kite Event	E-mail Coupon	FlatTop	27.69
2020-08-09			Fall Kite Event	E-mail Coupon	FlatTop	55.55
2020-09-09			None	E-mail Coupon	FlatTop	83.78
2020-08-21			Fall Kite Event	In Store Sales	Sunshine	398.41
2020-07-08			None	Web Site Sales	Bellen	88.12
2020-06-13			Festival of Flight	In Store Sales	Bellen	46.64
2020-07-18			None	In Store Sales	Aspen	60.57
2020-08-27			Fall Kite Event	E-mail Coupon	Carlota	22.97
2020-06-11			Festival of Flight	Web Site Sales	Sunshine	133.43
2020-08-07			Fall Kite Event	E-mail Coupon	Sunshine	20.77
2020-08-31			None	In Store Sales	Quad	33.91
2020-07-13			None	Web Site Sales	Quad	96.68
2020-08-11			Fall Kite Event	In Store Sales	Majectic Beaut	58.23
2020-08-17			Fall Kite Event	In Store Sales	V-Rang	36.07
2020-06-02			Festival of Flight	Web Site Sales	Sunshine	324.43
2020-06-07			Festival of Flight	In Store Sales	Doublers	312.2
2020-05-19			None	In Store Sales	Carlota	44.81
2020-08-26			Fall Kite Event	In Store Sales	Bellen	22.71
2020-06-13			Festival of Flight	Web Site Sales	Sunbell	25.65
2020-05-12			None	In Store Sales	Quad	68.12
2020-06-09			Festival of Flight	Web Site Sales	Quad	33.91
2020-09-16			None	E-mail Coupon	Sunbell	48.56
2020-08-23			Fall Kite Event	In Store Sales	Quad	33.31
2020-06-08			Festival of Flight	In Store Sales	Aspen	40.55
2020-08-13			Fall Kite Event	In Store Sales	Aspen	180.99
2020-09-16			None	In Store Sales	Bellen	46.96
2020-08-18			Fall Kite Event	In Store Sales	Sunbell	72.2
2020-09-01			None	In Store Sales	Crested Beaut	25.98
2020-06-29			None	E-mail Coupon	Sunset	71.83
2020-06-17			Festival of Flight	Web Site Sales	Sunbell	72.12
2020-07-15			None	Web Site Sales	Doublers	160.36
2020-07-20			None	E-mail Coupon	Crested Beaut	72.63
2020-06-21			Festival of Flight	Web Site Sales	Sunshine	20.15
2020-08-01			None	Web Site Sales	Crested Beaut	25.32
2020-06-01			Festival of Flight	E-mail Coupon	Carlota	46.04
2020-08-15			Fall Kite Event	E-mail Coupon	Sunset	24
2020-06-11			Festival of Flight	In Store Sales	Sunshine	341.53
2020-06-22			Festival of Flight	Web Site Sales	Sunshine	20.79
2020-06-24			Festival of Flight	In Store Sales	Aspen	319.83
2020-06-22			Festival of Flight	In Store Sales	Quad	33.42
2020-06-23			Festival of Flight	In Store Sales	Carlota	46.2
2020-06-15			Festival of Flight	Web Site Sales	Quad	99.72
2020-06-02			Festival of Flight	In Store Sales	Carlota	46.08
2020-08-28			Fall Kite Event	In Store Sales	Sunbell	50.74
2020-06-29			None	In Store Sales	Sunshine	80.91
2020-08-21			Fall Kite Event	Web Site Sales	Carlota	69.49
2020-08-25			Fall Kite Event	In Store Sales	Carlota	501.98
2020-06-13			Festival of Flight	Web Site Sales	Sunbell	75.58
2020-08-09			Fall Kite Event	In Store Sales	Sunshine	20.76
2020-08-18			Fall Kite Event	Web Site Sales	Sunset	47.63
2020-08-18			Fall Kite Event	In Store Sales	Sunbell	72.35
2020-08-12			Fall Kite Event	Web Site Sales	Sunset	24.48
2020-06-14			Festival of Flight	Web Site Sales	Carlota	69.56
2020-08-18			Fall Kite Event	In Store Sales	Majectic Beaut	30.02
2020-06-02			Festival of Flight	Web Site Sales	Quad	272.19
2020-08-18			Fall Kite Event	Web Site Sales	Quad	33.22
2020-08-20			Fall Kite Event	In Store Sales	Sunbell	75.99
2020-06-18			Festival of Flight	E-mail Coupon	Sunset	71.26
2020-06-12			Festival of Flight	Web Site Sales	Bellen	46.42
2020-06-22			Festival of Flight	In Store Sales	Quad	34.99
2020-08-09			Fall Kite Event	In Store Sales	V-Rang	38.9
2020-06-19			Festival of Flight	Web Site Sales	Aspen	40.29
2020-06-02			Festival of Flight	Web Site Sales	Sunset	24.8
2020-08-01			None	In Store Sales	Sunbell	415.94
2020-08-06			Fall Kite Event	In Store Sales	Majectic Beaut	28.44
2020-06-04			Festival of Flight	In Store Sales	Bellen	46.69
2020-08-19			Fall Kite Event	In Store Sales	Sunbell	25.73
2020-06-04			Festival of Flight	Web Site Sales	Sunbell	48.45
2020-06-04			Festival of Flight	E-mail Coupon	Sunshine	38.01
2020-06-09			Festival of Flight	Web Site Sales	Carlota	46.92
2020-06-04			Festival of Flight	Web Site Sales	FlatTop	55.24
2020-05-03			None	In Store Sales	Majectic Beaut	60.46
2020-08-21			Fall Kite Event	In Store Sales	Bellen	23.86
2020-08-10			Fall Kite Event	In Store Sales	Bellen	46.98
2020-07-20			None	Web Site Sales	Quad	64.6
2020-08-21			Fall Kite Event	Web Site Sales	Aspen	40.39
2020-08-22			Fall Kite Event	In Store Sales	Quad	132.84
2020-08-09			Fall Kite Event	Web Site Sales	Sunset	23.43
2020-06-04			Festival of Flight	Web Site Sales	Quad	102.39
2020-08-28			Fall Kite Event	In Store Sales	Quad	33.28
2020-06-28			None	In Store Sales	Doublers	160.41
2020-06-11			Festival of Flight	In Store Sales	Sunshine	20.44
2020-06-28			None	Web Site Sales	Quad	68.74
2020-06-01			Festival of Flight	In Store Sales	Sunbell	75.5
2020-06-09			Festival of Flight	Web Site Sales	FlatTop	28.21
2020-08-09			Fall Kite Event	E-mail Coupon	Quad	102.96
2020-08-09			Fall Kite Event	In Store Sales	Sunshine	40.02
2020-06-17			Festival of Flight	In Store Sales	Bellen	69.61
2020-05-26			None	Web Site Sales	Carlota	92.89
2020-06-03			Festival of Flight	E-mail Coupon	Sunshine	40.26
2020-08-14			Fall Kite Event	In Store Sales	Aspen	40.96
2020-06-02			Festival of Flight	Web Site Sales	Sunbell	72.8
2020-08-24			Fall Kite Event	In Store Sales	Bellen	283.85
2020-05-05			None	Web Site Sales	Aspen	20.98
2020-06-25			Festival of Flight	In Store Sales	Quad	99.44
2020-06-07			Festival of Flight	Web Site Sales	Bellen	23.76
2020-08-29			Fall Kite Event	E-mail Coupon	Bellen	66.69
2020-07-31			None	Web Site Sales	Sunset	469.93
2020-06-30			None	Web Site Sales	Bellen	327.75
2020-08-27			Fall Kite Event	Web Site Sales	Bellen	46.38
2020-08-15			Fall Kite Event	In Store Sales	Sunbell	25.02
2020-06-13			Festival of Flight	Web Site Sales	Bellen	262.81
2020-08-23			Fall Kite Event	In Store Sales	Bellen	46.27
2020-05-08			None	In Store Sales	Sunset	23.24
2020-06-25			Festival of Flight	Web Site Sales	Carlota	46.08
2020-08-27			Fall Kite Event	E-mail Coupon	Quad	102.02
2020-06-20			Festival of Flight	Web Site Sales	Carlota	23.72
2020-06-22			Festival of Flight	Web Site Sales	Bellen	46.37
2020-08-19			Fall Kite Event	In Store Sales	Carlota	46.76
2020-06-14			Festival of Flight	In Store Sales	Sunset	71.87
2020-08-27			Fall Kite Event	In Store Sales	Sunbell	72.51
2020-06-02			Festival of Flight	Web Site Sales	Sunshine	20.45
2020-05-29			None	In Store Sales	Majectic Beaut	87.03
2020-07-03			None	Web Site Sales	Majectic Beaut	29.32
2020-08-11			Fall Kite Event	In Store Sales	Sunshine	19.4
2020-06-29			None	Web Site Sales	Carlota	69.73
2020-06-16			Festival of Flight	Web Site Sales	FlatTop	80.01
2020-06-24			Festival of Flight	E-mail Coupon	Crested Beaut	46.23
2020-08-05			Fall Kite Event	In Store Sales	Sunshine	40.41
2020-08-27			Fall Kite Event	In Store Sales	Sunshine	40.3
2020-08-30			None	In Store Sales	Sunset	94.64
2020-06-15			Festival of Flight	In Store Sales	Sunset	68.8
2020-08-03			Fall Kite Event	In Store Sales	Bellen	414.19
2020-06-23			Festival of Flight	In Store Sales	Quad	64.96
2020-06-09			Festival of Flight	In Store Sales	Majectic Beaut	60.08
2020-06-25			Festival of Flight	Web Site Sales	Sunbell	96.57
2020-08-30			None	In Store Sales	Bellen	480.04
2020-07-22			None	In Store Sales	Sunset	47.34
2020-05-30			None	In Store Sales	Sunshine	60.52
2020-05-25			None	Web Site Sales	FlatTop	83.73
2020-06-04			Festival of Flight	In Store Sales	Bellen	23.96
2020-08-03			Fall Kite Event	In Store Sales	Sunset	45.47
2020-06-23			Festival of Flight	Web Site Sales	Quad	99.9
2020-08-15			Fall Kite Event	Web Site Sales	Majectic Beaut	58.08
2020-08-25			Fall Kite Event	In Store Sales	Crested Beaut	92.98
2020-05-24			None	Web Site Sales	Aspen	40.12
2020-06-03			Festival of Flight	E-mail Coupon	Sunset	71.85
2020-05-29			None	Web Site Sales	Aspen	40.13
2020-06-18			Festival of Flight	In Store Sales	Crested Beaut	72.27
2020-08-15			Fall Kite Event	Web Site Sales	Majectic Beaut	87.88
2020-06-02			Festival of Flight	In Store Sales	Majectic Beaut	56.63
2020-08-04			Fall Kite Event	Web Site Sales	Quad	69
2020-08-13			Fall Kite Event	In Store Sales	Carlota	46.63
2020-06-23			Festival of Flight	E-mail Coupon	Sunbell	50.15
2020-05-27			None	E-mail Coupon	Quad	690.75
2020-09-20			None	E-mail Coupon	Quad	33.57
2020-08-26			Fall Kite Event	In Store Sales	Majectic Beaut	87.35
2020-09-17			None	Web Site Sales	Sunbell	24.6
2020-07-10			None	In Store Sales	Carlota	69.27
2020-06-23			Festival of Flight	Web Site Sales	Majectic Beaut	30.84
2020-09-01			None	Web Site Sales	Carlota	44.48
2020-06-04			Festival of Flight	Web Site Sales	Majectic Beaut	58.59
2020-08-06			Fall Kite Event	In Store Sales	Sunshine	40.05
2020-08-07			Fall Kite Event	Web Site Sales	Quad	66.22
2020-08-14			Fall Kite Event	In Store Sales	Quad	33.32
2020-08-09			Fall Kite Event	In Store Sales	Crested Beaut	25.17
2020-08-09			Fall Kite Event	In Store Sales	Quad	33.95
2020-08-26			Fall Kite Event	Web Site Sales	Sunshine	284
2020-08-30			None	In Store Sales	Sunbell	48.02
2020-08-31			None	Web Site Sales	Carlota	46.97
2020-08-07			Fall Kite Event	In Store Sales	Aspen	42.99
2020-07-18			None	In Store Sales	Sunbell	23.58
2020-06-20			Festival of Flight	In Store Sales	Bellen	46.4
2020-06-13			Festival of Flight	E-mail Coupon	Quad	68.34
2020-06-20			Festival of Flight	Web Site Sales	Sunshine	60.07
2020-05-11			None	Web Site Sales	Sunset	71.83
2020-06-02			Festival of Flight	Web Site Sales	Doublers	240.1
2020-06-11			Festival of Flight	In Store Sales	Carlota	22.44
2020-09-04			None	Web Site Sales	Aspen	42.15
2020-06-23			Festival of Flight	In Store Sales	Sunbell	72.52
2020-05-03			None	In Store Sales	Quad	68.26
2020-06-23			Festival of Flight	In Store Sales	Quad	32.01
2020-05-02			None	In Store Sales	V-Rang	72.31
2020-09-03			None	Web Site Sales	Quad	470.77
2020-08-07			Fall Kite Event	In Store Sales	Aspen	57.24
2020-07-22			None	Web Site Sales	Quad	66.71
2020-06-08			Festival of Flight	In Store Sales	Bellen	69.79
2020-09-13			None	Web Site Sales	V-Rang	38.29
2020-08-09			Fall Kite Event	In Store Sales	Sunset	47.93
2020-06-22			Festival of Flight	Web Site Sales	Sunset	24.43
2020-08-13			Fall Kite Event	In Store Sales	Carlota	92.76
2020-07-23			None	Web Site Sales	Aspen	63.13
2020-08-30			None	In Store Sales	Carlota	69.24
2020-06-29			None	Web Site Sales	Doublers	80.29
2020-08-30			None	In Store Sales	Bellen	46.12
2020-08-01			None	In Store Sales	Bellen	69.86
2020-06-12			Festival of Flight	In Store Sales	Bellen	23.11
2020-06-08			Festival of Flight	E-mail Coupon	Bellen	46.45
2020-08-05			Fall Kite Event	In Store Sales	Quad	132.67
2020-08-01			None	E-mail Coupon	V-Rang	18.21
2020-08-14			Fall Kite Event	In Store Sales	FlatTop	27.74
2020-06-27			Festival of Flight	Web Site Sales	Aspen	63
2020-06-01			Festival of Flight	In Store Sales	Sunshine	60.92
2020-08-27			Fall Kite Event	In Store Sales	Majectic Beaut	56.24
2020-07-14			None	Web Site Sales	Quad	33.38
2020-06-05			Festival of Flight	Web Site Sales	Sunset	90.6
2020-06-23			Festival of Flight	Web Site Sales	Majectic Beaut	60.79
2020-09-22			None	Web Site Sales	Sunshine	60.2
2020-06-11			Festival of Flight	E-mail Coupon	Carlota	23.66
2020-08-25			Fall Kite Event	In Store Sales	Crested Beaut	24.72
2020-06-22			Festival of Flight	In Store Sales	Crested Beaut	100.47
2020-06-11			Festival of Flight	In Store Sales	Sunset	47.49
2020-08-24			Fall Kite Event	E-mail Coupon	Sunbell	75.48
2020-08-02			Fall Kite Event	In Store Sales	Carlota	46.06
2020-06-30			None	Web Site Sales	Carlota	414.39
2020-06-04			Festival of Flight	In Store Sales	Majectic Beaut	29.66
2020-06-24			Festival of Flight	Web Site Sales	FlatTop	28.53
2020-08-17			Fall Kite Event	In Store Sales	Sunshine	19.03
2020-08-24			Fall Kite Event	In Store Sales	Quad	33.65
2020-06-02			Festival of Flight	Web Site Sales	Quad	136.55
2020-06-12			Festival of Flight	Web Site Sales	Sunshine	38.06
2020-08-18			Fall Kite Event	In Store Sales	Sunbell	72.52
2020-08-28			Fall Kite Event	In Store Sales	Sunbell	48.48
2020-07-17			None	In Store Sales	Crested Beaut	25.29
2020-09-20			None	In Store Sales	Doublers	80.05
2020-06-18			Festival of Flight	Web Site Sales	Quad	66.28
2020-06-27			Festival of Flight	In Store Sales	Sunset	68.69
2020-06-29			None	Web Site Sales	Doublers	560.79
2020-08-17			Fall Kite Event	E-mail Coupon	Carlota	23.09
2020-09-11			None	In Store Sales	Quad	64.71
2020-06-09			Festival of Flight	E-mail Coupon	Carlota	46.35
2020-06-16			Festival of Flight	In Store Sales	Bellen	46.98
2020-06-27			Festival of Flight	In Store Sales	Majectic Beaut	87.02
2020-06-09			Festival of Flight	Web Site Sales	Crested Beaut	75.1
2020-08-05			Fall Kite Event	In Store Sales	Aspen	40.62
2020-06-17			Festival of Flight	Web Site Sales	Quad	99.85
2020-06-22			Festival of Flight	Web Site Sales	Sunset	225.97
2020-08-21			Fall Kite Event	Web Site Sales	Bellen	46.73
2020-06-15			Festival of Flight	In Store Sales	V-Rang	57.16
2020-06-25			Festival of Flight	Web Site Sales	Majectic Beaut	84.71
2020-06-21			Festival of Flight	In Store Sales	Bellen	69.1
2020-08-23			Fall Kite Event	Web Site Sales	FlatTop	80.28
2020-06-24			Festival of Flight	In Store Sales	Carlota	23.35
2020-08-18			Fall Kite Event	E-mail Coupon	Bellen	69.05
2020-08-14			Fall Kite Event	In Store Sales	Majectic Beaut	90.02
2020-08-12			Fall Kite Event	Web Site Sales	Carlota	46.1
2020-08-04			Fall Kite Event	In Store Sales	Sunshine	40.34
2020-09-17			None	Web Site Sales	Bellen	69.17
2020-06-27			Festival of Flight	In Store Sales	V-Rang	18.64
2020-08-29			Fall Kite Event	Web Site Sales	Bellen	46.96
2020-08-14			Fall Kite Event	In Store Sales	Sunshine	40.7
2020-06-14			Festival of Flight	Web Site Sales	Sunshine	40.7
2020-07-14			None	Web Site Sales	Quad	102.43
2020-09-08			None	In Store Sales	V-Rang	54.38
2020-08-06			Fall Kite Event	In Store Sales	Quad	34.82
2020-06-16			Festival of Flight	Web Site Sales	Sunset	47.03
2020-08-04			Fall Kite Event	In Store Sales	Sunshine	38.76
2020-07-04			None	In Store Sales	Quad	68.01
2020-08-27			Fall Kite Event	In Store Sales	Crested Beaut	50.33
2020-08-23			Fall Kite Event	E-mail Coupon	Quad	132.98
2020-06-29			None	Web Site Sales	Bellen	46.1
2020-06-10			Festival of Flight	Web Site Sales	Quad	66.93
2020-06-06			Festival of Flight	In Store Sales	V-Rang	54.87
2020-06-06			Festival of Flight	In Store Sales	Sunbell	25.43
2020-06-28			None	Web Site Sales	Sunbell	69.27
2020-06-23			Festival of Flight	In Store Sales	Bellen	23.82
2020-08-23			Fall Kite Event	In Store Sales	Quad	102.75
2020-08-23			Fall Kite Event	Web Site Sales	Quad	34.23
2020-06-04			Festival of Flight	Web Site Sales	Sunbell	75.91
2020-06-26			Festival of Flight	E-mail Coupon	Sunbell	46.15
2020-06-27			Festival of Flight	Web Site Sales	Quad	96.52
2020-06-28			None	Web Site Sales	Sunshine	38.51
2020-07-06			None	Web Site Sales	Sunshine	60.2
2020-08-30			None	In Store Sales	Bellen	23.8
2020-07-23			None	Web Site Sales	Majectic Beaut	87.02
2020-08-08			Fall Kite Event	Web Site Sales	Carlota	69.62
2020-05-05			None	In Store Sales	Majectic Beaut	116.21
2020-06-12			Festival of Flight	E-mail Coupon	Quad	68.21
2020-06-03			Festival of Flight	Web Site Sales	Bellen	46.23
2020-06-07			Festival of Flight	In Store Sales	FlatTop	53.94
2020-06-21			Festival of Flight	Web Site Sales	Sunshine	60.66
2020-06-02			Festival of Flight	Web Site Sales	Bellen	69.9
2020-06-19			Festival of Flight	Web Site Sales	Sunbell	50.75
2020-06-04			Festival of Flight	In Store Sales	Quad	99.3
2020-08-11			Fall Kite Event	In Store Sales	Carlota	69.71
2020-06-24			Festival of Flight	Web Site Sales	Sunbell	72.2
2020-06-09			Festival of Flight	Web Site Sales	Quad	102.32
2020-06-09			Festival of Flight	In Store Sales	Crested Beaut	46.4
2020-06-27			Festival of Flight	In Store Sales	Sunbell	46.25
2020-08-07			Fall Kite Event	E-mail Coupon	Quad	533.23
2020-06-05			Festival of Flight	Web Site Sales	Quad	102.77
2020-06-28			None	E-mail Coupon	Carlota	44.96
2020-06-07			Festival of Flight	Web Site Sales	Aspen	42.5
2020-08-05			Fall Kite Event	Web Site Sales	Carlota	22.7
2020-08-15			Fall Kite Event	In Store Sales	Bellen	501.12
2020-06-04			Festival of Flight	In Store Sales	Bellen	458.34
2020-08-04			Fall Kite Event	In Store Sales	Sunbell	25.66
2020-09-08			None	Web Site Sales	Sunbell	24.7
2020-08-02			Fall Kite Event	In Store Sales	Carlota	23.27
2020-06-01			Festival of Flight	In Store Sales	Quad	64.07
2020-06-21			Festival of Flight	In Store Sales	Quad	66.5
2020-06-22			Festival of Flight	In Store Sales	Quad	66.82
2020-09-26			None	In Store Sales	Crested Beaut	75.4
2020-08-25			Fall Kite Event	E-mail Coupon	Carlota	23.43
2020-08-20			Fall Kite Event	In Store Sales	Sunset	71.92
2020-07-31			None	In Store Sales	Sunset	45.1
2020-08-08			Fall Kite Event	E-mail Coupon	Carlota	88.83
2020-09-09			None	Web Site Sales	Quad	132.11
2020-08-15			Fall Kite Event	In Store Sales	Bellen	23.08
2020-09-16			None	In Store Sales	Sunbell	23.16
2020-08-18			Fall Kite Event	In Store Sales	V-Rang	77
2020-08-17			Fall Kite Event	In Store Sales	Carlota	69.24
2020-08-27			Fall Kite Event	In Store Sales	Crested Beaut	24.88
2020-06-19			Festival of Flight	Web Site Sales	Bellen	92.03
2020-08-19			Fall Kite Event	E-mail Coupon	Quad	66.58
2020-06-24			Festival of Flight	Web Site Sales	Carlota	92.05
2020-08-04			Fall Kite Event	In Store Sales	Majectic Beaut	87.39
2020-08-08			Fall Kite Event	Web Site Sales	Quad	66.68
2020-08-20			Fall Kite Event	E-mail Coupon	Carlota	46.56
2020-06-19			Festival of Flight	In Store Sales	V-Rang	54.93
2020-08-05			Fall Kite Event	In Store Sales	Carlota	69.95
2020-08-02			Fall Kite Event	Web Site Sales	Crested Beaut	72.17
2020-06-02			Festival of Flight	E-mail Coupon	Crested Beaut	46.11
2020-08-27			Fall Kite Event	Web Site Sales	Quad	102.25
2020-06-04			Festival of Flight	Web Site Sales	Sunshine	60.12
2020-06-25			Festival of Flight	E-mail Coupon	Quad	66.65
2020-08-29			Fall Kite Event	In Store Sales	Quad	96.89
2020-08-17			Fall Kite Event	In Store Sales	Majectic Beaut	58.86
2020-09-11			None	Web Site Sales	Quad	64.95
2020-07-01			None	In Store Sales	Aspen	21.99
2020-06-01			Festival of Flight	Web Site Sales	Carlota	69.42
2020-08-15			Fall Kite Event	Web Site Sales	Sunset	45.47
2020-06-08			Festival of Flight	Web Site Sales	Aspen	60.53
2020-06-29			None	E-mail Coupon	Sunset	47.91
2020-08-21			Fall Kite Event	In Store Sales	Aspen	42.12
2020-06-14			Festival of Flight	In Store Sales	Bellen	66.71
2020-06-16			Festival of Flight	In Store Sales	Bellen	23.54
2020-08-25			Fall Kite Event	Web Site Sales	Sunbell	48.62
2020-09-19			None	Web Site Sales	Sunset	335.54
2020-09-07			None	In Store Sales	Sunshine	60.98
2020-08-01			None	In Store Sales	Crested Beaut	50.06
2020-06-24			Festival of Flight	Web Site Sales	Carlota	69.79
2020-06-30			None	Web Site Sales	Crested Beaut	72.46
2020-07-15			None	Web Site Sales	Sunshine	20.22
2020-06-22			Festival of Flight	Web Site Sales	Sunshine	200.6
2020-08-15			Fall Kite Event	Web Site Sales	Crested Beaut	75.21
2020-05-20			None	Web Site Sales	Carlota	523.05
2020-06-21			Festival of Flight	E-mail Coupon	Sunshine	40.67
2020-08-07			Fall Kite Event	In Store Sales	Bellen	22.7
2020-06-01			Festival of Flight	In Store Sales	Sunbell	96.37
2020-06-29			None	In Store Sales	Carlota	44.37
2020-08-12			Fall Kite Event	Web Site Sales	FlatTop	83.67
2020-08-25			Fall Kite Event	In Store Sales	Bellen	46.13
2020-08-24			Fall Kite Event	Web Site Sales	Sunbell	48.38
2020-08-12			Fall Kite Event	In Store Sales	Sunset	24.64
2020-08-19			Fall Kite Event	Web Site Sales	Sunshine	20.63
2020-07-03			None	In Store Sales	FlatTop	53.15
2020-08-24			Fall Kite Event	E-mail Coupon	Crested Beaut	24.92
2020-08-27			Fall Kite Event	In Store Sales	Sunshine	60.52
2020-08-04			Fall Kite Event	Web Site Sales	Carlota	23.69
2020-08-01			None	In Store Sales	Crested Beaut	46.73
2020-08-25			Fall Kite Event	Web Site Sales	Crested Beaut	24.17
2020-08-16			Fall Kite Event	In Store Sales	Sunshine	40.9
2020-09-02			None	In Store Sales	V-Rang	36.74
2020-08-07			Fall Kite Event	In Store Sales	Bellen	46.13
2020-06-29			None	E-mail Coupon	Crested Beaut	48.61
2020-06-24			Festival of Flight	In Store Sales	Sunshine	20.59
2020-08-01			None	Web Site Sales	Bellen	66.54
2020-08-02			Fall Kite Event	In Store Sales	Sunset	68.37
2020-06-05			Festival of Flight	In Store Sales	V-Rang	54.7
2020-08-30			None	In Store Sales	Quad	66.97
2020-06-15			Festival of Flight	Web Site Sales	Aspen	63.42
2020-05-18			None	Web Site Sales	Sunshine	20.91
2020-08-07			Fall Kite Event	E-mail Coupon	Sunset	24.21
2020-08-04			Fall Kite Event	In Store Sales	Aspen	84.38
2020-07-08			None	In Store Sales	Sunset	47.94
2020-05-25			None	Web Site Sales	Majectic Beaut	87.2
2020-05-13			None	In Store Sales	Sunshine	40.75
2020-09-09			None	Web Site Sales	Sunshine	246.2
2020-06-15			Festival of Flight	Web Site Sales	Doublers	240.26
2020-08-25			Fall Kite Event	In Store Sales	Quad	99.9
2020-06-01			Festival of Flight	In Store Sales	Quad	68.92
2020-06-27			Festival of Flight	Web Site Sales	Crested Beaut	73
2020-08-29			Fall Kite Event	Web Site Sales	Sunshine	40.34
2020-06-23			Festival of Flight	In Store Sales	Sunset	71.72
2020-06-10			Festival of Flight	Web Site Sales	Sunset	71.67
2020-05-25			None	In Store Sales	Carlota	46.43
2020-07-26			None	Web Site Sales	Bellen	69.84
2020-06-25			Festival of Flight	Web Site Sales	Carlota	69.4
2020-08-03			Fall Kite Event	Web Site Sales	Quad	66.34
2020-06-04			Festival of Flight	E-mail Coupon	Quad	68.95
2020-06-28			None	In Store Sales	Sunshine	38.36
2020-08-10			Fall Kite Event	In Store Sales	Bellen	23.91
2020-07-08			None	Web Site Sales	Majectic Beaut	58.61
2020-06-08			Festival of Flight	Web Site Sales	Majectic Beaut	87.15
2020-05-01			None	Web Site Sales	FlatTop	83.4
2020-08-29			Fall Kite Event	In Store Sales	Majectic Beaut	331.02
2020-08-28			Fall Kite Event	E-mail Coupon	Quad	96.6
2020-06-08			Festival of Flight	E-mail Coupon	Majectic Beaut	58.37
2020-06-20			Festival of Flight	Web Site Sales	Bellen	23.78
2020-06-28			None	Web Site Sales	FlatTop	277.32
2020-06-18			Festival of Flight	Web Site Sales	Quad	33.33
2020-06-14			Festival of Flight	Web Site Sales	Sunbell	24.9
2020-08-22			Fall Kite Event	Web Site Sales	Bellen	66.78
2020-06-13			Festival of Flight	Web Site Sales	FlatTop	27.75
2020-06-04			Festival of Flight	Web Site Sales	Bellen	23.48
2020-06-13			Festival of Flight	Web Site Sales	Majectic Beaut	28.71
2020-08-30			None	Web Site Sales	Sunshine	60.09
2020-09-18			None	In Store Sales	Crested Beaut	75.36
2020-08-18			Fall Kite Event	E-mail Coupon	Doublers	78.58
2020-08-29			Fall Kite Event	In Store Sales	FlatTop	83.37
2020-06-02			Festival of Flight	Web Site Sales	Quad	136.15
2020-07-24			None	Web Site Sales	Majectic Beaut	29.8
2020-08-18			Fall Kite Event	Web Site Sales	Sunshine	38.01
2020-06-29			None	Web Site Sales	Bellen	46.46
[truncated: 1 more rows]
