# Supplementary material
Source: ML conference proceedings conference paper supplement (https://openreview.net/forum?id=tfyr2zRVoK)
Supplement: supplementary_material [file 3_FutureValue_gt1.xlsx]

## Sheet: Sheet1
No.	Present Value	Years	Annual Interest Rate	# Compound Periods
1	3150	6	0.18	1
2	8453	19	0.06	1
3	89305	13	0.11	1
4	227382	29	0.05	1
