# Supplementary material
Source: ML conference proceedings conference paper supplement (https://openreview.net/forum?id=tfyr2zRVoK)
Supplement: supplementary_material [file 3_IncomeStatement_gt1.xlsx]

## Sheet: Sheet1
Year	Net Sales	COGS	Gross Profit	Operating Expenses	Operating Profit	Tax Expense	Net Profit	Net Profit Margin
2015	74000	29855		37322		1364.6	5458.4	0.0737622
2016	93948	49396		44450		20.4	81.6	0.000868566
2017	86223	43511		40498		442.8	1771.2	0.0205421
2018	106125	61981		43552		118.4	473.6	0.00446266
2019	107581	59573		45691		463.4	1853.6	0.0172298
2020	106239	59987		42820		686.4	2745.6	0.0258436
2021	114379	68154		46076		29.8	119.2	0.00104215
2022	125242	79287		38307		1529.6	6118.4	0.0488526
