# Supplementary material
Source: ML conference proceedings conference paper supplement (https://openreview.net/forum?id=tfyr2zRVoK)
Supplement: supplementary_material [file 3_PeriodRate_gt1.xlsx]

## Sheet: Sheet2
Row Labels	Average of Annual Rate (%)
1	14.724
2	11.8676
3	15.496
5	12.6653
6	13.952
7	14.2093
8	15.882
Grand Total	13.5177

## Sheet: Sheet1
Annual Rate (%)	Period per year
11.25	2
7.776	6
15.496	6
9.32	2
18.584	6
18.198	8
17.812	5
14.724	2
16.268	7
13.566	8
14.338	5
9.706	5
13.566	2
9.706	5
13.566	7
7.776	7
15.11	5
15.496	3
14.724	1
12.794	7
9.32	5
16.268	7
10.478	2
18.584	7
