# Supplementary material
Source: ML conference proceedings conference paper supplement (https://openreview.net/forum?id=tfyr2zRVoK)
Supplement: supplementary_material [file 3_RampUpAndDown_gt1.xlsx]

## Sheet: Sheet1
Hanging mass (kilograms)	Acceleration of Block up Ramp	Hanging mass (kilograms)	Acceleration of Block down Ramp	Combined Data
0.4	-2.24047	0	-5.19723	Hanging mass (kilograms): 0.4, Acceleration of Block up Ramp: -2.2404726540447, Hanging mass (kilograms): 0, Acceleration of Block down Ramp: -5.19723484172112
0.42	-2.03465	0.02	-4.8077	Hanging mass (kilograms): 0.42, Acceleration of Block up Ramp: -2.03465260867641, Hanging mass (kilograms): 0.02, Acceleration of Block down Ramp: -4.80769627440369
0.44	-1.83575	0.04	-4.43788	Hanging mass (kilograms): 0.44, Acceleration of Block up Ramp: -1.83575088416084, Hanging mass (kilograms): 0.04, Acceleration of Block down Ramp: -4.43788117884917
0.46	-1.64342	0.06	-4.08633	Hanging mass (kilograms): 0.46, Acceleration of Block up Ramp: -1.64342442326562, Hanging mass (kilograms): 0.06, Acceleration of Block down Ramp: -4.08632855714919
0.48	-1.45735	0.08	-3.75172	Hanging mass (kilograms): 0.48, Acceleration of Block up Ramp: -1.45735248142391, Hanging mass (kilograms): 0.08, Acceleration of Block down Ramp: -3.7517182304709
0.5	-1.27723	0.1	-3.43285	Hanging mass (kilograms): 0.5, Acceleration of Block up Ramp: -1.27723484172112, Hanging mass (kilograms): 0.1, Acceleration of Block down Ramp: -3.43285427210687
0.52	-1.10279	0.12	-3.12865	Hanging mass (kilograms): 0.52, Acceleration of Block up Ramp: -1.10279019854441, Hanging mass (kilograms): 0.12, Acceleration of Block down Ramp: -3.12865072562166
0.54	-0.933755	0.14	-2.83812	Hanging mass (kilograms): 0.54, Acceleration of Block up Ramp: -0.933754691590235, Hanging mass (kilograms): 0.14, Acceleration of Block down Ramp: -2.8381192486414
0.56	-0.769881	0.16	-2.56036	Hanging mass (kilograms): 0.56, Acceleration of Block up Ramp: -0.769880574161377, Hanging mass (kilograms): 0.16, Acceleration of Block down Ramp: -2.56035838603389
0.58	-0.610935	0.18	-2.29454	Hanging mass (kilograms): 0.58, Acceleration of Block up Ramp: -0.610935001617597, Hanging mass (kilograms): 0.18, Acceleration of Block down Ramp: -2.29454422719445
0.6	-0.456699	0.2	-2.03992	Hanging mass (kilograms): 0.6, Acceleration of Block up Ramp: -0.456698927519558, Hanging mass (kilograms): 0.2, Acceleration of Block down Ramp: -2.03992224346405
0.62	-0.306966	0.22	-1.7958	Hanging mass (kilograms): 0.62, Acceleration of Block up Ramp: -0.306966096460878, Hanging mass (kilograms): 0.22, Acceleration of Block down Ramp: -1.79580013535138
0.64	-0.161542	0.24	-1.56154	Hanging mass (kilograms): 0.64, Acceleration of Block up Ramp: -0.16154212384993, Hanging mass (kilograms): 0.24, Acceleration of Block down Ramp: -1.56154154675843
0.66	-0.0202437	0.26	-1.33656	Hanging mass (kilograms): 0.66, Acceleration of Block up Ramp: -0.0202436540080869, Hanging mass (kilograms): 0.26, Acceleration of Block down Ramp: -1.33656052603054
0.68	0.117102	0.28	-1.12032	Hanging mass (kilograms): 0.68, Acceleration of Block up Ramp: 0.117102411082935, Hanging mass (kilograms): 0.28, Acceleration of Block down Ramp: -1.12031663232121
0.7	0.25066	0.3	-0.912311	Hanging mass (kilograms): 0.7, Acceleration of Block up Ramp: 0.250659619205929, Hanging mass (kilograms): 0.3, Acceleration of Block down Ramp: -0.912310601229374
0.72	0.380583	0.32	-0.71208	Hanging mass (kilograms): 0.72, Acceleration of Block up Ramp: 0.38058261758408, Hanging mass (kilograms): 0.32, Acceleration of Block down Ramp: -0.712080496533498
0.74	0.507018	0.34	-0.519198	Hanging mass (kilograms): 0.74, Acceleration of Block up Ramp: 0.507017750233958, Hanging mass (kilograms): 0.34, Acceleration of Block down Ramp: -0.519198285587929
0.76	0.630104	0.36	-0.333267	Hanging mass (kilograms): 0.76, Acceleration of Block up Ramp: 0.630103607846754, Hanging mass (kilograms): 0.36, Acceleration of Block down Ramp: -0.333266784946705
0.78	0.749972	0.38	-0.153917	Hanging mass (kilograms): 0.78, Acceleration of Block up Ramp: 0.749971534541568, Hanging mass (kilograms): 0.38, Acceleration of Block down Ramp: -0.153916930345878
0.8	0.866746	0.4	0.0191947	Hanging mass (kilograms): 0.8, Acceleration of Block up Ramp: 0.866746095386193, Hanging mass (kilograms): 0.4, Acceleration of Block down Ramp: 0.0191946684427462
0.82	0.980546	0.42	0.186388	Hanging mass (kilograms): 0.82, Acceleration of Block up Ramp: 0.980545508183821, Hanging mass (kilograms): 0.42, Acceleration of Block down Ramp: 0.18638792197364
0.84	1.09148	0.44	0.347961	Hanging mass (kilograms): 0.84, Acceleration of Block up Ramp: 1.09148204267207, Hanging mass (kilograms): 0.44, Acceleration of Block down Ramp: 0.347961234209377
0.86	1.19966	0.46	0.504193	Hanging mass (kilograms): 0.86, Acceleration of Block up Ramp: 1.19966238996807, Hanging mass (kilograms): 0.46, Acceleration of Block down Ramp: 0.504193279924924
0.88	1.30519	0.48	0.655345	Hanging mass (kilograms): 0.88, Acceleration of Block up Ramp: 1.30518800481509, Hanging mass (kilograms): 0.48, Acceleration of Block down Ramp: 0.655344608706633
0.9	1.40816	0.5	0.801659	Hanging mass (kilograms): 0.9, Acceleration of Block up Ramp: 1.40815542293854, Hanging mass (kilograms): 0.5, Acceleration of Block down Ramp: 0.801659094967327
0.92	1.50866	0.52	0.943365	Hanging mass (kilograms): 0.92, Acceleration of Block up Ramp: 1.50865655559796, Hanging mass (kilograms): 0.52, Acceleration of Block down Ramp: 0.943365250952094
0.94	1.60678	0.54	1.08068	Hanging mass (kilograms): 0.940000000000001, Acceleration of Block up Ramp: 1.60677896322402, Hanging mass (kilograms): 0.54, Acceleration of Block down Ramp: 1.080677417604
0.96	1.70261	0.56	1.2138	Hanging mass (kilograms): 0.960000000000001, Acceleration of Block up Ramp: 1.70260610985298, Hanging mass (kilograms): 0.56, Acceleration of Block down Ramp: 1.21379684634287
