# Supplementary material
Source: ML conference proceedings conference paper supplement (https://openreview.net/forum?id=tfyr2zRVoK)
Supplement: supplementary_material [file 3_ShippingCosts_gt1.xlsx]

## Sheet: Sheet1
Customers	Seattle	Milwaukee	Birmingham	Oakland	Difference
Chandler	1447	1830	1686	766	681
Glendale	1405	1870	1715	744	661
Mesa	1440	1816	1702	758	682
Scottsdale	1435	1818	1706	754	681
Little Rock	2277	743	373	1955	322
Antioch	796	2146	2299	36	760
Berkeley	795	2165	2319	4	791
Chula Vista	1258	2124	1996	499	759
Concord	785	2155	2319	25	760
Daly City	813	2183	2329	21	792
Fairfield	759	2129	2339	41	718
Hayward	816	2186	2306	20	796
Huntington Beach	1162	2063	2034	404	758
Long Beach	1156	2071	2042	398	758
Modesto	822	2158	2248	82	740
Santa Clara	834	2204	2290	44	790
Sunnyvale	835	2205	2293	44	791
Thousand Oaks	1143	2092	2062	385	758
