# Supplementary material
Source: ML conference proceedings conference paper supplement (https://openreview.net/forum?id=tfyr2zRVoK)
Supplement: supplementary_material [file 3_SmallBalanceSheet_gt1.xlsx]

## Sheet: Sheet1
Year	Current Assets	Fixed Assets	Other Assets	Assets	Current Liabilities	Long-term Liabilities	Debt Ratio	Owner's Equity	Liabilities & Owner's Equity
2014	185682	45500	3580	234762	6762	50000	0.241785	172474
2015	204527	43243	3520	251290	7653	50000	0.229428	196318
2016	219289	40840	3726	263855	8258	40000	0.182896	220797
2017	248718	38419	4011	291148	9133	40000	0.168756	239576
2018	264792	35854	4030	304676	9839	30000	0.130759	253852
2019	282148	33181	4088	319417	10585	30000	0.12706	282688
