# Supplementary material
Source: ML conference proceedings conference paper supplement (https://openreview.net/forum?id=tfyr2zRVoK)
Supplement: supplementary_material [file 3_SummerSales_gt1.xlsx]

## Sheet: Sheet1
Date	Days from Today	Month	Week	Promotion	Sales Channel	Product	Revenue ($)
2020-09-16	107	Sep	38	None	In Store Sales	Doublers	160.04
2020-07-01	184	Jul	27	None	In Store Sales	Sunshine	40.76
2020-06-02	213	Jun	23	None	E-mail Coupon	Crested Beaut	75.62
2020-05-15	231	May	20	None	Web Site Sales	Quad	99.29
2020-05-17	229	May	21	None	In Store Sales	Carlota	46.25
2020-06-10	205	Jun	24	None	In Store Sales	Majectic Beaut	28.28
2020-05-03	243	May	19	None	In Store Sales	Sunset	71.86
2020-05-13	233	May	20	None	Web Site Sales	Carlota	46.1
2020-09-02	121	Sep	36	None	Web Site Sales	Bellen	23.25
2020-07-03	182	Jul	27	None	Web Site Sales	Sunbell	50.9
2020-06-04	211	Jun	23	None	In Store Sales	Quad	66.85
2020-09-01	122	Sep	36	None	Web Site Sales	Sunset	24.68
2020-09-10	113	Sep	37	None	Web Site Sales	Carlota	89
2020-05-21	225	May	21	None	Web Site Sales	Quad	68.25
2020-07-26	159	Jul	31	None	In Store Sales	Sunshine	20.88
2020-05-12	234	May	20	None	Web Site Sales	Sunbell	24.75
2020-05-12	234	May	20	None	Web Site Sales	Doublers	80.95
2020-07-29	156	Jul	31	None	Web Site Sales	Quad	306.04
2020-05-18	228	May	21	None	Web Site Sales	Sunshine	20.01
2020-06-30	185	Jun	27	None	Web Site Sales	Carlota	69.85
2020-05-29	217	May	22	None	In Store Sales	Quad	99
2020-06-13	202	Jun	24	None	In Store Sales	Quad	68.39
2020-07-16	169	Jul	29	None	Web Site Sales	FlatTop	28.92
2020-07-29	156	Jul	31	None	In Store Sales	Carlota	46.85
2020-09-11	112	Sep	37	None	Web Site Sales	Aspen	479.13
2020-06-10	205	Jun	24	None	Web Site Sales	Sunset	47.35
2020-05-18	228	May	21	None	Web Site Sales	Sunbell	75.91
2020-06-28	187	Jun	27	None	Web Site Sales	Sunshine	60.4
2020-06-14	201	Jun	25	None	Web Site Sales	Sunbell	48.59
