# Supplementary material
Source: ML conference proceedings conference paper supplement (https://openreview.net/forum?id=tfyr2zRVoK)
Supplement: supplementary_material [file 3_Tax_gt1.xlsx]

## Sheet: Sheet2
Week	Sales
Week 1
Week 2
Week 3
Week 4
Week 5
Week 6
Week 7
Week 8
Week 9
Week 10

## Sheet: Sheet1
Week	Sales	Total Expenses Before Tax	Profit Before Tax	Tax Expense
Week 1	169864	17641
Week 2	112663	81793
Week 3	151992	131215
Week 4	156866	130607
Week 5	108855	9203
Week 6	145067	96964
Week 7	195791	105986
Week 8	144664	72052
Week 9	169962	19366
Week 10	168508	162750
