# Supplementary material
Source: ML conference proceedings conference paper supplement (https://openreview.net/forum?id=tfyr2zRVoK)
Supplement: supplementary_material [file 3_VelocityDisplacement_gt1.xlsx]

## Sheet: Sheet1
Displacement cm	Velocity m/s
200	21
400	35
600	46
800	57
1000	78
1200	83
1400	95
1600	110
1800	115
2000	124
2200	130
2400	145
2600	170
2800	180
3000	190
3200	192
3400	210
3600	222
3800	225
4000	240
