# Supplementary material
Source: ML conference proceedings conference paper supplement (https://openreview.net/forum?id=tfyr2zRVoK)
Supplement: supplementary_material [file 4_BoomerangSales_gt1.xlsx]

## Sheet: Sheet1
Date Time	Web Site	Product	Type	Quantity	Discount
2015-09-08 10:13:00	amazon.com	Aspen	Wholesale	33	0.165
2015-12-11 23:26:00	ebay.com	Yanaki	Wholesale	29	0.15
2015-12-19 18:10:56	amazon.com	Bellen	Retail	3	0.019
2015-08-23 12:55:00	ebay.com	Quad	Wholesale	36	0.15
2015-07-09 05:02:58	coloradoboomerangs.com	Crested Beaut	Wholesale	38	0.15
2015-06-30 16:40:56	ebay.com	Manu LD	Retail	4	0
2015-07-01 13:16:01	coloradoboomerangs.com	Bellen	Retail	4	0
2015-08-02 04:06:57	gel-boomerang.com	Fire Aspen	Wholesale	93	0.375
2015-11-16 12:15:59	ebay.com	Sunspot	Wholesale	64	0.375
2014-12-09 19:48:00	coloradoboomerangs.com	Bower Aussie Round	Retail	3	0
2015-12-08 08:22:59	amazon.com	Quad	Wholesale	124	0.594
2014-12-13 16:30:00	ebay.com	Fun Fly	Wholesale	30	0.15
2015-08-23 03:07:03	amazon.com	Aspen	Retail	8	0.072
2015-11-20 11:00:57	amazon.com	Carlota Doublers	Retail	4	0.019
2015-08-26 11:04:59	amazon.com	Aspen	Retail	3	0.019
2015-12-12 14:21:59	amazon.com	Aspen	Wholesale	91	0.356
2014-12-13 12:40:01	gel-boomerang.com	Fun Fly	Retail	2	0
2014-12-12 16:35:02	amazon.com	Fun Fly	Wholesale	37	0.159
2015-07-28 15:16:59	coloradoboomerangs.com	Fun Fly	Retail	2	0
2015-08-25 16:46:59	amazon.com	Aspen	Retail	6	0.072
2015-12-20 12:34:59	amazon.com	Fun Fly	Wholesale	35	0.16
2015-08-29 14:06:00	amazon.com	Manu MTA	Retail	1	0.019
2015-02-28 11:45:01	coloradoboomerangs.com	Bower Aussie Round	Retail	3	0
2015-07-13 05:30:02	amazon.com	Sunshine	Wholesale	34	0.169
2015-08-14 09:49:58	coloradoboomerangs.com	Fire Aspen	Retail	3	0
2015-11-27 11:33:56	coloradoboomerangs.com	GelFast	Retail	1	0
2015-11-03 12:30:57	amazon.com	Fun Fly	Retail	5	0.071
2015-04-09 12:43:03	ebay.com	Sunset	Wholesale	68	0.375
2015-12-08 18:15:59	coloradoboomerangs.com	Fun Fly	Retail	4	0
2015-02-19 22:13:00	ebay.com	Fun Fly	Retail	2	0
2015-12-12 08:45:01	ebay.com	Carlota Doublers	Retail	1	0
2014-12-09 12:11:57	coloradoboomerangs.com	Aspen	Retail	1	0
2014-12-07 19:44:58	amazon.com	Carlota Doublers	Retail	3	0.018
2014-12-06 17:46:01	amazon.com	Fun Fly	Retail	1	0.019
2015-06-03 03:54:00	coloradoboomerangs.com	Crested Beaut	Retail	4	0

## Sheet: Retail Price
Product	Retail Price
Alpine	21.95
Aspen	21.95
Carlota	19.95
Crested Beaut	17.95
Majestic Beaut	26.95
Sunshine	20
Bellen	25
Eagle	21.95
Yanaki	23.95
Phoenix	23.95
Darnell Tri Fly	9.95
Fun Fly	5
Fire Aspen	22
Sunset	26
Sunspot	14
Carlota Doublers	75
GelFast	24
Frido Fast Catch	50
Manu MTA	120
Manu LD	250
Bower Aussie Round	43
Quad	39.95
