# Supplementary material
Source: ML conference proceedings conference paper supplement (https://openreview.net/forum?id=tfyr2zRVoK)
Supplement: supplementary_material [file 4_Dragging_gt1.xlsx]

## Sheet: Sheet1
Hanging Mass (m2) (kg)	Acceleration (m/s^2)	Force (N)
0	0	0
0.01	0.128947	0.0967105
0.02	0.254545	0.190909
0.03	0.376923	0.282692
0.04	0.496203	0.372152
0.05	0.6125	0.459375
0.06	0.725926	0.544444
0.07	0.836585	0.627439
0.08	0.944578	0.708434
0.09	1.05	0.7875
0.1	1.15294	0.864706
0.11	1.25349	0.940116
0.12	1.35172	1.01379
0.13	1.44773	1.0858
0.14	1.54157	1.15618
0.15	1.63333	1.225
0.16	1.72308	1.29231
0.17	1.81087	1.35815
0.18	1.89677	1.42258
0.19	1.98085	1.48564
0.2	2.06316	1.54737
0.21	2.14375	1.60781
0.22	2.22268	1.66701
0.23	2.3	1.725
0.24	2.37576	1.78182
0.25	2.45	1.8375
0.26	2.52277	1.89208
0.27	2.59412	1.94559
0.28	2.66408	1.99806
0.29	2.73269	2.04952
0.3	2.8	2.1
0.31	2.86604	2.14953
0.32	2.93084	2.19813
0.33	2.99444	2.24583
0.34	3.05688	2.29266
0.35	3.11818	2.33864
0.36	3.17838	2.38378
0.37	3.2375	2.42813
0.38	3.29558	2.47168
0.39	3.35263	2.51447
0.4	3.4087	2.55652
0.41	3.46379	2.59784
0.42	3.51795	2.63846
0.43	3.57119	2.67839
0.44	3.62353	2.71765
0.45	3.675	2.75625
0.46	3.72562	2.79421
0.47	3.77541	2.83156
0.48	3.82439	2.86829
0.49	3.87258	2.90444
0.5	3.92	2.94
0.51	3.96667	2.975
0.52	4.0126	3.00945
0.53	4.05781	3.04336
0.54	4.10233	3.07674
0.55	4.14615	3.10962
0.56	4.18931	3.14198
0.57	4.23182	3.17386
0.58	4.27368	3.20526
0.59	4.31493	3.23619
0.6	4.35556	3.26667
0.61	4.39559	3.29669
0.62	4.43504	3.32628
0.63	4.47391	3.35543
0.64	4.51223	3.38417
0.65	4.55	3.4125
0.66	4.58723	3.44043
0.67	4.62394	3.46796
0.68	4.66014	3.4951
0.69	4.69583	3.52188
0.7	4.73103	3.54828
0.71	4.76575	3.57432
0.72	4.8	3.6
0.73	4.83378	3.62534
0.74	4.86711	3.65034
0.75	4.9	3.675
0.76	4.93245	3.69934
0.77	4.96447	3.72336
0.78	4.99608	3.74706
0.79	5.02727	3.77045
0.8	5.05806	3.79355
0.81	5.08846	3.81635
0.82	5.11847	3.83885
0.83	5.1481	3.86108
0.84	5.17736	3.88302
0.85	5.20625	3.90469
0.86	5.23478	3.92609
0.87	5.26296	3.94722
0.88	5.2908	3.9681
0.89	5.31829	3.98872
0.9	5.34545	4.00909
0.91	5.37229	4.02922
0.92	5.3988	4.0491
0.93	5.425	4.06875
0.94	5.45089	4.08817
0.95	5.47647	4.10735
0.96	5.50175	4.12632
0.97	5.52674	4.14506
0.98	5.55145	4.16358
0.99	5.57586	4.1819
1	5.6	4.2
1.01	5.62386	4.2179
1.02	5.64746	4.23559
1.03	5.67079	4.25309
1.04	5.69385	4.27039
1.05	5.71667	4.2875
1.06	5.73923	4.30442
1.07	5.76154	4.32115
1.08	5.78361	4.3377
1.09	5.80543	4.35408
1.1	5.82703	4.37027
1.11	5.84839	4.38629
1.12	5.86952	4.40214
1.13	5.89043	4.41782
1.14	5.91111	4.43333
1.15	5.93158	4.44868
1.16	5.95183	4.46387
1.17	5.97188	4.47891
1.18	5.99171	4.49378
1.19	6.01134	4.50851
1.2	6.03077	4.52308
