# Supplementary material
Source: ML conference proceedings conference paper supplement (https://openreview.net/forum?id=tfyr2zRVoK)
Supplement: supplementary_material [file 4_PeriodRate_gt1.xlsx]

## Sheet: Sheet1
Annual Rate (%)	Period per year	High Period
11.25	2	FALSE
7.776	6	TRUE
15.496	6	TRUE
9.32	2	FALSE
18.584	6	TRUE
18.198	8	TRUE
17.812	5	TRUE
14.724	2	FALSE
16.268	7	TRUE
13.566	8	TRUE
14.338	5	TRUE
9.706	5	TRUE
13.566	2	FALSE
9.706	5	TRUE
13.566	7	TRUE
7.776	7	TRUE
15.11	5	TRUE
15.496	3	FALSE
14.724	1	FALSE
12.794	7	TRUE
9.32	5	TRUE
16.268	7	TRUE
10.478	2	FALSE
18.584	7	TRUE
		17
