# Supplementary material
Source: ML conference proceedings conference paper supplement (https://openreview.net/forum?id=tfyr2zRVoK)
Supplement: supplementary_material [file 4_PricingTable_gt1.xlsx]

## Sheet: Sheet1
Date	Number of Rolls	Price	Revenue	Elapsed Time
2015-09-16	540			15
2015-09-15	360			16
2015-09-16	12			15
2015-09-15	468			16
2015-09-17	48			14
2015-09-18	84			13
2015-09-17	540			14
2015-09-18	492			13
2015-09-18	204			13
2015-09-15	408			16
2015-09-17	780			14
2015-09-16	444			15
2015-09-15	432			16
2015-09-16	456			15
2015-09-16	768			15
2015-09-17	528			14
2015-09-15	624			16
2015-09-17	372			14
2015-09-18	588			13
2015-09-15	504			16
2015-09-16	504			15
2015-09-18	660			13
2015-09-16	468			15
2015-09-18	492			13
2015-09-18	204			13

## Sheet: Pricing Table
Units From	Units To	Price per Roll (100 feet)
0	143	198
144	288	187
289	577	168
578	999	152
