# Supplementary material
Source: ML conference proceedings conference paper supplement (https://openreview.net/forum?id=tfyr2zRVoK)
Supplement: supplementary_material [file 4_StockChange_gt1.xlsx]

## Sheet: Sheet1
Stock	Value of Stock on Jan 1	Value of Stock on Dec 31	Indicator
A	98	103.1	Y
B	98.3702	95.5202	N
C	100.098	99.3478	N
D	95.9022	110.752	Y
E	98.1234	109.223	Y
F	95.532	95.232	N
G	99.851	85.901	N
H	101.208	106.458	Y
I	98.7404	97.3904	N
J	95.9022	100.552	Y
K	95.532	107.082	Y
L	96.2724	101.222	Y
