# Supplementary material
Source: ML conference proceedings conference paper supplement (https://openreview.net/forum?id=tfyr2zRVoK)
Supplement: supplementary_material [file 4_VelocityDisplacement_gt1.xlsx]

## Sheet: Sheet2
Displacement m
2
4
6
8
10
12
14
16
18
20
22
24
26
28
30
32
34
36
38
40

## Sheet: Sheet1
Displacement m	Velocity m/s
2	21
4	35
6	46
8	57
10	78
12	83
14	95
16	110
18	115
20	124
22	130
24	145
26	170
28	180
30	190
32	192
34	210
36	222
38	225
40	240
