# Supplementary material
Source: ML conference proceedings conference paper supplement (https://openreview.net/forum?id=tfyr2zRVoK)
Supplement: supplementary_material [file 4_XYScatterPlot_gt1.xlsx]

## Sheet: Sheet1
Angle (Degrees)	Range (m)	Height (m)	Marked Angles
0	0.05	-0.02
2.5	0.087	0.001
5	0.224	-0.016
7.5	0.309	0.009
10	0.342	-0.005
12.5	0.423	0.043
15	0.45	0.053
17.5	0.524	0.065	+
20	0.593	0.078	+
22.5	0.707	0.073	+
25	0.816	0.089	+
27.5	0.869	0.087	+
30	0.866	0.145	+
32.5	0.906	0.124	+
35	0.89	0.184	+
37.5	0.966	0.165	+
40	0.985	0.187	+
42.5	0.996	0.208	+
45	1	0.23	+
47.5	1.046	0.252	+
50	1.035	0.273	+
52.5	0.966	0.315	+
55	0.94	0.316	+
57.5	0.956	0.376	+
60	0.816	0.375	+
62.5	0.819	0.413	+
65	0.766	0.411	+
67.5	0.707	0.427	+
70	0.693	0.422	+
72.5	0.624	0.455	+
75	0.5	0.487
77.5	0.373	0.477
80	0.392	0.465
82.5	0.309	0.491
85	0.124	0.516
87.5	0.137	0.519
90	0.05	0.5
