# Supplementary material
Source: ML conference proceedings conference paper supplement (https://openreview.net/forum?id=tfyr2zRVoK)
Supplement: supplementary_material [file 5_ExpenseReport_gt1.xlsx]

## Sheet: Sheet1
Date	Formatted Date	Vendor/Client	Expense Account	Subtotal	Tax	Total
2019-12-21	12-2019	Client A	Gas	313
2019-12-21	12-2019	Client A	Meals	134
2019-12-25	12-2019	Company A	Car Repairs	1205
2019-12-26	12-2019	Client B	Material Purchase	1629
2019-12-27	12-2019	Client B	Meals	1126
2019-12-28	12-2019	Client B	Car Repairs	1597
2019-12-29	12-2019	Client A	Reception	792
2019-12-30	12-2019	Company B	Flight tickets	1018
2019-12-31	12-2019	Company A	Gas	263
2020-01-01	01-2020	Client B	Meals	1697
2020-01-02	01-2020	Client B	Car Repairs	1954
2020-01-03	01-2020	Client B	Material Purchase	1681
2020-01-04	01-2020	Client B	Hiring	1019
2020-01-05	01-2020	Client A	Accommodation	157
2020-01-06	01-2020	Company B	Reception	828
2020-01-07	01-2020	Company A	Flight tickets	136
2020-01-08	01-2020	Client A	Gas	127
2020-01-09	01-2020	Company A	Meals	1529
2020-01-10	01-2020	Client B	Car Repairs	1755
2020-01-11	01-2020	Company B	Material Purchase	171
2020-01-12	01-2020	Company A	Hiring	1325
2020-01-13	01-2020	Client A	Accommodation	1841
2020-01-14	01-2020	Client A	Meals	1285
