# Supplementary material
Source: ML conference proceedings conference paper supplement (https://openreview.net/forum?id=tfyr2zRVoK)
Supplement: supplementary_material [file 5_IncomeStatement2_gt1.xlsx]

## Sheet: Sheet2
Year_Profit

## Sheet: Sheet1
Year	Sales	Sales Return	Discounts and Allowances	Net Sales	Materials Charges	Labor Charges	Overhead	Total Cost of Goods Sold	Gross Profit
2015	78000	3000	1000		8000	9000	2000
2016	73423	3884	1279		9613	9085	1900
2017	78842	4234	1017		10765	7395	1980
2018	86241	4413	1377		9736	7997	1899
2019	85548	4073	898		7962	7939	1812
2020	82394	4152	1827		9222	7536	1733
2021	82316	3492	911		9511	7159	1609
2022	73296	3659	1755		9740	5807	1483
2023	68844	4387	1830		9767	7578	1633
