# Supplementary material
Source: ML conference proceedings conference paper supplement (https://openreview.net/forum?id=tfyr2zRVoK)
Supplement: supplementary_material [file 5_IncomeStatement_gt1.xlsx]

## Sheet: Sheet1
Year	Net Sales	COGS	Gross Profit	Operating Expenses	Operating Profit	Tax Expense	Net Profit
2015	74000	29855		37322		1364.6
2016	93948	49396		44450		20.4
2017	86223	43511		40498		442.8
2018	106125	61981		43552		118.4
2019	107581	59573		45691		463.4
2020	106239	59987		42820		686.4
2021	114379	68154		46076		29.8
2022	125242	79287		38307		1529.6
