# Supplementary material
Source: ML conference proceedings conference paper supplement (https://openreview.net/forum?id=tfyr2zRVoK)
Supplement: supplementary_material [file 5_PeriodRate_gt1.xlsx]

## Sheet: Sheet1
Annual Rate (%)	Period per year
7.776	6
7.776	7
9.32	2
9.32	5
9.706	5
9.706	5
10.478	2
11.25	2
12.794	7
13.566	8
13.566	2
13.566	7
14.338	5
14.724	2
14.724	1
15.11	5
15.496	6
15.496	3
16.268	7
16.268	7
17.812	5
18.198	8
18.584	6
18.584	7
