# Supplementary material
Source: ML conference proceedings conference paper supplement (https://openreview.net/forum?id=tfyr2zRVoK)
Supplement: supplementary_material [file 5_PricingTable_gt1.xlsx]

## Sheet: Sheet1
Date	Number of Rolls	Price	Revenue
2015-09-16	540	168
2015-09-15	360	168
2015-09-16	12	198
2015-09-15	468	168
2015-09-17	48	198
2015-09-18	84	198
2015-09-17	540	168
2015-09-18	492	168
2015-09-18	204	187
2015-09-15	408	168
2015-09-17	780	152
2015-09-16	444	168
2015-09-15	432	168
2015-09-16	456	168
2015-09-16	768	152
2015-09-17	528	168
2015-09-15	624	152
2015-09-17	372	168
2015-09-18	588	152
2015-09-15	504	168
2015-09-16	504	168
2015-09-18	660	152
2015-09-16	468	168
2015-09-18	492	168
2015-09-18	204	187

## Sheet: Pricing Table
Units From	Units To	Price per Roll (100 feet)
0	143	198
144	288	187
289	577	168
578	999	152
