# Supplementary material
Source: ML conference proceedings conference paper supplement (https://openreview.net/forum?id=tfyr2zRVoK)
Supplement: supplementary_material [file 5_RampUpAndDown_gt1.xlsx]

## Sheet: Sheet1
Hanging mass (kilograms)	Acceleration of Block up Ramp	Hanging mass (kilograms)	Acceleration of Block down Ramp
0.4		0
0.42		0.02
0.44		0.04
0.46		0.06
0.48		0.08
0.5		0.1
0.52		0.12
0.54		0.14
0.56		0.16
0.58		0.18
0.6		0.2
0.62		0.22
0.64		0.24
0.66		0.26
0.68		0.28
0.7		0.3
0.72		0.32
0.74		0.34
0.76		0.36
0.78		0.38
0.8		0.4
0.82		0.42
0.84		0.44
0.86		0.46
0.88		0.48
0.9		0.5
0.92		0.52
0.94		0.54
0.96		0.56
