# Supplementary material
Source: ML conference proceedings conference paper supplement (https://openreview.net/forum?id=tfyr2zRVoK)
Supplement: supplementary_material [file 5_SmallBalanceSheet_gt1.xlsx]

## Sheet: Sheet1
Year	Current Assets	Fixed Assets	Other Assets	Assets	Growth Rate	Current Liabilities	Long-term Liabilities	Owner's Equity	Liabilities & Owner's Equity
2014	185682	45500	3580	234762		6762	50000	172474
2015	204527	43243	3520	251290	0.0704032	7653	50000	196318
2016	219289	40840	3726	263855	0.050002	8258	40000	220797
2017	248718	38419	4011	291148	0.103439	9133	40000	239576
2018	264792	35854	4030	304676	0.0464643	9839	30000	253852
2019	282148	33181	4088	319417	0.0483825	10585	30000	282688
