# Supplementary material
Source: ML conference proceedings conference paper supplement (https://openreview.net/forum?id=tfyr2zRVoK)
Supplement: supplementary_material [file 5_SummerSales_gt1.xlsx]

## Sheet: Sheet2
Row Labels	Sum of Revenue ($)
Aspen	479.13
Bellen	23.25
Carlota	298.05
Crested Beaut	75.62
Doublers	240.99
FlatTop	28.92
Majectic Beaut	28.28
Quad	707.82
Sunbell	200.15
Sunset	143.89
Sunshine	142.05
Grand Total	2368.15
Row Labels	Sum of Revenue ($)
E-mail Coupon	75.62
In Store Sales	649.16
Web Site Sales	1643.37
Grand Total	2368.15

## Sheet: Sheet1
Date	Month	Week	Promotion	Sales Channel	Product	Revenue ($)
2020-09-16	Sep	38	None	In Store Sales	Doublers	160.04
2020-07-01	Jul	27	None	In Store Sales	Sunshine	40.76
2020-06-02	Jun	23	None	E-mail Coupon	Crested Beaut	75.62
2020-05-15	May	20	None	Web Site Sales	Quad	99.29
2020-05-17	May	21	None	In Store Sales	Carlota	46.25
2020-06-10	Jun	24	None	In Store Sales	Majectic Beaut	28.28
2020-05-03	May	19	None	In Store Sales	Sunset	71.86
2020-05-13	May	20	None	Web Site Sales	Carlota	46.1
2020-09-02	Sep	36	None	Web Site Sales	Bellen	23.25
2020-07-03	Jul	27	None	Web Site Sales	Sunbell	50.9
2020-06-04	Jun	23	None	In Store Sales	Quad	66.85
2020-09-01	Sep	36	None	Web Site Sales	Sunset	24.68
2020-09-10	Sep	37	None	Web Site Sales	Carlota	89
2020-05-21	May	21	None	Web Site Sales	Quad	68.25
2020-07-26	Jul	31	None	In Store Sales	Sunshine	20.88
2020-05-12	May	20	None	Web Site Sales	Sunbell	24.75
2020-05-12	May	20	None	Web Site Sales	Doublers	80.95
2020-07-29	Jul	31	None	Web Site Sales	Quad	306.04
2020-05-18	May	21	None	Web Site Sales	Sunshine	20.01
2020-06-30	Jun	27	None	Web Site Sales	Carlota	69.85
2020-05-29	May	22	None	In Store Sales	Quad	99
2020-06-13	Jun	24	None	In Store Sales	Quad	68.39
2020-07-16	Jul	29	None	Web Site Sales	FlatTop	28.92
2020-07-29	Jul	31	None	In Store Sales	Carlota	46.85
2020-09-11	Sep	37	None	Web Site Sales	Aspen	479.13
2020-06-10	Jun	24	None	Web Site Sales	Sunset	47.35
2020-05-18	May	21	None	Web Site Sales	Sunbell	75.91
2020-06-28	Jun	27	None	Web Site Sales	Sunshine	60.4
2020-06-14	Jun	25	None	Web Site Sales	Sunbell	48.59
