# Supplementary material
Source: ML conference proceedings conference paper supplement (https://openreview.net/forum?id=tfyr2zRVoK)
Supplement: supplementary_material [file 5_WeeklySales_gt1.xlsx]

## Sheet: Sheet2
Row Labels	Sum of Sales	Sum of COGS
Week 1	92808	81230.8
Week 10	79359	50690.1
Week 2	103740	32966.5
Week 3	92828	10560.4
Week 4	56032	51268.7
Week 5	83685	33203.7
Week 6	89271	26838.7
Week 7	120530	79725.8
Week 8	81764	61115.6
Week 9	101728	3733.35
Grand Total	901745	431333

## Sheet: Sheet1
Week	Sales	COGS
Week 1	92808	81230.8
Week 2	103740	32966.5
Week 3	92828	10560.4
Week 4	56032	51268.7
Week 5	83685	33203.7
Week 6	89271	26838.7
Week 7	120530	79725.8
Week 8	81764	61115.6
Week 9	101728	3733.35
Week 10	79359	50690.1
