# Supplementary material
Source: ML conference proceedings conference paper supplement (https://openreview.net/forum?id=tfyr2zRVoK)
Supplement: supplementary_material [file 6_FutureValue_gt1.xlsx]

## Sheet: Sheet1
No.	Present Value	Years	Annual Interest Rate	# Compound Periods	Combined Info
1	3150	6	0.18	1	No.: 1, Present Value: 3150, Years: 6, Annual Interest Rate: 0.18, # Compound Periods: 1
2	8453	19	0.06	1	No.: 2, Present Value: 8453, Years: 19, Annual Interest Rate: 0.06, # Compound Periods: 1
3	89305	13	0.11	1	No.: 3, Present Value: 89305, Years: 13, Annual Interest Rate: 0.11, # Compound Periods: 1
4	227382	29	0.05	1	No.: 4, Present Value: 227382, Years: 29, Annual Interest Rate: 0.05, # Compound Periods: 1
