# Supplementary material
Source: ML conference proceedings conference paper supplement (https://openreview.net/forum?id=tfyr2zRVoK)
Supplement: supplementary_material [file 6_PricingTable_gt1.xlsx]

## Sheet: Sheet1
Date	Marked Dates	Number of Rolls	Price	Revenue
2015-09-16	-	540
2015-09-15	-	360
2015-09-16	-	12
2015-09-15	-	468
2015-09-17		48
2015-09-18	+	84
2015-09-17		540
2015-09-18	+	492
2015-09-18	+	204
2015-09-15	-	408
2015-09-17		780
2015-09-16	-	444
2015-09-15	-	432
2015-09-16	-	456
2015-09-16	-	768
2015-09-17		528
2015-09-15	-	624
2015-09-17		372
2015-09-18	+	588
2015-09-15	-	504
2015-09-16	-	504
2015-09-18	+	660
2015-09-16	-	468
2015-09-18	+	492
2015-09-18	+	204

## Sheet: Pricing Table
Units From	Units To	Price per Roll (100 feet)
0	143	198
144	288	187
289	577	168
578	999	152
