# Supplementary material
Source: ML conference proceedings conference paper supplement (https://openreview.net/forum?id=tfyr2zRVoK)
Supplement: supplementary_material [file 6_SalesRep_gt1.xlsx]

## Sheet: Sheet2
Sales Rep	Avg Sales
Ivelisse Peel
Sigrid Grooms
Majorie Flaherty
Stevie Fisk
Nova Bolduc
Naoma Moyer
Eric Minter
Dotty Dorn
Kandice Hussey
Cleo Nixon

## Sheet: Sheet1
Sales Rep	Jan	Feb	Mar	Apr	May	Jun
Ivelisse Peel	696	420	722	428	279	349
Sigrid Grooms	429	419	146	253	730	473
Majorie Flaherty	563	325	197	229	664	275
Stevie Fisk	710	287	209	485	459	498
Nova Bolduc	767	283	624	149	156	460
Naoma Moyer	220	282	390	714	563	783
Eric Minter	231	735	416	378	368	353
Dotty Dorn	229	496	519	309	616	405
Kandice Hussey	752	773	483	220	597	175
Cleo Nixon	255	567	237	692	245	472
