# Supplementary material
Source: ML conference proceedings conference paper supplement (https://openreview.net/forum?id=tfyr2zRVoK)
Supplement: supplementary_material [file 6_SmallBalanceSheet_gt1.xlsx]

## Sheet: Sheet1
Year	Current Assets	Fixed Assets	Other Assets	Assets	Current Liabilities	Long-term Liabilities	Owner's Equity	Liabilities & Owner's Equity
2014	185682	45500	3580		6762	50000	172474
2015	204527	43243	3520		7653	50000	196318
2016	219289	40840	3726		8258	40000	220797
2017	248718	38419	4011		9133	40000	239576
2018	264792	35854	4030		9839	30000	253852
2019	282148	33181	4088		10585	30000	282688
