# Supplementary material
Source: ML conference proceedings conference paper supplement (https://openreview.net/forum?id=tfyr2zRVoK)
Supplement: supplementary_material [file 6_XYScatterPlot_gt1.xlsx]

## Sheet: Sheet1
Angle (Degrees)	Range (cm)	Height (cm)
0	5	-2
2.5	8.7	0.1
5	22.4	-1.6
7.5	30.9	0.9
10	34.2	-0.5
12.5	42.3	4.3
15	45	5.3
17.5	52.4	6.5
20	59.3	7.8
22.5	70.7	7.3
25	81.6	8.9
27.5	86.9	8.7
30	86.6	14.5
32.5	90.6	12.4
35	89	18.4
37.5	96.6	16.5
40	98.5	18.7
42.5	99.6	20.8
45	100	23
47.5	104.6	25.2
50	103.5	27.3
52.5	96.6	31.5
55	94	31.6
57.5	95.6	37.6
60	81.6	37.5
62.5	81.9	41.3
65	76.6	41.1
67.5	70.7	42.7
70	69.3	42.2
72.5	62.4	45.5
75	50	48.7
77.5	37.3	47.7
80	39.2	46.5
82.5	30.9	49.1
85	12.4	51.6
87.5	13.7	51.9
90	5	50
