# Supplementary material
Source: ML conference proceedings conference paper supplement (https://openreview.net/forum?id=tfyr2zRVoK)
Supplement: supplementary_material [file 7_BoomerangSales_gt1.xlsx]

## Sheet: Sheet2
Row Labels	Sum of Quantity
amazon.com	388
coloradoboomerangs.com	63
ebay.com	234
gel-boomerang.com	95
Grand Total	780

## Sheet: Sheet1
Date Time	Web Site	Product	Type	Quantity	Discount
2015-09-08 10:13:00	amazon.com	Aspen		33	0.165
2015-12-11 23:26:00	ebay.com	Yanaki		29	0.15
2015-12-19 18:10:56	amazon.com	Bellen		3	0.019
2015-08-23 12:55:00	ebay.com	Quad		36	0.15
2015-07-09 05:02:58	coloradoboomerangs.com	Crested Beaut		38	0.15
2015-06-30 16:40:56	ebay.com	Manu LD		4	0
2015-07-01 13:16:01	coloradoboomerangs.com	Bellen		4	0
2015-08-02 04:06:57	gel-boomerang.com	Fire Aspen		93	0.375
2015-11-16 12:15:59	ebay.com	Sunspot		64	0.375
2014-12-09 19:48:00	coloradoboomerangs.com	Bower Aussie Round		3	0
2015-12-08 08:22:59	amazon.com	Quad		124	0.594
2014-12-13 16:30:00	ebay.com	Fun Fly		30	0.15
2015-08-23 03:07:03	amazon.com	Aspen		8	0.072
2015-11-20 11:00:57	amazon.com	Carlota Doublers		4	0.019
2015-08-26 11:04:59	amazon.com	Aspen		3	0.019
2015-12-12 14:21:59	amazon.com	Aspen		91	0.356
2014-12-13 12:40:01	gel-boomerang.com	Fun Fly		2	0
2014-12-12 16:35:02	amazon.com	Fun Fly		37	0.159
2015-07-28 15:16:59	coloradoboomerangs.com	Fun Fly		2	0
2015-08-25 16:46:59	amazon.com	Aspen		6	0.072
2015-12-20 12:34:59	amazon.com	Fun Fly		35	0.16
2015-08-29 14:06:00	amazon.com	Manu MTA		1	0.019
2015-02-28 11:45:01	coloradoboomerangs.com	Bower Aussie Round		3	0
2015-07-13 05:30:02	amazon.com	Sunshine		34	0.169
2015-08-14 09:49:58	coloradoboomerangs.com	Fire Aspen		3	0
2015-11-27 11:33:56	coloradoboomerangs.com	GelFast		1	0
2015-11-03 12:30:57	amazon.com	Fun Fly		5	0.071
2015-04-09 12:43:03	ebay.com	Sunset		68	0.375
2015-12-08 18:15:59	coloradoboomerangs.com	Fun Fly		4	0
2015-02-19 22:13:00	ebay.com	Fun Fly		2	0
2015-12-12 08:45:01	ebay.com	Carlota Doublers		1	0
2014-12-09 12:11:57	coloradoboomerangs.com	Aspen		1	0
2014-12-07 19:44:58	amazon.com	Carlota Doublers		3	0.018
2014-12-06 17:46:01	amazon.com	Fun Fly		1	0.019
2015-06-03 03:54:00	coloradoboomerangs.com	Crested Beaut		4	0

## Sheet: Retail Price
Product	Retail Price
Alpine	21.95
Aspen	21.95
Carlota	19.95
Crested Beaut	17.95
Majestic Beaut	26.95
Sunshine	20
Bellen	25
Eagle	21.95
Yanaki	23.95
Phoenix	23.95
Darnell Tri Fly	9.95
Fun Fly	5
Fire Aspen	22
Sunset	26
Sunspot	14
Carlota Doublers	75
GelFast	24
Frido Fast Catch	50
Manu MTA	120
Manu LD	250
Bower Aussie Round	43
Quad	39.95
