# Supplementary material
Source: ML conference proceedings conference paper supplement (https://openreview.net/forum?id=tfyr2zRVoK)
Supplement: supplementary_material [file 7_EasyGDPBreakdown_gt1.xlsx]

## Sheet: Sheet1
Country	IndicatorName	2000	2001	2002	2003	2004	2005	2006	2007	2008	2009	2010	2011	2012	2013
Afghanistan	Agriculture, hunting, forestry, fishing (ISIC A-B)	1.93765e+09	1.70731e+09	2.28372e+09	2.36138e+09	2.01984e+09	2.26679e+09	2.44058e+09	2.95699e+09	2.61069e+09	3.21952e+09	2.63942e+09	2.76324e+09	2.85306e+09	3.08372e+09
Albania	Agriculture, hunting, forestry, fishing (ISIC A-B)	1.31364e+09	1.34903e+09	1.37669e+09	1.41722e+09	1.50655e+09	1.517e+09	1.56442e+09	1.60712e+09	1.72074e+09	1.75351e+09	1.88765e+09	1.97775e+09	2.08473e+09	2.09989e+09
Algeria	Agriculture, hunting, forestry, fishing (ISIC A-B)	5.52742e+09	6.23493e+09	6.16011e+09	7.36133e+09	7.75884e+09	7.9373e+09	8.58022e+09	8.79472e+09	8.46052e+09	1.02457e+10	1.07477e+10	1.19945e+10	1.28581e+10	1.39896e+10
Andorra	Agriculture, hunting, forestry, fishing (ISIC A-B)	1.11543e+07	1.05635e+07	9.96113e+06	9.61451e+06	1.04041e+07	1.24484e+07	1.37815e+07	1.40414e+07	1.24504e+07	1.21484e+07	1.15059e+07	1.08967e+07	1.07397e+07	1.07282e+07
Angola	Agriculture, hunting, forestry, fishing (ISIC A-B)	1.52579e+09	1.65052e+09	1.78392e+09	1.82852e+09	2.02417e+09	2.34399e+09	2.57304e+09	3.25959e+09	3.31537e+09	4.23528e+09	4.48467e+09	4.90412e+09	5.15854e+09	5.28148e+09
Anguilla	Agriculture, hunting, forestry, fishing (ISIC A-B)	4.08943e+06	4.0025e+06	4.36268e+06	4.66251e+06	5.01736e+06	5.34774e+06	5.48335e+06	5.79147e+06	6.25073e+06	4.81606e+06	4.6435e+06	5.90564e+06	6.36861e+06	5.35252e+06
Antigua and Barbuda	Agriculture, hunting, forestry, fishing (ISIC A-B)	1.41167e+07	1.38151e+07	1.54772e+07	1.64039e+07	1.60803e+07	1.79667e+07	1.89889e+07	1.88124e+07	1.75217e+07	1.5058e+07	1.53117e+07	1.59369e+07	1.55728e+07	1.56133e+07
Argentina	Agriculture, hunting, forestry, fishing (ISIC A-B)	1.42792e+10	1.44294e+10	1.40997e+10	1.50686e+10	1.48384e+10	1.65783e+10	1.73495e+10	1.83614e+10	1.62944e+10	1.53523e+10	1.77233e+10	1.71968e+10	1.60867e+10	1.77757e+10
Armenia	Agriculture, hunting, forestry, fishing (ISIC A-B)	6.09855e+08	6.81208e+08	7.07094e+08	7.36792e+08	8.41416e+08	9.3579e+08	9.40748e+08	1.03819e+09	1.07208e+09	1.13607e+09	9.54032e+08	1.08775e+09	1.19084e+09	1.27669e+09
Aruba	Agriculture, hunting, forestry, fishing (ISIC A-B)	8.97133e+06	8.83214e+06	8.58032e+06	8.60064e+06	9.0224e+06	9.01117e+06	9.20048e+06	9.64914e+06	8.95359e+06	9.39018e+06	9.09947e+06	9.61754e+06	9.35167e+06	9.74579e+06
Australia	Agriculture, hunting, forestry, fishing (ISIC A-B)	1.91172e+10	1.96573e+10	1.55034e+10	1.95045e+10	2.03312e+10	2.08809e+10	1.77366e+10	1.89431e+10	2.22676e+10	2.20661e+10	2.28894e+10	2.31176e+10	2.2487e+10	2.28756e+10
Austria	Agriculture, hunting, forestry, fishing (ISIC A-B)	3.9497e+09	3.92934e+09	3.86803e+09	3.76806e+09	4.08282e+09	3.97851e+09	3.92793e+09	4.29544e+09	4.58951e+09	4.2767e+09	4.07469e+09	4.71678e+09	4.34277e+09	4.19157e+09
Azerbaijan	Agriculture, hunting, forestry, fishing (ISIC A-B)	8.59873e+08	9.55342e+08	1.01648e+09	1.07349e+09	1.12712e+09	1.21163e+09	1.22252e+09	1.27139e+09	1.34913e+09	1.39631e+09	1.36468e+09	1.44475e+09	1.52853e+09	1.60341e+09
Bahamas	Agriculture, hunting, forestry, fishing (ISIC A-B)	1.49221e+08	1.51665e+08	1.72212e+08	1.87979e+08	1.75153e+08	157767885	1.44862e+08	1.34238e+08	1.38193e+08	1.43344e+08	1.48612e+08	1.35957e+08	1.43621e+08	1.18989e+08
Bahrain	Agriculture, hunting, forestry, fishing (ISIC A-B)	4.52171e+07	4.69565e+07	4.59249e+07	4.76007e+07	5.17836e+07	5.15655e+07	5.2487e+07	5.1383e+07	5.14603e+07	5.71951e+07	5.26722e+07	5.35161e+07	5.46381e+07	5.55167e+07
Bangladesh	Agriculture, hunting, forestry, fishing (ISIC A-B)	1.06942e+10	1.10298e+10	1.10305e+10	1.13699e+10	1.18348e+10	1.20959e+10	1.26932e+10	1.40114e+10	1.44605e+10	1.50558e+10	1.58451e+10	1.65512e+10	1.70501e+10	1.74704e+10
Barbados	Agriculture, hunting, forestry, fishing (ISIC A-B)	7.36679e+07	6.66863e+07	6.39177e+07	6.03066e+07	5.60935e+07	60600000	5.71609e+07	5.84654e+07	5.84654e+07	6.01256e+07	5.64493e+07	5.28916e+07	5.11127e+07	5.34742e+07
Belarus	Agriculture, hunting, forestry, fishing (ISIC A-B)	2.01704e+09	2.04156e+09	2.07314e+09	2.21261e+09	2.5097e+09	2.57345e+09	2.72604e+09	2.85951e+09	3.104e+09	3.11273e+09	3.18684e+09	3.40437e+09	3.62204e+09	3.47209e+09
Belgium	Agriculture, hunting, forestry, fishing (ISIC A-B)	3.19602e+09	2.97033e+09	3.24648e+09	3.14508e+09	3.34358e+09	3.24168e+09	3.52731e+09	3.50195e+09	3.55081e+09	3.35071e+09	3.58293e+09	3.49026e+09	3.33311e+09	3.44289e+09
Belize	Agriculture, hunting, forestry, fishing (ISIC A-B)	9.44947e+07	9.41225e+07	9.46328e+07	1.31381e+08	1.43816e+08	148274275	1.38698e+08	1.10049e+08	1.20932e+08	1.23932e+08	1.32431e+08	1.26679e+08	1.35326e+08	1.42929e+08
Benin	Agriculture, hunting, forestry, fishing (ISIC A-B)	1.19783e+09	1.27424e+09	1.30565e+09	1.33493e+09	1.41886e+09	1.40715e+09	1.48527e+09	1.54808e+09	1.60328e+09	1.64395e+09	1.66703e+09	1.75568e+09	1.86861e+09	1.98715e+09
Bermuda	Agriculture, hunting, forestry, fishing (ISIC A-B)	3.15324e+07	3.09542e+07	3.31317e+07	3.48922e+07	3.85338e+07	39025088	4.24442e+07	4.41745e+07	4.6569e+07	4.42312e+07	4.38232e+07	4.20548e+07	3.90123e+07	3.94523e+07
Bhutan	Agriculture, hunting, forestry, fishing (ISIC A-B)	1.60093e+08	1.68586e+08	1.73354e+08	1.77183e+08	1.80985e+08	1.82912e+08	1.87536e+08	1.8906e+08	1.90399e+08	1.95461e+08	1.97128e+08	2.01885e+08	2.06431e+08	2.12496e+08
Bolivia	Agriculture, hunting, forestry, fishing (ISIC A-B)	9.47085e+08	9.79862e+08	9.84245e+08	1.07e+09	1.07265e+09	1.1261e+09	1.17407e+09	1.16813e+09	1.19868e+09	1.24281e+09	1.22817e+09	1.26621e+09	1.31875e+09	1.38053e+09
Bosnia and Herzegovina	Agriculture, hunting, forestry, fishing (ISIC A-B)	6.80095e+08	7.27297e+08	8.12454e+08	7.586e+08	8.78004e+08	9.27273e+08	9.80785e+08	1.00249e+09	1.04513e+09	1.02445e+09	9.83841e+08	9.82987e+08	8.71113e+08	1.01166e+09
Botswana	Agriculture, hunting, forestry, fishing (ISIC A-B)	1.80656e+08	1.94065e+08	1.54311e+08	1.85366e+08	1.86242e+08	1.81581e+08	2.05781e+08	2.30974e+08	2.35506e+08	2.50515e+08	2.92375e+08	2.25454e+08	2.39861e+08	2.53282e+08
Brazil	Agriculture, hunting, forestry, fishing (ISIC A-B)	3.51975e+10	3.73313e+10	3.97861e+10	4.20963e+10	4.30714e+10	4.31989e+10	4.52734e+10	4.74655e+10	5.0463e+10	4.88917e+10	5.19867e+10	5.40155e+10	5.27509e+10	5.51006e+10
British Virgin Islands	Agriculture, hunting, forestry, fishing (ISIC A-B)	1.04512e+07	1.01412e+07	1.01019e+07	9.74672e+06	9.66042e+06	9479000	8.87304e+06	8.34234e+06	8.44755e+06	9.93044e+06	9.35297e+06	8.9846e+06	9.10447e+06	9.01051e+06
Brunei Darussalam	Agriculture, hunting, forestry, fishing (ISIC A-B)	6.42334e+07	6.7988e+07	7.151e+07	7.96368e+07	8.9152e+07	9.02429e+07	8.13755e+07	7.77258e+07	8.06065e+07	8.53944e+07	8.03034e+07	8.42428e+07	9.38792e+07	8.78186e+07
Bulgaria	Agriculture, hunting, forestry, fishing (ISIC A-B)	2.19857e+09	2.20932e+09	2.3243e+09	2.27745e+09	2.36025e+09	2.16001e+09	2.14587e+09	1.56871e+09	2.06989e+09	1.88208e+09	1.76168e+09	1.73494e+09	1.60829e+09	1.66059e+09
Burkina Faso	Agriculture, hunting, forestry, fishing (ISIC A-B)	1.28304e+09	1.37289e+09	1.623e+09	1.85545e+09	1.75701e+09	1.92798e+09	2.29361e+09	2.1465e+09	2.49984e+09	2.74285e+09	3.06571e+09	3.01709e+09	3.40347e+09	3.62553e+09
Burundi	Agriculture, hunting, forestry, fishing (ISIC A-B)	4.67583e+08	4.51484e+08	4.70602e+08	4.29189e+08	4.14167e+08	4.56412e+08	4.70873e+08	4.45234e+08	4.74797e+08	6.52232e+08	7.58428e+08	7.64495e+08	8.04249e+08	8.35614e+08
Cabo Verde	Agriculture, hunting, forestry, fishing (ISIC A-B)	1.30646e+08	1.3031e+08	1.23184e+08	1.253e+08	1.25018e+08	1.17946e+08	1.18255e+08	1.1826e+08	1.19389e+08	1.31943e+08	1.26914e+08	1.33529e+08	1.41719e+08	1.37544e+08
Cambodia	Agriculture, hunting, forestry, fishing (ISIC A-B)	1.50963e+09	1.56334e+09	1.52445e+09	1.68465e+09	1.67006e+09	1.9326e+09	2.03849e+09	2.141e+09	2.26335e+09	2.38598e+09	2.48039e+09	2.5568e+09	2.66688e+09	2.71197e+09
Cameroon	Agriculture, hunting, forestry, fishing (ISIC A-B)	2.64731e+09	2.74595e+09	2.8467e+09	2.94642e+09	3.07506e+09	3.15774e+09	3.25299e+09	3.44539e+09	3.6254e+09	3.72935e+09	3.95286e+09	4.07673e+09	4.18487e+09	4.33784e+09
Canada	Agriculture, hunting, forestry, fishing (ISIC A-B)	1.86966e+10	1.69541e+10	1.60494e+10	1.77747e+10	1.93974e+10	2.00037e+10	1.97095e+10	1.9221e+10	2.11455e+10	1.96205e+10	1.99328e+10	2.0594e+10	2.07335e+10	2.11961e+10
Cayman Islands	Agriculture, hunting, forestry, fishing (ISIC A-B)	7.15526e+06	7.19346e+06	7.347e+06	7.43893e+06	7.52585e+06	8.14908e+06	8.17554e+06	8.71788e+06	9.19584e+06	1.01356e+07	9.98697e+06	1.0292e+07	1.06066e+07	1.05626e+07
Central African Republic	Agriculture, hunting, forestry, fishing (ISIC A-B)	5.79646e+08	6.10542e+08	6.07441e+08	5.9276e+08	6.0497e+08	6.06947e+08	6.21867e+08	6.38073e+08	6.45143e+08	6.42347e+08	6.60133e+08	6.98971e+08	7.13903e+08	4.53603e+08
Chad	Agriculture, hunting, forestry, fishing (ISIC A-B)	1.00207e+09	1.10354e+09	1.09716e+09	1.15411e+09	1.08987e+09	1.22203e+09	1.29815e+09	1.2819e+09	1.36298e+09	1.26485e+09	1.68604e+09	1.32186e+09	1.83738e+09	1.75103e+09
Chile	Agriculture, hunting, forestry, fishing (ISIC A-B)	3.10775e+09	3.34184e+09	3.57014e+09	3.66343e+09	4.15164e+09	4.63741e+09	5.09267e+09	5.20934e+09	5.60739e+09	5.29171e+09	5.30646e+09	5.94622e+09	5.89462e+09	6.00026e+09
China	Agriculture, hunting, forestry, fishing (ISIC A-B)	2.25587e+11	2.31904e+11	2.38628e+11	2.44594e+11	2.60004e+11	2.73604e+11	2.87284e+11	2.98041e+11	3.1407e+11	3.2721e+11	3.41185e+11	3.55687e+11	3.71866e+11	3.86741e+11
China: Hong Kong SAR	Agriculture, hunting, forestry, fishing (ISIC A-B)	1.11714e+08	1.16231e+08	1.14914e+08	1.07667e+08	1.10678e+08	1.09549e+08	1.04185e+08	9.75966e+07	7.93384e+07	7.67973e+07	8.07501e+07	8.10325e+07	7.69465e+07	7.7923e+07
Colombia	Agriculture, hunting, forestry, fishing (ISIC A-B)	9.7508e+09	9.92273e+09	1.03743e+10	1.06949e+10	1.10133e+10	1.13231e+10	1.15915e+10	1.20448e+10	1.19996e+10	1.19211e+10	1.1944e+10	1.21917e+10	1.24934e+10	1.31431e+10
Comoros	Agriculture, hunting, forestry, fishing (ISIC A-B)	1.63878e+08	1.74253e+08	1.82166e+08	1.88147e+08	1.89138e+08	1.97446e+08	1.99899e+08	2.00881e+08	2.17554e+08	2.1081e+08	2.09334e+08	2.17917e+08	2.26851e+08	2.36152e+08
Congo	Agriculture, hunting, forestry, fishing (ISIC A-B)	2.03007e+08	2.19294e+08	2.38104e+08	2.53014e+08	2.65171e+08	2.76721e+08	2.91747e+08	3.06231e+08	3.22649e+08	3.12884e+08	3.32314e+08	3.5604e+08	3.81922e+08	4.12082e+08
Cook Islands	Agriculture, hunting, forestry, fishing (ISIC A-B)	1.76774e+07	1.44879e+07	1.41065e+07	1.6947e+07	1.36022e+07	1.31298e+07	1.2233e+07	1.28683e+07	1.15937e+07	1.24295e+07	1.26661e+07	1.18134e+07	1.21956e+07	1.30315e+07
Costa Rica	Agriculture, hunting, forestry, fishing (ISIC A-B)	1.46675e+09	1.48719e+09	1.43865e+09	1.54483e+09	1.55604e+09	1.62278e+09	1.82872e+09	1.93125e+09	1.86874e+09	1.81728e+09	1.93838e+09	1.95013e+09	2.06032e+09	2.05854e+09
Côte d'Ivoire	Agriculture, hunting, forestry, fishing (ISIC A-B)	3.98118e+09	3.94476e+09	3.77222e+09	3.78329e+09	3.82829e+09	3.86004e+09	3.88996e+09	3.94441e+09	4.00435e+09	4.1671e+09	4.24722e+09	4.29733e+09	4.30516e+09	4.44016e+09
Croatia	Agriculture, hunting, forestry, fishing (ISIC A-B)	1.78398e+09	1.82746e+09	1.909e+09	1.77957e+09	1.9531e+09	1.92303e+09	2.08416e+09	2.00905e+09	2.11814e+09	2.06099e+09	1.92421e+09	1.85072e+09	1.57948e+09	1.5546e+09
Cuba	Agriculture, hunting, forestry, fishing (ISIC A-B)	2.22212e+09	2.19448e+09	2.3472e+09	2.37319e+09	2.25911e+09	1.9627e+09	1.85699e+09	2.21243e+09	2.22355e+09	2.30316e+09	2.3535e+09	2.40604e+09	2.48944e+09	2.5536e+09
Curaçao	Agriculture, hunting, forestry, fishing (ISIC A-B)	1.17548e+07	1.83314e+07	1.36222e+07	1.30732e+07	1.23174e+07	1.37989e+07	1.37377e+07	1.44253e+07	1.70028e+07	1.29258e+07	1.26013e+07	1.48957e+07	1.42348e+07	1.44896e+07
Cyprus	Agriculture, hunting, forestry, fishing (ISIC A-B)	4.73773e+08	4.71415e+08	4.99804e+08	4.44615e+08	4.50807e+08	4.47402e+08	3.98973e+08	3.84002e+08	3.59271e+08	3.58375e+08	3.73144e+08	3.97043e+08	3.94962e+08	3.91103e+08
Czech Republic	Agriculture, hunting, forestry, fishing (ISIC A-B)	2.46073e+09	2.40462e+09	2.38869e+09	2.45983e+09	2.73136e+09	3.01326e+09	2.75445e+09	2.04869e+09	2.23228e+09	2.6956e+09	2.25709e+09	2.2978e+09	2.35657e+09	2.1452e+09
Czechoslovakia (Former)	Agriculture, hunting, forestry, fishing (ISIC A-B)
D.P.R. of Korea	Agriculture, hunting, forestry, fishing (ISIC A-B)	2.6119e+09	2.8033e+09	2.92226e+09	2.97252e+09	3.09527e+09	3.25927e+09	3.17345e+09	2.88432e+09	3.11645e+09	3.08505e+09	3.01919e+09	3.17946e+09	3.30442e+09	3.22734e+09
D.R. of the Congo	Agriculture, hunting, forestry, fishing (ISIC A-B)	2.64672e+09	2.60684e+09	2.51209e+09	2.52876e+09	2.56949e+09	2.58194e+09	2.72732e+09	2.80286e+09	2.88052e+09	2.9607e+09	3.06768e+09	3.1772e+09	3.28692e+09	3.42647e+09
Denmark	Agriculture, hunting, forestry, fishing (ISIC A-B)	3.16621e+09	3.30342e+09	3.14445e+09	3.1487e+09	3.22915e+09	3.02989e+09	3.1624e+09	3.36532e+09	2.54359e+09	2.45727e+09	3.20077e+09	3.10915e+09	3.16842e+09	2.91695e+09
Djibouti	Agriculture, hunting, forestry, fishing (ISIC A-B)	1.89417e+07	1.95099e+07	2.00952e+07	2.06981e+07	2.16295e+07	2.26028e+07	2.4072e+07	2.55164e+07	2.73025e+07	2.92137e+07	3.12586e+07	3.18364e+07	3.3677e+07	3.54462e+07
Dominica	Agriculture, hunting, forestry, fishing (ISIC A-B)	4.81324e+07	4.53297e+07	4.4249e+07	4.19594e+07	4.19991e+07	4.18467e+07	4.23753e+07	3.90249e+07	4.42888e+07	4.49423e+07	4.12175e+07	4.43728e+07	4.73374e+07	4.82772e+07
Dominican Republic	Agriculture, hunting, forestry, fishing (ISIC A-B)	1.94651e+09	2.13172e+09	2.1851e+09	2.22498e+09	2.16979e+09	2.2973e+09	2.49415e+09	2.52494e+09	2.44019e+09	2.74401e+09	2.89399e+09	3.05174e+09	3.17629e+09	3.31377e+09
Ecuador	Agriculture, hunting, forestry, fishing (ISIC A-B)	3.15275e+09	3.30929e+09	3.36775e+09	3.59027e+09	3.6759e+09	3935357000	4.10492e+09	4.24529e+09	4.31606e+09	4.39009e+09	4.42255e+09	4.65972e+09	4.71465e+09	5.07128e+09
Egypt	Agriculture, hunting, forestry, fishing (ISIC A-B)	1.09313e+10	1.13369e+10	1.17451e+10	1.23164e+10	1.2555e+10	1.28959e+10	1.33149e+10	1.38049e+10	1.4267e+10	1.47194e+10	1.52308e+10	1.56454e+10	1.61021e+10	1.65887e+10
El Salvador	Agriculture, hunting, forestry, fishing (ISIC A-B)	1.57424e+09	1.53256e+09	1.53865e+09	1.55249e+09	1.59604e+09	1676970137	1.77217e+09	1.92195e+09	1.98027e+09	1.92297e+09	1.98298e+09	1.93424e+09	2.00114e+09	1.99221e+09
Equatorial Guinea	Agriculture, hunting, forestry, fishing (ISIC A-B)	1.36357e+08	1.33824e+08	1.20782e+08	1.3274e+08	1.30748e+08	1.40816e+08	1.47434e+08	1.58787e+08	1.55294e+08	1.55604e+08	1.56382e+08	1.57477e+08	1.44879e+08	1.50472e+08
Eritrea	Agriculture, hunting, forestry, fishing (ISIC A-B)	1.35985e+08	1.73285e+08	1.13017e+08	1.24869e+08	1.13963e+08	2.48244e+08	2.67594e+08	2.67726e+08	1.66985e+08	1.46037e+08	1.94303e+08	1.88668e+08	2.00493e+08	2.11853e+08
Estonia	Agriculture, hunting, forestry, fishing (ISIC A-B)	4.80931e+08	4.36537e+08	4.39683e+08	4.74937e+08	4.38039e+08	4.34163e+08	4.28175e+08	4.94317e+08	4.98614e+08	4.97535e+08	5.48059e+08	6.37713e+08	7.43348e+08	7.14235e+08
Ethiopia	Agriculture, hunting, forestry, fishing (ISIC A-B)	3.98031e+09	4.37324e+09	4.29277e+09	3.84226e+09	4.49193e+09	5.10013e+09	5.65594e+09	6.1903e+09	6.65539e+09	7.07944e+09	7.61927e+09	8.3018e+09	8.71042e+09	9.3282e+09
Ethiopia (Former)	Agriculture, hunting, forestry, fishing (ISIC A-B)
Fiji	Agriculture, hunting, forestry, fishing (ISIC A-B)	3.60307e+08	3.39913e+08	3.56323e+08	3.41476e+08	3.57104e+08	3.60149e+08	3.7789e+08	3.59558e+08	3.77299e+08	3.46538e+08	3.37121e+08	3.64743e+08	3.77716e+08	3.87415e+08
Finland	Agriculture, hunting, forestry, fishing (ISIC A-B)	4.75538e+09	4.66473e+09	4.66112e+09	4.50405e+09	4.46538e+09	4.66597e+09	4.76148e+09	5.0189e+09	5.00075e+09	5.37047e+09	5.39957e+09	5.63523e+09	5.28839e+09	5.29685e+09
France	Agriculture, hunting, forestry, fishing (ISIC A-B)	3.73586e+10	3.62456e+10	3.8293e+10	3.2471e+10	3.93863e+10	3.70843e+10	3.71431e+10	3.68415e+10	3.84579e+10	4.08846e+10	3.95093e+10	4.10482e+10	3.76688e+10	3.71505e+10
French Polynesia	Agriculture, hunting, forestry, fishing (ISIC A-B)	2.33152e+08	2.01337e+08	2.03637e+08	1.73915e+08	1.78075e+08	1.74484e+08	1.64188e+08	1.70441e+08	1.67711e+08	1.38447e+08	1.38104e+08	1.39215e+08	1.39344e+08	1.39167e+08
Gabon	Agriculture, hunting, forestry, fishing (ISIC A-B)	4.6816e+08	4.8213e+08	4.81806e+08	4.67946e+08	4.67085e+08	4.77477e+08	5.29782e+08	5.50812e+08	5.83504e+08	5.43876e+08	5.39932e+08	4.81983e+08	5.1188e+08	5.46013e+08
Gambia	Agriculture, hunting, forestry, fishing (ISIC A-B)	1.524e+08	1.65557e+08	1.35619e+08	1.62013e+08	1.72849e+08	1.68938e+08	1.44319e+08	1.41706e+08	1.78572e+08	1.9952e+08	2.21842e+08	1.68126e+08	1.78289e+08	1.95576e+08
Georgia	Agriculture, hunting, forestry, fishing (ISIC A-B)	7.79494e+08	8.43529e+08	8.31353e+08	9.17346e+08	8.45217e+08	9.46874e+08	8.36053e+08	8.63356e+08	8.25125e+08	7.69093e+08	7.31945e+08	7.90503e+08	7.60985e+08	8.35573e+08
Germany	Agriculture, hunting, forestry, fishing (ISIC A-B)	2.1572e+10	2.08384e+10	2.05674e+10	2.10444e+10	2.78414e+10	2.01786e+10	1.90414e+10	2.38103e+10	2.8514e+10	2.76249e+10	2.10171e+10	1.81e+10	2.06829e+10	2.02857e+10
Ghana	Agriculture, hunting, forestry, fishing (ISIC A-B)	4.08161e+09	4.24561e+09	4.43051e+09	4.69929e+09	5.0269e+09	5.23496e+09	5.47192e+09	5.37793e+09	5.77612e+09	6.19338e+09	6.52079e+09	6.57535e+09	6.72682e+09	7.07695e+09
Greece	Agriculture, hunting, forestry, fishing (ISIC A-B)	1.16836e+10	1.15405e+10	1.11043e+10	1.01282e+10	1.08015e+10	1.06887e+10	9.24016e+09	7.99769e+09	7.92904e+09	8.5139e+09	8.92578e+09	8.36417e+09	8.27364e+09	7.63928e+09
Greenland	Agriculture, hunting, forestry, fishing (ISIC A-B)	1.52908e+08	1.55603e+08	1.5341e+08	1.51951e+08	1.62379e+08	1.63084e+08	1.60973e+08	1.48154e+08	1.41536e+08	1.28518e+08	1.34969e+08	1.44536e+08	1.62803e+08	1.52945e+08
Grenada	Agriculture, hunting, forestry, fishing (ISIC A-B)	3.75629e+07	3.65802e+07	3.77059e+07	3.9917e+07	3.66663e+07	2.06185e+07	2.69144e+07	2.73545e+07	2.99982e+07	3.36357e+07	3.14393e+07	3.09406e+07	3.23523e+07	3.40097e+07
Guatemala	Agriculture, hunting, forestry, fishing (ISIC A-B)	2.9018e+09	2.93539e+09	3.09257e+09	3.1702e+09	3.30179e+09	3.37202e+09	3.41423e+09	3.61495e+09	3.64696e+09	3.7857e+09	3.77624e+09	3.96597e+09	4.16187e+09	4.35885e+09
Guinea	Agriculture, hunting, forestry, fishing (ISIC A-B)	5.48095e+08	5.80433e+08	6.04811e+08	6.2598e+08	6.46011e+08	6.54409e+08	6.64539e+08	6.37012e+08	5.56782e+08	5.87003e+08	6.01091e+08	6.28141e+08	6.5201e+08	6.93087e+08
Guinea-Bissau	Agriculture, hunting, forestry, fishing (ISIC A-B)	2.36853e+08	2.40443e+08	2.2361e+08	2.26969e+08	2.23335e+08	2.58962e+08	2.56012e+08	2.62338e+08	2.69855e+08	2.78157e+08	2.78769e+08	2.92708e+08	2.95928e+08	2.92672e+08
Guyana	Agriculture, hunting, forestry, fishing (ISIC A-B)	2.76943e+08	2.86424e+08	3.55448e+08	3.49393e+08	3.60435e+08	3.10968e+08	3.31413e+08	3.33275e+08	3.23501e+08	3.27619e+08	3.35296e+08	3.4419e+08	3.50191e+08	3.65054e+08
Haiti	Agriculture, hunting, forestry, fishing (ISIC A-B)	8.85818e+08	8.93838e+08	8.60464e+08	8.62534e+08	8.21141e+08	8.42355e+08	8.54255e+08	8.73917e+08	8.08464e+08	8.53738e+08	8.5322e+08	8.43907e+08	8.33041e+08	8.70813e+08
Honduras	Agriculture, hunting, forestry, fishing (ISIC A-B)	1.06337e+09	1.08593e+09	1.13482e+09	1.16148e+09	1.24536e+09	1.21679e+09	1.309e+09	1.38154e+09	1.40816e+09	1.38073e+09	1.40522e+09	1.49634e+09	1.64489e+09	1.71459e+09
Hungary	Agriculture, hunting, forestry, fishing (ISIC A-B)	2.98461e+09	3.39661e+09	2.84905e+09	2.94374e+09	4.42017e+09	4.16383e+09	3.89282e+09	3.05043e+09	4.74098e+09	4.19612e+09	3.25024e+09	3.70534e+09	2.86915e+09	3.30194e+09
Iceland	Agriculture, hunting, forestry, fishing (ISIC A-B)	7.88494e+08	7.99945e+08	8.19575e+08	7.93401e+08	8.23665e+08	8.1794e+08	7.94219e+08	7.83586e+08	7.82768e+08	8.08124e+08	7.40235e+08	7.68863e+08	7.98309e+08	8.39206e+08
India	Agriculture, hunting, forestry, fishing (ISIC A-B)	1.27915e+11	1.36264e+11	1.2627e+11	1.38621e+11	1.38873e+11	1.46064e+11	1.52147e+11	1.60978e+11	1.60992e+11	1.6245e+11	1.75506e+11	1.83333e+11	1.8593e+11	1.94694e+11
Indonesia	Agriculture, hunting, forestry, fishing (ISIC A-B)	3.20487e+10	3.30923e+10	3.42335e+10	3.55304e+10	3.6532e+10	3.75249e+10	3.87844e+10	4.01303e+10	4.20682e+10	4.3734e+10	4.50475e+10	4.65639e+10	4.85212e+10	5.02373e+10
Iran (Islamic Republic of)	Agriculture, hunting, forestry, fishing (ISIC A-B)	1.47137e+10	1.44691e+10	1.63443e+10	1.72503e+10	1.72566e+10	1.87885e+10	1.95985e+10	2.09531e+10	1.84806e+10	2.09755e+10	2.28213e+10	2.39843e+10	2.18402e+10	2.16148e+10
Iraq	Agriculture, hunting, forestry, fishing (ISIC A-B)	2.65803e+09	2.68989e+09	3.14666e+09	2.23005e+09	2.61911e+09	3.44032e+09	3.58878e+09	2.5949e+09	2.25258e+09	2.32886e+09	2.35377e+09	2.74532e+09	2.86215e+09	2.94336e+09
Ireland	Agriculture, hunting, forestry, fishing (ISIC A-B)	2.51186e+09	2.54917e+09	2.75347e+09	2.64898e+09	3.2119e+09	2.47264e+09	1.26702e+09	1.29257e+09	1.27919e+09	1.0447e+09	9.95265e+08	9.68045e+08	9.71788e+08	1.10329e+09
Israel	Agriculture, hunting, forestry, fishing (ISIC A-B)	1.7138e+09	1.86874e+09	1.92169e+09	1.78552e+09	2.09535e+09	2.26058e+09	2.24395e+09	2.20089e+09	2.2e+09	2.55244e+09	2.30336e+09	2.40268e+09	2.57929e+09	2.60115e+09
Italy	Agriculture, hunting, forestry, fishing (ISIC A-B)	3.95017e+10	3.82585e+10	3.66245e+10	3.52143e+10	3.94319e+10	3.75902e+10	3.73692e+10	3.74296e+10	3.78638e+10	3.72482e+10	3.73836e+10	3.80979e+10	3.70718e+10	3.72942e+10
Jamaica	Agriculture, hunting, forestry, fishing (ISIC A-B)	6.74735e+08	7.19762e+08	6.69889e+08	7.20591e+08	6.32342e+08	5.83134e+08	6.99622e+08	6.42909e+08	6.03255e+08	6.87593e+08	6.87749e+08	7.58713e+08	7.76364e+08	7.70983e+08
Japan	Agriculture, hunting, forestry, fishing (ISIC A-B)	6.84987e+10	6.30159e+10	6.69408e+10	6.08575e+10	5.48467e+10	5.54146e+10	5.44819e+10	5.79387e+10	6.20887e+10	5.62439e+10	5.5704e+10	5.68146e+10	5.70033e+10	5.78357e+10
Jordan	Agriculture, hunting, forestry, fishing (ISIC A-B)	2.19207e+08	2.23079e+08	2.78696e+08	3.11454e+08	3.46308e+08	3.47252e+08	3.92642e+08	3.97472e+08	4.31738e+08	4.87133e+08	5.20808e+08	5.41328e+08	4.90706e+08	4.73409e+08
Kazakhstan	Agriculture, hunting, forestry, fishing (ISIC A-B)	2.75313e+09	3.22449e+09	3.32654e+09	3.39975e+09	3.39592e+09	3.63851e+09	3.85713e+09	4.19986e+09	3.93982e+09	4.45905e+09	3.9418e+09	4.82924e+09	3.98745e+09	4.40882e+09
Kenya	Agriculture, hunting, forestry, fishing (ISIC A-B)	3.80999e+09	4.17689e+09	4.03258e+09	4.12881e+09	4.20099e+09	4.49185e+09	4.69218e+09	4.93101e+09	4.68528e+09	4.57762e+09	5.03764e+09	5.15672e+09	5.30864e+09	5.57748e+09
Kiribati	Agriculture, hunting, forestry, fishing (ISIC A-B)	2.72275e+07	2.58726e+07	2.40595e+07	2.50249e+07	2.55213e+07	2.27544e+07	2.51136e+07	2.51397e+07	2.60057e+07	2.59208e+07	2.49128e+07	2.73274e+07	2.82606e+07	2.82317e+07
Kosovo	Agriculture, hunting, forestry, fishing (ISIC A-B)	2.2544e+08	2.82246e+08	2.83577e+08	2.6789e+08	2.59443e+08	4.87315e+08	4.90259e+08	4.41423e+08	3.69952e+08	3.36979e+08	3.04704e+08	2.94203e+08	2.42893e+08	3.00424e+08
Kuwait	Agriculture, hunting, forestry, fishing (ISIC A-B)	1.66153e+08	2.02626e+08	2.35046e+08	2.51256e+08	2.51256e+08	2.43151e+08	1.78716e+08	1.94115e+08	1.64532e+08	2.11541e+08	5.07913e+08	7.87266e+08	7.93615e+08	7.47566e+08
Kyrgyzstan	Agriculture, hunting, forestry, fishing (ISIC A-B)	6.15174e+08	6.59938e+08	6.8044e+08	7.02182e+08	7.31031e+08	7.006e+08	7.12487e+08	7.23976e+08	7.30221e+08	7.79326e+08	7.59285e+08	7.73305e+08	7.8295e+08	8.05276e+08
Lao People's DR	Agriculture, hunting, forestry, fishing (ISIC A-B)	8.27233e+08	8.58457e+08	8.74786e+08	8.9675e+08	9.27443e+08	9.3414e+08	9.57124e+08	1.03969e+09	1.07838e+09	1.1089e+09	1.14423e+09	1.17464e+09	1.21307e+09	1.2555e+09
Latvia	Agriculture, hunting, forestry, fishing (ISIC A-B)	5.29784e+08	5.67922e+08	6.11144e+08	5.83836e+08	6.02387e+08	6.47775e+08	6.23857e+08	6.66797e+08	6.24328e+08	7.03522e+08	6.58228e+08	6.46551e+08	6.83465e+08	6.92222e+08
Lebanon	Agriculture, hunting, forestry, fishing (ISIC A-B)	7.79819e+08	7.96195e+08	7.73105e+08	7.94752e+08	7.98726e+08	7.65506e+08	7.57562e+08	7.74533e+08	7.32286e+08	7.71283e+08	8.04503e+08	8.60833e+08	8.31585e+08	8.33029e+08
Lesotho	Agriculture, hunting, forestry, fishing (ISIC A-B)	1.3682e+08	1.5452e+08	1.09116e+08	1.12851e+08	1.11827e+08	1.13378e+08	1.01688e+08	1.00752e+08	1.17069e+08	1.11142e+08	1.30071e+08	1.26098e+08	1.27152e+08	1.43068e+08
Liberia	Agriculture, hunting, forestry, fishing (ISIC A-B)	362785303	497372965	665122211	447385874	397277807	404000000	420160000	483715000	556764000	624195000	707421000	746808000	815029442	879863542
Libya	Agriculture, hunting, forestry, fishing (ISIC A-B)	8.76022e+08	9.14313e+08	9.48169e+08	9.8178e+08	1.02777e+09	1.10633e+09	1.21512e+09	1.26345e+09	1.29407e+09	1.32574e+09	1.31469e+09	4.07296e+08	9.89827e+08	7.99853e+08
Liechtenstein	Agriculture, hunting, forestry, fishing (ISIC A-B)	3.17272e+07	3.04802e+07	3.35154e+07	3.3002e+07	3.54222e+07	3.44477e+07	3.40199e+07	3.28092e+07	3.37445e+07	3.39425e+07	3.34443e+07	3.31284e+07	3.28381e+07	2.90987e+07
Lithuania	Agriculture, hunting, forestry, fishing (ISIC A-B)	1.03798e+09	9.8438e+08	1.05782e+09	1.13348e+09	1.11503e+09	1.13033e+09	1.00743e+09	1.13124e+09	1.15902e+09	1.17526e+09	1.09525e+09	1.18466e+09	1.32641e+09	1.28352e+09
Luxembourg	Agriculture, hunting, forestry, fishing (ISIC A-B)	2.44864e+08	1.98105e+08	2.78814e+08	1.59802e+08	1.91638e+08	1.32692e+08	1.35428e+08	1.44506e+08	1.05581e+08	1.26971e+08	1.17271e+08	9.89902e+07	1.16401e+08	1.08939e+08
Madagascar	Agriculture, hunting, forestry, fishing (ISIC A-B)	1.17777e+09	1.22512e+09	1.20927e+09	1.22496e+09	1.26256e+09	1.2941e+09	1.32186e+09	1.35151e+09	1.39133e+09	1.51009e+09	1.45811e+09	1.46778e+09	1.48912e+09	1.39828e+09
Malawi	Agriculture, hunting, forestry, fishing (ISIC A-B)	1.26567e+09	1.18984e+09	1.22181e+09	1.26903e+09	1.30498e+09	1.20332e+09	1.20813e+09	1.34345e+09	1.39128e+09	1.44682e+09	1.5445e+09	1.64747e+09	1.61039e+09	1.70792e+09
Malaysia	Agriculture, hunting, forestry, fishing (ISIC A-B)	1.01423e+10	1.01248e+10	1.0415e+10	1.10431e+10	1.15594e+10	1.18592e+10	1.25513e+10	1.27243e+10	1.32122e+10	1.32194e+10	1.35362e+10	1.43258e+10	1.44655e+10	1.47641e+10
Maldives	Agriculture, hunting, forestry, fishing (ISIC A-B)	5.40127e+07	6.17711e+07	6.99743e+07	7.18907e+07	7.33544e+07	7.77031e+07	8.11228e+07	7.14463e+07	6.90156e+07	6.72959e+07	6.67682e+07	6.74331e+07	6.74071e+07	6.85716e+07
Mali	Agriculture, hunting, forestry, fishing (ISIC A-B)	1.44167e+09	1.60527e+09	1.55332e+09	1.85581e+09	1.78045e+09	1.89859e+09	1.98067e+09	2.03011e+09	2.29844e+09	2.4283e+09	2.7063e+09	2.67025e+09	2.89902e+09	2.68534e+09
Malta	Agriculture, hunting, forestry, fishing (ISIC A-B)	1.14836e+08	1.32691e+08	1.32548e+08	1.28613e+08	1.24917e+08	1.23907e+08	1.26306e+08	1.17108e+08	8.56147e+07	1.01158e+08	1.02887e+08	9.8599e+07	1.02193e+08	1.09085e+08
Marshall Islands	Agriculture, hunting, forestry, fishing (ISIC A-B)	1.12294e+07	1.15395e+07	1.17935e+07	1.33255e+07	1.32826e+07	12028210	1.20501e+07	1.28613e+07	1.29349e+07	1.26996e+07	1.34437e+07	1.35241e+07	1.39574e+07	1.39574e+07
Mauritania	Agriculture, hunting, forestry, fishing (ISIC A-B)	5.75978e+08	5.8137e+08	5.63576e+08	5.87608e+08	5.68665e+08	6.15403e+08	6.15332e+08	6.74938e+08	7.29225e+08	7.38403e+08	7.76963e+08	7.61049e+08	8.10085e+08	8.80634e+08
Mauritius	Agriculture, hunting, forestry, fishing (ISIC A-B)	3.33903e+08	3.62149e+08	2.9878e+08	3.07996e+08	3.37113e+08	3.2299e+08	3.18111e+08	3.02374e+08	3.11562e+08	3.40062e+08	3.37456e+08	3.51188e+08	3.5062e+08	3.5209e+08
Mexico	Agriculture, hunting, forestry, fishing (ISIC A-B)	2.44982e+10	2.59538e+10	2.5709e+10	2.66834e+10	2.74443e+10	2.6437e+10	2.80609e+10	2.93595e+10	2.95608e+10	2.84223e+10	2.94007e+10	2.75935e+10	2.98718e+10	3.06548e+10
Micronesia (FS of)	Agriculture, hunting, forestry, fishing (ISIC A-B)	5.76424e+07	5.57053e+07	5.68186e+07	5.85384e+07	5.36169e+07	55861602	5.61883e+07	5.86619e+07	5.85759e+07	5.8011e+07	5.86769e+07	6.11512e+07	6.49123e+07	6.23403e+07
Mongolia	Agriculture, hunting, forestry, fishing (ISIC A-B)	5.12275e+08	4.14172e+08	3.68647e+08	3.86284e+08	4.48973e+08	4.99596e+08	5.32225e+08	6.09085e+08	6.37545e+08	6.6071e+08	5.51049e+08	5.48172e+08	6.66412e+08	7.56123e+08
Montenegro	Agriculture, hunting, forestry, fishing (ISIC A-B)	1.68729e+08	1.73055e+08	1.88234e+08	1.86519e+08	1.94183e+08	1.97671e+08	2.06601e+08	1.82475e+08	2.03557e+08	2.07288e+08	2.045e+08	2.27352e+08	2.03537e+08	2.36353e+08
Montserrat	Agriculture, hunting, forestry, fishing (ISIC A-B)	469574	370717	434268	451921	377778	377778	430737	395431	331880	384839	307165	398962	535252	506977
Morocco	Agriculture, hunting, forestry, fishing (ISIC A-B)	5.60543e+09	6.67615e+09	7.00703e+09	8.52685e+09	8.93236e+09	7.84714e+09	9.64798e+09	7.67776e+09	8.93945e+09	1.15937e+10	1.13447e+10	1.1951e+10	1.09737e+10	1.30425e+10
Mozambique	Agriculture, hunting, forestry, fishing (ISIC A-B)	1.24145e+09	1.37333e+09	1.53905e+09	1.61863e+09	1.70163e+09	1.8191e+09	2.00806e+09	2.17214e+09	2.30748e+09	2.44786e+09	2.58222e+09	2.73226e+09	2.78664e+09	2.88492e+09
Myanmar	Agriculture, hunting, forestry, fishing (ISIC A-B)	3.47821e+09	3.78081e+09	4.00883e+09	4.47818e+09	4.96995e+09	5.57017e+09	6.10812e+09	6.5932e+09	6.96245e+09	7.35055e+09	7.69419e+09	7.6574e+09	7.80695e+09	8.87892e+09
Namibia	Agriculture, hunting, forestry, fishing (ISIC A-B)	6.78624e+08	6.32486e+08	6.85161e+08	7.15839e+08	7.20358e+08	7.53696e+08	7.45141e+08	6.72444e+08	5.54817e+08	6.13725e+08	6.30837e+08	6.49563e+08	7.42645e+08	6.16125e+08
Nauru	Agriculture, hunting, forestry, fishing (ISIC A-B)	1.97925e+06	2.35981e+06	2.32396e+06	2.34183e+06	2.06135e+06	2.04662e+06	1.95092e+06	1.88466e+06	1.92147e+06	1.95092e+06	2.00991e+06	2.06419e+06	2.10718e+06	3.09671e+06
Nepal	Agriculture, hunting, forestry, fishing (ISIC A-B)	2.29224e+09	2.41779e+09	2.49231e+09	2.57526e+09	2.69913e+09	2.79354e+09	2.84332e+09	2.87099e+09	3.0382e+09	3.12994e+09	3.19291e+09	3.33693e+09	3.50316e+09	3.54733e+09
Netherlands	Agriculture, hunting, forestry, fishing (ISIC A-B)	1.15938e+10	1.1043e+10	1.11414e+10	1.14387e+10	1.21043e+10	1.21313e+10	1.20741e+10	1.23562e+10	1.26457e+10	1.31163e+10	1.28766e+10	1.26934e+10	1.27379e+10	1.29823e+10
Netherlands Antilles (former)	Agriculture, hunting, forestry, fishing (ISIC A-B)	2.09813e+07	3.00994e+07	2.36501e+07	2.17386e+07	2.17731e+07	2.39481e+07	1.9978e+07	2.06475e+07	2.14822e+07	2.11891e+07	2.11591e+07	2.12589e+07	2.12588e+07
New Caledonia	Agriculture, hunting, forestry, fishing (ISIC A-B)	1.15782e+08	1.27293e+08	1.04502e+08	1.01007e+08	1.07559e+08	9.65745e+07	1.13846e+08	8.74035e+07	9.59103e+07	9.30485e+07	9.00397e+07	9.91592e+07	9.92911e+07	1.00832e+08
New Zealand	Agriculture, hunting, forestry, fishing (ISIC A-B)	4.66426e+09	4.5733e+09	4.54781e+09	5.08041e+09	4.91826e+09	5.1828e+09	5.23598e+09	4.53375e+09	4.87344e+09	4.86509e+09	4.57198e+09	5.22455e+09	5.51283e+09	5.57567e+09
Nicaragua	Agriculture, hunting, forestry, fishing (ISIC A-B)	8.83416e+08	9.07124e+08	9.04796e+08	9.22402e+08	9.75062e+08	1.02013e+09	1.04532e+09	1.16544e+09	1.15972e+09	1.18292e+09	1.21039e+09	1.27793e+09	1.23026e+09	1.2411e+09
Niger	Agriculture, hunting, forestry, fishing (ISIC A-B)	1.0742e+09	1.21218e+09	1.30189e+09	1.36963e+09	1.25922e+09	1.43025e+09	1.57701e+09	1.65014e+09	1.91745e+09	1.73464e+09	2.00853e+09	1.94902e+09	2.20634e+09	2.20572e+09
Nigeria	Agriculture, hunting, forestry, fishing (ISIC A-B)	2.34485e+10	2.43585e+10	3.78001e+10	4.04396e+10	4.2984e+10	4.60169e+10	4.94235e+10	5.29779e+10	5.62976e+10	5.96075e+10	6.30782e+10	6.49175e+10	6.92697e+10	7.13039e+10
Norway	Agriculture, hunting, forestry, fishing (ISIC A-B)	3.65883e+09	3.57005e+09	3.87908e+09	3.80784e+09	4.23951e+09	4.33496e+09	4.49949e+09	4.82034e+09	5.02647e+09	5.09833e+09	5.50469e+09	5.7133e+09	5.99953e+09	5.98976e+09
Oman	Agriculture, hunting, forestry, fishing (ISIC A-B)	4.74672e+08	5.02027e+08	5.06978e+08	4.96653e+08	5.16324e+08	5.02435e+08	4.88304e+08	5.07905e+08	5.30923e+08	5.58726e+08	6.11754e+08	6.08767e+08	6.64622e+08	6.85208e+08
Pakistan	Agriculture, hunting, forestry, fishing (ISIC A-B)	2.41855e+10	2.36589e+10	2.36833e+10	2.46655e+10	2.52648e+10	2.69034e+10	2.85975e+10	2.95765e+10	3.01111e+10	3.11643e+10	3.12358e+10	3.18486e+10	3.29489e+10	3.40515e+10
Palau	Agriculture, hunting, forestry, fishing (ISIC A-B)	5.97742e+06	5.97896e+06	5.08118e+06	5.26123e+06	5.82924e+06	7590851	1.14052e+07	1.28905e+07	1.11964e+07	1.07309e+07	1.10475e+07	1.0989e+07	1.06531e+07	1.13436e+07
Panama	Agriculture, hunting, forestry, fishing (ISIC A-B)	8.05381e+08	8.57478e+08	8.85949e+08	9.68133e+08	9.81258e+08	1.0066e+09	1.04911e+09	1.05506e+09	1.1425e+09	1.05355e+09	9.04224e+08	8.92815e+08	9.25123e+08	1.09277e+09
Papua New Guinea	Agriculture, hunting, forestry, fishing (ISIC A-B)	1.5049e+09	1.43349e+09	1.42508e+09	1.53542e+09	1.53207e+09	1.6183e+09	1.63516e+09	1.7042e+09	1.77807e+09	1.78999e+09	1.84114e+09	1.99898e+09	1.94586e+09	1.95645e+09
Paraguay	Agriculture, hunting, forestry, fishing (ISIC A-B)	1.21136e+09	1.35245e+09	1.40869e+09	1.52176e+09	1.58112e+09	1.5792e+09	1.63625e+09	1.87087e+09	2.0426e+09	1.68902e+09	2.26729e+09	2.35206e+09	1.88571e+09	2.46531e+09
Peru	Agriculture, hunting, forestry, fishing (ISIC A-B)	4.71394e+09	4.61969e+09	4.84407e+09	4.90106e+09	5.0353e+09	5.21475e+09	5.65064e+09	5.87338e+09	6.31118e+09	6.36296e+09	6.48132e+09	6.99994e+09	7.10981e+09	7.30816e+09
Philippines	Agriculture, hunting, forestry, fishing (ISIC A-B)	1.09405e+10	1.13172e+10	1.1693e+10	1.2239e+10	1.27675e+10	1.30541e+10	1.35294e+10	1.41689e+10	1.46253e+10	1.45201e+10	1.44965e+10	1.48721e+10	1.529e+10	1.54574e+10
Poland	Agriculture, hunting, forestry, fishing (ISIC A-B)	7.4141e+09	7.90185e+09	8.00332e+09	8.25558e+09	8.97053e+09	8.84752e+09	8.4032e+09	8.73573e+09	8.49088e+09	9.60475e+09	8.96243e+09	9.08377e+09	8.65834e+09	9.06752e+09
Portugal	Agriculture, hunting, forestry, fishing (ISIC A-B)	4.56852e+09	4.44469e+09	4.62889e+09	4.53242e+09	4.79574e+09	4.52889e+09	4.65738e+09	4.45978e+09	4.61803e+09	4.46119e+09	4.48813e+09	4.52565e+09	4.4681e+09	4.59081e+09
Puerto Rico	Agriculture, hunting, forestry, fishing (ISIC A-B)	4.86043e+08	3.90805e+08	4.46634e+08	5.55009e+08	5.12316e+08	515600000	5.51725e+08	6.98191e+08	6.79101e+08	9.6039e+08	9.08036e+08	7.97822e+08	7.78505e+08	8.16408e+08
Qatar	Agriculture, hunting, forestry, fishing (ISIC A-B)	5.97761e+07	5.97761e+07	4.4583e+07	4.95644e+07	5.00625e+07	5.93407e+07	6.90994e+07	7.60473e+07	1.03943e+08	8.61797e+07	1.03275e+08	1.08829e+08	1.13789e+08	1.2158e+08
Republic of Korea	Agriculture, hunting, forestry, fishing (ISIC A-B)	2.44595e+10	2.48027e+10	2.49608e+10	2.48899e+10	2.72394e+10	2.55099e+10	2.5423e+10	2.49168e+10	2.43948e+10	2.63968e+10	2.81251e+10	2.75756e+10	2.73394e+10	2.89125e+10
Republic of Moldova	Agriculture, hunting, forestry, fishing (ISIC A-B)	3.9912e+08	4.28592e+08	4.50323e+08	4.01165e+08	4.82903e+08	4.90082e+08	4.76246e+08	3.09777e+08	4.37232e+08	3.93735e+08	4.22842e+08	4.44657e+08	3.55089e+08	5.00719e+08
Romania	Agriculture, hunting, forestry, fishing (ISIC A-B)	6.71036e+09	8.60272e+09	8.10887e+09	8.53003e+09	1.01258e+10	8.3867e+09	8.66566e+09	7.3674e+09	8.89878e+09	8.60759e+09	8.13446e+09	9.26994e+09	6.98865e+09	8.62104e+09
Russian Federation	Agriculture, hunting, forestry, fishing (ISIC A-B)	2.86994e+10	3.18733e+10	3.27985e+10	3.23022e+10	3.26758e+10	3.25159e+10	3.34253e+10	3.38245e+10	3.57839e+10	3.63736e+10	3.20164e+10	3.65211e+10	3.52269e+10	3.63123e+10
Rwanda	Agriculture, hunting, forestry, fishing (ISIC A-B)	7.67105e+08	8.26538e+08	9.66184e+08	9.36545e+08	9.53501e+08	1.01535e+09	1.04341e+09	1.05285e+09	1.12521e+09	1.19023e+09	1.25e+09	1.30453e+09	1.38842e+09	1.43456e+09
Saint Kitts and Nevis	Agriculture, hunting, forestry, fishing (ISIC A-B)	5.42881e+06	5.98265e+06	7.38557e+06	7.52063e+06	8.59388e+06	9.0913e+06	5.90869e+06	6.09888e+06	6.44489e+06	5.76132e+06	5.90082e+06	6.57328e+06	6.08398e+06	6.45199e+06
Saint Lucia	Agriculture, hunting, forestry, fishing (ISIC A-B)	4.75749e+07	3.67307e+07	4.00607e+07	3.5689e+07	3.65709e+07	2.82407e+07	3.0786e+07	3.072e+07	3.93315e+07	3.78956e+07	2.97929e+07	2.58761e+07	2.80357e+07	2.66606e+07
Samoa	Agriculture, hunting, forestry, fishing (ISIC A-B)	6.43218e+07	6.18515e+07	5.79756e+07	5.44337e+07	5.149e+07	5.40555e+07	5.21653e+07	5.40668e+07	4.84848e+07	4.84024e+07	4.51764e+07	4.56849e+07	4.32002e+07	4.50412e+07
San Marino	Agriculture, hunting, forestry, fishing (ISIC A-B)	1.15789e+06	1.15022e+06	1.10789e+06	1.11116e+06	1.13282e+06	989630	964626	960594	945902	845279	782932	842116	848228	883713
Sao Tome and Principe	Agriculture, hunting, forestry, fishing (ISIC A-B)	2.09609e+07	2.15269e+07	2.15298e+07	2.20639e+07	2.28907e+07	2.32536e+07	2.46287e+07	2.53156e+07	2.74908e+07	2.85639e+07	2.82026e+07	2.84959e+07	3.0912e+07	3.16959e+07
Saudi Arabia	Agriculture, hunting, forestry, fishing (ISIC A-B)	9.84111e+09	9.89669e+09	1.00237e+10	1.01054e+10	1.04682e+10	1.05791e+10	1.06859e+10	1.08941e+10	1.10389e+10	1.11527e+10	1.10419e+10	1.12812e+10	1.14251e+10	1.15103e+10
Senegal	Agriculture, hunting, forestry, fishing (ISIC A-B)	1.20638e+09	1.22175e+09	9.4994e+08	1.11927e+09	1.14596e+09	1.27223e+09	1.16545e+09	1.09788e+09	1.3123e+09	1.4833e+09	1.56999e+09	1.33818e+09	1.45689e+09	1.35108e+09
Serbia	Agriculture, hunting, forestry, fishing (ISIC A-B)	2.2736e+09	2.66621e+09	2.48384e+09	2.31209e+09	2.75286e+09	2.61951e+09	2.61771e+09	2.41128e+09	2.62108e+09	2.49616e+09	2.65555e+09	2.68076e+09	2.21725e+09	2.68087e+09
Seychelles	Agriculture, hunting, forestry, fishing (ISIC A-B)	3.14599e+07	2.98989e+07	3.04592e+07	2.79777e+07	2.77776e+07	2.99127e+07	2.83103e+07	2.85472e+07	2.98734e+07	2.49459e+07	2.33955e+07	2.42092e+07	2.33009e+07	1.79686e+07
Sierra Leone	Agriculture, hunting, forestry, fishing (ISIC A-B)	4.19674e+08	4.864e+08	6.40766e+08	7.01448e+08	7.63114e+08	8.15203e+08	8.63848e+08	9.78332e+08	1.04371e+09	1.08568e+09	1.12387e+09	1.17884e+09	1.22418e+09	1.27992e+09
Singapore	Agriculture, hunting, forestry, fishing (ISIC A-B)	9.57103e+07	8.53762e+07	7.0476e+07	6.48883e+07	6.27254e+07	6.40472e+07	6.63303e+07	6.73517e+07	6.42274e+07	6.62702e+07	7.17377e+07	7.40208e+07	7.54627e+07	7.2699e+07
Sint Maarten (Dutch part)	Agriculture, hunting, forestry, fishing (ISIC A-B)						3.12849e+06	3.44374e+06	3.31248e+06	3.01449e+06	2.23179e+06	1.6704e+06	1.46257e+06	1.27081e+06	1.49884e+06
Slovakia	Agriculture, hunting, forestry, fishing (ISIC A-B)	1.16568e+09	1.41791e+09	1.57165e+09	1.63857e+09	1.62186e+09	1.55543e+09	1.6714e+09	1.91712e+09	2.13069e+09	2.08476e+09	1.77639e+09	2.10797e+09	2.1678e+09	2.59145e+09
Slovenia	Agriculture, hunting, forestry, fishing (ISIC A-B)	8.13936e+08	8.14195e+08	9.39765e+08	6.88649e+08	8.79674e+08	8.305e+08	8.23892e+08	8.6841e+08	8.72721e+08	7.9089e+08	8.09021e+08	8.71256e+08	8.01977e+08	7.66537e+08
Solomon Islands	Agriculture, hunting, forestry, fishing (ISIC A-B)	1.02768e+08	9.91764e+07	1.03922e+08	1.23775e+08	1.31473e+08	1.28528e+08	1.33363e+08	1.53798e+08	1.52757e+08	1.54675e+08	1.80246e+08	1.84643e+08	1.83889e+08	1.95771e+08
Somalia	Agriculture, hunting, forestry, fishing (ISIC A-B)	1.0602e+09	1.14704e+09	1.15736e+09	1.16894e+09	1.19699e+09	1.22213e+09	1.26979e+09	1.29392e+09	1.32756e+09	1.36606e+09	1.39884e+09	1.43521e+09	1.43569e+09	1.47349e+09
South Africa	Agriculture, hunting, forestry, fishing (ISIC A-B)	5.72492e+09	5.53861e+09	5.90023e+09	5.94048e+09	5.99151e+09	6.15977e+09	5.82336e+09	5.99674e+09	7.1609e+09	7.02531e+09	7.00428e+09	7.09599e+09	7.13837e+09	7.24717e+09
South Sudan	Agriculture, hunting, forestry, fishing (ISIC A-B)									3.49253e+08	4.91223e+08	5.0608e+08	4.31708e+08	2.09452e+08	2.29928e+08
Spain	Agriculture, hunting, forestry, fishing (ISIC A-B)	3.55176e+10	3.4981e+10	3.52864e+10	3.50111e+10	3.4126e+10	3.13859e+10	3.32425e+10	3.56222e+10	3.46566e+10	3.33971e+10	3.41118e+10	3.55423e+10	3.10068e+10	3.58323e+10
Sri Lanka	Agriculture, hunting, forestry, fishing (ISIC A-B)	2.84197e+09	2.73371e+09	2.78646e+09	2.83317e+09	2.83323e+09	2.88469e+09	3.06714e+09	3.17118e+09	3.41005e+09	3.51979e+09	3.76446e+09	3.81894e+09	4.03897e+09	4.20615e+09
St. Vincent and the Grenadines	Agriculture, hunting, forestry, fishing (ISIC A-B)	3.10526e+07	2.89354e+07	3.22622e+07	3.06332e+07	2.94904e+07	3.01489e+07	3.12073e+07	3.46322e+07	3.34075e+07	3.84074e+07	3.15603e+07	3.15096e+07	3.18259e+07	3.38502e+07
State of Palestine	Agriculture, hunting, forestry, fishing (ISIC A-B)	3.82042e+08	3.18744e+08	2.62527e+08	2.96429e+08	3.21855e+08	253300000	2.57913e+08	3.21426e+08	3.61443e+08	3.72816e+08	3.57152e+08	4.38474e+08	3.63804e+08	3.3076e+08
Sudan	Agriculture, hunting, forestry, fishing (ISIC A-B)									1.36027e+10	1.3984e+10	1.56921e+10	1.53218e+10	1.47474e+10	1.5383e+10
Sudan (Former)	Agriculture, hunting, forestry, fishing (ISIC A-B)	9.985e+09	1.09812e+10	1.08763e+10	1.08926e+10	1.1075e+10	1.16064e+10	1.23623e+10	1.29556e+10	1.39519e+10	1.44666e+10	1.61915e+10
Suriname	Agriculture, hunting, forestry, fishing (ISIC A-B)	2.19098e+08	2.44151e+08	2.34766e+08	2.43415e+08	2.45541e+08	2.33363e+08	2.45569e+08	2.58932e+08	2.3498e+08	3.08801e+08	3.1766e+08	3.31898e+08	3.65752e+08	3.3253e+08
Swaziland	Agriculture, hunting, forestry, fishing (ISIC A-B)	1.72928e+08	1.58409e+08	1.66846e+08	1.74991e+08	1.69992e+08	1.7912e+08	1.74765e+08	1.79372e+08	1.79246e+08	1.77548e+08	1.83409e+08	1.88135e+08	2.1624e+08	1.90365e+08
Sweden	Agriculture, hunting, forestry, fishing (ISIC A-B)	3.47629e+09	3.62044e+09	3.7005e+09	3.74373e+09	4.05037e+09	3.90588e+09	4.36753e+09	4.57957e+09	4.51317e+09	4.38536e+09	4.13165e+09	4.1282e+09	4.16864e+09	4.28164e+09
Switzerland	Agriculture, hunting, forestry, fishing (ISIC A-B)	3.90621e+09	3.61059e+09	3.61615e+09	3.23691e+09	3.66049e+09	3.52022e+09	3.45928e+09	3.57105e+09	3.63267e+09	3.70963e+09	3.58791e+09	3.86364e+09	3.68434e+09	3.60216e+09
Syrian Arab Republic	Agriculture, hunting, forestry, fishing (ISIC A-B)	4.8581e+09	5.20869e+09	5.66708e+09	5.51661e+09	5.40499e+09	5.76264e+09	6.37811e+09	5.5152e+09	5.14275e+09	5.78246e+09	5.21911e+09	5.21911e+09	4.1231e+09	3.50463e+09
Tajikistan	Agriculture, hunting, forestry, fishing (ISIC A-B)	3.03639e+08	3.27923e+08	3.74615e+08	4.13499e+08	4.76678e+08	4.90026e+08	5.16466e+08	5.50046e+08	5.92952e+08	6.55114e+08	6.99587e+08	7.02291e+08	7.68977e+08	8.25881e+08
TFYR of Macedonia	Agriculture, hunting, forestry, fishing (ISIC A-B)	6.02824e+08	5.3626e+08	5.43119e+08	5.56209e+08	5.82103e+08	6.0935e+08	6.3078e+08	6.71855e+08	7.0815e+08	6.98818e+08	7.44295e+08	7.37451e+08	7.3983e+08	7.64141e+08
Thailand	Agriculture, hunting, forestry, fishing (ISIC A-B)	1.52488e+10	1.5719e+10	1.57385e+10	1.76183e+10	1.74226e+10	1.74137e+10	1.80983e+10	1.84413e+10	1.89821e+10	1.88045e+10	1.83418e+10	1.97285e+10	2.04101e+10	2.06885e+10
Timor-Leste	Agriculture, hunting, forestry, fishing (ISIC A-B)	1.1746e+08	1.1746e+08	1.25345e+08	1.23433e+08	1.2925e+08	134525596	1.41494e+08	1.3686e+08	1.37223e+08	1.48399e+08	1.44096e+08	1.18346e+08	1.35611e+08	1.33835e+08
Togo	Agriculture, hunting, forestry, fishing (ISIC A-B)	7.63725e+08	7.83024e+08	8.39403e+08	8.58438e+08	8.4612e+08	8.28559e+08	8.69303e+08	8.98266e+08	9.31569e+08	1.00848e+09	1.03188e+09	8.32238e+08	8.7942e+08	8.74771e+08
Tonga	Agriculture, hunting, forestry, fishing (ISIC A-B)	4.66911e+07	4.58313e+07	4.61742e+07	4.66378e+07	4.76585e+07	4.66281e+07	4.39231e+07	4.44061e+07	4.20554e+07	4.1508e+07	4.17012e+07	4.25062e+07	4.27317e+07	4.43417e+07
Trinidad and Tobago	Agriculture, hunting, forestry, fishing (ISIC A-B)	1.1456e+08	1.11266e+08	1.18037e+08	1.01384e+08	7.74103e+07	8.38154e+07	6.77111e+07	6.59909e+07	6.1672e+07	6.0025e+07	6.73817e+07	6.94863e+07	5.86708e+07	6.08119e+07
Tunisia	Agriculture, hunting, forestry, fishing (ISIC A-B)	2.73175e+09	2.66179e+09	2.39659e+09	2.82781e+09	3.21006e+09	2.9593e+09	3.19385e+09	3.2201e+09	3.19881e+09	3.4931e+09	3.17432e+09	3.50117e+09	3.72869e+09	3.61462e+09
Turkey	Agriculture, hunting, forestry, fishing (ISIC A-B)	4.17597e+10	3.84675e+10	4.18351e+10	4.09994e+10	4.21593e+10	4.51879e+10	4.58026e+10	4.26787e+10	4.45404e+10	4.61221e+10	4.72118e+10	5.00702e+10	5.16306e+10	5.34248e+10
Turkmenistan	Agriculture, hunting, forestry, fishing (ISIC A-B)	2.53952e+09	2.74534e+09	2.42323e+09	2.28568e+09	2.30405e+09	2.62941e+09	2.70764e+09	3.29534e+09	2.42686e+09	2.56704e+09	3.33143e+09	3.64883e+09	4.14815e+09	4.56416e+09
Turks and Caicos Islands	Agriculture, hunting, forestry, fishing (ISIC A-B)	5.63216e+06	5.96497e+06	4.71907e+06	5.6858e+06	6.27462e+06	6644000	6.75616e+06	6.53184e+06	4.99824e+06	5.06285e+06	4.10831e+06	4.37529e+06	2.93799e+06	3.73008e+06
Tuvalu	Agriculture, hunting, forestry, fishing (ISIC A-B)	4.77704e+06	4.65059e+06	4.21303e+06	4.22336e+06	4.41288e+06	4.4522e+06	5.00277e+06	5.05852e+06	5.09518e+06	5.267e+06	6.02609e+06	6.04747e+06	5.6664e+06	5.87223e+06
U.R. of Tanzania: Mainland	Agriculture, hunting, forestry, fishing (ISIC A-B)	4.11922e+09	4.32219e+09	4.54013e+09	4.68625e+09	4.96308e+09	5.18234e+09	5.38326e+09	5.60114e+09	6.02156e+09	6.32888e+09	6.49891e+09	6.72511e+09	6.94351e+09	7.16581e+09
Uganda	Agriculture, hunting, forestry, fishing (ISIC A-B)	2.94241e+09	3.25353e+09	3.35088e+09	3.42347e+09	3.4608e+09	3.54689e+09	3.48224e+09	3.5415e+09	3.62216e+09	3.73672e+09	3.8457e+09	3.88748e+09	3.95677e+09	4.0177e+09
Ukraine	Agriculture, hunting, forestry, fishing (ISIC A-B)	6.62052e+09	7.28384e+09	7.42303e+09	6.59794e+09	7.898e+09	7.92022e+09	8.05174e+09	7.55469e+09	8.82895e+09	8.65239e+09	8.67038e+09	1.0367e+10	9.95196e+09	1.00828e+10
United Arab Emirates	Agriculture, hunting, forestry, fishing (ISIC A-B)	2.74025e+09	2.67876e+09	2.76475e+09	2.67859e+09	2.6258e+09	2.52041e+09	2.3026e+09	2.26025e+09	2.014e+09	2.00573e+09	1.79486e+09	1.79767e+09	1.69848e+09	1.67894e+09
United Kingdom	Agriculture, hunting, forestry, fishing (ISIC A-B)	1.27893e+10	1.18095e+10	1.32723e+10	1.28609e+10	1.27481e+10	1.34582e+10	1.30468e+10	1.25744e+10	1.38986e+10	1.29752e+10	1.2963e+10	1.40556e+10	1.34018e+10	1.287e+10
United States	Agriculture, hunting, forestry, fishing (ISIC A-B)	1.06964e+11	1.01505e+11	1.05347e+11	1.15457e+11	1.22736e+11	128600000000	1.33857e+11	1.15558e+11	1.23343e+11	1.39216e+11	1.41844e+11	1.35475e+11	1.30925e+11	1.46697e+11
Uruguay	Agriculture, hunting, forestry, fishing (ISIC A-B)	1.32255e+09	1.21276e+09	1.24075e+09	1.36022e+09	1.47161e+09	1.51853e+09	1.59842e+09	1.43546e+09	1.46607e+09	1.56962e+09	1.44221e+09	1.84555e+09	1.84153e+09	1.92516e+09
USSR (Former)	Agriculture, hunting, forestry, fishing (ISIC A-B)
Uzbekistan	Agriculture, hunting, forestry, fishing (ISIC A-B)	2.75086e+09	2.86365e+09	3.03547e+09	3.24188e+09	3.56931e+09	3.7906e+09	4.02562e+09	4.27118e+09	4.46339e+09	4.7178e+09	5.03861e+09	5.37116e+09	5.90471e+09	6.28598e+09
Vanuatu	Agriculture, hunting, forestry, fishing (ISIC A-B)	8.00805e+07	7.98417e+07	7.92684e+07	8.22269e+07	8.59808e+07	8.79759e+07	8.92622e+07	9.23861e+07	9.47487e+07	9.53699e+07	9.99639e+07	1.06028e+08	1.08382e+08	1.09817e+08
Venezuela	Agriculture, hunting, forestry, fishing (ISIC A-B)	4.69501e+09	4.79064e+09	4.75232e+09	4.69011e+09	4.89551e+09	5.37699e+09	5.43261e+09	5.57322e+09	5.76746e+09	5.82514e+09	5.87871e+09	5.83055e+09	5.946e+09	5.84543e+09
Viet Nam	Agriculture, hunting, forestry, fishing (ISIC A-B)	9.19599e+09	9.47033e+09	9.86489e+09	1.02222e+10	1.06681e+10	1.10968e+10	1.15183e+10	1.19739e+10	1.25357e+10	1.27751e+10	1.31956e+10	1.37265e+10	1.40944e+10	1.44453e+10
Yemen	Agriculture, hunting, forestry, fishing (ISIC A-B)	1.45355e+09	1.52121e+09	1.54417e+09	1.60643e+09	1.73906e+09	1.80768e+09	1.98475e+09	2.1647e+09	2.28302e+09	2.42861e+09	2.6022e+09	2.7018e+09	2.78837e+09	2.74657e+09
Yemen Arab Republic (Former)	Agriculture, hunting, forestry, fishing (ISIC A-B)
Yemen Democratic (Former)	Agriculture, hunting, forestry, fishing (ISIC A-B)
Yugoslavia (Former)	Agriculture, hunting, forestry, fishing (ISIC A-B)
Zambia	Agriculture, hunting, forestry, fishing (ISIC A-B)	1.44418e+09	1.40742e+09	1.38345e+09	1.45311e+09	1.51491e+09	1.50636e+09	1.53967e+09	1.54629e+09	1.58586e+09	1.70052e+09	1.81271e+09	1.95834e+09	2.09727e+09	1.94207e+09
Zanzibar	Agriculture, hunting, forestry, fishing (ISIC A-B)	8.27395e+07	9.42059e+07	9.27489e+07	9.66607e+07	9.93613e+07	1.0218e+08	1.21273e+08	1.20741e+08	1.27676e+08	1.33418e+08	1.3742e+08	1.41256e+08	1.44091e+08	1.49261e+08
Zimbabwe	Agriculture, hunting, forestry, fishing (ISIC A-B)	9.76082e+08	1.10046e+09	8.67767e+08	7.88876e+08	7.28543e+08	683948000	6.546e+08	6.08395e+08	4.15407e+08	5.84447e+08	6.26646e+08	6.35453e+08	6.85247e+08	6.67632e+08
Albania	Changes in inventories	9.15469e+07	1.14072e+08	1.19202e+08	1.40603e+08	1.44421e+08	1.51434e+08	1.71101e+08	1.80434e+08	1.87579e+08	2.01001e+08	2.22459e+08	2.46876e+08	3.39904e+08	3.29204e+08
Algeria	Changes in inventories	6.8754e+09	7.24667e+09	7.85539e+09	8.19317e+09	8.86501e+09	9.58308e+09	1.01772e+10	1.12051e+10	1.25946e+10	1.37029e+10	1.46621e+10	1.50873e+10	1.61736e+10	1.75645e+10
Andorra	Changes in inventories	9.59028e+06	7.98365e+06	6.88654e+06	4.70372e+06	6.9022e+06	4.02803e+06	8.26035e+06	9.82667e+06	1.19379e+07	7.12991e+06	1.45573e+07	1.32361e+07	1.14792e+07	1.15474e+07
Angola	Changes in inventories			1.60588e+08	1.67172e+08	1.33776e+08	1.42772e+08	2.36502e+08	3.26829e+08	4.33317e+08	4.47889e+08	4.63342e+08	4.8129e+08	5.05607e+08	4.91323e+08
Argentina	Changes in inventories					9.1815e+09	1.75323e+09	3.42655e+09	7.60606e+09	5.09445e+09	-1.39384e+10	8.75403e+09	4.89446e+09	-8.71341e+09	-1.02387e+10
Armenia	Changes in inventories	4.69316e+06	5.31018e+07	1.71274e+07	4.47686e+07	4.22997e+07	3.28937e+07	2.17507e+07	5.82866e+07	8.65006e+07	-1.19356e+08	-4.23639e+07	9.78195e+07	1.6118e+08	7.07029e+07
Australia	Changes in inventories	-1.20892e+10	-6.97458e+09	8.50338e+09	-3.0776e+10	-4.41852e+10	-2.6713e+09	-3.6594e+10	-5.56519e+10	1.15071e+09	-5.90125e+09	-4.8849e+10	-3.85835e+10	-1.49832e+10	1.87349e+10
Austria	Changes in inventories	9.80966e+08	1.12055e+09	5.78518e+08	1.03061e+09	1.43231e+09	2.18549e+09	2.79239e+09	4.48054e+09	3.23091e+09	1.14893e+09	2.39276e+09	3.93751e+09	3.36785e+09	1.58464e+09
Azerbaijan	Changes in inventories	7.77361e+06	9.3719e+06	1.49674e+07	2.41837e+07	2.83001e+07	2.99338e+07	3.42704e+07	3.63469e+07	4.39044e+07	3.78158e+07	3.85516e+07	3.88962e+07	4.04656e+07	4.22934e+07
Bahamas	Changes in inventories	1.40709e+08	9.53192e+07	8.88831e+07	8.08579e+07	7.79132e+07	84183669	8.40337e+07	8.26119e+07	8.1051e+07	8.23862e+07	8.36497e+07	1.13874e+08	6.7462e+07	8.70582e+07
Bahrain	Changes in inventories	2.06151e+08	3.68605e+08	-2.22127e+08	-1.8127e+08	2.22028e+08	2.21638e+08	2.62519e+08	1.62913e+07	3.29561e+07	4.74035e+07	2.48213e+08	1.36483e+08	-2.46537e+07	1.71655e+08
Barbados	Changes in inventories	2.16311e+06	-345155	2.15362e+06	3.26308e+06	4.76625e+06	4850000	5.11688e+06	5.20834e+06	5.36131e+06	4.59903e+06	4.30968e+06	4.78758e+06	4.7293e+06	3.23124e+06
Belarus	Changes in inventories	7.36489e+07	2.28399e+08	8.85718e+07	3.11663e+08	8.22789e+08	5.87236e+08	8.24339e+08	9.54492e+08	1.65899e+09	5.14448e+08	7.17665e+08	-2.29527e+08	8.08519e+08	8.79901e+08
Belgium	Changes in inventories	8.92892e+09	2.0314e+09	1.02722e+09	1.54166e+09	3.50339e+09	5.62006e+09	7.40027e+09	8.92874e+09	9.41791e+09	2.43474e+09	4.9319e+09	9.11415e+09	4.02006e+09	3.16024e+08
Belize	Changes in inventories	2.29406e+07	-2.83272e+06	8.92589e+06	1.40643e+07	2.12543e+07	26770619	9.62393e+06	8.29222e+06	2.12032e+07	1.70979e+06	-2.68544e+07	1.98062e+07	-1.91305e+06	3.22902e+06
Benin	Changes in inventories	-3.06019e+06	3.23964e+07	-1.20878e+07	1.36026e+07	4.76066e+07	-5.22904e+07	4.15931e+07	3.55943e+07	9.85721e+06	1.87644e+07	2.87036e+07	2.78204e+07	6.88697e+07	7.56469e+07
Bermuda	Changes in inventories	2.55621e+07	4.30284e+07	4.84913e+07	5.63506e+07	7.67445e+07	47324041	4.6947e+07
Bhutan	Changes in inventories	4.23279e+06	-2.32076e+06	1.97964e+06	1.18303e+06	881528	-121027	-334588	1.2835e+07	-5.32164e+06
Bolivia	Changes in inventories	1.08823e+07	6.91332e+07	7.38048e+07	3.64491e+07	-1.02425e+08	1.20592e+08	-7.58658e+07	-1.07202e+08	3.46884e+07	5.51636e+07	5.28072e+07	6.09451e+07	-1.00156e+08	-3.4114e+07
Bosnia and Herzegovina	Changes in inventories	5.50927e+06	5.45858e+06	6.304e+06	6.61589e+06	8.27922e+07	8.26592e+06	-2.4162e+07	1.13908e+08	1.19996e+08	-6.81711e+06	-4.43466e+07	9.25551e+06	2.44398e+07	9.71836e+06
Botswana	Changes in inventories	4.89112e+08	3.0855e+08	2.8306e+08	2.47032e+08	2.48864e+08	1.79808e+08	-3.49991e+07	1.925e+08	5.53997e+08	2.93667e+08	5.4701e+08	5.24517e+08	8.7346e+07	1.28497e+08
Brazil	Changes in inventories	1.00825e+10	7.66576e+09	2.63673e+09	4.5155e+09	6.79615e+09	2.35747e+09	3.00213e+09	5.74223e+09	8.52915e+09	-2.61515e+09	-3.17305e+09	-3.32268e+09	-3.1902e+09	-3.35536e+09
British Virgin Islands	Changes in inventories	-7.73342e+06	-9.64401e+06	-9.60558e+06	-1.0302e+07	-1.122e+07	-14000000	-1.40412e+07	-1.49315e+07	-1.51262e+07	-1.67514e+07	-1.76667e+07	-1.79692e+07	-1.71733e+07	-1.7459e+07
Brunei Darussalam	Changes in inventories	8.16101e+06	-1.71381e+07	5.71271e+06	6.52881e+06	5.16614e+06	1.16369e+06	-2.63569e+06	-913217	-2.4483e+06	0	571271		489660	351739
Bulgaria	Changes in inventories	4.02226e+08	3.47846e+08	2.87584e+08	5.17118e+08	6.48827e+08	6.13281e+08	1.32461e+09	1.56154e+09	1.28813e+09	1.50791e+08	1.27429e+08	2.03602e+08	2.52646e+08	7.58908e+07
Burkina Faso	Changes in inventories	-2.90991e+08	7.39204e+07	2.59693e+07	1.54479e+08	1.09968e+08	2.40796e+08	1.18952e+08	6.30018e+07	3.4703e+08	1.7401e+08	2.12429e+08	1.40005e+08	-9.79494e+07	-1.04904e+08
Burundi	Changes in inventories						-1.01981e+06	1.76182e+07	6.82557e+06	993292	1.06193e+07	1.68431e+07	-5.151e+07
Cabo Verde	Changes in inventories	2.43627e+07	3.5021e+07	3.52443e+07	4.09448e+07	5.25517e+07	4.52643e+07	4.46e+07	7.85536e+07	8.99269e+07	7.84568e+07	3.51152e+07	8.98253e+06	8.42264e+06	8.51256e+06
Cambodia	Changes in inventories	-2.76352e+07	1.17188e+08	-3.5898e+07	7.00258e+07	-9.60102e+07	-2.65192e+07	5.86482e+07	1.1407e+08	1.33641e+08	1.35727e+08	1.58581e+08	1.58581e+08	1.66267e+08	1.77931e+08
Cameroon	Changes in inventories	2.62003e+08	3.20922e+08	-1.74013e+08	3.65113e+08	2.22914e+08	2.30277e+08	4.16346e+08	-3.8423e+07	3.08893e+08	5.53856e+08	8.80684e+07	7.02964e+06	6.73299e+07	5.5013e+07
Canada	Changes in inventories	1.21419e+10	-3.03979e+09	-1.80544e+09	4.57229e+09	4.67599e+09	9.3203e+09	7.40468e+09	6.43678e+09	5.37959e+09	-4.06386e+09	-6.95674e+08	8.85364e+09	6.85736e+09	8.26095e+09
Central African Republic	Changes in inventories	4.69275e+06	4.36721e+06	4.07972e+06	2.52407e+06	2.75829e+06	4.04953e+06	1.09209e+07	1.1509e+07	2.05074e+07	1.91949e+07	4.20581e+07	5.02438e+07	4.61471e+07	1.62936e+07
Chad	Changes in inventories	1.02621e+07	2.99056e+08	5.84207e+07	2.43801e+08	8.83887e+07	2.85677e+08	-2.52497e+07	-1.41529e+07	5.95045e+07	6.5812e+07	8.14753e+07	8.31048e+07	9.71495e+07	1.07544e+08
Chile	Changes in inventories	1.06868e+09	4.8141e+08	6.06688e+08	1.03929e+09	5.60981e+08	5.52404e+08	1.87008e+09	7.86679e+08	1.82429e+09	-2.67129e+09	1.34189e+09	1.43568e+09	1.10793e+09	-2.49167e+08
China	Changes in inventories	1.48778e+10	2.93419e+10	2.75046e+10	3.34285e+10	5.0323e+10	4.42246e+10	5.79653e+10	7.78091e+10	1.01315e+11	7.71922e+10	9.42424e+10	1.10944e+11	9.39338e+10	9.43404e+10
China: Hong Kong SAR	Changes in inventories	1.00184e+09	-4.01365e+08	4.09599e+08	6.53884e+08	4.5728e+08	-6.12164e+08	-3.1361e+08	9.88355e+08	5.219e+08	1.82402e+09	3.12356e+09	9.20833e+08	-2.86791e+08	-1.36112e+08
China: Macao SAR	Changes in inventories	-3.02266e+06	-1.27322e+07	3.56859e+07	4.60673e+07	9.81904e+07	8.08881e+07	1.23819e+08	9.06207e+07	1.29875e+08	9.94881e+06	1.98652e+08	4.62944e+08	4.13957e+08	4.72028e+08
Colombia	Changes in inventories	9.34578e+08	7.94542e+08	6.8079e+08	7.31203e+08	8.25134e+08	8.13931e+08	1.29221e+09	9.7982e+08	8.01867e+08	-4.43375e+08	5.95476e+08	6.63124e+08	6.06248e+08	2.23196e+08
Congo	Changes in inventories	1.74009e+07	3.02625e+06	3.93412e+07	2.421e+07	2.91276e+07	2.36981e+07	1.46928e+07	1.61621e+07	1.55095e+07	8.73829e+07
Costa Rica	Changes in inventories	-4.8872e+08	5.23794e+08	7.07375e+08	1.52226e+08	7.0969e+08	1.12018e+09	1.43044e+09	3.66779e+08	1.02697e+09	-1.00649e+09	4.15738e+08	7.29686e+08	6.60359e+08	1.91792e+08
Côte d'Ivoire	Changes in inventories	4.38438e+08	4.18482e+08	4.35704e+08	3.9002e+08	3.85886e+08	3.69179e+08	3.45399e+08	3.7348e+08	4.26165e+08	4.29895e+08	4.40213e+08	3.77224e+08	7.61497e+08	1.29488e+09
Croatia	Changes in inventories	9.59548e+07	6.35511e+08	1.3687e+09	9.09806e+08	8.15889e+08	1.1491e+09	1.5267e+09	1.44844e+09	1.68559e+09	-8.19226e+07	3.74929e+07	1.61376e+08	-1.70346e+08	-2.18212e+08
Cuba	Changes in inventories	1.76127e+08	3.05286e+08	2.09395e+08	9.58911e+07	2.90609e+08	773000000	2.92566e+08	2.97458e+08	1.15754e+09
Curaçao	Changes in inventories	-4.2155e+07	1.15395e+08	4.33216e+07	4.29798e+07	2.49593e+07	1.22209e+07	-6.15249e+07	-1.06942e+08	-2.56227e+07	-5.97559e+06	5.22607e+07	6.58251e+06	1.84938e+07	2.71688e+07
Cyprus	Changes in inventories	1.72886e+08	7.47327e+07	2.17066e+08	3.76857e+07	2.41338e+08	1.76186e+08	-1.12738e+08	-2.56987e+08	-9.28304e+07	-3.4822e+08	2.76149e+08	-3.72599e+06	2.00458e+08	-2.69762e+08
Czech Republic	Changes in inventories	7.19772e+08	9.6766e+08	8.91033e+08	4.21644e+08	1.32234e+09	1.06852e+09	2.36831e+09	2.96401e+09	2.54002e+09	-6.907e+08	2.4823e+08	5.0233e+08	2.26849e+08	-4.23699e+06
Czechoslovakia (Former)	Changes in inventories
D.R. of the Congo	Changes in inventories	4.85326e+06	3.79821e+06	4.22023e+06	1.01285e+07	1.24497e+07	1.24497e+07	8.01843e+06	8.22945e+06	8.44046e+06	8.86248e+06	1.22387e+07	1.8991e+07	6.33034e+06	4.98831e+07
Denmark	Changes in inventories	1.97335e+09	1.49174e+09	1.96822e+09	9.34192e+08	2.44094e+09	2.5208e+09	2.27018e+09	3.21796e+09	2.01687e+09	-2.8495e+09	-1.05666e+08	1.36505e+09	-7.89997e+07	1.25576e+08
Dominican Republic	Changes in inventories	5.86872e+08	5.68812e+08	5.27938e+08	6.56579e+07	4.84246e+07	4.79964e+07	3.7141e+07	3.97403e+07	4.22194e+07	4.4105e+07	4.75381e+07	4.96716e+07	5.15948e+07	5.36381e+07
Ecuador	Changes in inventories	6.37434e+07	7.68289e+08	8.92411e+08	5.82423e+06	1.07183e+08	504100000	7.79143e+08	8.58248e+08	1.65052e+09	1.13416e+09	1.28055e+09	1.11007e+09	2.67896e+08	4.4003e+08
Egypt	Changes in inventories	1.58313e+09	1.14942e+09	1.11176e+09	1.39539e+09	1.30397e+09	6.16751e+08	5.9021e+08	7.30472e+08	2.21355e+08	6.4193e+08	7.74743e+08	2.10287e+09	4.86981e+09	2.63782e+09
El Salvador	Changes in inventories	-2.52402e+06	8.43023e+07	-6.56245e+07	6.62976e+07	9.20426e+07	138173313	1.34705e+08
Fiji	Changes in inventories	1.24455e+08	8.92954e+07	8.20143e+07	7.99798e+07	8.099e+07	9.34377e+07	9.74952e+07	6.65016e+07	7.84635e+07	1.21561e+08	8.70423e+07	1.00133e+08	1.05783e+08	1.03784e+08
Finland	Changes in inventories	1.14223e+09	3.17703e+08	7.14589e+08	6.61643e+08	1.09223e+09	3.35895e+09	2.63294e+09	2.95732e+09	1.82301e+09	-2.75529e+09	-7.15042e+07	3.20993e+09	8.73512e+08	8.20472e+08
France	Changes in inventories	1.69832e+10	1.0994e+10	6.51011e+09	1.85615e+08	1.30776e+10	1.31996e+10	1.45488e+10	1.80993e+10	1.32723e+10	-9.97189e+09	-4.66286e+09	1.7125e+10	4.68852e+09	1.0741e+09
French Polynesia	Changes in inventories	3.28505e+07	3.43137e+07	2.72288e+07	2.31966e+07	5.04537e+07	4.74275e+07	5.60668e+06	1.53089e+07	2.04988e+07	-2.10824e+07	1.0991e+08	9.1208e+07	6.02672e+07	8.72727e+07
Gabon	Changes in inventories	2.02278e+07	2.23983e+07	5.61995e+07	1.19932e+07	2.6136e+06	3.66904e+07	7.14204e+07	1.262e+08	6.58649e+07	1.40957e+07	-1.73569e+08	-3.25442e+07		3.33539e+07
Georgia	Changes in inventories	5.1045e+07	1.45905e+08	1.99846e+08	2.57254e+08	2.60477e+08	3.47602e+08	3.71786e+08	4.9928e+08	3.60478e+08	-1.77872e+08	1.8618e+08	3.24218e+08	3.86558e+08	2.74224e+08
Germany	Changes in inventories	4.50011e+10	3.42781e+10	8.03789e+09	2.45586e+10	1.11935e+09	-9.6416e+09	2.69954e+09	2.82073e+10	2.39654e+10	-4.76704e+10	6.1595e+09	7.81828e+09	-5.32849e+10	-4.49187e+10
Greece	Changes in inventories	1.7082e+09	1.86129e+09	2.52562e+09	5.15607e+09	2.10914e+09	5.31015e+08	5.71196e+09	2.17318e+09	1.7485e+09	-8.3301e+09	-1.71305e+09	-1.25168e+09	1.96799e+09	-3.52062e+08
Greenland	Changes in inventories				-8.67113e+06	-1.36737e+07	-1.25064e+07	833763	-2.23448e+07	1.56747e+07	-833763	1.66753e+06	-4.4056e+07	-4.34724e+07	-5.07088e+08
Guatemala	Changes in inventories	1.16685e+08	3.14131e+08	3.12509e+08	4.11485e+08	6.35237e+08	3.90324e+08	2.29346e+08	3.84249e+08	-4.14452e+08	-5.89228e+08	-1.978e+08	2.14969e+08	1.30438e+08	-2.41465e+07
Guinea	Changes in inventories						1.597e+07	1.44834e+07	-4.81975e+07	-3.72633e+07	-3.68011e+07	-4.04818e+07
Guinea-Bissau	Changes in inventories	333528	-3.76501e+07	-2.4196e+06	578234	593401	2.12335e+06	-3.76136e+06	3.34238e+06	-1.48445e+06	676818	693881	330338	201857	103522
Honduras	Changes in inventories	2.31987e+08	2.01745e+08	2.78214e+08	2.3941e+08	2.5928e+08	2.64188e+08	1.13892e+08	1.5107e+08	2.67394e+08	-2.16947e+08	4.04127e+07	2.46278e+08	2.27302e+08	-6.76356e+07
Hungary	Changes in inventories	3.93733e+09	2.24963e+09	1.47315e+09	1.43286e+09	3.281e+09	1.65782e+09	2.1704e+09	9.25332e+08	7.54224e+08	-3.85856e+09	-1.78292e+08	-3.59435e+08	-1.12602e+09	-1.69909e+09
India	Changes in inventories	8.07498e+09	3.32106e+09	9.77013e+09	1.00587e+10	1.86899e+10	2.3671e+10	3.11434e+10	4.09035e+10	1.98885e+10	3.33577e+10	4.32581e+10	2.73087e+10	2.48593e+10	2.52655e+10
Indonesia	Changes in inventories	4.09135e+09	5.1441e+09	1.6085e+09	5.65424e+09	3.08536e+09	4.11908e+09	3.56817e+09	-2.98786e+07	2.66805e+08	-2.5387e+08	-7.42946e+07	1.11046e+09	6.19201e+09	6.60949e+09
Iran (Islamic Republic of)	Changes in inventories	-8.25894e+09	-5.66881e+09	-1.3837e+09	-3.6641e+09	1.1902e+09	9.10256e+09	7.77068e+09	-3.37222e+08	-3.10047e+09	-1.00242e+10	-1.47452e+10	-6.10221e+09	-1.53433e+10	-1.06377e+10
Iraq	Changes in inventories	1.15094e+10	1.63447e+10	5.21023e+09	0	5.61176e+09	4.15027e+09	5.81853e+08	1.24181e+09	2.00333e+08	5.30867e+08	-1.88777e+08	1.57847e+09	-8.0246e+08	-8.54936e+08
Ireland	Changes in inventories	1.3241e+09	5.1216e+08	7.36038e+08	1.39311e+09	4.95292e+08	9.83684e+08	1.98807e+09	1.18839e+09	-2.5148e+08	-1.12782e+09	-4.42389e+08	5.99564e+08	2.20811e+08	6.60134e+08
Israel	Changes in inventories	4.9534e+08	4.79072e+08	-9.00244e+08	-9.72329e+08	-3.58896e+08	2.45401e+09	1.0517e+09	1.04746e+09	8.15079e+07	-1.32183e+09	-8.4171e+08	-1.12512e+09	1.09635e+08	-1.66289e+08
Italy	Changes in inventories	1.26175e+09	5.30767e+08	1.26859e+09	3.6936e+09	3.59561e+09	-3.23708e+09	4.99851e+09	8.96458e+09	7.54141e+09	-1.47903e+10	5.69405e+09	9.08683e+09	-5.83893e+09	-5.22969e+09
Jamaica	Changes in inventories	2.68774e+07	1.50531e+07	1.74516e+07	1.80942e+07	1.03469e+07	1.86894e+07	4.12711e+07	4.83818e+07	4.43449e+07	2.09561e+07	3.31823e+07	5.03934e+07	2.63847e+07	3.78395e+07
Japan	Changes in inventories	-4.10368e+09	8.69185e+08	-1.8976e+10	-4.07555e+09	1.7547e+10	5.75858e+09	2.76724e+08	1.50855e+10	2.62879e+10	-4.70911e+10	-6.99521e+09	-1.80161e+10	-1.39932e+10	-2.75816e+10
Jordan	Changes in inventories	1.28552e+08	1.76564e+08	1.29976e+08	2.46461e+07	3.07517e+08	4.43173e+08	3.96259e+08	4.1112e+08	3.56209e+08	2.17414e+08	1.8595e+08	1.64894e+08	1.61084e+08	1.80351e+08
Kazakhstan	Changes in inventories	1.96402e+08	1.03592e+09	1.20889e+09	1.17886e+09	8.09005e+08	1.71666e+09	2.22437e+09	3.87323e+09	9.47553e+08	1.45822e+09	1.21624e+09	1.6056e+09	2.19644e+09	2.56684e+09
Kenya	Changes in inventories	1.50792e+08	1.59475e+08	-4.63152e+08	1.88504e+08	2.138e+08	-3.17461e+08	-1.96775e+08	1.3395e+08	2.29149e+08	3.29987e+08	1.67604e+08	3.4898e+08	1.24871e+08	-1.33128e+08
Kiribati	Changes in inventories	271699	262649	281555	271902	272372	324259	282864	284057	287744	288730	272651	283154	319950	306984
Kosovo	Changes in inventories					1.45221e+08	1.60921e+08	1.64279e+08	1.60448e+08	1.55374e+08	1.44025e+08	1.5764e+08	1.66741e+08	1.56554e+08	1.71225e+08
Kuwait	Changes in inventories	8.08245e+07	2.61803e+08	4.85134e+08	1.73211e+08	2.01001e+09	1.45548e+09	-3.27446e+08	2.66763e+09	-1.01948e+09	4.1439e+07
Kyrgyzstan	Changes in inventories	-5.10346e+07	-2.75996e+07	-3.03161e+07	7.75478e+07	1.95705e+07	5.0839e+06	-1.13488e+07	-4.72789e+07	-5.81057e+07	8.13509e+07	5.38228e+07	-5.61467e+07	-1.40148e+08	-1.66725e+08
Lao People's DR	Changes in inventories	-3.04715e+07	-3.26849e+07	-4.30769e+07	-1.02361e+08	-1.05658e+08	5.58317e+07	7.11187e+07	9.6396e+07	9.797e+07	9.92689e+07	8.6525e+07	1.01676e+08	1.32499e+08	1.23469e+08
Latvia	Changes in inventories	-1.1556e+07	1.41137e+08	3.74105e+08	8.23169e+08	8.95356e+08	5.9675e+08	9.15848e+08	9.23398e+08	4.9968e+08	-9.86879e+07	4.0754e+07	5.33115e+08	1.52847e+08	2.32968e+08
Lebanon	Changes in inventories	2.05447e+07	2.45398e+08	-3.60859e+07	-2.78051e+07	1.56509e+08	2.10282e+08	-2.28112e+08	-2.46225e+07	9.14146e+07	-2.07735e+08	-1.6132e+07	1.95282e+08	-1.75471e+07	2.32074e+07
Lesotho	Changes in inventories	3.68754e+06	7.33653e+06	-1.31909e+07	-2.19519e+07	2.3193e+06	1.17829e+07	-1.02818e+07	3.46909e+07	-4.22365e+06	5.86156e+06	5.87639e+07	-6.38433e+07	-7.31952e+07	-6.75434e+07
Liechtenstein	Changes in inventories	7.94471e+06	3.89812e+07	2.8216e+07	4.22313e+07	-4.40972e+07	-1.56438e+07	4.24351e+07	-3.97532e+07	2.45644e+07	1.34235e+08	5.01579e+07	1.21311e+08	-9.25447e+06	-1.0265e+08
Lithuania	Changes in inventories	6.14518e+08	5.60182e+08	3.35279e+08	2.80242e+08	-2.52891e+08	2.05083e+08	7.63983e+08	3.10846e+08	-5.33841e+08	1.39251e+09	-4.77553e+08	-3.33421e+08	5.4535e+08	1.12457e+09
Luxembourg	Changes in inventories	5.54644e+08	5.08133e+08	-2.67373e+07	3.3204e+07	2.06934e+08	-3.09655e+07	2.64513e+08	7.34343e+08	2.02209e+08	-3.89618e+08	7.79983e+08	1.0573e+09	4.02054e+08	3.02567e+08
Malawi	Changes in inventories	1.94647e+08	1.98385e+08	1.60588e+08	1.92211e+08	1.34757e+08	1.87325e+08	3.01991e+08	1.93001e+08	-1.85371e+08	1.14709e+08	-2.96855e+08	-1.92678e+08	-2.31145e+08	-2.61322e+08
Malaysia	Changes in inventories	2.93244e+09	5.49456e+08	2.68002e+09	1.39246e+09	2.46152e+09	1.33348e+08	8.85376e+08	5.23621e+08	3.1581e+08	-2.29252e+09	2.14644e+09	5.6084e+08	1.75308e+09	1.32978e+09
Mali	Changes in inventories	-1.44732e+09	5.99875e+08	-6.60071e+08	1.48524e+09	-1.23665e+09	3.60916e+08	7.77374e+08	1.87935e+08	8.64388e+08	3.5691e+08	1.16838e+09	3.88517e+08	2.44226e+09	-8.30444e+08
Malta	Changes in inventories	3.60161e+08	-1.46453e+08	-5.79489e+07	-1.4575e+08	-1.29595e+08	-5.1276e+07	-5.1276e+07	-1.50667e+08	2.16869e+08	2.81843e+08	2.57434e+08	3.00632e+08	-2.82721e+07	9.58791e+07
Mauritania	Changes in inventories	6.00367e+07	8.61991e+07	-4.15093e+07	4.69749e+07	5.25177e+07	5.48529e+07	8.94375e+07	1.89728e+08	2.95768e+08	2.67249e+08	2.60872e+08	1.85206e+08	3.38102e+08	3.45541e+08
Mauritius	Changes in inventories	7.5917e+08	-5.46945e+07	5.08694e+08	3.1998e+08	6.57101e+08	7.70946e+07	2.77681e+08	4.87187e+08	4.74243e+08	-3.01263e+08	-3.28617e+08	-3.12319e+07	-1.78693e+07	4.39815e+08
Mexico	Changes in inventories	1.72912e+10	1.99648e+10	1.88819e+10	1.05817e+10	1.32252e+10	8.78931e+09	1.43126e+10	1.01001e+10	1.34286e+10	2.26463e+09	9.16713e+09	4.35903e+09	7.227e+09	5.78146e+09
Micronesia (FS of)	Changes in inventories	4.6692e+06	4.83005e+06	4.74267e+06	4.9189e+06	4.92958e+06	4938096	4.93357e+06	4.67404e+06	4.79634e+06	4.92147e+06	4.88702e+06	4.96615e+06	4.81539e+06	5.03455e+06
Monaco	Changes in inventories	3.48419e+07	2.29843e+07	1.19944e+07	4.30185e+06	1.96342e+07	2.51748e+07	3.2465e+07	4.71395e+07	2.49194e+07	-3.42845e+07	-8.89217e+06	3.75461e+07	1.01781e+07	-6.13385e+06
Mongolia	Changes in inventories	1.44971e+08	1.33473e+08	1.10078e+08	1.42319e+08	1.5853e+08	2.42018e+08	7.87308e+07	1.21859e+08	2.40399e+08	1.68455e+08	2.60055e+08	4.94281e+08	4.7456e+08	7.29192e+08
Montenegro	Changes in inventories	1.22992e+07	3.70827e+07	1.88474e+07	5.03273e+06	5.39917e+06	-5.71308e+06	5.734e+06	-1.35607e+07	-2.77575e+07	-4.99517e+06	-1.90414e+07	2.75886e+06	-1.0379e+07	1.10818e+06
Morocco	Changes in inventories	-1.63361e+08	5.02416e+08	3.90323e+08	1.38136e+09	1.64617e+09	7.55668e+08	7.14192e+08	6.65237e+08	9.31209e+08	1.23272e+09	1.07702e+09	1.24198e+09	8.8021e+08	8.34021e+08
Mozambique	Changes in inventories			-2.91332e+08	3.02831e+08	-5.24757e+08	2.4972e+08	-8.63363e+08	-1.17984e+09	1.17038e+09	-7.39309e+08	7.41716e+08	-5.80507e+08	-1.40079e+09	-5.50866e+08
Myanmar	Changes in inventories	3.68703e+07	-2.01159e+06	2.46689e+07	2.23089e+06	4.18019e+07	5.53876e+07	2.11929e+07	4.50733e+07	-1.20334e+07	-1.84542e+07	5.79069e+07	1.34318e+07	1.68648e+08	1.8156e+08
Namibia	Changes in inventories	6.37335e+07	7.93653e+07	1.17936e+08	9.0187e+07	8.80653e+07	7.82706e+07	1.21786e+08	1.28704e+08	5.16471e+07	9.94572e+07	1.22779e+08	1.21448e+08	7.01973e+07	1.86751e+08
Nauru	Changes in inventories	92363.4	87410.7	84112.2	78169.9	76232.8	65715.7	53781.3	61223	106135	85327.2	103947	118269	136501	177582
Nepal	Changes in inventories	4.23882e+08	3.0304e+08	-1.1992e+06	4.86003e+07	3.29191e+08	5.37612e+08	4.28724e+08	4.4451e+08	1.22347e+09	1.52071e+09	2.46976e+09	2.50373e+09	2.63318e+09	3.53692e+09
Netherlands	Changes in inventories	9.77523e+08	2.71864e+09	-3.77548e+08	4.69329e+08	2.09226e+09	2.15515e+09	2.83728e+09	3.05687e+09	1.37977e+09	-1.47677e+09	5.12081e+09	2.60023e+09	3.11998e+09	1.29558e+09
Netherlands Antilles (former)	Changes in inventories	-1.01183e+08	1.89245e+08	-2.87458e+07	-1.83811e+07	-8.57519e+07	-2.96395e+06	-2.81058e+06	-6.0492e+07	4.24246e+07	-7.40284e+06	-8.8569e+06	8.67629e+06	-2.53624e+06
New Caledonia	Changes in inventories	5.85055e+07	-8.38365e+06	-1.21105e+07	3.30151e+07	8.81318e+07	8.73829e+07	-6.79933e+07	1.02041e+08	441550	-2.42029e+08	-7.12121e+07	-8.82109e+07	-3.21037e+07	-6.73135e+07
New Zealand	Changes in inventories	8.30514e+08	8.90263e+08	7.93917e+08	9.3134e+08	1.2271e+09	7.74499e+08	-2.25553e+08	8.77566e+08	4.39156e+08	-6.35582e+08	3.29367e+08	8.813e+08	2.72606e+08	6.83381e+08
Nicaragua	Changes in inventories	-1.86167e+08	-1.35764e+08	-1.17043e+08	-9.88806e+07	-1.50831e+08	-1.83362e+08	-1.58042e+08	-2.76917e+08	-3.54231e+08	-1.35025e+08	-7.71724e+07	-1.2038e+08	5.72751e+07	1.63892e+08
Niger	Changes in inventories	1.31764e+07	2.42927e+07	4.66332e+07	3.44833e+07	-1.81762e+07	4.88257e+07	3.4455e+07	2.87449e+06	3.5031e+07	-3.43278e+06	3.37642e+07	-7.0917e+06	1.56922e+07	-3.04763e+06
Nigeria	Changes in inventories	-4.6139e+06	-1.3796e+08	-1.64321e+08	-2.40993e+08	1.40533e+08	2.68002e+08	2.15237e+08	-8.2407e+06	-8.20811e+06	-1.09535e+07	-1.30176e+07	-1.09103e+07	-1.44385e+07	-1.38139e+07
Norway	Changes in inventories	6.51678e+09	4.90701e+09	4.88194e+09	4.06984e+09	6.66908e+09	6.94932e+09	8.98026e+09	9.50589e+09	9.38154e+09	5.24806e+09	9.2749e+09	8.68177e+09	8.05787e+09	8.93922e+09
Oman	Changes in inventories	3.83057e+06	5.28076e+06	8.66706e+06	-1.53927e+07	1.88515e+07	-1.83282e+08	3.2702e+07	6.84181e+07	5.46584e+07	-3.93677e+07	-3.32943e+07	-1.22632e+08	4.3096e+07	1.97592e+06
Pakistan	Changes in inventories	1.19221e+09	1.21772e+09	1.23279e+09	1.67289e+09	1.74798e+09	1.86811e+09	1.93847e+09	2.03215e+09	2.06672e+09	2.12525e+09	2.1594e+09	2.21956e+09	2.30868e+09	2.44881e+09
Palau	Changes in inventories	22453.6	8.70056e+06	5.40179e+06	4.58156e+06	3.85409e+06	5483460	4.79308e+06	8.90417e+06	7.81405e+06	4.26696e+06	-1.1001e+07	-1.84761e+06	-3.11565e+06	-5.6127e+06
Panama	Changes in inventories	3.61242e+08	3.13548e+08	3.0052e+08	2.79433e+08	3.17964e+08	237700000	1.8857e+08	1.97844e+08	1.97071e+08	2.10099e+08	2.13411e+08	2.42116e+08	2.76121e+08	2.22575e+08
Papua New Guinea	Changes in inventories	5.6694e+07	7.02559e+07	1.80217e+08	1.81096e+08	1.90412e+08	4.83567e+07	1.10196e+08	1.10194e+08	1.10193e+08	1.10184e+08	1.10175e+08	1.10165e+08	1.10161e+08	1.10161e+08
Paraguay	Changes in inventories	2.05996e+07	6.50504e+07	8.62329e+07	9.02464e+07	8.52705e+07	3.54282e+07	4.96788e+07	3.04213e+07	4.54648e+07	1.8586e+07	2.6388e+07	2.8367e+07	2.69487e+07	2.69487e+07
Peru	Changes in inventories			-8.55828e+07	-7.97879e+07	6.12762e+07	1.68697e+08	-1.43425e+08	-3.51131e+08	-5.68281e+08	1.82434e+08	-3.09922e+08	-3.60414e+08	-2.26593e+08	-6.00743e+08
Philippines	Changes in inventories	-3.41585e+09	7.36832e+08	3.15045e+09	1.81513e+09	9.03187e+08	1.05125e+09	-3.36398e+09	-4.59714e+09	-1.0205e+09	-2.57717e+09	-4.64077e+08	6.1424e+08	-3.11412e+09	1.36813e+09
Poland	Changes in inventories	3.14131e+09	6.84058e+08	1.78172e+08	1.91064e+09	6.46196e+09	2.95783e+09	5.37784e+09	9.44071e+09	5.08557e+09	-4.3405e+09	3.23032e+09	5.87973e+09	3.28431e+09	-7.1917e+08
Portugal	Changes in inventories	7.09173e+08	1.00408e+09	9.75944e+07	-2.49526e+08	1.25312e+09	9.30085e+08	1.25572e+09	1.11352e+09	1.26603e+09	-7.12738e+08	8.41354e+08	1.99331e+08	4.16101e+08	3.31705e+08
Puerto Rico	Changes in inventories	4.91302e+08	2.04007e+08	2.12979e+08	3.34277e+08	3.46391e+08	377800000	2.42743e+08	3.30238e+08	2.90305e+08	1.79477e+08	1.05443e+08	3.14534e+08	5.83302e+07	1.57686e+08
Qatar	Changes in inventories	-6.21979e+08	-1.95985e+09	-1.54861e+09	-2.28485e+09	-5.50032e+08	1.02267e+09	-8.31636e+09
Republic of Korea	Changes in inventories	5.53092e+09	4.84088e+09	6.05839e+09	7.41011e+09	1.03004e+10	1.16942e+10	1.62889e+10	1.57174e+10	1.52151e+10	-1.75213e+10	1.62863e+10	2.52294e+10	1.88611e+10	5.33688e+09
Republic of Moldova	Changes in inventories	1.82852e+08	1.42251e+08	1.21112e+08	1.11711e+08	1.37373e+08	1.86395e+08	1.40651e+08	1.39606e+08	2.02076e+08	3.04924e+07	4.37984e+07	5.05665e+07	-169640	9.03592e+07
Romania	Changes in inventories	5.06318e+08	1.75814e+09	7.38319e+08	4.18924e+08	2.0463e+09	-4.25583e+08	9.21957e+08	-5.72506e+09	-9.01906e+09	1.7482e+09	2.07683e+09	1.54125e+09	-1.12347e+09	-1.83866e+09
Russian Federation	Changes in inventories	1.04353e+10	1.6611e+10	1.20054e+10	1.39638e+10	1.52925e+10	1.5563e+10	1.79693e+10	2.33241e+10	2.54529e+10	-3.20234e+10	-6.98692e+09	1.0573e+10	1.87413e+09	-9.25471e+09
Rwanda	Changes in inventories	1.10553e+07	8.30848e+06	8.91604e+06	9.82899e+06	1.12352e+07	1.29609e+07	1.52368e+07	1.90982e+07	2.52297e+07	2.58774e+07	2.77661e+07	3.11166e+07	4.42813e+07	5.1462e+07
San Marino	Changes in inventories	8.40072e+07	3.38432e+07	-8.10014e+06	2.32094e+07	3.30629e+07	3.74057e+07	3.17143e+07	6.72746e+07	2.47107e+07	-4.43374e+07	-2.2819e+07	-2.64842e+07	-3.44058e+07	-2.48314e+07
Sao Tome and Principe	Changes in inventories	-5.50286e+06	-5.72645e+06	-5.75365e+06	-6.08403e+06	-6.28547e+06	-6.16378e+06	-6.86181e+06	-6.87257e+06	-7.14125e+06	-7.45354e+06
Saudi Arabia	Changes in inventories	6.80704e+09	1.73829e+09	1.0602e+10	8.56106e+09	2.30606e+09	2.83294e+09	9.88641e+09	2.39841e+10	3.77254e+10	3.44154e+10	4.13595e+10	4.58958e+10	3.59003e+10	3.54312e+10
Senegal	Changes in inventories	1.85931e+08	2.21225e+08	4.98271e+08	2.12082e+08	3.73242e+08	1.0168e+08	4.39153e+08	9.79879e+07	4.49905e+08	7.27324e+08	8.79296e+08	1.0103e+09	6.38322e+08	6.10811e+08
Sierra Leone	Changes in inventories	4.22839e+06	5.30655e+06	8.5157e+06	5.31675e+06	6.01767e+06	6.833e+06	7.21117e+06	7.20959e+06	7.26225e+06	7.04698e+06	7.96163e+06	9.30659e+06	4.9236e+07	9.788e+06
Singapore	Changes in inventories	3.1168e+09	-2.89913e+09	-1.41559e+09	-7.20976e+09	-1.25955e+09	-1.45158e+09	-7.8593e+08	-1.08123e+09	4.19233e+09	-2.94936e+09	-9.29345e+08	2.35262e+09	7.21691e+09	7.07373e+09
Slovakia	Changes in inventories	2.4535e+08	5.92986e+08	7.05299e+08	-1.36571e+07	1.09448e+09	1.13994e+09	8.3251e+08	9.90283e+08	1.70771e+09	-4.62622e+08	9.49312e+08	3.23377e+08	-4.57561e+08	-9.36896e+07
Slovenia	Changes in inventories	3.23089e+08	1.36557e+07	2.02512e+08	4.14176e+08	8.5668e+08	6.2613e+08	8.76873e+08	1.59816e+09	1.23425e+09	-3.64347e+08	3.34856e+08	5.52767e+08	-1.11135e+08	-8.73096e+07
Somalia	Changes in inventories	1.47749e+06	1.52128e+06	1.57464e+06			1.50807e+06	1.54888e+06	1.02017e+06	1.46605e+06	1.43203e+06	1.38407e+06	1.50441e+06	1.51572e+06	1.54455e+06
South Africa	Changes in inventories	1.09636e+09	3.73172e+08	2.11422e+09	2.74996e+09	4.30705e+09	2.75438e+09	3.38728e+09	1.0811e+09	-1.14298e+09	-2.18126e+09	7.14246e+08	2.77248e+09	3.85411e+09	1.98899e+08
South Sudan	Changes in inventories									1.69897e+07	-1.52907e+08	3.55597e+06	1.97554e+06	3.16087e+06	3.16087e+06
Spain	Changes in inventories	3.47903e+09	2.89754e+09	2.4889e+09	1.69221e+09	2.26725e+09	1.43511e+09	2.58527e+09	3.08541e+09	3.97299e+09	2.45353e+09	4.91749e+09	4.47455e+09	3.71588e+09	3.64338e+09
Sri Lanka	Changes in inventories	1.03461e+09	8.67548e+08	8.62637e+08	9.08734e+08	6.6299e+08	6.7469e+08	8.20179e+08	7.54969e+08	6.45684e+08	7.61735e+08	1.59976e+09	6.90055e+08	3.63925e+07
State of Palestine	Changes in inventories	3.62916e+07	2.02534e+07	2.88893e+07	3.52635e+07	4.10208e+07	18300000	3.46466e+07	2.67303e+07	4.66753e+07	2.76556e+07	7.12466e+07	-2.34404e+08	-1.82794e+08	-2.00992e+08
Sudan (Former)	Changes in inventories	5.35175e+08	1.51212e+09	9.09239e+08	1.36098e+09	1.18582e+09	1.43322e+09	1.32662e+09	1.42447e+09	1.47581e+09	1.53014e+09	1.69973e+09
Sweden	Changes in inventories	3.21914e+09	1.11901e+09	-8.30373e+07	1.32815e+09	-5.35524e+08	-6.25444e+08	8.5524e+08	5.9123e+09	1.91674e+09	-1.02926e+10	5.1532e+09	9.09192e+09	-9.41386e+07	3.78997e+08
Switzerland	Changes in inventories	-3.81764e+09	-3.019e+09	-3.45498e+09	-2.77551e+09	-4.64855e+09	-2.96849e+09	-2.76882e+09	-4.41345e+09	-3.17336e+09	-6.41299e+08	-2.64725e+09	-9.24446e+08	-4.13351e+09	-6.3474e+09
Syrian Arab Republic	Changes in inventories					-4.20028e+07	-1.30913e+09	1.94748e+09	-3.60567e+08	-2.95015e+09	-1.32116e+09	1.89466e+08	1.8473e+08	1.34853e+08	9.84425e+07
Tajikistan	Changes in inventories	1.40887e+07	3.09209e+06	3.46906e+07	2.32761e+07	2.50712e+07	1.2225e+07	1.29473e+07	1.42525e+07	1.64538e+07	-8.38314e+06	-4.1694e+06	4.31886e+06	1.04221e+07	1.08838e+07
TFYR of Macedonia	Changes in inventories						4.21945e+07
Thailand	Changes in inventories	1.00624e+09	9.32142e+08	1.30965e+09	1.35074e+09	1.47775e+09	5.12696e+09	3.93157e+08	1.59406e+08	3.88416e+09	-4.74675e+09	3.71529e+09	2.3765e+09	4.3316e+09	8.98058e+09
Timor-Leste	Changes in inventories	-6.31635e+06	-7.74717e+06	1.79818e+06	2.8256e+06	1.76705e+06	602502	706781	729010	751936	775583	788710	782750	1.80959e+07	6.87294e+06
Togo	Changes in inventories	1.19651e+07	2.05779e+07	2.31054e+07	-4.31936e+07	-2.16875e+07	9.97011e+06		-1.23102e+06	7.92805e+06	-5.68107e+06	1.23632e+06	9.96924e+06	-1.31186e+08	-1.16595e+08
Tonga	Changes in inventories	1.17478e+06	779465	948778	870816	839923	874919	839923	839923	874919	909916	1.22489e+06	1.94582e+07	944913	909916
Trinidad and Tobago	Changes in inventories	1.12926e+08	3.24955e+07	7.97127e+07	1.22442e+08	1.59246e+08	2.43985e+08	8.40214e+07	1.82944e+08	2.7289e+08
Tunisia	Changes in inventories	8.91851e+07	9.09667e+07	5.49856e+07	1.24207e+08	1.55526e+08	7.40539e+07	1.31808e+08	1.23413e+08	1.75421e+08	9.45701e+07	1.56967e+08	6.36438e+07	5.06704e+07	4.85346e+07
Turkey	Changes in inventories	2.78093e+09	-2.90031e+09	7.70537e+09	5.38189e+09	-5.41956e+09	-5.02861e+09	-5.63918e+09	-1.00282e+09	1.60318e+09	-1.57983e+10	2.07663e+09	1.56105e+08	-1.25384e+10	1.31156e+09
U.R. of Tanzania: Mainland	Changes in inventories	1.52061e+08	1.62396e+08	1.7063e+08	1.85163e+08	1.97734e+08	2.16145e+08	2.44392e+08	2.67551e+08	-2.83633e+08	-8.8087e+08	-3.16528e+08	2.04683e+08	-4.53959e+08	-1.10383e+08
Uganda	Changes in inventories	3.24964e+07	3.53334e+07	3.65085e+07	5.43818e+07	2.29906e+07	3.93887e+07	4.60984e+07	4.94428e+07	4.90158e+07	4.90158e+07	4.79018e+07	5.16151e+07	6.08984e+07	7.16671e+07
Ukraine	Changes in inventories	1.37814e+08	8.19011e+08	5.15707e+08	7.47515e+08	-3.3401e+08	5.33882e+08	3.75142e+08	6.86892e+08	1.11158e+09	-4.83115e+08	1.42216e+08	8.85004e+08	1.00974e+08	3.93281e+08
United Arab Emirates	Changes in inventories	8.34381e+08	8.68699e+08	8.86426e+08	8.76798e+08	9.61753e+08	1.55861e+09	1.78234e+09	1.8178e+09	3.41917e+09	2.71402e+09	2.49478e+09	2.44732e+09	1.69115e+09	1.97697e+09
United Kingdom	Changes in inventories	4.88447e+09	-2.81305e+09	4.42198e+09	2.02919e+08	3.59692e+09	6.44911e+09	1.4709e+09	-1.41219e+09	5.52722e+09	1.96357e+10	-5.72808e+09	-2.83365e+09	-3.70507e+09	-9.291e+09
United States	Changes in inventories	5.74785e+10	-4.65072e+10	1.66415e+10	1.86957e+10	6.51745e+10	59580000000	6.52786e+10	3.36427e+10	-3.42486e+10	-1.39692e+11	6.029e+10	4.09506e+10	6.35842e+10	7.20375e+10
Uruguay	Changes in inventories	6.96465e+07	1.53773e+08	1.45357e+08	3.78713e+08	3.98999e+08	1.99889e+08	1.7293e+08	1.23414e+08	3.57494e+08	2.03307e+08	2.19563e+07	3.05744e+08	2.30562e+08	1.23595e+08
Uzbekistan	Changes in inventories	-4.85382e+08	-6.29045e+08	-3.59246e+07	6.24009e+07	9.42295e+07	2.87958e+08	1.66955e+08
Vanuatu	Changes in inventories	1.91187e+06	3.44184e+06	3.43299e+06	1.74371e+06	2.61105e+06	2.78271e+06	3.96627e+06	4.39994e+06	5.98103e+06	5.94489e+06	5.25825e+06	4.84265e+06	4.64388e+06	5.15572e+06
Venezuela	Changes in inventories	3.34178e+09	3.75791e+09	-7.78973e+08	-2.42423e+08	3.99424e+09	3.93511e+09	6.91288e+09	9.59058e+09	9.71459e+09	3.89338e+09	6.41865e+09	1.08297e+10	1.36846e+10	9.76675e+09
Viet Nam	Changes in inventories	6.97273e+08	7.77804e+08	8.59745e+08	9.56212e+08	1.07242e+09	1.4315e+09	1.96352e+09	3.03477e+09	3.85038e+09	2.84228e+09	2.99698e+09	3.10487e+09	3.32676e+09	3.55364e+09
Yemen	Changes in inventories	2.32408e+08	7.99775e+08	7.62187e+08	7.7152e+08	1.10027e+09	1.61218e+09	1.36023e+09	1.09638e+09	8.41468e+08	5.48753e+08	6.62611e+08	1.41505e+09	9.60987e+08
Yemen Arab Republic (Former)	Changes in inventories
Yugoslavia (Former)	Changes in inventories
Zambia	Changes in inventories	7.97081e+07	9.05209e+07	8.71244e+07	8.58688e+07	8.41427e+07	9.18653e+07	8.68288e+07	8.8028e+07	1.01698e+08	1.03627e+08	1.11503e+08	1.20897e+08	1.28483e+08	1.37054e+08
Zanzibar	Changes in inventories	-999311	1.19777e+06	4.55582e+06	-4.93128e+06	-310001	1.62188e+06	1.55494e+06	2.76871e+06	2.08071e+06	1.61315e+06	1.58853e+06	1.12085e+07	-1.21923e+06	3.27441e+06
Zimbabwe	Changes in inventories	-1.00808e+08	-1.19989e+06	2.0273e+08	1.51591e+08	-2.63285e+07	-29575425	-3.07206e+07	-1.0943e+07	-9.10426e+06	-3.18818e+07	-2.5345e+07	-4.36e+07	4.14965e+07	-569776
Afghanistan	Construction (ISIC F)	1.9574e+08	1.93735e+08	2.16559e+08	2.94769e+08	4.60375e+08	6.08854e+08	7.91511e+08	8.70667e+08	9.57689e+08	1.02218e+09	1.10062e+09	1.24683e+09	1.35724e+09	1.46535e+09
Albania	Construction (ISIC F)	5.24401e+08	6.96134e+08	8.45614e+08	1.04057e+09	1.11383e+09	1.1838e+09	1.30859e+09	1.46766e+09	1.62723e+09	1.62556e+09	1.50644e+09	1.55714e+09	1.33502e+09	1.36539e+09
Algeria	Construction (ISIC F)	4.75552e+09	5.01708e+09	5.54889e+09	5.87627e+09	6.28761e+09	6.89751e+09	7.7597e+09	8.40375e+09	9.20211e+09	1.00395e+10	1.10033e+10	1.15755e+10	1.2571e+10	1.34383e+10
Andorra	Construction (ISIC F)	2.442e+08	2.69167e+08	2.95844e+08	3.09308e+08	3.42942e+08	3.79819e+08	4.02494e+08	3.86691e+08	3.61675e+08	3.4732e+08	3.26597e+08	3.12439e+08	3.06609e+08	3.06135e+08
Angola	Construction (ISIC F)	6.65095e+08	7.0794e+08	7.71853e+08	7.97324e+08	8.84233e+08	1.02571e+09	1.33342e+09	1.82812e+09	2.29612e+09	2.84214e+09	3.2983e+09	3.69476e+09	3.88644e+09	3.8133e+09
Anguilla	Construction (ISIC F)	1.48105e+07	1.33937e+07	1.0323e+07	1.15869e+07	1.64935e+07	2.16771e+07	2.69518e+07	4.41875e+07	4.78913e+07	1.98548e+07	1.51502e+07	1.24231e+07	1.3521e+07	1.40995e+07
Antigua and Barbuda	Construction (ISIC F)	8.37859e+07	5.92684e+07	6.32775e+07	6.95055e+07	7.38781e+07	9.43556e+07	1.37841e+08	1.47979e+08	1.48871e+08	1.35136e+08	8.79527e+07	6.65218e+07	7.31716e+07	8.14607e+07
Argentina	Construction (ISIC F)	8.49415e+09	7.50873e+09	5.00081e+09	6.71963e+09	8.69547e+09	1.01884e+10	1.17856e+10	1.29459e+10	1.31401e+10	1.26516e+10	1.34023e+10	1.46595e+10	1.42852e+10	1.45515e+10
Armenia	Construction (ISIC F)	3.02371e+08	3.16885e+08	4.48392e+08	6.52411e+08	7.52229e+08	9.61911e+08	1.32501e+09	1.56585e+09	1.74259e+09	1.01839e+09	1.05212e+09	9.24038e+08	9.68838e+08	8.64022e+08
Aruba	Construction (ISIC F)	1.32234e+08	1.14456e+08	1.10689e+08	1.27635e+08	1.42279e+08	1.48704e+08	1.7194e+08	1.76106e+08	1.45395e+08	1.08687e+08	9.5799e+07	1.13519e+08	1.05723e+08	1.09314e+08
Australia	Construction (ISIC F)	3.23061e+10	3.62691e+10	4.21951e+10	4.52182e+10	4.73948e+10	5.12534e+10	5.41462e+10	5.79592e+10	6.02535e+10	6.0562e+10	6.22272e+10	6.89036e+10	6.92685e+10	7.18029e+10
Austria	Construction (ISIC F)	1.88484e+10	1.82441e+10	1.82295e+10	1.93266e+10	1.96495e+10	1.97015e+10	1.93671e+10	1.99845e+10	1.97323e+10	1.78571e+10	1.71294e+10	1.69987e+10	1.65298e+10	1.65877e+10
Azerbaijan	Construction (ISIC F)	3.12113e+08	3.30435e+08	6.00367e+08	8.87435e+08	1.21501e+09	1.23924e+09	1.34448e+09	1.55983e+09	2.12117e+09	1.94728e+09	2.34255e+09	2.81113e+09	3.3181e+09	4.08009e+09
Bahamas	Construction (ISIC F)	4.74637e+08	3.74195e+08	4.34166e+08	4.79641e+08	3.98385e+08	529959112	6.38319e+08	4.16598e+08	5.3611e+08	4.81527e+08	5.99886e+08	6.60222e+08	7.48278e+08	7.40953e+08
Bahrain	Construction (ISIC F)	3.28398e+08	4.10004e+08	4.48282e+08	5.53178e+08	7.93878e+08	1.1286e+09	1.27858e+09	1.56766e+09	1.75994e+09	1.62851e+09	1.66729e+09	1.53592e+09	1.59874e+09	1.64205e+09
Bangladesh	Construction (ISIC F)	2.68511e+09	2.91732e+09	3.16863e+09	3.42502e+09	3.70772e+09	4.01568e+09	4.34957e+09	4.85786e+09	5.13365e+09	5.42609e+09	5.75222e+09	6.15219e+09	6.67049e+09	7.20697e+09
Barbados	Construction (ISIC F)	1.54813e+08	1.65387e+08	1.78077e+08	1.79346e+08	1.85691e+08	211700000	2.10847e+08	2.10847e+08	1.99974e+08	1.63519e+08	1.47955e+08	1.63519e+08	1.51367e+08	1.54211e+08
Belarus	Construction (ISIC F)	1.26117e+09	1.19375e+09	1.31758e+09	1.47338e+09	1.70055e+09	2.02042e+09	2.53177e+09	3.02311e+09	3.75237e+09	4.17568e+09	4.81632e+09	5.09799e+09	4.59178e+09	4.87122e+09
Belgium	Construction (ISIC F)	1.50135e+10	1.51361e+10	1.5018e+10	1.52676e+10	1.62832e+10	1.70134e+10	1.87012e+10	1.90286e+10	1.92426e+10	1.89509e+10	1.91355e+10	2.06435e+10	2.10266e+10	2.07506e+10
Belize	Construction (ISIC F)	4.73523e+07	4.79774e+07	4.97472e+07	4.08543e+07	4.27174e+07	4.11693e+07	4.03521e+07	3.91065e+07	4.51671e+07	4.06179e+07	3.05867e+07	2.97888e+07	3.42836e+07	3.57206e+07
Benin	Construction (ISIC F)	1.34077e+08	1.43329e+08	1.5094e+08	1.62184e+08	1.67794e+08	1.76124e+08	1.867e+08	2.00168e+08	2.16594e+08	2.23108e+08	2.23067e+08	2.36462e+08	2.4574e+08	2.541e+08
Bermuda	Construction (ISIC F)	2.92192e+08	2.53111e+08	2.32148e+08	2.47567e+08	2.66583e+08	324234521	3.10138e+08	3.08666e+08	3.22843e+08	2.85961e+08	2.428e+08	2.32196e+08	1.74443e+08	1.80624e+08
Bhutan	Construction (ISIC F)	8.28361e+07	1.03819e+08	1.29852e+08	1.33452e+08	1.44582e+08	1.41026e+08	1.27417e+08	1.33967e+08	1.20278e+08	1.40156e+08	1.69041e+08	1.93906e+08	2.29161e+08	2.24421e+08
Bolivia	Construction (ISIC F)	2.34497e+08	2.18114e+08	2.53393e+08	1.9342e+08	1.97634e+08	2.10191e+08	2.27529e+08	2.60174e+08	2.84112e+08	3.14854e+08	3.38336e+08	3.65469e+08	3.94789e+08	4.36809e+08
Bosnia and Herzegovina	Construction (ISIC F)	4.5981e+08	4.38516e+08	4.21931e+08	4.36724e+08	4.39404e+08	4.82304e+08	4.88894e+08	5.51692e+08	6.45098e+08	5.96236e+08	5.24405e+08	5.0044e+08	4.89302e+08	4.84354e+08
Botswana	Construction (ISIC F)	4.82407e+08	4.1202e+08	5.64305e+08	4.8445e+08	4.78905e+08	4.73118e+08	5.48376e+08	6.75698e+08	6.80974e+08	7.64954e+08	7.92484e+08	9.75242e+08	1.11603e+09	1.15841e+09
Brazil	Construction (ISIC F)	3.68764e+10	3.61076e+10	3.53288e+10	3.41689e+10	3.64172e+10	3.70639e+10	3.8799e+10	4.06913e+10	4.39144e+10	4.35878e+10	4.86657e+10	5.04293e+10	5.11381e+10	5.21342e+10
British Virgin Islands	Construction (ISIC F)	5.7656e+07	8.29728e+07	9.42287e+07	5.06652e+07	4.49606e+07	59905000	4.72107e+07	6.89293e+07	6.30319e+07	6.57314e+07	4.36472e+07	5.29093e+07	4.98032e+07	4.91301e+07
Brunei Darussalam	Construction (ISIC F)	1.67958e+08	1.98683e+08	2.17136e+08	2.23486e+08	2.32878e+08	2.51442e+08	2.42098e+08	2.68507e+08	2.73522e+08	2.62207e+08	2.68414e+08	2.77366e+08	2.88516e+08	3.03411e+08
Bulgaria	Construction (ISIC F)	1.18184e+09	1.2437e+09	1.27806e+09	1.30666e+09	1.37939e+09	1.51497e+09	1.73417e+09	1.96455e+09	2.30706e+09	2.29937e+09	1.88392e+09	1.84328e+09	1.80619e+09	1.79485e+09
Burkina Faso	Construction (ISIC F)	2.32151e+08	2.49241e+08	1.83086e+08	1.79764e+08	2.18468e+08	2.24342e+08	2.67363e+08	2.8685e+08	3.20909e+08	3.69391e+08	3.66544e+08	5.44018e+08	4.90135e+08	5.33487e+08
Burundi	Construction (ISIC F)	3.65472e+07	3.44513e+07	3.094e+07	3.52716e+07	3.57301e+07	3.71236e+07	4.06767e+07	5.1938e+07	5.99393e+07	7.28806e+07	8.86224e+07	9.33194e+07	9.8172e+07	1.07008e+08
Cabo Verde	Construction (ISIC F)	8.00775e+07	8.36834e+07	9.6712e+07	9.70027e+07	9.7464e+07	1.12293e+08	1.30467e+08	1.41615e+08	1.687e+08	1.55778e+08	1.38713e+08	1.39586e+08	1.25886e+08	1.38454e+08
Cambodia	Construction (ISIC F)	2.08038e+08	2.04253e+08	2.59553e+08	2.88462e+08	3.26419e+08	3.98419e+08	4.78083e+08	5.10341e+08	5.3994e+08	5.66937e+08	4.22368e+08	4.5584e+08	5.38802e+08	6.19561e+08
Cameroon	Construction (ISIC F)	3.83113e+08	3.97988e+08	4.2053e+08	4.38573e+08	4.75221e+08	4.80476e+08	4.99516e+08	5.02102e+08	4.60697e+08	5.18409e+08	5.65514e+08	6.19615e+08	6.6106e+08	7.46369e+08
Canada	Construction (ISIC F)	5.03038e+10	5.3946e+10	5.62658e+10	5.81482e+10	6.14837e+10	6.44277e+10	6.71711e+10	6.98716e+10	7.25791e+10	7.01244e+10	7.59902e+10	7.83915e+10	8.24634e+10	8.19237e+10
Cayman Islands	Construction (ISIC F)	1.40574e+08	1.41083e+08	1.43102e+08	1.47661e+08	1.46843e+08	1.55476e+08	1.71686e+08	1.61358e+08	1.64257e+08	1.16157e+08	9.05743e+07	8.84149e+07	8.76106e+07	9.12064e+07
Central African Republic	Construction (ISIC F)	2.37248e+07	2.45314e+07	2.45314e+07	2.45314e+07	2.47767e+07	2.552e+07	2.61153e+07	2.28157e+07	3.32162e+07	3.43788e+07	3.54102e+07	3.82784e+07	3.96182e+07	2.47864e+07
Chad	Construction (ISIC F)	2.85182e+07	3.21057e+07	3.66872e+07	4.52533e+07	5.22879e+07	5.86295e+07	5.8056e+07	6.6147e+07	6.74464e+07	7.75633e+07	8.76466e+07	8.93995e+07	1.05491e+08	1.16041e+08
Chile	Construction (ISIC F)	5.45378e+09	5.6774e+09	5.81988e+09	6.07159e+09	6.27767e+09	6.88645e+09	7.16754e+09	7.51459e+09	8.33864e+09	7.89342e+09	8.03786e+09	8.58446e+09	9.185e+09	9.48099e+09
China	Construction (ISIC F)	7.74718e+10	8.2727e+10	8.99968e+10	1.00871e+11	1.09072e+11	1.26518e+11	1.48315e+11	1.72321e+11	1.88694e+11	2.23707e+11	2.53838e+11	2.78502e+11	3.04479e+11	3.33405e+11
China: Hong Kong SAR	Construction (ISIC F)	6.53585e+09	6.40063e+09	6.28285e+09	5.98911e+09	5.44482e+09	5.01586e+09	4.55638e+09	4.50171e+09	4.90007e+09	4.53478e+09	5.24413e+09	6.20506e+09	6.7203e+09	6.79524e+09
China: Macao SAR	Construction (ISIC F)	1.2527e+08	1.08345e+08	1.48173e+08	2.56521e+08	3.54024e+08	7.81544e+08	1.37584e+09	1.70977e+09	1.54064e+09	8.9623e+08	7.31058e+08	7.86689e+08	8.2992e+08	9.90681e+08
Colombia	Construction (ISIC F)	5.36488e+09	5.66003e+09	6.35806e+09	6.88589e+09	7.62571e+09	8.15009e+09	9.14025e+09	9.90247e+09	1.07759e+10	1.13446e+10	1.1333e+10	1.22667e+10	1.29966e+10	1.42681e+10
Comoros	Construction (ISIC F)	1.81447e+07	1.93845e+07	2.07088e+07	2.54461e+07	2.31708e+07	1.99089e+07	2.01578e+07	2.02556e+07	2.29901e+07	1.8576e+07	2.18453e+07	2.27628e+07	2.37189e+07	2.47151e+07
Congo	Construction (ISIC F)	1.48308e+08	1.67246e+08	1.65871e+08	1.70749e+08	1.75628e+08	1.85385e+08	1.99045e+08	2.19535e+08	2.36164e+08	2.56612e+08	2.79194e+08	3.08509e+08	3.40902e+08	3.75675e+08
Cook Islands	Construction (ISIC F)	5.15477e+06	5.91171e+06	5.85159e+06	7.47725e+06	7.91929e+06	6.8606e+06	7.89536e+06	8.37261e+06	8.51182e+06	8.39323e+06	7.23265e+06	9.60212e+06	1.24541e+07	1.03557e+07
Costa Rica	Construction (ISIC F)	6.53773e+08	7.4788e+08	7.36348e+08	7.71951e+08	8.20285e+08	8.18334e+08	9.67158e+08	1.17273e+09	1.3437e+09	1.30356e+09	1.25051e+09	1.20323e+09	1.27102e+09	1.30106e+09
Côte d'Ivoire	Construction (ISIC F)	3.93539e+08	3.39681e+08	3.30335e+08	3.54968e+08	3.53116e+08	3.81212e+08	3.98185e+08	3.79127e+08	2.77513e+08	2.968e+08	2.86631e+08	2.85132e+08	2.75058e+08	2.83098e+08
Croatia	Construction (ISIC F)	1.69274e+09	1.81681e+09	1.93757e+09	2.42319e+09	2.71375e+09	2.99034e+09	3.1954e+09	3.34874e+09	3.59126e+09	3.23271e+09	2.72401e+09	2.49164e+09	2.20057e+09	2.10758e+09
Cuba	Construction (ISIC F)	1.88655e+09	1.80083e+09	1.7624e+09	1.83229e+09	2.00056e+09	2375100000	3.25783e+09	2.99191e+09	3.07151e+09	3.09273e+09	3.19758e+09	3.27414e+09	3.37087e+09	3.46737e+09
Curaçao	Construction (ISIC F)	8.18267e+07	1.03568e+08	1.09344e+08	9.832e+07	9.47023e+07	1.257e+08	1.1644e+08	1.26323e+08	1.56394e+08	1.4103e+08	1.48388e+08	1.55849e+08	1.56851e+08	1.60171e+08
Cyprus	Construction (ISIC F)	1.25535e+09	1.29936e+09	1.39529e+09	1.52528e+09	1.59931e+09	1.68155e+09	1.82587e+09	1.97776e+09	2.0136e+09	1.63833e+09	1.50476e+09	1.35735e+09	1.09534e+09	7.6064e+08
Czech Republic	Construction (ISIC F)	7.12378e+09	6.94388e+09	7.15816e+09	7.38452e+09	8.00205e+09	8.22413e+09	8.20495e+09	8.59692e+09	8.59075e+09	8.28926e+09	8.61764e+09	8.04371e+09	7.74011e+09	7.67583e+09
Czechoslovakia (Former)	Construction (ISIC F)
D.P.R. of Korea	Construction (ISIC F)	9.70328e+08	1.03903e+09	1.14782e+09	1.17211e+09	1.17653e+09	1.24787e+09	1.10446e+09	1.08786e+09	1.09951e+09	1.10831e+09	1.11205e+09	1.15572e+09	1.13676e+09	1.1565e+09
D.R. of the Congo	Construction (ISIC F)	2.04048e+08	2.23039e+08	2.41819e+08	2.98581e+08	3.73912e+08	4.55574e+08	4.53886e+08	4.78363e+08	4.9651e+08	5.25418e+08	5.32403e+08	6.27738e+08	7.22777e+08	8.24865e+08
Denmark	Construction (ISIC F)	1.22698e+10	1.13703e+10	1.14616e+10	1.18837e+10	1.2018e+10	1.21304e+10	1.31165e+10	1.2705e+10	1.33723e+10	1.21307e+10	1.06369e+10	1.0825e+10	1.05398e+10	1.03178e+10
Djibouti	Construction (ISIC F)	3.27188e+07	3.5026e+07	3.64271e+07	3.78841e+07	4.35668e+07	4.79234e+07	5.41535e+07	6.22765e+07	6.97497e+07	7.67246e+07	8.43971e+07	9.24934e+07	9.23895e+07	9.86128e+07
Dominica	Construction (ISIC F)	1.0962e+07	1.14282e+07	7.50995e+06	1.02087e+07	1.24516e+07	1.334e+07	1.45483e+07	1.89269e+07	2.5097e+07	2.32727e+07	2.52861e+07	2.64245e+07	2.45968e+07	2.06604e+07
Dominican Republic	Construction (ISIC F)	2.18266e+09	2.09701e+09	2.19385e+09	1.81928e+09	1.77746e+09	1.94119e+09	2.41849e+09	2.49682e+09	2.48584e+09	2.38777e+09	2.64925e+09	2.68535e+09	2.70314e+09	2.90614e+09
Ecuador	Construction (ISIC F)	1.73409e+09	2.1383e+09	2.58649e+09	2.56139e+09	2.69461e+09	2925666000	3.06016e+09	3.09069e+09	3.3641e+09	3.45872e+09	3.57732e+09	4.34854e+09	4.9576e+09	4.63172e+09
Egypt	Construction (ISIC F)	3.41637e+09	3.48796e+09	3.56171e+09	3.37752e+09	3.53565e+09	3.71334e+09	4.23431e+09	4.90523e+09	5.67367e+09	6.32143e+09	7.15351e+09	7.41652e+09	7.66149e+09	7.77873e+09
El Salvador	Construction (ISIC F)	6.34557e+08	6.95586e+08	7.41882e+08	7.65442e+08	6.90669e+08	716687006	7.62489e+08	7.09877e+08	6.58057e+08	6.39631e+08	6.07648e+08	6.61966e+08	6.6412e+08	6.63861e+08
Equatorial Guinea	Construction (ISIC F)	1.72358e+07	3.04213e+07	4.24229e+07	4.71319e+07	9.794e+07	1.26832e+08	2.25508e+08	2.94964e+08	3.21216e+08	4.74757e+08	4.31554e+08	3.70705e+08	3.97767e+08	3.93263e+08
Eritrea	Construction (ISIC F)	9.48819e+07	1.01097e+08	1.14542e+08	1.00372e+08	1.06259e+08	1.34706e+08	1.1896e+08	1.36233e+08	1.73542e+08	1.51764e+08	1.56597e+08	1.7965e+08	1.84926e+08	1.88566e+08
Estonia	Construction (ISIC F)	6.44109e+08	6.42404e+08	7.19831e+08	7.89208e+08	8.47374e+08	1.0615e+09	1.14935e+09	1.27713e+09	1.32009e+09	8.63922e+08	8.31591e+08	1.09183e+09	1.17381e+09	1.12747e+09
Ethiopia	Construction (ISIC F)	3.30289e+08	3.56781e+08	4.14675e+08	4.71247e+08	5.63236e+08	6.05785e+08	6.69307e+08	7.42318e+08	8.2651e+08	9.23032e+08	1.02354e+09	1.15439e+09	1.43628e+09	1.88027e+09
Ethiopia (Former)	Construction (ISIC F)
Fiji	Construction (ISIC F)	5.94367e+07	5.51572e+07	5.99122e+07	6.51426e+07	6.75201e+07	8.16101e+07	7.92446e+07	7.09653e+07	7.45136e+07	7.13536e+07	7.64503e+07	7.51252e+07	7.85661e+07	9.27503e+07
Finland	Construction (ISIC F)	1.05262e+10	9.66236e+09	9.79792e+09	1.03585e+10	1.09685e+10	1.15107e+10	1.18634e+10	1.22953e+10	1.19783e+10	1.10306e+10	1.21172e+10	1.22586e+10	1.16877e+10	1.14142e+10
France	Construction (ISIC F)	1.00731e+11	1.04539e+11	1.04009e+11	1.03722e+11	1.05697e+11	1.08543e+11	1.1112e+11	1.16154e+11	1.14278e+11	1.07431e+11	1.04932e+11	1.02868e+11	1.01481e+11	9.93752e+10
French Polynesia	Construction (ISIC F)	2.22304e+08	2.25407e+08	2.12474e+08	2.34283e+08	2.34605e+08	2.41692e+08	2.34928e+08	2.45579e+08	2.73029e+08	2.33188e+08	2.38993e+08	2.37686e+08	2.39519e+08	2.38409e+08
Gabon	Construction (ISIC F)	1.52597e+08	1.85863e+08	2.37212e+08	2.85453e+08	2.40035e+08	2.43057e+08	2.63851e+08	2.75522e+08	2.93217e+08	3.40899e+08	3.06823e+08	3.7823e+08	6.35393e+08	6.20144e+08
Gambia	Construction (ISIC F)	3.13314e+07	3.24512e+07	3.37492e+07	3.47617e+07	3.5457e+07	2.56539e+07	2.6643e+07	2.42014e+07	2.63224e+07	2.7112e+07	2.81423e+07	3.07314e+07	3.46343e+07	3.96562e+07
Georgia	Construction (ISIC F)	1.44194e+08	1.59115e+08	2.27709e+08	3.33714e+08	4.53553e+08	5.17404e+08	5.61523e+08	6.43667e+08	5.72318e+08	5.54292e+08	5.90117e+08	6.32098e+08	7.17935e+08	6.42156e+08
Germany	Construction (ISIC F)	1.25903e+11	1.1812e+11	1.13552e+11	1.08266e+11	1.04957e+11	1.00587e+11	1.00285e+11	9.96402e+10	9.95048e+10	9.66434e+10	1.04052e+11	1.08204e+11	1.08308e+11	1.07975e+11
Ghana	Construction (ISIC F)	6.71668e+08	7.03908e+08	7.39173e+08	7.84262e+08	8.36024e+08	9.19626e+08	9.95035e+08	1.22537e+09	1.70306e+09	1.86205e+09	1.90821e+09	2.29005e+09	2.60314e+09	2.82661e+09
Greece	Construction (ISIC F)	1.12829e+10	1.40662e+10	1.11082e+10	1.26334e+10	1.40162e+10	1.35278e+10	2.00252e+10	1.68941e+10	1.48589e+10	1.19766e+10	1.1827e+10	9.40146e+09	6.96923e+09	5.65177e+09
Greenland	Construction (ISIC F)	8.97829e+07	9.00381e+07	8.87729e+07	9.18313e+07	8.98825e+07	9.43819e+07	1.39822e+08	1.62727e+08	1.79853e+08	1.95054e+08	2.04706e+08	2.58902e+08	2.13066e+08	1.77125e+08
Grenada	Construction (ISIC F)	5.3031e+07	4.41225e+07	4.50018e+07	5.60087e+07	6.06539e+07	1.15752e+08	7.83064e+07	7.40921e+07	6.88759e+07	4.71282e+07	4.66798e+07	4.11588e+07	3.37321e+07	3.87906e+07
Guatemala	Construction (ISIC F)	1.06868e+09	1.19874e+09	1.38383e+09	1.33283e+09	1.2139e+09	1.26825e+09	1.43432e+09	1.56076e+09	1.55338e+09	1.3862e+09	1.22656e+09	1.25591e+09	1.26557e+09	1.28682e+09
Guinea	Construction (ISIC F)	1.86154e+08	2.00115e+08	2.16125e+08	2.13963e+08	2.26801e+08	2.40409e+08	2.55308e+08	2.73813e+08	3.06378e+08	2.37301e+08	2.19577e+08	2.30555e+08	2.50614e+08	2.72417e+08
Guinea-Bissau	Construction (ISIC F)	1.40856e+07	1.38026e+07	1.40122e+07	1.40122e+07	8.36449e+06	5.72546e+06	5.38611e+06	1.00215e+07	5.9378e+06	7.1265e+06	1.08954e+07	1.1985e+07	1.31835e+07	1.16674e+07
Guyana	Construction (ISIC F)	9.12647e+07	9.30819e+07	8.93749e+07	9.45586e+07	9.8341e+07	1.07683e+08	1.20605e+08	1.29455e+08	1.32361e+08	1.33015e+08	1.47196e+08	1.51261e+08	1.60791e+08	1.64921e+08
Haiti	Construction (ISIC F)	7.96262e+08	8.01333e+08	8.08941e+08	8.24156e+08	8.02179e+08	8.25847e+08	8.49515e+08	8.71492e+08	9.17138e+08	9.49259e+08	9.88142e+08	1.07774e+09	1.13691e+09	1.24257e+09
Honduras	Construction (ISIC F)	5.96531e+08	5.50071e+08	4.87017e+08	5.0532e+08	5.11442e+08	4.99534e+08	5.46489e+08	5.82393e+08	6.23565e+08	5.40726e+08	5.2788e+08	5.51159e+08	5.65394e+08	5.49783e+08
Hungary	Construction (ISIC F)	4.08445e+09	4.39396e+09	4.91647e+09	4.85741e+09	4.83606e+09	5.29039e+09	5.11241e+09	4.80195e+09	4.33421e+09	4.17304e+09	3.75665e+09	3.86763e+09	3.6432e+09	3.88454e+09
Iceland	Construction (ISIC F)	1.03686e+09	1.06456e+09	9.70714e+08	1.04763e+09	1.25685e+09	1.53837e+09	1.7399e+09	1.8522e+09	1.54914e+09	9.2764e+08	8.18415e+08	7.96878e+08	7.96878e+08	8.83027e+08
India	Construction (ISIC F)	3.71496e+10	3.86764e+10	4.17367e+10	4.67485e+10	5.43249e+10	6.12978e+10	6.76758e+10	7.50129e+10	7.89661e+10	8.42345e+10	9.29309e+10	9.79802e+10	9.90674e+10	1.00688e+11
Indonesia	Construction (ISIC F)	1.48602e+10	1.55408e+10	1.63926e+10	1.73924e+10	1.86951e+10	2.01047e+10	2.17807e+10	2.36388e+10	2.54244e+10	2.7222e+10	2.91219e+10	3.08801e+10	3.31627e+10	3.53426e+10
Iran (Islamic Republic of)	Construction (ISIC F)	5.49481e+09	5.82174e+09	6.89709e+09	7.03319e+09	7.0387e+09	7.29658e+09	7.42619e+09	8.58903e+09	1.00751e+10	9.57757e+09	1.02727e+10	1.04879e+10	9.7809e+09	9.61903e+09
Iraq	Construction (ISIC F)	5.2831e+08	1.08261e+09	1.31541e+09	3.15278e+08	8.78849e+08	1.82407e+09	1.92595e+09	1.96195e+09	2.04674e+09	2.17876e+09	3.41571e+09	3.42694e+09	5.36814e+09	6.1334e+09
Ireland	Construction (ISIC F)	1.33365e+10	1.37613e+10	1.40149e+10	1.48892e+10	1.63785e+10	1.80937e+10	1.89386e+10	1.91189e+10	1.80213e+10	1.31109e+10	9.68142e+09	8.30882e+09	7.8184e+09	8.73875e+09
Israel	Construction (ISIC F)	6.4247e+09	6.28001e+09	6.27132e+09	5.99371e+09	5.48352e+09	5.55925e+09	6.12922e+09	6.38737e+09	6.66659e+09	6.82662e+09	7.58514e+09	8.42159e+09	8.82908e+09	8.86258e+09
Italy	Construction (ISIC F)	8.38272e+10	8.86324e+10	9.11409e+10	9.40491e+10	9.61461e+10	9.7958e+10	1.00127e+11	1.0032e+11	9.74126e+10	8.96937e+10	8.63515e+10	8.18557e+10	7.75608e+10	7.30331e+10
Jamaica	Construction (ISIC F)	6.91851e+08	6.92238e+08	6.82628e+08	7.16572e+08	7.77723e+08	8.39249e+08	8.08067e+08	8.44457e+08	7.80463e+08	7.12706e+08	7.03406e+08	7.09254e+08	6.7808e+08	6.90714e+08
Japan	Construction (ISIC F)	3.16148e+11	3.04619e+11	2.95152e+11	2.8724e+11	2.82395e+11	2.63279e+11	2.66881e+11	2.61235e+11	2.42385e+11	2.37576e+11	2.32125e+11	2.34292e+11	2.3665e+11	2.39862e+11
Jordan	Construction (ISIC F)	3.50773e+08	3.94679e+08	4.29387e+08	4.29669e+08	4.81173e+08	5.38983e+08	5.65309e+08	5.95971e+08	6.75927e+08	7.64974e+08	7.29858e+08	6.98839e+08	6.92186e+08	7.52243e+08
Kazakhstan	Construction (ISIC F)	1.67845e+09	2.13834e+09	2.55532e+09	2.80574e+09	3.20976e+09	4.47762e+09	6.10747e+09	7.13964e+09	7.42522e+09	7.18761e+09	7.56379e+09	7.62731e+09	7.86376e+09	8.09967e+09
Kenya	Construction (ISIC F)	7.46712e+08	7.75345e+08	7.60481e+08	7.68068e+08	8.02217e+08	8.62372e+08	9.17123e+08	9.95052e+08	9.78198e+08	1.14976e+09	1.36931e+09	1.42449e+09	1.5842e+09	1.67082e+09
Kiribati	Construction (ISIC F)	3.99787e+06	3.96783e+06	3.93868e+06	3.9104e+06	3.96166e+06	3.84234e+06	3.74701e+06	3.79223e+06	3.90959e+06	4.0248e+06	4.05064e+06	4.05818e+06	4.10986e+06	4.28735e+06
Kosovo	Construction (ISIC F)	2.64064e+08	3.45949e+08	3.13329e+08	3.22668e+08	3.61533e+08	3.40102e+08	3.03098e+08	3.00858e+08	2.58752e+08	3.10767e+08	2.62044e+08	2.22028e+08	1.67428e+08	2.33098e+08
Kuwait	Construction (ISIC F)	1.00589e+09	9.97717e+08	1.2635e+09	1.34937e+09	1.46795e+09	1.49658e+09	1.58244e+09	1.64378e+09	1.73374e+09	1.5988e+09	1.6027e+09	1.61982e+09	1.64616e+09	1.76345e+09
Kyrgyzstan	Construction (ISIC F)	5.19983e+07	5.40749e+07	5.48352e+07	5.3634e+07	5.65292e+07	6.64662e+07	7.91723e+07	1.04747e+08	1.1607e+08	1.41703e+08	1.15503e+08	1.18402e+08	1.53547e+08	1.72565e+08
Lao People's DR	Construction (ISIC F)	7.9463e+07	8.98175e+07	1.13093e+08	1.2561e+08	1.31256e+08	1.25306e+08	1.24791e+08	1.36706e+08	1.4366e+08	1.84603e+08	2.21524e+08	2.76537e+08	3.29494e+08	3.68416e+08
Latvia	Construction (ISIC F)	6.04715e+08	5.83558e+08	6.44291e+08	6.62461e+08	7.89776e+08	9.70232e+08	1.51857e+09	2.40728e+09	2.6084e+09	1.52803e+09	9.1037e+08	1.18665e+09	1.46941e+09	1.60096e+09
Lebanon	Construction (ISIC F)	7.93223e+08	7.51975e+08	7.60999e+08	7.78502e+08	7.95629e+08	8.22554e+08	8.44094e+08	1.00497e+09	1.14161e+09	1.3698e+09	1.50308e+09	1.55154e+09	1.56029e+09	1.6754e+09
Lesotho	Construction (ISIC F)	1.05349e+08	9.33301e+07	7.4782e+07	7.18392e+07	5.79935e+07	6.02654e+07	5.9425e+07	5.9872e+07	7.70977e+07	8.1027e+07	9.23341e+07	9.55707e+07	1.28411e+08	1.09984e+08
Liberia	Construction (ISIC F)	707304	11390221	17054416	10812952	17914384	19000000	19076000	21740000	23430000	24541000	26675000	27898000	30631979	32722198
Libya	Construction (ISIC F)	1.47852e+09	1.55098e+09	1.81879e+09	1.59994e+09	1.74481e+09	2.05097e+09	2.20658e+09	2.56899e+09	2.98864e+09	3.25813e+09	3.44705e+09	7.24328e+08	2.30108e+09	1.81879e+09
Liechtenstein	Construction (ISIC F)	2.70708e+08	2.64522e+08	2.61406e+08	2.66064e+08	2.69406e+08	2.77333e+08	3.0577e+08	3.21626e+08	2.85206e+08	2.58253e+08	2.97817e+08	2.75583e+08	2.97381e+08	2.10183e+08
Lithuania	Construction (ISIC F)	8.97966e+08	9.79434e+08	1.13349e+09	1.39935e+09	1.57318e+09	1.8429e+09	2.36012e+09	3.01623e+09	3.07595e+09	1.67202e+09	1.56886e+09	1.86853e+09	1.76595e+09	1.95334e+09
Luxembourg	Construction (ISIC F)	1.74837e+09	1.72039e+09	1.79314e+09	1.82336e+09	1.90556e+09	1.89499e+09	2.02408e+09	2.23822e+09	2.31645e+09	2.25514e+09	2.32726e+09	2.60857e+09	2.32552e+09	2.34865e+09
Madagascar	Construction (ISIC F)	7.17996e+07	8.14926e+07	6.91511e+07	8.98965e+07	1.15966e+08	1.37773e+08	1.75837e+08	2.14241e+08	2.73424e+08	2.25049e+08	2.30846e+08	2.39397e+08	2.47466e+08	2.55632e+08
Malawi	Construction (ISIC F)	8.17018e+07	8.03303e+07	8.78477e+07	8.88069e+07	9.14372e+07	1.02572e+08	1.15804e+08	1.31901e+08	1.4894e+08	1.51608e+08	1.47949e+08	1.44794e+08	1.48581e+08	1.57634e+08
Malaysia	Construction (ISIC F)	4.04634e+09	4.17841e+09	4.27543e+09	4.35334e+09	4.31627e+09	4.25313e+09	4.23069e+09	4.59218e+09	4.79286e+09	5.08834e+09	5.66635e+09	5.93173e+09	7.00564e+09	7.76902e+09
Maldives	Construction (ISIC F)	2.81107e+07	2.96854e+07	3.14946e+07	3.61831e+07	5.54569e+07	6.61641e+07	7.38339e+07	9.94168e+07	1.05904e+08	6.63934e+07	7.25649e+07	8.63428e+07	8.52921e+07	8.28311e+07
Mali	Construction (ISIC F)	1.81086e+08	1.93609e+08	2.02103e+08	2.10986e+08	2.27904e+08	2.36913e+08	2.4402e+08	2.6525e+08	2.77185e+08	2.93819e+08	3.14383e+08	3.30103e+08	2.47579e+08	2.72335e+08
Malta	Construction (ISIC F)	3.01672e+08	3.23145e+08	3.98175e+08	4.34424e+08	4.18422e+08	4.03628e+08	3.49427e+08	2.98648e+08	3.03989e+08	2.76239e+08	2.89389e+08	2.9894e+08	2.9088e+08	2.81006e+08
Marshall Islands	Construction (ISIC F)	6.99505e+06	8.21791e+06	8.62068e+06	8.01161e+06	7.58117e+06	7.71562e+06	1.10773e+07	9.62716e+06	9.87595e+06	9.09659e+06	8.66391e+06	8.13571e+06	7.32809e+06	9.12962e+06
Mauritania	Construction (ISIC F)	5.49064e+07	5.76928e+07	6.52707e+07	7.46184e+07	1.19695e+08	1.49295e+08	1.97092e+08	2.03824e+08	1.82049e+08	1.65852e+08	1.72372e+08	1.92853e+08	2.17341e+08	2.17802e+08
Mauritius	Construction (ISIC F)	2.51527e+08	2.66598e+08	2.83408e+08	3.21086e+08	3.22691e+08	3.07531e+08	3.25679e+08	3.76651e+08	4.20597e+08	4.45654e+08	4.64955e+08	4.55543e+08	4.42124e+08	4.00564e+08
Mexico	Construction (ISIC F)	6.17007e+10	5.81995e+10	5.94493e+10	6.14085e+10	6.46686e+10	6.69892e+10	7.28107e+10	7.62365e+10	7.91384e+10	7.43389e+10	7.48999e+10	7.79398e+10	7.98498e+10	7.60386e+10
Micronesia (FS of)	Construction (ISIC F)	8.20363e+06	7.91027e+06	5.9757e+06	5.41824e+06	5.60468e+06	7070497	5.0788e+06	4.37741e+06	5.60051e+06	8.99111e+06	1.13506e+07	1.34132e+07	1.28665e+07	1.26946e+07
Monaco	Construction (ISIC F)	2.82821e+08	2.86943e+08	2.92483e+08	2.9448e+08	2.96262e+08	3.15332e+08	3.24138e+08	3.40735e+08	2.89749e+08	2.96265e+08	3.25831e+08	3.26567e+08	3.60028e+08	3.79038e+08
Mongolia	Construction (ISIC F)	2.95782e+07	3.30057e+07	4.05942e+07	6.20338e+07	5.8159e+07	6.75447e+07	7.032e+07	7.54161e+07	6.50464e+07	4.29099e+07	4.99699e+07	6.77818e+07	9.4175e+07	1.56791e+08
Montenegro	Construction (ISIC F)	6.49938e+07	6.84391e+07	6.48804e+07	5.48893e+07	5.69202e+07	6.73929e+07	8.62632e+07	1.06647e+08	1.28724e+08	1.04009e+08	9.62913e+07	1.1154e+08	9.82674e+07	9.94471e+07
Montserrat	Construction (ISIC F)	4.67352e+06	4.30277e+06	5.66811e+06	5.60751e+06	4.89454e+06	4.94444e+06	3.2761e+06	2.89109e+06	3.0016e+06	3.35452e+06	2.98734e+06	3.32957e+06	3.53935e+06	3.8909e+06
Morocco	Construction (ISIC F)	2.61931e+09	2.84619e+09	2.87463e+09	3.10332e+09	3.35276e+09	3.55578e+09	3.86456e+09	4.31506e+09	4.7228e+09	4.88129e+09	5.00944e+09	5.21815e+09	5.33015e+09	5.40452e+09
Mozambique	Construction (ISIC F)	8.79869e+07	9.38599e+07	1.03992e+08	1.14038e+08	1.06076e+08	1.20082e+08	1.32626e+08	1.48221e+08	1.63689e+08	1.90644e+08	2.31563e+08	2.59943e+08	2.81775e+08	3.09812e+08
Myanmar	Construction (ISIC F)	1.4307e+08	1.85201e+08	2.9718e+08	3.55863e+08	4.03842e+08	4.48282e+08	5.16494e+08	6.05322e+08	7.14932e+08	8.13297e+08	9.15347e+08	9.97714e+08	1.0908e+09	1.14781e+09
Namibia	Construction (ISIC F)	1.31125e+08	2.07898e+08	1.43355e+08	1.82401e+08	1.93252e+08	1.97977e+08	2.71706e+08	3.11132e+08	3.5915e+08	2.97669e+08	3.16773e+08	3.65382e+08	3.91843e+08	5.29769e+08
Nauru	Construction (ISIC F)	1.09945e+06	1.50783e+06	1.51722e+06	1.4581e+06	849422	878216	1.9292e+06	921407	1.51168e+06	1.56927e+06	1.67718e+06	1.7048e+06	1.70424e+06	2.55231e+06
Nepal	Construction (ISIC F)	4.56939e+08	4.60893e+08	4.90431e+08	5.00751e+08	4.99005e+08	5.13458e+08	5.52847e+08	5.66592e+08	5.95234e+08	6.01142e+08	6.38233e+08	6.68785e+08	6.70244e+08	6.808e+08
Netherlands	Construction (ISIC F)	3.47224e+10	3.50765e+10	3.39628e+10	3.21243e+10	3.13665e+10	3.23969e+10	3.36467e+10	3.59798e+10	3.77929e+10	3.61156e+10	3.25356e+10	3.28415e+10	3.01291e+10	2.88149e+10
Netherlands Antilles (former)	Construction (ISIC F)	1.5324e+08	1.66098e+08	1.68999e+08	1.64853e+08	1.53191e+08	1.88624e+08	1.68643e+08	1.80401e+08	1.98417e+08	1.86619e+08	1.88922e+08	1.91153e+08	1.89402e+08
New Caledonia	Construction (ISIC F)	4.45687e+08	4.66461e+08	4.76953e+08	4.95458e+08	4.94898e+08	5.08342e+08	6.17495e+08	5.88705e+08	7.45403e+08	7.45843e+08	6.92718e+08	7.76322e+08	7.79401e+08	7.85733e+08
New Zealand	Construction (ISIC F)	4.24228e+09	4.39446e+09	4.93327e+09	5.43271e+09	5.81757e+09	6.13192e+09	6.50326e+09	7.11845e+09	6.35755e+09	6.33698e+09	6.02674e+09	6.25355e+09	7.14607e+09	7.99923e+09
Nicaragua	Construction (ISIC F)	2.93476e+08	2.99575e+08	2.59778e+08	2.66833e+08	2.99058e+08	3.20893e+08	3.10556e+08	2.83724e+08	2.42354e+08	1.71977e+08	1.41594e+08	1.6834e+08	2.23768e+08	2.62288e+08
Niger	Construction (ISIC F)	5.55631e+07	6.02797e+07	6.40552e+07	7.07906e+07	7.43425e+07	7.8909e+07	8.28975e+07	8.58749e+07	9.01568e+07	9.72764e+07	1.06553e+08	1.1114e+08	1.19475e+08	1.26654e+08
Nigeria	Construction (ISIC F)	3.56174e+09	3.98915e+09	4.16242e+09	4.52664e+09	4.21978e+09	4.7302e+09	5.34486e+09	6.04116e+09	6.83074e+09	7.64869e+09	8.5553e+09	9.89964e+09	1.08343e+10	1.2375e+10
Norway	Construction (ISIC F)	1.1629e+10	1.14785e+10	1.16731e+10	1.2127e+10	1.25445e+10	1.30744e+10	1.40731e+10	1.55092e+10	1.57231e+10	1.45901e+10	1.42099e+10	1.45995e+10	1.56528e+10	1.6642e+10
Oman	Construction (ISIC F)	4.19796e+08	4.87563e+08	6.23742e+08	7.51818e+08	7.96837e+08	1.18812e+09	1.45277e+09	1.99518e+09	2.65975e+09	3.06348e+09	3.22656e+09	3.38485e+09	3.51129e+09	3.68035e+09
Pakistan	Construction (ISIC F)	2.3757e+09	2.38821e+09	2.42613e+09	2.52259e+09	2.25152e+09	2.66942e+09	2.94142e+09	3.32107e+09	3.83133e+09	3.45271e+09	3.74084e+09	3.42078e+09	3.52876e+09	3.71154e+09
Palau	Construction (ISIC F)	1.16901e+07	1.28663e+07	1.78938e+07	2.14091e+07	2.2957e+07	24313467	2.35204e+07	1.67976e+07	1.11467e+07	7.02633e+06	5.54403e+06	4.63329e+06	5.58383e+06	5.46208e+06
Panama	Construction (ISIC F)	6.25029e+08	4.88824e+08	4.54016e+08	6.01513e+08	6.85215e+08	692200000	8.19557e+08	9.97904e+08	1.30419e+09	1.36251e+09	1.45786e+09	1.73353e+09	2.2376e+09	2.14905e+09
Papua New Guinea	Construction (ISIC F)	2.0678e+08	2.62975e+08	3.52285e+08	3.71423e+08	3.83369e+08	4.01618e+08	4.49846e+08	5.21837e+08	6.00086e+08	7.18904e+08	8.41836e+08	1.06074e+09	1.31531e+09	1.47225e+09
Paraguay	Construction (ISIC F)	3.14922e+08	3.10457e+08	2.82818e+08	3.23403e+08	3.30324e+08	3.45189e+08	3.33108e+08	3.57091e+08	3.96371e+08	4.04298e+08	4.56857e+08	4.6371e+08	4.68347e+08	5.26242e+08
Peru	Construction (ISIC F)	2.9926e+09	2.78601e+09	3.02556e+09	3.14062e+09	3.29454e+09	3.58088e+09	4.11824e+09	4.80187e+09	5.60939e+09	5.99167e+09	7.06081e+09	7.31243e+09	8.46927e+09	9.18468e+09
Philippines	Construction (ISIC F)	5.1491e+09	4.77515e+09	4.58318e+09	4.72947e+09	5.00954e+09	5.00322e+09	5.49513e+09	6.29659e+09	6.73524e+09	7.19585e+09	8.22667e+09	7.41996e+09	8.5827e+09	9.4057e+09
Poland	Construction (ISIC F)	1.97159e+10	1.91304e+10	1.76863e+10	1.72127e+10	1.73833e+10	1.83234e+10	2.01807e+10	2.16981e+10	2.15212e+10	2.40086e+10	2.54657e+10	2.82147e+10	2.73062e+10	2.759e+10
Portugal	Construction (ISIC F)	1.36585e+10	1.39933e+10	1.3379e+10	1.23131e+10	1.23028e+10	1.18568e+10	1.15713e+10	1.17777e+10	1.12584e+10	1.00173e+10	9.37664e+09	8.76846e+09	7.47916e+09	6.50116e+09
Puerto Rico	Construction (ISIC F)	2.39974e+09	2.17476e+09	2.306e+09	2.39974e+09	2.18414e+09	2.0529e+09	2.15601e+09	2.04462e+09	1.79422e+09	1.50152e+09	1.28939e+09	1.33919e+09	1.3064e+09	1.294e+09
Qatar	Construction (ISIC F)	1.24595e+09	1.54326e+09	1.72658e+09	2.22979e+09	2.41679e+09	2.4022e+09	3.95666e+09	5.5686e+09	9.98006e+09	1.06647e+10	1.16788e+10	1.29093e+10	1.42674e+10	1.62126e+10
Republic of Korea	Construction (ISIC F)	4.40855e+10	4.62555e+10	4.75754e+10	5.15539e+10	5.22839e+10	5.19609e+10	5.28285e+10	5.41433e+10	5.27626e+10	5.3981e+10	5.19911e+10	4.91523e+10	4.82641e+10	5.0002e+10
Republic of Moldova	Construction (ISIC F)	4.99651e+07	6.21889e+07	6.57205e+07	7.67188e+07	9.7718e+07	9.97684e+07	1.18101e+08	1.43123e+08	1.43576e+08	1.05142e+08	1.18507e+08	1.2081e+08	1.22944e+08	1.29214e+08
Romania	Construction (ISIC F)	4.42456e+09	4.8975e+09	5.3472e+09	5.6517e+09	6.17801e+09	6.87214e+09	8.4233e+09	1.10694e+10	1.38947e+10	1.25203e+10	1.19529e+10	9.72176e+09	9.91009e+09	9.95086e+09
Russian Federation	Construction (ISIC F)	2.27046e+10	2.49523e+10	2.5651e+10	2.88973e+10	3.17563e+10	3.49997e+10	3.94696e+10	4.46038e+10	4.95431e+10	4.22593e+10	4.41325e+10	4.75057e+10	4.87226e+10	4.75755e+10
Rwanda	Construction (ISIC F)	7.80386e+07	8.39443e+07	8.61191e+07	9.31803e+07	1.11825e+08	1.21971e+08	1.37973e+08	1.58945e+08	2.03096e+08	2.06408e+08	2.24068e+08	2.7705e+08	3.1789e+08	3.52107e+08
Saint Kitts and Nevis	Construction (ISIC F)	8.8659e+07	1.01028e+08	1.05453e+08	8.03539e+07	7.28242e+07	7.77041e+07	9.34206e+07	1.0719e+08	1.02973e+08	8.4578e+07	7.35114e+07	7.03114e+07	6.55338e+07	7.2889e+07
Saint Lucia	Construction (ISIC F)	8.77762e+07	7.09522e+07	6.98392e+07	7.8511e+07	9.83682e+07	7.3263e+07	1.10862e+08	7.95245e+07	1.00793e+08	1.0031e+08	9.08978e+07	9.27848e+07	8.81227e+07	8.00388e+07
Samoa	Construction (ISIC F)	2.49251e+07	2.63619e+07	2.80184e+07	3.18097e+07	4.19797e+07	4.66415e+07	5.28047e+07	6.03935e+07	5.73578e+07	5.62783e+07	5.92697e+07	6.86054e+07	7.03595e+07	7.15553e+07
San Marino	Construction (ISIC F)	5.40736e+07	5.82435e+07	6.10661e+07	6.44232e+07	6.82431e+07	7.11533e+07	7.30205e+07	7.52549e+07	7.59782e+07	7.04867e+07	6.69665e+07	6.69896e+07	6.40239e+07	5.99582e+07
Sao Tome and Principe	Construction (ISIC F)	8.64495e+06	9.95762e+06	7.66131e+06	8.41526e+06	9.15731e+06	9.39932e+06	1.0059e+07	1.05685e+07	1.101e+07	1.15932e+07	1.23736e+07	1.2453e+07	1.31896e+07	1.37589e+07
Saudi Arabia	Construction (ISIC F)	1.21511e+10	1.22581e+10	1.2566e+10	1.32554e+10	1.4435e+10	1.55802e+10	1.69284e+10	1.88951e+10	1.96226e+10	1.99264e+10	2.20636e+10	2.42409e+10	2.53978e+10	2.76251e+10
Senegal	Construction (ISIC F)	2.51068e+08	2.46216e+08	2.75694e+08	2.86628e+08	3.38221e+08	3.71527e+08	4.20022e+08	4.59599e+08	4.56852e+08	4.36429e+08	4.57051e+08	4.90526e+08	4.84667e+08	5.36625e+08
Serbia	Construction (ISIC F)	7.90277e+08	7.07071e+08	9.04449e+08	1.11816e+09	1.26352e+09	1.2529e+09	1.44932e+09	1.45197e+09	1.64217e+09	1.43113e+09	1.39671e+09	1.47913e+09	1.33376e+09	1.28221e+09
Seychelles	Construction (ISIC F)	3.77618e+07	3.82537e+07	3.98429e+07	3.18024e+07	4.26239e+07	5.65525e+07	6.54717e+07	7.19857e+07	8.01966e+07	7.62416e+07	7.22436e+07	9.21848e+07	7.8465e+07	8.9991e+07
Sierra Leone	Construction (ISIC F)	1.50467e+07	1.66847e+07	2.10093e+07	2.46506e+07	2.81005e+07	3.42358e+07	3.47856e+07	3.62235e+07	3.72465e+07	3.4167e+07	3.86811e+07	4.80099e+07	5.37734e+07	5.63537e+07
Singapore	Construction (ISIC F)	5.07307e+09	5.03972e+09	4.34289e+09	3.94629e+09	3.73126e+09	3.75848e+09	3.86128e+09	4.49057e+09	5.39258e+09	6.31634e+09	6.56231e+09	6.92863e+09	7.52519e+09	7.96781e+09
Sint Maarten (Dutch part)	Construction (ISIC F)						6.00559e+07	5.28586e+07	5.48697e+07	5.47717e+07	5.03674e+07	5.13892e+07	5.57192e+07	4.92891e+07	5.32017e+07
Slovakia	Construction (ISIC F)	2.68333e+09	2.39303e+09	2.97052e+09	2.52754e+09	2.72606e+09	2.96586e+09	3.56123e+09	4.01314e+09	4.83335e+09	4.45078e+09	4.20409e+09	4.31218e+09	4.58908e+09	4.42232e+09
Slovenia	Construction (ISIC F)	1.85334e+09	1.84696e+09	1.89354e+09	1.99288e+09	2.0081e+09	2.07543e+09	2.37604e+09	2.80171e+09	2.93469e+09	2.54065e+09	2.07708e+09	1.86666e+09	1.72638e+09	1.57393e+09
Solomon Islands	Construction (ISIC F)	1.65855e+07	1.59369e+07	1.44751e+07	9.66935e+06	5.7837e+06	6.37461e+06	7.03714e+06	1.66707e+07	2.31348e+07	2.25976e+07	1.86404e+07	1.62588e+07	1.65274e+07	1.83918e+07
Somalia	Construction (ISIC F)	7.13776e+07	6.93803e+07	7.34043e+07	7.87628e+07	8.19133e+07	8.54356e+07	8.6888e+07	8.9234e+07	9.17326e+07	9.39341e+07	9.64704e+07	9.89786e+07	9.89787e+07	1.01519e+08
South Africa	Construction (ISIC F)	4.57967e+09	4.80522e+09	5.08434e+09	5.47522e+09	5.974e+09	6.68608e+09	7.38389e+09	8.52991e+09	9.37211e+09	1.01729e+10	1.02474e+10	1.02856e+10	1.04998e+10	1.07858e+10
South Sudan	Construction (ISIC F)									5.6738e+08	6.03667e+08	9.25286e+08	6.71981e+08	5.69608e+08	7.25369e+08
Spain	Construction (ISIC F)	1.04249e+11	1.10951e+11	1.1448e+11	1.1621e+11	1.16735e+11	1.20156e+11	1.225e+11	1.23109e+11	1.23368e+11	1.14035e+11	9.74667e+10	8.50503e+10	7.29091e+10	6.69892e+10
Sri Lanka	Construction (ISIC F)	1.36461e+09	1.39644e+09	1.3964e+09	1.4483e+09	1.53346e+09	1.67166e+09	1.82537e+09	1.98876e+09	2.14421e+09	2.26405e+09	2.47437e+09	2.82612e+09	3.4365e+09	3.93232e+09
St. Vincent and the Grenadines	Construction (ISIC F)	2.6874e+07	2.77982e+07	3.03262e+07	3.65864e+07	4.02291e+07	4.00856e+07	4.35235e+07	4.91977e+07	4.41209e+07	4.04568e+07	3.91958e+07	3.78742e+07	3.65369e+07	3.89479e+07
State of Palestine	Construction (ISIC F)	2.77235e+08	1.59921e+08	9.26664e+07	1.44063e+08	2.34341e+08	284400000	2.76853e+08	2.85546e+08	1.8925e+08	3.6971e+08	5.09188e+08	6.95954e+08	6.83152e+08	7.65501e+08
Sudan	Construction (ISIC F)									1.43034e+09	1.44695e+09	1.31304e+09	1.49182e+09	1.39643e+09	1.41323e+09
Sudan (Former)	Construction (ISIC F)	6.98552e+08	9.14413e+08	9.61436e+08	1.03012e+09	1.29115e+09	1.54569e+09	1.69748e+09	1.84581e+09	1.99772e+09	2.04033e+09	2.09825e+09
Suriname	Construction (ISIC F)	6.43428e+07	6.72486e+07	6.76679e+07	7.91625e+07	8.71742e+07	9.47708e+07	9.96276e+07	1.02727e+08	1.11014e+08	1.18991e+08	1.07363e+08	1.19803e+08	1.34136e+08	1.46576e+08
Swaziland	Construction (ISIC F)	7.16011e+07	8.9713e+07	8.00908e+07	7.21506e+07	8.46239e+07	8.93591e+07	9.2487e+07	8.93591e+07	8.66784e+07	8.44495e+07	8.22819e+07	8.01739e+07	9.46678e+07	8.56493e+07
Sweden	Construction (ISIC F)	1.62721e+10	1.71472e+10	1.74839e+10	1.74417e+10	1.84582e+10	1.87893e+10	2.07126e+10	2.20768e+10	2.06425e+10	1.86702e+10	1.93489e+10	1.89092e+10	1.7788e+10	1.7726e+10
Switzerland	Construction (ISIC F)	1.79911e+10	1.80216e+10	1.89832e+10	1.9442e+10	1.9367e+10	1.98181e+10	1.94973e+10	1.91482e+10	1.94535e+10	2.0036e+10	2.13795e+10	2.15179e+10	2.18188e+10	2.16563e+10
Syrian Arab Republic	Construction (ISIC F)	6.80113e+08	4.15227e+08	7.39515e+08	9.19016e+08	9.61355e+08	1.0928e+09	1.2224e+09	1.23189e+09	1.12782e+09	1.17338e+09	1.23015e+09	1.21391e+09	8.14041e+08	6.42921e+08
Tajikistan	Construction (ISIC F)	3.85069e+07	6.7995e+07	5.50204e+07	8.72352e+07	9.01728e+07	1.04955e+08	1.12528e+08	1.24227e+08	1.50558e+08	1.27218e+08	1.39301e+08	1.1736e+08	8.87244e+07	9.529e+07
TFYR of Macedonia	Construction (ISIC F)	3.47849e+08	2.9766e+08	2.99879e+08	3.0914e+08	3.24386e+08	3.31124e+08	3.5755e+08	3.77356e+08	4.05624e+08	3.95577e+08	4.06734e+08	4.47338e+08	4.22118e+08	4.38792e+08
Thailand	Construction (ISIC F)	4.33461e+09	4.35864e+09	4.60385e+09	4.74002e+09	5.12458e+09	5.63534e+09	5.70255e+09	5.92711e+09	5.61156e+09	5.81193e+09	6.30606e+09	6.03691e+09	6.45496e+09	6.51891e+09
Timor-Leste	Construction (ISIC F)	6.12846e+07	5.88894e+07	4.4793e+07	3.58569e+07	3.01939e+07	30883171	1.71146e+07	3.32526e+07	7.97439e+07	1.19608e+08	1.27864e+08	1.95279e+08	1.82323e+08	1.68945e+08
Togo	Construction (ISIC F)	5.24952e+07	4.36206e+07	4.15194e+07	4.20627e+07	4.95122e+07	5.1825e+07	6.60172e+07	6.53535e+07	7.65128e+07	8.59209e+07	9.17409e+07	1.11078e+08	1.06181e+08	1.14093e+08
Tonga	Construction (ISIC F)	1.63868e+07	1.81077e+07	1.9112e+07	1.95532e+07	1.82095e+07	1.76013e+07	1.57768e+07	1.53117e+07	1.54548e+07	2.08568e+07	2.54003e+07	2.69386e+07	2.72606e+07	1.91039e+07
Trinidad and Tobago	Construction (ISIC F)	7.16337e+08	8.05307e+08	7.64347e+08	9.4305e+08	1.01926e+09	1.1831e+09	1.25702e+09	1.36881e+09	1.41076e+09	1.20105e+09	9.3602e+08	8.53279e+08	8.36228e+08	8.70254e+08
Tunisia	Construction (ISIC F)	1.13866e+09	1.23897e+09	1.29102e+09	1.29698e+09	1.36266e+09	1.45309e+09	1.54718e+09	1.64875e+09	1.69916e+09	1.76246e+09	1.82373e+09	1.77175e+09	1.80016e+09	1.87515e+09
Turkey	Construction (ISIC F)	1.68818e+10	1.39395e+10	1.58782e+10	1.71129e+10	1.95317e+10	2.13564e+10	2.53048e+10	2.65638e+10	2.4572e+10	2.06117e+10	2.4391e+10	2.72058e+10	2.736e+10	2.92795e+10
Turkmenistan	Construction (ISIC F)	7.49429e+08	6.29619e+08	8.94813e+08	7.55391e+08	7.73292e+08	9.0623e+08	9.34422e+08	1.10025e+09	1.78413e+09	1.87236e+09	1.85736e+09	2.03638e+09	2.31162e+09	2.54508e+09
Turks and Caicos Islands	Construction (ISIC F)	3.69221e+07	3.93751e+07	3.63708e+07	4.04555e+07	5.18499e+07	64547000	9.5988e+07	9.99996e+07	1.02812e+08	5.38914e+07	3.23228e+07	2.1521e+07	1.95414e+07	2.40583e+07
Tuvalu	Construction (ISIC F)	1.48512e+06	1.49179e+06	1.55179e+06	1.73394e+06	1.54589e+06	1.1584e+06	1.39598e+06	2.31162e+06	3.5289e+06	3.36089e+06	1.8412e+06	2.74614e+06	1.94429e+06	2.79825e+06
U.R. of Tanzania: Mainland	Construction (ISIC F)	8.38546e+08	9.01906e+08	1.00883e+09	1.14783e+09	1.29648e+09	1.42737e+09	1.56266e+09	1.71423e+09	1.88104e+09	1.81059e+09	1.99764e+09	2.45434e+09	2.53289e+09	3.01226e+09
Uganda	Construction (ISIC F)	3.39217e+08	3.58902e+08	4.11856e+08	4.51115e+08	5.07661e+08	6.32294e+08	6.95421e+08	7.56416e+08	9.19989e+08	1.03537e+09	1.19112e+09	1.23762e+09	1.37187e+09	1.4504e+09
Ukraine	Construction (ISIC F)	2.38523e+09	2.60061e+09	2.56289e+09	3.23653e+09	3.93697e+09	3.48155e+09	3.48818e+09	3.99363e+09	3.01547e+09	1.846e+09	1.88628e+09	1.89667e+09	1.73004e+09	1.8519e+09
United Arab Emirates	Construction (ISIC F)	1.05255e+10	1.07322e+10	1.0713e+10	1.20854e+10	1.47299e+10	1.57691e+10	2.14677e+10	2.36055e+10	2.60303e+10	2.64714e+10	2.62754e+10	2.57985e+10	2.40581e+10	2.49773e+10
United Kingdom	Construction (ISIC F)	1.26358e+11	1.28616e+11	1.35968e+11	1.42561e+11	1.50072e+11	1.46462e+11	1.47574e+11	1.50762e+11	1.46814e+11	1.27438e+11	1.38311e+11	1.41342e+11	1.30714e+11	1.32808e+11
United States	Construction (ISIC F)	6.50799e+11	6.39373e+11	6.19144e+11	6.30062e+11	6.52153e+11	654100000000	6.37764e+11	6.13727e+11	5.60488e+11	4.88628e+11	4.66876e+11	4.64337e+11	4.83211e+11	4.92268e+11
Uruguay	Construction (ISIC F)	1.08237e+09	9.91558e+08	8.1087e+08	7.86971e+08	8.38853e+08	9.61738e+08	1.02953e+09	1.12573e+09	1.15547e+09	1.14154e+09	1.19027e+09	1.2571e+09	1.41105e+09	1.43119e+09
USSR (Former)	Construction (ISIC F)
Uzbekistan	Construction (ISIC F)	5.77357e+08	5.92347e+08	6.12876e+08	6.3272e+08	6.63961e+08	6.97132e+08	7.28549e+08	7.76547e+08	8.29396e+08	8.63403e+08	8.97922e+08	9.30259e+08	1.05216e+09	1.10978e+09
Vanuatu	Construction (ISIC F)	2.02484e+07	1.06059e+07	9.99042e+06	8.31571e+06	7.23458e+06	8.57699e+06	1.12798e+07	1.20817e+07	2.0965e+07	3.06501e+07	2.72085e+07	1.73432e+07	9.66713e+06	1.90369e+07
Venezuela	Construction (ISIC F)	9.92343e+09	1.12621e+10	1.0318e+10	6.24443e+09	7.81065e+09	9.37341e+09	1.22399e+10	1.47851e+10	1.63384e+10	1.63032e+10	1.51698e+10	1.58908e+10	1.85245e+10	1.80945e+10
Viet Nam	Construction (ISIC F)	2.01532e+09	2.27282e+09	2.51304e+09	2.77908e+09	3.03005e+09	3.35937e+09	3.73042e+09	4.18362e+09	4.16772e+09	4.64104e+09	5.10796e+09	5.07651e+09	5.2415e+09	5.5495e+09
Yemen	Construction (ISIC F)	4.69212e+08	4.83976e+08	5.54318e+08	6.4056e+08	7.14872e+08	8.52607e+08	9.28144e+08	9.51963e+08	1.15719e+09	1.29597e+09	1.32924e+09	9.94087e+08	1.08447e+09	1.14663e+09
Yemen Arab Republic (Former)	Construction (ISIC F)
Yemen Democratic (Former)	Construction (ISIC F)
Yugoslavia (Former)	Construction (ISIC F)
Zambia	Construction (ISIC F)	3.10019e+08	3.45653e+08	4.05797e+08	4.93554e+08	5.94621e+08	7.20591e+08	8.24399e+08	9.89206e+08	1.07491e+09	1.1774e+09	1.27269e+09	1.3865e+09	1.56631e+09	1.76053e+09
Zanzibar	Construction (ISIC F)	9.22444e+06	1.28482e+07	1.47428e+07	1.81198e+07	2.49331e+07	2.71272e+07	3.62993e+07	3.85692e+07	3.87629e+07	3.83781e+07	3.85286e+07	4.00336e+07	4.57527e+07	5.05688e+07
Zimbabwe	Construction (ISIC F)	6.73964e+07	4.31693e+07	2.6316e+07	2.50826e+07	2.50192e+07	24231100	2.30622e+07	2.23562e+07	2.3001e+07	8.96635e+07	1.02305e+08	1.68908e+08	2.08597e+08	2.16733e+08
Afghanistan	Exports of goods and services	1.07564e+09	9.86701e+08	1.43143e+09	2.12416e+09	1.67133e+09	1.7238e+09	1.64618e+09	1.55306e+09	1.87234e+09	1.94178e+09	1.74342e+09	1.71955e+09	1.74589e+09	1.72966e+09
Albania	Exports of goods and services	8.85531e+08	8.96576e+08	1.1309e+09	1.35141e+09	1.57614e+09	1.861e+09	2.1423e+09	2.47419e+09	2.82951e+09	2.95271e+09	3.44775e+09	3.70307e+09	3.67943e+09	3.92502e+09
Algeria	Exports of goods and services	4.03521e+10	3.9303e+10	4.14646e+10	4.45745e+10	4.60009e+10	4.87149e+10	4.76919e+10	4.7215e+10	4.60818e+10	4.14276e+10	4.14276e+10	4.0309e+10	3.87773e+10	3.65282e+10
Andorra	Exports of goods and services	6.30708e+08	6.51337e+08	6.58738e+08	7.09241e+08	7.58389e+08	8.01243e+08	8.44919e+08	8.73992e+08	7.86733e+08	6.77696e+08	7.21969e+08	7.75467e+08	8.02096e+08	8.34356e+08
Angola	Exports of goods and services	1.94911e+10	1.69085e+10	1.92554e+10	1.84659e+10	2.0571e+10	2.82235e+10	3.11587e+10	3.8294e+10	4.34637e+10	3.03811e+10	3.14141e+10	3.26393e+10	3.43365e+10	3.46656e+10
Anguilla	Exports of goods and services	7.88577e+07	8.33727e+07	7.45922e+07	8.04379e+07	8.44794e+07	1.13575e+08	1.31964e+08	1.2617e+08	1.18049e+08	1.19514e+08	1.14162e+08	1.17018e+08	1.13674e+08	1.17902e+08
Antigua and Barbuda	Exports of goods and services	5.03997e+08	4.7146e+08	4.495e+08	4.91814e+08	5.58834e+08	5.45267e+08	5.46066e+08	5.58268e+08	5.75114e+08	5.07406e+08	4.66669e+08	4.73068e+08	4.64631e+08	4.60984e+08
Argentina	Exports of goods and services	3.41613e+10	3.50977e+10	3.61832e+10	3.83526e+10	4.14645e+10	4.65966e+10	4.92858e+10	5.32525e+10	5.36609e+10	4.8969e+10	5.60238e+10	5.879e+10	5.53383e+10	5.30362e+10
Armenia	Exports of goods and services	5.56641e+08	7.06877e+08	9.60059e+08	1.23914e+09	1.2177e+09	1.41179e+09	1.30818e+09	1.26228e+09	1.09718e+09	9.82678e+08	1.24269e+09	1.42569e+09	1.54559e+09	1.7977e+09
Aruba	Exports of goods and services	1.63508e+09	1.54351e+09	1.39225e+09	1.35884e+09	1.49472e+09	1.59785e+09	1.52915e+09	1.48604e+09	1.56165e+09	1.5878e+09	1.3638e+09	1.22459e+09	1.40125e+09	1.52349e+09
Australia	Exports of goods and services	1.40096e+11	1.38968e+11	1.39244e+11	1.4093e+11	1.4563e+11	1.49345e+11	1.55151e+11	1.60663e+11	1.63476e+11	1.71878e+11	1.72983e+11	1.81182e+11	1.92103e+11	2.05102e+11
Austria	Exports of goods and services	1.19492e+11	1.26356e+11	1.31533e+11	1.32062e+11	1.43659e+11	1.53012e+11	1.64426e+11	1.76571e+11	1.80559e+11	1.53462e+11	1.73119e+11	1.84508e+11	1.8693e+11	1.89571e+11
Azerbaijan	Exports of goods and services	2.60074e+09	3.4876e+09	3.26788e+09	3.90837e+09	5.45608e+09	8.33682e+09	1.23635e+10	1.68267e+10	1.80719e+10	2.06562e+10	2.25359e+10	2.29866e+10	2.18603e+10	2.23194e+10
Bahamas	Exports of goods and services	2.99242e+09	3.14787e+09	3.16428e+09	3.18565e+09	3.55828e+09	3482130924	3.54982e+09	3.49922e+09	3.42219e+09	3.3135e+09	3.35573e+09	3.56654e+09	3.8253e+09	3.66533e+09
Bahrain	Exports of goods and services	1.09033e+10	1.06354e+10	1.2102e+10	1.22257e+10	1.27932e+10	1.33968e+10	1.36591e+10	1.37209e+10	1.3814e+10	1.38623e+10	1.42269e+10	1.40586e+10	1.36064e+10	1.48129e+10
Bangladesh	Exports of goods and services	6.1221e+09	7.03479e+09	6.87292e+09	7.34508e+09	8.26591e+09	9.5555e+09	1.20228e+10	1.35835e+10	1.45395e+10	1.4543e+10	1.46795e+10	1.89866e+10	2.04636e+10	2.11781e+10
Barbados	Exports of goods and services	1.62061e+09	1.5689e+09	1.48245e+09	1.48809e+09	1.46936e+09	1711700000	1.88329e+09	1.87362e+09	1.78948e+09	1.75185e+09	1.83532e+09	1.4367e+09	1.49901e+09	1.47082e+09
Belarus	Exports of goods and services	1.21456e+10	1.37348e+10	1.49609e+10	1.61728e+10	1.83593e+10	1.8065e+10	1.95413e+10	2.06356e+10	2.12508e+10	1.9742e+10	2.12561e+10	2.77089e+10	3.08118e+10	2.61949e+10
Belgium	Exports of goods and services	2.43387e+11	2.4402e+11	2.51918e+11	2.56001e+11	2.72384e+11	2.85367e+11	3.00094e+11	3.16793e+11	3.21887e+11	2.91315e+11	3.20475e+11	3.41546e+11	3.48137e+11	3.58104e+11
Belize	Exports of goods and services	4.00506e+08	4.20226e+08	4.60627e+08	5.21311e+08	5.51079e+08	6.09027e+08	6.85838e+08	6.48575e+08	6.74588e+08	6.08708e+08	6.94005e+08	6.97352e+08	7.5772e+08	7.56173e+08
Benin	Exports of goods and services	7.7083e+08	7.94282e+08	8.26054e+08	8.41749e+08	8.29122e+08	9.40225e+08	8.93214e+08	1.01201e+09	1.12333e+09	1.06717e+09	1.09865e+09	1.08107e+09	1.18495e+09	1.32655e+09
Bermuda	Exports of goods and services	2.00598e+09	2.05737e+09	2.35946e+09	2.5966e+09	2.05171e+09	1811395780	2.23099e+09	2.47728e+09	2.52528e+09	2.36232e+09	2.34242e+09	2.29084e+09	2.14001e+09	2.12673e+09
Bhutan	Exports of goods and services	1.5479e+08	1.52555e+08	1.57005e+08	1.82538e+08	2.33135e+08	3.13216e+08	4.75047e+08	5.4996e+08	4.98749e+08	4.83984e+08	5.20386e+08	5.37054e+08	5.24161e+08	5.44455e+08
Bolivia	Exports of goods and services	2.0912e+09	2.26638e+09	2.39541e+09	2.68677e+09	3.13333e+09	3.39453e+09	3.77936e+09	3.89612e+09	3.98085e+09	3.55267e+09	3.9027e+09	4.13231e+09	4.62468e+09	4.81406e+09
Bosnia and Herzegovina	Exports of goods and services	2.41041e+09	2.56045e+09	2.49219e+09	2.8029e+09	2.95093e+09	3.5499e+09	4.09481e+09	3.39757e+09	3.43476e+09	3.3501e+09	3.7984e+09	3.96137e+09	3.88423e+09	4.41798e+09
Botswana	Exports of goods and services	4.33637e+09	4.14798e+09	4.4527e+09	4.14103e+09	4.44701e+09	5.25596e+09	5.42062e+09	5.88036e+09	5.73454e+09	3.5743e+09	4.14704e+09	5.28938e+09	4.91899e+09	6.87753e+09
Brazil	Exports of goods and services	8.11175e+10	8.92678e+10	9.58889e+10	1.0586e+11	1.2205e+11	1.33439e+11	1.40165e+11	1.48853e+11	1.49664e+11	1.36008e+11	1.51673e+11	1.58484e+11	1.5924e+11	1.63268e+11
British Virgin Islands	Exports of goods and services	8.66143e+08	9.17252e+08	8.95454e+08	7.88103e+08	8.2416e+08	947000000	9.66034e+08	9.76699e+08	9.74307e+08	1.0166e+09	1.03402e+09	1.01925e+09	9.753e+08	9.74598e+08
Brunei Darussalam	Exports of goods and services	6.22554e+09	6.30684e+09	6.67137e+09	6.82236e+09	6.7734e+09	6.68805e+09	6.93347e+09	6.26532e+09	5.8762e+09	5.56617e+09	5.13205e+09	5.98609e+09	5.77381e+09	5.29978e+09
Bulgaria	Exports of goods and services	7.97332e+09	8.07019e+09	8.78502e+09	9.35275e+09	1.16449e+10	1.2703e+10	1.36765e+10	1.63601e+10	1.67655e+10	1.48013e+10	1.73458e+10	1.93421e+10	1.94929e+10	2.12837e+10
Burkina Faso	Exports of goods and services	4.66575e+08	4.25036e+08	4.13537e+08	4.11347e+08	5.1958e+08	5.32286e+08	6.65194e+08	7.00291e+08	7.41098e+08	8.72975e+08	1.44555e+09	1.75295e+09	1.99994e+09	2.19207e+09
Burundi	Exports of goods and services	4.90037e+07	5.19488e+07	4.52786e+07	5.99489e+07	5.77667e+07	6.93432e+07	7.63043e+07	8.73946e+07	1.53979e+08	1.23393e+08	1.97214e+08	1.64654e+08	2.15499e+08	2.43729e+08
Cabo Verde	Exports of goods and services	3.09538e+08	3.06548e+08	3.43791e+08	2.83408e+08	2.905e+08	3.15569e+08	3.59246e+08	4.12132e+08	4.42469e+08	3.65058e+08	3.98449e+08	4.44168e+08	4.85823e+08	5.32987e+08
Cambodia	Exports of goods and services	1.84628e+09	2.15472e+09	2.4353e+09	2.70522e+09	3.46496e+09	4.03289e+09	4.8066e+09	5.29431e+09	6.12315e+09	5.51906e+09	6.65386e+09	7.91039e+09	9.05145e+09	1.00649e+10
Cameroon	Exports of goods and services	3.12942e+09	3.12891e+09	3.07406e+09	3.07073e+09	3.34582e+09	3.393e+09	3.43755e+09	3.62106e+09	3.48747e+09	3.05131e+09	3.28898e+09	3.36289e+09	3.31974e+09	4.1832e+09
Canada	Exports of goods and services	4.12934e+11	3.98363e+11	4.02545e+11	3.96889e+11	4.2046e+11	4.3028e+11	4.34045e+11	4.38936e+11	4.19713e+11	3.64492e+11	3.87144e+11	4.05246e+11	4.16911e+11	4.22872e+11
Cayman Islands	Exports of goods and services	1.6805e+09	1.68926e+09	1.71992e+09	1.75309e+09	1.76894e+09	1.884e+09	1.97067e+09	2.03313e+09	2.02566e+09	1.87985e+09	1.82883e+09	1.84471e+09	1.87028e+09	1.89618e+09
Central African Republic	Exports of goods and services	3.19989e+08	2.7116e+08	2.50755e+08	2.66342e+08	2.10053e+08	2.03292e+08	2.31163e+08	2.51987e+08	2.48281e+08	2.53893e+08	2.71792e+08	2.78967e+08	2.99611e+08	2.14958e+08
Chad	Exports of goods and services	8.53157e+08	8.07704e+08	8.66856e+08	1.19407e+09	2.91158e+09	3.20248e+09	2.97586e+09	2.69437e+09	2.55508e+09	2.59852e+09	2.67128e+09	2.61785e+09	2.44246e+09	2.40826e+09
Chile	Exports of goods and services	3.64382e+10	3.90733e+10	3.97e+10	4.22655e+10	4.81889e+10	4.9554e+10	5.20819e+10	5.58265e+10	5.54357e+10	5.29135e+10	5.41434e+10	5.71301e+10	5.7777e+10	6.02425e+10
China	Exports of goods and services	3.75018e+11	4.17222e+11	5.042e+11	5.96869e+11	7.08829e+11	8.36621e+11	9.89238e+11	1.15958e+12	1.21682e+12	1.15716e+12	1.36944e+12	1.47578e+12	1.55129e+12	1.68678e+12
China: Hong Kong SAR	Exports of goods and services	2.03624e+11	2.01485e+11	2.18738e+11	2.47403e+11	2.87249e+11	3.222e+11	3.54984e+11	3.84238e+11	3.97762e+11	3.61482e+11	4.24993e+11	4.45371e+11	4.53743e+11	4.82797e+11
China: Macao SAR	Exports of goods and services	6.28971e+09	6.64471e+09	7.60134e+09	8.73838e+09	1.13171e+10	1.11538e+10	1.25337e+10	1.53522e+10	1.67507e+10	1.64933e+10	2.3816e+10	3.0594e+10	3.27867e+10	3.6707e+10
Colombia	Exports of goods and services	1.97438e+10	2.02987e+10	1.98162e+10	2.12747e+10	2.33614e+10	2.46963e+10	2.68197e+10	2.86716e+10	2.99556e+10	2.91033e+10	2.94713e+10	3.29356e+10	3.49555e+10	3.68256e+10
Comoros	Exports of goods and services	5.64931e+07	5.41336e+07	5.71418e+07	6.52021e+07	5.61243e+07	5.52223e+07	5.56311e+07	5.81327e+07	5.6098e+07	5.22273e+07	6.64853e+07	6.7815e+07	6.91713e+07	7.05547e+07
Congo	Exports of goods and services	4.72722e+09	4.51801e+09	4.53167e+09	4.26867e+09	4.28062e+09	4.81974e+09	4.94923e+09	4.09618e+09	4.49553e+09	4.50413e+09	4.82502e+09	4.54267e+09	4.3043e+09	4.10419e+09
Cook Islands	Exports of goods and services	1.18515e+08	1.30297e+08	1.2153e+08	1.32834e+08	1.21279e+08	1.32988e+08	1.48889e+08	1.46688e+08	1.51115e+08	1.45049e+08	1.38138e+08	1.43742e+08	1.48025e+08	1.52642e+08
Costa Rica	Exports of goods and services	7.55989e+09	6.83408e+09	7.08315e+09	7.93792e+09	8.58486e+09	9.683e+09	1.06783e+10	1.1736e+10	1.14995e+10	1.08071e+10	1.1406e+10	1.20273e+10	1.31731e+10	1.3652e+10
Côte d'Ivoire	Exports of goods and services	7.87405e+09	7.43329e+09	7.59925e+09	7.19173e+09	8.21297e+09	8.52506e+09	8.66998e+09	8.45324e+09	8.59152e+09	9.50222e+09	9.73028e+09	9.41891e+09	1.04644e+10	1.13434e+10
Croatia	Exports of goods and services	1.25982e+10	1.38726e+10	1.45291e+10	1.60969e+10	1.70571e+10	1.78465e+10	1.88469e+10	1.94966e+10	1.96508e+10	1.68768e+10	1.79176e+10	1.83205e+10	1.82941e+10	1.88509e+10
Cuba	Exports of goods and services	5.20324e+09	5.01601e+09	4.82545e+09	5.10448e+09	6.07655e+09	8962900000	9.08136e+09	1.03345e+10	1.15304e+10	1.18897e+10	1.35305e+10	1.40584e+10	1.39011e+10	1.46199e+10
Curaçao	Exports of goods and services	1.32736e+09	1.40868e+09	1.35764e+09	1.29064e+09	1.30815e+09	1.39497e+09	1.53235e+09	1.51514e+09	1.84895e+09	1.64426e+09	1.54701e+09	1.76374e+09	1.74597e+09	1.75566e+09
Cyprus	Exports of goods and services	1.03013e+10	1.05255e+10	1.00945e+10	9.95367e+09	1.02017e+10	1.04109e+10	1.05428e+10	1.10996e+10	1.09082e+10	1.01145e+10	1.03806e+10	1.08179e+10	1.06378e+10	1.01074e+10
Czech Republic	Exports of goods and services	4.59752e+10	5.03206e+10	5.07841e+10	5.52688e+10	7.16959e+10	8.47419e+10	9.68567e+10	1.07537e+11	1.12087e+11	1.01067e+11	1.16072e+11	1.26901e+11	1.32085e+11	1.32461e+11
Czechoslovakia (Former)	Exports of goods and services
D.P.R. of Korea	Exports of goods and services	4.84985e+08	6.28198e+08	7.15787e+08	7.12799e+08	7.7165e+08	7.75844e+08	7.39092e+08	7.57385e+08	7.72029e+08	7.61623e+08	7.63175e+08	7.66933e+08	7.76787e+08	7.83639e+08
D.R. of the Congo	Exports of goods and services	1.4028e+09	1.12933e+09	2.06074e+09	2.36459e+09	2.42937e+09	2.74526e+09	2.48804e+09	3.15314e+09	3.30085e+09	2.36734e+09	2.39287e+09	2.7767e+09	2.43043e+09	2.85034e+09
Denmark	Exports of goods and services	1.05955e+11	1.09507e+11	1.13483e+11	1.12973e+11	1.15952e+11	1.25389e+11	1.37671e+11	1.42581e+11	1.47136e+11	1.33171e+11	1.3573e+11	1.45645e+11	1.45486e+11	1.473e+11
Djibouti	Exports of goods and services	2.34442e+08	2.54304e+08	2.66002e+08	2.93667e+08	2.82214e+08	3.14386e+08	3.54313e+08	3.48644e+08	3.82114e+08	4.85285e+08	4.8674e+08	5.41145e+08	5.66101e+08	5.78443e+08
Dominica	Exports of goods and services	1.52668e+08	1.26331e+08	1.28957e+08	1.22626e+08	1.38321e+08	1.29357e+08	1.41691e+08	1.42362e+08	1.48512e+08	1.37494e+08	1.65318e+08	1.58741e+08	1.60187e+08	1.38132e+08
Dominican Republic	Exports of goods and services	9.26443e+09	8.6981e+09	8.87035e+09	9.8136e+09	1.01657e+10	1.00395e+10	1.01052e+10	1.04303e+10	1.00108e+10	9.2676e+09	1.0341e+10	1.12548e+10	1.18596e+10	1.27626e+10
Ecuador	Exports of goods and services	8.48241e+09	8.34778e+09	8.39986e+09	9.0055e+09	1.05525e+10	11463500000	1.22804e+10	1.22825e+10	1.2649e+10	1.20433e+10	1.23431e+10	1.30427e+10	1.36562e+10	1.39772e+10
Egypt	Exports of goods and services	1.87014e+10	1.93168e+10	1.78125e+10	1.99172e+10	2.45885e+10	2.95558e+10	3.58396e+10	4.41847e+10	5.69006e+10	4.8643e+10	4.71916e+10	4.778e+10	4.66816e+10	4.86026e+10
El Salvador	Exports of goods and services	3.78705e+09	3.77936e+09	4.00569e+09	4.19289e+09	4.34366e+09	4382787000	4.64065e+09	4.96944e+09	5.31048e+09	4.46246e+09	4.98073e+09	5.44289e+09	5.03733e+09	5.27153e+09
Equatorial Guinea	Exports of goods and services	3.26966e+09	5.12683e+09	5.50527e+09	5.8227e+09	6.90579e+09	7.1003e+09	6.92071e+09	7.39041e+09	7.75107e+09	7.67726e+09	7.2243e+09	7.03647e+09	6.88167e+09	6.24983e+09
Eritrea	Exports of goods and services	6.56824e+07	7.63213e+07	8.29811e+07	6.20249e+07	6.84306e+07	6.77257e+07	7.79513e+07	6.77164e+07	5.32433e+07	7.25246e+07	8.52169e+07	2.83824e+08	4.1815e+08	4.12485e+08
Estonia	Exports of goods and services	5.44711e+09	5.79207e+09	5.95544e+09	6.56126e+09	7.69582e+09	9.22911e+09	1.01087e+10	1.13838e+10	1.1486e+10	9.15344e+09	1.13546e+10	1.38802e+10	1.50308e+10	1.54145e+10
Ethiopia	Exports of goods and services	9.3712e+08	9.70043e+08	1.026e+09	1.18338e+09	1.74043e+09	1.85509e+09	1.89207e+09	2.15519e+09	2.01903e+09	2.54168e+09	2.42808e+09	2.4923e+09	2.36213e+09	2.82407e+09
Ethiopia (Former)	Exports of goods and services
Fiji	Exports of goods and services	1.4949e+09	1.46834e+09	1.46489e+09	1.549e+09	1.47338e+09	1.5196e+09	1.43267e+09	1.41451e+09	1.59717e+09	1.49337e+09	1.74305e+09	1.87747e+09	1.75106e+09	1.90497e+09
Finland	Exports of goods and services	6.82771e+10	6.91801e+10	7.17185e+10	7.08501e+10	7.69833e+10	8.22949e+10	9.06305e+10	9.88463e+10	1.05355e+11	8.41898e+10	8.93915e+10	9.11666e+10	9.22191e+10	9.06071e+10
France	Exports of goods and services	5.14766e+11	5.29512e+11	5.39626e+11	5.33853e+11	5.61164e+11	5.8107e+11	6.1382e+11	6.31196e+11	6.33476e+11	5.62103e+11	6.12783e+11	6.54937e+11	6.61958e+11	6.76379e+11
French Polynesia	Exports of goods and services	1.47856e+09	1.32261e+09	1.20627e+09	1.10178e+09	1.1373e+09	1.1668e+09	1.15305e+09	1.21162e+09	1.1607e+09	1.00388e+09	1.1281e+09	1.0981e+09	1.0846e+09	1.10476e+09
Gabon	Exports of goods and services	5.86772e+09	5.52823e+09	5.1379e+09	5.51278e+09	5.65997e+09	5.74821e+09	5.31808e+09	5.51511e+09	5.16485e+09	4.52982e+09	4.89673e+09	5.31658e+09	5.05626e+09	5.02206e+09
Gambia	Exports of goods and services	2.53346e+08	2.24616e+08	2.61296e+08	4.01187e+07	4.16751e+07	4.27402e+07	9.33972e+06	4.62064e+07	3.27804e+07	7.57176e+07	8.10352e+07	1.4125e+08	1.66647e+08	1.65279e+08
Georgia	Exports of goods and services	1.03504e+09	1.15397e+09	1.45437e+09	1.75933e+09	1.84594e+09	2.16358e+09	2.30471e+09	2.4583e+09	2.30678e+09	2.3065e+09	2.88021e+09	3.20086e+09	3.57768e+09	4.32394e+09
Germany	Exports of goods and services	8.08894e+11	8.55063e+11	8.91415e+11	9.08397e+11	1.01241e+12	1.07981e+12	1.21248e+12	1.32538e+12	1.35112e+12	1.15835e+12	1.32671e+12	1.43298e+12	1.47331e+12	1.49653e+12
Ghana	Exports of goods and services	6.80234e+09	4.39624e+09	4.09954e+09	4.3214e+09	3.64522e+09	3.93303e+09	5.11406e+09	6.04317e+09	7.05496e+09	7.94187e+09	9.46061e+09	1.23118e+10	1.34797e+10	1.73376e+10
Greece	Exports of goods and services	4.65939e+10	4.68546e+10	4.34302e+10	4.31153e+10	5.10996e+10	5.28205e+10	5.55749e+10	6.14627e+10	6.36134e+10	5.18661e+10	5.42678e+10	5.42678e+10	5.48919e+10	5.60711e+10
Greenland	Exports of goods and services	5.65411e+08	5.5375e+08	5.74605e+08	5.24604e+08	5.91138e+08	6.08147e+08	6.04811e+08	5.84968e+08	6.32326e+08	5.61122e+08	6.30992e+08	6.2047e+08	5.90004e+08	5.62857e+08
Grenada	Exports of goods and services	2.52476e+08	2.06707e+08	1.80331e+08	1.87701e+08	2.02614e+08	1.4887e+08	1.55086e+08	1.95684e+08	1.79932e+08	1.62054e+08	1.5829e+08	1.66602e+08	1.58694e+08	1.60346e+08
Guatemala	Exports of goods and services	6.69086e+09	6.42364e+09	6.46927e+09	6.43579e+09	6.96461e+09	6.81769e+09	7.1443e+09	7.81701e+09	7.80427e+09	7.59658e+09	8.06256e+09	8.30507e+09	8.45072e+09	8.89509e+09
Guinea	Exports of goods and services	8.14931e+08	8.88275e+08	8.94493e+08	9.49951e+08	9.11003e+08	9.42889e+08	1.08899e+09	1.08329e+09	1.14275e+09	1.10161e+09	1.23264e+09	1.54326e+09	1.54172e+09	1.43997e+09
Guinea-Bissau	Exports of goods and services	9.69305e+07	1.03421e+08	8.28544e+07	7.5375e+07	8.26582e+07	9.47659e+07	8.48748e+07	1.39696e+08	1.46189e+08	1.60192e+08	1.63176e+08	2.17568e+08	1.52165e+08	1.86291e+08
Guyana	Exports of goods and services	5.0743e+08	5.39412e+08	7.63204e+08	7.46693e+08	8.14665e+08	7.06249e+08	7.28523e+08	7.13706e+08	7.88356e+08	7.1682e+08	8.15757e+08	9.45636e+08	1.05156e+09	9.79165e+08
Haiti	Exports of goods and services	5.16947e+08	5.05713e+08	4.95181e+08	5.33097e+08	5.46613e+08	5.82597e+08	6.2455e+08	6.06294e+08	6.88795e+08	8.42036e+08	8.85218e+08	1.06532e+09	1.08761e+09	1.14185e+09
Honduras	Exports of goods and services	3.88382e+09	4.03764e+09	4.44183e+09	4.82951e+09	5.4671e+09	5.75721e+09	5.84665e+09	5.99498e+09	6.04653e+09	5.08531e+09	5.88293e+09	6.37486e+09	6.74383e+09	6.75781e+09
Hungary	Exports of goods and services	4.3378e+10	4.7215e+10	4.99327e+10	5.30701e+10	6.25969e+10	7.06619e+10	8.44698e+10	9.80811e+10	1.04852e+11	9.28916e+10	1.03409e+11	1.10196e+11	1.08579e+11	1.14939e+11
Iceland	Exports of goods and services	3.96453e+09	4.23026e+09	4.37388e+09	4.41298e+09	4.77426e+09	5.1115e+09	4.86713e+09	6.02559e+09	6.19264e+09	6.70432e+09	6.82491e+09	7.05866e+09	7.33053e+09	7.83982e+09
India	Exports of goods and services	7.27627e+10	7.58985e+10	9.19017e+10	1.00708e+11	1.28077e+11	1.61471e+11	1.94339e+11	2.05856e+11	2.35906e+11	2.24852e+11	2.69131e+11	3.10852e+11	3.26308e+11	3.53861e+11
Indonesia	Exports of goods and services	6.98846e+10	7.03353e+10	6.94794e+10	7.35692e+10	8.35219e+10	9.73876e+10	1.06547e+11	1.1565e+11	1.26675e+11	1.144e+11	1.31865e+11	1.49862e+11	1.52865e+11	1.60972e+11
Iran (Islamic Republic of)	Exports of goods and services	5.42969e+10	5.32889e+10	5.77577e+10	6.50061e+10	6.49321e+10	6.83963e+10	7.38937e+10	7.27099e+10	7.24873e+10	7.71309e+10	8.58117e+10	9.10116e+10	7.89414e+10	8.28922e+10
Iraq	Exports of goods and services	3.32187e+10	2.86063e+10	2.85775e+10	2.50936e+10	2.73434e+10	2.71494e+10	2.42219e+10	2.20472e+10	2.6279e+10	2.1248e+10	2.24748e+10	2.78293e+10	3.06084e+10	2.86936e+10
Ireland	Exports of goods and services	1.27011e+11	1.38729e+11	1.45485e+11	1.46495e+11	1.57546e+11	1.64814e+11	1.73422e+11	1.88732e+11	1.87036e+11	1.79576e+11	1.90656e+11	2.01112e+11	2.10545e+11	2.1292e+11
Israel	Exports of goods and services	5.02768e+10	4.43679e+10	4.33834e+10	4.68674e+10	5.50718e+10	5.75343e+10	6.06988e+10	6.6999e+10	7.11328e+10	6.28283e+10	7.17462e+10	7.70057e+10	7.77119e+10	7.82351e+10
Italy	Exports of goods and services	4.22439e+11	4.33737e+11	4.21622e+11	4.16141e+11	4.41782e+11	4.567e+11	4.94274e+11	5.24797e+11	5.08572e+11	4.16772e+11	4.6589e+11	4.90051e+11	4.99728e+11	5.02678e+11
Jamaica	Exports of goods and services	4.03457e+09	3.74641e+09	3.47451e+09	4.02534e+09	4.18287e+09	3.96608e+09	4.64103e+09	4.6608e+09	4.79592e+09	3.9444e+09	3.65022e+09	3.5949e+09	3.49269e+09	3.51312e+09
Japan	Exports of goods and services	4.91714e+11	4.57527e+11	4.93649e+11	5.4045e+11	6.15945e+11	6.54356e+11	7.1936e+11	7.8194e+11	7.9302e+11	6.01143e+11	7.47598e+11	7.44943e+11	7.43708e+11	7.55567e+11
Jordan	Exports of goods and services	4.3186e+09	4.5353e+09	5.36472e+09	5.63614e+09	6.45677e+09	6.63498e+09	7.45391e+09	7.62524e+09	6.70603e+09	6.46113e+09	8.02155e+09	7.61929e+09	7.36067e+09	8.09919e+09
Kazakhstan	Exports of goods and services	2.19693e+10	2.15762e+10	2.51607e+10	2.7038e+10	3.00697e+10	3.03866e+10	3.14352e+10	3.43945e+10	3.42452e+10	2.98847e+10	3.09202e+10	3.09424e+10	3.21994e+10	3.18559e+10
Kenya	Exports of goods and services	3.47039e+09	3.5984e+09	3.8545e+09	4.13243e+09	4.65291e+09	5.08908e+09	5.2453e+09	5.56828e+09	5.70035e+09	5.40284e+09	5.87529e+09	6.41638e+09	6.40262e+09	6.35024e+09
Kiribati	Exports of goods and services	1.41001e+07	1.66827e+07	1.94617e+07	1.79669e+07	1.2418e+07	1.58006e+07	1.20606e+07	1.90442e+07	1.58954e+07	1.62965e+07	1.21142e+07	1.38219e+07	1.20736e+07	1.3345e+07
Kosovo	Exports of goods and services	6.06288e+08	5.77319e+08	4.49026e+08	3.80741e+08	3.8281e+08	4.13869e+08	5.23181e+08	6.03779e+08	6.04773e+08	6.77874e+08	7.65884e+08	8.29348e+08	8.35766e+08	8.64625e+08
Kuwait	Exports of goods and services	3.82378e+10	3.79861e+10	3.34449e+10	4.39436e+10	4.75192e+10	5.16918e+10	5.5697e+10	5.55554e+10	5.67831e+10	5.31806e+10	5.2916e+10	6.00304e+10	6.43827e+10	6.25637e+10
Kyrgyzstan	Exports of goods and services	8.52231e+08	8.2463e+08	8.91255e+08	9.38397e+08	1.05865e+09	9.42411e+08	1.02625e+09	1.2915e+09	1.4091e+09	1.39386e+09	1.23077e+09	1.42426e+09	1.1505e+09	1.38118e+09
Lao People's DR	Exports of goods and services	5.47252e+08	5.49149e+08	5.76483e+08	5.00019e+08	5.34845e+08	7.01208e+08	9.00801e+08	8.27705e+08	8.28238e+08	8.58817e+08	1.07273e+09	1.21231e+09	1.27855e+09	1.38096e+09
Latvia	Exports of goods and services	4.40954e+09	4.80805e+09	5.04998e+09	5.2509e+09	5.97192e+09	7.37543e+09	7.92764e+09	9.01829e+09	9.23221e+09	8.04263e+09	9.12372e+09	1.02228e+10	1.12224e+10	1.13888e+10
Lebanon	Exports of goods and services	4.28539e+09	5.00534e+09	5.63101e+09	6.03081e+09	7.65913e+09	8.01592e+09	7.74017e+09	8.63433e+09	9.34139e+09	1.0254e+10	1.12755e+10	1.09551e+10	1.07794e+10	1.12581e+10
Lesotho	Exports of goods and services	3.17697e+08	4.38546e+08	5.92543e+08	6.91878e+08	7.29548e+08	6.68785e+08	7.53831e+08	7.86292e+08	8.68839e+08	8.31804e+08	8.9399e+08	9.21378e+08	9.12366e+08	9.51888e+08
Liberia	Exports of goods and services	141432953	188685827	311182429	535586292	146941316	144807196	212579607	246783887	303746544	151386206	210448431	319563706	406844050	357882826
Libya	Exports of goods and services	2.4059e+10	2.05344e+10	2.3728e+10	2.8413e+10	3.06576e+10	3.16693e+10	3.49313e+10	3.67128e+10	3.73002e+10	3.73002e+10	3.87922e+10	1.50187e+10	3.07511e+10	2.57461e+10
Liechtenstein	Exports of goods and services	1.91965e+09	1.87812e+09	1.81937e+09	1.76588e+09	1.93815e+09	1.97342e+09	2.33905e+09	2.73422e+09	2.70126e+09	2.22359e+09	2.61768e+09	2.58792e+09	2.62252e+09	3.0242e+09
Lithuania	Exports of goods and services	7.42282e+09	8.99714e+09	1.06716e+10	1.15708e+10	1.20444e+10	1.40954e+10	1.58757e+10	1.6377e+10	1.85673e+10	1.61928e+10	1.92601e+10	2.21257e+10	2.48235e+10	2.71655e+10
Luxembourg	Exports of goods and services	4.61671e+10	4.8804e+10	4.99458e+10	5.13642e+10	5.69002e+10	6.00284e+10	6.75223e+10	7.27069e+10	7.80273e+10	6.81351e+10	7.36994e+10	7.737e+10	7.96491e+10	8.41182e+10
Madagascar	Exports of goods and services	1.53632e+09	1.6837e+09	9.11173e+08	1.26742e+09	1.3913e+09	1.4217e+09	1.62961e+09	2.21146e+09	2.05888e+09	1.82664e+09	1.88398e+09	2.03034e+09	2.06737e+09	2.96461e+09
Malawi	Exports of goods and services	3.4624e+08	4.13177e+08	4.09257e+08	5.95966e+08	6.12685e+08	6.16453e+08	6.29038e+08	7.90664e+08	7.47339e+08	8.48771e+08	8.29156e+08	8.67523e+08	8.19595e+08	9.52191e+08
Malaysia	Exports of goods and services	1.24843e+11	1.16316e+11	1.22628e+11	1.28924e+11	1.49627e+11	1.62049e+11	1.72877e+11	1.79401e+11	1.82223e+11	1.624e+11	1.80453e+11	1.88745e+11	1.88554e+11	1.88003e+11
Maldives	Exports of goods and services	6.61353e+08	6.62667e+08	7.72493e+08	9.11736e+08	1.01835e+09	7.71665e+08	1.13878e+09	1.23318e+09	1.34038e+09	1.26101e+09	1.47797e+09	1.71142e+09	1.825e+09	2.30104e+09
Mali	Exports of goods and services	9.39987e+08	1.07277e+09	1.29025e+09	1.30349e+09	1.22252e+09	1.37321e+09	1.39106e+09	1.39802e+09	1.21684e+09	1.22889e+09	1.30263e+09	1.34431e+09	1.43841e+09	1.54629e+09
Malta	Exports of goods and services	6.42347e+09	6.16791e+09	6.55726e+09	6.53476e+09	6.39737e+09	6.67259e+09	7.84095e+09	8.69292e+09	1.03802e+10	1.03346e+10	1.10459e+10	1.12474e+10	1.19612e+10	1.17692e+10
Marshall Islands	Exports of goods and services	1.42976e+07	1.47989e+07	1.54425e+07	1.59235e+07	1.69886e+07	17328866	1.74815e+07	1.77177e+07	1.79719e+07	1.76437e+07	1.86773e+07	1.87896e+07	1.93924e+07	1.95509e+07
Mauritania	Exports of goods and services	7.00718e+08	7.41399e+08	6.71567e+08	5.32782e+08	6.71126e+08	6.71152e+08	1.09761e+09	1.05744e+09	1.03932e+09	1.06204e+09	1.0879e+09	1.00303e+09	1.10395e+09	1.22097e+09
Mauritius	Exports of goods and services	3.46092e+09	3.98712e+09	3.51466e+09	3.45469e+09	3.37304e+09	3.82995e+09	4.01332e+09	4.08671e+09	4.24676e+09	4.0949e+09	4.68084e+09	4.92074e+09	5.08738e+09	5.31242e+09
Mexico	Exports of goods and services	1.98657e+11	1.91513e+11	1.94275e+11	1.99508e+11	2.17728e+11	2.30169e+11	2.47819e+11	2.56856e+11	2.53393e+11	2.2354e+11	2.69469e+11	2.91609e+11	3.08858e+11	3.13187e+11
Micronesia (FS of)	Exports of goods and services	4.34895e+07	4.76201e+07	4.49504e+07	4.73781e+07	3.80807e+07	41837074	4.51944e+07	5.51542e+07	5.59589e+07	5.31174e+07	5.87796e+07	6.15988e+07	7.17854e+07	6.20675e+07
Monaco	Exports of goods and services	1.09082e+09	1.09717e+09	1.07932e+09	1.03066e+09	1.07172e+09	1.10827e+09	1.2087e+09	1.38041e+09	1.40148e+09	1.08572e+09	1.20023e+09	1.36672e+09	1.39342e+09	1.53364e+09
Mongolia	Exports of goods and services	8.44159e+08	9.18289e+08	1.05191e+09	1.16452e+09	1.40077e+09	1.48303e+09	1.57405e+09	1.7189e+09	1.84409e+09	2.20823e+09	2.35732e+09	3.02029e+09	2.93872e+09	3.34786e+09
Montenegro	Exports of goods and services	4.81627e+08	5.72701e+08	6.5321e+08	5.56347e+08	8.16407e+08	9.82955e+08	1.13944e+09	1.16767e+09	1.14374e+09	8.87519e+08	9.54018e+08	1.14652e+09	1.13261e+09	1.11787e+09
Montserrat	Exports of goods and services	2.10122e+07	1.93345e+07	1.83978e+07	1.62252e+07	2.17187e+07	1.66778e+07	1.55661e+07	1.65933e+07	1.64607e+07	1.31895e+07	1.08958e+07	1.14512e+07	1.25268e+07	1.77965e+07
Morocco	Exports of goods and services	1.32829e+10	1.5024e+10	1.58734e+10	1.59754e+10	1.69776e+10	1.92344e+10	2.14695e+10	2.25837e+10	2.42241e+10	2.06474e+10	2.40793e+10	2.459e+10	2.52347e+10	2.58281e+10
Mozambique	Exports of goods and services	7.31101e+08	1.09983e+09	1.52132e+09	1.80971e+09	2.19432e+09	2.33187e+09	2.61716e+09	3.03409e+09	3.24612e+09	3.57174e+09	3.66705e+09	3.99943e+09	4.51732e+09	4.74295e+09
Myanmar	Exports of goods and services	2.7763e+09	3.08294e+09	3.79091e+09	2.84242e+09	3.28481e+09	3.40365e+09	4.26337e+09	4.12931e+09	3.4889e+09	3.4174e+09	3.79157e+09	3.2432e+09	3.45246e+09	3.9608e+09
Namibia	Exports of goods and services	2.2824e+09	2.22139e+09	2.58204e+09	2.81055e+09	2.96168e+09	2.9371e+09	3.38784e+09	3.60383e+09	3.47842e+09	3.54233e+09	3.38019e+09	3.37143e+09	3.72192e+09	4.16699e+09
Nauru	Exports of goods and services	4.79334e+06	5.55211e+06	5.8141e+06	5.16539e+06	3.47566e+06	4.34174e+06	2.46072e+06	2.9833e+06	4.52536e+06	5.72071e+06	5.7422e+06	6.67542e+06	6.06491e+06	9.26021e+06
Nepal	Exports of goods and services	1.57493e+09	1.51208e+09	1.16145e+09	1.10632e+09	1.24215e+09	1.20444e+09	1.18887e+09	1.17763e+09	1.1862e+09	1.23213e+09	1.10351e+09	1.08018e+09	1.10088e+09	1.18661e+09
Netherlands	Exports of goods and services	3.82185e+11	3.86062e+11	3.88172e+11	3.91964e+11	4.2311e+11	4.46515e+11	4.79598e+11	5.13521e+11	5.20976e+11	4.79112e+11	5.21664e+11	5.44638e+11	5.62515e+11	5.73931e+11
Netherlands Antilles (former)	Exports of goods and services	2.26356e+09	2.30138e+09	2.24545e+09	2.25033e+09	2.42475e+09	2.48324e+09	2.62055e+09	2.65609e+09	2.82873e+09	2.76528e+09	2.75669e+09	2.7812e+09	2.77509e+09
New Caledonia	Exports of goods and services	1.20455e+09	1.00902e+09	9.98166e+08	1.19417e+09	1.32389e+09	1.33872e+09	1.57494e+09	1.88163e+09	1.28243e+09	1.0893e+09	1.50152e+09	1.59167e+09	1.44535e+09	1.58807e+09
New Zealand	Exports of goods and services	2.77014e+10	2.86127e+10	3.07704e+10	3.15969e+10	3.25955e+10	3.24494e+10	3.35788e+10	3.48841e+10	3.39342e+10	3.53078e+10	3.63038e+10	3.71348e+10	3.82617e+10	3.83724e+10
Nicaragua	Exports of goods and services	1.08095e+09	1.16039e+09	1.11964e+09	1.22239e+09	1.43149e+09	1.54127e+09	1.73385e+09	1.92564e+09	2.09935e+09	2.11614e+09	2.37436e+09	2.5654e+09	2.90996e+09	3.00136e+09
Niger	Exports of goods and services	5.97514e+08	6.09901e+08	5.61345e+08	5.67383e+08	5.92472e+08	6.31447e+08	6.66398e+08	6.84391e+08	7.87895e+08	9.29605e+08	1.11301e+09	1.10294e+09	1.40306e+09	1.42319e+09
Nigeria	Exports of goods and services	2.96513e+10	2.26478e+10	2.52811e+10	3.32096e+10	3.28925e+10	3.69628e+10	6.29756e+10	4.87672e+10	6.27953e+10	4.3516e+10	6.68185e+10	8.40529e+10	8.10362e+10	4.39439e+10
Norway	Exports of goods and services	1.27092e+11	1.32612e+11	1.3225e+11	1.321e+11	1.33459e+11	1.34064e+11	1.32983e+11	1.34793e+11	1.34971e+11	1.29436e+11	1.3029e+11	1.29282e+11	1.31148e+11	1.27249e+11
Oman	Exports of goods and services	1.58039e+10	1.67107e+10	1.59017e+10	1.54665e+10	1.51652e+10	1.81144e+10	1.47383e+10	1.44615e+10	1.57815e+10	1.5572e+10	1.79025e+10	1.96526e+10	1.93754e+10	2.07e+10
Pakistan	Exports of goods and services	1.00266e+10	1.12481e+10	1.23684e+10	1.58783e+10	1.56357e+10	1.71352e+10	1.88308e+10	1.9115e+10	1.82449e+10	1.76317e+10	2.04012e+10	2.08851e+10	1.76982e+10	1.98616e+10
Palau	Exports of goods and services	1.41054e+07	7.8649e+07	8.57399e+07	8.88066e+07	9.56803e+07	115705024	1.19896e+08	1.1588e+08	1.17472e+08	1.07401e+08	9.99814e+07	1.14495e+08	1.13345e+08	1.13569e+08
Panama	Exports of goods and services	1.00532e+10	1.00871e+10	9.83557e+09	8.84631e+09	1.04872e+10	11674200000	1.29643e+10	1.58175e+10	1.86383e+10	1.84527e+10	1.87504e+10	2.30308e+10	2.53681e+10	2.46286e+10
Papua New Guinea	Exports of goods and services	2.64836e+09	2.92471e+09	2.88796e+09	3.29988e+09	3.39444e+09	3.62536e+09	3.63954e+09	3.68434e+09	3.76365e+09	3.36089e+09	3.43845e+09	3.24197e+09	3.04425e+09	3.03949e+09
Paraguay	Exports of goods and services	2.66711e+09	2.25552e+09	3.71871e+09	4.21319e+09	4.55842e+09	5.08381e+09	5.23383e+09	5.71898e+09	5.76854e+09	5.2945e+09	6.34732e+09	6.74254e+09	6.28945e+09	7.47952e+09
Peru	Exports of goods and services	1.27387e+10	1.36049e+10	1.4669e+10	1.55976e+10	1.78928e+10	2.04266e+10	2.06682e+10	2.2045e+10	2.37605e+10	2.30099e+10	2.37347e+10	2.63138e+10	2.7342e+10	2.64939e+10
Philippines	Exports of goods and services	3.95074e+10	3.67159e+10	3.84277e+10	4.0161e+10	4.52856e+10	4.75282e+10	5.35156e+10	5.71267e+10	5.55983e+10	5.12438e+10	6.19899e+10	6.02563e+10	6.5597e+10	6.48766e+10
Poland	Exports of goods and services	7.48915e+10	7.72265e+10	8.0952e+10	9.23662e+10	9.68862e+10	1.06314e+11	1.2293e+11	1.35452e+11	1.44952e+11	1.35845e+11	1.5332e+11	1.65384e+11	1.72538e+11	1.81115e+11
Portugal	Exports of goods and services	4.61527e+10	4.71926e+10	4.86457e+10	5.02485e+10	5.24915e+10	5.27466e+10	5.9272e+10	6.36066e+10	6.34013e+10	5.693e+10	6.23505e+10	6.67374e+10	6.87739e+10	7.31976e+10
Puerto Rico	Exports of goods and services	5.90726e+10	5.76303e+10	6.42626e+10	6.65682e+10	6.84081e+10	72624900000	6.68752e+10	6.60208e+10	6.36639e+10	6.11996e+10	6.06332e+10	5.60791e+10	5.46697e+10	5.63313e+10
Qatar	Exports of goods and services	2.12178e+10	2.00686e+10	2.10308e+10	1.92824e+10	2.62586e+10	2.89826e+10	3.37285e+10	3.83971e+10	4.43135e+10	4.52365e+10	5.75854e+10	7.00533e+10	8.00539e+10	7.9329e+10
Republic of Korea	Exports of goods and services	2.02088e+11	1.9747e+11	2.23203e+11	2.54211e+11	3.06634e+11	3.30601e+11	3.70551e+11	4.1745e+11	4.48743e+11	4.47282e+11	5.04075e+11	5.80362e+11	6.09879e+11	6.35893e+11
Republic of Moldova	Exports of goods and services	7.2262e+08	8.46959e+08	1.0076e+09	1.20123e+09	1.33342e+09	1.52894e+09	1.54568e+09	1.70814e+09	1.76629e+09	1.55265e+09	1.76579e+09	2.24978e+09	2.28799e+09	2.53168e+09
Romania	Exports of goods and services	1.87981e+10	2.10722e+10	2.46184e+10	2.6736e+10	3.0493e+10	3.28095e+10	3.62128e+10	3.90534e+10	3.78205e+10	3.58095e+10	4.1263e+10	4.61677e+10	4.6625e+10	5.66361e+10
Russian Federation	Exports of goods and services	1.74568e+11	1.81931e+11	2.00602e+11	2.25957e+11	2.52638e+11	2.68956e+11	2.88654e+11	3.06749e+11	3.08562e+11	2.93947e+11	3.14664e+11	3.15649e+11	3.19941e+11	3.33314e+11
Rwanda	Exports of goods and services	1.13542e+08	1.6498e+08	1.73409e+08	2.08929e+08	2.75289e+08	3.06024e+08	3.15178e+08	3.52025e+08	4.92081e+08	3.69049e+08	3.89631e+08	5.75404e+08	6.50973e+08	7.83759e+08
Saint Kitts and Nevis	Exports of goods and services	1.65708e+08	1.57268e+08	1.64773e+08	2.01915e+08	1.90849e+08	2.26658e+08	2.10712e+08	1.98437e+08	1.94906e+08	1.40245e+08	1.62142e+08	1.83957e+08	1.84333e+08	2.25356e+08
Saint Lucia	Exports of goods and services	5.10084e+08	4.56615e+08	4.6997e+08	4.84482e+08	5.07176e+08	5.24915e+08	5.01297e+08	4.64099e+08	5.53557e+08	5.65611e+08	5.97875e+08	5.50372e+08	5.39882e+08	5.3764e+08
Samoa	Exports of goods and services	1.02794e+08	1.14047e+08	1.16215e+08	1.16343e+08	1.2197e+08	1.29889e+08	1.31887e+08	1.41393e+08	1.37437e+08	1.36868e+08	1.38503e+08	1.41725e+08	1.45227e+08	1.48084e+08
San Marino	Exports of goods and services	3.49018e+09	3.51423e+09	3.38675e+09	3.50942e+09	3.85579e+09	3.90631e+09	4.34168e+09	4.60867e+09	4.88327e+09	4.00649e+09	3.63923e+09	3.0742e+09	2.77203e+09	2.75744e+09
Sao Tome and Principe	Exports of goods and services	1.66383e+07	1.66027e+07	2.01243e+07	1.89718e+07	1.70268e+07	1.6e+07	1.63458e+07	1.28839e+07	1.39487e+07	1.33973e+07	1.76175e+07	1.73885e+07	1.71624e+07	1.89043e+07
Saudi Arabia	Exports of goods and services	1.45554e+11	1.43909e+11	1.33222e+11	1.58877e+11	1.73371e+11	1.87389e+11	2.04321e+11	2.09855e+11	2.00973e+11	1.8634e+11	1.95091e+11	2.12075e+11	2.20007e+11	2.2025e+11
Senegal	Exports of goods and services	1.92709e+09	1.95609e+09	2.0262e+09	2.15893e+09	2.3052e+09	2.35241e+09	2.27604e+09	2.27417e+09	2.31617e+09	2.4597e+09	2.59982e+09	2.80634e+09	2.75342e+09	3.21968e+09
Serbia	Exports of goods and services	2.87608e+09	4.20956e+09	4.73335e+09	5.6084e+09	6.33339e+09	7.12502e+09	8.43194e+09	8.90239e+09	9.7381e+09	9.06779e+09	1.0429e+10	1.09507e+10	1.10384e+10	1.33867e+10
Seychelles	Exports of goods and services	7.00367e+08	7.60195e+08	7.15364e+08	7.64891e+08	6.24029e+08	7.19675e+08	8.48359e+08	7.86854e+08	7.26928e+08	7.83418e+08	6.77425e+08	6.58391e+08	6.68231e+08	7.97328e+08
Sierra Leone	Exports of goods and services	9.65652e+07	1.10595e+08	1.5159e+08	2.41963e+08	2.69994e+08	2.90043e+08	3.08709e+08	3.09111e+08	2.62359e+08	2.8337e+08	3.36752e+08	3.32465e+08	7.26109e+08	1.71843e+09
Singapore	Exports of goods and services	1.81705e+11	1.75214e+11	1.88456e+11	2.15127e+11	2.56195e+11	2.8808e+11	3.18825e+11	3.47638e+11	3.62725e+11	3.369e+11	3.98639e+11	4.10425e+11	4.16172e+11	4.31168e+11
Sint Maarten (Dutch part)	Exports of goods and services						8.98994e+08	8.62514e+08	9.05196e+08	8.68492e+08	8.13128e+08	8.35084e+08	8.93799e+08	9.95475e+08	9.25982e+08
Slovakia	Exports of goods and services	1.84435e+10	2.04051e+10	2.18411e+10	2.58586e+10	3.12519e+10	3.52771e+10	4.33623e+10	4.96943e+10	5.11947e+10	4.24812e+10	4.91456e+10	5.50503e+10	6.01937e+10	6.33144e+10
Slovenia	Exports of goods and services	1.44334e+10	1.54701e+10	1.66742e+10	1.72012e+10	1.94445e+10	2.16543e+10	2.47123e+10	2.80756e+10	2.92456e+10	2.43944e+10	2.68622e+10	2.87481e+10	2.88354e+10	2.95963e+10
Solomon Islands	Exports of goods and services	1.11046e+08	7.60603e+07	9.01428e+07	1.18679e+08	1.27995e+08	1.41437e+08	1.45593e+08	1.68247e+08	1.82898e+08	1.56338e+08	2.12523e+08	2.87118e+08	3.47195e+08	3.26847e+08
Somalia	Exports of goods and services	6.81699e+06	6.61927e+06	6.61927e+06	7.02305e+06	7.17053e+06	7.27809e+06	7.56194e+06	7.72074e+06	8.06817e+06	8.60067e+06	8.54907e+06	8.83974e+06	9.11936e+06	9.29841e+06
South Africa	Exports of goods and services	5.89864e+10	6.03978e+10	6.09953e+10	6.1062e+10	6.27922e+10	6.8172e+10	7.32594e+10	7.89944e+10	8.02186e+10	6.65624e+10	7.16997e+10	7.48143e+10	7.48969e+10	7.83312e+10
South Sudan	Exports of goods and services									7.57748e+09	8.39915e+09	8.26755e+09	8.09651e+09	6.57047e+08	1.31114e+09
Spain	Exports of goods and services	2.47556e+11	2.56655e+11	2.60163e+11	2.69058e+11	2.80499e+11	2.85467e+11	2.99555e+11	3.24281e+11	3.21534e+11	2.86091e+11	3.13051e+11	3.36201e+11	3.40143e+11	3.54751e+11
Sri Lanka	Exports of goods and services	6.98582e+09	6.42696e+09	6.64548e+09	6.86852e+09	7.40038e+09	7.89222e+09	8.19532e+09	8.79582e+09	8.83014e+09	7.74352e+09	8.42186e+09	9.34827e+09	9.36323e+09	9.91567e+09
St. Vincent and the Grenadines	Exports of goods and services	2.00033e+08	1.89206e+08	1.87899e+08	1.85087e+08	1.89955e+08	2.00544e+08	2.05797e+08	1.90017e+08	1.8816e+08	1.73669e+08	1.58341e+08	1.58415e+08	1.61046e+08	1.64904e+08
State of Palestine	Exports of goods and services	9.0279e+08	6.0542e+08	4.93803e+08	5.55105e+08	6.12813e+08	723300000	7.01737e+08	8.33274e+08	9.76927e+08	1.04234e+09	1.05928e+09	1.33314e+09	1.32502e+09	1.37359e+09
Sudan	Exports of goods and services									1.38658e+09	5.21876e+08	2.06432e+09	1.39904e+09	1.29046e+09	1.59396e+09
Sudan (Former)	Exports of goods and services	3.01532e+09	3.29695e+09	3.80938e+09	3.88138e+09	4.34723e+09	4.93765e+09	4.87407e+09	7.39588e+09	8.96406e+09	8.20116e+09	1.0723e+10
Suriname	Exports of goods and services	8.45154e+08	8.09128e+08	6.68673e+08	7.5262e+08	9.64069e+08	1.12605e+09	1.22341e+09	1.31949e+09	1.44484e+09	1.15407e+09	1.4452e+09	1.48213e+09	1.4699e+09	1.56505e+09
Swaziland	Exports of goods and services	1.73049e+09	2.00452e+09	2.29424e+09	2.474e+09	2.14188e+09	2.24988e+09	2.04522e+09	1.80485e+09	1.68599e+09	1.68207e+09	1.54638e+09	1.90921e+09	1.71822e+09	1.75596e+09
Sweden	Exports of goods and services	1.42231e+11	1.43222e+11	1.45109e+11	1.51146e+11	1.67372e+11	1.78467e+11	1.93926e+11	2.02611e+11	2.06635e+11	1.76703e+11	1.97806e+11	2.09875e+11	2.11935e+11	2.10798e+11
Switzerland	Exports of goods and services	1.94138e+11	1.94108e+11	1.90196e+11	1.88345e+11	2.06326e+11	2.1984e+11	2.33654e+11	2.60207e+11	2.70256e+11	2.43295e+11	2.74548e+11	2.88025e+11	2.90294e+11	3.34696e+11
Syrian Arab Republic	Exports of goods and services	1.0143e+10	1.14578e+10	1.24586e+10	9.55301e+09	1.18321e+10	1.16548e+10	1.40515e+10	1.42499e+10	1.39276e+10	1.12842e+10	1.25466e+10	1.10411e+10	5.73031e+09	3.06571e+09
Tajikistan	Exports of goods and services	9.01173e+08	7.13831e+08	7.68333e+08	9.95077e+08	1.21991e+09	1.25481e+09	1.64649e+09	2.10555e+09	1.81122e+09	1.77498e+09	2.18324e+09	2.20619e+09	2.22828e+09	2.35162e+09
TFYR of Macedonia	Exports of goods and services	1.92449e+09	1.65133e+09	1.57107e+09	1.57633e+09	1.84728e+09	2.17847e+09	2.44281e+09	2.77968e+09	2.64993e+09	2.28184e+09	2.82218e+09	3.27762e+09	3.3416e+09	3.24509e+09
Thailand	Exports of goods and services	9.07039e+10	9.07202e+10	9.60611e+10	1.04835e+11	1.20174e+11	1.29499e+11	1.43469e+11	1.56229e+11	1.66014e+11	1.45188e+11	1.65709e+11	1.80923e+11	1.90108e+11	1.98121e+11
Timor-Leste	Exports of goods and services	2.36025e+08	1.37813e+08	1.33378e+08	1.39316e+08	8.33042e+08	1469511427	2.66019e+09	2.67311e+09	2.94654e+09	2.8434e+09	2.64415e+09	2.70965e+09	2.5445e+09	2.64486e+09
Togo	Exports of goods and services	6.73209e+08	6.00026e+08	6.46609e+08	8.30915e+08	7.92579e+08	8.37211e+08	1.0054e+09	8.22487e+08	9.54424e+08	9.06737e+08	1.01253e+09	1.31472e+09	1.66324e+09	1.78075e+09
Tonga	Exports of goods and services	4.42167e+07	3.69499e+07	5.00935e+07	5.39615e+07	4.79344e+07	4.65766e+07	4.27557e+07	3.75455e+07	3.98506e+07	3.83981e+07	3.54614e+07	4.2882e+07	4.31662e+07	5.13763e+07
Trinidad and Tobago	Exports of goods and services	6.15265e+09	6.16438e+09	5.61365e+09	7.23064e+09	8.20002e+09	1.05196e+10	1.28578e+10	1.22454e+10	1.5261e+10	1.25116e+10	1.14947e+10	1.12558e+10	8.3394e+09	9.87546e+09
Tunisia	Exports of goods and services	1.22107e+10	1.36341e+10	1.31552e+10	1.31609e+10	1.38796e+10	1.45006e+10	1.51259e+10	1.69108e+10	1.73843e+10	1.61605e+10	1.78735e+10	1.71043e+10	1.78398e+10	1.71038e+10
Turkey	Exports of goods and services	7.41374e+10	7.70551e+10	8.23621e+10	8.80082e+10	9.78352e+10	1.05558e+11	1.12573e+11	1.20751e+11	1.24062e+11	1.17814e+11	1.21829e+11	1.31426e+11	1.52868e+11	1.52403e+11
Turkmenistan	Exports of goods and services	1.05681e+10	9.39787e+09	7.9933e+09	7.44884e+09	7.73884e+09	9.22683e+09	1.15085e+10	1.31769e+10	1.28415e+10	1.5866e+10	1.80734e+10	1.97953e+10	2.15696e+10	2.44178e+10
Turks and Caicos Islands	Exports of goods and services	3.17509e+08	3.33025e+08	3.1367e+08	3.16507e+08	3.4393e+08	369766000	4.33258e+08	4.53261e+08	6.13828e+08	4.63755e+08	5.16678e+08	5.15731e+08	4.97381e+08	4.99827e+08
Tuvalu	Exports of goods and services	464178	369116	337231	363294	369277	357067	440091	367213	425654	422729	343181	406576	470273	430948
U.R. of Tanzania: Mainland	Exports of goods and services	1.58389e+09	1.85545e+09	1.99838e+09	2.38756e+09	2.58674e+09	2.93706e+09	2.84101e+09	3.31937e+09	3.53695e+09	3.66147e+09	3.90919e+09	4.30437e+09	4.99511e+09	5.02723e+09
Uganda	Exports of goods and services	8.60478e+08	1.06588e+09	1.15272e+09	1.26258e+09	1.52606e+09	1.85426e+09	1.73695e+09	2.67219e+09	3.91418e+09	3.24427e+09	3.2597e+09	3.78846e+09	4.08756e+09	4.31767e+09
Ukraine	Exports of goods and services	3.39875e+10	3.32745e+10	3.573e+10	3.95238e+10	4.8503e+10	4.25935e+10	4.01407e+10	4.13277e+10	4.36858e+10	3.40871e+10	3.4875e+10	3.59664e+10	3.39918e+10	3.29865e+10
United Arab Emirates	Exports of goods and services	7.18845e+10	6.93463e+10	7.15311e+10	8.7919e+10	1.09498e+11	1.22071e+11	1.3624e+11	1.48172e+11	1.6714e+11	1.59435e+11	1.60213e+11	1.93341e+11	2.18697e+11	2.31201e+11
United Kingdom	Exports of goods and services	5.07692e+11	5.17985e+11	5.32048e+11	5.46936e+11	5.72952e+11	6.21256e+11	6.98023e+11	6.83063e+11	6.94197e+11	6.37086e+11	6.7679e+11	7.14898e+11	7.1968e+11	7.23552e+11
United States	Exports of goods and services	1.19194e+12	1.1223e+12	1.10295e+12	1.1224e+12	1.23187e+12	1308900000000	1.42716e+12	1.55941e+12	1.64886e+12	1.50386e+12	1.68274e+12	1.79802e+12	1.85655e+12	1.91311e+12
Uruguay	Exports of goods and services	3.65414e+09	3.46491e+09	3.23331e+09	3.68664e+09	4.55109e+09	5.27902e+09	5.57544e+09	5.842e+09	6.3404e+09	6.58861e+09	7.0491e+09	7.46865e+09	7.62903e+09	7.63855e+09
Uzbekistan	Exports of goods and services	2.70193e+09	3.22403e+09	3.68689e+09	4.65326e+09	5.40961e+09	5.44948e+09	5.63832e+09	6.70995e+09	7.59015e+09	6.90912e+09	6.84607e+09	7.7503e+09	7.21733e+09	7.39195e+09
Vanuatu	Exports of goods and services	1.25877e+08	1.31799e+08	1.35531e+08	1.46153e+08	1.67371e+08	1.79247e+08	1.79695e+08	1.90102e+08	2.06466e+08	2.36229e+08	2.37205e+08	2.6188e+08	2.9132e+08	2.75929e+08
Venezuela	Exports of goods and services	5.89283e+10	5.68367e+10	5.45857e+10	4.89177e+10	5.56124e+10	5.77087e+10	5.59675e+10	5.17411e+10	5.12323e+10	4.42229e+10	3.85283e+10	4.03257e+10	4.09686e+10	3.84409e+10
Viet Nam	Exports of goods and services	2.02773e+10	2.15099e+10	2.39515e+10	2.68432e+10	3.20779e+10	3.67029e+10	4.2155e+10	4.77632e+10	5.1456e+10	4.75029e+10	5.28597e+10	6.26099e+10	6.64581e+10	8.03544e+10
Yemen	Exports of goods and services	1.08953e+10	7.4798e+09	7.96654e+09	7.55942e+09	6.9865e+09	6.8458e+09	6.32579e+09	5.38973e+09	5.34188e+09	2.86971e+09	3.22262e+09	2.63681e+09	1.76498e+09	1.66376e+09
Yemen Arab Republic (Former)	Exports of goods and services
Yemen Democratic (Former)	Exports of goods and services
Yugoslavia (Former)	Exports of goods and services
Zambia	Exports of goods and services	8.71241e+08	1.14551e+09	1.37656e+09	1.69606e+09	2.35396e+09	2.48135e+09	2.6609e+09	1.8497e+09	1.77789e+09	2.38305e+09	2.27966e+09	2.45017e+09	2.72786e+09	2.82971e+09
Zanzibar	Exports of goods and services	3.24184e+07	4.50849e+07	5.05957e+07	5.65781e+07	6.3806e+07	7.08915e+07	8.1419e+07	9.32928e+07	9.61939e+07	9.52633e+07	1.10707e+08	1.33679e+08	1.4194e+08	1.2265e+08
Zimbabwe	Exports of goods and services	8.44279e+09	5.65971e+09	3.97251e+09	4.18435e+09	2.76329e+09	2087712250	2.10391e+09	1.036e+09	1.05061e+09	3.27079e+09	3.33244e+09	3.16793e+09	4.19332e+09	4.43933e+09
Afghanistan	Final consumption expenditure	4.06751e+09	3.85831e+09	5.89471e+09	7.28411e+09	7.16943e+09	8.32842e+09	8.80697e+09	9.85798e+09	1.00824e+10	1.21307e+10	1.29233e+10	1.34261e+10	1.5475e+10	1.58703e+10
Albania	Final consumption expenditure	5.29869e+09	5.36625e+09	5.75576e+09	6.26138e+09	6.82916e+09	7.20402e+09	7.45508e+09	9.07259e+09	1.02506e+10	1.03597e+10	1.05611e+10	1.0734e+10	1.0809e+10	1.09169e+10
Algeria	Final consumption expenditure	3.80354e+10	3.96035e+10	4.19723e+10	4.36732e+10	4.55794e+10	4.66578e+10	4.85981e+10	5.06038e+10	5.48983e+10	5.86803e+10	6.20056e+10	6.65134e+10	6.93385e+10	7.1823e+10
Andorra	Final consumption expenditure	1.68445e+09	1.77144e+09	1.86915e+09	2.07342e+09	2.26207e+09	2.43558e+09	2.53487e+09	2.53808e+09	2.3471e+09	2.28903e+09	2.19974e+09	2.10972e+09	2.07052e+09	2.05275e+09
Angola	Final consumption expenditure	1.40329e+10	1.60704e+10	1.70519e+10	1.87706e+10	1.92778e+10	1.93128e+10	1.88123e+10	2.58665e+10	3.22924e+10	4.03806e+10	4.17535e+10	4.33819e+10	4.56378e+10	5.0452e+10
Anguilla	Final consumption expenditure	1.63224e+08	1.57527e+08	1.60925e+08	1.69255e+08	1.88955e+08	2.05766e+08	3.13056e+08	3.06244e+08	3.09975e+08	2.51403e+08	2.35109e+08	2.46704e+08	2.31646e+08	2.21724e+08
Antigua and Barbuda	Final consumption expenditure	6.21716e+08	6.89133e+08	7.02679e+08	7.58479e+08	7.74979e+08	8.59578e+08	9.82723e+08	1.10459e+09	1.06812e+09	8.02533e+08	8.62055e+08	8.75345e+08	9.22077e+08	9.18913e+08
Argentina	Final consumption expenditure	1.61321e+11	1.5281e+11	1.32733e+11	1.423e+11	1.5451e+11	1.69216e+11	1.81576e+11	1.9774e+11	2.08585e+11	2.17124e+11	2.32651e+11	2.57157e+11	2.68732e+11	2.80706e+11
Armenia	Final consumption expenditure	2.81228e+09	3.01025e+09	3.25185e+09	3.50533e+09	3.82724e+09	4.2168e+09	4.60072e+09	5.15225e+09	5.37459e+09	5.16157e+09	5.36183e+09	5.50025e+09	5.91873e+09	6.13657e+09
Aruba	Final consumption expenditure	1.56484e+09	1.63705e+09	1.67048e+09	1.69955e+09	1.73116e+09	1.76718e+09	1.80286e+09	1.87838e+09	1.87991e+09	1.80503e+09	1.78096e+09	1.76383e+09	1.79088e+09	1.88176e+09
Australia	Final consumption expenditure	4.67515e+11	4.82003e+11	5.01111e+11	5.25734e+11	5.47747e+11	5.64997e+11	5.89767e+11	6.1544e+11	6.2206e+11	6.3556e+11	6.58366e+11	6.77217e+11	6.89699e+11	7.05452e+11
Austria	Final consumption expenditure	2.14235e+11	2.16118e+11	2.17798e+11	2.21157e+11	2.25774e+11	2.30697e+11	2.3626e+11	2.38997e+11	2.42829e+11	2.45477e+11	2.48409e+11	2.49734e+11	2.51111e+11	2.51315e+11
Azerbaijan	Final consumption expenditure	4.30215e+09	4.65352e+09	5.11643e+09	5.7295e+09	6.27002e+09	6.95955e+09	7.83334e+09	8.98136e+09	1.03635e+10	1.11887e+10	1.228e+10	1.32324e+10	1.42584e+10	1.54015e+10
Bahamas	Final consumption expenditure	5.56179e+09	5.62098e+09	5.78273e+09	5.66352e+09	5.56309e+09	5976152489	6.14179e+09	6.2058e+09	6.0687e+09	5.58152e+09	5.62791e+09	5.61117e+09	5.68735e+09	5.71303e+09
Bahrain	Final consumption expenditure	6.97721e+09	7.44721e+09	7.62557e+09	8.04424e+09	8.21005e+09	8.53544e+09	8.69501e+09	9.21027e+09	1.11119e+10	1.24077e+10	1.38255e+10	1.51298e+10	1.5911e+10	1.64861e+10
Bangladesh	Final consumption expenditure	4.22748e+10	4.42741e+10	4.67389e+10	4.86307e+10	5.03933e+10	5.24699e+10	5.4789e+10	5.80243e+10	6.11397e+10	6.47719e+10	6.82225e+10	7.24351e+10	7.56692e+10	7.95103e+10
Barbados	Final consumption expenditure	3.19573e+09	3.01231e+09	3.01503e+09	2.9668e+09	3.26185e+09	3446250000	3.46851e+09	3.46851e+09	3.33455e+09	3.18276e+09	2.98636e+09	2.89872e+09	2.69347e+09	2.67922e+09
Belarus	Final consumption expenditure	1.5661e+10	1.72963e+10	1.83563e+10	1.91255e+10	2.01516e+10	2.19848e+10	2.37577e+10	2.58425e+10	2.89092e+10	2.8904e+10	3.11036e+10	3.13268e+10	3.37412e+10	3.66613e+10
Belgium	Final consumption expenditure	2.64559e+11	2.67937e+11	2.70959e+11	2.73389e+11	2.77651e+11	2.80683e+11	2.84607e+11	2.89756e+11	2.95938e+11	2.97823e+11	3.04531e+11	3.06531e+11	3.09604e+11	3.11395e+11
Belize	Final consumption expenditure	7.99945e+08	8.73306e+08	9.39941e+08	9.76975e+08	9.73649e+08	962805878	9.42669e+08	9.84429e+08	9.74839e+08	1.01261e+09	1.06706e+09	1.10538e+09	1.14657e+09	1.20153e+09
Benin	Final consumption expenditure	3.24328e+09	3.40572e+09	3.58998e+09	3.77772e+09	3.77416e+09	3.87054e+09	3.97707e+09	4.09032e+09	4.24568e+09	4.38248e+09	4.51412e+09	4.6551e+09	4.87019e+09	5.10085e+09
Bermuda	Final consumption expenditure	2.77381e+09	2.9611e+09	3.29274e+09	3.49311e+09	4.34413e+09	4662964776	4.82276e+09	3.72499e+09	3.78853e+09	3.57357e+09	3.50921e+09	3.41369e+09	3.2281e+09	3.10878e+09
Bhutan	Final consumption expenditure	3.83016e+08	4.08514e+08	4.39965e+08	4.82663e+08	5.01241e+08	5.10152e+08	5.38005e+08	6.09457e+08	6.21848e+08	7.45755e+08	8.15853e+08	8.36507e+08	8.62432e+08	9.11527e+08
Bolivia	Final consumption expenditure	6.97332e+09	7.07647e+09	7.23452e+09	7.38734e+09	7.60472e+09	7.85817e+09	8.16949e+09	8.50566e+09	8.95381e+09	9.28446e+09	9.64242e+09	1.01671e+10	1.06401e+10	1.13154e+10
Bosnia and Herzegovina	Final consumption expenditure	1.03632e+10	1.09475e+10	1.13456e+10	1.16476e+10	1.19353e+10	1.30328e+10	1.35634e+10	1.46555e+10	1.54107e+10	1.48668e+10	1.49354e+10	1.49092e+10	1.4849e+10	1.53406e+10
Botswana	Final consumption expenditure	5.09679e+09	4.92657e+09	5.17524e+09	5.24197e+09	5.48446e+09	5.7112e+09	6.27275e+09	6.9934e+09	7.95689e+09	8.34361e+09	8.95798e+09	9.59932e+09	9.73388e+09	1.05676e+10
Brazil	Final consumption expenditure	6.32324e+11	6.39991e+11	6.57104e+11	6.55338e+11	6.80858e+11	7.07275e+11	7.39104e+11	7.82212e+11	8.21498e+11	8.55178e+11	9.08709e+11	9.41021e+11	9.71577e+11	9.95002e+11
British Virgin Islands	Final consumption expenditure	4.23129e+08	4.31837e+08	4.08771e+08	3.50268e+08	3.5802e+08	4.03e+08	4.0345e+08	4.01395e+08	3.95062e+08	4.06221e+08	4.08413e+08	3.98317e+08	3.77279e+08	3.73628e+08
Brunei Darussalam	Final consumption expenditure	3.21065e+09	3.42878e+09	3.40488e+09	3.62056e+09	3.92622e+09	3.89547e+09	4.2009e+09	4.55841e+09	4.58069e+09	4.8153e+09	4.94219e+09	4.94158e+09	5.12387e+09	5.22535e+09
Bulgaria	Final consumption expenditure	1.93229e+10	2.05291e+10	2.11862e+10	2.26765e+10	2.43296e+10	2.54522e+10	2.7368e+10	2.986e+10	3.06684e+10	2.86334e+10	2.88742e+10	2.93909e+10	3.02529e+10	2.98575e+10
Burkina Faso	Final consumption expenditure	3.79478e+09	3.97878e+09	4.166e+09	4.45155e+09	4.68227e+09	5.02307e+09	5.27672e+09	5.42969e+09	5.81829e+09	5.92429e+09	6.11672e+09	6.38252e+09	7.08216e+09	7.43816e+09
Burundi	Final consumption expenditure	1.03339e+09	1.03199e+09	1.0881e+09	1.07868e+09	1.10378e+09	1.16681e+09	1.29709e+09	1.37011e+09	1.61219e+09	1.97105e+09	2.23325e+09	2.19111e+09	2.41573e+09	2.55441e+09
Cabo Verde	Final consumption expenditure	6.89532e+08	7.06098e+08	7.5771e+08	8.30726e+08	9.05005e+08	9.27662e+08	9.72525e+08	1.02401e+09	1.04548e+09	1.11176e+09	1.106e+09	1.13972e+09	1.14433e+09	9.75185e+08
Cambodia	Final consumption expenditure	3.79949e+09	3.89961e+09	4.23944e+09	4.56745e+09	5.07372e+09	5.66973e+09	6.03431e+09	6.45523e+09	7.24376e+09	7.33247e+09	7.99636e+09	8.81257e+09	9.22892e+09	9.5358e+09
Cameroon	Final consumption expenditure	1.11953e+10	1.16253e+10	1.21101e+10	1.27985e+10	1.32176e+10	1.35935e+10	1.40908e+10	1.48158e+10	1.53443e+10	1.58472e+10	1.66436e+10	1.75339e+10	1.84886e+10	1.95295e+10
Canada	Final consumption expenditure	7.34955e+11	7.55065e+11	7.80775e+11	8.04051e+11	8.26503e+11	8.52774e+11	8.86798e+11	9.22525e+11	9.5365e+11	9.6474e+11	9.96387e+11	1.01593e+12	1.03451e+12	1.05479e+12
Cayman Islands	Final consumption expenditure	2.11547e+09	2.12823e+09	2.16501e+09	2.20794e+09	2.22765e+09	2.37242e+09	2.48173e+09	2.56017e+09	2.55095e+09	2.36727e+09	2.30301e+09	2.32302e+09	2.35521e+09	2.38785e+09
Central African Republic	Final consumption expenditure	1.36728e+09	1.38159e+09	1.36389e+09	1.23484e+09	1.3348e+09	1.3668e+09	1.41907e+09	1.4816e+09	1.52054e+09	1.51803e+09	1.5403e+09	1.59609e+09	1.64831e+09	1.14142e+09
Chad	Final consumption expenditure	2.26713e+09	2.24685e+09	2.35493e+09	2.48283e+09	2.61593e+09	2.6954e+09	3.0471e+09	3.18845e+09	3.28269e+09	3.52631e+09	3.93042e+09	3.69016e+09	4.23917e+09	4.24504e+09
Chile	Final consumption expenditure	6.69664e+10	6.88905e+10	7.06019e+10	7.33648e+10	7.9242e+10	8.56013e+10	9.20624e+10	9.90096e+10	1.03357e+11	1.04152e+11	1.14325e+11	1.23269e+11	1.30187e+11	1.37182e+11
China	Final consumption expenditure	8.57388e+11	9.18668e+11	9.82266e+11	1.04451e+12	1.11984e+12	1.21252e+12	1.33218e+12	1.48031e+12	1.60859e+12	1.76012e+12	1.92193e+12	2.13121e+12	2.31439e+12	2.49711e+12
China: Hong Kong SAR	Final consumption expenditure	1.10402e+11	1.1271e+11	1.12165e+11	1.11068e+11	1.18025e+11	1.21149e+11	1.27641e+11	1.37728e+11	1.40358e+11	1.41003e+11	1.49118e+11	1.60505e+11	1.66995e+11	1.73826e+11
China: Macao SAR	Final consumption expenditure	3.81656e+09	3.86452e+09	4.07325e+09	4.24395e+09	4.55583e+09	4.86627e+09	5.15396e+09	5.72013e+09	5.98101e+09	6.28567e+09	6.70091e+09	7.34634e+09	7.9405e+09	8.4406e+09
Colombia	Final consumption expenditure	1.03827e+11	1.05566e+11	1.07156e+11	1.10082e+11	1.14855e+11	1.19764e+11	1.27269e+11	1.36204e+11	1.40904e+11	1.43142e+11	1.50469e+11	1.58735e+11	1.66142e+11	1.74171e+11
Comoros	Final consumption expenditure	3.56786e+08	3.66965e+08	3.77829e+08	3.8476e+08	4.02906e+08	4.34164e+08	4.51373e+08	4.58842e+08	4.84553e+08	5.06541e+08	5.16921e+08	5.35804e+08	5.57812e+08	5.80764e+08
Congo	Final consumption expenditure	1.61868e+09	1.83748e+09	2.02469e+09	2.07924e+09	2.19163e+09	2.27919e+09	2.39791e+09	2.53742e+09	2.70078e+09	2.82835e+09	2.9805e+09	3.2159e+09	3.56533e+09	3.7403e+09
Cook Islands	Final consumption expenditure	1.23524e+08	1.22202e+08	1.292e+08	1.36937e+08	1.44268e+08	1.3757e+08	1.47006e+08	1.36659e+08	1.48086e+08	1.13114e+08	1.16188e+08	1.24924e+08	1.22874e+08	1.29271e+08
Costa Rica	Final consumption expenditure	1.41092e+10	1.43185e+10	1.47442e+10	1.5154e+10	1.55881e+10	1.61971e+10	1.70732e+10	1.82543e+10	1.89019e+10	1.93286e+10	2.0201e+10	2.1031e+10	2.18561e+10	2.25464e+10
Côte d'Ivoire	Final consumption expenditure	1.2661e+10	1.42975e+10	1.37632e+10	1.41116e+10	1.37035e+10	1.39944e+10	1.38822e+10	1.45053e+10	1.48776e+10	1.47119e+10	1.50643e+10	1.40633e+10	1.76643e+10	1.80455e+10
Croatia	Final consumption expenditure	2.90711e+10	2.96422e+10	3.18742e+10	3.2986e+10	3.42389e+10	3.55146e+10	3.68369e+10	3.91676e+10	3.94914e+10	3.74583e+10	3.68911e+10	3.6953e+10	3.60198e+10	3.57506e+10
Cuba	Final consumption expenditure	3.0276e+10	3.13831e+10	3.22416e+10	3.43479e+10	3.56209e+10	36908500000	4.24401e+10	4.43108e+10	4.41818e+10	4.47052e+10	4.73321e+10	4.75814e+10	4.92052e+10	5.0777e+10
Curaçao	Final consumption expenditure	1.71443e+09	1.5818e+09	1.66718e+09	1.71427e+09	1.81544e+09	1.89879e+09	2.01778e+09	2.21323e+09	2.36539e+09	2.35816e+09	2.57482e+09	2.54877e+09	2.63599e+09	2.69615e+09
Cyprus	Final consumption expenditure	1.1782e+10	1.21839e+10	1.25397e+10	1.31944e+10	1.40022e+10	1.4459e+10	1.52263e+10	1.65506e+10	1.77879e+10	1.70909e+10	1.72102e+10	1.74848e+10	1.72866e+10	1.62856e+10
Czech Republic	Final consumption expenditure	7.88463e+10	8.11947e+10	8.48834e+10	8.92552e+10	9.0916e+10	9.31228e+10	9.56778e+10	9.85663e+10	1.00916e+11	1.01328e+11	1.02164e+11	1.01448e+11	9.98782e+10	1.00815e+11
Czechoslovakia (Former)	Final consumption expenditure
D.P.R. of Korea	Final consumption expenditure	1.2178e+10	1.27168e+10	1.2715e+10	1.29608e+10	1.31633e+10	1.36992e+10	1.3609e+10	1.34011e+10	1.38311e+10	1.37114e+10	1.36378e+10	1.37505e+10	1.39307e+10	1.40357e+10
D.R. of the Congo	Final consumption expenditure	9.00829e+09	8.72532e+09	8.08195e+09	9.81309e+09	1.0479e+10	1.13239e+10	1.15423e+10	1.23933e+10	1.26809e+10	1.27031e+10	1.52641e+10	1.56457e+10	1.61681e+10	1.77916e+10
Denmark	Final consumption expenditure	1.73481e+11	1.7489e+11	1.77841e+11	1.79527e+11	1.85901e+11	1.91176e+11	1.96541e+11	1.9963e+11	2.02436e+11	1.99965e+11	2.01864e+11	2.01089e+11	2.01389e+11	2.01604e+11
Djibouti	Final consumption expenditure	7.37085e+08	7.11592e+08	6.9491e+08	6.785e+08	7.13429e+08	7.31439e+08	7.9398e+08	8.5935e+08	9.81834e+08	8.72443e+08	1.00084e+09	1.10101e+09	1.17318e+09	1.26469e+09
Dominica	Final consumption expenditure	3.25335e+08	3.28555e+08	3.42554e+08	3.35215e+08	3.27518e+08	3.49778e+08	3.6412e+08	4.14065e+08	4.72397e+08	4.4642e+08	4.20124e+08	4.12236e+08	3.86848e+08	4.45996e+08
Dominican Republic	Final consumption expenditure	2.40429e+10	2.48833e+10	2.62906e+10	2.49921e+10	2.57626e+10	2.97416e+10	3.33009e+10	3.62798e+10	3.91163e+10	4.10329e+10	4.41386e+10	4.58047e+10	4.66963e+10	4.70191e+10
Ecuador	Final consumption expenditure	2.57303e+10	2.71867e+10	2.89131e+10	2.97017e+10	3.15284e+10	32884600000	3.42896e+10	3.58134e+10	3.80399e+10	3.83839e+10	4.11321e+10	4.34793e+10	4.52661e+10	4.7074e+10
Egypt	Final consumption expenditure	6.74705e+10	7.02479e+10	7.21788e+10	7.38848e+10	7.58994e+10	7.93341e+10	8.40521e+10	8.90705e+10	9.37458e+10	9.90595e+10	1.03179e+11	1.08627e+11	1.14654e+11	1.17921e+11
El Salvador	Final consumption expenditure	1.51979e+10	1.56904e+10	1.59235e+10	1.62205e+10	1.66676e+10	17510775261	1.83433e+10	1.94217e+10	1.97466e+10	1.79343e+10	1.83352e+10	1.87931e+10	1.92715e+10	1.94259e+10
Equatorial Guinea	Final consumption expenditure	3.14069e+08	3.62115e+08	5.78598e+08	5.76142e+08	6.63355e+08	7.73112e+08	7.57217e+08	8.06192e+08	8.86558e+08	9.22355e+08	9.39404e+08	1.11477e+09	1.2626e+09	1.33455e+09
Eritrea	Final consumption expenditure	1.25223e+09	1.24652e+09	1.34554e+09	1.47492e+09	1.52458e+09	1.41076e+09	1.23764e+09	1.17354e+09	1.06483e+09	1.13879e+09	1.16836e+09	9.91036e+08	9.0851e+08	9.60889e+08
Estonia	Final consumption expenditure	7.15787e+09	7.55138e+09	8.12636e+09	8.75295e+09	9.32042e+09	1.00333e+10	1.11232e+10	1.20583e+10	1.17318e+10	1.02938e+10	1.01645e+10	1.03915e+10	1.08722e+10	1.12569e+10
Ethiopia	Final consumption expenditure	7.76953e+09	8.20206e+09	8.32772e+09	8.24191e+09	8.72645e+09	1.10098e+10	1.25162e+10	1.39827e+10	1.55859e+10	1.75671e+10	2.00201e+10	2.07469e+10	2.20074e+10	2.34525e+10
Ethiopia (Former)	Final consumption expenditure
Fiji	Final consumption expenditure	2.26773e+09	2.37822e+09	2.36234e+09	2.45667e+09	2.79581e+09	2.69373e+09	2.99555e+09	2.95989e+09	3.04918e+09	2.73726e+09	2.6868e+09	2.53858e+09	2.72884e+09	2.82091e+09
Finland	Final consumption expenditure	1.26535e+11	1.29921e+11	1.33263e+11	1.37685e+11	1.41747e+11	1.45769e+11	1.50409e+11	1.54695e+11	1.57737e+11	1.55398e+11	1.58686e+11	1.61924e+11	1.62357e+11	1.62239e+11
France	Final consumption expenditure	1.55849e+12	1.59134e+12	1.62314e+12	1.64962e+12	1.68354e+12	1.71968e+12	1.75331e+12	1.79355e+12	1.80514e+12	1.82054e+12	1.85097e+12	1.86281e+12	1.86722e+12	1.881e+12
French Polynesia	Final consumption expenditure	4.14449e+09	4.51586e+09	4.97776e+09	5.28252e+09	4.98793e+09	5.30927e+09	5.38254e+09	5.61987e+09	5.66216e+09	5.68915e+09	5.63999e+09	5.69392e+09	5.71692e+09	5.68924e+09
Gabon	Final consumption expenditure	3.6344e+09	3.72891e+09	3.81822e+09	3.84138e+09	3.90606e+09	4.07755e+09	4.38824e+09	4.58452e+09	4.75805e+09	4.62763e+09	4.89437e+09	5.2384e+09	5.74389e+09	6.12036e+09
Gambia	Final consumption expenditure	4.38808e+08	4.15515e+08	4.32066e+08	4.23993e+08	5.54546e+08	6.20165e+08	6.44745e+08	6.43805e+08	6.74026e+08	6.79996e+08	7.59889e+08	6.63865e+08	7.27108e+08	7.69761e+08
Georgia	Final consumption expenditure	4.45855e+09	4.20412e+09	4.35899e+09	4.53534e+09	5.10519e+09	5.40315e+09	6.59659e+09	7.29277e+09	8.28014e+09	8.2254e+09	7.9049e+09	8.14409e+09	8.42475e+09	8.48895e+09
Germany	Final consumption expenditure	2.13288e+12	2.162e+12	2.15513e+12	2.15955e+12	2.16824e+12	2.17704e+12	2.20765e+12	2.2143e+12	2.24123e+12	2.25841e+12	2.27598e+12	2.31855e+12	2.33734e+12	2.35601e+12
Ghana	Final consumption expenditure	1.32027e+10	1.24647e+10	1.38455e+10	1.45733e+10	1.58405e+10	1.67857e+10	1.68793e+10	1.75176e+10	1.94595e+10	1.95763e+10	2.1574e+10	2.55281e+10	2.76787e+10	2.5471e+10
Greece	Final consumption expenditure	1.75193e+11	1.8258e+11	1.90248e+11	1.98435e+11	2.06946e+11	2.16356e+11	2.23957e+11	2.32748e+11	2.36888e+11	2.35886e+11	2.20566e+11	1.99237e+11	1.85013e+11	1.79298e+11
Greenland	Final consumption expenditure	1.50682e+09	1.44491e+09	1.54525e+09	1.64001e+09	1.68804e+09	1.73539e+09	1.77141e+09	1.85162e+09	1.86596e+09	1.89681e+09	1.89681e+09	1.90983e+09	1.90755e+09	1.94057e+09
Grenada	Final consumption expenditure	4.25579e+08	4.67311e+08	5.12272e+08	5.43839e+08	5.22515e+08	6.20774e+08	6.59206e+08	6.6943e+08	7.04322e+08	6.58662e+08	6.85965e+08	7.05539e+08	7.14621e+08	7.09055e+08
Guatemala	Final consumption expenditure	2.21263e+10	2.29999e+10	2.36888e+10	2.44732e+10	2.51613e+10	2.61781e+10	2.7429e+10	2.89817e+10	3.04268e+10	3.07711e+10	3.19792e+10	3.31699e+10	3.43122e+10	3.56696e+10
Guinea	Final consumption expenditure	2.1682e+09	2.1998e+09	2.27823e+09	2.15989e+09	2.2259e+09	2.19988e+09	2.27034e+09	2.30817e+09	2.41957e+09	2.31606e+09	2.40874e+09	2.76331e+09	2.95144e+09	3.11585e+09
Guinea-Bissau	Final consumption expenditure	5.39004e+08	5.77773e+08	5.70858e+08	5.42169e+08	6.01716e+08	6.02029e+08	6.44477e+08	6.56087e+08	7.01508e+08	7.04235e+08	7.4347e+08	7.5823e+08	7.4616e+08	7.62003e+08
Guyana	Final consumption expenditure	1.00717e+09	1.08275e+09	1.02505e+09	1.01809e+09	1.11145e+09	1.42384e+09	1.33309e+09	1.53239e+09	1.64222e+09	1.53584e+09	1.66786e+09	1.8219e+09	1.86077e+09	2.05323e+09
Haiti	Final consumption expenditure	4.49665e+09	4.42507e+09	4.37031e+09	4.40504e+09	4.26699e+09	4.49132e+09	4.54565e+09	4.72013e+09	4.72822e+09	4.81067e+09	5.47237e+09	5.31984e+09	5.04416e+09	5.18306e+09
Honduras	Final consumption expenditure	6.94973e+09	7.2858e+09	7.55765e+09	7.90375e+09	8.30215e+09	8.86489e+09	9.56452e+09	1.02471e+10	1.05768e+10	1.07072e+10	1.10087e+10	1.13187e+10	1.16277e+10	1.20107e+10
Hungary	Final consumption expenditure	6.83735e+10	7.12464e+10	7.64269e+10	8.20212e+10	8.36501e+10	8.60582e+10	8.73064e+10	8.62862e+10	8.63187e+10	8.251e+10	8.07751e+10	8.12482e+10	7.98386e+10	8.05768e+10
Iceland	Final consumption expenditure	1.14437e+10	1.13321e+10	1.14585e+10	1.20571e+10	1.27647e+10	1.38568e+10	1.42645e+10	1.51621e+10	1.46172e+10	1.35367e+10	1.33854e+10	1.36266e+10	1.37602e+10	1.38694e+10
India	Final consumption expenditure	4.47244e+11	4.71039e+11	4.82028e+11	5.07951e+11	5.32934e+11	5.79211e+11	6.24049e+11	6.82654e+11	7.35138e+11	7.96813e+11	8.61606e+11	9.38742e+11	9.87422e+11	1.03371e+12
Indonesia	Final consumption expenditure	1.6659e+11	1.7306e+11	1.8127e+11	1.89518e+11	1.98723e+11	2.07175e+11	2.15273e+11	2.25762e+11	2.39181e+11	2.54022e+11	2.64542e+11	2.76485e+11	2.89654e+11	3.04809e+11
Iran (Islamic Republic of)	Final consumption expenditure	8.01649e+10	8.3627e+10	9.18726e+10	9.64783e+10	1.07038e+11	1.17125e+11	1.24242e+11	1.29422e+11	1.25335e+11	1.24592e+11	1.26228e+11	1.34439e+11	1.30989e+11	1.30178e+11
Iraq	Final consumption expenditure	1.11364e+10	1.55007e+10	1.76467e+10	1.89026e+10	3.02567e+10	2.87205e+10	2.50811e+10	2.75102e+10	2.50161e+10	3.9535e+10	3.61278e+10	3.29842e+10	3.63957e+10	4.09054e+10
Ireland	Final consumption expenditure	1.00957e+11	1.07203e+11	1.11909e+11	1.15076e+11	1.18638e+11	1.26129e+11	1.34064e+11	1.43036e+11	1.43306e+11	1.36304e+11	1.34726e+11	1.32839e+11	1.30989e+11	1.30603e+11
Israel	Final consumption expenditure	1.00564e+11	1.04127e+11	1.06963e+11	1.05864e+11	1.09199e+11	1.12259e+11	1.17267e+11	1.25116e+11	1.2756e+11	1.30674e+11	1.36539e+11	1.41205e+11	1.4576e+11	1.50928e+11
Italy	Final consumption expenditure	1.39536e+12	1.41605e+12	1.42054e+12	1.43412e+12	1.44819e+12	1.46455e+12	1.47916e+12	1.49342e+12	1.4847e+12	1.46863e+12	1.48437e+12	1.47771e+12	1.42763e+12	1.39525e+12
Jamaica	Final consumption expenditure	9.20173e+09	9.25108e+09	9.43717e+09	9.7492e+09	9.77722e+09	1.04567e+10	1.06439e+10	1.11703e+10	1.14838e+10	1.0294e+10	1.01868e+10	1.04795e+10	1.04249e+10	1.04464e+10
Japan	Final consumption expenditure	3.24222e+12	3.31341e+12	3.364e+12	3.39183e+12	3.43397e+12	3.48037e+12	3.50974e+12	3.54376e+12	3.51775e+12	3.51909e+12	3.60895e+12	3.62695e+12	3.69761e+12	3.7718e+12
Jordan	Final consumption expenditure	1.07538e+10	1.12101e+10	1.12192e+10	1.13615e+10	1.21746e+10	1.35141e+10	1.44972e+10	1.58354e+10	1.76218e+10	1.83938e+10	1.75103e+10	1.79237e+10	1.89051e+10	1.91067e+10
Kazakhstan	Final consumption expenditure	5.08031e+10	5.6114e+10	5.63428e+10	6.26085e+10	7.08e+10	3.49057e+10	8.44985e+10	9.47366e+10	9.8722e+10	9.85677e+10	1.08388e+11	1.19758e+11	1.32212e+11	1.41904e+11
Kenya	Final consumption expenditure	1.66658e+10	1.74293e+10	1.76059e+10	1.80921e+10	1.84749e+10	1.94546e+10	2.08234e+10	2.20123e+10	2.20068e+10	2.31612e+10	2.47478e+10	2.62152e+10	2.77768e+10	2.97385e+10
Kiribati	Final consumption expenditure	1.49364e+08	1.44383e+08	1.54779e+08	1.49473e+08	1.4973e+08	1.78254e+08	1.55499e+08	1.56154e+08	1.58181e+08	1.58723e+08	1.49884e+08	1.55658e+08	1.75885e+08	1.68758e+08
Kosovo	Final consumption expenditure	3.97429e+09	4.12411e+09	3.98509e+09	3.99339e+09	3.96715e+09	4.18793e+09	4.26504e+09	4.57668e+09	4.90714e+09	4.94639e+09	5.04052e+09	5.15278e+09	5.25624e+09	5.49807e+09
Kuwait	Final consumption expenditure	2.78691e+10	2.81181e+10	3.1933e+10	3.34403e+10	3.53324e+10	3.86747e+10	4.23674e+10	4.6719e+10	4.85282e+10	4.55603e+10	4.16128e+10	4.38322e+10	4.81229e+10	4.74234e+10
Kyrgyzstan	Final consumption expenditure	1.81657e+09	1.83826e+09	1.8982e+09	2.22548e+09	2.376e+09	2.5108e+09	2.89496e+09	2.96746e+09	3.28424e+09	2.90377e+09	2.96047e+09	3.19596e+09	3.49898e+09	3.646e+09
Lao People's DR	Final consumption expenditure	1.88209e+09	1.89606e+09	1.89666e+09	1.95299e+09	1.98415e+09	2.12332e+09	2.02393e+09	2.20281e+09	2.39538e+09	2.53737e+09	2.72385e+09	2.99652e+09	3.27623e+09	3.48547e+09
Latvia	Final consumption expenditure	9.71399e+09	1.02159e+10	1.07959e+10	1.15191e+10	1.2531e+10	1.36201e+10	1.59153e+10	1.73701e+10	1.63695e+10	1.3927e+10	1.39811e+10	1.43979e+10	1.47459e+10	1.55504e+10
Lebanon	Final consumption expenditure	1.82069e+10	1.91538e+10	1.97029e+10	2.03357e+10	2.11216e+10	2.05937e+10	2.1268e+10	2.27827e+10	2.47784e+10	2.80228e+10	3.00414e+10	2.97451e+10	3.16926e+10	3.22749e+10
Lesotho	Final consumption expenditure	1.85292e+09	1.82681e+09	1.87429e+09	1.90744e+09	1.92444e+09	2.00281e+09	2.06098e+09	2.15902e+09	2.27957e+09	2.33465e+09	2.49255e+09	2.62406e+09	2.72128e+09	3.00415e+09
Liberia	Final consumption expenditure	504437600	643235470	742197156	245610287	747716699	845943380	1294127340	1234459098	1555606351	1412618419	1500998508	1628653749	1656264530	1850239038
Libya	Final consumption expenditure	1.09101e+10	1.23066e+10	1.25024e+10	1.30163e+10	1.29057e+10	1.4748e+10	1.5647e+10	1.63127e+10	1.68758e+10	1.67112e+10	1.73874e+10	6.75165e+09	1.37948e+10	1.15545e+10
Liechtenstein	Final consumption expenditure	2.40512e+09	2.40408e+09	2.38993e+09	2.36025e+09	2.40347e+09	2.47155e+09	2.63002e+09	2.81468e+09	2.7027e+09	2.51151e+09	2.65661e+09	2.52911e+09	2.6137e+09	2.66769e+09
Lithuania	Final consumption expenditure	1.51677e+10	1.56947e+10	1.65194e+10	1.80385e+10	1.9825e+10	2.16869e+10	2.33168e+10	2.56642e+10	2.64477e+10	2.27926e+10	2.20188e+10	2.2808e+10	2.35008e+10	2.43702e+10
Luxembourg	Final consumption expenditure	1.68659e+10	1.75364e+10	1.83187e+10	1.8663e+10	1.88962e+10	1.95567e+10	2.01071e+10	2.05523e+10	2.0709e+10	2.10845e+10	2.15903e+10	2.18592e+10	2.24071e+10	2.29986e+10
Madagascar	Final consumption expenditure	4.16127e+09	4.32884e+09	4.1556e+09	4.59916e+09	4.68831e+09	4.79394e+09	4.81766e+09	4.98766e+09	5.22486e+09	5.232e+09	5.31243e+09	5.35223e+09	5.47815e+09	4.99531e+09
Malawi	Final consumption expenditure	2.78581e+09	2.52665e+09	3.25482e+09	3.34789e+09	3.53983e+09	3.7396e+09	3.83118e+09	4.22441e+09	4.42138e+09	4.34477e+09	4.31886e+09	4.62813e+09	4.62857e+09	4.5371e+09
Malaysia	Final consumption expenditure	5.59534e+10	5.89427e+10	6.21725e+10	6.72824e+10	7.35917e+10	7.98914e+10	8.49876e+10	9.31998e+10	1.00984e+11	1.02412e+11	1.08729e+11	1.18061e+11	1.26496e+11	1.35731e+11
Maldives	Final consumption expenditure	5.18684e+08	5.27113e+08	5.67376e+08	5.83946e+08	6.9082e+08	7.36558e+08	8.16738e+08	9.39865e+08	1.05105e+09	9.93639e+08	9.95761e+08	1.01905e+09	9.9747e+08	1.26443e+09
Mali	Final consumption expenditure	3.98711e+09	4.25778e+09	4.24757e+09	4.26983e+09	4.86369e+09	4.71111e+09	4.92601e+09	5.14366e+09	5.31267e+09	5.47613e+09	5.72473e+09	5.95104e+09	5.99564e+09	6.38837e+09
Malta	Final consumption expenditure	4.73346e+09	4.8253e+09	4.82343e+09	5.0222e+09	5.09477e+09	5.18496e+09	5.35681e+09	5.39566e+09	5.54408e+09	5.56991e+09	5.58359e+09	5.72709e+09	5.83764e+09	5.9171e+09
Marshall Islands	Final consumption expenditure	1.66987e+08	1.73167e+08	1.80124e+08	1.85833e+08	1.98347e+08	2.02368e+08	2.04147e+08	2.06822e+08	2.09821e+08	2.06006e+08	2.18076e+08	2.19379e+08	2.26408e+08	2.28266e+08
Mauritania	Final consumption expenditure	1.56712e+09	1.57493e+09	1.74359e+09	1.90076e+09	1.9011e+09	1.97229e+09	2.09555e+09	2.25881e+09	2.32019e+09	2.33622e+09	2.55053e+09	2.72937e+09	2.92142e+09	3.09378e+09
Mauritius	Final consumption expenditure	4.17567e+09	4.30706e+09	4.47086e+09	4.66429e+09	5.01794e+09	5.35512e+09	5.65786e+09	5.87897e+09	6.18379e+09	6.34756e+09	6.5218e+09	6.6898e+09	6.874e+09	7.03227e+09
Mexico	Final consumption expenditure	5.77482e+11	5.87659e+11	5.95238e+11	6.1964e+11	6.51233e+11	6.78622e+11	7.14017e+11	7.35127e+11	7.50231e+11	7.10918e+11	7.46957e+11	7.78499e+11	8.13353e+11	8.32376e+11
Micronesia (FS of)	Final consumption expenditure	2.94743e+08	3.04897e+08	2.99381e+08	3.10506e+08	3.1118e+08	311717311	3.11432e+08	2.95049e+08	3.02769e+08	3.10668e+08	3.08493e+08	3.13488e+08	3.03972e+08	3.17806e+08
Monaco	Final consumption expenditure	2.96293e+09	3.02596e+09	3.07778e+09	3.13139e+09	3.20888e+09	3.27994e+09	3.45418e+09	3.92725e+09	3.97441e+09	3.61369e+09	3.68554e+09	3.90063e+09	3.93207e+09	4.30927e+09
Mongolia	Final consumption expenditure	1.409e+09	1.5128e+09	1.64866e+09	1.63219e+09	1.7401e+09	1.69865e+09	1.88972e+09	2.22035e+09	2.62671e+09	2.54879e+09	2.83885e+09	3.21897e+09	3.86329e+09	4.4937e+09
Montenegro	Final consumption expenditure	1.7807e+09	2.00114e+09	2.04007e+09	2.01155e+09	2.09029e+09	2.25261e+09	2.693e+09	3.30716e+09	3.63516e+09	3.26362e+09	3.31277e+09	3.34944e+09	3.28484e+09	3.32303e+09
Montserrat	Final consumption expenditure	5.47117e+07	5.50755e+07	4.99101e+07	5.23591e+07	6.12206e+07	6.90926e+07	6.3655e+07	6.47505e+07	7.59829e+07	6.39616e+07	6.5497e+07	6.32493e+07	6.73102e+07	6.68294e+07
Morocco	Final consumption expenditure	3.78641e+10	3.89497e+10	4.00765e+10	4.25536e+10	4.45726e+10	4.5717e+10	4.84616e+10	5.03381e+10	5.32333e+10	5.65122e+10	5.73701e+10	6.12542e+10	6.40606e+10	6.64431e+10
Mozambique	Final consumption expenditure	4.47377e+09	4.58744e+09	6.12961e+09	6.48761e+09	6.80419e+09	7.26403e+09	7.64437e+09	8.2168e+09	8.72276e+09	9.23249e+09	9.79285e+09	1.04063e+10	1.1137e+10	1.2038e+10
Myanmar	Final consumption expenditure	5.70997e+09	6.42675e+09	7.19934e+09	8.10248e+09	9.05096e+09	1.03728e+10	1.14405e+10	1.28591e+10	1.37586e+10	1.55072e+10	1.60183e+10	1.66398e+10	1.76611e+10	1.89675e+10
Namibia	Final consumption expenditure	4.91622e+09	5.26745e+09	5.17561e+09	5.52877e+09	5.68052e+09	5.60434e+09	6.11532e+09	6.59125e+09	7.24993e+09	8.11951e+09	7.93242e+09	8.3405e+09	8.77013e+09	9.37981e+09
Nauru	Final consumption expenditure	5.07762e+07	4.80517e+07	4.62396e+07	4.29726e+07	4.19076e+07	3.6126e+07	2.95655e+07	3.36561e+07	5.8346e+07	4.69072e+07	5.71429e+07	6.50163e+07	7.50388e+07	9.76229e+07
Nepal	Final consumption expenditure	5.82614e+09	6.37392e+09	6.62512e+09	6.88097e+09	7.00205e+09	7.30447e+09	7.66344e+09	7.93693e+09	8.05445e+09	8.54574e+09	9.03222e+09	9.20316e+09	9.7995e+09	1.00395e+10
Netherlands	Final consumption expenditure	4.46092e+11	4.57213e+11	4.67396e+11	4.71286e+11	4.72885e+11	4.7819e+11	4.91662e+11	5.04e+11	5.14364e+11	5.15489e+11	5.1714e+11	5.17205e+11	5.09481e+11	5.03897e+11
Netherlands Antilles (former)	Final consumption expenditure	2.36528e+09	2.23322e+09	2.34232e+09	2.37744e+09	2.50403e+09	2.52286e+09	2.54617e+09	2.84433e+09	2.94136e+09	2.84043e+09	2.88275e+09	2.88574e+09	2.8773e+09
New Caledonia	Final consumption expenditure	4.85743e+09	5.27722e+09	5.28066e+09	5.28568e+09	5.29658e+09	5.55823e+09	5.69259e+09	5.48535e+09	6.18649e+09	6.45314e+09	6.37343e+09	6.6771e+09	7.00354e+09	7.00972e+09
New Zealand	Final consumption expenditure	6.93818e+10	7.14355e+10	7.45316e+10	7.88799e+10	8.30526e+10	8.7562e+10	8.99221e+10	9.34625e+10	9.33104e+10	9.43227e+10	9.637e+10	9.89736e+10	1.00449e+11	1.03326e+11
Nicaragua	Final consumption expenditure	5.24664e+09	5.46394e+09	5.66606e+09	5.7879e+09	5.91406e+09	6.12829e+09	6.29402e+09	6.52282e+09	6.78252e+09	6.85265e+09	7.11971e+09	7.47694e+09	7.79718e+09	8.08142e+09
Niger	Final consumption expenditure	2.52087e+09	2.68421e+09	2.82356e+09	2.96779e+09	2.99853e+09	3.00834e+09	3.11914e+09	3.26462e+09	3.43289e+09	3.66047e+09	3.76613e+09	3.97116e+09	4.1609e+09	4.34959e+09
Nigeria	Final consumption expenditure	8.45143e+10	1.28329e+11	1.30956e+11	1.54113e+11	1.48398e+11	1.45113e+11	1.17011e+11	1.9571e+11	1.64831e+11	2.10881e+11	1.94528e+11	2.00035e+11	2.00171e+11	2.52055e+11
Norway	Final consumption expenditure	1.62264e+11	1.66763e+11	1.71829e+11	1.76152e+11	1.83136e+11	1.89577e+11	1.96978e+11	2.05217e+11	2.09165e+11	2.12079e+11	2.18901e+11	2.23026e+11	2.29342e+11	2.33811e+11
Oman	Final consumption expenditure	1.17588e+10	1.2438e+10	1.27679e+10	1.37913e+10	1.49917e+10	1.59625e+10	1.68179e+10	1.91256e+10	2.00264e+10	2.21589e+10	2.32035e+10	2.57882e+10	2.75755e+10	2.81221e+10
Pakistan	Final consumption expenditure	8.10487e+10	8.10476e+10	8.31059e+10	8.39793e+10	9.17667e+10	1.02635e+11	1.07751e+11	1.11646e+11	1.14982e+11	1.15839e+11	1.17529e+11	1.22128e+11	1.29453e+11	1.35465e+11
Palau	Final consumption expenditure	2.68945e+08	1.34569e+08	1.36522e+08	1.36477e+08	1.33703e+08	135505918	1.37398e+08	1.43448e+08	1.45396e+08	1.44674e+08	1.44269e+08	1.44358e+08	1.52638e+08	1.52926e+08
Panama	Final consumption expenditure	8.6524e+09	8.99242e+09	9.64843e+09	1.03547e+10	1.0763e+10	1.1631e+10	1.21164e+10	1.22806e+10	1.21133e+10	1.19044e+10	1.4926e+10	1.73977e+10	1.69901e+10	1.87663e+10
Papua New Guinea	Final consumption expenditure	2.73073e+09	2.53475e+09	2.91107e+09	2.61879e+09	2.92194e+09	3.11959e+09	3.36067e+09	3.69898e+09	3.87627e+09	4.80578e+09	5.97899e+09	7.75285e+09	1.0153e+10	8.6265e+09
Paraguay	Final consumption expenditure	5.55356e+09	5.59188e+09	5.36032e+09	5.71565e+09	6.0162e+09	6.18251e+09	6.40277e+09	6.74208e+09	7.28964e+09	7.189e+09	8.15053e+09	8.60143e+09	8.87347e+09	9.4783e+09
Peru	Final consumption expenditure	4.98832e+10	5.02482e+10	5.23321e+10	5.37511e+10	5.56316e+10	5.81072e+10	6.18387e+10	6.67752e+10	7.23549e+10	7.5457e+10	8.16622e+10	8.64072e+10	9.19414e+10	9.70355e+10
Philippines	Final consumption expenditure	7.00302e+10	7.23331e+10	7.51519e+10	7.91059e+10	8.34483e+10	8.69086e+10	9.1186e+10	9.5643e+10	9.87618e+10	1.02083e+11	1.05588e+11	1.11069e+11	1.19145e+11	1.26219e+11
Poland	Final consumption expenditure	2.15346e+11	2.20402e+11	2.26965e+11	2.31514e+11	2.41121e+11	2.47524e+11	2.59498e+11	2.74184e+11	2.90279e+11	3.00335e+11	3.08779e+11	3.14149e+11	3.16463e+11	3.204e+11
Portugal	Final consumption expenditure	1.56048e+11	1.58455e+11	1.61012e+11	1.61264e+11	1.65529e+11	1.68585e+11	1.70428e+11	1.73973e+11	1.75982e+11	1.73876e+11	1.76505e+11	1.70055e+11	1.61596e+11	1.59127e+11
Puerto Rico	Final consumption expenditure	5.2727e+10	5.43461e+10	5.62392e+10	5.82927e+10	6.00131e+10	60478400000	6.10728e+10	6.00052e+10	5.88001e+10	5.91785e+10	5.97286e+10	6.09932e+10	6.21567e+10	6.01388e+10
Qatar	Final consumption expenditure	8.58745e+09	8.36781e+09	8.85915e+09	9.07901e+09	1.04051e+10	1.34785e+10	1.72952e+10	1.92951e+10	2.12074e+10	2.58441e+10	2.89709e+10	3.1495e+10	3.36046e+10	3.613e+10
Republic of Korea	Final consumption expenditure	4.85034e+11	5.13098e+11	5.5541e+11	5.57049e+11	5.63145e+11	5.88161e+11	6.18464e+11	6.51217e+11	6.65173e+11	6.73458e+11	7.02152e+11	7.21401e+11	7.37421e+11	7.53355e+11
Republic of Moldova	Final consumption expenditure	2.17699e+09	2.24416e+09	2.5055e+09	2.86418e+09	2.88484e+09	3.28331e+09	3.54858e+09	3.68761e+09	3.89703e+09	3.6303e+09	3.89829e+09	4.18503e+09	4.2233e+09	4.44474e+09
Romania	Final consumption expenditure	6.2379e+10	6.52092e+10	6.709e+10	7.29372e+10	7.92356e+10	8.59811e+10	9.33482e+10	1.03839e+11	1.11158e+11	1.02778e+11	1.02464e+11	1.03241e+11	1.04299e+11	1.04705e+11
Russian Federation	Final consumption expenditure	3.70383e+11	3.8939e+11	4.13014e+11	4.35867e+11	4.72103e+11	5.10463e+11	5.55624e+11	6.15089e+11	6.66961e+11	6.40736e+11	6.63437e+11	6.98638e+11	7.47753e+11	7.74982e+11
Rwanda	Final consumption expenditure	1.82352e+09	1.94385e+09	2.20333e+09	2.10431e+09	2.24623e+09	2.44704e+09	2.77983e+09	2.97202e+09	3.11541e+09	3.53611e+09	3.83445e+09	4.03911e+09	4.36147e+09	4.48335e+09
Saint Kitts and Nevis	Final consumption expenditure	4.1622e+08	3.54837e+08	4.18949e+08	3.34086e+08	3.57287e+08	3.95201e+08	4.33699e+08	4.46285e+08	5.69297e+08	5.24455e+08	5.2259e+08	5.00837e+08	4.84405e+08	5.1152e+08
Saint Lucia	Final consumption expenditure	6.09241e+08	5.5823e+08	6.14071e+08	7.64903e+08	7.2844e+08	7.36667e+08	7.24343e+08	8.40679e+08	8.51991e+08	7.56752e+08	8.15938e+08	8.66784e+08	8.16584e+08	7.42228e+08
Samoa	Final consumption expenditure	3.67053e+08	4.14439e+08	4.29096e+08	4.51519e+08	4.7159e+08	4.94876e+08	4.97624e+08	5.29163e+08	5.10645e+08	5.00362e+08	5.09057e+08	5.15192e+08	5.21381e+08	5.25782e+08
San Marino	Final consumption expenditure	8.77798e+08	8.71453e+08	8.60877e+08	8.67222e+08	8.79914e+08	8.9895e+08	9.15872e+08	9.28563e+08	9.55302e+08	9.68252e+08	9.35397e+08	8.84557e+08	8.84197e+08	7.91195e+08
Sao Tome and Principe	Final consumption expenditure	1.34343e+08	1.22866e+08	1.24737e+08	1.32222e+08	1.42821e+08	1.33039e+08	1.74342e+08	1.7256e+08	1.88543e+08	1.95429e+08	2.17852e+08	2.25032e+08	2.27658e+08	2.42746e+08
Saudi Arabia	Final consumption expenditure	1.22251e+11	1.23e+11	1.23863e+11	1.28583e+11	1.41292e+11	1.56603e+11	1.74046e+11	1.8955e+11	2.0823e+11	2.17716e+11	2.25475e+11	2.414e+11	2.69261e+11	2.85079e+11
Senegal	Final consumption expenditure	6.30753e+09	6.58832e+09	6.86629e+09	7.20778e+09	7.53097e+09	7.91646e+09	8.29035e+09	8.72724e+09	9.15823e+09	9.48422e+09	9.69303e+09	9.8631e+09	1.0176e+10	1.08296e+10
Serbia	Final consumption expenditure	1.82647e+10	1.93099e+10	2.06674e+10	2.17019e+10	2.37671e+10	2.49991e+10	2.64037e+10	2.78534e+10	2.94289e+10	2.92845e+10	2.91589e+10	2.94321e+10	2.90669e+10	2.88741e+10
Seychelles	Final consumption expenditure	7.37272e+08	8.97052e+08	7.36685e+08	7.625e+08	7.5108e+08	7.95882e+08	8.97433e+08	9.07862e+08	1.01178e+09	9.24626e+08	1.01624e+09	1.1514e+09	1.15147e+09	1.05546e+09
Sierra Leone	Final consumption expenditure	9.89296e+08	1.21251e+09	1.50713e+09	1.59137e+09	1.63654e+09	1.65769e+09	1.68768e+09	1.82337e+09	1.97737e+09	2.13998e+09	1.91939e+09	2.34323e+09	2.52802e+09	2.67357e+09
Singapore	Final consumption expenditure	5.15499e+10	5.45199e+10	5.7273e+10	5.80509e+10	6.11136e+10	6.34961e+10	6.63808e+10	7.03694e+10	7.29287e+10	7.31438e+10	7.85348e+10	8.12588e+10	8.35004e+10	8.71974e+10
Sint Maarten (Dutch part)	Final consumption expenditure						6.18436e+08	5.92905e+08	6.41955e+08	7.09888e+08	6.76145e+08	6.39665e+08	6.0324e+08	5.61006e+08	6.13717e+08
Slovakia	Final consumption expenditure	2.93244e+10	3.08294e+10	3.24979e+10	3.36442e+10	3.46302e+10	3.66463e+10	3.9032e+10	4.1166e+10	4.35952e+10	4.41343e+10	4.43498e+10	4.39127e+10	4.353e+10	4.35257e+10
Slovenia	Final consumption expenditure	2.29539e+10	2.35284e+10	2.41569e+10	2.49439e+10	2.56682e+10	2.6262e+10	2.67111e+10	2.81165e+10	2.89611e+10	2.93289e+10	2.95482e+10	2.94195e+10	2.86542e+10	2.77431e+10
Solomon Islands	Final consumption expenditure	4.39543e+08	4.17723e+08	3.86986e+08	3.35019e+08	3.70815e+08	4.42119e+08	4.63894e+08	5.70292e+08	5.7653e+08	5.54698e+08	5.82167e+08	5.23438e+08	5.40477e+08	5.54468e+08
Somalia	Final consumption expenditure	1.54544e+09	1.57828e+09	1.66867e+09	1.74356e+09	1.8079e+09	1.87657e+09	1.90135e+09	1.95986e+09	2.01222e+09	2.06164e+09	2.11673e+09	2.17176e+09	2.22771e+09	2.28598e+09
South Africa	Final consumption expenditure	1.68832e+11	1.74577e+11	1.80708e+11	1.87074e+11	1.98279e+11	2.09955e+11	2.25656e+11	2.3762e+11	2.4262e+11	2.42173e+11	2.52196e+11	2.6247e+11	2.71372e+11	2.795e+11
South Sudan	Final consumption expenditure									5.20631e+09	5.20067e+09	6.04812e+09	5.57669e+09	5.66764e+09	5.99462e+09
Spain	Final consumption expenditure	7.21692e+11	7.48712e+11	7.72617e+11	7.95293e+11	8.31424e+11	8.67749e+11	9.03023e+11	9.38556e+11	9.46936e+11	9.30806e+11	9.36207e+11	9.21596e+11	8.92802e+11	8.70852e+11
Sri Lanka	Final consumption expenditure	1.59636e+10	1.61198e+10	1.7293e+10	1.8636e+10	1.94073e+10	2.00382e+10	2.14525e+10	2.2425e+10	2.41989e+10	2.50793e+10	2.69949e+10	3.04904e+10	3.21691e+10	3.322e+10
St. Vincent and the Grenadines	Final consumption expenditure	4.22022e+08	4.22824e+08	4.26026e+08	4.46918e+08	4.84798e+08	5.03285e+08	5.34626e+08	6.13413e+08	6.37058e+08	6.3953e+08	6.18355e+08	6.13356e+08	6.33582e+08	6.47331e+08
State of Palestine	Final consumption expenditure	5.20479e+09	5.01741e+09	4.49311e+09	5.0228e+09	5.77007e+09	6449600000	6.25591e+09	6.63271e+09	6.71673e+09	7.18131e+09	7.44682e+09	8.18463e+09	8.97443e+09	8.68227e+09
Sudan	Final consumption expenditure									2.76901e+10	3.18221e+10	3.23963e+10	3.25702e+10	3.17605e+10	3.25266e+10
Sudan (Former)	Final consumption expenditure	2.19108e+10	2.14133e+10	2.21315e+10	2.29289e+10	2.43667e+10	3.01647e+10	3.70621e+10	3.53617e+10	3.28964e+10	3.77792e+10	3.93507e+10
Suriname	Final consumption expenditure	1.23463e+09	1.34045e+09	1.33521e+09	1.629e+09	1.53643e+09	1.44788e+09	1.21761e+09	1.14439e+09	1.29587e+09	1.30527e+09	1.35439e+09	1.44943e+09	1.48332e+09	1.52433e+09
Swaziland	Final consumption expenditure	2.22513e+09	2.16146e+09	2.06184e+09	2.02143e+09	2.20091e+09	2.30203e+09	2.39127e+09	2.75413e+09	2.94251e+09	3.04335e+09	3.06231e+09	2.91325e+09	3.02651e+09	2.93694e+09
Sweden	Final consumption expenditure	2.54064e+11	2.55393e+11	2.61562e+11	2.66008e+11	2.70419e+11	2.75534e+11	2.81834e+11	2.89194e+11	2.90977e+11	2.93949e+11	3.02679e+11	3.07221e+11	3.09988e+11	3.15846e+11
Switzerland	Final consumption expenditure	2.58099e+11	2.63653e+11	2.65112e+11	2.67125e+11	2.71499e+11	2.75332e+11	2.78776e+11	2.84235e+11	2.86925e+11	2.91592e+11	2.95661e+11	2.98683e+11	3.06999e+11	3.13285e+11
Syrian Arab Republic	Final consumption expenditure	1.60439e+10	1.61657e+10	1.69666e+10	1.81889e+10	2.03231e+10	2.26158e+10	2.32384e+10	2.43161e+10	2.4737e+10	2.64627e+10	2.86543e+10	2.84106e+10	2.41508e+10	2.03184e+10
Tajikistan	Final consumption expenditure	1.25909e+09	1.3741e+09	1.51253e+09	1.70873e+09	1.89471e+09	2.21378e+09	2.44094e+09	2.8013e+09	3.02879e+09	3.26296e+09	3.56467e+09	4.3582e+09	4.95492e+09	5.14348e+09
TFYR of Macedonia	Final consumption expenditure	5.24965e+09	5.18896e+09	5.34581e+09	5.36522e+09	5.68469e+09	6.03207e+09	6.27168e+09	6.70758e+09	7.08822e+09	6.89634e+09	7.06609e+09	6.76474e+09	6.86055e+09	7.1181e+09
Thailand	Final consumption expenditure	9.9682e+10	1.04917e+11	1.09724e+11	1.17407e+11	1.25416e+11	1.31564e+11	1.35051e+11	1.38547e+11	1.42965e+11	1.43989e+11	1.52659e+11	1.55688e+11	1.65219e+11	1.6747e+11
Timor-Leste	Final consumption expenditure	9.95772e+08	1.23109e+09	1.18529e+09	9.4425e+08	7.90878e+08	670498580	7.4332e+08	9.34556e+08	1.00158e+09	1.16015e+09	1.20216e+09	1.20559e+09	1.30134e+09	1.24496e+09
Togo	Final consumption expenditure	1.9011e+09	1.95793e+09	2.03884e+09	2.10178e+09	2.1594e+09	2.36703e+09	2.55174e+09	2.64693e+09	2.32792e+09	2.48839e+09	2.60236e+09	2.63387e+09	2.69888e+09	3.15757e+09
Tonga	Final consumption expenditure	2.90454e+08	2.88763e+08	3.05184e+08	3.06023e+08	3.01151e+08	3.05604e+08	3.08597e+08	3.11226e+08	3.19001e+08	3.21994e+08	3.14547e+08	3.03852e+08	3.19621e+08	3.29806e+08
Trinidad and Tobago	Final consumption expenditure	7.61994e+09	6.78053e+09	7.70935e+09	7.73545e+09	9.49214e+09	6.87572e+09	6.8892e+09	1.04819e+10	1.19415e+10	1.24336e+10	1.01637e+10	1.09805e+10	1.11885e+10	1.03419e+10
Tunisia	Final consumption expenditure	2.01015e+10	2.11737e+10	2.20342e+10	2.31732e+10	2.4333e+10	2.54006e+10	2.6664e+10	2.81285e+10	2.94529e+10	3.06447e+10	3.19148e+10	3.3376e+10	3.48108e+10	3.64227e+10
Turkey	Final consumption expenditure	3.18835e+11	3.00236e+11	3.14947e+11	3.41113e+11	3.76327e+11	4.03325e+11	4.23905e+11	4.47765e+11	4.47511e+11	4.43067e+11	4.69729e+11	5.03927e+11	5.05913e+11	5.32571e+11
Turkmenistan	Final consumption expenditure	5.61022e+09	7.36216e+09	6.57497e+09	8.23492e+09	9.39246e+09	8.48969e+09	6.66495e+09	7.88756e+09	8.94427e+09	5.11417e+09	3.39895e+09	4.47959e+09	7.04727e+09	5.99958e+09
Turks and Caicos Islands	Final consumption expenditure	1.80211e+08	1.9011e+08	2.00137e+08	2.32992e+08	2.61015e+08	348065700	4.92142e+08	5.78833e+08	4.77264e+08	3.58677e+08	3.08595e+08	4.09042e+08	4.31691e+08	3.74748e+08
Tuvalu	Final consumption expenditure	3.41093e+07	2.52397e+07	2.73801e+07	2.78233e+07	2.28684e+07	2.25302e+07	2.16051e+07	2.16711e+07	2.40773e+07	2.42791e+07	2.57143e+07	2.6188e+07	2.53408e+07	2.62348e+07
U.R. of Tanzania: Mainland	Final consumption expenditure	9.63e+09	9.97917e+09	1.07484e+10	1.15397e+10	1.24576e+10	1.38746e+10	1.50003e+10	1.60171e+10	1.70008e+10	1.8192e+10	1.874e+10	2.01475e+10	2.11649e+10	2.33361e+10
Uganda	Final consumption expenditure	7.40726e+09	8.02986e+09	8.56777e+09	8.72509e+09	9.02866e+09	9.71578e+09	1.0806e+10	1.10612e+10	1.21081e+10	1.29687e+10	1.45388e+10	1.51211e+10	1.50274e+10	1.52655e+10
Ukraine	Final consumption expenditure	4.52995e+10	4.948e+10	5.06633e+10	5.52842e+10	5.99021e+10	6.84298e+10	7.644e+10	8.6545e+10	9.48905e+10	8.28569e+10	8.80727e+10	9.79499e+10	1.0512e+11	1.03007e+11
United Arab Emirates	Final consumption expenditure	9.04275e+10	9.72569e+10	1.03055e+11	1.05459e+11	1.15316e+11	1.17655e+11	1.32659e+11	1.47065e+11	1.62127e+11	1.27952e+11	1.39216e+11	1.41194e+11	1.44671e+11	1.60158e+11
United Kingdom	Final consumption expenditure	1.70254e+12	1.76772e+12	1.83943e+12	1.91441e+12	1.97964e+12	2.03519e+12	2.07802e+12	2.12552e+12	2.12782e+12	2.08388e+12	2.08968e+12	2.091e+12	2.12071e+12	2.15057e+12
United States	Final consumption expenditure	9.31151e+12	9.56872e+12	9.83738e+12	1.01179e+13	1.0461e+13	10774160000000	1.10606e+13	1.12907e+13	1.13112e+13	1.12452e+13	1.1421e+13	1.15692e+13	1.17271e+13	1.19281e+13
Uruguay	Final consumption expenditure	1.51828e+10	1.45923e+10	1.32955e+10	1.28803e+10	1.32598e+10	1.39547e+10	1.4772e+10	1.57725e+10	1.72112e+10	1.71064e+10	1.90731e+10	2.07951e+10	2.19208e+10	2.30546e+10
USSR (Former)	Final consumption expenditure
Uzbekistan	Final consumption expenditure	8.85603e+09	9.08944e+09	9.33757e+09	9.20177e+09	9.5583e+09	1.02077e+10	1.14224e+10	1.28478e+10	1.25416e+10	1.4358e+10	1.54097e+10	1.74791e+10	1.84544e+10	1.9806e+10
Vanuatu	Final consumption expenditure	2.95549e+08	2.9608e+08	3.01019e+08	3.06708e+08	3.11119e+08	3.17532e+08	3.26119e+08	3.36369e+08	3.45079e+08	3.62037e+08	3.72817e+08	3.81188e+08	3.89741e+08	3.99598e+08
Venezuela	Final consumption expenditure	6.54803e+10	6.95197e+10	6.51923e+10	6.37044e+10	7.33778e+10	8.41155e+10	9.61078e+10	1.11742e+11	1.18468e+11	1.16014e+11	1.14768e+11	1.19831e+11	1.28057e+11	1.33741e+11
Viet Nam	Final consumption expenditure	2.64188e+10	2.76451e+10	2.97031e+10	3.20632e+10	3.43552e+10	3.68747e+10	3.99567e+10	4.42115e+10	4.82783e+10	4.99568e+10	5.50465e+10	5.74393e+10	6.03543e+10	6.35893e+10
Yemen	Final consumption expenditure	9.31851e+09	1.01894e+10	1.08845e+10	1.16827e+10	1.24704e+10	1.31044e+10	1.53333e+10	1.6686e+10	1.7207e+10	1.77182e+10	1.81036e+10	1.483e+10	1.53215e+10	1.55027e+10
Yemen Arab Republic (Former)	Final consumption expenditure
Yemen Democratic (Former)	Final consumption expenditure
Yugoslavia (Former)	Final consumption expenditure
Zambia	Final consumption expenditure	5.07614e+09	5.4268e+09	5.52454e+09	5.34051e+09	5.47918e+09	5.62929e+09	6.09232e+09	8.50894e+09	8.84833e+09	8.7527e+09	9.94975e+09	1.05062e+10	1.11609e+10	1.20144e+10
Zanzibar	Final consumption expenditure	2.54635e+08	2.68775e+08	2.86194e+08	3.0366e+08	3.19215e+08	3.3489e+08	3.61866e+08	3.94059e+08	4.12673e+08	4.5863e+08	4.72895e+08	5.11194e+08	5.41361e+08	5.91459e+08
Zimbabwe	Final consumption expenditure	6.31816e+09	7.43083e+09	8.15359e+09	7.50182e+09	7.21755e+09	6684758976	6.51592e+09	7.39245e+09	6.84452e+09	1.51338e+10	1.2446e+10	1.55913e+10	1.80367e+10	1.91963e+10
Afghanistan	General government final consumption expenditure	3.14642e+08	3.09011e+08	4.38313e+08	5.65376e+08	6.55199e+08	6.64355e+08	8.76891e+08	1.06461e+09	1.07987e+09	1.2783e+09	1.22716e+09	1.40756e+09	1.62042e+09	1.76599e+09
Albania	General government final consumption expenditure	6.95743e+08	7.6663e+08	8.09345e+08	7.94173e+08	8.52957e+08	8.75336e+08	8.46545e+08	9.06103e+08	9.83099e+08	1.01985e+09	1.0603e+09	1.06721e+09	1.07283e+09	1.08716e+09
Algeria	General government final consumption expenditure	1.02384e+10	1.05455e+10	1.15684e+10	1.19618e+10	1.20455e+10	1.18166e+10	1.25493e+10	1.27626e+10	1.43069e+10	1.5523e+10	1.64233e+10	1.80328e+10	1.85377e+10	1.8686e+10
Andorra	General government final consumption expenditure	3.68718e+08	3.87322e+08	4.13594e+08	4.67208e+08	5.1685e+08	5.62284e+08	5.89545e+08	6.0093e+08	5.83311e+08	6.12242e+08	5.8029e+08	5.50268e+08	5.18869e+08	5.14661e+08
Angola	General government final consumption expenditure	9.23728e+09	7.74823e+09	8.99415e+09	8.93119e+09	8.94816e+09	9.14949e+09	8.95186e+09	1.19239e+10	1.59542e+10	1.76772e+10	1.82782e+10	1.89911e+10	1.99786e+10	2.05966e+10
Anguilla	General government final consumption expenditure	2.47299e+07	2.86143e+07	2.6978e+07	2.7933e+07	2.11848e+07	2.78037e+07	3.08643e+07	3.35533e+07	3.68835e+07	4.03183e+07	4.28078e+07	3.97161e+07	3.77031e+07	3.73802e+07
Antigua and Barbuda	General government final consumption expenditure	1.54307e+08	1.65034e+08	1.88243e+08	1.6865e+08	1.76364e+08	1.68415e+08	1.73195e+08	1.93065e+08	2.23814e+08	2.16726e+08	1.82784e+08	1.75586e+08	1.80132e+08	1.81748e+08
Argentina	General government final consumption expenditure	2.20038e+10	2.15485e+10	2.04542e+10	2.0753e+10	2.13171e+10	2.29996e+10	2.40411e+10	2.59364e+10	2.70788e+10	2.93789e+10	3.14955e+10	3.42586e+10	3.64923e+10	3.8345e+10
Armenia	General government final consumption expenditure	3.21878e+08	3.3562e+08	3.4296e+08	3.9136e+08	4.34329e+08	5.17048e+08	5.89567e+08	6.20334e+08	6.08796e+08	6.01343e+08	6.24764e+08	6.3679e+08	6.27582e+08	7.30165e+08
Aruba	General government final consumption expenditure	4.85491e+08	5.53945e+08	5.55607e+08	5.48384e+08	5.53319e+08	5.38933e+08	5.51328e+08	5.78159e+08	5.89411e+08	5.88545e+08	6.19704e+08	6.05855e+08	5.85949e+08	6.10349e+08
Australia	General government final consumption expenditure	1.11993e+11	1.15492e+11	1.18996e+11	1.24022e+11	1.28014e+11	1.32033e+11	1.36239e+11	1.40573e+11	1.46609e+11	1.49255e+11	1.5425e+11	1.60139e+11	1.6189e+11	1.64602e+11
Austria	General government final consumption expenditure	5.73577e+10	5.72203e+10	5.77192e+10	5.83136e+10	5.91415e+10	6.04738e+10	6.24141e+10	6.33158e+10	6.56463e+10	6.72638e+10	6.75695e+10	6.76251e+10	6.78797e+10	6.83358e+10
Azerbaijan	General government final consumption expenditure	8.68548e+08	9.14818e+08	1.04774e+09	1.27903e+09	1.33488e+09	1.38044e+09	1.44592e+09	1.50255e+09	1.57582e+09	1.64865e+09	1.70465e+09	1.76209e+09	1.81691e+09	1.88158e+09
Bahamas	General government final consumption expenditure	9.60972e+08	9.88004e+08	9.75127e+08	8.74562e+08	8.46673e+08	873200000	8.88466e+08	8.86999e+08	9.50868e+08	9.87826e+08	9.84935e+08	1.05626e+09	1.01525e+09	1.05237e+09
Bahrain	General government final consumption expenditure	1.54354e+09	1.61102e+09	1.74395e+09	1.96276e+09	2.03822e+09	2.19053e+09	2.27288e+09	2.47469e+09	2.69676e+09	3.06742e+09	3.17229e+09	3.7561e+09	4.38453e+09	4.64229e+09
Bangladesh	General government final consumption expenditure	2.06157e+09	2.15376e+09	2.56645e+09	2.90486e+09	3.21486e+09	3.46605e+09	3.67276e+09	3.90796e+09	4.04912e+09	4.28773e+09	4.66843e+09	5.05608e+09	5.2627e+09	5.46697e+09
Barbados	General government final consumption expenditure	6.48135e+08	7.79402e+08	4.96839e+08	6.67694e+08	6.45498e+08	6.3775e+08	5.70009e+08	6.79568e+08	6.99499e+08	7.15362e+08	6.30365e+08	6.08391e+08	4.5047e+08	5.90031e+08
Belarus	General government final consumption expenditure	6.02489e+09	6.22401e+09	6.24789e+09	6.26585e+09	6.24621e+09	6.27926e+09	6.26972e+09	6.23845e+09	6.25938e+09	6.25448e+09	6.45006e+09	6.22571e+09	6.16958e+09	6.01341e+09
Belgium	General government final consumption expenditure	7.9508e+10	8.06727e+10	8.27967e+10	8.40023e+10	8.53696e+10	8.59614e+10	8.69645e+10	8.85207e+10	9.11219e+10	9.24737e+10	9.35439e+10	9.42916e+10	9.56534e+10	9.6689e+10
Belize	General government final consumption expenditure	1.23667e+08	1.31213e+08	1.48444e+08	1.56302e+08	1.54884e+08	161001616	1.60602e+08	1.7668e+08	1.82854e+08	1.88446e+08	1.95689e+08	1.9289e+08	2.01152e+08	2.02576e+08
Benin	General government final consumption expenditure	4.52543e+08	4.67237e+08	4.87148e+08	5.2159e+08	5.05286e+08	5.2294e+08	5.4138e+08	5.63718e+08	5.91504e+08	6.18549e+08	6.36571e+08	6.53529e+08	6.81517e+08	7.10068e+08
Bermuda	General government final consumption expenditure	4.6491e+08	6.39217e+08	6.82744e+08	7.55822e+08	9.45724e+08	1002449820	9.998e+08	8.00667e+08	8.24611e+08	7.41218e+08	7.7109e+08	7.70633e+08	7.27815e+08	6.69743e+08
Bhutan	General government final consumption expenditure	1.2882e+08	1.39245e+08	1.513e+08	1.62749e+08	1.74573e+08	1.79399e+08	2.04386e+08	2.13738e+08	2.16461e+08	2.61596e+08	2.81345e+08	2.9142e+08	2.89219e+08	2.61488e+08
Bolivia	General government final consumption expenditure	1.29817e+09	1.33533e+09	1.3815e+09	1.43085e+09	1.4759e+09	1.52543e+09	1.57537e+09	1.63473e+09	1.69866e+09	1.76355e+09	1.81767e+09	1.94932e+09	2.04455e+09	2.2345e+09
Bosnia and Herzegovina	General government final consumption expenditure	2.22713e+09	2.1267e+09	2.11326e+09	2.16275e+09	2.30301e+09	2.42509e+09	2.49059e+09	2.79329e+09	2.88621e+09	2.90655e+09	2.95678e+09	2.93354e+09	2.95663e+09	3.06636e+09
Botswana	General government final consumption expenditure	1.82875e+09	1.80239e+09	1.89614e+09	1.91928e+09	2.05676e+09	1.92673e+09	1.85017e+09	1.91531e+09	2.01081e+09	2.07039e+09	2.14769e+09	2.25482e+09	2.3051e+09	2.82612e+09
Brazil	General government final consumption expenditure	1.51502e+11	1.55657e+11	1.63044e+11	1.64926e+11	1.71676e+11	1.7563e+11	1.80155e+11	1.89389e+11	1.95394e+11	2.01468e+11	2.09997e+11	2.14047e+11	2.2117e+11	2.25535e+11
British Virgin Islands	General government final consumption expenditure	8.72772e+07	8.78676e+07	8.32484e+07	7.00536e+07	7.14e+07	80000000	7.95668e+07	7.90494e+07	7.74107e+07	7.95691e+07	8.00199e+07	7.78665e+07	7.31983e+07	7.22768e+07
Brunei Darussalam	General government final consumption expenditure	1.63171e+09	1.78321e+09	1.74778e+09	1.70258e+09	1.77316e+09	1.75461e+09	1.97972e+09	2.29194e+09	2.27438e+09	2.39411e+09	2.47732e+09	2.38678e+09	2.43565e+09	2.46129e+09
Bulgaria	General government final consumption expenditure	4.3256e+09	4.45175e+09	4.52075e+09	4.93077e+09	5.14988e+09	5.21878e+09	5.41598e+09	5.48776e+09	5.43044e+09	5.01256e+09	5.11974e+09	5.20972e+09	5.15616e+09	5.30108e+09
Burkina Faso	General government final consumption expenditure	7.51823e+08	8.43118e+08	8.94663e+08	9.18186e+08	9.94763e+08	1.07995e+09	1.22243e+09	1.29808e+09	1.32431e+09	1.35808e+09	1.43906e+09	1.54488e+09	1.6796e+09	1.6257e+09
Burundi	General government final consumption expenditure	1.1414e+08	1.36454e+08	1.38924e+08	1.43258e+08	1.55922e+08	1.61801e+08	1.61932e+08	1.91482e+08	2.83027e+08	3.32176e+08	4.11983e+08	4.09799e+08	4.17995e+08	4.36805e+08
Cabo Verde	General government final consumption expenditure	1.42041e+08	1.37006e+08	1.50149e+08	1.75394e+08	1.93387e+08	2.06199e+08	2.00458e+08	2.23365e+08	2.31943e+08	2.48762e+08	2.53716e+08	2.69042e+08	2.59534e+08	2.58872e+08
Cambodia	General government final consumption expenditure	2.12879e+08	2.3172e+08	3.55864e+08	3.69563e+08	3.51251e+08	3.65053e+08	3.71293e+08	4.43732e+08	4.65921e+08	5.66985e+08	6.37856e+08	6.87476e+08	7.26978e+08	7.77977e+08
Cameroon	General government final consumption expenditure	1.3993e+09	1.47674e+09	1.52813e+09	1.58076e+09	1.64215e+09	1.6533e+09	1.70214e+09	1.85662e+09	1.97381e+09	2.06512e+09	2.23849e+09	2.36068e+09	2.48987e+09	2.65089e+09
Canada	General government final consumption expenditure	1.98264e+11	2.04764e+11	2.09273e+11	2.15289e+11	2.19642e+11	2.23077e+11	2.3001e+11	2.36378e+11	2.47257e+11	2.55433e+11	2.62446e+11	2.64584e+11	2.67884e+11	2.68983e+11
Cayman Islands	General government final consumption expenditure	3.97147e+08	3.99417e+08	4.05946e+08	4.14067e+08	4.17894e+08	4.45087e+08	4.65531e+08	4.80198e+08	4.785e+08	4.44066e+08	4.32008e+08	4.3575e+08	4.41786e+08	4.47914e+08
Central African Republic	General government final consumption expenditure	3.54916e+08	3.0724e+08	3.01441e+08	2.0991e+08	2.17228e+08	2.22091e+08	2.21084e+08	2.08052e+08	2.10681e+08	2.11018e+08	2.41362e+08	2.47252e+08	2.47474e+08	2.05472e+08
Chad	General government final consumption expenditure	9.2811e+08	9.55623e+08	1.05313e+09	1.1295e+09	1.20492e+09	1.23569e+09	1.41196e+09	1.4536e+09	1.49915e+09	1.68355e+09	1.76773e+09	1.53615e+09	1.96781e+09	2.05636e+09
Chile	General government final consumption expenditure	1.07078e+10	1.1022e+10	1.13612e+10	1.16379e+10	1.23423e+10	1.30723e+10	1.39031e+10	1.48794e+10	1.49267e+10	1.62976e+10	1.70427e+10	1.74626e+10	1.81019e+10	1.88538e+10
China	General government final consumption expenditure	2.18283e+11	2.4016e+11	2.56588e+11	2.69386e+11	2.85663e+11	3.2216e+11	3.59575e+11	4.01893e+11	4.37759e+11	4.75087e+11	5.28279e+11	5.79877e+11	6.30809e+11	6.83564e+11
China: Hong Kong SAR	General government final consumption expenditure	1.51762e+10	1.61372e+10	1.66003e+10	1.69949e+10	1.72306e+10	1.6788e+10	1.69378e+10	1.74732e+10	1.7827e+10	1.8241e+10	1.88525e+10	1.93153e+10	2.00074e+10	2.04723e+10
China: Macao SAR	General government final consumption expenditure	9.35989e+08	9.37e+08	9.82435e+08	1.04954e+09	1.09788e+09	1.19635e+09	1.2588e+09	1.44877e+09	1.49041e+09	1.68734e+09	1.76963e+09	1.87239e+09	1.98846e+09	2.11337e+09
Colombia	General government final consumption expenditure	1.98597e+10	2.02996e+10	2.01837e+10	2.05512e+10	2.18646e+10	2.29973e+10	2.4268e+10	2.57567e+10	2.65891e+10	2.81778e+10	2.97596e+10	3.08152e+10	3.2584e+10	3.51873e+10
Comoros	General government final consumption expenditure	3.96025e+07	5.64024e+07	6.31739e+07	5.45496e+07	5.31588e+07	5.21813e+07	5.54471e+07	5.61314e+07	7.01642e+07	8.05485e+07	8.96505e+07	9.14435e+07	9.34552e+07	9.55113e+07
Congo	General government final consumption expenditure	4.6258e+08	4.69328e+08	5.7204e+08	5.54047e+08	5.95281e+08	6.1672e+08	6.50011e+08	6.43514e+08	6.83999e+08	7.15737e+08	7.38845e+08	7.62488e+08	8.97613e+08	9.55682e+08
Cook Islands	General government final consumption expenditure	5.5158e+07	5.82635e+07	5.93372e+07	5.66877e+07	5.8397e+07	6.42802e+07	6.25219e+07	5.81287e+07	6.11533e+07	4.75477e+07	4.87569e+07	5.21227e+07	5.14857e+07	5.41128e+07
Costa Rica	General government final consumption expenditure	2.56916e+09	2.66177e+09	2.72193e+09	2.71428e+09	2.74946e+09	2.75512e+09	2.83503e+09	2.89945e+09	3.0261e+09	3.22929e+09	3.38012e+09	3.43342e+09	3.47288e+09	3.60661e+09
Côte d'Ivoire	General government final consumption expenditure	1.61156e+09	1.65184e+09	1.70465e+09	1.72086e+09	1.72946e+09	1.80555e+09	2.08722e+09	2.16863e+09	2.29874e+09	2.28725e+09	2.34214e+09	2.18521e+09	2.49333e+09	2.26644e+09
Croatia	General government final consumption expenditure	7.54222e+09	7.22811e+09	7.65791e+09	7.82017e+09	8.06829e+09	8.31514e+09	8.75039e+09	9.32342e+09	9.25815e+09	9.45533e+09	9.30328e+09	9.27597e+09	9.18049e+09	9.22904e+09
Cuba	General government final consumption expenditure	1.03766e+10	1.07167e+10	1.11593e+10	1.19723e+10	1.29974e+10	14349000000	1.54813e+10	1.71017e+10	1.75384e+10	1.78422e+10	1.82414e+10	1.80296e+10	1.90792e+10	1.95002e+10
Curaçao	General government final consumption expenditure	5.12716e+08	3.34793e+08	3.39761e+08	3.73411e+08	3.85107e+08	3.75224e+08	3.85593e+08	4.14923e+08	4.2812e+08	4.47577e+08	4.51168e+08	4.63524e+08	4.80142e+08	4.84488e+08
Cyprus	General government final consumption expenditure	2.48254e+09	2.52215e+09	2.61166e+09	2.95344e+09	2.98894e+09	3.0726e+09	3.28862e+09	3.3962e+09	3.58809e+09	3.81732e+09	3.76342e+09	3.78994e+09	3.68723e+09	3.50746e+09
Czech Republic	General government final consumption expenditure	2.363e+10	2.44204e+10	2.6416e+10	2.79975e+10	2.75676e+10	2.77375e+10	2.78439e+10	2.79512e+10	2.82659e+10	2.91254e+10	2.92394e+10	2.83822e+10	2.80982e+10	2.87381e+10
Czechoslovakia (Former)	General government final consumption expenditure
D.R. of the Congo	General government final consumption expenditure	4.65069e+08	3.047e+08	4.97565e+08	4.38904e+08	6.73126e+08	8.31174e+08	1.03797e+09	1.11857e+09	1.34203e+09	1.11076e+09	1.81702e+09	1.86534e+09	1.91345e+09	2.18545e+09
Denmark	General government final consumption expenditure	6.04418e+10	6.15924e+10	6.29047e+10	6.30573e+10	6.40188e+10	6.47909e+10	6.6436e+10	6.72334e+10	6.94183e+10	7.15332e+10	7.24488e+10	7.1303e+10	7.12921e+10	7.13318e+10
Djibouti	General government final consumption expenditure	1.68525e+08	1.55719e+08	1.68021e+08	1.80959e+08	1.87473e+08	1.78099e+08	2.17816e+08	2.03222e+08	2.16025e+08	1.94638e+08	2.03203e+08	2.10225e+08	2.17465e+08	2.27415e+08
Dominica	General government final consumption expenditure	5.9866e+07	5.94094e+07	5.93368e+07	5.25873e+07	5.52186e+07	5.62704e+07	5.52186e+07	6.08404e+07	5.83428e+07	6.82454e+07	6.87784e+07	7.06925e+07	7.39408e+07	7.57514e+07
Dominican Republic	General government final consumption expenditure	1.89876e+09	2.07346e+09	2.23872e+09	1.95755e+09	2.03157e+09	2.23981e+09	2.48719e+09	2.73702e+09	2.94683e+09	2.84756e+09	2.94019e+09	2.95074e+09	3.28983e+09	3.07386e+09
Ecuador	General government final consumption expenditure	4.10773e+09	3.97121e+09	4.06506e+09	4.1119e+09	4.2961e+09	4448700000	4.61749e+09	4.88014e+09	5.4204e+09	6.04988e+09	6.31533e+09	6.86459e+09	7.62732e+09	8.21671e+09
Egypt	General government final consumption expenditure	8.72789e+09	9.15494e+09	9.60868e+09	9.91404e+09	1.02194e+10	1.05055e+10	1.08326e+10	1.0853e+10	1.10834e+10	1.17006e+10	1.22278e+10	1.26906e+10	1.30892e+10	1.35426e+10
El Salvador	General government final consumption expenditure	1.52324e+09	1.59265e+09	1.5944e+09	1.5894e+09	1.60638e+09	1640155000	1.67599e+09	1.68353e+09	1.67754e+09	1.77566e+09	1.81585e+09	1.88526e+09	1.93195e+09	2.0483e+09
Equatorial Guinea	General government final consumption expenditure	1.04045e+08	1.27461e+08	2.26909e+08	1.75465e+08	1.59666e+08	2.24833e+08	2.32002e+08	2.37054e+08	3.27269e+08	3.53413e+08	4.08192e+08	4.20846e+08	4.33892e+08	4.94409e+08
Eritrea	General government final consumption expenditure	5.19934e+08	4.37763e+08	4.15408e+08	5.03777e+08	4.1251e+08	3.8702e+08	2.75171e+08	2.7347e+08	2.76486e+08	2.63136e+08	3.41991e+08	3.09574e+08	2.92269e+08	2.99114e+08
Estonia	General government final consumption expenditure	1.99688e+09	2.06007e+09	2.12492e+09	2.21101e+09	2.27765e+09	2.34613e+09	2.47332e+09	2.63621e+09	2.75535e+09	2.66611e+09	2.65554e+09	2.69977e+09	2.78813e+09	2.8673e+09
Ethiopia	General government final consumption expenditure	1.70542e+09	1.44433e+09	1.33175e+09	1.23227e+09	1.44984e+09	1.61208e+09	1.78882e+09	1.81383e+09	1.8147e+09	1.95911e+09	2.09491e+09	2.32625e+09	2.15488e+09	2.39317e+09
Ethiopia (Former)	General government final consumption expenditure
Fiji	General government final consumption expenditure	4.49429e+08	4.63278e+08	4.64893e+08	4.62285e+08	4.76866e+08	4.68963e+08	5.57604e+08	5.21869e+08	4.74595e+08	5.05606e+08	4.5222e+08	4.26857e+08	4.74617e+08	4.79988e+08
Finland	General government final consumption expenditure	4.00429e+10	4.0949e+10	4.19496e+10	4.24945e+10	4.31121e+10	4.39487e+10	4.44406e+10	4.50188e+10	4.5736e+10	4.64502e+10	4.63962e+10	4.6338e+10	4.66453e+10	4.73334e+10
France	General government final consumption expenditure	4.64127e+11	4.69129e+11	4.77659e+11	4.8692e+11	4.97648e+11	5.03986e+11	5.10786e+11	5.20037e+11	5.25984e+11	5.3867e+11	5.45526e+11	5.51171e+11	5.60369e+11	5.71316e+11
French Polynesia	General government final consumption expenditure	1.40726e+09	1.53301e+09	1.69207e+09	1.79211e+09	1.69211e+09	1.81197e+09	1.83959e+09	1.9087e+09	1.90795e+09	1.93651e+09	1.9143e+09	1.93345e+09	1.94256e+09	1.93201e+09
Gabon	General government final consumption expenditure	1.08151e+09	1.12228e+09	1.15146e+09	1.16482e+09	1.17136e+09	1.20075e+09	1.3325e+09	1.41856e+09	1.48771e+09	1.52007e+09	1.55511e+09	1.68105e+09	1.87272e+09	1.93815e+09
Gambia	General government final consumption expenditure	5.9334e+07	6.3528e+07	5.36573e+07	5.47736e+07	5.06885e+07	4.41449e+07	3.99143e+07	4.68474e+07	6.49831e+07	7.481e+07	7.59183e+07	7.29303e+07	5.7152e+07	5.95811e+07
Georgia	General government final consumption expenditure	3.84349e+08	4.54952e+08	4.87083e+08	5.39565e+08	8.21152e+08	1.11104e+09	1.07605e+09	1.72348e+09	2.08581e+09	1.89708e+09	1.73645e+09	1.60737e+09	1.66019e+09	1.6156e+09
Germany	General government final consumption expenditure	5.16231e+11	5.18907e+11	5.25188e+11	5.27863e+11	5.23734e+11	5.26235e+11	5.31469e+11	5.39379e+11	5.57525e+11	5.74159e+11	5.81604e+11	5.855e+11	5.9277e+11	5.97074e+11
Ghana	General government final consumption expenditure	2.02318e+09	2.06937e+09	1.82966e+09	2.07548e+09	1.79005e+09	1.69612e+09	1.99069e+09	2.02021e+09	2.2827e+09	2.7404e+09	3.12374e+09	4.6779e+09	4.9149e+09	4.5265e+09
Greece	General government final consumption expenditure	3.98985e+10	4.16532e+10	4.25532e+10	4.49968e+10	4.68886e+10	4.89007e+10	5.15891e+10	5.42279e+10	5.3063e+10	5.39272e+10	5.15943e+10	4.82011e+10	4.57955e+10	4.28349e+10
Greenland	General government final consumption expenditure	7.77596e+08	7.91397e+08	8.20771e+08	8.63111e+08	8.62277e+08	8.66279e+08	8.95795e+08	9.7e+08	9.9101e+08	1.0277e+09	1.01319e+09	1.00203e+09	1.00608e+09	1.04295e+09
Grenada	General government final consumption expenditure	6.53175e+07	6.8386e+07	6.98294e+07	7.21221e+07	8.29675e+07	9.07222e+07	8.70819e+07	9.4117e+07	1.07242e+08	1.04216e+08	1.07382e+08	1.06172e+08	1.05609e+08	1.04149e+08
Guatemala	General government final consumption expenditure	2.34301e+09	2.4688e+09	2.4666e+09	2.43076e+09	2.2693e+09	2.30699e+09	2.43877e+09	2.6406e+09	2.94003e+09	3.36144e+09	3.62339e+09	3.77318e+09	3.99349e+09	4.18611e+09
Guinea	General government final consumption expenditure	2.04289e+08	2.00816e+08	2.44594e+08	2.71011e+08	2.74534e+08	2.78926e+08	2.81973e+08	2.87325e+08	3.00992e+08	3.08517e+08	3.08517e+08	2.80442e+08	3.30921e+08	3.60373e+08
Guinea-Bissau	General government final consumption expenditure	9.1233e+07	8.79753e+07	8.2805e+07	9.46105e+07	7.91555e+07	8.72166e+07	8.6646e+07	9.19373e+07	7.67743e+07	1.02321e+08	1.08952e+08	1.20484e+08	1.29884e+08	9.95445e+07
Guyana	General government final consumption expenditure	2.19258e+08	1.86188e+08	1.95975e+08	2.14439e+08	2.03197e+08	2.22008e+08	2.09755e+08	2.24302e+08	2.33e+08	2.52149e+08	2.46005e+08	2.6503e+08	2.37213e+08	2.68935e+08
Haiti	General government final consumption expenditure	2.57325e+08	2.7103e+08	2.94781e+08	2.70275e+08	2.30202e+08	3.16464e+08	2.4626e+08	2.11037e+08	3.01384e+08	3.25205e+08	3.05236e+08	2.94987e+08	3.46211e+08	3.63613e+08
Honduras	General government final consumption expenditure	1.14672e+09	1.22006e+09	1.23698e+09	1.30529e+09	1.37532e+09	1.5147e+09	1.57308e+09	1.77407e+09	1.85105e+09	1.97969e+09	1.95957e+09	1.94079e+09	1.96536e+09	2.04497e+09
Hungary	General government final consumption expenditure	2.06506e+10	2.13788e+10	2.25307e+10	2.36571e+10	2.41878e+10	2.49419e+10	2.52815e+10	2.36024e+10	2.43424e+10	2.46801e+10	2.45428e+10	2.45477e+10	2.42256e+10	2.50092e+10
Iceland	General government final consumption expenditure	3.3311e+09	3.4656e+09	3.65746e+09	3.73124e+09	3.82327e+09	3.95893e+09	4.12285e+09	4.30798e+09	4.5093e+09	4.43102e+09	4.2975e+09	4.30781e+09	4.25613e+09	4.2916e+09
India	General government final consumption expenditure	7.72683e+10	7.90228e+10	7.87444e+10	8.07554e+10	8.3641e+10	9.10701e+10	9.45081e+10	1.03554e+11	1.14298e+11	1.30162e+11	1.37865e+11	1.47119e+11	1.56192e+11	1.62175e+11
Indonesia	General government final consumption expenditure	1.56323e+10	1.68147e+10	1.89995e+10	2.09058e+10	2.174e+10	2.31825e+10	2.54105e+10	2.63999e+10	2.9153e+10	3.37227e+10	3.3832e+10	3.49213e+10	3.53675e+10	3.70907e+10
Iran (Islamic Republic of)	General government final consumption expenditure	2.33468e+10	2.42463e+10	2.48783e+10	2.5838e+10	2.74244e+10	2.93382e+10	3.11322e+10	2.85655e+10	2.97367e+10	3.03581e+10	2.99191e+10	3.01056e+10	2.79515e+10	2.8412e+10
Iraq	General government final consumption expenditure	5.19481e+09	6.88334e+09	7.8181e+09	3.97995e+09	1.2422e+10	9.97513e+09	7.44053e+09	8.99481e+09	8.69195e+09	1.13592e+10	1.07872e+10	1.06667e+10	1.34079e+10	1.43335e+10
Ireland	General government final consumption expenditure	2.6027e+10	2.87452e+10	3.05602e+10	3.14967e+10	3.20383e+10	3.34552e+10	3.52603e+10	3.76414e+10	3.80807e+10	3.71031e+10	3.5327e+10	3.4534e+10	3.4098e+10	3.40858e+10
Israel	General government final consumption expenditure	3.2599e+10	3.38196e+10	3.55507e+10	3.46722e+10	3.406e+10	3.46282e+10	3.56748e+10	3.67334e+10	3.77519e+10	3.891e+10	4.01921e+10	4.12082e+10	4.25469e+10	4.38888e+10
Italy	General government final consumption expenditure	3.33996e+11	3.48125e+11	3.52179e+11	3.56911e+11	3.60346e+11	3.62652e+11	3.61289e+11	3.62568e+11	3.66075e+11	3.6744e+11	3.69533e+11	3.62818e+11	3.57297e+11	3.54824e+11
Jamaica	General government final consumption expenditure	1.45176e+09	1.50187e+09	1.56196e+09	1.56291e+09	1.43563e+09	1.5979e+09	1.6063e+09	1.74654e+09	1.76183e+09	1.64951e+09	1.65528e+09	1.6399e+09	1.64664e+09	1.62892e+09
Japan	General government final consumption expenditure	7.52968e+11	7.84417e+11	8.04807e+11	8.19906e+11	8.32387e+11	8.38955e+11	8.39184e+11	8.48511e+11	8.47441e+11	8.66689e+11	8.83113e+11	8.94015e+11	9.09365e+11	9.27169e+11
Jordan	General government final consumption expenditure	2.44309e+09	2.47114e+09	2.56878e+09	2.63093e+09	2.52077e+09	2.45867e+09	2.83182e+09	3.0418e+09	3.75935e+09	4.15229e+09	3.69795e+09	3.45808e+09	3.49355e+09	3.74896e+09
Kazakhstan	General government final consumption expenditure	4.36822e+09	5.2037e+09	4.81577e+09	5.24279e+09	5.79711e+09	6.42557e+09	6.67332e+09	7.6582e+09	7.74077e+09	7.74903e+09	7.97062e+09	8.8339e+09	9.95559e+09	9.96782e+09
Kenya	General government final consumption expenditure	2.80212e+09	2.8384e+09	2.88524e+09	3.05837e+09	3.07617e+09	3.05208e+09	3.12345e+09	3.3779e+09	3.66672e+09	3.98439e+09	4.12982e+09	4.29983e+09	4.61514e+09	4.6666e+09
Kiribati	General government final consumption expenditure	4.14904e+07	4.01069e+07	4.29947e+07	4.15206e+07	4.15921e+07	4.95156e+07	4.31946e+07	4.33766e+07	4.39397e+07	4.40901e+07	4.16349e+07	4.32387e+07	4.88575e+07	4.68777e+07
Kosovo	General government final consumption expenditure	1.0332e+09	1.06272e+09	9.65002e+08	9.21231e+08	8.66262e+08	8.77357e+08	8.19032e+08	7.9143e+08	7.98461e+08	7.5205e+08	7.18401e+08	6.98347e+08	6.91718e+08	7.51046e+08
Kuwait	General government final consumption expenditure	1.00823e+10	9.99306e+09	1.1048e+10	1.14861e+10	1.20095e+10	1.26952e+10	1.4452e+10	1.55028e+10	1.68864e+10	1.79372e+10	1.72023e+10	1.84564e+10	2.12167e+10	1.91482e+10
Kyrgyzstan	General government final consumption expenditure	4.24616e+08	4.19196e+08	4.18267e+08	4.23447e+08	4.42876e+08	4.30786e+08	4.37067e+08	4.44805e+08	4.51234e+08	4.57961e+08	4.53009e+08	4.63136e+08	4.72709e+08	4.73883e+08
Lao People's DR	General government final consumption expenditure	2.21255e+08	2.36011e+08	2.45097e+08	2.13127e+08	2.19548e+08	2.23372e+08	2.50032e+08	2.72616e+08	3.27673e+08	4.01164e+08	3.8428e+08	4.29447e+08	5.43824e+08	5.23702e+08
Latvia	General government final consumption expenditure	2.50338e+09	2.64107e+09	2.73308e+09	2.85443e+09	2.95822e+09	3.03863e+09	3.23557e+09	3.34272e+09	3.42364e+09	3.05833e+09	2.80962e+09	2.89725e+09	2.90929e+09	2.99391e+09
Lebanon	General government final consumption expenditure	2.71563e+09	2.84055e+09	2.98542e+09	3.0302e+09	2.93929e+09	2.99967e+09	3.06663e+09	3.24063e+09	3.35535e+09	3.81751e+09	3.71212e+09	3.74341e+09	4.25058e+09	4.25991e+09
Lesotho	General government final consumption expenditure	4.42884e+08	4.55883e+08	5.09282e+08	5.14314e+08	4.82987e+08	5.02153e+08	5.16205e+08	5.42428e+08	5.9052e+08	5.8341e+08	5.945e+08	5.87211e+08	6.59362e+08	7.33296e+08
Liberia	General government final consumption expenditure	40755519	44999183	31261890	25619061	61397290	69075733	64505099	103760857	161848522	156252426	156430646	177428472	194437720	203690035
Libya	General government final consumption expenditure	5.09543e+09	5.47982e+09	4.14202e+09	4.43107e+09	4.65262e+09	4.78755e+09	5.3429e+09	5.57799e+09	5.67282e+09	5.68416e+09	5.90585e+09	2.28644e+09	4.68312e+09	3.92005e+09
Liechtenstein	General government final consumption expenditure	4.07253e+08	4.07488e+08	4.09433e+08	4.10814e+08	4.14879e+08	4.1132e+08	4.47591e+08	4.7044e+08	4.39088e+08	4.15672e+08	4.34506e+08	4.1794e+08	4.32372e+08	4.38709e+08
Lithuania	General government final consumption expenditure	4.15849e+09	4.21507e+09	4.31873e+09	4.4448e+09	4.62625e+09	4.78019e+09	4.87187e+09	4.97148e+09	4.97663e+09	4.90893e+09	4.73583e+09	4.74888e+09	4.80794e+09	4.89542e+09
Luxembourg	General government final consumption expenditure	4.93372e+09	5.27757e+09	5.52206e+09	5.72489e+09	5.92449e+09	6.16363e+09	6.20343e+09	6.28874e+09	6.43623e+09	6.69664e+09	6.90668e+09	6.99212e+09	7.24954e+09	7.61143e+09
Madagascar	General government final consumption expenditure	3.47172e+08	4.19064e+08	3.62124e+08	4.68501e+08	4.15028e+08	4.513e+08	3.99288e+08	5.82875e+08	4.84278e+08	4.82963e+08	5.19904e+08	4.91022e+08	4.74355e+08	4.1174e+08
Malawi	General government final consumption expenditure	3.36926e+08	3.32764e+08	3.44324e+08	3.64939e+08	4.45987e+08	4.6437e+08	4.49402e+08	6.16829e+08	6.79807e+08	7.01991e+08	6.18353e+08	7.91479e+08	8.11202e+08	8.58748e+08
Malaysia	General government final consumption expenditure	1.02173e+10	1.18217e+10	1.32273e+10	1.43658e+10	1.54637e+10	1.64686e+10	1.73727e+10	1.85232e+10	1.97962e+10	2.07745e+10	2.14896e+10	2.48835e+10	2.61575e+10	2.78052e+10
Maldives	General government final consumption expenditure	1.72054e+08	1.79657e+08	1.97672e+08	2.04e+08	2.26566e+08	2.55209e+08	2.91062e+08	3.65635e+08	4.2958e+08	4.19899e+08	4.08823e+08	3.73448e+08	3.69299e+08	5.88822e+08
Mali	General government final consumption expenditure	6.54155e+08	6.91079e+08	7.07651e+08	8.38818e+08	9.04527e+08	9.29714e+08	1.0198e+09	1.06319e+09	1.14824e+09	1.1827e+09	1.24183e+09	1.28902e+09	1.22457e+09	1.32866e+09
Malta	General government final consumption expenditure	1.10206e+09	1.10962e+09	1.14302e+09	1.176e+09	1.17684e+09	1.15762e+09	1.21381e+09	1.22505e+09	1.37577e+09	1.32987e+09	1.35108e+09	1.38994e+09	1.47649e+09	1.48447e+09
Marshall Islands	General government final consumption expenditure	6.22209e+07	6.45019e+07	6.71315e+07	6.92526e+07	7.39103e+07	75405577	7.60686e+07	7.70709e+07	7.81865e+07	7.67636e+07	8.1261e+07	8.17471e+07	8.43669e+07	8.50588e+07
Mauritania	General government final consumption expenditure	3.32732e+08	3.39115e+08	4.62968e+08	5.65793e+08	5.56088e+08	5.50627e+08	6.16632e+08	6.99691e+08	6.43188e+08	6.14253e+08	6.75679e+08	6.86359e+08	6.95227e+08	7.22341e+08
Mauritius	General government final consumption expenditure	7.65488e+08	7.9603e+08	8.44418e+08	8.66963e+08	9.03107e+08	9.42324e+08	9.82805e+08	9.89004e+08	9.72659e+08	1.02261e+09	1.0568e+09	1.08789e+09	1.11951e+09	1.12636e+09
Mexico	General government final consumption expenditure	8.91619e+10	8.73959e+10	8.71075e+10	8.78087e+10	8.99058e+10	9.26463e+10	9.57945e+10	9.81441e+10	1.01122e+11	1.03396e+11	1.05165e+11	1.0781e+11	1.11344e+11	1.12611e+11
Micronesia (FS of)	General government final consumption expenditure	1.20815e+08	1.24978e+08	1.22717e+08	1.27277e+08	1.27553e+08	1.27773e+08	1.27656e+08	1.20941e+08	1.24105e+08	1.27343e+08	1.26452e+08	1.28499e+08	1.24598e+08	1.30269e+08
Monaco	General government final consumption expenditure	8.55031e+08	8.65266e+08	8.9823e+08	9.22455e+08	9.44555e+08	9.61252e+08	1.00435e+09	1.13307e+09	1.14679e+09	1.07916e+09	1.09811e+09	1.16045e+09	1.18107e+09	1.30816e+09
Mongolia	General government final consumption expenditure	2.95005e+08	3.14624e+08	3.03146e+08	2.87131e+08	2.82956e+08	2.85824e+08	3.01415e+08	3.51443e+08	3.69386e+08	3.47368e+08	3.95835e+08	4.44304e+08	5.25318e+08	3.81202e+08
Montenegro	General government final consumption expenditure	3.44042e+08	4.54471e+08	4.49935e+08	5.2666e+08	5.4828e+08	6.75795e+08	7.03642e+08	6.32132e+08	6.34271e+08	6.38956e+08	6.36728e+08	6.26295e+08	6.45589e+08	6.54394e+08
Montserrat	General government final consumption expenditure	2.15019e+07	2.25025e+07	1.97717e+07	2.25143e+07	2.47668e+07	2.31407e+07	2.46457e+07	2.71169e+07	2.75645e+07	2.63367e+07	2.44752e+07	2.41108e+07	2.58843e+07	2.81902e+07
Morocco	General government final consumption expenditure	9.90893e+09	1.03728e+10	1.0433e+10	1.0661e+10	1.11247e+10	1.15183e+10	1.18479e+10	1.23582e+10	1.29572e+10	1.45198e+10	1.43855e+10	1.50408e+10	1.62353e+10	1.68348e+10
Mozambique	General government final consumption expenditure	7.66683e+08	8.91893e+08	1.11814e+09	1.21558e+09	1.32667e+09	1.39743e+09	1.5404e+09	1.6514e+09	1.7881e+09	1.91093e+09	2.14301e+09	2.35296e+09	2.6444e+09	3.02608e+09
Myanmar	General government final consumption expenditure	1.20366e+09	9.84854e+08	7.50662e+08	6.87245e+08	8.10157e+08	1.07907e+09	1.36635e+09	1.31982e+09	1.2791e+09	1.50375e+09	1.609e+09	1.82684e+09	3.54306e+09	4.04379e+09
Namibia	General government final consumption expenditure	1.37127e+09	1.41117e+09	1.37487e+09	1.41802e+09	1.48839e+09	1.40038e+09	1.5541e+09	1.74949e+09	1.90042e+09	1.98601e+09	2.02464e+09	2.17031e+09	2.22154e+09	2.42017e+09
Nauru	General government final consumption expenditure	1.41047e+07	1.33479e+07	1.28445e+07	1.1937e+07	1.16411e+07	1.00351e+07	8.21272e+06	9.34903e+06	1.62074e+07	1.30299e+07	1.58732e+07	1.80603e+07	2.08443e+07	2.71178e+07
Nepal	General government final consumption expenditure	5.45244e+08	5.59912e+08	6.03738e+08	6.67357e+08	7.25954e+08	7.34966e+08	7.40521e+08	7.93578e+08	8.19536e+08	8.99083e+08	9.10943e+08	1.03036e+09	1.19451e+09	1.09795e+09
Netherlands	General government final consumption expenditure	1.32284e+11	1.36928e+11	1.43543e+11	1.47954e+11	1.48529e+11	1.51373e+11	1.66836e+11	1.72224e+11	1.79252e+11	1.86393e+11	1.88381e+11	1.87915e+11	1.84937e+11	1.84472e+11
Netherlands Antilles (former)	General government final consumption expenditure	7.05829e+08	5.04989e+08	5.2288e+08	5.78215e+08	5.87183e+08	5.43309e+08	5.61177e+08	6.02021e+08	5.91145e+08	5.98587e+08	5.98863e+08	5.95708e+08	5.99312e+08
New Caledonia	General government final consumption expenditure	1.41727e+09	1.52589e+09	1.56998e+09	1.57538e+09	1.54257e+09	1.59389e+09	1.64297e+09	1.57532e+09	1.72805e+09	1.84894e+09	1.81329e+09	1.87192e+09	1.95573e+09	1.97206e+09
New Zealand	General government final consumption expenditure	1.64925e+10	1.71341e+10	1.74217e+10	1.82403e+10	1.91121e+10	2.04799e+10	2.13305e+10	2.23388e+10	2.32305e+10	2.31055e+10	2.35024e+10	2.40159e+10	2.36806e+10	2.40721e+10
Nicaragua	General government final consumption expenditure	8.6082e+08	8.52456e+08	8.55334e+08	8.88418e+08	9.17032e+08	9.70787e+08	9.89399e+08	9.61718e+08	1.03843e+09	1.04341e+09	1.04771e+09	1.10618e+09	1.13488e+09	1.16408e+09
Niger	General government final consumption expenditure	5.13453e+08	5.25606e+08	5.41474e+08	5.53725e+08	5.05549e+08	5.31122e+08	5.61427e+08	5.8211e+08	6.34381e+08	7.01654e+08	6.49171e+08	6.88384e+08	7.13854e+08	7.68106e+08
Nigeria	General government final consumption expenditure	1.70794e+09	1.50165e+09	1.58843e+09	1.20838e+09	8.04223e+09	8.88416e+09	1.20603e+10	1.89106e+10	2.34522e+10	2.36219e+10	2.64339e+10	2.76429e+10	2.7095e+10	2.74707e+10
Norway	General government final consumption expenditure	5.36224e+10	5.58212e+10	5.74226e+10	5.81698e+10	5.89361e+10	6.00282e+10	6.11905e+10	6.24393e+10	6.39491e+10	6.65846e+10	6.80326e+10	6.86955e+10	6.97648e+10	7.09172e+10
Oman	General government final consumption expenditure	4.49303e+09	4.83454e+09	5.11964e+09	5.07847e+09	5.74386e+09	6.46202e+09	6.84745e+09	7.22347e+09	7.45316e+09	8.0171e+09	8.47315e+09	9.57179e+09	1.0529e+10	1.2178e+10
Pakistan	General government final consumption expenditure	7.42663e+09	7.00844e+09	8.06167e+09	8.64237e+09	8.76575e+09	8.91171e+09	1.32182e+10	1.30754e+10	1.29543e+10	1.45941e+10	1.45098e+10	1.45129e+10	1.55773e+10	1.70852e+10
Palau	General government final consumption expenditure	6.41943e+07	6.45631e+07	6.32188e+07	6.01947e+07	5.57423e+07	54963432	5.59634e+07	6.0051e+07	6.06465e+07	5.93463e+07	5.81969e+07	5.79361e+07	6.18097e+07	6.16638e+07
Panama	General government final consumption expenditure	1.61806e+09	1.74837e+09	1.90756e+09	1.9157e+09	1.95247e+09	2.0338e+09	2.09632e+09	2.18232e+09	2.23862e+09	2.32929e+09	2.68658e+09	2.72898e+09	2.88936e+09	3.03232e+09
Papua New Guinea	General government final consumption expenditure	6.35072e+08	6.80058e+08	7.56376e+08	6.50313e+08	7.7715e+08	7.85828e+08	8.6967e+08	9.5958e+08	9.91564e+08	1.04447e+09	1.01742e+09	1.25855e+09	1.40599e+09	1.60762e+09
Paraguay	General government final consumption expenditure	7.9134e+08	7.23139e+08	7.00245e+08	6.8624e+08	7.2763e+08	8.10949e+08	8.43304e+08	8.68603e+08	8.99004e+08	1.02193e+09	1.14456e+09	1.20522e+09	1.45832e+09	1.52432e+09
Peru	General government final consumption expenditure	7.43853e+09	7.37889e+09	7.37889e+09	7.66656e+09	7.98084e+09	8.70703e+09	9.36862e+09	9.77148e+09	1.02983e+10	1.16387e+10	1.22892e+10	1.28818e+10	1.39258e+10	1.48519e+10
Philippines	General government final consumption expenditure	9.41015e+09	9.25937e+09	8.89162e+09	9.21214e+09	9.39681e+09	9.59005e+09	1.06078e+10	1.13402e+10	1.1373e+10	1.26135e+10	1.31176e+10	1.33912e+10	1.50238e+10	1.6174e+10
Poland	General government final consumption expenditure	4.82618e+10	4.95424e+10	5.02252e+10	5.19695e+10	5.39502e+10	5.59116e+10	5.896e+10	6.07574e+10	6.38834e+10	6.61666e+10	6.83446e+10	6.6774e+10	6.69249e+10	6.82982e+10
Portugal	General government final consumption expenditure	3.64595e+10	3.77647e+10	3.8755e+10	3.93677e+10	4.05175e+10	4.16067e+10	4.15125e+10	4.17761e+10	4.19525e+10	4.30531e+10	4.24884e+10	4.0866e+10	3.91229e+10	3.83622e+10
Puerto Rico	General government final consumption expenditure	9.16585e+09	9.67536e+09	9.90598e+09	9.96498e+09	1.0373e+10	10329600000	1.02433e+10	9.76282e+09	1.00084e+10	9.6722e+09	9.46308e+09	9.57729e+09	9.50598e+09	9.38661e+09
Qatar	General government final consumption expenditure	5.23543e+09	5.06257e+09	4.5653e+09	4.51719e+09	4.34987e+09	6.36593e+09	8.50572e+09	8.77633e+09	9.35824e+09	1.24352e+10	1.39641e+10	1.53785e+10	1.60605e+10	1.74407e+10
Republic of Korea	General government final consumption expenditure	9.3805e+10	9.96402e+10	1.05227e+11	1.09184e+11	1.14129e+11	1.19298e+11	1.28096e+11	1.35861e+11	1.42765e+11	1.50247e+11	1.56029e+11	1.5948e+11	1.64861e+11	1.69316e+11
Republic of Moldova	General government final consumption expenditure	4.16897e+08	3.9091e+08	5.09306e+08	5.20399e+08	4.28835e+08	4.91211e+08	5.36319e+08	5.64781e+08	5.93233e+08	5.81152e+08	5.74759e+08	5.6911e+08	5.7261e+08	5.68271e+08
Romania	General government final consumption expenditure	1.78885e+10	1.70415e+10	1.63232e+10	1.79202e+10	1.64067e+10	1.70146e+10	1.61997e+10	1.6251e+10	1.73456e+10	1.79813e+10	1.70789e+10	1.71888e+10	1.72551e+10	1.69769e+10
Russian Federation	General government final consumption expenditure	1.19439e+11	1.18501e+11	1.21572e+11	1.24429e+11	1.2707e+11	1.28902e+11	1.31881e+11	1.35473e+11	1.40022e+11	1.3916e+11	1.3709e+11	1.39011e+11	1.45393e+11	1.46052e+11
Rwanda	General government final consumption expenditure	2.55495e+08	2.83152e+08	3.22827e+08	3.60968e+08	3.95516e+08	4.32984e+08	4.73847e+08	4.79184e+08	4.90141e+08	5.47653e+08	6.03956e+08	6.30966e+08	7.23508e+08	7.30719e+08
Saint Kitts and Nevis	General government final consumption expenditure	4.03816e+07	4.00196e+07	3.67389e+07	4.36338e+07	5.25893e+07	5.72435e+07	5.05105e+07	5.36944e+07	6.27345e+07	6.18014e+07	5.97323e+07	5.83137e+07	5.82297e+07	6.75674e+07
Saint Lucia	General government final consumption expenditure	1.05212e+08	1.01251e+08	1.11455e+08	1.16208e+08	1.13823e+08	1.16122e+08	1.08254e+08	1.60974e+08	1.81811e+08	1.94115e+08	1.9882e+08	1.98354e+08	2.00092e+08	1.98955e+08
Samoa	General government final consumption expenditure	8.07061e+07	8.64046e+07	8.83388e+07	9.10182e+07	9.34588e+07	9.71364e+07	9.67482e+07	1.01758e+08	9.61039e+07	9.29902e+07	9.143e+07	9.0902e+07	9.05041e+07	8.96656e+07
San Marino	General government final consumption expenditure	2.64475e+08	2.62048e+08	2.59063e+08	2.62116e+08	2.63034e+08	2.71131e+08	2.80442e+08	2.6834e+08	2.95798e+08	3.09826e+08	3.14383e+08	2.94719e+08	3.15102e+08	2.70865e+08
Sao Tome and Principe	General government final consumption expenditure	8.98008e+06	1.42691e+07	1.64414e+07	1.26951e+07	1.89136e+07	1.6045e+07	1.78284e+07	2.0155e+07	2.04433e+07	2.07541e+07	1.99447e+07	2.1979e+07	1.9935e+07	2.24061e+07
Saudi Arabia	General government final consumption expenditure	5.21645e+10	5.23581e+10	5.26624e+10	5.57476e+10	6.20895e+10	7.00945e+10	7.85322e+10	8.04163e+10	8.58161e+10	8.66333e+10	8.94077e+10	9.99058e+10	1.10113e+11	1.21621e+11
Senegal	General government final consumption expenditure	9.50707e+08	9.59591e+08	9.9205e+08	1.01801e+09	1.07572e+09	1.13328e+09	1.19065e+09	1.27756e+09	1.2857e+09	1.30687e+09	1.34039e+09	1.41331e+09	1.4545e+09	1.44928e+09
Serbia	General government final consumption expenditure	4.27134e+09	4.45929e+09	4.67953e+09	4.83622e+09	5.02326e+09	5.12154e+09	5.19714e+09	5.29452e+09	5.50668e+09	5.41293e+09	5.41744e+09	5.46598e+09	5.57316e+09	5.51165e+09
Seychelles	General government final consumption expenditure	3.91509e+08	3.77071e+08	4.33326e+08	3.80862e+08	3.27899e+08	3.17395e+08	3.96124e+08	5.19904e+08	3.57401e+08	3.5934e+08	3.54238e+08	3.9123e+08	4.02159e+08	4.37398e+08
Sierra Leone	General government final consumption expenditure	1.05665e+08	1.29944e+08	1.74523e+08	1.70474e+08	1.57086e+08	1.63171e+08	1.78137e+08	1.57642e+08	1.77686e+08	1.96988e+08	2.04237e+08	2.08387e+08	2.40592e+08	2.63262e+08
Singapore	General government final consumption expenditure	1.09363e+10	1.15366e+10	1.21863e+10	1.22478e+10	1.25141e+10	1.31606e+10	1.38148e+10	1.42495e+10	1.52523e+10	1.58982e+10	1.76359e+10	1.7651e+10	1.73135e+10	1.9249e+10
Sint Maarten (Dutch part)	General government final consumption expenditure						1.57542e+08	1.77052e+08	1.72115e+08	1.71846e+08	1.78393e+08	1.76782e+08	1.82485e+08	2.03013e+08	1.9113e+08
Slovakia	General government final consumption expenditure	7.53542e+09	7.9447e+09	8.22247e+09	8.65768e+09	8.39642e+09	8.8832e+09	9.62134e+09	9.55336e+09	1.00838e+10	1.07856e+10	1.09643e+10	1.07514e+10	1.05138e+10	1.07556e+10
Slovenia	General government final consumption expenditure	5.90809e+09	6.07346e+09	6.26974e+09	6.43831e+09	6.61179e+09	6.78932e+09	7.00164e+09	7.13745e+09	7.48913e+09	7.66953e+09	7.68017e+09	7.57764e+09	7.46599e+09	7.38204e+09
Solomon Islands	General government final consumption expenditure	1.12297e+08	9.4463e+07	8.70049e+07	7.84255e+07	1.04865e+08	1.65036e+08	1.75278e+08	2.48021e+08	2.50711e+08	2.22086e+08	2.30932e+08	1.54204e+08	1.49242e+08	1.55599e+08
Somalia	General government final consumption expenditure	1.91391e+08	1.9087e+08	1.95642e+08	1.97207e+08	1.98785e+08	2.00574e+08	2.096e+08	2.13582e+08	2.18708e+08	2.25269e+08	2.30676e+08	2.36673e+08	2.42985e+08	2.49194e+08
South Africa	General government final consumption expenditure	3.98259e+10	4.10695e+10	4.29469e+10	4.5375e+10	4.77514e+10	5.02092e+10	5.26594e+10	5.47819e+10	5.79572e+10	6.06504e+10	6.24489e+10	6.35205e+10	6.56903e+10	6.78419e+10
South Sudan	General government final consumption expenditure									1.01701e+09	9.02079e+08	1.15323e+09	9.736e+08	9.07453e+08	1.00667e+09
Spain	General government final consumption expenditure	1.57601e+11	1.63598e+11	1.69969e+11	1.78339e+11	1.89648e+11	2.00331e+11	2.10287e+11	2.23281e+11	2.36513e+11	2.4629e+11	2.50011e+11	2.49376e+11	2.40194e+11	2.33151e+11
Sri Lanka	General government final consumption expenditure	2.57988e+09	2.53663e+09	2.49153e+09	2.6104e+09	2.85199e+09	3.19446e+09	3.50058e+09	3.75985e+09	4.12745e+09	4.78785e+09	4.86387e+09	5.13216e+09	5.10342e+09	5.28715e+09
St. Vincent and the Grenadines	General government final consumption expenditure	7.89483e+07	7.8112e+07	8.49887e+07	7.99643e+07	8.431e+07	8.67148e+07	8.9296e+07	9.63592e+07	1.05186e+08	1.05172e+08	9.11691e+07	1.00866e+08	1.0753e+08	1.10452e+08
State of Palestine	General government final consumption expenditure	1.0673e+09	1.07829e+09	9.13562e+08	9.10965e+08	1.22574e+09	1363300000	1.44302e+09	1.4599e+09	1.56909e+09	1.69826e+09	1.79156e+09	1.92362e+09	1.98786e+09	1.92992e+09
Sudan	General government final consumption expenditure									1.22988e+09	1.02609e+09	8.73692e+08	1.12395e+09	9.93321e+08	1.00639e+09
Sudan (Former)	General government final consumption expenditure	1.67065e+09	2.23462e+09	2.29287e+09	2.63317e+09	2.72097e+09	2.27228e+09	2.34844e+09	2.3421e+09	2.24689e+09	1.91684e+09	1.93588e+09
Suriname	General government final consumption expenditure	2.45495e+08	2.81673e+08	2.95455e+08	3.2585e+08	2.96819e+08	2.70351e+08	2.93863e+08	2.46781e+08	2.76715e+08	3.44696e+08	3.6646e+08	3.60954e+08	3.87405e+08	3.96632e+08
Swaziland	General government final consumption expenditure	4.24528e+08	4.03144e+08	3.83687e+08	3.64224e+08	3.81219e+08	3.93281e+08	3.70581e+08	3.92203e+08	3.79887e+08	3.90952e+08	4.11688e+08	4.39082e+08	2.276e+08	2.46389e+08
Sweden	General government final consumption expenditure	9.37862e+10	9.39474e+10	9.59196e+10	9.6563e+10	9.6341e+10	9.66992e+10	9.82576e+10	9.87504e+10	1.0007e+11	1.02326e+11	1.03671e+11	1.04527e+11	1.05685e+11	1.07326e+11
Switzerland	General government final consumption expenditure	4.22711e+10	4.32242e+10	4.39294e+10	4.49709e+10	4.53293e+10	4.58213e+10	4.58888e+10	4.59496e+10	4.5087e+10	4.66788e+10	4.67725e+10	4.77402e+10	4.91212e+10	4.9832e+10
Syrian Arab Republic	General government final consumption expenditure	2.74727e+09	2.80099e+09	2.93744e+09	3.24023e+09	3.82156e+09	3.89508e+09	3.95427e+09	4.88592e+09	4.86115e+09	5.70277e+09	6.31641e+09	6.77119e+09	6.33106e+09	5.82458e+09
Tajikistan	General government final consumption expenditure	2.89797e+08	3.21051e+08	3.21412e+08	3.29091e+08	3.36351e+08	3.37647e+08	3.46086e+08	3.53364e+08	3.80422e+08	4.06686e+08	4.1034e+08	4.42349e+08	4.51636e+08	4.56747e+08
TFYR of Macedonia	General government final consumption expenditure	1.03091e+09	1.39646e+09	1.17639e+09	1.00848e+09	1.00154e+09	1.01296e+09	1.06578e+09	1.10565e+09	1.21818e+09	1.22017e+09	1.17595e+09	1.18997e+09	1.21893e+09	1.2329e+09
Thailand	General government final consumption expenditure	2.05384e+10	2.10776e+10	2.19145e+10	2.30377e+10	2.39353e+10	2.58488e+10	2.64342e+10	2.86946e+10	3.01081e+10	3.28223e+10	3.58888e+10	3.70251e+10	3.91699e+10	4.10856e+10
Timor-Leste	General government final consumption expenditure	5.65088e+08	7.42925e+08	7.07194e+08	5.10593e+08	3.53878e+08	246849650	3.63446e+08	5.18228e+08	5.79811e+08	6.89767e+08	6.97508e+08	6.9031e+08	7.15576e+08	7.05579e+08
Togo	General government final consumption expenditure	2.60054e+08	2.55409e+08	2.3232e+08	2.37518e+08	2.59396e+08	2.85045e+08	2.99056e+08	2.78264e+08	3.26492e+08	2.89565e+08	2.98435e+08	2.85663e+08	3.39677e+08	4.39972e+08
Tonga	General government final consumption expenditure	4.04782e+07	4.41424e+07	4.14397e+07	4.32348e+07	4.13653e+07	4.07609e+07	4.52027e+07	3.95523e+07	4.20602e+07	4.45077e+07	4.06401e+07	4.05797e+07	4.49307e+07	4.59883e+07
Trinidad and Tobago	General government final consumption expenditure	1.59479e+09	1.62492e+09	1.61167e+09	1.61349e+09	1.7623e+09	1.85838e+09	1.95369e+09	2.04225e+09	2.03004e+09	2.87542e+09	2.58421e+09	2.57818e+09	2.35392e+09	2.57799e+09
Tunisia	General government final consumption expenditure	4.33842e+09	4.45971e+09	4.7409e+09	5.09178e+09	5.31327e+09	5.46022e+09	5.84053e+09	6.15968e+09	6.42768e+09	6.80313e+09	7.05741e+09	7.5074e+09	7.885e+09	8.37387e+09
Turkey	General government final consumption expenditure	5.13763e+10	5.08312e+10	5.37942e+10	5.23895e+10	5.5553e+10	5.69363e+10	6.17391e+10	6.57702e+10	6.69202e+10	7.21262e+10	7.35512e+10	7.69913e+10	8.17238e+10	8.67818e+10
Turkmenistan	General government final consumption expenditure	1.57333e+09	1.31974e+09	1.28428e+09	1.44007e+09	1.59362e+09	1.87931e+09	1.58495e+09	1.58194e+09	1.46679e+09	2.08296e+09	2.20422e+09	2.41422e+09	2.60784e+09	2.96961e+09
Turks and Caicos Islands	General government final consumption expenditure	5.98641e+07	6.80392e+07	6.16975e+07	7.22168e+07	1.03755e+08	99406700	1.31233e+08	1.57631e+08	1.51641e+08	1.29329e+08	1.56755e+08	1.48163e+08	1.30654e+08	1.4238e+08
Tuvalu	General government final consumption expenditure	3.28018e+07	1.84847e+07	1.90454e+07	1.91854e+07	1.60387e+07	1.62668e+07	1.71773e+07	1.60617e+07	1.73951e+07	1.90228e+07	2.07408e+07	2.02726e+07	1.956e+07	2.02754e+07
U.R. of Tanzania: Mainland	General government final consumption expenditure	1.47151e+09	1.55981e+09	1.84606e+09	2.38141e+09	2.72986e+09	3.05562e+09	3.30627e+09	3.62037e+09	3.42434e+09	3.86231e+09	3.48628e+09	3.67138e+09	4.15963e+09	4.91096e+09
Uganda	General government final consumption expenditure	1.16754e+09	1.29419e+09	1.39051e+09	1.45364e+09	1.50796e+09	1.57567e+09	1.63444e+09	1.60965e+09	1.63771e+09	1.86401e+09	2.71845e+09	1.90339e+09	1.82416e+09	2.07797e+09
Ukraine	General government final consumption expenditure	1.34843e+10	1.49144e+10	1.39666e+10	1.49072e+10	1.52187e+10	1.5641e+10	1.60211e+10	1.64076e+10	1.66124e+10	1.62956e+10	1.69898e+10	1.65344e+10	1.72382e+10	1.64513e+10
United Arab Emirates	General government final consumption expenditure	9.84749e+09	1.04651e+10	1.10624e+10	1.172e+10	1.22679e+10	1.23771e+10	1.26726e+10	1.25737e+10	1.32708e+10	1.93831e+10	1.754e+10	1.79725e+10	1.81931e+10	1.89622e+10
United Kingdom	General government final consumption expenditure	4.08683e+11	4.24862e+11	4.4287e+11	4.63046e+11	4.7587e+11	4.86827e+11	4.97572e+11	5.0344e+11	5.13525e+11	5.19534e+11	5.19681e+11	5.19767e+11	5.31889e+11	5.35815e+11
United States	General government final consumption expenditure	1.76693e+12	1.82945e+12	1.90021e+12	1.93439e+12	1.96433e+12	1980050000000	2.00185e+12	2.02979e+12	2.08121e+12	2.15917e+12	2.16165e+12	2.10429e+12	2.09183e+12	2.06467e+12
Uruguay	General government final consumption expenditure	2.0357e+09	1.97996e+09	1.88303e+09	1.92505e+09	1.8736e+09	1.89872e+09	1.93812e+09	2.02831e+09	2.21694e+09	2.33146e+09	2.404e+09	2.49429e+09	2.60855e+09	2.71811e+09
USSR (Former)	General government final consumption expenditure
Uzbekistan	General government final consumption expenditure	2.04988e+09	2.09254e+09	2.15084e+09	2.25968e+09	2.34102e+09	2.53369e+09	2.74749e+09	2.82469e+09	3.95631e+09	4.32929e+09	5.03627e+09	5.31606e+09	4.42308e+09	4.70255e+09
Vanuatu	General government final consumption expenditure	5.71048e+07	5.43171e+07	5.37634e+07	5.3394e+07	5.23521e+07	5.23132e+07	5.32074e+07	5.91089e+07	5.87824e+07	6.68611e+07	6.97691e+07	6.92015e+07	6.8284e+07	7.24336e+07
Venezuela	General government final consumption expenditure	1.15482e+10	1.23491e+10	1.20419e+10	1.27287e+10	1.45393e+10	1.60878e+10	1.7636e+10	2.00611e+10	2.10196e+10	2.13431e+10	2.18007e+10	2.30914e+10	2.45363e+10	2.53565e+10
Viet Nam	General government final consumption expenditure	2.31941e+09	2.4726e+09	2.60558e+09	2.79296e+09	3.01009e+09	3.25697e+09	3.53372e+09	3.84836e+09	4.13783e+09	4.45208e+09	4.99898e+09	5.35506e+09	5.73998e+09	6.1567e+09
Yemen	General government final consumption expenditure	1.67351e+09	1.77446e+09	1.87317e+09	1.97188e+09	2.07283e+09	2.17153e+09	2.27248e+09	2.37118e+09	2.46989e+09	2.5686e+09	2.6673e+09	2.76601e+09	2.86472e+09	2.71838e+09
Yemen Arab Republic (Former)	General government final consumption expenditure
Yemen Democratic (Former)	General government final consumption expenditure
Yugoslavia (Former)	General government final consumption expenditure
Zambia	General government final consumption expenditure	4.8497e+08	5.55145e+08	6.5879e+08	8.35544e+08	1.164e+09	1.3266e+09	1.45684e+09	1.5214e+09	1.80663e+09	1.79092e+09	1.94578e+09	2.11605e+09	2.2372e+09	2.39234e+09
Zanzibar	General government final consumption expenditure	3.49402e+07	3.87743e+07	4.66468e+07	5.77085e+07	6.76856e+07	7.3753e+07	7.80071e+07	9.15062e+07	8.30637e+07	9.59028e+07	8.69165e+07	8.90295e+07	9.8292e+07	1.13405e+08
Zimbabwe	General government final consumption expenditure	1.06209e+09	9.17581e+08	8.87019e+08	9.06286e+08	9.2594e+08	946588280	9.30429e+08	7.53806e+08	7.53805e+08	5.19315e+08	8.32965e+08	1.30709e+09	1.38147e+09	1.45177e+09
Afghanistan	Gross capital formation	6.67651e+08	7.01342e+08	9.61282e+08	1.08095e+09	1.32936e+09	1.4441e+09	1.44245e+09	1.52083e+09	1.5022e+09	1.57792e+09	1.37168e+09	1.39197e+09	1.28193e+09	1.2463e+09
Albania	Gross capital formation	1.79077e+09	2.23141e+09	2.33175e+09	2.75035e+09	2.82503e+09	2.96212e+09	3.34679e+09	3.52934e+09	3.66912e+09	3.71612e+09	3.43852e+09	3.65368e+09	3.35875e+09	3.25303e+09
Algeria	Gross capital formation	2.34383e+10	2.4704e+10	2.67791e+10	2.79306e+10	3.0221e+10	3.26689e+10	3.46943e+10	3.81984e+10	4.29351e+10	4.67133e+10	4.99833e+10	5.14328e+10	5.51359e+10	5.98776e+10
Andorra	Gross capital formation	5.85819e+08	6.212e+08	6.69273e+08	7.75465e+08	8.66037e+08	9.74951e+08	1.06315e+09	1.06532e+09	9.19706e+08	7.34245e+08	6.66226e+08	5.90052e+08	5.33931e+08	5.01239e+08
Angola	Gross capital formation	3.27585e+09	3.00821e+09	3.23112e+09	3.3636e+09	2.69092e+09	2.8738e+09	4.77546e+09	7.07618e+09	9.07929e+09	9.94972e+09	1.02882e+10	1.06893e+10	1.12445e+10	1.09268e+10
Anguilla	Gross capital formation	6.98694e+07	5.49913e+07	3.96333e+07	4.48492e+07	6.66638e+07	8.02259e+07	1.09641e+08	1.62234e+08	1.76823e+08	7.47013e+07	5.78805e+07	4.37765e+07	4.48801e+07	4.67555e+07
Antigua and Barbuda	Gross capital formation	2.58588e+08	1.73684e+08	1.89363e+08	2.11157e+08	2.26285e+08	2.75248e+08	4.17266e+08	4.70783e+08	4.71532e+08	4.18278e+08	2.87736e+08	2.07562e+08	2.27663e+08	2.56288e+08
Argentina	Gross capital formation	3.88448e+10	3.27613e+10	2.08206e+10	2.87671e+10	3.86702e+10	4.25253e+10	5.02056e+10	5.83746e+10	6.20166e+10	4.71494e+10	6.52734e+10	7.54268e+10	6.72354e+10	6.8839e+10
Armenia	Gross capital formation	5.37819e+08	6.25441e+08	7.66275e+08	1.00163e+09	1.17653e+09	1.49299e+09	1.97351e+09	2.36231e+09	2.6611e+09	1.83947e+09	1.84897e+09	1.75286e+09	1.76169e+09	1.5583e+09
Aruba	Gross capital formation	5.72381e+08	5.30025e+08	5.88857e+08	6.41855e+08	6.69454e+08	7.82592e+08	8.272e+08	8.49249e+08	8.64897e+08	8.81967e+08	7.36158e+08	6.55785e+08	6.65743e+08	5.96139e+08
Australia	Gross capital formation	1.37781e+11	1.49421e+11	1.66204e+11	1.85145e+11	1.98191e+11	2.1115e+11	2.25911e+11	2.49235e+11	2.47643e+11	2.537e+11	2.6813e+11	2.96324e+11	3.00857e+11	2.92512e+11
Austria	Gross capital formation	7.30944e+10	7.23652e+10	6.95666e+10	7.278e+10	7.39822e+10	7.51542e+10	7.67771e+10	8.23849e+10	8.18055e+10	7.33499e+10	7.32726e+10	8.01281e+10	7.97298e+10	7.6234e+10
Azerbaijan	Gross capital formation	1.42737e+09	1.72141e+09	2.75421e+09	4.44805e+09	5.19986e+09	5.50146e+09	6.2992e+09	6.67721e+09	8.05945e+09	6.93116e+09	7.06976e+09	7.14047e+09	7.42613e+09	7.76033e+09
Bahamas	Gross capital formation	1.86794e+09	1.70718e+09	1.62746e+09	1.64599e+09	1.5623e+09	1948095522	2.37635e+09	2.31384e+09	2.099e+09	1.90128e+09	1.91297e+09	2.05983e+09	2.1722e+09	2.13334e+09
Bahrain	Gross capital formation	2.5142e+09	2.50791e+09	2.49192e+09	2.96623e+09	3.37188e+09	4.32345e+09	5.35771e+09	6.93916e+09	8.24697e+09	5.82946e+09	6.93194e+09	4.46562e+09	5.4399e+09	4.93884e+09
Bangladesh	Gross capital formation	1.17042e+10	1.23796e+10	1.33901e+10	1.44434e+10	1.5767e+10	1.74546e+10	1.89013e+10	2.05018e+10	2.08718e+10	2.21628e+10	2.3921e+10	2.62105e+10	2.91475e+10	3.08473e+10
Barbados	Gross capital formation	6.37906e+08	6.29359e+08	6.1724e+08	6.61279e+08	7.06423e+08	722600000	7.70451e+08	7.7274e+08	7.72862e+08	6.05363e+08	5.49025e+08	6.03295e+08	5.79764e+08	5.64033e+08
Belarus	Gross capital formation	4.47119e+09	4.5558e+09	4.67415e+09	5.88256e+09	7.59031e+09	8.59793e+09	1.13762e+10	1.32406e+10	1.69597e+10	1.63505e+10	1.93527e+10	2.07896e+10	1.96511e+10	2.11428e+10
Belgium	Gross capital formation	8.31957e+10	8.06109e+10	7.70716e+10	7.75473e+10	8.50394e+10	9.16498e+10	9.57506e+10	1.0243e+11	1.05487e+11	9.41527e+10	9.54799e+10	1.01619e+11	9.86462e+10	9.43997e+10
Belize	Gross capital formation	2.85238e+08	2.38359e+08	2.39478e+08	2.13553e+08	2.11531e+08	2.33087e+08	2.16202e+08	2.21287e+08	2.96225e+08	2.21948e+08	1.41203e+08	1.96054e+08	1.86278e+08	2.24899e+08
Benin	Gross capital formation	6.61878e+08	7.7789e+08	7.48978e+08	8.6619e+08	9.42887e+08	7.91266e+08	1.0103e+09	1.05512e+09	1.08934e+09	1.13428e+09	1.08791e+09	1.14242e+09	1.26854e+09	1.79402e+09
Bermuda	Gross capital formation	8.59845e+08	8.34158e+08	7.17153e+08	6.68832e+08	9.44222e+08	1001874942	9.93325e+08	7.44174e+08	7.3637e+08	7.75105e+08	6.60175e+08	6.08489e+08	5.14638e+08	5.23907e+08
Bhutan	Gross capital formation	2.94741e+08	3.84394e+08	4.36477e+08	4.35623e+08	5.03399e+08	4.3739e+08	4.31382e+08	3.30533e+08	5.1008e+08	5.98972e+08	8.74959e+08	9.7855e+08	1.01373e+09	6.62887e+08
Bolivia	Gross capital formation	1.43527e+09	1.18454e+09	1.39611e+09	1.21702e+09	1.07286e+09	1.3611e+09	1.29181e+09	1.43464e+09	1.85519e+09	1.92714e+09	2.06488e+09	2.55048e+09	2.43502e+09	2.82359e+09
Bosnia and Herzegovina	Gross capital formation	2.15325e+09	2.13343e+09	2.46386e+09	2.58576e+09	2.8244e+09	3.0533e+09	2.63429e+09	3.79145e+09	4.35944e+09	3.10483e+09	2.61048e+09	3.02328e+09	3.11579e+09	3.14312e+09
Botswana	Gross capital formation	2.39358e+09	2.33606e+09	2.39966e+09	2.48472e+09	2.71054e+09	2.69636e+09	2.68439e+09	3.19208e+09	3.61008e+09	3.67813e+09	4.21431e+09	4.64837e+09	4.83576e+09	4.67732e+09
Brazil	Gross capital formation	1.54053e+11	1.50032e+11	1.33357e+11	1.31045e+11	1.46562e+11	1.42942e+11	1.57702e+11	1.83976e+11	2.12775e+11	1.78311e+11	2.16351e+11	2.26553e+11	2.1752e+11	2.28781e+11
British Virgin Islands	Gross capital formation	1.92231e+08	1.99309e+08	1.92112e+08	1.65862e+08	1.7136e+08	195000000	1.97513e+08	1.97623e+08	1.95751e+08	2.03111e+08	2.04726e+08	2.00656e+08	1.91236e+08	1.90198e+08
Brunei Darussalam	Gross capital formation	8.52332e+08	9.09112e+08	1.32487e+09	1.04854e+09	1.07828e+09	1.08341e+09	1.09866e+09	1.39029e+09	1.57344e+09	1.56839e+09	1.51306e+09	1.54442e+09	1.5906e+09	1.67899e+09
Bulgaria	Gross capital formation	4.00804e+09	4.67598e+09	4.96644e+09	5.7962e+09	6.65292e+09	8.22505e+09	9.92442e+09	1.12887e+10	1.31552e+10	9.95407e+09	8.13493e+09	7.84168e+09	8.04003e+09	7.85766e+09
Burkina Faso	Gross capital formation	8.01179e+08	8.53351e+08	8.57904e+08	1.01324e+09	1.113e+09	1.31628e+09	1.31673e+09	1.4204e+09	1.60388e+09	1.8014e+09	2.12818e+09	2.61217e+09	2.72057e+09	2.91374e+09
Burundi	Gross capital formation	8.67279e+07	1.00925e+08	1.05951e+08	1.94431e+08	2.50253e+08	2.04331e+08	2.20281e+08	2.1032e+08	2.07368e+08	2.94721e+08	3.78971e+08	3.98033e+08	4.99479e+08	6.36836e+08
Cabo Verde	Gross capital formation	2.72442e+08	3.04971e+08	3.61246e+08	3.65298e+08	4.56176e+08	4.2214e+08	4.90654e+08	6.89522e+08	7.15933e+08	6.51156e+08	7.17498e+08	7.29839e+08	5.61479e+08	5.67473e+08
Cambodia	Gross capital formation	6.55673e+08	7.79917e+08	7.98189e+08	9.71213e+08	8.94316e+08	1.16205e+09	1.45071e+09	1.64984e+09	1.91405e+09	1.98751e+09	1.83023e+09	2.00923e+09	2.33738e+09	2.50135e+09
Cameroon	Gross capital formation	2.34569e+09	2.93728e+09	2.85884e+09	2.8942e+09	3.14506e+09	3.16294e+09	3.242e+09	3.42635e+09	3.71897e+09	3.93846e+09	4.15887e+09	4.62797e+09	4.71545e+09	4.95366e+09
Canada	Gross capital formation	2.05587e+11	1.98014e+11	2.01372e+11	2.19134e+11	2.37814e+11	2.65638e+11	2.81679e+11	2.90361e+11	2.93855e+11	2.5102e+11	2.8396e+11	3.08107e+11	3.19996e+11	3.22451e+11
Cayman Islands	Gross capital formation	6.07599e+08	6.11972e+08	6.22787e+08	6.34842e+08	6.40277e+08	6.82013e+08	7.13564e+08	7.36106e+08	7.33385e+08	6.80563e+08	6.62119e+08	6.67884e+08	6.77129e+08	6.86504e+08
Central African Republic	Gross capital formation	1.85293e+08	1.7244e+08	1.61088e+08	9.96628e+07	1.08911e+08	1.59896e+08	1.63639e+08	1.71399e+08	1.79107e+08	1.67645e+08	2.02196e+08	2.00922e+08	2.14404e+08	7.57016e+07
Chad	Gross capital formation	3.11941e+08	9.68846e+08	1.60255e+09	1.49342e+09	1.3267e+09	1.47549e+09	1.12099e+09	1.10558e+09	1.08171e+09	1.19637e+09	1.4811e+09	1.51072e+09	1.76604e+09	1.955e+09
Chile	Gross capital formation	1.82825e+10	1.84334e+10	1.8837e+10	2.03112e+10	2.20292e+10	2.70621e+10	2.95217e+10	3.14103e+10	3.79347e+10	2.90283e+10	3.69549e+10	4.21916e+10	4.68205e+10	4.56284e+10
China	Gross capital formation	5.19225e+11	5.79151e+11	6.48388e+11	7.56701e+11	8.5932e+11	9.50132e+11	1.07764e+12	1.23416e+12	1.3685e+12	1.63109e+12	1.82665e+12	2.00073e+12	2.15536e+12	2.34465e+12
China: Hong Kong SAR	Gross capital formation	3.76824e+10	3.67091e+10	3.63985e+10	3.72843e+10	3.82286e+10	3.82382e+10	4.14211e+10	4.4574e+10	4.45186e+10	4.48303e+10	4.99073e+10	5.14685e+10	5.31743e+10	5.51467e+10
China: Macao SAR	Gross capital formation	8.71064e+08	8.31334e+08	9.44268e+08	1.3977e+09	1.95535e+09	3.11981e+09	4.43888e+09	5.45442e+09	4.68731e+09	3.11254e+09	2.73436e+09	3.37353e+09	3.93623e+09	4.14915e+09
Colombia	Gross capital formation	1.77897e+10	1.92883e+10	2.12307e+10	2.36415e+10	2.62854e+10	2.96372e+10	3.53239e+10	3.99236e+10	4.35843e+10	4.17893e+10	4.48808e+10	5.33498e+10	5.57287e+10	5.84648e+10
Comoros	Gross capital formation	3.40649e+07	3.50601e+07	3.99919e+07	3.83569e+07	3.47491e+07	3.60287e+07	3.6122e+07	4.07916e+07	6.39205e+07	7.01847e+07	5.87446e+07	6.22693e+07	6.66281e+07	7.12921e+07
Congo	Gross capital formation	1.01096e+09	1.05032e+09	9.61091e+08	9.96784e+08	1.11226e+09	1.49353e+09	1.95202e+09	2.35823e+09	2.4677e+09	2.69431e+09	3.44944e+09	3.90781e+09	4.99826e+09	5.4158e+09
Cook Islands	Gross capital formation	2.22586e+07	2.08169e+07	2.27459e+07	2.61274e+07	2.79579e+07	2.38616e+07	2.75064e+07	2.55679e+07	2.83034e+07	2.13469e+07	2.19542e+07	2.37025e+07	2.32425e+07	2.44699e+07
Costa Rica	Gross capital formation	2.85985e+09	3.76211e+09	4.12943e+09	3.93667e+09	4.3676e+09	4.86075e+09	5.53789e+09	5.46973e+09	6.57473e+09	4.29235e+09	5.72436e+09	6.45789e+09	6.85848e+09	7.22764e+09
Côte d'Ivoire	Gross capital formation	2.48351e+09	1.96744e+09	2.03533e+09	1.83988e+09	2.101e+09	1.93534e+09	1.89622e+09	1.85882e+09	2.11517e+09	2.43071e+09	2.48904e+09	2.1879e+09	3.84809e+09	6.12025e+09
Croatia	Gross capital formation	7.1261e+09	8.10845e+09	9.92052e+09	1.14386e+10	1.19113e+10	1.26886e+10	1.42443e+10	1.50738e+10	1.65653e+10	1.25994e+10	1.07967e+10	1.06386e+10	9.95226e+09	9.79871e+09
Cuba	Gross capital formation	3.74672e+09	3.77637e+09	3.36959e+09	3.04482e+09	3.45527e+09	4594500000	5.78867e+09	5.92621e+09	7.22609e+09	5.84995e+09	5.80739e+09	6.22143e+09	6.30076e+09	6.45548e+09
Curaçao	Gross capital formation	6.43313e+08	8.21018e+08	7.82492e+08	7.6625e+08	7.55113e+08	8.19086e+08	8.29202e+08	8.8269e+08	1.03634e+09	9.83641e+08	1.1257e+09	1.0985e+09	1.12988e+09	1.16562e+09
Cyprus	Gross capital formation	3.29357e+09	3.20409e+09	3.76325e+09	3.62101e+09	3.98363e+09	4.16894e+09	4.70663e+09	4.93279e+09	5.57153e+09	4.5163e+09	4.91798e+09	4.18842e+09	3.53587e+09	2.47496e+09
Czech Republic	Gross capital formation	3.24483e+10	3.45415e+10	3.51569e+10	3.51252e+10	3.7708e+10	3.96666e+10	4.36761e+10	4.99633e+10	5.05541e+10	4.1415e+10	4.32476e+10	4.4053e+10	4.24068e+10	4.02389e+10
Czechoslovakia (Former)	Gross capital formation
D.R. of the Congo	Gross capital formation	7.86018e+08	8.41725e+08	1.24201e+09	1.28844e+09	1.2091e+09	1.40935e+09	1.67205e+09	1.87695e+09	1.9968e+09	3.31393e+09	4.00457e+09	4.48737e+09	4.92079e+09	5.31441e+09
Denmark	Gross capital formation	5.39829e+10	5.31875e+10	5.33561e+10	5.21486e+10	5.60144e+10	5.86454e+10	6.67755e+10	6.82877e+10	6.47721e+10	5.02685e+10	5.12919e+10	5.40627e+10	5.26568e+10	5.31968e+10
Djibouti	Gross capital formation	3.90851e+07	3.53058e+07	4.618e+07	8.94506e+07	1.03584e+08	1.17257e+08	1.99688e+08	2.52206e+08	2.93568e+08	2.48946e+08	1.83473e+08	2.191e+08	2.68453e+08	2.94657e+08
Dominica	Gross capital formation	6.09767e+07	4.9936e+07	2.37945e+07	3.23246e+07	7.01899e+07	7.31852e+07	7.73682e+07	8.31217e+07	9.65241e+07	8.77068e+07	9.64635e+07	9.74827e+07	9.29837e+07	5.32722e+07
Dominican Republic	Gross capital formation	6.97492e+09	6.7027e+09	6.93513e+09	4.99492e+09	4.87972e+09	5.51931e+09	6.6646e+09	7.49387e+09	8.18173e+09	6.9802e+09	8.2039e+09	7.99072e+09	8.33411e+09	8.1017e+09
Ecuador	Gross capital formation	5.1636e+09	6.9027e+09	8.13664e+09	7.27539e+09	7.76081e+09	8980900000	9.67889e+09	1.00893e+10	1.23576e+10	1.14543e+10	1.26524e+10	1.41112e+10	1.46396e+10	1.63493e+10
Egypt	Gross capital formation	1.47721e+10	1.41783e+10	1.48908e+10	1.42452e+10	1.50629e+10	1.66135e+10	1.88287e+10	2.33033e+10	2.68967e+10	2.44516e+10	2.64017e+10	2.58467e+10	2.79018e+10	2.52208e+10
El Salvador	Gross capital formation	2.50493e+09	2.63176e+09	2.56145e+09	2.76213e+09	2.65313e+09	2749098733	3.06873e+09	3.15546e+09	2.98365e+09	2.40998e+09	2.46754e+09	2.80781e+09	2.76789e+09	3.03613e+09
Equatorial Guinea	Gross capital formation	8.8281e+08	1.40111e+09	1.13988e+09	1.41395e+09	1.42133e+09	1.56327e+09	1.66297e+09	1.9601e+09	2.40461e+09	3.00528e+09	2.91212e+09	2.71701e+09	3.00229e+09	3.07173e+09
Eritrea	Gross capital formation	2.19556e+08	3.81975e+08	3.175e+08	3.06868e+08	2.52025e+08	2.23413e+08	1.33966e+08	1.17744e+08	1.11089e+08	9.66182e+07	1.03821e+08	1.18923e+08	1.21356e+08	1.18623e+08
Estonia	Gross capital formation	2.33278e+09	2.61608e+09	3.24023e+09	3.8161e+09	4.02627e+09	4.64331e+09	5.70352e+09	6.29161e+09	5.46741e+09	3.46109e+09	3.37033e+09	4.48153e+09	4.94898e+09	5.07025e+09
Ethiopia	Gross capital formation	2.08767e+09	2.29893e+09	2.29491e+09	2.09111e+09	3.06089e+09	3.16266e+09	3.83315e+09	3.98568e+09	4.34876e+09	5.66171e+09	6.6572e+09	8.21822e+09	1.16301e+10	1.28929e+10
Ethiopia (Former)	Gross capital formation
Fiji	Gross capital formation	6.06023e+08	5.78191e+08	5.80895e+08	5.64458e+08	5.37066e+08	6.36914e+08	6.37425e+08	5.3314e+08	6.65305e+08	5.35189e+08	4.75731e+08	6.22422e+08	5.59085e+08	5.87182e+08
Finland	Gross capital formation	4.40266e+10	4.39464e+10	4.3051e+10	4.41801e+10	4.6633e+10	5.03855e+10	5.02584e+10	5.53233e+10	5.43304e+10	4.31712e+10	4.63535e+10	5.15352e+10	4.79865e+10	4.56618e+10
France	Gross capital formation	4.53784e+11	4.57158e+11	4.48186e+11	4.49756e+11	4.79455e+11	4.93076e+11	5.11996e+11	5.43327e+11	5.42532e+11	4.69299e+11	4.85079e+11	5.18957e+11	5.06725e+11	4.9782e+11
French Polynesia	Gross capital formation	1.09992e+09	1.17108e+09	1.39216e+09	1.34953e+09	1.43071e+09	1.41746e+09	1.2592e+09	1.34852e+09	1.41322e+09	1.16316e+09	1.25413e+09	1.26041e+09	1.23493e+09	1.2511e+09
Gabon	Gross capital formation	1.86109e+09	2.06079e+09	2.46924e+09	2.08752e+09	1.97643e+09	2.0465e+09	2.22268e+09	2.49199e+09	2.67117e+09	2.49026e+09	2.64916e+09	2.94766e+09	3.37799e+09	3.88118e+09
Gambia	Gross capital formation	1.02478e+08	1.49164e+08	1.25248e+08	2.73982e+08	2.10984e+08	1.83878e+08	1.99381e+08	1.99932e+08	1.86902e+08	2.01896e+08	1.418e+08	1.89272e+08	1.82765e+08	1.78585e+08
Georgia	Gross capital formation	1.19649e+09	1.43072e+09	1.41814e+09	1.73077e+09	1.86655e+09	2.14685e+09	2.16394e+09	2.52528e+09	2.09229e+09	1.01026e+09	1.77884e+09	2.31026e+09	2.71486e+09	2.39991e+09
Germany	Gross capital formation	6.27103e+11	6.05436e+11	5.54198e+11	5.57594e+11	5.41666e+11	5.35927e+11	5.82716e+11	6.25463e+11	6.29973e+11	5.21698e+11	5.85585e+11	6.28977e+11	5.8336e+11	5.84473e+11
Ghana	Gross capital formation	3.19274e+09	3.13068e+09	1.88069e+09	2.68556e+09	3.40896e+09	3.548e+09	3.94869e+09	4.67318e+09	6.07831e+09	5.00093e+09	6.19189e+09	8.97123e+09	1.06582e+10	1.06218e+10
Greece	Gross capital formation	4.96903e+10	5.05244e+10	5.06691e+10	6.08389e+10	6.08366e+10	5.16888e+10	6.57564e+10	7.28921e+10	6.77741e+10	4.89806e+10	4.36039e+10	3.64341e+10	2.88517e+10	2.5297e+10
Greenland	Gross capital formation	3.71463e+08	3.57896e+08	3.03466e+08	3.01489e+08	2.79811e+08	3.96538e+08	3.94203e+08	5.15432e+08	7.52554e+08	5.74129e+08	1.00568e+09	1.28096e+09	7.39598e+08	5.15099e+08
Grenada	Gross capital formation	2.11106e+08	1.65518e+08	1.56122e+08	2.11979e+08	2.1576e+08	3.21885e+08	2.37811e+08	2.50888e+08	2.22107e+08	1.59796e+08	1.46274e+08	1.33316e+08	1.07225e+08	1.23869e+08
Guatemala	Gross capital formation	4.58434e+09	4.87623e+09	5.29482e+09	5.24554e+09	5.42667e+09	5.37037e+09	5.97747e+09	6.42633e+09	5.22683e+09	4.29673e+09	4.61118e+09	5.39238e+09	5.48834e+09	5.42248e+09
Guinea	Gross capital formation	4.33187e+08	4.16293e+08	5.38683e+08	5.90935e+08	7.02622e+08	8.26873e+08	8.80088e+08	1.02181e+09	1.22043e+09	1.05228e+09	1.17e+09	1.42842e+09	1.48984e+09	1.51964e+09
Guinea-Bissau	Gross capital formation	4.95266e+07	1.73196e+07	4.25257e+07	5.01319e+07	3.95967e+07	3.76667e+07	3.77691e+07	5.39483e+07	4.37676e+07	4.68028e+07	5.34421e+07	5.79124e+07	5.00385e+07	2.86152e+07
Guyana	Gross capital formation	3.06642e+08	3.13569e+08	3.12988e+08	2.85369e+08	2.69512e+08	2.66716e+08	3.92276e+08	3.64989e+08	3.61407e+08	4.1536e+08	4.13373e+08	4.09707e+08	4.48073e+08	3.52094e+08
Haiti	Gross capital formation	5.31667e+08	5.25044e+08	5.38412e+08	5.55092e+08	5.37309e+08	5.45035e+08	5.56932e+08	5.73979e+08	5.90046e+08	6.11018e+08	5.71159e+08	6.25858e+08	6.64369e+08	7.04597e+08
Honduras	Gross capital formation	2.32492e+09	2.23422e+09	2.15275e+09	2.23602e+09	2.72647e+09	2.69509e+09	2.88954e+09	3.60213e+09	3.92282e+09	2.1873e+09	2.44995e+09	3.04097e+09	3.14376e+09	2.8557e+09
Hungary	Gross capital formation	2.54135e+10	2.42808e+10	2.52287e+10	2.5471e+10	2.91118e+10	2.83907e+10	2.91272e+10	2.90427e+10	2.91688e+10	2.22142e+10	2.34128e+10	2.27134e+10	2.09777e+10	2.15484e+10
Iceland	Gross capital formation	3.20269e+09	3.10186e+09	2.7069e+09	2.96944e+09	3.75612e+09	4.95258e+09	6.10575e+09	5.41977e+09	4.39504e+09	2.2993e+09	2.10269e+09	2.34738e+09	2.44868e+09	2.39384e+09
India	Gross capital formation	1.53193e+11	1.58583e+11	1.75202e+11	1.99954e+11	2.4686e+11	2.87092e+11	3.30972e+11	3.87907e+11	3.81521e+11	4.2981e+11	4.99309e+11	5.24863e+11	5.37215e+11	5.23695e+11
Indonesia	Gross capital formation	5.19123e+10	5.63579e+10	5.38443e+10	5.96806e+10	6.38006e+10	7.16999e+10	7.26632e+10	7.40691e+10	8.32831e+10	8.53027e+10	9.28122e+10	1.02181e+11	1.18875e+11	1.24646e+11
Iran (Islamic Republic of)	Gross capital formation	5.04232e+10	5.35162e+10	5.54463e+10	6.45533e+10	6.48924e+10	6.21049e+10	6.56679e+10	7.9271e+10	9.08301e+10	9.75056e+10	1.08572e+11	1.00188e+11	8.78593e+10	7.79014e+10
Iraq	Gross capital formation	1.27898e+10	1.903e+10	7.38103e+09	3.45344e+09	8.22032e+09	1.10676e+10	8.97909e+09	4.48713e+09	7.92841e+09	6.09172e+09	9.04759e+09	9.71841e+09	1.06479e+10	1.13442e+10
Ireland	Gross capital formation	4.30864e+10	4.37652e+10	4.65274e+10	5.00341e+10	5.33207e+10	6.18403e+10	6.61129e+10	6.63087e+10	5.74548e+10	4.39467e+10	3.69261e+10	3.77706e+10	3.88838e+10	3.87766e+10
Israel	Gross capital formation	2.89852e+10	2.80333e+10	2.49883e+10	2.37759e+10	2.42924e+10	2.75053e+10	2.92744e+10	3.19461e+10	3.40304e+10	3.13057e+10	3.48262e+10	4.01569e+10	4.26748e+10	4.30231e+10
Italy	Gross capital formation	3.57732e+11	3.66078e+11	3.82198e+11	3.83578e+11	3.91653e+11	3.90967e+11	4.11751e+11	4.22071e+11	4.07619e+11	3.45224e+11	3.64085e+11	3.60393e+11	3.19517e+11	3.02484e+11
Jamaica	Gross capital formation	2.44043e+09	2.72631e+09	2.89927e+09	2.8857e+09	2.94789e+09	3.02477e+09	3.28693e+09	3.11352e+09	2.86749e+09	2.33789e+09	2.29044e+09	2.49159e+09	2.34665e+09	2.486e+09
Japan	Gross capital formation	1.0776e+12	1.05982e+12	9.88063e+11	1.00475e+12	1.03036e+12	1.02713e+12	1.03706e+12	1.05513e+12	1.02361e+12	8.44608e+11	8.82543e+11	8.83823e+11	9.18757e+11	9.29327e+11
Jordan	Gross capital formation	2.30523e+09	2.27052e+09	2.27509e+09	2.36488e+09	3.24129e+09	4.29894e+09	3.88845e+09	4.46877e+09	5.2101e+09	4.99231e+09	4.32641e+09	4.43689e+09	4.91315e+09	4.80678e+09
Kazakhstan	Gross capital formation	6.86269e+09	9.64019e+09	1.06965e+10	1.13817e+10	1.31038e+10	1.76911e+10	2.2326e+10	2.79604e+10	2.39651e+10	2.42112e+10	2.47138e+10	2.60528e+10	2.90018e+10	3.18261e+10
Kenya	Gross capital formation	3.15463e+09	3.53702e+09	2.8184e+09	3.09817e+09	3.33484e+09	3.776e+09	4.62378e+09	5.00101e+09	5.70796e+09	6.34114e+09	7.06225e+09	7.52601e+09	8.25787e+09	8.16178e+09
Kiribati	Gross capital formation	4.68073e+07	4.52464e+07	4.85043e+07	4.68414e+07	4.6922e+07	5.58609e+07	4.87298e+07	4.89352e+07	4.95705e+07	4.97401e+07	4.69703e+07	4.87796e+07	5.51185e+07	5.28849e+07
Kosovo	Gross capital formation	9.9104e+08	1.15339e+09	1.01133e+09	8.86186e+08	8.65892e+08	8.98125e+08	9.36676e+08	9.7481e+08	1.12379e+09	1.24419e+09	1.39746e+09	1.55605e+09	1.37315e+09	1.54039e+09
Kuwait	Gross capital formation	4.94739e+09	5.88154e+09	7.52933e+09	8.81229e+09	1.13902e+10	1.32705e+10	1.55518e+10	2.15697e+10	2.18864e+10	1.77529e+10	1.811e+10	1.87271e+10	1.93356e+10	2.35158e+10
Kyrgyzstan	Gross capital formation	4.40597e+08	4.15926e+08	3.89107e+08	2.8747e+08	3.55307e+08	4.03927e+08	6.19119e+08	7.09646e+08	8.08286e+08	7.68738e+08	7.29068e+08	7.7523e+08	1.10411e+09	1.14941e+09
Lao People's DR	Gross capital formation	5.27164e+08	5.65456e+08	7.4524e+08	7.84686e+08	9.60785e+08	9.87511e+08	1.2579e+09	1.70498e+09	1.73282e+09	1.7558e+09	1.53039e+09	1.79837e+09	2.34355e+09	2.18383e+09
Latvia	Gross capital formation	2.57987e+09	3.29939e+09	3.50063e+09	4.40901e+09	5.46358e+09	5.94534e+09	7.14642e+09	8.48818e+09	7.25518e+09	4.26567e+09	3.57326e+09	5.07768e+09	5.20782e+09	5.05231e+09
Lebanon	Gross capital formation	3.59105e+09	4.25754e+09	3.76386e+09	4.00107e+09	4.83901e+09	4.98308e+09	4.08306e+09	5.42231e+09	6.82688e+09	8.10838e+09	8.5161e+09	8.42452e+09	8.12646e+09	9.14431e+09
Lesotho	Gross capital formation	4.9394e+08	4.66779e+08	3.83876e+08	3.66296e+08	3.49258e+08	3.00739e+08	3.02195e+08	3.80863e+08	4.84817e+08	4.51536e+08	5.33284e+08	4.28822e+08	5.21655e+08	5.28974e+08
Liberia	Gross capital formation	40580788	23426399	77759248	30416411	34999943	80864000	168371553	206595294	302032158	185712785	289691128	292452726	319246682	348420150
Libya	Gross capital formation	9.35889e+09	9.0305e+09	1.05712e+10	9.76086e+09	1.07514e+10	1.26437e+10	1.27701e+10	1.36385e+10	1.41295e+10	1.38752e+10	1.45134e+10	5.63149e+09	1.14915e+10	9.63582e+09
Liechtenstein	Gross capital formation	8.652e+08	8.60988e+08	8.42462e+08	8.32021e+08	7.87427e+08	8.79063e+08	9.99701e+08	1.01478e+09	1.03504e+09	9.88715e+08	9.80628e+08	1.03548e+09	9.31839e+08	8.54727e+08
Lithuania	Gross capital formation	3.03941e+09	3.55502e+09	4.17845e+09	4.82694e+09	6.08006e+09	6.33063e+09	7.13189e+09	9.26834e+09	9.59644e+09	4.40474e+09	6.08666e+09	7.06603e+09	6.20544e+09	6.17272e+09
Luxembourg	Gross capital formation	7.19768e+09	7.07556e+09	6.17843e+09	6.868e+09	7.32702e+09	7.58469e+09	7.45871e+09	8.41106e+09	8.67109e+09	6.79774e+09	8.17005e+09	9.64545e+09	9.0969e+09	8.65828e+09
Madagascar	Gross capital formation	7.76355e+08	9.52371e+08	5.95076e+08	8.85912e+08	1.13332e+09	1.11847e+09	1.33474e+09	1.61242e+09	2.46444e+09	1.99909e+09	1.75376e+09	1.77577e+09	1.87909e+09	2.00875e+09
Malawi	Gross capital formation	1.83655e+08	1.85135e+08	1.56629e+08	1.66817e+08	5.10269e+08	7.08435e+08	1.00503e+09	1.59281e+09	3.09346e+09	1.43438e+09	1.88017e+09	1.12612e+09	1.37216e+09	1.63436e+09
Malaysia	Gross capital formation	3.20029e+10	2.90203e+10	3.13154e+10	3.08421e+10	3.29577e+10	3.21466e+10	3.49041e+10	3.80664e+10	3.87424e+10	3.50934e+10	4.39719e+10	4.49963e+10	5.50174e+10	5.89545e+10
Maldives	Gross capital formation	1.52603e+08	1.65645e+08	1.63117e+08	2.25817e+08	2.99697e+08	3.75947e+08	4.17326e+08	5.11427e+08	5.97806e+08	3.77992e+08	3.97022e+08	4.94549e+08	3.90571e+08	2.78355e+08
Mali	Gross capital formation	5.46584e+08	1.03528e+09	8.11324e+08	1.26306e+09	8.5069e+08	1.2078e+09	1.3284e+09	1.4026e+09	1.51358e+09	1.61233e+09	1.86568e+09	1.8182e+09	1.65048e+09	1.35056e+09
Malta	Gross capital formation	1.40117e+09	9.88539e+08	8.60005e+08	1.10633e+09	1.12239e+09	1.36459e+09	1.40085e+09	1.42006e+09	1.50875e+09	1.38619e+09	1.69157e+09	1.45654e+09	1.24354e+09	1.3482e+09
Marshall Islands	Gross capital formation	6.53168e+07	6.78583e+07	7.03656e+07	7.26335e+07	7.75562e+07	79147451	7.98413e+07	8.08557e+07	8.20408e+07	8.0555e+07	8.52756e+07	8.57821e+07	8.85272e+07	8.92567e+07
Mauritania	Gross capital formation	3.11376e+08	3.71263e+08	2.37059e+08	4.64773e+08	8.99292e+08	1.34275e+09	9.99909e+08	1.1039e+09	1.2643e+09	1.1056e+09	1.49982e+09	1.95024e+09	2.77715e+09	2.83825e+09
Mauritius	Gross capital formation	1.69258e+09	1.24596e+09	1.59381e+09	1.64932e+09	1.8699e+09	1.47087e+09	1.8438e+09	2.07265e+09	2.08856e+09	1.77052e+09	1.74028e+09	1.95182e+09	1.94412e+09	2.15741e+09
Mexico	Gross capital formation	1.89086e+11	1.81956e+11	1.7987e+11	1.72435e+11	1.87192e+11	1.93196e+11	2.14587e+11	2.22538e+11	2.36298e+11	2.048e+11	2.1406e+11	2.25636e+11	2.38514e+11	2.32995e+11
Micronesia (FS of)	Gross capital formation	7.8209e+07	8.09033e+07	7.94397e+07	8.23916e+07	8.25705e+07	82713108	8.26373e+07	7.82901e+07	8.03387e+07	8.24346e+07	8.18576e+07	8.3183e+07	8.06578e+07	8.43287e+07
Monaco	Gross capital formation	8.66753e+08	8.7131e+08	8.47404e+08	8.49071e+08	9.01889e+08	9.40443e+08	1.03069e+09	1.22689e+09	1.23269e+09	9.60914e+08	1.00981e+09	1.14095e+09	1.12659e+09	1.1935e+09
Mongolia	Gross capital formation	8.3136e+08	7.0499e+08	6.60786e+08	8.18919e+08	8.361e+08	9.47026e+08	1.08884e+09	1.28746e+09	1.5211e+09	1.0675e+09	1.45584e+09	2.47284e+09	3.2217e+09	3.28834e+09
Montenegro	Gross capital formation	2.05215e+08	1.94844e+08	3.08836e+08	2.84246e+08	3.0405e+08	4.00108e+08	4.79582e+08	8.73816e+08	1.14005e+09	7.58169e+08	6.57652e+08	5.36842e+08	5.54197e+08	5.70043e+08
Montserrat	Gross capital formation	1.96195e+07	1.79839e+07	2.09041e+07	2.4974e+07	1.94704e+07	1.57519e+07	1.13208e+07	1.15352e+07	1.27763e+07	1.40281e+07	1.31871e+07	1.65904e+07	1.79035e+07	2.14595e+07
Morocco	Gross capital formation	1.154e+10	1.26442e+10	1.33464e+10	1.58292e+10	1.73825e+10	1.7141e+10	1.86254e+10	2.10605e+10	2.37607e+10	2.4792e+10	2.44001e+10	2.52087e+10	2.50271e+10	2.50128e+10
Mozambique	Gross capital formation	1.38409e+09	1.04711e+09	1.44718e+09	1.23986e+09	1.30452e+09	1.29999e+09	1.56755e+09	1.7026e+09	1.84571e+09	2.41414e+09	2.33142e+09	2.93477e+09	3.28511e+09	3.25866e+09
Myanmar	Gross capital formation	6.82313e+08	7.01563e+08	7.72247e+08	9.6349e+08	1.21286e+09	1.57384e+09	1.9111e+09	2.45038e+09	2.86358e+09	3.85815e+09	5.19143e+09	6.9108e+09	7.7051e+09	8.30976e+09
Namibia	Gross capital formation	9.94545e+08	1.36624e+09	1.23646e+09	1.24124e+09	1.342e+09	1.42973e+09	1.79403e+09	2.03587e+09	2.54726e+09	2.18601e+09	2.40551e+09	3.34643e+09	3.14947e+09	3.47076e+09
Nauru	Gross capital formation	1.59122e+07	1.50583e+07	1.44904e+07	1.34667e+07	1.31329e+07	1.13211e+07	9.26516e+06	1.05471e+07	1.82843e+07	1.46997e+07	1.79073e+07	2.03747e+07	2.35155e+07	3.05928e+07
Nepal	Gross capital formation	1.78162e+09	1.85646e+09	1.59599e+09	1.6993e+09	1.99568e+09	2.18457e+09	2.28146e+09	2.39615e+09	3.10577e+09	3.37243e+09	4.53383e+09	4.54577e+09	4.5682e+09	5.48872e+09
Netherlands	Gross capital formation	1.43502e+11	1.4616e+11	1.36522e+11	1.3477e+11	1.35815e+11	1.39801e+11	1.50386e+11	1.60268e+11	1.65898e+11	1.47623e+11	1.46539e+11	1.51611e+11	1.43224e+11	1.35668e+11
Netherlands Antilles (former)	Gross capital formation	8.415e+08	1.14135e+09	9.36522e+08	9.41554e+08	8.69127e+08	9.78281e+08	1.08136e+09	1.18221e+09	1.33467e+09	1.22602e+09	1.25048e+09	1.26927e+09	1.25193e+09
New Caledonia	Gross capital formation	1.21296e+09	1.23612e+09	1.35429e+09	1.70496e+09	1.60134e+09	1.86129e+09	2.23278e+09	2.58167e+09	2.85477e+09	2.4077e+09	3.09654e+09	3.00642e+09	2.96334e+09	3.17283e+09
New Zealand	Gross capital formation	1.94355e+10	2.10576e+10	2.25473e+10	2.57108e+10	2.80297e+10	2.91634e+10	2.75247e+10	3.06747e+10	2.80017e+10	2.44739e+10	2.59726e+10	2.75463e+10	2.89106e+10	3.23377e+10
Nicaragua	Gross capital formation	1.57667e+09	1.44436e+09	1.34188e+09	1.32801e+09	1.46991e+09	1.63629e+09	1.63397e+09	1.96964e+09	2.11431e+09	1.49996e+09	1.40026e+09	1.70233e+09	1.79666e+09	1.64767e+09
Niger	Gross capital formation	4.2577e+08	5.31522e+08	5.97378e+08	5.51879e+08	5.32939e+08	7.78003e+08	8.1824e+08	8.18457e+08	1.25696e+09	1.33463e+09	1.60242e+09	1.57369e+09	1.56426e+09	1.60514e+09
Nigeria	Gross capital formation	1.52715e+10	1.19212e+10	1.4342e+10	2.15227e+10	1.63609e+10	1.46552e+10	2.76209e+10	3.30817e+10	3.28436e+10	4.42553e+10	5.23925e+10	3.69109e+10	3.78373e+10	4.16733e+10
Norway	Gross capital formation	5.83132e+10	5.54918e+10	5.52852e+10	5.41824e+10	6.3024e+10	6.97503e+10	7.83202e+10	8.66889e+10	8.71662e+10	7.57605e+10	7.75983e+10	8.1317e+10	8.54799e+10	9.18331e+10
Oman	Gross capital formation	7.3671e+09	8.51404e+09	9.54392e+09	1.03228e+10	1.41521e+10	6.65969e+09	1.73154e+10	2.40103e+10	3.03283e+10	2.42832e+10	2.51694e+10	2.12091e+10	2.99283e+10	3.39183e+10
Pakistan	Gross capital formation	1.65616e+10	1.72709e+10	1.72279e+10	1.83208e+10	1.73739e+10	1.96113e+10	2.32154e+10	2.38863e+10	2.49919e+10	2.41497e+10	2.30704e+10	2.1819e+10	2.21969e+10	2.24913e+10
Palau	Gross capital formation	4.29925e+07	8.8614e+07	7.30615e+07	7.04544e+07	6.55742e+07	72554544	7.48258e+07	6.8629e+07	6.4411e+07	5.92749e+07	3.06785e+07	3.99501e+07	4.55878e+07	4.01308e+07
Panama	Gross capital formation	2.94365e+09	2.23184e+09	2.11067e+09	2.51254e+09	2.76043e+09	2839000000	3.22338e+09	4.47748e+09	5.55965e+09	5.24048e+09	5.82569e+09	6.96872e+09	8.086e+09	9.1112e+09
Papua New Guinea	Gross capital formation	8.41443e+08	9.0019e+08	1.05807e+09	9.37947e+08	9.43637e+08	8.50755e+08	8.34695e+08	8.94389e+08	9.53548e+08	1.3933e+09	1.83305e+09	2.27281e+09	2.49268e+09	2.49268e+09
Paraguay	Gross capital formation	1.28076e+09	1.42177e+09	1.50542e+09	1.66052e+09	1.69203e+09	1.48637e+09	1.60858e+09	1.68588e+09	2.03263e+09	1.77756e+09	2.18155e+09	2.41706e+09	2.23464e+09	2.5533e+09
Peru	Gross capital formation	1.21496e+10	1.13103e+10	1.17578e+10	1.23543e+10	1.23788e+10	1.31496e+10	1.77034e+10	2.27726e+10	2.98284e+10	2.37447e+10	3.24841e+10	3.57783e+10	3.99596e+10	4.42635e+10
Philippines	Gross capital formation	1.51533e+10	1.87863e+10	2.17288e+10	2.16315e+10	2.11479e+10	2.17734e+10	1.84808e+10	1.83935e+10	2.26901e+10	2.07207e+10	2.72714e+10	2.78039e+10	2.69197e+10	3.49743e+10
Poland	Gross capital formation	6.03354e+10	5.2251e+10	4.8493e+10	5.08577e+10	5.88222e+10	5.97543e+10	6.97988e+10	8.63402e+10	8.82523e+10	7.70013e+10	8.44835e+10	9.47797e+10	9.07424e+10	8.73725e+10
Portugal	Gross capital formation	5.11255e+10	5.19533e+10	4.91618e+10	4.51279e+10	4.69828e+10	4.66756e+10	4.6668e+10	4.78617e+10	4.8237e+10	4.233e+10	4.37662e+10	3.76388e+10	3.23066e+10	3.02125e+10
Puerto Rico	Gross capital formation	1.27525e+10	1.18534e+10	1.1847e+10	1.27588e+10	1.22568e+10	12211200000	1.17237e+10	1.07994e+10	9.45026e+09	8.71523e+09	9.4224e+09	1.02074e+10	9.20462e+09	9.4825e+09
Qatar	Gross capital formation	4.99423e+09	7.36964e+09	7.37678e+09	1.28198e+10	1.3035e+10	1.52773e+10	2.70355e+10	3.65637e+10	4.18835e+10	4.08848e+10	3.97194e+10	5.06808e+10	5.4455e+10	5.53362e+10
Republic of Korea	Gross capital formation	2.37744e+11	2.40609e+11	2.58168e+11	2.71619e+11	2.82051e+11	2.88868e+11	3.0331e+11	3.17055e+11	3.13989e+11	2.8214e+11	3.32479e+11	3.44045e+11	3.36132e+11	3.36075e+11
Republic of Moldova	Gross capital formation	5.84977e+08	6.15403e+08	6.21878e+08	7.06063e+08	7.79921e+08	9.21174e+08	1.03361e+09	1.2611e+09	1.34716e+09	8.24275e+08	9.73573e+08	1.10084e+09	1.0702e+09	1.19417e+09
Romania	Gross capital formation	1.64376e+10	1.98638e+10	2.32504e+10	2.59403e+10	2.06737e+10	2.37982e+10	2.94418e+10	4.09074e+10	4.69854e+10	3.35642e+10	3.2771e+10	3.3414e+10	3.26453e+10	3.06434e+10
Russian Federation	Gross capital formation	9.61198e+10	1.12205e+11	1.09258e+11	1.24846e+11	1.40097e+11	1.53396e+11	1.80583e+11	2.20376e+11	2.43499e+11	1.43651e+11	1.84651e+11	2.23377e+11	2.26645e+11	2.12855e+11
Rwanda	Gross capital formation	2.7264e+08	2.89195e+08	3.10342e+08	3.42119e+08	3.91064e+08	4.51131e+08	5.30348e+08	6.64755e+08	8.78175e+08	9.00718e+08	9.66458e+08	1.08308e+09	1.32483e+09	1.42655e+09
Saint Kitts and Nevis	Gross capital formation	2.1884e+08	2.40287e+08	2.13369e+08	2.15543e+08	2.07991e+08	2.29394e+08	2.40503e+08	2.6209e+08	2.48224e+08	2.30716e+08	1.84279e+08	1.60094e+08	1.50105e+08	1.68345e+08
Saint Lucia	Gross capital formation	2.51835e+08	2.3195e+08	2.07967e+08	1.99714e+08	2.21534e+08	2.69774e+08	3.56452e+08	3.43325e+08	3.97158e+08	3.5878e+08	3.463e+08	3.53641e+08	3.20069e+08	2.76187e+08
Samoa	Gross capital formation	4.76127e+07	5.19893e+07	4.89615e+07	4.85451e+07	4.64229e+07	4.52005e+07	4.27752e+07	4.24053e+07	3.86677e+07	4.04994e+07	4.04674e+07	4.07943e+07	4.18428e+07	4.20238e+07
San Marino	Gross capital formation	5.4602e+08	6.25678e+08	6.7637e+08	7.00991e+08	6.96647e+08	7.08233e+08	7.03888e+08	7.03888e+08	6.94762e+08	4.93514e+08	4.13063e+08	3.41137e+08	2.85302e+08	3.01346e+08
Sao Tome and Principe	Gross capital formation	2.59968e+07	2.70531e+07	2.51211e+07	2.71357e+07	2.70183e+07	2.6911e+07	2.46944e+07	3.17619e+07	3.10481e+07	2.73704e+07	3.62865e+07	3.90443e+07	3.83415e+07	4.11442e+07
Saudi Arabia	Gross capital formation	3.92422e+10	3.78172e+10	4.24765e+10	4.72497e+10	5.4336e+10	6.62666e+10	8.16258e+10	1.02234e+11	1.217e+11	1.13815e+11	1.31163e+11	1.47478e+11	1.45889e+11	1.51432e+11
Senegal	Gross capital formation	1.5213e+09	1.58623e+09	1.35644e+09	1.71143e+09	1.73184e+09	2.13283e+09	2.08788e+09	2.61927e+09	2.485e+09	2.08005e+09	1.96903e+09	2.09411e+09	2.51797e+09	2.78534e+09
Serbia	Gross capital formation	3.30417e+09	3.13579e+09	4.32335e+09	5.30293e+09	6.2818e+09	6.49889e+09	7.58846e+09	9.54983e+09	1.03348e+10	8.00482e+09	7.48219e+09	7.82288e+09	8.85888e+09	7.79482e+09
Seychelles	Gross capital formation	2.50376e+08	1.89907e+08	2.5109e+08	7.76935e+07	1.55774e+08	3.22727e+08	2.70647e+08	2.83879e+08	2.34206e+08	2.2677e+08	3.47022e+08	3.59355e+08	4.2906e+08	4.91313e+08
Sierra Leone	Gross capital formation	8.31682e+07	1.04375e+08	1.32312e+08	1.4966e+08	1.51073e+08	1.86537e+08	1.79047e+08	1.79504e+08	1.9113e+08	2.07287e+08	6.8494e+08	9.71422e+08	7.5066e+08	5.98787e+08
Singapore	Gross capital formation	3.20759e+10	2.55625e+10	2.38188e+10	1.67795e+10	2.51516e+10	2.50542e+10	2.94051e+10	3.43133e+10	4.45902e+10	3.60774e+10	4.05812e+10	4.63737e+10	5.50764e+10	5.36667e+10
Sint Maarten (Dutch part)	Gross capital formation						1.32961e+08	1.37989e+08	1.59274e+08	1.66816e+08	1.60447e+08	1.44972e+08	1.3419e+08	1.19777e+08	1.3575e+08
Slovakia	Gross capital formation	1.02913e+10	1.19434e+10	1.2057e+10	1.0962e+10	1.26059e+10	1.45487e+10	1.54514e+10	1.69075e+10	1.789e+10	1.26654e+10	1.50527e+10	1.61987e+10	1.39272e+10	1.39156e+10
Slovenia	Gross capital formation	8.499e+09	8.32669e+09	8.57341e+09	9.28521e+09	1.02418e+10	1.03147e+10	1.15693e+10	1.36216e+10	1.40614e+10	9.52689e+09	8.9297e+09	8.77126e+09	7.32639e+09	7.49066e+09
Solomon Islands	Gross capital formation	3.21495e+07	3.03946e+07	2.13292e+07	3.31653e+07	4.54023e+07	7.39322e+07	7.23319e+07	9.45846e+07	9.50951e+07	8.0099e+07	1.20204e+08	1.1921e+08	1.02172e+08	1.41148e+08
Somalia	Gross capital formation	4.5475e+08	4.88965e+08	4.70997e+08	4.69698e+08	4.71577e+08	4.70912e+08	4.99111e+08	5.05481e+08	5.17077e+08	5.34048e+08	5.4624e+08	5.59992e+08	5.75454e+08	5.89957e+08
South Africa	Gross capital formation	3.13181e+10	3.14348e+10	3.43092e+10	3.82525e+10	4.4415e+10	4.72108e+10	5.32512e+10	5.77278e+10	6.2701e+10	5.73687e+10	5.80133e+10	6.34082e+10	6.67033e+10	6.77287e+10
South Sudan	Gross capital formation									1.36108e+09	9.59361e+08	1.00774e+09	1.0799e+09	5.06775e+08	5.95799e+08
Spain	Gross capital formation	2.65094e+11	2.77033e+11	2.89105e+11	3.07967e+11	3.24417e+11	3.47356e+11	3.74301e+11	3.91177e+11	3.77165e+11	3.12394e+11	3.00645e+11	2.81445e+11	2.58138e+11	2.48524e+11
Sri Lanka	Gross capital formation	4.96777e+09	4.30136e+09	4.51912e+09	5.10952e+09	5.83156e+09	6.37891e+09	7.22721e+09	7.82281e+09	8.16774e+09	8.32746e+09	9.44817e+09	1.02952e+10	1.10548e+10	1.20534e+10
St. Vincent and the Grenadines	Gross capital formation	1.09808e+08	1.19502e+08	1.22102e+08	1.42391e+08	1.42826e+08	1.38093e+08	1.68827e+08	1.69097e+08	1.83066e+08	1.46697e+08	1.48535e+08	1.41338e+08	1.4236e+08	1.51603e+08
State of Palestine	Gross capital formation	1.31996e+09	1.04183e+09	8.82691e+08	1.12371e+09	1.15831e+09	1241300000	1.14493e+09	8.93756e+08	1.2065e+09	1.40134e+09	1.36292e+09	1.33384e+09	1.58744e+09	1.65584e+09
Sudan	Gross capital formation									7.03843e+09	7.8432e+09	8.75618e+09	8.36419e+09	8.1834e+09	8.50658e+09
Sudan (Former)	Gross capital formation	2.21786e+09	3.41711e+09	4.54591e+09	6.07429e+09	7.26554e+09	8.69684e+09	7.86989e+09	8.09289e+09	8.39951e+09	8.74329e+09	9.69103e+09
Suriname	Gross capital formation	7.4022e+08	8.64389e+08	7.95343e+08	6.98812e+08	9.20011e+08	9.99087e+08	9.31799e+08	1.12594e+09	1.12492e+09	1.31265e+09	9.95724e+08	1.26132e+09	1.2919e+09	1.25886e+09
Swaziland	Gross capital formation	4.21799e+08	4.99594e+08	4.62683e+08	4.52642e+08	3.85119e+08	3.88619e+08	3.42053e+08	3.41004e+08	3.13671e+08	2.94235e+08	2.82418e+08	2.7455e+08	2.70809e+08	5.91354e+08
Sweden	Gross capital formation	7.70698e+10	7.7798e+10	7.54049e+10	7.8022e+10	8.15092e+10	8.56045e+10	9.44323e+10	1.04777e+11	1.0319e+11	8.29448e+10	9.66053e+10	1.04033e+11	9.88494e+10	9.89823e+10
Switzerland	Gross capital formation	9.02234e+10	9.17556e+10	9.08127e+10	9.15048e+10	8.64354e+10	9.79282e+10	1.02972e+11	9.95802e+10	1.06777e+11	1.11549e+11	1.06053e+11	1.18832e+11	1.06359e+11	9.75399e+10
Syrian Arab Republic	Gross capital formation	2.38857e+09	2.60427e+09	3.01958e+09	3.54929e+09	3.94005e+09	5.22702e+09	3.50798e+09	4.5571e+09	5.91901e+09	5.37083e+09	5.04509e+09	4.91896e+09	3.59084e+09	2.62131e+09
Tajikistan	Gross capital formation	1.49904e+08	2.08635e+08	2.20607e+08	2.71388e+08	2.62601e+08	2.69335e+08	2.94619e+08	3.27827e+08	3.61149e+08	2.77346e+08	2.98191e+08	3.37765e+08	2.63879e+08	2.77108e+08
TFYR of Macedonia	Gross capital formation	1.09654e+09	1.02913e+09	1.21457e+09	1.1532e+09	1.3683e+09	1.24204e+09	1.35986e+09	1.53969e+09	1.8836e+09	1.86927e+09	1.80389e+09	2.12088e+09	2.33684e+09	2.15181e+09
Thailand	Gross capital formation	3.34948e+10	3.40151e+10	3.64471e+10	4.09268e+10	4.73308e+10	5.75921e+10	5.41378e+10	5.48426e+10	5.99146e+10	4.50387e+10	5.94447e+10	6.0791e+10	6.87491e+10	7.22188e+10
Timor-Leste	Gross capital formation	1.5367e+08	1.81536e+08	1.63073e+08	1.30783e+08	9.58103e+07	93253984	5.56846e+07	9.07168e+07	1.70221e+08	4.05724e+08	4.41454e+08	6.17929e+08	5.85808e+08	5.50235e+08
Togo	Gross capital formation	2.9135e+08	3.04604e+08	3.25666e+08	2.75979e+08	2.96915e+08	3.57037e+08	3.83056e+08	3.34615e+08	3.85792e+08	4.63264e+08	5.41175e+08	6.00233e+08	7.2425e+08	7.38182e+08
Tonga	Gross capital formation	4.67897e+07	5.91362e+07	6.35274e+07	5.71305e+07	5.60566e+07	5.87225e+07	5.82182e+07	5.71734e+07	5.57684e+07	7.0359e+07	7.8645e+07	1.00729e+08	9.69822e+07	6.70085e+07
Trinidad and Tobago	Gross capital formation	1.73862e+09	2.48564e+09	2.17796e+09	3.498e+09	3.14132e+09	4.82288e+09	3.11047e+09	2.96954e+09	3.05886e+09	1.60723e+09	1.36015e+09	1.48977e+09	1.40416e+09	1.40976e+09
Tunisia	Gross capital formation	6.60067e+09	7.11251e+09	6.73467e+09	7.13903e+09	7.43482e+09	6.99641e+09	8.03666e+09	8.41832e+09	9.20371e+09	8.87556e+09	9.69516e+09	7.92183e+09	8.3533e+09	8.02943e+09
Turkey	Gross capital formation	7.3852e+10	4.87181e+10	6.26978e+10	6.94678e+10	8.15425e+10	9.65469e+10	1.09381e+11	1.15749e+11	1.10199e+11	7.8632e+10	1.16695e+11	1.36312e+11	1.24783e+11	1.38861e+11
Turkmenistan	Gross capital formation	3.84412e+09	3.66171e+09	3.19037e+09	3.03871e+09	2.89378e+09	3.25194e+09	3.07039e+09	3.2508e+09	6.35478e+09	9.91157e+09	1.22867e+10	1.37625e+10	1.38972e+10	1.64428e+10
Turks and Caicos Islands	Gross capital formation	6.77565e+07	7.5028e+07	9.57455e+07	1.13708e+08	1.56617e+08	223794000	3.16093e+08	3.34817e+08	3.31942e+08	1.88232e+08	1.29616e+08	9.61117e+07	1.05753e+08	1.08551e+08
Tuvalu	Gross capital formation	2.71187e+06	1.49041e+07	1.8398e+07	1.86696e+07	1.49676e+07	1.36958e+07	9.65164e+06	1.22622e+07	1.45948e+07	1.14761e+07	1.08646e+07	1.29191e+07	1.26249e+07	1.3015e+07
U.R. of Tanzania: Mainland	Gross capital formation	2.81401e+09	3.14319e+09	3.38771e+09	3.85174e+09	4.24478e+09	5.01906e+09	5.81746e+09	6.6483e+09	6.87358e+09	6.2015e+09	7.60313e+09	9.86433e+09	9.28221e+09	1.02885e+10
Uganda	Gross capital formation	2.00868e+09	2.12234e+09	2.32369e+09	2.5891e+09	2.89828e+09	3.4976e+09	3.88365e+09	4.46501e+09	4.72647e+09	5.15146e+09	5.8138e+09	5.91888e+09	6.45457e+09	6.6877e+09
Ukraine	Gross capital formation	1.1774e+10	1.37916e+10	1.35449e+10	1.6778e+10	1.76502e+10	2.00846e+10	2.37794e+10	2.98119e+10	3.03003e+10	1.31951e+10	1.49014e+10	1.73547e+10	1.62848e+10	1.64661e+10
United Arab Emirates	Gross capital formation	2.52291e+10	2.55739e+10	2.70254e+10	2.89894e+10	2.98077e+10	3.47545e+10	3.99196e+10	5.64641e+10	5.82684e+10	6.25289e+10	5.65857e+10	5.75149e+10	6.32622e+10	6.80736e+10
United Kingdom	Gross capital formation	4.01471e+11	4.08635e+11	4.06658e+11	4.27955e+11	4.35941e+11	4.39916e+11	4.61363e+11	4.86029e+11	4.51126e+11	3.68443e+11	4.30264e+11	4.37607e+11	4.4433e+11	4.64949e+11
United States	Gross capital formation	2.68514e+12	2.56865e+12	2.58467e+12	2.68743e+12	2.88804e+12	3040750000000	3.11132e+12	3.04241e+12	2.82986e+12	2.35184e+12	2.57644e+12	2.65046e+12	2.81191e+12	2.89521e+12
Uruguay	Gross capital formation	2.92146e+09	2.80843e+09	2.22739e+09	2.41162e+09	2.8164e+09	3.07301e+09	3.44562e+09	3.69971e+09	4.62461e+09	4.27073e+09	4.64082e+09	5.21963e+09	6.08697e+09	6.34366e+09
USSR (Former)	Gross capital formation
Uzbekistan	Gross capital formation	2.1508e+09	2.29165e+09	2.45299e+09	2.44693e+09	2.87924e+09	2.86483e+09	2.89927e+09	3.53509e+09	4.40946e+09	5.06702e+09	5.34085e+09	5.50941e+09	7.81759e+09	8.35316e+09
Vanuatu	Gross capital formation	1.02262e+08	7.05989e+07	6.65216e+07	6.06315e+07	8.84287e+07	9.52622e+07	1.27735e+08	1.55421e+08	2.11738e+08	2.10784e+08	1.99886e+08	1.69533e+08	1.41467e+08	1.78832e+08
Venezuela	Gross capital formation	2.77323e+10	3.14964e+10	2.07906e+10	1.34101e+10	2.56579e+10	3.3474e+10	4.56116e+10	5.84577e+10	5.97388e+10	4.83409e+10	4.88437e+10	5.62643e+10	6.98017e+10	6.00642e+10
Viet Nam	Gross capital formation	1.09693e+10	1.21505e+10	1.36967e+10	1.53214e+10	1.69364e+10	1.88249e+10	2.10526e+10	2.66943e+10	2.83703e+10	2.95937e+10	3.26734e+10	3.04391e+10	3.11617e+10	3.286e+10
Yemen	Gross capital formation	1.65353e+09	2.6046e+09	2.7739e+09	3.16028e+09	3.89999e+09	5.08826e+09	4.80668e+09	4.83632e+09	4.80564e+09	4.40137e+09	4.97781e+09	4.6068e+09	5.10523e+09	4.9835e+09
Yemen Arab Republic (Former)	Gross capital formation
Yemen Democratic (Former)	Gross capital formation
Yugoslavia (Former)	Gross capital formation
Zambia	Gross capital formation	8.76698e+08	1.1477e+09	1.28584e+09	1.5049e+09	1.65463e+09	1.69935e+09	1.83108e+09	2.11605e+09	2.37409e+09	2.36404e+09	2.60785e+09	2.80289e+09	2.97165e+09	3.18422e+09
Zanzibar	Gross capital formation	3.19727e+07	3.31873e+07	4.07437e+07	4.64539e+07	5.48567e+07	6.74779e+07	7.36564e+07	9.34957e+07	8.57502e+07	9.75089e+07	9.67362e+07	1.05597e+08	1.07864e+08	8.81609e+07
Zimbabwe	Gross capital formation	2.78161e+08	2.06154e+08	8.62645e+07	1.02724e+08	1.22324e+08	94910815	9.14714e+07	8.41672e+07	7.10867e+07	1.13091e+08	1.82206e+08	1.87386e+08	8.67027e+07	1.46376e+08
Afghanistan	Gross Domestic Product (GDP)	3.49525e+09	3.29687e+09	5.43974e+09	5.88735e+09	6.02524e+09	6.62183e+09	7.22847e+09	8.39173e+09	8.58751e+09	1.00667e+10	1.03925e+10	1.12947e+10	1.25292e+10	1.33362e+10
Albania	Gross Domestic Product (GDP)	6.08779e+09	6.57117e+09	6.84922e+09	7.24235e+09	7.65323e+09	8.09401e+09	8.5336e+09	9.03753e+09	9.71863e+09	1.00446e+10	1.0417e+10	1.06821e+10	1.08556e+10	1.09967e+10
Algeria	Gross Domestic Product (GDP)	8.01302e+10	8.25341e+10	8.7156e+10	9.34312e+10	9.74487e+10	1.03198e+11	1.04953e+11	1.08521e+11	1.11125e+11	1.12903e+11	1.16968e+11	1.20243e+11	1.24211e+11	1.27689e+11
Andorra	Gross Domestic Product (GDP)	2.20403e+09	2.33771e+09	2.48795e+09	2.7871e+09	3.012e+09	3.24813e+09	3.39707e+09	3.39972e+09	3.10754e+09	2.9889e+09	2.82905e+09	2.69318e+09	2.64578e+09	2.6441e+09
Angola	Gross Domestic Product (GDP)	2.00667e+10	2.06968e+10	2.37041e+10	2.44863e+10	2.72288e+10	3.28107e+10	3.89134e+10	4.79373e+10	5.45601e+10	5.58641e+10	5.77914e+10	6.00299e+10	6.31514e+10	6.63469e+10
Anguilla	Gross Domestic Product (GDP)	1.70806e+08	1.7461e+08	1.68157e+08	1.78416e+08	2.02445e+08	2.28995e+08	2.74816e+08	3.12333e+08	3.08144e+08	2.51232e+08	2.4007e+08	2.50358e+08	2.36679e+08	2.34656e+08
Antigua and Barbuda	Gross Domestic Product (GDP)	8.4619e+08	8.19161e+08	8.43113e+08	8.92973e+08	9.4018e+08	9.97374e+08	1.13079e+09	1.2382e+09	1.23908e+09	1.08994e+09	1.01162e+09	9.91519e+08	1.02441e+09	1.0401e+09
Argentina	Gross Domestic Product (GDP)	2.01963e+11	1.93058e+11	1.72026e+11	1.87228e+11	2.04134e+11	2.22911e+11	2.41555e+11	2.60886e+11	2.68979e+11	2.69115e+11	2.93702e+11	3.18828e+11	3.21845e+11	3.3126e+11
Armenia	Gross Domestic Product (GDP)	2.71033e+09	2.96934e+09	3.41624e+09	3.89591e+09	4.30373e+09	4.90047e+09	5.54723e+09	6.30993e+09	6.74833e+09	5.79344e+09	5.92177e+09	6.19718e+09	6.64122e+09	6.87445e+09
Aruba	Gross Domestic Product (GDP)	2.18801e+09	2.18003e+09	2.13285e+09	2.14277e+09	2.3039e+09	2.33101e+09	2.33702e+09	2.40268e+09	2.34656e+09	2.0944e+09	2.02458e+09	2.09505e+09	2.06765e+09	2.14855e+09
Australia	Gross Domestic Product (GDP)	6.4313e+11	6.6801e+11	6.88577e+11	7.17208e+11	7.40287e+11	7.62377e+11	7.91111e+11	8.20363e+11	8.3466e+11	8.51043e+11	8.701e+11	9.01553e+11	9.25341e+11	9.52152e+11
Austria	Gross Domestic Product (GDP)	2.8893e+11	2.92832e+11	2.97681e+11	2.99932e+11	3.08047e+11	3.14641e+11	3.25184e+11	3.36961e+11	3.42175e+11	3.29175e+11	3.35364e+11	3.45664e+11	3.48719e+11	3.49515e+11
Azerbaijan	Gross Domestic Product (GDP)	7.14785e+09	7.85565e+09	8.5967e+09	9.47451e+09	1.03514e+10	1.32456e+10	1.78112e+10	2.2346e+10	2.47128e+10	2.70284e+10	2.82775e+10	2.7821e+10	2.84057e+10	3.01074e+10
Bahamas	Gross Domestic Product (GDP)	7.09914e+09	7.28553e+09	7.48258e+09	7.38794e+09	7.45317e+09	7706222073	7.90018e+09	8.01446e+09	7.82821e+09	7.50135e+09	7.61679e+09	7.69787e+09	7.77742e+09	7.82933e+09
Bahrain	Gross Domestic Product (GDP)	1.24168e+10	1.27261e+10	1.31523e+10	1.39804e+10	1.49563e+10	1.59687e+10	1.70014e+10	1.84115e+10	1.95607e+10	2.00577e+10	2.09275e+10	2.1367e+10	2.21339e+10	2.33153e+10
Bangladesh	Gross Domestic Product (GDP)	5.08456e+10	5.3527e+10	5.58905e+10	5.88281e+10	6.2517e+10	6.62402e+10	7.06315e+10	7.53426e+10	8.00066e+10	8.45999e+10	8.97346e+10	9.55354e+10	1.01766e+11	1.07886e+11
Barbados	Gross Domestic Product (GDP)	3.68856e+09	3.59266e+09	3.61781e+09	3.69016e+09	3.74183e+09	3891500000	4.11332e+09	4.18324e+09	4.19579e+09	4.02376e+09	4.03584e+09	4.06812e+09	4.06812e+09	4.05592e+09
Belarus	Gross Domestic Product (GDP)	2.10543e+10	2.20492e+10	2.31535e+10	2.47731e+10	2.76039e+10	3.02101e+10	3.32305e+10	3.60811e+10	3.97773e+10	3.98386e+10	4.29225e+10	4.5302e+10	4.60927e+10	4.64872e+10
Belgium	Gross Domestic Product (GDP)	3.55035e+11	3.58317e+11	3.63905e+11	3.67143e+11	3.79753e+11	3.86945e+11	3.97123e+11	4.09038e+11	4.12937e+11	4.02124e+11	4.12182e+11	4.18934e+11	4.19331e+11	4.20483e+11
Belize	Gross Domestic Product (GDP)	8.60021e+08	9.03156e+08	9.49409e+08	1.03796e+09	1.0862e+09	1.1142e+09	1.16525e+09	1.17813e+09	1.21618e+09	1.22485e+09	1.26556e+09	1.29219e+09	1.34161e+09	1.36208e+09
Benin	Gross Domestic Product (GDP)	3.56471e+09	3.78744e+09	3.95489e+09	4.10844e+09	4.23662e+09	4.35801e+09	4.52155e+09	4.73071e+09	4.96812e+09	5.10016e+09	5.23034e+09	5.40426e+09	5.69567e+09	6.01718e+09
Bermuda	Gross Domestic Product (GDP)	4.28357e+09	4.59289e+09	4.52502e+09	4.67935e+09	4.78798e+09	4868135685	5.13802e+09	5.28424e+09	5.36498e+09	5.08148e+09	4.97507e+09	4.80893e+09	4.57644e+09	4.46152e+09
Bhutan	Gross Domestic Product (GDP)	5.59544e+08	6.05448e+08	6.704e+08	7.21849e+08	7.64421e+08	8.1887e+08	8.74975e+08	1.032e+09	1.08088e+09	1.15283e+09	1.28808e+09	1.38973e+09	1.46021e+09	1.49007e+09
Bolivia	Gross Domestic Product (GDP)	8.20135e+09	8.33944e+09	8.54672e+09	8.77845e+09	9.1448e+09	9.54912e+09	1.00072e+10	1.0464e+10	1.11073e+10	1.14802e+10	1.1954e+10	1.25725e+10	1.32233e+10	1.41192e+10
Bosnia and Herzegovina	Gross Domestic Product (GDP)	8.80773e+09	9.04457e+09	9.50051e+09	9.87088e+09	1.04942e+10	1.09036e+10	1.15242e+10	1.2213e+10	1.28963e+10	1.25457e+10	1.26514e+10	1.27726e+10	1.26184e+10	1.29311e+10
Botswana	Gross Domestic Product (GDP)	8.31265e+09	8.33348e+09	8.83928e+09	9.24818e+09	9.49841e+09	9.93122e+09	1.07619e+10	1.16526e+10	1.21072e+10	1.11579e+10	1.21168e+10	1.28529e+10	1.33281e+10	1.41939e+10
Brazil	Gross Domestic Product (GDP)	7.68855e+11	7.78951e+11	7.99656e+11	8.08825e+11	8.55028e+11	8.82044e+11	9.16947e+11	9.72802e+11	1.02302e+12	1.01963e+12	1.09645e+12	1.12641e+12	1.13803e+12	1.1664e+12
British Virgin Islands	Gross Domestic Product (GDP)	8.29686e+08	8.67961e+08	8.38888e+08	7.33502e+08	7.6092e+08	870000000	8.81787e+08	8.87988e+08	8.8266e+08	9.17139e+08	9.29062e+08	9.14433e+08	8.72045e+08	8.69248e+08
Brunei Darussalam	Gross Domestic Product (GDP)	8.6021e+09	8.83823e+09	9.18043e+09	9.44697e+09	9.4946e+09	9.53144e+09	9.95056e+09	9.9657e+09	9.77281e+09	9.6002e+09	9.84971e+09	1.01875e+10	1.02841e+10	1.0104e+10
Bulgaria	Gross Domestic Product (GDP)	2.27123e+10	2.35751e+10	2.46313e+10	2.59508e+10	2.76531e+10	2.93e+10	3.11958e+10	3.33506e+10	3.52698e+10	3.35021e+10	3.37217e+10	3.439e+10	3.45593e+10	3.49277e+10
Burkina Faso	Gross Domestic Product (GDP)	4.01199e+09	4.27732e+09	4.46352e+09	4.81177e+09	5.02728e+09	5.46272e+09	5.80433e+09	6.04296e+09	6.39346e+09	6.58282e+09	7.13883e+09	7.61191e+09	8.21782e+09	8.7717e+09
Burundi	Gross Domestic Product (GDP)	1.0241e+09	1.04562e+09	1.09266e+09	1.07955e+09	1.12705e+09	1.11689e+09	1.17759e+09	1.25248e+09	1.42304e+09	1.83386e+09	2.12227e+09	2.21183e+09	2.3054e+09	2.4119e+09
Cabo Verde	Gross Domestic Product (GDP)	8.50706e+08	9.02915e+08	9.50612e+08	9.95131e+08	1.03772e+09	1.10539e+09	1.2175e+09	1.3228e+09	1.41077e+09	1.39285e+09	1.41328e+09	1.46937e+09	1.48754e+09	1.49533e+09
Cambodia	Gross Domestic Product (GDP)	4.02664e+09	4.35473e+09	4.64123e+09	5.03602e+09	5.55678e+09	6.29305e+09	6.97087e+09	7.68278e+09	8.19688e+09	8.204e+09	8.6932e+09	9.30777e+09	9.98848e+09	1.07336e+10
Cameroon	Gross Domestic Product (GDP)	1.38271e+10	1.44513e+10	1.50307e+10	1.56366e+10	1.62154e+10	1.65879e+10	1.71227e+10	1.76801e+10	1.819e+10	1.85414e+10	1.91475e+10	1.99403e+10	2.08553e+10	2.20152e+10
Canada	Gross Domestic Product (GDP)	1.0306e+12	1.04501e+12	1.0732e+12	1.09459e+12	1.12814e+12	1.16418e+12	1.19226e+12	1.21855e+12	1.23197e+12	1.19588e+12	1.235e+12	1.27075e+12	1.29419e+12	1.31472e+12
Cayman Islands	Gross Domestic Product (GDP)	2.71316e+09	2.72826e+09	2.77533e+09	2.83083e+09	2.85625e+09	3.04176e+09	3.18171e+09	3.28234e+09	3.27061e+09	3.03511e+09	2.95269e+09	2.97833e+09	3.01961e+09	3.06147e+09
Central African Republic	Gross Domestic Product (GDP)	1.4444e+09	1.45351e+09	1.44464e+09	1.34277e+09	1.37994e+09	1.41281e+09	1.47997e+09	1.53963e+09	1.57986e+09	1.60999e+09	1.66737e+09	1.70139e+09	1.75071e+09	1.12045e+09
Chad	Gross Domestic Product (GDP)	2.94401e+09	3.28309e+09	3.56259e+09	4.07165e+09	5.44266e+09	5.87338e+09	5.88326e+09	5.89187e+09	5.91186e+09	6.15425e+09	6.96661e+09	7.00841e+09	7.64617e+09	7.90614e+09
Chile	Gross Domestic Product (GDP)	9.86576e+10	1.01989e+11	1.04217e+11	1.08299e+11	1.15897e+11	1.23056e+11	1.30063e+11	1.36776e+11	1.41279e+11	1.39815e+11	1.47872e+11	1.56506e+11	1.64929e+11	1.71649e+11
China	Gross Domestic Product (GDP)	1.43596e+12	1.55515e+12	1.69667e+12	1.8665e+12	2.05502e+12	2.28724e+12	2.57718e+12	2.94314e+12	3.2267e+12	3.52401e+12	3.89088e+12	4.25273e+12	4.57817e+12	4.93069e+12
China: Hong Kong SAR	Gross Domestic Product (GDP)	1.47644e+11	1.48472e+11	1.50932e+11	1.55545e+11	1.69078e+11	1.81569e+11	1.94338e+11	2.06902e+11	2.11305e+11	2.06108e+11	2.20057e+11	2.30589e+11	2.3416e+11	2.41027e+11
China: Macao SAR	Gross Domestic Product (GDP)	6.78666e+09	6.98266e+09	7.60435e+09	8.56134e+09	1.08628e+10	1.17926e+10	1.34933e+10	1.54267e+10	1.59499e+10	1.6223e+10	2.06841e+10	2.5088e+10	2.73809e+10	3.0636e+10
Colombia	Gross Domestic Product (GDP)	1.22698e+11	1.24756e+11	1.2788e+11	1.32891e+11	1.39978e+11	1.46566e+11	1.56383e+11	1.67174e+11	1.73103e+11	1.75962e+11	1.82951e+11	1.95007e+11	2.02902e+11	2.1154e+11
Comoros	Gross Domestic Product (GDP)	3.37525e+08	3.48762e+08	3.63234e+08	3.72222e+08	3.71329e+08	3.87036e+08	3.91844e+08	3.93768e+08	3.95973e+08	4.00328e+08	4.08335e+08	4.18952e+08	4.3152e+08	4.46926e+08
Congo	Gross Domestic Product (GDP)	4.98849e+09	5.17853e+09	5.41585e+09	5.45961e+09	5.65453e+09	6.08692e+09	6.4668e+09	6.36376e+09	6.74108e+09	7.24671e+09	7.87824e+09	8.14552e+09	8.45741e+09	8.73412e+09
Cook Islands	Gross Domestic Product (GDP)	1.61203e+08	1.6779e+08	1.73226e+08	1.80686e+08	1.84663e+08	1.82558e+08	1.91693e+08	1.91307e+08	1.84584e+08	1.86519e+08	1.8098e+08	1.82752e+08	1.90797e+08	1.96903e+08
Costa Rica	Gross Domestic Product (GDP)	1.6341e+10	1.65169e+10	1.69962e+10	1.80847e+10	1.8855e+10	1.99649e+10	2.17178e+10	2.34412e+10	2.40815e+10	2.38369e+10	2.50178e+10	2.61462e+10	2.74885e+10	2.84498e+10
Côte d'Ivoire	Gross Domestic Product (GDP)	1.70856e+10	1.71054e+10	1.68202e+10	1.6591e+10	1.67955e+10	1.70849e+10	1.72042e+10	1.74806e+10	1.78855e+10	1.85648e+10	1.90098e+10	1.81161e+10	1.98921e+10	2.16843e+10
Croatia	Gross Domestic Product (GDP)	3.64545e+10	3.77065e+10	3.96848e+10	4.18904e+10	4.36007e+10	4.54161e+10	4.75894e+10	5.00402e+10	5.10677e+10	4.7297e+10	4.64924e+10	4.63616e+10	4.53475e+10	4.49216e+10
Cuba	Gross Domestic Product (GDP)	3.33777e+10	3.44398e+10	3.49318e+10	3.62562e+10	3.83485e+10	42644200000	4.77896e+10	5.12601e+10	5.33704e+10	5.41438e+10	5.54369e+10	5.69908e+10	5.87087e+10	6.02857e+10
Curaçao	Gross Domestic Product (GDP)	2.14725e+09	2.17751e+09	2.18622e+09	2.2212e+09	2.25229e+09	2.34464e+09	2.41732e+09	2.48984e+09	2.66164e+09	2.70955e+09	2.78542e+09	2.84948e+09	2.94066e+09	2.97889e+09
Cyprus	Gross Domestic Product (GDP)	1.55522e+10	1.61082e+10	1.66272e+10	1.70907e+10	1.78391e+10	1.85283e+10	1.93653e+10	2.03128e+10	2.10483e+10	2.06184e+10	2.09052e+10	2.09598e+10	2.04599e+10	1.9364e+10
Czech Republic	Gross Domestic Product (GDP)	1.12177e+11	1.156e+11	1.17504e+11	1.21737e+11	1.2776e+11	1.3599e+11	1.45342e+11	1.53378e+11	1.57536e+11	1.49908e+11	1.53349e+11	1.5636e+11	1.55096e+11	1.54008e+11
Czechoslovakia (Former)	Gross Domestic Product (GDP)
D.P.R. of Korea	Gross Domestic Product (GDP)	1.15081e+10	1.19403e+10	1.20838e+10	1.23035e+10	1.25589e+10	1.30312e+10	1.28976e+10	1.27445e+10	1.31394e+10	1.302e+10	1.29585e+10	1.30618e+10	1.32327e+10	1.33339e+10
D.R. of the Congo	Gross Domestic Product (GDP)	9.92534e+09	9.71686e+09	1.00032e+10	1.05611e+10	1.12729e+10	1.19646e+10	1.26012e+10	1.33897e+10	1.42236e+10	1.46296e+10	1.56695e+10	1.67465e+10	1.79334e+10	1.94546e+10
Denmark	Gross Domestic Product (GDP)	2.47447e+11	2.49484e+11	2.50647e+11	2.51625e+11	2.58265e+11	2.64559e+11	2.74604e+11	2.76868e+11	2.7488e+11	2.60894e+11	2.65134e+11	2.68523e+11	2.66408e+11	2.66033e+11
Djibouti	Gross Domestic Product (GDP)	6.17273e+08	6.29619e+08	6.45989e+08	6.6666e+08	6.8666e+08	7.08633e+08	7.9863e+08	8.38561e+08	8.80489e+08	9.28916e+08	9.70717e+08	1.0144e+09	1.06309e+09	1.11625e+09
Dominica	Gross Domestic Product (GDP)	3.29002e+08	3.30117e+08	3.23391e+08	3.48177e+08	3.57351e+08	3.56196e+08	3.7248e+08	3.94665e+08	4.25511e+08	4.20705e+08	4.25651e+08	4.26435e+08	4.21563e+08	4.17851e+08
Dominican Republic	Gross Domestic Product (GDP)	2.81122e+10	2.86208e+10	3.02774e+10	3.02007e+10	3.05969e+10	3.3431e+10	3.69985e+10	4.0134e+10	4.22433e+10	4.37024e+10	4.70899e+10	4.92009e+10	5.11137e+10	5.31911e+10
Ecuador	Gross Domestic Product (GDP)	3.27533e+10	3.40686e+10	3.54643e+10	3.643e+10	3.94212e+10	41507100000	4.33349e+10	4.4284e+10	4.70991e+10	4.73659e+10	4.90357e+10	5.2894e+10	5.56552e+10	5.82385e+10
Egypt	Gross Domestic Product (GDP)	7.88344e+10	8.16126e+10	8.42124e+10	8.6835e+10	9.04133e+10	9.44563e+10	1.00921e+11	1.08074e+11	1.15807e+11	1.21233e+11	1.27464e+11	1.29719e+11	1.32573e+11	1.35357e+11
El Salvador	Gross Domestic Product (GDP)	1.52191e+10	1.54791e+10	1.58415e+10	1.62059e+10	1.65058e+10	1.70938e+10	1.77625e+10	1.84446e+10	1.86795e+10	1.80943e+10	1.83413e+10	1.87479e+10	1.91006e+10	1.94205e+10
Equatorial Guinea	Gross Domestic Product (GDP)	2.15838e+09	3.62177e+09	4.36181e+09	4.98991e+09	6.61662e+09	7.2055e+09	7.60901e+09	9.43518e+09	1.09542e+10	1.14034e+10	1.15516e+10	1.14823e+10	1.20909e+10	1.15054e+10
Eritrea	Gross Domestic Product (GDP)	9.67942e+08	1.05269e+09	1.08433e+09	1.05553e+09	1.07086e+09	1.09842e+09	1.08778e+09	1.1033e+09	9.95363e+08	1.03395e+09	1.05664e+09	1.14833e+09	1.22894e+09	1.24295e+09
Estonia	Gross Domestic Product (GDP)	9.91997e+09	1.05308e+10	1.11755e+10	1.20115e+10	1.27895e+10	1.40008e+10	1.54587e+10	1.66801e+10	1.57913e+10	1.34641e+10	1.37975e+10	1.49394e+10	1.56341e+10	1.58889e+10
Ethiopia	Gross Domestic Product (GDP)	8.9043e+09	9.64348e+09	9.78954e+09	9.57798e+09	1.0878e+10	1.21636e+10	1.34815e+10	1.50259e+10	1.6647e+10	1.81124e+10	2.03856e+10	2.26449e+10	2.46207e+10	2.71721e+10
Ethiopia (Former)	Gross Domestic Product (GDP)
Fiji	Gross Domestic Product (GDP)	2.66693e+09	2.72027e+09	2.80732e+09	2.83539e+09	2.98566e+09	3.00656e+09	3.06226e+09	3.09007e+09	3.05948e+09	3.0197e+09	3.01366e+09	3.07394e+09	3.12005e+09	3.26494e+09
Finland	Gross Domestic Product (GDP)	1.79902e+11	1.84545e+11	1.87646e+11	1.91388e+11	1.98902e+11	2.04431e+11	2.12721e+11	2.2375e+11	2.25363e+11	2.06727e+11	2.12913e+11	2.18387e+11	2.15202e+11	2.12607e+11
France	Gross Domestic Product (GDP)	2.02998e+12	2.06967e+12	2.09281e+12	2.10996e+12	2.16876e+12	2.20363e+12	2.25596e+12	2.30923e+12	2.31375e+12	2.24568e+12	2.28983e+12	2.33744e+12	2.34526e+12	2.35194e+12
French Polynesia	Gross Domestic Product (GDP)	5.13653e+09	5.20876e+09	5.3193e+09	5.50272e+09	5.62378e+09	5.70278e+09	5.75351e+09	5.92107e+09	6.01763e+09	5.77912e+09	5.81176e+09	5.83476e+09	5.85203e+09	5.83867e+09
Gabon	Gross Domestic Product (GDP)	9.12486e+09	9.24317e+09	9.17192e+09	9.40061e+09	9.47529e+09	9.57897e+09	9.27977e+09	9.86738e+09	9.52652e+09	9.45278e+09	1.00999e+10	1.08156e+10	1.13844e+10	1.20202e+10
Gambia	Gross Domestic Product (GDP)	5.30718e+08	5.61416e+08	5.63982e+08	5.76972e+08	6.30107e+08	6.24173e+08	6.31187e+08	6.54106e+08	6.91617e+08	7.36226e+08	7.84262e+08	7.50314e+08	7.96044e+08	8.40988e+08
Georgia	Gross Domestic Product (GDP)	4.50121e+09	4.71751e+09	4.97574e+09	5.52596e+09	5.84976e+09	6.41094e+09	7.01254e+09	7.87773e+09	8.06003e+09	7.7557e+09	8.24066e+09	8.83181e+09	9.3778e+09	9.67658e+09
Germany	Gross Domestic Product (GDP)	2.77736e+12	2.82445e+12	2.82475e+12	2.8044e+12	2.83751e+12	2.85756e+12	2.96357e+12	3.06048e+12	3.09268e+12	2.91831e+12	3.03769e+12	3.14675e+12	3.15859e+12	3.16194e+12
Ghana	Gross Domestic Product (GDP)	1.33355e+10	1.39408e+10	1.4609e+10	1.53722e+10	1.61951e+10	1.71985e+10	1.79813e+10	1.91429e+10	2.07567e+10	2.17235e+10	2.33136e+10	2.68122e+10	2.91686e+10	3.12495e+10
Greece	Gross Domestic Product (GDP)	2.04953e+11	2.12612e+11	2.19336e+11	2.33895e+11	2.45479e+11	2.47666e+11	2.62068e+11	2.71339e+11	2.70133e+11	2.58261e+11	2.44189e+11	2.22544e+11	2.07917e+11	2.01024e+11
Greenland	Gross Domestic Product (GDP)	1.52741e+09	1.54679e+09	1.53177e+09	1.52595e+09	1.59099e+09	1.65035e+09	1.73906e+09	1.79809e+09	1.83528e+09	1.82261e+09	1.8688e+09	1.90998e+09	1.90406e+09	1.86729e+09
Grenada	Gross Domestic Product (GDP)	5.56992e+08	5.45721e+08	5.64466e+08	6.17893e+08	6.13896e+08	6.9537e+08	6.67611e+08	7.08489e+08	7.15209e+08	6.67908e+08	6.64508e+08	6.69579e+08	6.57355e+08	6.67562e+08
Guatemala	Gross Domestic Product (GDP)	2.34421e+10	2.39887e+10	2.49163e+10	2.55469e+10	2.63521e+10	2.72112e+10	2.86751e+10	3.04828e+10	3.1483e+10	3.16486e+10	3.25568e+10	3.39118e+10	3.49189e+10	3.62076e+10
Guinea	Gross Domestic Product (GDP)	2.5229e+09	2.61624e+09	2.75229e+09	2.78531e+09	2.84938e+09	2.93486e+09	2.96275e+09	3.01486e+09	3.16077e+09	3.15739e+09	3.2178e+09	3.34329e+09	3.47368e+09	3.56052e+09
Guinea-Bissau	Gross Domestic Product (GDP)	5.33896e+08	5.44402e+08	5.37064e+08	5.39162e+08	5.51161e+08	5.86792e+08	6.00344e+08	6.19585e+08	6.3944e+08	6.61168e+08	6.90564e+08	7.27434e+08	7.1652e+08	7.18661e+08
Guyana	Gross Domestic Product (GDP)	1.26988e+09	1.29845e+09	1.3121e+09	1.29891e+09	1.34169e+09	1.31544e+09	1.38292e+09	1.47972e+09	1.50932e+09	1.55912e+09	1.62772e+09	1.71562e+09	1.79797e+09	1.89326e+09
Haiti	Gross Domestic Product (GDP)	3.91241e+09	3.87162e+09	3.86179e+09	3.87578e+09	3.73939e+09	3.8067e+09	3.89246e+09	4.0226e+09	4.05655e+09	4.18162e+09	3.95172e+09	4.17e+09	4.29031e+09	4.47465e+09
Honduras	Gross Domestic Product (GDP)	7.77252e+09	7.98418e+09	8.28393e+09	8.66061e+09	9.20037e+09	9.75707e+09	1.03978e+10	1.10413e+10	1.15085e+10	1.12286e+10	1.16476e+10	1.20943e+10	1.25616e+10	1.28836e+10
Hungary	Gross Domestic Product (GDP)	9.10429e+10	9.44435e+10	9.8685e+10	1.02414e+11	1.07319e+11	1.1189e+11	1.16324e+11	1.16919e+11	1.17946e+11	1.10219e+11	1.11089e+11	1.13096e+11	1.11425e+11	1.13124e+11
Iceland	Gross Domestic Product (GDP)	1.36769e+10	1.41916e+10	1.42559e+10	1.46425e+10	1.58474e+10	1.67985e+10	1.75096e+10	1.92119e+10	1.94327e+10	1.84324e+10	1.78915e+10	1.8273e+10	1.84825e+10	1.91219e+10
India	Gross Domestic Product (GDP)	5.98073e+11	6.29274e+11	6.52977e+11	7.07637e+11	7.66345e+11	8.37499e+11	9.15085e+11	1.00478e+12	1.04387e+12	1.13239e+12	1.25181e+12	1.33146e+12	1.39452e+12	1.46448e+12
Indonesia	Gross Domestic Product (GDP)	2.26918e+11	2.35186e+11	2.45768e+11	2.57516e+11	2.70472e+11	2.85869e+11	3.01594e+11	3.2073e+11	3.40018e+11	3.55757e+11	3.77899e+11	4.02408e+11	4.27614e+11	4.52335e+11
Iran (Islamic Republic of)	Gross Domestic Product (GDP)	1.55414e+11	1.59621e+11	1.72273e+11	1.85867e+11	1.95324e+11	2.05587e+11	2.18136e+11	2.3618e+11	2.40243e+11	2.4989e+11	2.6428e+11	2.70946e+11	2.53159e+11	2.48309e+11
Iraq	Gross Domestic Product (GDP)	3.53661e+10	3.61814e+10	3.36848e+10	2.25347e+10	3.47392e+10	3.6268e+10	3.99521e+10	4.05025e+10	4.31793e+10	4.56875e+10	4.8218e+10	5.3143e+10	5.86125e+10	6.10814e+10
Ireland	Gross Domestic Product (GDP)	1.65931e+11	1.74682e+11	1.8488e+11	1.90347e+11	1.99062e+11	2.10358e+11	2.21864e+11	2.32807e+11	2.26732e+11	2.12288e+11	2.11703e+11	2.17572e+11	2.16891e+11	2.17267e+11
Israel	Gross Domestic Product (GDP)	1.24846e+11	1.24618e+11	1.24533e+11	1.26372e+11	1.32563e+11	1.39082e+11	1.47146e+11	1.5733e+11	1.64337e+11	1.66388e+11	1.75813e+11	1.83853e+11	1.90016e+11	1.96344e+11
Italy	Gross Domestic Product (GDP)	1.76879e+12	1.80015e+12	1.80466e+12	1.80741e+12	1.83603e+12	1.85347e+12	1.89065e+12	1.91853e+12	1.89838e+12	1.79433e+12	1.82502e+12	1.83573e+12	1.7941e+12	1.75957e+12
Jamaica	Gross Domestic Product (GDP)	1.0401e+10	1.05342e+10	1.06053e+10	1.09942e+10	1.11397e+10	1.12393e+10	1.15621e+10	1.17279e+10	1.16441e+10	1.11273e+10	1.09625e+10	1.11489e+10	1.10857e+10	1.1148e+10
Japan	Gross Domestic Product (GDP)	4.30825e+12	4.32356e+12	4.33608e+12	4.40915e+12	4.51324e+12	4.57187e+12	4.64943e+12	4.75135e+12	4.70186e+12	4.44199e+12	4.64863e+12	4.62759e+12	4.69536e+12	4.7666e+12
Jordan	Gross Domestic Product (GDP)	9.24351e+09	9.73064e+09	1.02934e+10	1.07218e+10	1.16404e+10	1.25887e+10	1.36068e+10	1.47195e+10	1.57825e+10	1.66491e+10	1.70339e+10	1.74746e+10	1.79378e+10	1.84453e+10
Kazakhstan	Gross Domestic Product (GDP)	3.48769e+10	3.96017e+10	4.34629e+10	4.75179e+10	5.20731e+10	5.71237e+10	6.32359e+10	6.88911e+10	7.11761e+10	7.20329e+10	7.72883e+10	8.30578e+10	8.72278e+10	9.24832e+10
Kenya	Gross Domestic Product (GDP)	1.78585e+10	1.86563e+10	1.8763e+10	1.93081e+10	2.02935e+10	2.14933e+10	2.28529e+10	2.43442e+10	2.41962e+10	2.49473e+10	2.68718e+10	2.807e+10	2.9647e+10	3.14332e+10
Kiribati	Gross Domestic Product (GDP)	1.09207e+08	1.04009e+08	1.04314e+08	1.08704e+08	1.06841e+08	1.12136e+08	1.10361e+08	1.12819e+08	1.12667e+08	1.13501e+08	1.11663e+08	1.11854e+08	1.1563e+08	1.18983e+08
Kosovo	Gross Domestic Product (GDP)	3.03155e+09	3.81166e+09	3.85611e+09	3.63009e+09	3.5957e+09	3.73427e+09	3.86149e+09	4.182e+09	4.48398e+09	4.63954e+09	4.78853e+09	4.99966e+09	5.1267e+09	5.30613e+09
Kuwait	Gross Domestic Product (GDP)	5.47069e+10	5.48252e+10	5.64801e+10	6.6263e+10	7.30482e+10	8.07979e+10	8.68701e+10	9.2075e+10	9.43584e+10	8.76815e+10	8.23871e+10	9.07989e+10	9.83419e+10	9.79116e+10
Kyrgyzstan	Gross Domestic Product (GDP)	2.04315e+09	2.15188e+09	2.15151e+09	2.30276e+09	2.46457e+09	2.46025e+09	2.53659e+09	2.75328e+09	2.9846e+09	3.07075e+09	3.05627e+09	3.23831e+09	3.23545e+09	3.57628e+09
Lao People's DR	Gross Domestic Product (GDP)	1.9986e+09	2.11355e+09	2.23864e+09	2.37766e+09	2.5446e+09	2.71678e+09	2.95164e+09	3.18312e+09	3.43092e+09	3.6883e+09	3.9882e+09	4.30887e+09	4.6492e+09	5.01965e+09
Latvia	Gross Domestic Product (GDP)	1.14159e+10	1.22325e+10	1.31119e+10	1.42436e+10	1.55135e+10	1.70914e+10	1.90777e+10	2.0946e+10	2.02809e+10	1.74039e+10	1.69038e+10	1.77485e+10	1.86065e+10	1.93912e+10
Lebanon	Gross Domestic Product (GDP)	1.7541e+10	1.82345e+10	1.88497e+10	1.946e+10	2.09153e+10	2.14899e+10	2.18554e+10	2.38969e+10	2.61072e+10	2.87323e+10	3.10418e+10	3.13264e+10	3.21919e+10	3.3162e+10
Lesotho	Gross Domestic Product (GDP)	1.1873e+09	1.23751e+09	1.2441e+09	1.30246e+09	1.33234e+09	1.36835e+09	1.42729e+09	1.49485e+09	1.58055e+09	1.63363e+09	1.74947e+09	1.7991e+09	1.91625e+09	2.02707e+09
Liberia	Gross Domestic Product (GDP)	541077175	660632794	871325600	585251008	555345900	608000000	690080000	762372000	883177000	991760000	1098752000	1162068000	1257076037	1358751305
Libya	Gross Domestic Product (GDP)	3.51939e+10	3.5374e+10	3.49317e+10	3.94605e+10	4.12109e+10	4.54515e+10	4.85038e+10	5.09711e+10	5.84295e+10	5.79933e+10	6.05013e+10	2.34332e+10	4.7917e+10	4.01477e+10
Liechtenstein	Gross Domestic Product (GDP)	3.51429e+09	3.48852e+09	3.45385e+09	3.38693e+09	3.48986e+09	3.65836e+09	3.98591e+09	4.35706e+09	4.23887e+09	3.79343e+09	4.07427e+09	3.90877e+09	3.97366e+09	4.05052e+09
Lithuania	Gross Domestic Product (GDP)	1.79679e+10	1.91717e+10	2.04827e+10	2.25874e+10	2.42519e+10	2.61414e+10	2.80776e+10	3.11905e+10	3.20102e+10	2.72682e+10	2.77096e+10	2.9404e+10	3.05326e+10	3.15271e+10
Luxembourg	Gross Domestic Product (GDP)	3.1791e+10	3.24269e+10	3.34892e+10	3.38877e+10	3.55571e+10	3.70236e+10	3.88308e+10	4.13405e+10	4.15419e+10	3.93262e+10	4.13494e+10	4.24282e+10	4.23591e+10	4.32021e+10
Madagascar	Gross Domestic Product (GDP)	4.50241e+09	4.77204e+09	4.16833e+09	4.57629e+09	4.81686e+09	5.03858e+09	5.29164e+09	5.62188e+09	6.02263e+09	5.78345e+09	5.80544e+09	5.88179e+09	6.04233e+09	6.16318e+09
Malawi	Gross Domestic Product (GDP)	3.25059e+09	3.09472e+09	3.17688e+09	3.35815e+09	3.54017e+09	3.65589e+09	3.82772e+09	4.19518e+09	4.51568e+09	4.89175e+09	5.22802e+09	5.37973e+09	5.48148e+09	5.77679e+09
Malaysia	Gross Domestic Product (GDP)	1.13869e+11	1.14459e+11	1.20629e+11	1.27612e+11	1.36268e+11	1.43534e+11	1.51551e+11	1.61096e+11	1.6888e+11	1.66324e+11	1.78674e+11	1.87836e+11	1.9843e+11	2.07731e+11
Maldives	Gross Domestic Product (GDP)	8.44805e+08	8.72411e+08	9.20903e+08	1.06672e+09	1.19975e+09	1.0908e+09	1.33324e+09	1.5016e+09	1.66324e+09	1.57078e+09	1.6789e+09	1.82145e+09	2.06667e+09	2.14343e+09
Mali	Gross Domestic Product (GDP)	4.02603e+09	4.50329e+09	4.69764e+09	5.05549e+09	5.16929e+09	5.48632e+09	5.77443e+09	6.02256e+09	6.32243e+09	6.60459e+09	6.98864e+09	7.17898e+09	7.18115e+09	7.30376e+09
Malta	Gross Domestic Product (GDP)	5.77237e+09	5.80748e+09	5.98071e+09	6.13285e+09	6.16004e+09	6.39311e+09	6.51003e+09	6.76955e+09	6.99609e+09	6.82383e+09	7.06557e+09	7.22402e+09	7.36578e+09	7.55056e+09
Marshall Islands	Gross Domestic Product (GDP)	1.14981e+08	1.19228e+08	1.24032e+08	1.27961e+08	1.36575e+08	139343268	1.40568e+08	1.42412e+08	1.44477e+08	1.41849e+08	1.5016e+08	1.51057e+08	1.55897e+08	1.57177e+08
Mauritania	Gross Domestic Product (GDP)	1.74194e+09	1.77693e+09	1.78875e+09	1.89569e+09	2.00464e+09	2.18444e+09	2.59663e+09	2.6698e+09	2.66069e+09	2.70267e+09	2.79799e+09	2.9207e+09	3.09503e+09	3.3024e+09
Mauritius	Gross Domestic Product (GDP)	5.49335e+09	5.67726e+09	5.7736e+09	6.11074e+09	6.37536e+09	6.48873e+09	6.80443e+09	7.20576e+09	7.60368e+09	7.83834e+09	8.16105e+09	8.47991e+09	8.75688e+09	9.04274e+09
Mexico	Gross Domestic Product (GDP)	7.88247e+11	7.87988e+11	7.94071e+11	8.0511e+11	8.39005e+11	8.6481e+11	9.07845e+11	9.37122e+11	9.50054e+11	9.04986e+11	9.52037e+11	9.89353e+11	1.02921e+12	1.04404e+12
Micronesia (FS of)	Gross Domestic Product (GDP)	2.43298e+08	2.47319e+08	2.48563e+08	2.52923e+08	2.44636e+08	2.49971e+08	2.496e+08	2.44314e+08	2.38315e+08	2.40422e+08	2.48006e+08	2.52542e+08	2.52546e+08	2.54184e+08
Monaco	Gross Domestic Product (GDP)	3.87179e+09	3.94747e+09	3.99162e+09	4.02432e+09	4.13647e+09	4.20298e+09	4.44772e+09	5.08845e+09	5.11748e+09	4.51036e+09	4.60862e+09	4.91564e+09	4.96106e+09	5.42244e+09
Mongolia	Gross Domestic Product (GDP)	1.84335e+09	1.89778e+09	1.9876e+09	2.12683e+09	2.3528e+09	2.52348e+09	2.73939e+09	3.02012e+09	3.28892e+09	3.24719e+09	3.45389e+09	4.05879e+09	4.56212e+09	5.09786e+09
Montenegro	Gross Domestic Product (GDP)	1.96502e+09	1.98663e+09	2.02445e+09	2.07471e+09	2.16654e+09	2.25712e+09	2.45047e+09	2.71164e+09	2.89936e+09	2.73534e+09	2.80273e+09	2.89321e+09	2.82088e+09	2.91962e+09
Montserrat	Gross Domestic Product (GDP)	4.48098e+07	4.46696e+07	4.56968e+07	4.592e+07	4.80891e+07	4.95963e+07	4.92426e+07	5.08364e+07	5.31002e+07	5.28587e+07	5.1367e+07	5.41727e+07	5.60908e+07	5.72329e+07
Morocco	Gross Domestic Product (GDP)	4.6686e+10	5.02117e+10	5.18767e+10	5.51537e+10	5.78022e+10	5.95238e+10	6.41428e+10	6.58783e+10	6.9559e+10	7.28688e+10	7.55235e+10	7.92887e+10	8.14052e+10	8.49719e+10
Mozambique	Gross Domestic Product (GDP)	4.9613e+09	5.59242e+09	6.08423e+09	6.47974e+09	6.98588e+09	7.5951e+09	8.34329e+09	8.96287e+09	9.48056e+09	1.00947e+10	1.08131e+10	1.16171e+10	1.24394e+10	1.33654e+10
Myanmar	Gross Domestic Product (GDP)	6.51439e+09	7.25338e+09	8.12564e+09	9.25055e+09	1.05054e+10	1.19308e+10	1.34909e+10	1.51087e+10	1.66581e+10	1.84155e+10	2.02861e+10	2.13847e+10	2.30164e+10	2.47427e+10
Namibia	Gross Domestic Product (GDP)	5.93314e+09	6.00302e+09	6.29049e+09	6.38157e+09	7.13034e+09	7.26131e+09	7.7691e+09	8.14685e+09	8.46008e+09	8.33675e+09	8.88662e+09	9.42086e+09	1.00512e+10	1.0494e+10
Nauru	Gross Domestic Product (GDP)	3.71248e+07	3.46148e+07	3.11633e+07	3.1252e+07	2.99035e+07	2.6293e+07	2.10957e+07	2.11724e+07	4.14096e+07	3.38896e+07	4.0701e+07	4.64926e+07	5.59036e+07	7.06613e+07
Nepal	Gross Domestic Product (GDP)	6.95957e+09	7.35129e+09	7.3601e+09	7.65047e+09	8.00871e+09	8.25883e+09	8.56619e+09	8.85843e+09	9.3992e+09	9.82528e+09	1.02985e+10	1.06509e+10	1.11677e+10	1.15751e+10
Netherlands	Gross Domestic Product (GDP)	6.33769e+11	6.44061e+11	6.43845e+11	6.45556e+11	6.57546e+11	6.72357e+11	6.9805e+11	7.27369e+11	7.42483e+11	7.17995e+11	7.25681e+11	7.37754e+11	7.26055e+11	7.20788e+11
Netherlands Antilles (former)	Gross Domestic Product (GDP)	3.0934e+09	3.13699e+09	3.14954e+09	3.20309e+09	3.24152e+09	3.27718e+09	3.35255e+09	3.47995e+09	3.54955e+09	3.54245e+09	3.53302e+09	3.53872e+09	3.54749e+09
New Caledonia	Gross Domestic Product (GDP)	5.28757e+09	5.39332e+09	5.52815e+09	5.7935e+09	6.01945e+09	6.23615e+09	6.59161e+09	6.87111e+09	6.9118e+09	7.07306e+09	7.34871e+09	7.57247e+09	7.73646e+09	7.92265e+09
New Zealand	Gross Domestic Product (GDP)	9.45187e+10	9.77456e+10	1.02494e+11	1.07222e+11	1.11288e+11	1.15064e+11	1.18245e+11	1.21752e+11	1.19796e+11	1.19521e+11	1.21122e+11	1.2427e+11	1.27616e+11	1.31181e+11
Nicaragua	Gross Domestic Product (GDP)	5.41219e+09	5.57243e+09	5.61444e+09	5.75597e+09	6.06174e+09	6.32132e+09	6.58379e+09	6.93193e+09	7.1296e+09	6.93288e+09	7.16183e+09	7.56944e+09	7.94439e+09	8.31034e+09
Niger	Gross Domestic Product (GDP)	2.70186e+09	2.90499e+09	3.05828e+09	3.16225e+09	3.13627e+09	3.36901e+09	3.56361e+09	3.67574e+09	4.02816e+09	3.99945e+09	4.33418e+09	4.43292e+09	4.92396e+09	5.12609e+09
Nigeria	Gross Domestic Product (GDP)	1.09828e+11	1.14673e+11	1.39152e+11	1.53392e+11	1.69466e+11	1.80502e+11	1.91388e+11	2.03732e+11	2.16507e+11	2.3152e+11	2.49671e+11	2.61873e+11	2.7308e+11	2.87811e+11
Norway	Gross Domestic Product (GDP)	2.76894e+11	2.82669e+11	2.86732e+11	2.8937e+11	3.00826e+11	3.08722e+11	3.16116e+11	3.25378e+11	3.26628e+11	3.21329e+11	3.23263e+11	3.26394e+11	3.35366e+11	3.37855e+11
Oman	Gross Domestic Product (GDP)	2.94613e+10	3.11032e+10	3.07608e+10	2.99399e+10	3.03268e+10	3.1082e+10	3.27517e+10	3.421e+10	3.70153e+10	3.92778e+10	4.11641e+10	4.15249e+10	4.39181e+10	4.60336e+10
Pakistan	Gross Domestic Product (GDP)	9.22541e+10	9.40829e+10	9.71166e+10	1.01823e+11	1.09325e+11	1.17708e+11	1.2498e+11	1.3102e+11	1.33249e+11	1.37022e+11	1.39224e+11	1.43102e+11	1.48849e+11	1.57884e+11
Palau	Gross Domestic Product (GDP)	1.59505e+08	1.61578e+08	1.69425e+08	1.72189e+08	1.771e+08	1.88048e+08	1.92793e+08	1.87078e+08	1.83464e+08	1.72906e+08	1.67051e+08	1.6989e+08	1.7957e+08	1.78976e+08
Panama	Gross Domestic Product (GDP)	1.25239e+10	1.25958e+10	1.28765e+10	1.34181e+10	1.44274e+10	15464700000	1.67837e+10	1.88167e+10	2.07205e+10	2.15195e+10	2.31227e+10	2.56344e+10	2.84018e+10	3.07803e+10
Papua New Guinea	Gross Domestic Product (GDP)	4.37429e+09	4.37242e+09	4.46015e+09	4.65581e+09	4.68222e+09	4.8662e+09	4.97779e+09	5.33374e+09	5.68646e+09	6.03541e+09	6.49223e+09	7.22313e+09	7.77744e+09	8.17045e+09
Paraguay	Gross Domestic Product (GDP)	6.70995e+09	6.84902e+09	7.87832e+09	8.21873e+09	8.55219e+09	8.73465e+09	9.15454e+09	9.65086e+09	1.02646e+10	9.85751e+09	1.11482e+10	1.16323e+10	1.14881e+10	1.29816e+10
Peru	Gross Domestic Product (GDP)	6.17058e+10	6.20871e+10	6.5473e+10	6.82e+10	7.15815e+10	7.60804e+10	8.18084e+10	8.87772e+10	9.68942e+10	9.79109e+10	1.06185e+11	1.13036e+11	1.19762e+11	1.26413e+11
Philippines	Gross Domestic Product (GDP)	8.23773e+10	8.47612e+10	8.78516e+10	9.22181e+10	9.83945e+10	1.03096e+11	1.08501e+11	1.1568e+11	1.20484e+11	1.21867e+11	1.31169e+11	1.35941e+11	1.45205e+11	1.55632e+11
Poland	Gross Domestic Product (GDP)	2.62993e+11	2.66163e+11	2.70005e+11	2.79624e+11	2.93984e+11	3.04412e+11	3.23263e+11	3.46544e+11	3.6013e+11	3.69616e+11	3.83288e+11	4.01539e+11	4.08611e+11	4.15427e+11
Portugal	Gross Domestic Product (GDP)	1.88975e+11	1.92647e+11	1.94128e+11	1.92314e+11	1.95798e+11	1.973e+11	2.00364e+11	2.05357e+11	2.05766e+11	1.99638e+11	2.03429e+11	1.99712e+11	1.93091e+11	1.90475e+11
Puerto Rico	Gross Domestic Product (GDP)	8.68206e+10	8.76171e+10	8.76582e+10	9.03187e+10	8.8524e+10	87276200000	8.62618e+10	8.46709e+10	8.30177e+10	8.26746e+10	8.24413e+10	8.08644e+10	8.1041e+10	8.03371e+10
Qatar	Gross Domestic Product (GDP)	3.00845e+10	3.12573e+10	3.35023e+10	3.47486e+10	4.14269e+10	4.45305e+10	5.61847e+10	6.62901e+10	7.79989e+10	8.73249e+10	1.01936e+11	1.15209e+11	1.22263e+11	1.30209e+11
Republic of Korea	Gross Domestic Product (GDP)	7.12756e+11	7.45011e+11	8.00383e+11	8.2386e+11	8.64228e+11	8.98137e+11	9.44626e+11	9.96235e+11	1.02442e+12	1.03167e+12	1.09869e+12	1.13914e+12	1.16526e+12	1.19988e+12
Republic of Moldova	Gross Domestic Product (GDP)	2.12209e+09	2.25242e+09	2.42833e+09	2.58916e+09	2.77981e+09	2.98833e+09	3.13131e+09	3.2252e+09	3.47798e+09	3.26967e+09	3.50162e+09	3.74027e+09	3.71284e+09	4.04148e+09
Romania	Gross Domestic Product (GDP)	7.53605e+10	7.95746e+10	8.36999e+10	8.83237e+10	9.57064e+10	9.96992e+10	1.0773e+11	1.15125e+11	1.24863e+11	1.16039e+11	1.15113e+11	1.16329e+11	1.17074e+11	1.21162e+11
Russian Federation	Gross Domestic Product (GDP)	5.67392e+11	5.96279e+11	6.24565e+11	6.70133e+11	7.18221e+11	7.64016e+11	8.2631e+11	8.96836e+11	9.43901e+11	8.7008e+11	9.09266e+11	9.48038e+11	9.80609e+11	9.9354e+11
Rwanda	Gross Domestic Product (GDP)	1.77939e+09	1.89809e+09	2.14849e+09	2.19581e+09	2.35934e+09	2.5806e+09	2.81871e+09	3.02908e+09	3.34722e+09	3.50888e+09	3.73065e+09	3.98558e+09	4.33584e+09	4.54103e+09
Saint Kitts and Nevis	Gross Domestic Product (GDP)	4.5058e+08	4.73954e+08	4.83027e+08	4.75957e+08	4.96761e+08	5.45868e+08	5.71467e+08	5.83678e+08	6.14176e+08	5.72538e+08	5.5856e+08	5.58281e+08	5.67216e+08	5.78305e+08
Saint Lucia	Gross Domestic Product (GDP)	8.85349e+08	8.42768e+08	8.42357e+08	8.81916e+08	9.48335e+08	9.36511e+08	1.02032e+09	1.03687e+09	1.08985e+09	1.09374e+09	1.09623e+09	1.11148e+09	1.07768e+09	1.0421e+09
Samoa	Gross Domestic Product (GDP)	3.36158e+08	3.63218e+08	3.74739e+08	3.95928e+08	4.13363e+08	4.34261e+08	4.36816e+08	4.638e+08	4.46434e+08	4.4026e+08	4.49581e+08	4.55606e+08	4.62284e+08	4.66822e+08
San Marino	Gross Domestic Product (GDP)	1.72171e+09	1.81825e+09	1.82285e+09	1.89411e+09	1.98146e+09	2.02743e+09	2.10558e+09	2.17914e+09	2.21511e+09	1.93191e+09	1.84211e+09	1.66778e+09	1.54236e+09	1.47296e+09
Sao Tome and Principe	Gross Domestic Product (GDP)	1.04826e+08	1.08038e+08	1.10202e+08	1.17497e+08	1.22804e+08	1.2478e+08	1.4019e+08	1.44038e+08	1.57138e+08	1.63335e+08	1.70784e+08	1.78442e+08	1.8558e+08	1.93504e+08
Saudi Arabia	Gross Domestic Product (GDP)	2.58611e+11	2.60027e+11	2.60359e+11	2.80301e+11	3.0624e+11	3.28461e+11	3.46779e+11	3.67559e+11	3.98533e+11	4.05823e+11	4.35994e+11	4.73358e+11	5.00874e+11	5.20659e+11
Senegal	Gross Domestic Product (GDP)	6.93415e+09	7.2518e+09	7.29928e+09	7.7862e+09	8.24427e+09	8.70782e+09	8.92216e+09	9.36278e+09	9.70757e+09	9.9428e+09	1.03583e+10	1.05299e+10	1.08837e+10	1.11452e+10
Serbia	Gross Domestic Product (GDP)	1.94247e+10	2.03945e+10	2.18458e+10	2.28103e+10	2.48739e+10	2.6252e+10	2.75395e+10	2.91612e+10	3.07262e+10	2.97688e+10	2.99428e+10	3.03624e+10	3.00542e+10	3.08271e+10
Seychelles	Gross Domestic Product (GDP)	9.27967e+08	9.07246e+08	9.18707e+08	8.60554e+08	8.43168e+08	9.19109e+08	1.00555e+09	1.11031e+09	1.08655e+09	1.07452e+09	1.1384e+09	1.22851e+09	1.26297e+09	1.33396e+09
Sierra Leone	Gross Domestic Product (GDP)	9.07479e+08	1.07237e+09	1.35564e+09	1.48182e+09	1.57954e+09	1.65068e+09	1.72035e+09	1.85893e+09	1.95902e+09	2.02163e+09	2.12973e+09	2.25668e+09	2.59973e+09	3.12284e+09
Singapore	Gross Domestic Product (GDP)	9.93506e+10	9.82037e+10	1.0233e+11	1.07017e+11	1.16819e+11	1.25429e+11	1.36635e+11	1.48907e+11	1.5169e+11	1.50778e+11	1.73485e+11	1.83893e+11	1.87386e+11	1.95021e+11
Sint Maarten (Dutch part)	Gross Domestic Product (GDP)						7.04637e+08	7.38436e+08	7.68603e+08	7.78045e+08	7.76257e+08	7.84693e+08	7.86816e+08	7.98883e+08	8.06073e+08
Slovakia	Gross Domestic Product (GDP)	3.82784e+10	3.95505e+10	4.14151e+10	4.36562e+10	4.59445e+10	4.89485e+10	5.29912e+10	5.86513e+10	6.18459e+10	5.85741e+10	6.14017e+10	6.30621e+10	6.40724e+10	6.49852e+10
Slovenia	Gross Domestic Product (GDP)	3.04617e+10	3.13602e+10	3.25632e+10	3.34887e+10	3.49461e+10	3.63449e+10	3.84006e+10	4.10661e+10	4.24215e+10	3.91137e+10	3.95916e+10	3.98343e+10	3.87827e+10	3.83956e+10
Solomon Islands	Gross Domestic Product (GDP)	3.69426e+08	3.39998e+08	3.30628e+08	3.52069e+08	3.80575e+08	4.29476e+08	4.46653e+08	5.20647e+08	5.39936e+08	5.41195e+08	5.98782e+08	6.3715e+08	6.53963e+08	6.73519e+08
Somalia	Gross Domestic Product (GDP)	1.97816e+09	2.0375e+09	2.10882e+09	2.18263e+09	2.2481e+09	2.31555e+09	2.37112e+09	2.43277e+09	2.49602e+09	2.56092e+09	2.6275e+09	2.69582e+09	2.76591e+09	2.83782e+09
South Africa	Gross Domestic Product (GDP)	2.13585e+11	2.19428e+11	2.27476e+11	2.34184e+11	2.44851e+11	2.57772e+11	2.72216e+11	2.86808e+11	2.9596e+11	2.91408e+11	3.00266e+11	3.09912e+11	3.16792e+11	3.238e+11
South Sudan	Gross Domestic Product (GDP)									9.85394e+09	1.03507e+10	1.09194e+10	1.04127e+10	5.61428e+09	6.35143e+09
Spain	Gross Domestic Product (GDP)	9.79526e+11	1.01872e+12	1.04805e+12	1.08146e+12	1.11571e+12	1.15725e+12	1.20555e+12	1.25099e+12	1.26495e+12	1.21974e+12	1.21991e+12	1.21238e+12	1.18705e+12	1.17245e+12
Sri Lanka	Gross Domestic Product (GDP)	2.00442e+10	1.97698e+10	2.05645e+10	2.17861e+10	2.29724e+10	2.44063e+10	2.62778e+10	2.80639e+10	2.97337e+10	3.07859e+10	3.32537e+10	3.59958e+10	3.83034e+10	4.1054e+10
St. Vincent and the Grenadines	Gross Domestic Product (GDP)	4.43018e+08	4.50593e+08	4.79076e+08	5.15915e+08	5.37358e+08	5.5073e+08	5.92922e+08	6.12481e+08	6.22581e+08	6.09461e+08	5.89026e+08	5.86167e+08	5.93041e+08	6.02762e+08
State of Palestine	Gross Domestic Product (GDP)	4.36763e+09	3.96097e+09	3.46628e+09	3.95211e+09	4.36088e+09	4831800000	4.64333e+09	4.94935e+09	5.25024e+09	5.70504e+09	6.1671e+09	6.93266e+09	7.36833e+09	7.51016e+09
Sudan	Gross Domestic Product (GDP)									3.06563e+10	3.3575e+10	3.59047e+10	3.54883e+10	3.44243e+10	3.55783e+10
Sudan (Former)	Gross Domestic Product (GDP)	2.43246e+10	2.6953e+10	2.85674e+10	3.06783e+10	3.22664e+10	3.51827e+10	3.74832e+10	3.96454e+10	4.05102e+10	4.3987e+10	4.69102e+10
Suriname	Gross Domestic Product (GDP)	1.71688e+09	1.78877e+09	1.83845e+09	1.95395e+09	2.11025e+09	2.19305e+09	2.31946e+09	2.43773e+09	2.53888e+09	2.61546e+09	2.75028e+09	2.89514e+09	2.98224e+09	3.06813e+09
Swaziland	Gross Domestic Product (GDP)	2.32823e+09	2.35518e+09	2.39703e+09	2.45074e+09	2.52196e+09	2.58408e+09	2.66944e+09	2.76297e+09	2.82856e+09	2.86391e+09	2.91736e+09	2.95526e+09	3.0293e+09	3.11371e+09
Sweden	Gross Domestic Product (GDP)	3.41717e+11	3.4706e+11	3.54256e+11	3.62708e+11	3.78379e+11	3.89043e+11	4.07282e+11	4.21149e+11	4.18803e+11	3.9709e+11	4.20871e+11	4.32085e+11	4.30848e+11	4.37303e+11
Switzerland	Gross Domestic Product (GDP)	3.78377e+11	3.83851e+11	3.84401e+11	3.84592e+11	3.95526e+11	4.07543e+11	4.23897e+11	4.41448e+11	4.51501e+11	4.41885e+11	4.54938e+11	4.63148e+11	4.68285e+11	4.77255e+11
Syrian Arab Republic	Gross Domestic Product (GDP)	2.22082e+10	2.30507e+10	2.48621e+10	2.5009e+10	2.67353e+10	2.8397e+10	2.98299e+10	3.15227e+10	3.29338e+10	3.4881e+10	3.60808e+10	3.4854e+10	2.80575e+10	2.22777e+10
Tajikistan	Gross Domestic Product (GDP)	1.4566e+09	1.59557e+09	1.76813e+09	1.96469e+09	2.16679e+09	2.31235e+09	2.46483e+09	2.65602e+09	2.85744e+09	2.97229e+09	3.16662e+09	3.24297e+09	3.48768e+09	3.74577e+09
TFYR of Macedonia	Gross Domestic Product (GDP)	5.67726e+09	5.50313e+09	5.58533e+09	5.70947e+09	5.97631e+09	6.2586e+09	6.58011e+09	7.00607e+09	7.38944e+09	7.36293e+09	7.61024e+09	7.78831e+09	7.7528e+09	7.96212e+09
Thailand	Gross Domestic Product (GDP)	1.4468e+11	1.49582e+11	1.59122e+11	1.70562e+11	1.81289e+11	1.88847e+11	1.9813e+11	2.08921e+11	2.12374e+11	2.10547e+11	2.26163e+11	2.27556e+11	2.43612e+11	2.50595e+11
Timor-Leste	Gross Domestic Product (GDP)	5.06923e+08	5.39241e+08	5.14997e+08	5.14564e+08	1.1875e+09	1812977173	2.88377e+09	2.86551e+09	3.21085e+09	2.99535e+09	2.95343e+09	3.18755e+09	2.85511e+09	3.00945e+09
Togo	Gross Domestic Product (GDP)	1.98919e+09	1.96386e+09	1.93885e+09	2.03285e+09	2.0844e+09	2.11022e+09	2.19254e+09	2.23822e+09	2.29096e+09	2.36775e+09	2.4624e+09	2.58256e+09	2.73297e+09	2.87341e+09
Tonga	Gross Domestic Product (GDP)	2.365e+08	2.43965e+08	2.52701e+08	2.58029e+08	2.59785e+08	2.63814e+08	2.60936e+08	2.49102e+08	2.5572e+08	2.61907e+08	2.71188e+08	2.78778e+08	2.80792e+08	2.72519e+08
Trinidad and Tobago	Gross Domestic Product (GDP)	1.08335e+10	1.12857e+10	1.21807e+10	1.39397e+10	1.50479e+10	1.59824e+10	1.81423e+10	1.89812e+10	1.94167e+10	1.92484e+10	1.87748e+10	1.8474e+10	1.87552e+10	1.92746e+10
Tunisia	Gross Domestic Product (GDP)	2.60399e+10	2.73027e+10	2.77669e+10	2.92858e+10	3.1031e+10	3.22722e+10	3.40969e+10	3.62291e+10	3.78449e+10	3.90266e+10	4.01815e+10	3.94114e+10	4.09678e+10	4.18923e+10
Turkey	Gross Domestic Product (GDP)	3.86584e+11	3.64559e+11	3.87029e+11	4.07408e+11	4.45552e+11	4.82986e+11	5.1628e+11	5.40383e+11	5.43944e+11	5.17694e+11	5.65099e+11	6.14673e+11	6.2775e+11	6.5364e+11
Turkmenistan	Gross Domestic Product (GDP)	1.10658e+10	1.15465e+10	1.15762e+10	1.19546e+10	1.25524e+10	1.41893e+10	1.57454e+10	1.74774e+10	2.00466e+10	2.12695e+10	2.32262e+10	2.65011e+10	2.94433e+10	3.24462e+10
Turks and Caicos Islands	Gross Domestic Product (GDP)	3.83563e+08	4.10584e+08	4.15358e+08	4.54144e+08	5.05924e+08	578646000	6.82177e+08	7.20647e+08	7.80258e+08	6.27716e+08	6.33899e+08	6.63188e+08	6.49073e+08	6.35635e+08
Tuvalu	Gross Domestic Product (GDP)	2.23001e+07	2.36263e+07	2.39105e+07	2.31312e+07	2.27823e+07	2.18971e+07	2.23082e+07	2.37248e+07	2.56187e+07	2.44824e+07	2.38126e+07	2.58257e+07	2.5873e+07	2.62093e+07
U.R. of Tanzania: Mainland	Gross Domestic Product (GDP)	1.28566e+10	1.36277e+10	1.46039e+10	1.56096e+10	1.68315e+10	1.8072e+10	1.92896e+10	2.06684e+10	2.20458e+10	2.28966e+10	2.42277e+10	2.65215e+10	2.78641e+10	3.01417e+10
Uganda	Gross Domestic Product (GDP)	8.54547e+09	9.29452e+09	9.95043e+09	1.05633e+10	1.11763e+10	1.22947e+10	1.31614e+10	1.42228e+10	1.57059e+10	1.6518e+10	1.81159e+10	1.8915e+10	1.95339e+10	2.04145e+10
Ukraine	Gross Domestic Product (GDP)	6.16827e+10	6.71307e+10	7.07152e+10	7.74449e+10	8.65798e+10	8.92389e+10	9.59955e+10	1.03882e+11	1.06213e+11	9.01361e+10	9.38244e+10	9.89334e+10	9.90841e+10	1.02234e+11
United Arab Emirates	Gross Domestic Product (GDP)	1.39151e+11	1.41065e+11	1.44498e+11	1.57214e+11	1.72254e+11	1.80617e+11	1.98385e+11	2.04703e+11	2.11236e+11	2.00161e+11	2.03435e+11	2.13373e+11	2.23355e+11	2.34969e+11
United Kingdom	Gross Domestic Product (GDP)	2.08747e+12	2.14309e+12	2.19565e+12	2.29007e+12	2.34627e+12	2.41212e+12	2.4855e+12	2.54902e+12	2.54055e+12	2.43104e+12	2.4775e+12	2.51826e+12	2.53486e+12	2.57869e+12
United States	Gross Domestic Product (GDP)	1.15533e+13	1.16661e+13	1.18744e+13	1.22077e+13	1.26699e+13	13093720000000	1.34429e+13	1.3682e+13	1.36421e+13	1.32634e+13	1.35993e+13	1.3817e+13	1.41378e+13	1.44515e+13
Uruguay	Gross Domestic Product (GDP)	1.72051e+10	1.65437e+10	1.52646e+10	1.53875e+10	1.61575e+10	1.73628e+10	1.80745e+10	1.92568e+10	2.06387e+10	2.1124e+10	2.28993e+10	2.45804e+10	2.5484e+10	2.66045e+10
USSR (Former)	Gross Domestic Product (GDP)
Uzbekistan	Gross Domestic Product (GDP)	1.09889e+10	1.14835e+10	1.19658e+10	1.24922e+10	1.34542e+10	1.43959e+10	1.54468e+10	1.69143e+10	1.84366e+10	1.99299e+10	2.1624e+10	2.34188e+10	2.53391e+10	2.71185e+10
Vanuatu	Gross Domestic Product (GDP)	3.76838e+08	3.63702e+08	3.47696e+08	3.60691e+08	3.75073e+08	3.94962e+08	4.28397e+08	4.50551e+08	4.79614e+08	4.95494e+08	5.03566e+08	5.09735e+08	5.1868e+08	5.35277e+08
Venezuela	Gross Domestic Product (GDP)	1.28279e+11	1.32633e+11	1.20887e+11	1.11512e+11	1.31904e+11	1.45513e+11	1.59879e+11	1.73874e+11	1.83051e+11	1.77189e+11	1.74551e+11	1.81841e+11	1.92071e+11	1.94651e+11
Viet Nam	Gross Domestic Product (GDP)	3.68461e+10	3.93866e+10	4.21752e+10	4.52713e+10	4.87979e+10	5.29173e+10	5.72718e+10	6.21148e+10	6.60348e+10	6.95499e+10	7.42681e+10	7.89027e+10	8.3043e+10	8.75455e+10
Yemen	Gross Domestic Product (GDP)	1.47073e+10	1.558e+10	1.63659e+10	1.73081e+10	1.81105e+10	1.90412e+10	1.99248e+10	2.06172e+10	2.14448e+10	2.23316e+10	2.36035e+10	2.05904e+10	2.10061e+10	2.20193e+10
Yemen Arab Republic (Former)	Gross Domestic Product (GDP)
Yemen Democratic (Former)	Gross Domestic Product (GDP)
Yugoslavia (Former)	Gross Domestic Product (GDP)
Zambia	Gross Domestic Product (GDP)	5.67908e+09	5.95241e+09	6.14987e+09	6.46521e+09	6.81456e+09	7.17856e+09	7.62544e+09	8.09772e+09	8.5578e+09	9.10576e+09	9.79963e+09	1.04695e+10	1.12356e+10	1.19659e+10
Zanzibar	Gross Domestic Product (GDP)	3.10783e+08	3.39662e+08	3.6873e+08	3.90519e+08	4.16009e+08	4.36201e+08	4.6235e+08	4.9308e+08	5.13748e+08	5.47702e+08	5.69713e+08	6.22792e+08	6.52787e+08	7.00565e+08
Zimbabwe	Gross Domestic Product (GDP)	7.74883e+09	7.73383e+09	7.2745e+09	6.73169e+09	6.48649e+09	6222940000	5.99742e+09	5.80147e+09	5.52639e+09	8.5954e+09	9.57321e+09	1.07129e+10	1.18448e+10	1.23759e+10
Afghanistan	Gross fixed capital formation (including Acquisitions less disposals of valuables)	6.67651e+08	7.01342e+08	9.61282e+08	1.08095e+09	1.32936e+09	1.4441e+09	1.44245e+09	1.52083e+09	1.5022e+09	1.57792e+09	1.37168e+09	1.39197e+09	1.28193e+09	1.2463e+09
Albania	Gross fixed capital formation (including Acquisitions less disposals of valuables)	1.69922e+09	2.11733e+09	2.21255e+09	2.60974e+09	2.68061e+09	2.81068e+09	3.17569e+09	3.34891e+09	3.48154e+09	3.51553e+09	3.2178e+09	3.40904e+09	3.02512e+09	2.9299e+09
Algeria	Gross fixed capital formation (including Acquisitions less disposals of valuables)	1.65629e+10	1.74573e+10	1.89237e+10	1.97375e+10	2.13559e+10	2.30858e+10	2.45171e+10	2.69933e+10	3.03405e+10	3.30105e+10	3.53212e+10	3.63455e+10	3.89624e+10	4.23131e+10
Andorra	Gross fixed capital formation (including Acquisitions less disposals of valuables)	5.76229e+08	6.13217e+08	6.62387e+08	7.70761e+08	8.59135e+08	9.70923e+08	1.05489e+09	1.05549e+09	9.07768e+08	7.27115e+08	6.51668e+08	5.76815e+08	5.22452e+08	4.89692e+08
Angola	Gross fixed capital formation (including Acquisitions less disposals of valuables)	3.27641e+09	3.00873e+09	3.07053e+09	3.19642e+09	2.55714e+09	2.73102e+09	4.53896e+09	6.74944e+09	8.64603e+09	9.50199e+09	9.82505e+09	1.02082e+10	1.07391e+10	1.04357e+10
Anguilla	Gross fixed capital formation (including Acquisitions less disposals of valuables)	6.98694e+07	5.49913e+07	3.96333e+07	4.48492e+07	6.66638e+07	8.02259e+07	1.09641e+08	1.62234e+08	1.76823e+08	7.47013e+07	5.78805e+07	4.37765e+07	4.48801e+07	4.67555e+07
Antigua and Barbuda	Gross fixed capital formation (including Acquisitions less disposals of valuables)	2.58588e+08	1.73684e+08	1.89363e+08	2.11157e+08	2.26285e+08	2.75248e+08	4.17266e+08	4.70783e+08	4.71532e+08	4.18278e+08	2.87736e+08	2.07562e+08	2.27663e+08	2.56288e+08
Argentina	Gross fixed capital formation (including Acquisitions less disposals of valuables)	3.77371e+10	3.18271e+10	2.02269e+10	2.79467e+10	3.47366e+10	4.07721e+10	4.77175e+10	5.43648e+10	5.86773e+10	5.01023e+10	6.0713e+10	7.17668e+10	6.80046e+10	7.00327e+10
Armenia	Gross fixed capital formation (including Acquisitions less disposals of valuables)	5.31638e+08	5.5984e+08	7.4537e+08	9.5007e+08	1.13084e+09	1.4601e+09	1.95271e+09	2.30748e+09	2.5821e+09	1.9275e+09	1.87157e+09	1.65299e+09	1.62116e+09	1.49326e+09
Aruba	Gross fixed capital formation (including Acquisitions less disposals of valuables)	5.15895e+08	5.06468e+08	5.62686e+08	6.13328e+08	6.39701e+08	7.4781e+08	7.90435e+08	8.11504e+08	8.26457e+08	8.42768e+08	7.0344e+08	6.26639e+08	6.36154e+08	5.69644e+08
Australia	Gross fixed capital formation (including Acquisitions less disposals of valuables)	1.38274e+11	1.50696e+11	1.69589e+11	1.84051e+11	1.95662e+11	2.13821e+11	2.24692e+11	2.46044e+11	2.51293e+11	2.56584e+11	2.66029e+11	2.95863e+11	3.03313e+11	2.98924e+11
Austria	Gross fixed capital formation (including Acquisitions less disposals of valuables)	7.251e+10	7.15855e+10	6.94886e+10	7.21256e+10	7.2799e+10	7.29687e+10	7.37908e+10	7.7182e+10	7.82794e+10	7.25419e+10	7.0789e+10	7.56337e+10	7.59984e+10	7.48684e+10
Azerbaijan	Gross fixed capital formation (including Acquisitions less disposals of valuables)	1.41959e+09	1.71204e+09	2.73924e+09	4.42386e+09	5.17156e+09	5.47153e+09	6.26493e+09	6.64087e+09	8.01554e+09	6.89335e+09	7.03121e+09	7.10158e+09	7.38567e+09	7.71804e+09
Bahamas	Gross fixed capital formation (including Acquisitions less disposals of valuables)	1.72715e+09	1.61183e+09	1.53855e+09	1.56512e+09	1.48437e+09	1863911853	2.29235e+09	2.23125e+09	2.01796e+09	1.8189e+09	1.82932e+09	1.94592e+09	2.10477e+09	2.04629e+09
Bahrain	Gross fixed capital formation (including Acquisitions less disposals of valuables)	2.28569e+09	2.06985e+09	2.81528e+09	3.24394e+09	3.13563e+09	4.10181e+09	5.0987e+09	7.02108e+09	8.3268e+09	5.8548e+09	6.71473e+09	4.35588e+09	5.55237e+09	4.79077e+09
Bangladesh	Gross fixed capital formation (including Acquisitions less disposals of valuables)	1.17042e+10	1.23796e+10	1.33901e+10	1.44434e+10	1.5767e+10	1.74546e+10	1.89013e+10	2.05018e+10	2.08718e+10	2.21628e+10	2.3921e+10	2.62105e+10	2.91475e+10	3.08473e+10
Barbados	Gross fixed capital formation (including Acquisitions less disposals of valuables)	6.47521e+08	6.55108e+08	6.26146e+08	6.6455e+08	7.01519e+08	717750000	7.65636e+08	7.6741e+08	7.66533e+08	5.97784e+08	5.41243e+08	5.94403e+08	5.70376e+08	5.63885e+08
Belarus	Gross fixed capital formation (including Acquisitions less disposals of valuables)	4.44556e+09	4.34455e+09	4.63337e+09	5.58957e+09	6.70446e+09	8.0107e+09	1.05421e+10	1.22757e+10	1.5197e+10	1.59609e+10	1.87602e+10	2.13609e+10	1.89531e+10	2.03798e+10
Belgium	Gross fixed capital formation (including Acquisitions less disposals of valuables)	7.59276e+10	7.7316e+10	7.44393e+10	7.46112e+10	8.07934e+10	8.60297e+10	8.90137e+10	9.46503e+10	9.73493e+10	9.02691e+10	9.01475e+10	9.37557e+10	9.37457e+10	9.17089e+10
Belize	Gross fixed capital formation (including Acquisitions less disposals of valuables)	2.64505e+08	2.47983e+08	2.34729e+08	2.01841e+08	1.90961e+08	2.06317e+08	2.09997e+08	2.16844e+08	2.77904e+08	2.25585e+08	1.77741e+08	1.76857e+08	1.93431e+08	2.26751e+08
Benin	Gross fixed capital formation (including Acquisitions less disposals of valuables)	6.33788e+08	6.81322e+08	7.32421e+08	7.98339e+08	8.11112e+08	8.43557e+08	8.85735e+08	9.38879e+08	1.01681e+09	1.04375e+09	9.8217e+08	1.03549e+09	1.08274e+09	1.56966e+09
Bermuda	Gross fixed capital formation (including Acquisitions less disposals of valuables)	8.34282e+08	7.91129e+08	6.68661e+08	6.12481e+08	8.67478e+08	954550901	9.46378e+08	7.44174e+08	7.3637e+08	7.75105e+08	6.60175e+08	6.08489e+08	5.14638e+08	5.23907e+08
Bhutan	Gross fixed capital formation (including Acquisitions less disposals of valuables)	3.05999e+08	3.78763e+08	4.42038e+08	4.3912e+08	5.06183e+08	4.37511e+08	4.30944e+08	3.64111e+08	4.96801e+08	5.99568e+08	8.75829e+08	9.79522e+08	1.01474e+09	6.63546e+08
Bolivia	Gross fixed capital formation (including Acquisitions less disposals of valuables)	1.41713e+09	1.11317e+09	1.31919e+09	1.17612e+09	1.16297e+09	1.24051e+09	1.35581e+09	1.52723e+09	1.81241e+09	1.86477e+09	2.00396e+09	2.47924e+09	2.51547e+09	2.83997e+09
Bosnia and Herzegovina	Gross fixed capital formation (including Acquisitions less disposals of valuables)	2.14867e+09	2.1289e+09	2.45863e+09	2.58027e+09	2.52174e+09	3.04504e+09	2.75001e+09	3.3743e+09	3.92288e+09	3.15618e+09	2.80526e+09	3.0109e+09	3.04452e+09	3.12986e+09
Botswana	Gross fixed capital formation (including Acquisitions less disposals of valuables)	1.94736e+09	2.0474e+09	2.13262e+09	2.24828e+09	2.47054e+09	2.51655e+09	2.69153e+09	2.99693e+09	3.09686e+09	3.39077e+09	3.70192e+09	4.15178e+09	4.7178e+09	4.52495e+09
Brazil	Gross fixed capital formation (including Acquisitions less disposals of valuables)	1.36908e+11	1.37505e+11	1.30311e+11	1.24325e+11	1.35665e+11	1.40584e+11	1.54324e+11	1.75698e+11	1.99546e+11	1.86128e+11	2.25836e+11	2.36485e+11	2.27056e+11	2.38812e+11
British Virgin Islands	Gross fixed capital formation (including Acquisitions less disposals of valuables)	1.99964e+08	2.08953e+08	2.01717e+08	1.76164e+08	1.8258e+08	209000000	2.11554e+08	2.12555e+08	2.10877e+08	2.19862e+08	2.22393e+08	2.18625e+08	2.08409e+08	2.07657e+08
Brunei Darussalam	Gross fixed capital formation (including Acquisitions less disposals of valuables)	8.45816e+08	9.22135e+08	1.32013e+09	1.04324e+09	1.07403e+09	1.08224e+09	1.10043e+09	1.39065e+09	1.57495e+09	1.56801e+09	1.51225e+09	1.54404e+09	1.58983e+09	1.6783e+09
Bulgaria	Gross fixed capital formation (including Acquisitions less disposals of valuables)	3.60616e+09	4.32813e+09	4.67858e+09	5.27936e+09	6.00459e+09	7.61176e+09	8.60174e+09	9.72952e+09	1.18681e+10	9.80133e+09	8.00593e+09	7.63682e+09	7.78624e+09	7.78009e+09
Burkina Faso	Gross fixed capital formation (including Acquisitions less disposals of valuables)	7.35854e+08	7.12502e+08	7.2528e+08	8.33618e+08	9.26781e+08	1.07549e+09	1.09849e+09	1.1971e+09	1.30051e+09	1.50074e+09	1.7717e+09	2.19703e+09	2.33347e+09	2.49915e+09
Burundi	Gross fixed capital formation (including Acquisitions less disposals of valuables)	8.67279e+07	1.00925e+08	1.05951e+08	1.94431e+08	2.50253e+08	2.05256e+08	2.04308e+08	2.04132e+08	2.06468e+08	2.85093e+08	3.637e+08	4.44733e+08	4.99479e+08	6.36836e+08
Cabo Verde	Gross fixed capital formation (including Acquisitions less disposals of valuables)	2.47976e+08	2.7e+08	3.25928e+08	3.24391e+08	4.03702e+08	3.76875e+08	4.45883e+08	6.11067e+08	6.26287e+08	5.72883e+08	6.8149e+08	7.19378e+08	5.51951e+08	5.57844e+08
Cambodia	Gross fixed capital formation (including Acquisitions less disposals of valuables)	6.84024e+08	6.55115e+08	8.35084e+08	8.95987e+08	9.94591e+08	1.18857e+09	1.38689e+09	1.52721e+09	1.7704e+09	1.84157e+09	1.66035e+09	1.83911e+09	2.15872e+09	2.31016e+09
Cameroon	Gross fixed capital formation (including Acquisitions less disposals of valuables)	2.14142e+09	2.68413e+09	2.79098e+09	2.62681e+09	2.91831e+09	2.93266e+09	2.93978e+09	3.28257e+09	3.43421e+09	3.55367e+09	3.9349e+09	4.41213e+09	4.47344e+09	4.7052e+09
Canada	Gross fixed capital formation (including Acquisitions less disposals of valuables)	1.9306e+11	2.01833e+11	2.03869e+11	2.14805e+11	2.33424e+11	2.56317e+11	2.74468e+11	2.84216e+11	2.8886e+11	2.56088e+11	2.85487e+11	2.99406e+11	3.1348e+11	3.14428e+11
Cayman Islands	Gross fixed capital formation (including Acquisitions less disposals of valuables)	6.07599e+08	6.11972e+08	6.22787e+08	6.34842e+08	6.40277e+08	6.82013e+08	7.13564e+08	7.36106e+08	7.33385e+08	6.80563e+08	6.62119e+08	6.67884e+08	6.77129e+08	6.86504e+08
Central African Republic	Gross fixed capital formation (including Acquisitions less disposals of valuables)	1.806e+08	1.68072e+08	1.57008e+08	9.71387e+07	1.06153e+08	1.55846e+08	1.53887e+08	1.61126e+08	1.61354e+08	1.51028e+08	1.66508e+08	1.58466e+08	1.75279e+08	6.18873e+07
Chad	Gross fixed capital formation (including Acquisitions less disposals of valuables)	2.68405e+08	7.43772e+08	1.37697e+09	1.21953e+09	1.12649e+09	1.18981e+09	9.85439e+08	9.68271e+08	9.22696e+08	1.0205e+09	1.26338e+09	1.28865e+09	1.50643e+09	1.66762e+09
Chile	Gross fixed capital formation (including Acquisitions less disposals of valuables)	1.72066e+10	1.79509e+10	1.8228e+10	1.92654e+10	2.1467e+10	2.65097e+10	2.76384e+10	3.06221e+10	3.60995e+10	3.17335e+10	3.56069e+10	4.07499e+10	4.5711e+10	4.58899e+10
China	Gross fixed capital formation (including Acquisitions less disposals of valuables)	5.04347e+11	5.49809e+11	6.20883e+11	7.23272e+11	8.08997e+11	9.05907e+11	1.01967e+12	1.15636e+12	1.26718e+12	1.5539e+12	1.73241e+12	1.88979e+12	2.06143e+12	2.25031e+12
China: Hong Kong SAR	Gross fixed capital formation (including Acquisitions less disposals of valuables)	3.60444e+10	3.70366e+10	3.55956e+10	3.61347e+10	3.73475e+10	3.88503e+10	4.15962e+10	4.29112e+10	4.35074e+10	4.19989e+10	4.52291e+10	4.98562e+10	5.32373e+10	5.49869e+10
China: Macao SAR	Gross fixed capital formation (including Acquisitions less disposals of valuables)	8.67915e+08	8.35802e+08	9.11283e+08	1.354e+09	1.86861e+09	3.03892e+09	4.31716e+09	5.35156e+09	4.55945e+09	3.08554e+09	2.5665e+09	3.00109e+09	3.59744e+09	3.76496e+09
Colombia	Gross fixed capital formation (including Acquisitions less disposals of valuables)	1.68551e+10	1.84938e+10	2.05499e+10	2.29103e+10	2.54602e+10	2.88233e+10	3.40317e+10	3.89438e+10	4.27825e+10	4.22327e+10	4.42854e+10	5.26867e+10	5.51224e+10	5.82416e+10
Comoros	Gross fixed capital formation (including Acquisitions less disposals of valuables)	3.40649e+07	3.50601e+07	3.99919e+07	3.83569e+07	3.47491e+07	3.60287e+07	3.6122e+07	4.07916e+07	6.39205e+07	7.01847e+07	5.87446e+07	6.22693e+07	6.66281e+07	7.12921e+07
Congo	Gross fixed capital formation (including Acquisitions less disposals of valuables)	9.93016e+08	1.0527e+09	9.12202e+08	9.69247e+08	1.07858e+09	1.46983e+09	1.94378e+09	2.35049e+09	2.46156e+09	2.58924e+09	3.47113e+09	3.93239e+09	5.02969e+09	5.44985e+09
Cook Islands	Gross fixed capital formation (including Acquisitions less disposals of valuables)	2.22586e+07	2.08169e+07	2.27459e+07	2.61274e+07	2.79579e+07	2.38616e+07	2.75064e+07	2.55679e+07	2.83034e+07	2.13469e+07	2.19542e+07	2.37025e+07	2.32425e+07	2.44699e+07
Costa Rica	Gross fixed capital formation (including Acquisitions less disposals of valuables)	3.07789e+09	3.15738e+09	3.36445e+09	3.60639e+09	3.58791e+09	3.74057e+09	4.14382e+09	4.89218e+09	5.43263e+09	4.8282e+09	5.09556e+09	5.54931e+09	5.98111e+09	6.68827e+09
Côte d'Ivoire	Gross fixed capital formation (including Acquisitions less disposals of valuables)	1.91222e+09	1.71144e+09	1.77818e+09	1.5968e+09	1.65907e+09	1.56616e+09	1.48942e+09	1.55645e+09	1.77435e+09	1.87371e+09	1.91868e+09	1.65967e+09	3.18988e+09	5.30475e+09
Croatia	Gross fixed capital formation (including Acquisitions less disposals of valuables)	7.05464e+09	7.47735e+09	8.53085e+09	1.05344e+10	1.11072e+10	1.15395e+10	1.27071e+10	1.36216e+10	1.48715e+10	1.27358e+10	1.08011e+10	1.05129e+10	1.01704e+10	1.00662e+10
Cuba	Gross fixed capital formation (including Acquisitions less disposals of valuables)	3.57798e+09	3.47645e+09	3.16601e+09	2.95569e+09	3.16939e+09	3821500000	5.50717e+09	5.64012e+09	6.06949e+09	5.86594e+09	5.82327e+09	6.23844e+09	6.31798e+09	6.47313e+09
Curaçao	Gross fixed capital formation (including Acquisitions less disposals of valuables)	6.85468e+08	7.05623e+08	7.39171e+08	7.2327e+08	7.30154e+08	8.06865e+08	8.90727e+08	9.89632e+08	1.06197e+09	9.89617e+08	1.07344e+09	1.09192e+09	1.11139e+09	1.13845e+09
Cyprus	Gross fixed capital formation (including Acquisitions less disposals of valuables)	3.11908e+09	3.13224e+09	3.54343e+09	3.58882e+09	3.73881e+09	3.99275e+09	4.8342e+09	5.21192e+09	5.67999e+09	4.89018e+09	4.63858e+09	4.20074e+09	3.33298e+09	2.76254e+09
Czech Republic	Gross fixed capital formation (including Acquisitions less disposals of valuables)	3.17859e+10	3.356e+10	3.42867e+10	3.48982e+10	3.62719e+10	3.85981e+10	4.08654e+10	4.63987e+10	4.75767e+10	4.27763e+10	4.33396e+10	4.38047e+10	4.25198e+10	4.06471e+10
Czechoslovakia (Former)	Gross fixed capital formation (including Acquisitions less disposals of valuables)
D.R. of the Congo	Gross fixed capital formation (including Acquisitions less disposals of valuables)	7.81164e+08	8.37926e+08	1.23779e+09	1.27831e+09	1.19665e+09	1.3969e+09	1.66404e+09	1.86872e+09	1.98836e+09	3.30507e+09	3.99234e+09	4.46838e+09	4.91446e+09	5.26452e+09
Denmark	Gross fixed capital formation (including Acquisitions less disposals of valuables)	5.20643e+10	5.18211e+10	5.14392e+10	5.14206e+10	5.35682e+10	5.61246e+10	6.46e+10	6.50251e+10	6.28763e+10	5.39085e+10	5.1762e+10	5.28489e+10	5.31053e+10	5.34122e+10
Djibouti	Gross fixed capital formation (including Acquisitions less disposals of valuables)	3.90851e+07	3.53058e+07	4.618e+07	8.94506e+07	1.03584e+08	1.17257e+08	1.99688e+08	2.52206e+08	2.93568e+08	2.48946e+08	1.83473e+08	2.191e+08	2.68453e+08	2.94657e+08
Dominica	Gross fixed capital formation (including Acquisitions less disposals of valuables)	6.09767e+07	4.9936e+07	2.37945e+07	3.23246e+07	7.01899e+07	7.31852e+07	7.73682e+07	8.31217e+07	9.65241e+07	8.77068e+07	9.64635e+07	9.74827e+07	9.29837e+07	5.32722e+07
Dominican Republic	Gross fixed capital formation (including Acquisitions less disposals of valuables)	6.11211e+09	5.86618e+09	6.16199e+09	4.91761e+09	4.82815e+09	5.47132e+09	6.63837e+09	7.46747e+09	8.15468e+09	6.94479e+09	8.16884e+09	7.95143e+09	8.29346e+09	8.05688e+09
Ecuador	Gross fixed capital formation (including Acquisitions less disposals of valuables)	5.10038e+09	6.13353e+09	7.24322e+09	7.2705e+09	7.65439e+09	8476800000	8.8992e+09	9.23038e+09	1.07049e+10	1.0319e+10	1.13705e+10	1.30004e+10	1.4373e+10	1.59104e+10
Egypt	Gross fixed capital formation (including Acquisitions less disposals of valuables)	1.3531e+10	1.32349e+10	1.39638e+10	1.31364e+10	1.40052e+10	1.59968e+10	1.82025e+10	2.25283e+10	2.64184e+10	2.37218e+10	2.55591e+10	2.41218e+10	2.42996e+10	2.2394e+10
El Salvador	Gross fixed capital formation (including Acquisitions less disposals of valuables)	2.51072e+09	2.54868e+09	2.63202e+09	2.69767e+09	2.56214e+09	2610925420	2.93452e+09	3.15949e+09	2.98747e+09	2.41306e+09	2.47069e+09	2.81139e+09	2.77143e+09	3.04001e+09
Equatorial Guinea	Gross fixed capital formation (including Acquisitions less disposals of valuables)	8.82596e+08	1.40077e+09	1.1396e+09	1.41361e+09	1.42099e+09	1.56289e+09	1.66256e+09	1.95962e+09	2.40403e+09	3.00456e+09	2.91141e+09	2.71635e+09	3.00157e+09	3.07114e+09
Eritrea	Gross fixed capital formation (including Acquisitions less disposals of valuables)	2.19556e+08	3.81975e+08	3.175e+08	3.06868e+08	2.52025e+08	2.23413e+08	1.33966e+08	1.17744e+08	1.11089e+08	9.66182e+07	1.03821e+08	1.18923e+08	1.21356e+08	1.18623e+08
Estonia	Gross fixed capital formation (including Acquisitions less disposals of valuables)	2.31588e+09	2.59713e+09	3.21677e+09	3.78846e+09	3.99711e+09	4.60968e+09	5.66221e+09	6.24605e+09	5.42781e+09	3.43602e+09	3.34592e+09	4.44907e+09	4.91314e+09	5.03353e+09
Ethiopia	Gross fixed capital formation (including Acquisitions less disposals of valuables)	2.08767e+09	2.29893e+09	2.29491e+09	2.09111e+09	3.06089e+09	3.16266e+09	3.83315e+09	3.98568e+09	4.34876e+09	5.66171e+09	6.6572e+09	8.21822e+09	1.16301e+10	1.28929e+10
Ethiopia (Former)	Gross fixed capital formation (including Acquisitions less disposals of valuables)
Fiji	Gross fixed capital formation (including Acquisitions less disposals of valuables)	4.81569e+08	4.88895e+08	4.98881e+08	4.84478e+08	4.56076e+08	5.43476e+08	5.39929e+08	4.66638e+08	5.86841e+08	4.13628e+08	3.88689e+08	5.22289e+08	4.53302e+08	4.83398e+08
Finland	Gross fixed capital formation (including Acquisitions less disposals of valuables)	4.28844e+10	4.36287e+10	4.23364e+10	4.35185e+10	4.55407e+10	4.70266e+10	4.76255e+10	5.2366e+10	5.25074e+10	4.59265e+10	4.6425e+10	4.83253e+10	4.7113e+10	4.48414e+10
France	Gross fixed capital formation (including Acquisitions less disposals of valuables)	4.36353e+11	4.4628e+11	4.42185e+11	4.50672e+11	4.66355e+11	4.79876e+11	4.9737e+11	5.24898e+11	5.29376e+11	4.81363e+11	4.91381e+11	5.01533e+11	5.0286e+11	4.97884e+11
French Polynesia	Gross fixed capital formation (including Acquisitions less disposals of valuables)	1.06707e+09	1.13677e+09	1.36493e+09	1.32633e+09	1.38026e+09	1.37003e+09	1.25359e+09	1.33321e+09	1.39272e+09	1.18424e+09	1.14422e+09	1.1692e+09	1.17466e+09	1.16383e+09
Gabon	Gross fixed capital formation (including Acquisitions less disposals of valuables)	1.8418e+09	2.03943e+09	2.41219e+09	2.07735e+09	1.97617e+09	2.00981e+09	2.149e+09	2.35997e+09	2.60402e+09	2.47834e+09	2.83854e+09	2.98631e+09	3.38232e+09	3.85041e+09
Gambia	Gross fixed capital formation (including Acquisitions less disposals of valuables)	1.02478e+08	1.49164e+08	1.25248e+08	2.73982e+08	1.88024e+08	1.83878e+08	1.99381e+08	1.99932e+08	1.86902e+08	2.01896e+08	1.418e+08	1.89272e+08	1.82765e+08	1.78585e+08
Georgia	Gross fixed capital formation (including Acquisitions less disposals of valuables)	1.14545e+09	1.28481e+09	1.21829e+09	1.47352e+09	1.60608e+09	1.79925e+09	1.79215e+09	2.026e+09	1.73181e+09	1.18813e+09	1.59266e+09	1.98604e+09	2.3283e+09	2.12569e+09
Germany	Gross fixed capital formation (including Acquisitions less disposals of valuables)	5.99982e+11	5.85508e+11	5.51881e+11	5.44024e+11	5.43998e+11	5.45569e+11	5.84204e+11	6.09791e+11	6.17221e+11	5.57206e+11	5.84729e+11	6.27237e+11	6.23052e+11	6.18462e+11
Ghana	Gross fixed capital formation (including Acquisitions less disposals of valuables)	3.19281e+09	3.13074e+09	1.88074e+09	2.6856e+09	3.40895e+09	3.548e+09	3.94873e+09	4.67322e+09	6.07836e+09	4.77988e+09	5.94612e+09	8.18479e+09	9.89882e+09	9.95112e+09
Greece	Gross fixed capital formation (including Acquisitions less disposals of valuables)	4.79821e+10	4.86631e+10	4.81434e+10	5.56829e+10	5.87274e+10	5.11578e+10	6.00444e+10	7.07189e+10	6.60256e+10	5.73107e+10	4.5317e+10	3.76858e+10	2.68837e+10	2.5649e+10
Greenland	Gross fixed capital formation (including Acquisitions less disposals of valuables)	3.71463e+08	3.57896e+08	3.03466e+08	3.1016e+08	2.93484e+08	4.09044e+08	3.93369e+08	5.37777e+08	7.36879e+08	5.74963e+08	1.00402e+09	1.32502e+09	7.8307e+08	1.02219e+09
Grenada	Gross fixed capital formation (including Acquisitions less disposals of valuables)	2.11106e+08	1.65518e+08	1.56122e+08	2.11979e+08	2.1576e+08	3.21885e+08	2.37811e+08	2.50888e+08	2.22107e+08	1.59796e+08	1.46274e+08	1.33316e+08	1.07225e+08	1.23869e+08
Guatemala	Gross fixed capital formation (including Acquisitions less disposals of valuables)	4.48246e+09	4.56485e+09	4.98725e+09	4.83199e+09	4.77497e+09	4.98005e+09	5.76215e+09	6.04775e+09	5.6956e+09	4.9476e+09	4.84542e+09	5.18951e+09	5.37626e+09	5.47523e+09
Guinea	Gross fixed capital formation (including Acquisitions less disposals of valuables)	4.05471e+08	3.89657e+08	5.04217e+08	5.53126e+08	6.57666e+08	8.10903e+08	8.57274e+08	8.44957e+08	1.05616e+09	8.9984e+08	1.00152e+09	1.33703e+09	1.39452e+09	1.42241e+09
Guinea-Bissau	Gross fixed capital formation (including Acquisitions less disposals of valuables)	4.91931e+07	5.49697e+07	4.49453e+07	4.95537e+07	3.90033e+07	3.55434e+07	4.15305e+07	5.06059e+07	4.5252e+07	4.6126e+07	5.27482e+07	5.75821e+07	4.98366e+07	2.85117e+07
Guyana	Gross fixed capital formation (including Acquisitions less disposals of valuables)	3.06642e+08	3.13569e+08	3.12988e+08	2.85369e+08	2.69512e+08	2.66716e+08	3.92276e+08	3.64989e+08	3.61407e+08	4.1536e+08	4.13373e+08	4.09707e+08	4.48073e+08	3.52094e+08
Haiti	Gross fixed capital formation (including Acquisitions less disposals of valuables)	5.31667e+08	5.25044e+08	5.38412e+08	5.55092e+08	5.37309e+08	5.45035e+08	5.56932e+08	5.73979e+08	5.90046e+08	6.11018e+08	5.71159e+08	6.25858e+08	6.64369e+08	7.04597e+08
Honduras	Gross fixed capital formation (including Acquisitions less disposals of valuables)	2.09342e+09	2.03042e+09	1.88253e+09	1.99902e+09	2.46624e+09	2.4309e+09	2.75549e+09	3.42701e+09	3.64148e+09	2.3529e+09	2.38576e+09	2.78852e+09	2.90683e+09	2.88196e+09
Hungary	Gross fixed capital formation (including Acquisitions less disposals of valuables)	2.14762e+10	2.20312e+10	2.37555e+10	2.40381e+10	2.58308e+10	2.67329e+10	2.69568e+10	2.81174e+10	2.84146e+10	2.60727e+10	2.35911e+10	2.30728e+10	2.21038e+10	2.32475e+10
Iceland	Gross fixed capital formation (including Acquisitions less disposals of valuables)	3.22294e+09	3.12147e+09	2.72401e+09	2.98821e+09	3.77987e+09	4.98389e+09	6.14435e+09	5.45403e+09	4.42283e+09	2.31384e+09	2.11598e+09	2.36222e+09	2.46416e+09	2.40897e+09
India	Gross fixed capital formation (including Acquisitions less disposals of valuables)	1.45149e+11	1.55327e+11	1.65463e+11	1.89938e+11	2.28181e+11	2.63421e+11	2.99803e+11	3.46944e+11	3.6171e+11	3.96466e+11	4.56037e+11	4.97661e+11	5.12485e+11	4.98548e+11
Indonesia	Gross fixed capital formation (including Acquisitions less disposals of valuables)	4.73806e+10	5.04567e+10	5.28254e+10	5.31425e+10	6.09456e+10	6.75808e+10	6.93358e+10	7.58006e+10	8.48103e+10	8.76035e+10	9.50334e+10	1.02961e+11	1.12936e+11	1.18255e+11
Iran (Islamic Republic of)	Gross fixed capital formation (including Acquisitions less disposals of valuables)	3.06126e+10	3.49482e+10	3.97718e+10	4.46747e+10	4.87773e+10	5.30024e+10	5.45716e+10	5.81636e+10	6.44909e+10	6.39164e+10	6.83268e+10	6.90064e+10	5.25845e+10	4.89791e+10
Iraq	Gross fixed capital formation (including Acquisitions less disposals of valuables)	1.28043e+09	2.68528e+09	2.17079e+09	3.45344e+09	2.60856e+09	6917365625	8.39723e+09	3.24532e+09	7.72808e+09	5.56085e+09	9.23637e+09	8.13994e+09	1.14504e+10	1.21991e+10
Ireland	Gross fixed capital formation (including Acquisitions less disposals of valuables)	4.11937e+10	4.34168e+10	4.5795e+10	4.81094e+10	5.31396e+10	6.08566e+10	6.32913e+10	6.50013e+10	5.87436e+10	4.67007e+10	3.82852e+10	3.71722e+10	3.9017e+10	3.80779e+10
Israel	Gross fixed capital formation (including Acquisitions less disposals of valuables)	2.81792e+10	2.72538e+10	2.54235e+10	2.42886e+10	2.42759e+10	2.50513e+10	2.79909e+10	3.06308e+10	3.35099e+10	3.20161e+10	3.50811e+10	4.05825e+10	4.20158e+10	4.25944e+10
Italy	Gross fixed capital formation (including Acquisitions less disposals of valuables)	3.56471e+11	3.65548e+11	3.8093e+11	3.79885e+11	3.88057e+11	3.94204e+11	4.06753e+11	4.13106e+11	4.00078e+11	3.60014e+11	3.58391e+11	3.51306e+11	3.25356e+11	3.07713e+11
Jamaica	Gross fixed capital formation (including Acquisitions less disposals of valuables)	2.41355e+09	2.71125e+09	2.88181e+09	2.8676e+09	2.93754e+09	3.00608e+09	3.24566e+09	3.06514e+09	2.82315e+09	2.31693e+09	2.25726e+09	2.44119e+09	2.32026e+09	2.44816e+09
Japan	Gross fixed capital formation (including Acquisitions less disposals of valuables)	1.0817e+12	1.05895e+12	1.00704e+12	1.00882e+12	1.01281e+12	1.02137e+12	1.03678e+12	1.04004e+12	9.97325e+11	8.91699e+11	8.89538e+11	9.01839e+11	9.3275e+11	9.56909e+11
Jordan	Gross fixed capital formation (including Acquisitions less disposals of valuables)	2.17668e+09	2.09396e+09	2.14511e+09	2.34023e+09	2.93378e+09	3.85577e+09	3.49219e+09	4.05765e+09	4.85389e+09	4.77488e+09	4.14045e+09	4.27199e+09	4.75205e+09	4.62642e+09
Kazakhstan	Gross fixed capital formation (including Acquisitions less disposals of valuables)	6.83999e+09	8.5671e+09	9.42438e+09	1.01753e+10	1.24659e+10	1.59744e+10	2.00802e+10	2.3658e+10	2.35273e+10	2.30826e+10	2.39348e+10	2.47885e+10	2.70339e+10	2.94522e+10
Kenya	Gross fixed capital formation (including Acquisitions less disposals of valuables)	3.07287e+09	3.45335e+09	3.24402e+09	2.98416e+09	3.20304e+09	4.09346e+09	4.8524e+09	4.95905e+09	5.59647e+09	6.15437e+09	7.02098e+09	7.33993e+09	8.26892e+09	8.38668e+09
Kiribati	Gross fixed capital formation (including Acquisitions less disposals of valuables)	4.65356e+07	4.49838e+07	4.82228e+07	4.65695e+07	4.66497e+07	5.55367e+07	4.8447e+07	4.86511e+07	4.92827e+07	4.94514e+07	4.66976e+07	4.84964e+07	5.47985e+07	5.25779e+07
Kosovo	Gross fixed capital formation (including Acquisitions less disposals of valuables)	9.9104e+08	1.15339e+09	1.01133e+09	8.86186e+08	7.20671e+08	7.37203e+08	7.72397e+08	8.14361e+08	9.68415e+08	1.10017e+09	1.23982e+09	1.38931e+09	1.2166e+09	1.36916e+09
Kuwait	Gross fixed capital formation (including Acquisitions less disposals of valuables)	4.88802e+09	5.63754e+09	7.06003e+09	8.67594e+09	9.34486e+09	1.18151e+10	1.59737e+10	1.8888e+10	2.30648e+10	1.78e+10	1.82023e+10	1.88226e+10	1.94342e+10	2.36356e+10
Kyrgyzstan	Gross fixed capital formation (including Acquisitions less disposals of valuables)	3.9473e+08	3.87292e+08	3.59115e+08	3.36537e+08	3.61595e+08	3.98844e+08	5.97686e+08	6.60656e+08	7.49455e+08	8.10141e+08	7.51709e+08	7.18507e+08	9.8043e+08	1.00582e+09
Lao People's DR	Gross fixed capital formation (including Acquisitions less disposals of valuables)	4.69629e+08	5.03742e+08	6.63905e+08	6.72821e+08	8.32867e+08	9.31679e+08	1.18678e+09	1.60859e+09	1.63485e+09	1.65653e+09	1.44387e+09	1.69669e+09	2.21105e+09	2.06036e+09
Latvia	Gross fixed capital formation (including Acquisitions less disposals of valuables)	2.69378e+09	3.23016e+09	3.11792e+09	3.4418e+09	4.43693e+09	5.3486e+09	6.15545e+09	7.53775e+09	6.84198e+09	4.56373e+09	3.65281e+09	4.53569e+09	5.19493e+09	4.92308e+09
Lebanon	Gross fixed capital formation (including Acquisitions less disposals of valuables)	3.72273e+09	3.93576e+09	4.02645e+09	4.25739e+09	4.73792e+09	4.7728e+09	4.77647e+09	5.74144e+09	6.96401e+09	8.95512e+09	8.96859e+09	8.41543e+09	8.5629e+09	9.54255e+09
Lesotho	Gross fixed capital formation (including Acquisitions less disposals of valuables)	4.89391e+08	4.58841e+08	3.95515e+08	3.86252e+08	3.46314e+08	2.88956e+08	3.1126e+08	3.47259e+08	4.87764e+08	4.45024e+08	4.76602e+08	4.88233e+08	5.89703e+08	5.91665e+08
Liberia	Gross fixed capital formation (including Acquisitions less disposals of valuables)	40580788	23426399	77759248	30416411	34999943	80864000	168371553	206595294	302032158	185712785	289691128	292452726	319246682	348420150
Libya	Gross fixed capital formation (including Acquisitions less disposals of valuables)	9.47489e+09	9.14244e+09	1.07023e+10	9.88184e+09	1.07514e+10	1.26437e+10	1.27701e+10	1.36385e+10	1.41295e+10	1.38752e+10	1.45134e+10	5.63149e+09	1.14915e+10	9.63582e+09
Liechtenstein	Gross fixed capital formation (including Acquisitions less disposals of valuables)	8.57255e+08	8.22007e+08	8.14246e+08	7.8979e+08	8.31524e+08	8.94707e+08	9.57266e+08	1.05453e+09	1.01047e+09	8.5448e+08	9.3047e+08	9.14166e+08	9.41093e+08	9.57377e+08
Lithuania	Gross fixed capital formation (including Acquisitions less disposals of valuables)	3.35795e+09	3.79946e+09	4.20464e+09	4.77067e+09	5.51957e+09	6.12554e+09	7.33151e+09	8.97665e+09	8.60297e+09	5.27199e+09	5.34425e+09	6.38272e+09	6.28265e+09	6.71989e+09
Luxembourg	Gross fixed capital formation (including Acquisitions less disposals of valuables)	6.64304e+09	6.56743e+09	6.20517e+09	6.8348e+09	7.12008e+09	7.61565e+09	7.1942e+09	7.67671e+09	8.46889e+09	7.18736e+09	7.39007e+09	8.58815e+09	8.69485e+09	8.35572e+09
Madagascar	Gross fixed capital formation (including Acquisitions less disposals of valuables)	7.76355e+08	9.52371e+08	5.95076e+08	8.85912e+08	1.13332e+09	1.11847e+09	1.33474e+09	1.61242e+09	2.46444e+09	1.99909e+09	1.75376e+09	1.77577e+09	1.87909e+09	2.00875e+09
Malawi	Gross fixed capital formation (including Acquisitions less disposals of valuables)	3.05254e+08	3.10241e+08	2.54026e+08	2.95217e+08	3.75146e+08	5.2111e+08	7.81493e+08	9.05862e+08	1.10677e+09	7.46921e+08	4.58139e+08	2.57072e+08	3.17464e+08	3.94426e+08
Malaysia	Gross fixed capital formation (including Acquisitions less disposals of valuables)	2.90704e+10	2.84709e+10	2.86354e+10	2.94497e+10	3.04962e+10	3.20132e+10	3.40187e+10	3.75428e+10	3.84266e+10	3.73859e+10	4.18255e+10	4.44354e+10	5.32644e+10	5.76247e+10
Maldives	Gross fixed capital formation (including Acquisitions less disposals of valuables)	1.52603e+08	1.65645e+08	1.63117e+08	2.25817e+08	2.99697e+08	3.75947e+08	4.17326e+08	5.11427e+08	5.97806e+08	3.77992e+08	3.97022e+08	4.94549e+08	3.90571e+08	2.78355e+08
Mali	Gross fixed capital formation (including Acquisitions less disposals of valuables)	5.98468e+08	6.87095e+08	6.89476e+08	7.37602e+08	7.95693e+08	8.46881e+08	8.80611e+08	1.01437e+09	1.00623e+09	1.14722e+09	1.22655e+09	1.29557e+09	8.96851e+08	1.11187e+09
Malta	Gross fixed capital formation (including Acquisitions less disposals of valuables)	1.19504e+09	1.09421e+09	9.0839e+08	1.2132e+09	1.21937e+09	1.41586e+09	1.45263e+09	1.53442e+09	1.39396e+09	1.22895e+09	1.55391e+09	1.2885e+09	1.2787e+09	1.30699e+09
Marshall Islands	Gross fixed capital formation (including Acquisitions less disposals of valuables)	6.53168e+07	6.78583e+07	7.03656e+07	7.26335e+07	7.75562e+07	79147451	7.98413e+07	8.08557e+07	8.20408e+07	8.0555e+07	8.52756e+07	8.57821e+07	8.85272e+07	8.92567e+07
Mauritania	Gross fixed capital formation (including Acquisitions less disposals of valuables)	2.50593e+08	2.83943e+08	2.79376e+08	4.17356e+08	8.46526e+08	1.2879e+09	9.09705e+08	9.11885e+08	9.64677e+08	8.34845e+08	1.2358e+09	1.76337e+09	2.4355e+09	2.48909e+09
Mauritius	Gross fixed capital formation (including Acquisitions less disposals of valuables)	1.19854e+09	1.2532e+09	1.25324e+09	1.42169e+09	1.43389e+09	1.39377e+09	1.63771e+09	1.73516e+09	1.75857e+09	1.91595e+09	1.90287e+09	1.93024e+09	1.91462e+09	1.8468e+09
Mexico	Gross fixed capital formation (including Acquisitions less disposals of valuables)	1.72089e+11	1.62387e+11	1.6135e+11	1.61946e+11	1.74126e+11	1.84407e+11	2.00429e+11	2.12437e+11	2.2296e+11	2.02297e+11	2.04874e+11	2.21077e+11	2.31164e+11	2.27051e+11
Micronesia (FS of)	Gross fixed capital formation (including Acquisitions less disposals of valuables)	7.35398e+07	7.60733e+07	7.46971e+07	7.74727e+07	7.76409e+07	7.7775e+07	7.77037e+07	7.36161e+07	7.55424e+07	7.75131e+07	7.69705e+07	7.82168e+07	7.58424e+07	7.92942e+07
Monaco	Gross fixed capital formation (including Acquisitions less disposals of valuables)	8.31911e+08	8.48326e+08	8.35409e+08	8.44769e+08	8.82254e+08	9.15268e+08	9.98229e+08	1.17975e+09	1.20777e+09	9.95198e+08	1.0187e+09	1.1034e+09	1.11642e+09	1.19964e+09
Mongolia	Gross fixed capital formation (including Acquisitions less disposals of valuables)	6.86389e+08	5.71517e+08	5.50708e+08	6.766e+08	6.7757e+08	7.05777e+08	1.0109e+09	1.16147e+09	1.2807e+09	8.99045e+08	1.19585e+09	1.97858e+09	2.74626e+09	2.55917e+09
Montenegro	Gross fixed capital formation (including Acquisitions less disposals of valuables)	2.51117e+08	3.10109e+08	3.78869e+08	3.13957e+08	3.35875e+08	4.05821e+08	5.21931e+08	8.83236e+08	1.12394e+09	7.85446e+08	6.39811e+08	5.73921e+08	5.55153e+08	6.04276e+08
Montserrat	Gross fixed capital formation (including Acquisitions less disposals of valuables)	1.96195e+07	1.79839e+07	2.09041e+07	2.4974e+07	1.94704e+07	1.57519e+07	1.13208e+07	1.15352e+07	1.27763e+07	1.40281e+07	1.31871e+07	1.65904e+07	1.79035e+07	2.14595e+07
Morocco	Gross fixed capital formation (including Acquisitions less disposals of valuables)	1.20711e+10	1.21719e+10	1.30645e+10	1.40738e+10	1.52549e+10	1.63853e+10	1.79697e+10	2.05394e+10	2.28931e+10	2.34828e+10	2.33224e+10	2.38952e+10	2.4269e+10	2.43258e+10
Mozambique	Gross fixed capital formation (including Acquisitions less disposals of valuables)	1.08375e+09	8.19893e+08	1.09539e+09	1.01008e+09	9.53429e+08	1.05027e+09	1.11549e+09	1.18022e+09	1.59691e+09	1.79446e+09	1.92166e+09	2.2227e+09	2.39069e+09	2.48015e+09
Myanmar	Gross fixed capital formation (including Acquisitions less disposals of valuables)	6.45027e+08	7.04438e+08	7.47659e+08	9.62283e+08	1.17109e+09	1.51845e+09	1.89139e+09	2.40664e+09	2.87926e+09	3.88158e+09	5.13756e+09	6.9048e+09	7.53976e+09	8.13178e+09
Namibia	Gross fixed capital formation (including Acquisitions less disposals of valuables)	9.62999e+08	1.30272e+09	1.29267e+09	1.22812e+09	1.30453e+09	1.35146e+09	1.75394e+09	1.96695e+09	2.1913e+09	2.01649e+09	2.25184e+09	3.01096e+09	2.72499e+09	3.27272e+09
Nauru	Gross fixed capital formation (including Acquisitions less disposals of valuables)	1.58198e+07	1.49709e+07	1.44063e+07	1.33885e+07	1.30567e+07	1.12554e+07	9.21138e+06	1.04859e+07	1.81782e+07	1.46143e+07	1.78034e+07	2.02564e+07	2.3379e+07	3.04153e+07
Nepal	Gross fixed capital formation (including Acquisitions less disposals of valuables)	1.35521e+09	1.52669e+09	1.52871e+09	1.58646e+09	1.63834e+09	1.64695e+09	1.82967e+09	1.9264e+09	1.96211e+09	1.97178e+09	2.29942e+09	2.28277e+09	2.1973e+09	2.33179e+09
Netherlands	Gross fixed capital formation (including Acquisitions less disposals of valuables)	1.42647e+11	1.43395e+11	1.37146e+11	1.3446e+11	1.33723e+11	1.37646e+11	1.47497e+11	1.57153e+11	1.64635e+11	1.49472e+11	1.41134e+11	1.48985e+11	1.40014e+11	1.34451e+11
Netherlands Antilles (former)	Gross fixed capital formation (including Acquisitions less disposals of valuables)	9.42683e+08	9.52105e+08	9.65268e+08	9.59935e+08	9.54879e+08	9.81245e+08	1.08418e+09	1.24271e+09	1.29224e+09	1.23342e+09	1.25934e+09	1.2606e+09	1.25447e+09
New Caledonia	Gross fixed capital formation (including Acquisitions less disposals of valuables)	1.15446e+09	1.2445e+09	1.3664e+09	1.67195e+09	1.51321e+09	1.77391e+09	2.30077e+09	2.47963e+09	2.85433e+09	2.64973e+09	3.16775e+09	3.09463e+09	2.99544e+09	3.24014e+09
New Zealand	Gross fixed capital formation (including Acquisitions less disposals of valuables)	1.85949e+10	2.01642e+10	2.17579e+10	2.48395e+10	2.6858e+10	2.83889e+10	2.78269e+10	2.99768e+10	2.77539e+10	2.51695e+10	2.58039e+10	2.67632e+10	2.87292e+10	3.18672e+10
Nicaragua	Gross fixed capital formation (including Acquisitions less disposals of valuables)	1.38877e+09	1.31337e+09	1.23093e+09	1.23827e+09	1.32162e+09	1.45293e+09	1.48051e+09	1.68244e+09	1.73861e+09	1.37098e+09	1.33768e+09	1.59483e+09	1.90127e+09	1.87535e+09
Niger	Gross fixed capital formation (including Acquisitions less disposals of valuables)	4.13026e+08	5.07519e+08	5.50453e+08	5.174e+08	5.52764e+08	7.29178e+08	7.84325e+08	8.17131e+08	1.22333e+09	1.34085e+09	1.57078e+09	1.58416e+09	1.5512e+09	1.6115e+09
Nigeria	Gross fixed capital formation (including Acquisitions less disposals of valuables)	6.44609e+09	9.87221e+08	1.23749e+09	2.02563e+09	1.12854e+10	1.43872e+10	1.83895e+10	1.40166e+10	1.39149e+10	1.87529e+10	2.21995e+10	1.55873e+10	1.58806e+10	1.75535e+10
Norway	Gross fixed capital formation (including Acquisitions less disposals of valuables)	5.13184e+10	5.10052e+10	5.08267e+10	5.10108e+10	5.60913e+10	6.28009e+10	6.8544e+10	7.65954e+10	7.73133e+10	7.20677e+10	6.72796e+10	7.22431e+10	7.77321e+10	8.30361e+10
Oman	Gross fixed capital formation (including Acquisitions less disposals of valuables)	3.19811e+09	3.67793e+09	4.06468e+09	4.92054e+09	5.90031e+09	6.84297e+09	7.01522e+09	9.23933e+09	1.23427e+10	1.16418e+10	1.19078e+10	1.20355e+10	1.24094e+10	1.50556e+10
Pakistan	Gross fixed capital formation (including Acquisitions less disposals of valuables)	1.53657e+10	1.6049e+10	1.59911e+10	1.66472e+10	1.56268e+10	1.77431e+10	2.12742e+10	2.18517e+10	2.29222e+10	2.20227e+10	2.09107e+10	1.96008e+10	1.98901e+10	2.00455e+10
Palau	Gross fixed capital formation (including Acquisitions less disposals of valuables)	4.28609e+07	7.99812e+07	6.76557e+07	6.58477e+07	6.16829e+07	67071085	7.00036e+07	5.98505e+07	5.66965e+07	5.50007e+07	4.12292e+07	4.16332e+07	4.84817e+07	4.54512e+07
Panama	Gross fixed capital formation (including Acquisitions less disposals of valuables)	2.58437e+09	1.92045e+09	1.81226e+09	2.23429e+09	2.44395e+09	2601300000	3.03342e+09	4.27661e+09	5.358e+09	5.02647e+09	5.60759e+09	6.72078e+09	7.80303e+09	8.8794e+09
Papua New Guinea	Gross fixed capital formation (including Acquisitions less disposals of valuables)	7.84743e+08	8.29919e+08	8.77759e+08	7.56754e+08	7.53121e+08	8.02399e+08	7.24452e+08	7.84149e+08	8.43312e+08	1.28309e+09	1.72287e+09	2.16266e+09	2.38255e+09	2.38255e+09
Paraguay	Gross fixed capital formation (including Acquisitions less disposals of valuables)	1.3031e+09	1.22194e+09	1.2014e+09	1.35112e+09	1.41237e+09	1.45094e+09	1.50986e+09	1.69768e+09	2.00007e+09	1.86184e+09	2.26593e+09	2.51519e+09	2.32152e+09	2.67303e+09
Peru	Gross fixed capital formation (including Acquisitions less disposals of valuables)	1.11331e+10	1.0364e+10	1.03015e+10	1.08801e+10	1.16815e+10	1.29809e+10	1.54304e+10	1.89286e+10	2.41952e+10	2.27655e+10	2.80552e+10	3.0795e+10	3.53654e+10	3.72434e+10
Philippines	Gross fixed capital formation (including Acquisitions less disposals of valuables)	1.85638e+10	1.80492e+10	1.8581e+10	1.98174e+10	2.02446e+10	2.07222e+10	2.18393e+10	2.29837e+10	2.37079e+10	2.32933e+10	2.77332e+10	2.71887e+10	3.00282e+10	3.36058e+10
Poland	Gross fixed capital formation (including Acquisitions less disposals of valuables)	5.71892e+10	5.16269e+10	4.83848e+10	4.89662e+10	5.22484e+10	5.67965e+10	6.43604e+10	7.67368e+10	8.31441e+10	8.15985e+10	8.12831e+10	8.88625e+10	8.74961e+10	8.82505e+10
Portugal	Gross fixed capital formation (including Acquisitions less disposals of valuables)	5.04774e+10	5.09554e+10	4.9238e+10	4.56038e+10	4.56672e+10	4.57455e+10	4.53481e+10	4.67167e+10	4.69109e+10	4.33495e+10	4.29309e+10	3.7548e+10	3.19354e+10	2.99341e+10
Puerto Rico	Gross fixed capital formation (including Acquisitions less disposals of valuables)	1.22196e+10	1.17193e+10	1.17e+10	1.24505e+10	1.19245e+10	11833400000	1.15325e+10	1.04708e+10	9.16085e+09	8.5745e+09	9.39692e+09	9.89346e+09	9.2436e+09	9.38312e+09
Qatar	Gross fixed capital formation (including Acquisitions less disposals of valuables)	3.79656e+09	4.66156e+09	5.03906e+09	9.12405e+09	1.08781e+10	1.42547e+10	1.60837e+10	3.19063e+10	3.65486e+10	3.56771e+10	3.46601e+10	4.42253e+10	4.75188e+10	4.82877e+10
Republic of Korea	Gross fixed capital formation (including Acquisitions less disposals of valuables)	2.32214e+11	2.35768e+11	2.5211e+11	2.64209e+11	2.71751e+11	2.77174e+11	2.87021e+11	3.01338e+11	2.98773e+11	2.99661e+11	3.16193e+11	3.18815e+11	3.17271e+11	3.30738e+11
Republic of Moldova	Gross fixed capital formation (including Acquisitions less disposals of valuables)	4.03651e+08	4.73571e+08	5.00654e+08	5.93614e+08	6.42064e+08	7.34778e+08	8.9134e+08	1.11876e+09	1.14341e+09	7.90557e+08	9.2615e+08	1.0462e+09	1.06524e+09	1.10023e+09
Romania	Gross fixed capital formation (including Acquisitions less disposals of valuables)	1.63102e+10	1.91062e+10	2.30585e+10	2.59393e+10	1.97712e+10	2.42238e+10	2.92056e+10	4.42684e+10	5.21323e+10	3.29278e+10	3.19549e+10	3.28854e+10	3.35133e+10	3.1871e+10
Russian Federation	Gross fixed capital formation (including Acquisitions less disposals of valuables)	8.55253e+10	9.43758e+10	9.7038e+10	1.1058e+11	1.24553e+11	1.37833e+11	1.62696e+11	1.96827e+11	2.17872e+11	1.86532e+11	1.97631e+11	2.15621e+11	2.29692e+11	2.29299e+11
Rwanda	Gross fixed capital formation (including Acquisitions less disposals of valuables)	2.61585e+08	2.80886e+08	3.01426e+08	3.3229e+08	3.79829e+08	4.3817e+08	5.15111e+08	6.45657e+08	8.52945e+08	8.74841e+08	9.38692e+08	1.05196e+09	1.28055e+09	1.37509e+09
Saint Kitts and Nevis	Gross fixed capital formation (including Acquisitions less disposals of valuables)	2.1884e+08	2.40287e+08	2.13369e+08	2.15543e+08	2.07991e+08	2.29394e+08	2.40503e+08	2.6209e+08	2.48224e+08	2.30716e+08	1.84279e+08	1.60094e+08	1.50105e+08	1.68345e+08
Saint Lucia	Gross fixed capital formation (including Acquisitions less disposals of valuables)	2.51835e+08	2.3195e+08	2.07967e+08	1.99714e+08	2.21534e+08	2.69774e+08	3.56452e+08	3.43325e+08	3.97158e+08	3.5878e+08	3.463e+08	3.53641e+08	3.20069e+08	2.76187e+08
Samoa	Gross fixed capital formation (including Acquisitions less disposals of valuables)	4.76127e+07	5.19893e+07	4.89615e+07	4.85451e+07	4.64229e+07	4.52005e+07	4.27752e+07	4.24053e+07	3.86677e+07	4.04994e+07	4.04674e+07	4.07943e+07	4.18428e+07	4.20238e+07
San Marino	Gross fixed capital formation (including Acquisitions less disposals of valuables)	4.61104e+08	5.91822e+08	6.85192e+08	6.7801e+08	6.63645e+08	6.70827e+08	6.72264e+08	6.36118e+08	6.70249e+08	5.39011e+08	4.36617e+08	3.68355e+08	3.20523e+08	3.26849e+08
Sao Tome and Principe	Gross fixed capital formation (including Acquisitions less disposals of valuables)	3.14997e+07	3.27796e+07	3.08748e+07	3.32197e+07	3.33038e+07	3.30748e+07	3.15562e+07	3.86345e+07	3.81894e+07	3.48239e+07	3.62865e+07	3.90443e+07	3.83415e+07	4.11442e+07
Saudi Arabia	Gross fixed capital formation (including Acquisitions less disposals of valuables)	3.55968e+10	3.61538e+10	3.72901e+10	4.27205e+10	5.20196e+10	6.34336e+10	7.56823e+10	9.03391e+10	1.04021e+11	9.76131e+10	1.1184e+11	1.25985e+11	1.28272e+11	1.33849e+11
Senegal	Gross fixed capital formation (including Acquisitions less disposals of valuables)	1.55246e+09	1.64374e+09	1.68824e+09	1.74915e+09	1.91506e+09	2.03115e+09	2.29887e+09	2.46982e+09	2.66958e+09	2.55524e+09	2.59331e+09	2.82676e+09	2.87182e+09	3.08964e+09
Serbia	Gross fixed capital formation (including Acquisitions less disposals of valuables)	2.68003e+09	2.54345e+09	3.50669e+09	4.30124e+09	5.0952e+09	5.27128e+09	6.15504e+09	7.74591e+09	8.38263e+09	6.49275e+09	6.06884e+09	6.34518e+09	7.18548e+09	6.32241e+09
Seychelles	Gross fixed capital formation (including Acquisitions less disposals of valuables)	2.50376e+08	1.89907e+08	2.5109e+08	7.76935e+07	1.55774e+08	3.22727e+08	2.70647e+08	2.83879e+08	2.34206e+08	2.2677e+08	3.47022e+08	3.59355e+08	4.2906e+08	4.91313e+08
Sierra Leone	Gross fixed capital formation (including Acquisitions less disposals of valuables)	7.86657e+07	9.87239e+07	1.22945e+08	1.44382e+08	1.44943e+08	1.79704e+08	1.71685e+08	1.72147e+08	1.83808e+08	2.00366e+08	6.80952e+08	9.68211e+08	6.96381e+08	5.91816e+08
Singapore	Gross fixed capital formation (including Acquisitions less disposals of valuables)	2.89591e+10	2.84617e+10	2.52344e+10	2.39893e+10	2.64112e+10	2.65058e+10	3.0191e+10	3.53945e+10	4.03979e+10	3.90267e+10	4.15106e+10	4.4021e+10	4.78595e+10	4.6593e+10
Sint Maarten (Dutch part)	Gross fixed capital formation (including Acquisitions less disposals of valuables)						1.32961e+08	1.37989e+08	1.59274e+08	1.66816e+08	1.60447e+08	1.44972e+08	1.3419e+08	1.19777e+08	1.3575e+08
Slovakia	Gross fixed capital formation (including Acquisitions less disposals of valuables)	1.00563e+10	1.13567e+10	1.13561e+10	1.09918e+10	1.15095e+10	1.34088e+10	1.46258e+10	1.59234e+10	1.61767e+10	1.31548e+10	1.41076e+10	1.58928e+10	1.44133e+10	1.40311e+10
Slovenia	Gross fixed capital formation (including Acquisitions less disposals of valuables)	8.1935e+09	8.35789e+09	8.3999e+09	8.88467e+09	9.36373e+09	9.68854e+09	1.06765e+10	1.19531e+10	1.27925e+10	9.97722e+09	8.61375e+09	8.21664e+09	7.48822e+09	7.62741e+09
Solomon Islands	Gross fixed capital formation (including Acquisitions less disposals of valuables)	3.07079e+07	2.90317e+07	2.03728e+07	3.21169e+07	4.01738e+07	6.87528e+07	6.70254e+07	8.56957e+07	8.55161e+07	7.05217e+07	1.10032e+08	1.03178e+08	8.72297e+07	1.22764e+08
Somalia	Gross fixed capital formation (including Acquisitions less disposals of valuables)	4.5327e+08	4.8745e+08	4.69414e+08	4.69883e+08	4.71763e+08	4.69404e+08	4.97568e+08	5.04534e+08	5.15634e+08	5.3265e+08	5.44901e+08	5.58524e+08	5.73979e+08	5.88455e+08
South Africa	Gross fixed capital formation (including Acquisitions less disposals of valuables)	3.02436e+10	3.11052e+10	3.21916e+10	3.5487e+10	4.00567e+10	4.44564e+10	4.98555e+10	5.6715e+10	6.39873e+10	5.9715e+10	5.73788e+10	6.06634e+10	6.28503e+10	6.76418e+10
South Sudan	Gross fixed capital formation (including Acquisitions less disposals of valuables)									1.28949e+09	1.01917e+09	9.60777e+08	1.0308e+09	4.82238e+08	5.67324e+08
Spain	Gross fixed capital formation (including Acquisitions less disposals of valuables)	2.6081e+11	2.73543e+11	2.86179e+11	3.06133e+11	3.21837e+11	3.45921e+11	3.71365e+11	3.87596e+11	3.72376e+11	3.09548e+11	2.94486e+11	2.75852e+11	2.53527e+11	2.43997e+11
Sri Lanka	Gross fixed capital formation (including Acquisitions less disposals of valuables)	4.21959e+09	3.66591e+09	3.87286e+09	4.40797e+09	5.19455e+09	5.70422e+09	6.4384e+09	7.02709e+09	7.39931e+09	7.49876e+09	8.18618e+09	9.38077e+09	1.03812e+10	1.13362e+10
St. Vincent and the Grenadines	Gross fixed capital formation (including Acquisitions less disposals of valuables)	1.09808e+08	1.19502e+08	1.22102e+08	1.42391e+08	1.42826e+08	1.38093e+08	1.68827e+08	1.69097e+08	1.83066e+08	1.46697e+08	1.48535e+08	1.41338e+08	1.4236e+08	1.51603e+08
State of Palestine	Gross fixed capital formation (including Acquisitions less disposals of valuables)	1.28404e+09	1.02168e+09	8.54149e+08	1.08885e+09	1.11782e+09	1223000000	1.11068e+09	8.67322e+08	1.16045e+09	1.37384e+09	1.29279e+09	1.56269e+09	1.76572e+09	1.8519e+09
Sudan	Gross fixed capital formation (including Acquisitions less disposals of valuables)									5.66907e+09	6.26066e+09	7.12287e+09	6.7401e+09	6.59542e+09	6.87728e+09
Sudan (Former)	Gross fixed capital formation (including Acquisitions less disposals of valuables)	1.74728e+09	2.26622e+09	3.69761e+09	4.85033e+09	6.07534e+09	7.26362e+09	6.55457e+09	6.70298e+09	6.95856e+09	7.24713e+09	8.03038e+09
Suriname	Gross fixed capital formation (including Acquisitions less disposals of valuables)	7.4022e+08	8.64389e+08	7.95343e+08	6.98812e+08	9.20011e+08	9.99087e+08	8.82231e+08	1.03128e+09	1.15424e+09	1.23127e+09	1.03242e+09	1.25531e+09	1.27217e+09	1.26362e+09
Swaziland	Gross fixed capital formation (including Acquisitions less disposals of valuables)	4.21799e+08	4.99594e+08	4.62683e+08	4.52642e+08	3.85119e+08	3.88619e+08	3.42053e+08	3.41004e+08	3.13671e+08	2.94235e+08	2.82418e+08	2.7455e+08	2.70809e+08	5.91354e+08
Sweden	Gross fixed capital formation (including Acquisitions less disposals of valuables)	7.55856e+10	7.7453e+10	7.57026e+10	7.75645e+10	8.20723e+10	8.62299e+10	9.42858e+10	1.01928e+11	1.02498e+11	8.87941e+10	9.41397e+10	9.94601e+10	9.92316e+10	9.91089e+10
Switzerland	Gross fixed capital formation (including Acquisitions less disposals of valuables)	9.77062e+10	9.5579e+10	9.66447e+10	9.42861e+10	9.79506e+10	1.00897e+11	1.04547e+11	1.08716e+11	1.09736e+11	1.02914e+11	1.06779e+11	1.10692e+11	1.13571e+11	1.15365e+11
[truncated: 1,787 more rows]
