# Supplementary material
Source: ML conference proceedings conference paper supplement (https://openreview.net/forum?id=tfyr2zRVoK)
Supplement: supplementary_material [file 7_PricingTable_gt1.xlsx]

## Sheet: Sheet2
Dates
2015-09-16
2015-09-15
2015-09-16
2015-09-15
2015-09-17
2015-09-18
2015-09-17
2015-09-18
2015-09-18
2015-09-15
2015-09-17
2015-09-16
2015-09-15
2015-09-16
2015-09-16
2015-09-17
2015-09-15
2015-09-17
2015-09-18
2015-09-15
2015-09-16
2015-09-18
2015-09-16
2015-09-18
2015-09-18

## Sheet: Sheet1
Date	Number of Rolls	Price	Revenue
2015-09-16	540
2015-09-15	360
2015-09-16	12
2015-09-15	468
2015-09-17	48
2015-09-18	84
2015-09-17	540
2015-09-18	492
2015-09-18	204
2015-09-15	408
2015-09-17	780
2015-09-16	444
2015-09-15	432
2015-09-16	456
2015-09-16	768
2015-09-17	528
2015-09-15	624
2015-09-17	372
2015-09-18	588
2015-09-15	504
2015-09-16	504
2015-09-18	660
2015-09-16	468
2015-09-18	492
2015-09-18	204

## Sheet: Pricing Table
Units From	Units To	Price per Roll (100 feet)
0	143	198
144	288	187
289	577	168
578	999	152
