# Supplementary material
Source: ML conference proceedings conference paper supplement (https://openreview.net/forum?id=tfyr2zRVoK)
Supplement: supplementary_material [file 7_VelocityDisplacement_gt1.xlsx]

## Sheet: Sheet1
Displacement m	Velocity m/s	High Velocity?
2	21
4	35
6	46
8	57
10	78
12	83
14	95
16	110
18	115
20	124
22	130
24	145
26	170	+
28	180	+
30	190	+
32	192	+
34	210	+
36	222	+
38	225	+
40	240	+
