# Supplementary material
Source: ML conference proceedings conference paper supplement (https://openreview.net/forum?id=tfyr2zRVoK)
Supplement: supplementary_material [file 8_Dragging_gt1.xlsx]

## Sheet: Sheet1
Hanging Mass (m2) (kg)	Acceleration (m/s^2)	Percent Increase
0	0
0.01	0.128947
0.02	0.254545	97.4026
0.03	0.376923	48.0769
0.04	0.496203	31.6456
0.05	0.6125	23.4375
0.06	0.725926	18.5185
0.07	0.836585	15.2439
0.08	0.944578	12.9088
0.09	1.05	11.1607
0.1	1.15294	9.80392
0.11	1.25349	8.72093
0.12	1.35172	7.83699
0.13	1.44773	7.10227
0.14	1.54157	6.48228
0.15	1.63333	5.95238
0.16	1.72308	5.49451
0.17	1.81087	5.09511
0.18	1.89677	4.74383
0.19	1.98085	4.43262
0.2	2.06316	4.15512
0.21	2.14375	3.90625
0.22	2.22268	3.68189
0.23	2.3	3.47866
0.24	2.37576	3.29381
0.25	2.45	3.125
0.26	2.52277	2.9703
0.27	2.59412	2.82805
0.28	2.66408	2.69687
0.29	2.73269	2.57555
0.3	2.8	2.46305
0.31	2.86604	2.35849
0.32	2.93084	2.26108
0.33	2.99444	2.17014
0.34	3.05688	2.08507
0.35	3.11818	2.00535
0.36	3.17838	1.9305
0.37	3.2375	1.86012
0.38	3.29558	1.79383
0.39	3.35263	1.7313
0.4	3.4087	1.67224
0.41	3.46379	1.61638
0.42	3.51795	1.56348
0.43	3.57119	1.51332
0.44	3.62353	1.4657
0.45	3.675	1.42045
0.46	3.72562	1.37741
0.47	3.77541	1.33642
0.48	3.82439	1.29735
0.49	3.87258	1.26008
0.5	3.92	1.22449
0.51	3.96667	1.19048
0.52	4.0126	1.15794
0.53	4.05781	1.1268
0.54	4.10233	1.09697
0.55	4.14615	1.06838
0.56	4.18931	1.04094
0.57	4.23182	1.01461
0.58	4.27368	0.989315
0.59	4.31493	0.965003
0.6	4.35556	0.94162
0.61	4.39559	0.919118
0.62	4.43504	0.897451
0.63	4.47391	0.876578
0.64	4.51223	0.856458
0.65	4.55	0.837054
0.66	4.58723	0.818331
0.67	4.62394	0.800256
0.68	4.66014	0.782799
0.69	4.69583	0.765931
0.7	4.73103	0.749625
0.71	4.76575	0.733855
0.72	4.8	0.718597
0.73	4.83378	0.703829
0.74	4.86711	0.689528
0.75	4.9	0.675676
0.76	4.93245	0.662252
0.77	4.96447	0.649238
0.78	4.99608	0.636618
0.79	5.02727	0.624376
0.8	5.05806	0.612495
0.81	5.08846	0.600962
0.82	5.11847	0.589762
0.83	5.1481	0.578882
0.84	5.17736	0.568311
0.85	5.20625	0.558036
0.86	5.23478	0.548045
0.87	5.26296	0.538329
0.88	5.2908	0.528877
0.89	5.31829	0.519678
0.9	5.34545	0.510725
0.91	5.37229	0.502008
0.92	5.3988	0.493518
0.93	5.425	0.485248
0.94	5.45089	0.47719
0.95	5.47647	0.469337
0.96	5.50175	0.461681
0.97	5.52674	0.454215
0.98	5.55145	0.446934
0.99	5.57586	0.439831
1	5.6	0.4329
1.01	5.62386	0.426136
1.02	5.64746	0.419533
1.03	5.67079	0.413087
1.04	5.69385	0.406791
1.05	5.71667	0.400641
1.06	5.73923	0.394633
1.07	5.76154	0.388762
1.08	5.78361	0.383024
1.09	5.80543	0.377415
1.1	5.82703	0.371932
1.11	5.84839	0.366569
1.12	5.86952	0.361324
1.13	5.89043	0.356193
1.14	5.91111	0.351173
1.15	5.93158	0.34626
1.16	5.95183	0.341452
1.17	5.97188	0.336746
1.18	5.99171	0.332138
1.19	6.01134	0.327625
1.2	6.03077	0.323206
