# Supplementary material
Source: ML conference proceedings conference paper supplement (https://openreview.net/forum?id=tfyr2zRVoK)
Supplement: supplementary_material [file 8_EntireShippingCosts_gt1.xlsx]

## Sheet: Sheet1
Customers	Seattle	Milwaukee	Birmingham	Oakland	Distances
Chandler	1447	1830	1686	766	1447,1830,1686,766
Glendale	1405	1870	1715	744	1405,1870,1715,744
Mesa	1440	1816	1702	758	1440,1816,1702,758
Scottsdale	1435	1818	1706	754	1435,1818,1706,754
Little Rock	2277	743	373	1955	2277,743,373,1955
Antioch	796	2146	2299	36	796,2146,2299,36
Berkeley	795	2165	2319	4	795,2165,2319,4
Chula Vista	1258	2124	1996	499	1258,2124,1996,499
Concord	785	2155	2319	25	785,2155,2319,25
Daly City	813	2183	2329	21	813,2183,2329,21
Fairfield	759	2129	2339	41	759,2129,2339,41
Hayward	816	2186	2306	20	816,2186,2306,20
Huntington Beach	1162	2063	2034	404	1162,2063,2034,404
Long Beach	1156	2071	2042	398	1156,2071,2042,398
Modesto	822	2158	2248	82	822,2158,2248,82
Santa Clara	834	2204	2290	44	834,2204,2290,44
Sunnyvale	835	2205	2293	44	835,2205,2293,44
Thousand Oaks	1143	2092	2062	385	1143,2092,2062,385
Vallejo	773	2143	2328	25	773,2143,2328,25
Aurora	1332	1045	1318	1260	1332,1045,1318,1260
Colorado Springs	1388	1114	1312	1316	1388,1114,1312,1316
Denver	1318	1043	1328	1246	1318,1043,1328,1246
Chicago	2067	93	663	2124	2067,93,663,2124
Joliet	2052	126	671	2099	2052,126,671,2099
Evansville	2254	387	343	2214	2254,387,343,2214
Fort Wayne	2233	262	597	2269	2233,262,597,2269
Cedar Rapids	1832	244	782	1919	1832,244,782,1919
Kansas City	1842	576	695	1802	1842,576,695,1802
Topeka	1848	630	748	1776	1848,630,748,1776
Lexington-Fayette	2406	468	411	2383	2406,468,411,2383
Louisville-Jefferson County5	2340	401	363	2317	2340,401,363,2317
New Orleans	2617	1016	344	2265	2617,1016,344,2265
Baltimore	2771	800	781	2808	2771,800,781,2808
Ann Arbor	2314	343	710	2351	2314,343,710,2351
Detroit	2352	381	722	2389	2352,381,722,2389
St. Paul	1668	332	1069	1970	1668,332,1069,1970
Kansas City	1840	569	688	1800	1840,569,688,1800
St. Louis	2089	375	500	2050	2089,375,500,2050
Omaha	1659	508	869	1661	1659,508,869,1661
Henderson	1145	1806	1799	568	1145,1806,1799,568
Reno	738	1964	2267	256	738,1964,2267,256
Manchester	3087	1116	1214	3124	3087,1116,1214,3124
Elizabeth	2857	886	950	2894	2857,886,950,2894
Jersey City	2860	889	959	2896	2860,889,959,2896
Newark	2852	881	952	2889	2852,881,952,2889
New York	2863	892	964	2900	2863,892,964,2900
Yonkers	2873	902	980	2910	2873,902,980,2910
Cary	2876	905	543	2829	2876,905,543,2829
Durham	2856	885	531	2808	2856,885,531,2808
Cincinnati	2327	389	468	2374	2327,389,468,2374
Cleveland	2417	446	712	2453	2417,446,712,2453
Norman	2007	892	705	1639	2007,892,705,1639
Tulsa	2000	773	639	1718	2000,773,639,1718
Eugene	278	2173	2494	523	278,2173,2494,523
Portland	168	2065	2480	629	168,2065,2480,629
Philadelphia	2832	861	878	2869	2832,861,878,2869
Pittsburgh	2535	564	753	2572	2535,564,753,2572
Providence	3046	1075	1153	3083	3046,1075,1153,3083
Columbia	2835	903	362	2678	2835,903,362,2678
Sioux Falls	1478	497	1053	1727	1478,497,1053,1727
Clarksville	2359	561	232	2294	2359,561,232,2294
Killeen	2091	1156	741	1744	2091,1156,741,1744
Laredo	2219	1432	978	1780	2219,1432,978,1780
Mesquite	2123	1052	629	1734	2123,1052,629,1734
Alexandria	2781	811	746	2818	2781,811,746,2818
Hampton	2945	974	716	2950	2945,974,716,2950
Seattle	0	1995	2525	796	0,1995,2525,796
Spokane	282	1714	2244	864	282,1714,2244,864
Green Bay	1934	121	878	2224	1934,121,878,2224
Madison	1927	74	811	2091	1927,74,811,2091
