# Supplementary material
Source: ML conference proceedings conference paper supplement (https://openreview.net/forum?id=tfyr2zRVoK)
Supplement: supplementary_material [file 8_MaturityDate_gt1.xlsx]

## Sheet: Sheet2
Row Labels	Average of Length of Loan in Days
2010年	111.429
2011年	105
Grand Total	110

## Sheet: Sheet1
Loan Issue Date	Length of Loan in Days
2010-09-16	120
2010-12-09	90
2011-01-05	90
2010-09-10	100
2010-12-22	90
2010-10-17	120
2011-01-12	120
2010-09-18	180
2010-09-05	80
