# Supplementary material
Source: ML conference proceedings conference paper supplement (https://openreview.net/forum?id=tfyr2zRVoK)
Supplement: supplementary_material [file 9_EntireSummerSales_gt1.xlsx]

## Sheet: Sheet1
Date	Month	Week	Promotion	Sales Channel	Product	Revenue	Marked Date
2020-09-16	Sep	38	None	In Store Sales	Doublers	160.04	+
2020-07-01	Jul	27	None	In Store Sales	Sunshine	40.76	-
2020-06-02	Jun	23	Festival of Flight	E-mail Coupon	Crested Beaut	75.62	-
2020-05-15	May	20	None	Web Site Sales	Quad	99.29	-
2020-05-17	May	21	None	In Store Sales	Carlota	46.25	-
2020-06-10	Jun	24	Festival of Flight	In Store Sales	Majectic Beaut	28.28	-
2020-05-03	May	19	None	In Store Sales	Sunset	71.86	-
2020-05-13	May	20	None	Web Site Sales	Carlota	46.1	-
2020-09-02	Sep	36	None	Web Site Sales	Bellen	23.25	+
2020-07-03	Jul	27	None	Web Site Sales	Sunbell	50.9	-
2020-06-04	Jun	23	Festival of Flight	In Store Sales	Quad	66.85	-
2020-09-01	Sep	36	None	Web Site Sales	Sunset	24.68	+
2020-09-10	Sep	37	None	Web Site Sales	Carlota	89	+
2020-05-21	May	21	None	Web Site Sales	Quad	68.25	-
2020-07-26	Jul	31	None	In Store Sales	Sunshine	20.88	+
2020-05-12	May	20	None	Web Site Sales	Sunbell	24.75	-
2020-05-12	May	20	None	Web Site Sales	Doublers	80.95	-
2020-07-29	Jul	31	None	Web Site Sales	Quad	306.04	+
2020-05-18	May	21	None	Web Site Sales	Sunshine	20.01	-
2020-06-30	Jun	27	None	Web Site Sales	Carlota	69.85	-
2020-05-29	May	22	None	In Store Sales	Quad	99	-
2020-06-13	Jun	24	Festival of Flight	In Store Sales	Quad	68.39	-
2020-07-16	Jul	29	None	Web Site Sales	FlatTop	28.92
2020-07-29	Jul	31	None	In Store Sales	Carlota	46.85	+
2020-09-11	Sep	37	None	Web Site Sales	Aspen	479.13	+
2020-06-10	Jun	24	Festival of Flight	Web Site Sales	Sunset	47.35	-
2020-05-18	May	21	None	Web Site Sales	Sunbell	75.91	-
2020-06-28	Jun	27	None	Web Site Sales	Sunshine	60.4	-
2020-06-14	Jun	25	Festival of Flight	Web Site Sales	Sunbell	48.59	-
2020-07-08	Jul	28	None	Web Site Sales	Sunbell	23.48	-
2020-05-07	May	19	None	In Store Sales	Aspen	20.72	-
2020-07-28	Jul	31	None	Web Site Sales	Sunshine	60.73	+
2020-05-10	May	20	None	Web Site Sales	Majectic Beaut	413.97	-
2020-07-08	Jul	28	None	Web Site Sales	Sunshine	40.6	-
2020-05-31	May	23	Festival of Flight	Web Site Sales	Sunshine	57.14	-
2020-09-03	Sep	36	None	E-mail Coupon	FlatTop	83.12	+
2020-07-18	Jul	29	None	E-mail Coupon	Crested Beaut	72.02	+
2020-09-12	Sep	37	None	E-mail Coupon	Aspen	80.27	+
2020-09-06	Sep	37	None	E-mail Coupon	Sunshine	60.95	+
2020-05-11	May	20	None	In Store Sales	Carlota	23.07	-
2020-06-13	Jun	24	Festival of Flight	In Store Sales	Sunshine	60.63	-
2020-07-14	Jul	29	None	Web Site Sales	Aspen	40.43	-
2020-07-27	Jul	31	None	In Store Sales	Sunshine	40.34	+
2020-07-14	Jul	29	None	In Store Sales	Sunshine	19.05	-
2020-05-18	May	21	None	E-mail Coupon	Sunshine	40.36	-
2020-06-27	Jun	26	Festival of Flight	Web Site Sales	Majectic Beaut	90.41	-
2020-09-07	Sep	37	None	E-mail Coupon	Carlota	23.46	+
2020-07-24	Jul	30	None	Web Site Sales	Crested Beaut	46.27	+
2020-09-17	Sep	38	None	In Store Sales	FlatTop	83.46	+
2020-06-09	Jun	24	Festival of Flight	Web Site Sales	Sunbell	50.34	-
2020-07-21	Jul	30	None	In Store Sales	Bellen	46.37	+
2020-05-26	May	22	None	Web Site Sales	Carlota	23.79	-
2020-07-25	Jul	30	None	Web Site Sales	FlatTop	28.04	+
2020-05-21	May	21	None	Web Site Sales	Crested Beaut	251.68	-
2020-06-24	Jun	26	Festival of Flight	Web Site Sales	Quad	68.9	-
2020-09-10	Sep	37	None	In Store Sales	Doublers	160.76	+
2020-09-05	Sep	36	None	Web Site Sales	Sunshine	60.3	+
2020-06-27	Jun	26	Festival of Flight	Web Site Sales	Sunbell	50.12	-
2020-06-29	Jun	27	None	In Store Sales	FlatTop	470.63	-
2020-05-26	May	22	None	E-mail Coupon	Quad	68.45	-
2020-09-22	Sep	39	None	In Store Sales	Sunbell	342.28	+
2020-09-29	Sep	40	None	In Store Sales	Majectic Beaut	29.19	+
2020-07-08	Jul	28	None	In Store Sales	Bellen	46.92	-
2020-09-09	Sep	37	None	Web Site Sales	Bellen	23.44	+
2020-07-27	Jul	31	None	In Store Sales	Sunbell	48.2	+
2020-09-25	Sep	39	None	Web Site Sales	V-Rang	57.84	+
2020-05-15	May	20	None	Web Site Sales	Aspen	42.01	-
2020-09-06	Sep	37	None	Web Site Sales	Sunshine	40.05	+
2020-07-21	Jul	30	None	E-mail Coupon	Bellen	23.92	+
2020-07-24	Jul	30	None	E-mail Coupon	Carlota	92.84	+
2020-07-20	Jul	30	None	In Store Sales	Bellen	69.71	+
2020-09-23	Sep	39	None	E-mail Coupon	Quad	66.22	+
2020-07-01	Jul	27	None	In Store Sales	Sunbell	24.03	-
2020-07-08	Jul	28	None	Web Site Sales	FlatTop	55.43	-
2020-09-19	Sep	38	None	In Store Sales	Sunset	71.44	+
2020-05-05	May	19	None	In Store Sales	Carlota	22.34	-
2020-09-02	Sep	36	None	Web Site Sales	Carlota	46.86	+
2020-05-29	May	22	None	Web Site Sales	Majectic Beaut	203.87	-
2020-06-25	Jun	26	Festival of Flight	Web Site Sales	Bellen	66.62	-
2020-09-23	Sep	39	None	E-mail Coupon	FlatTop	27.14	+
2020-06-08	Jun	24	Festival of Flight	In Store Sales	Carlota	521.17	-
2020-05-15	May	20	None	In Store Sales	Sunshine	379.16	-
2020-05-01	May	18	None	In Store Sales	Sunshine	40.97	-
2020-09-10	Sep	37	None	Web Site Sales	Quad	102.52	+
2020-07-09	Jul	28	None	Web Site Sales	Quad	33.61	-
2020-09-24	Sep	39	None	Web Site Sales	Quad	99.11	+
2020-06-25	Jun	26	Festival of Flight	In Store Sales	Sunshine	57.17	-
2020-06-25	Jun	26	Festival of Flight	In Store Sales	Crested Beaut	24.05	-
2020-09-14	Sep	38	None	Web Site Sales	Bellen	69.4	+
2020-06-12	Jun	24	Festival of Flight	Web Site Sales	Quad	32.81	-
2020-07-20	Jul	30	None	In Store Sales	FlatTop	549.7	+
2020-06-01	Jun	23	Festival of Flight	In Store Sales	Sunset	45.9	-
2020-09-01	Sep	36	None	E-mail Coupon	Sunbell	23.95	+
2020-09-22	Sep	39	None	Web Site Sales	Bellen	69.17	+
2020-07-30	Jul	31	None	Web Site Sales	Bellen	46.31	+
2020-05-17	May	21	None	Web Site Sales	Sunbell	48.95	-
2020-05-24	May	22	None	In Store Sales	Quad	34.46	-
2020-09-09	Sep	37	None	Web Site Sales	Carlota	69.76	+
2020-07-10	Jul	28	None	In Store Sales	Carlota	66.64	-
2020-05-15	May	20	None	E-mail Coupon	Carlota	69.64	-
2020-09-07	Sep	37	None	Web Site Sales	Crested Beaut	69.89	+
2020-07-08	Jul	28	None	Web Site Sales	Sunshine	40.73	-
2020-07-21	Jul	30	None	Web Site Sales	Sunshine	20.56	+
2020-05-03	May	19	None	Web Site Sales	Aspen	57.98	-
2020-07-19	Jul	30	None	Web Site Sales	Sunbell	48.81	+
2020-05-05	May	19	None	Web Site Sales	Sunset	69	-
2020-09-11	Sep	37	None	In Store Sales	FlatTop	83.52	+
2020-09-03	Sep	36	None	In Store Sales	Bellen	69.74	+
2020-09-28	Sep	40	None	In Store Sales	Majectic Beaut	58.26	+
2020-07-19	Jul	30	None	Web Site Sales	Doublers	160.72	+
2020-05-20	May	21	None	In Store Sales	Quad	64.07	-
2020-07-01	Jul	27	None	Web Site Sales	Bellen	23.87	-
2020-09-09	Sep	37	None	In Store Sales	Sunshine	40.08	+
2020-09-11	Sep	37	None	Web Site Sales	FlatTop	83.29	+
2020-07-27	Jul	31	None	Web Site Sales	Sunset	424.31	+
2020-09-02	Sep	36	None	E-mail Coupon	Crested Beaut	24.82	+
2020-07-03	Jul	27	None	In Store Sales	Carlota	66.92	-
2020-06-11	Jun	24	Festival of Flight	Web Site Sales	Sunbell	48.4	-
2020-05-19	May	21	None	In Store Sales	FlatTop	83.96	-
2020-06-25	Jun	26	Festival of Flight	In Store Sales	Sunset	342.07	-
2020-06-16	Jun	25	Festival of Flight	Web Site Sales	Aspen	60.75	-
2020-07-11	Jul	28	None	In Store Sales	Carlota	46.51	-
2020-06-20	Jun	25	Festival of Flight	Web Site Sales	Bellen	161.34	-
2020-05-11	May	20	None	In Store Sales	Carlota	69.6	-
2020-09-22	Sep	39	None	Web Site Sales	Sunshine	20.67	+
2020-06-10	Jun	24	Festival of Flight	Web Site Sales	Bellen	46.53	-
2020-07-21	Jul	30	None	Web Site Sales	Sunbell	50.12	+
2020-09-12	Sep	37	None	In Store Sales	Bellen	44.17	+
2020-07-16	Jul	29	None	Web Site Sales	Carlota	69.99
2020-09-17	Sep	38	None	Web Site Sales	Carlota	46.7	+
2020-05-03	May	19	None	Web Site Sales	Majectic Beaut	29.46	-
2020-05-21	May	21	None	Web Site Sales	Sunset	268.61	-
2020-09-03	Sep	36	None	In Store Sales	Aspen	20.57	+
2020-09-24	Sep	39	None	E-mail Coupon	Quad	99.85	+
2020-06-07	Jun	24	Festival of Flight	In Store Sales	Sunset	71.95	-
2020-07-05	Jul	28	None	Web Site Sales	Sunbell	25.92	-
2020-06-14	Jun	25	Festival of Flight	Web Site Sales	Majectic Beaut	60.57	-
2020-07-13	Jul	29	None	Web Site Sales	Carlota	23.39	-
2020-09-20	Sep	39	None	Web Site Sales	Sunshine	40.57	+
2020-05-24	May	22	None	Web Site Sales	Carlota	44.26	-
2020-06-29	Jun	27	None	Web Site Sales	Quad	264.35	-
2020-06-17	Jun	25	Festival of Flight	Web Site Sales	Sunbell	24.55	-
2020-05-20	May	21	None	E-mail Coupon	Sunshine	20.68	-
2020-09-16	Sep	38	None	Web Site Sales	Quad	99.1	+
2020-09-24	Sep	39	None	Web Site Sales	Sunshine	20.56	+
2020-05-25	May	22	None	Web Site Sales	Bellen	46.58	-
2020-07-17	Jul	29	None	Web Site Sales	Quad	132.68	+
2020-09-17	Sep	38	None	Web Site Sales	Sunset	23.04	+
2020-07-26	Jul	31	None	Web Site Sales	Carlota	46.84	+
2020-09-02	Sep	36	None	Web Site Sales	Bellen	46.26	+
2020-09-12	Sep	37	None	In Store Sales	Sunshine	40.81	+
2020-09-21	Sep	39	None	E-mail Coupon	Sunshine	20.62	+
2020-06-22	Jun	26	Festival of Flight	Web Site Sales	Quad	165.67	-
2020-07-23	Jul	30	None	Web Site Sales	Quad	66.58	+
2020-07-29	Jul	31	None	Web Site Sales	Carlota	23.12	+
2020-09-29	Sep	40	None	Web Site Sales	Bellen	88.37	+
2020-07-11	Jul	28	None	Web Site Sales	Sunshine	60.87	-
2020-09-02	Sep	36	None	In Store Sales	Quad	99.74	+
2020-07-19	Jul	30	None	Web Site Sales	Sunbell	333.15	+
2020-09-08	Sep	37	None	Web Site Sales	Doublers	320.55	+
2020-05-19	May	21	None	E-mail Coupon	Crested Beaut	25.16	-
2020-05-20	May	21	None	In Store Sales	Sunbell	48.52	-
2020-05-16	May	20	None	In Store Sales	Doublers	160.85	-
2020-05-30	May	22	None	E-mail Coupon	Carlota	305.94	-
2020-05-26	May	22	None	In Store Sales	Quad	99.09	-
2020-05-04	May	19	None	Web Site Sales	Bellen	92.45	-
2020-09-11	Sep	37	None	Web Site Sales	FlatTop	55.43	+
2020-07-15	Jul	29	None	Web Site Sales	Sunshine	40.85	-
2020-07-26	Jul	31	None	In Store Sales	Sunshine	57.52	+
2020-06-09	Jun	24	Festival of Flight	E-mail Coupon	Quad	66.2	-
2020-07-22	Jul	30	None	Web Site Sales	Sunshine	40.28	+
2020-05-23	May	21	None	Web Site Sales	Bellen	46.16	-
2020-07-17	Jul	29	None	Web Site Sales	Sunshine	20.39	+
2020-07-26	Jul	31	None	Web Site Sales	Bellen	115.08	+
2020-09-17	Sep	38	None	Web Site Sales	Majectic Beaut	523.09	+
2020-09-12	Sep	37	None	Web Site Sales	Quad	102.47	+
2020-05-30	May	22	None	In Store Sales	Quad	66.22	-
2020-07-20	Jul	30	None	Web Site Sales	Quad	32.15	+
2020-09-25	Sep	39	None	E-mail Coupon	Bellen	69.68	+
2020-06-29	Jun	27	None	In Store Sales	Carlota	414.73	-
2020-07-22	Jul	30	None	In Store Sales	Aspen	40.52	+
2020-09-20	Sep	39	None	Web Site Sales	Quad	68.19	+
2020-09-07	Sep	37	None	Web Site Sales	Quad	102.82	+
2020-07-03	Jul	27	None	In Store Sales	Quad	132.81	-
2020-05-10	May	20	None	Web Site Sales	Sunbell	25.48	-
2020-05-08	May	19	None	Web Site Sales	Aspen	209.67	-
2020-05-11	May	20	None	In Store Sales	Crested Beaut	48.41	-
2020-07-04	Jul	27	None	Web Site Sales	Sunbell	50.92	-
2020-07-07	Jul	28	None	In Store Sales	Bellen	44.09	-
2020-05-14	May	20	None	Web Site Sales	Sunbell	48.09	-
2020-05-09	May	19	None	In Store Sales	Aspen	20.28	-
2020-09-15	Sep	38	None	In Store Sales	Sunbell	46.39	+
2020-06-15	Jun	25	Festival of Flight	In Store Sales	Sunshine	100.85	-
2020-09-02	Sep	36	None	Web Site Sales	Sunbell	48.79	+
2020-05-27	May	22	None	In Store Sales	Doublers	80.03	-
2020-05-12	May	20	None	E-mail Coupon	Quad	66.08	-
2020-05-08	May	19	None	Web Site Sales	Sunshine	60.99	-
2020-09-20	Sep	39	None	Web Site Sales	Sunshine	40.7	+
2020-05-19	May	21	None	Web Site Sales	Quad	64.47	-
2020-05-06	May	19	None	Web Site Sales	Sunshine	40.53	-
2020-05-27	May	22	None	In Store Sales	Carlota	69.3	-
2020-09-17	Sep	38	None	In Store Sales	Quad	102.29	+
2020-09-30	Sep	40	None	In Store Sales	Majectic Beaut	30.06	+
2020-06-26	Jun	26	Festival of Flight	Web Site Sales	Sunbell	48.72	-
2020-05-19	May	21	None	In Store Sales	Sunbell	72.92	-
2020-05-10	May	20	None	In Store Sales	Quad	32.84	-
2020-07-20	Jul	30	None	In Store Sales	Quad	690.21	+
2020-07-22	Jul	30	None	In Store Sales	Aspen	40.81	+
2020-09-07	Sep	37	None	In Store Sales	Bellen	23.83	+
2020-07-04	Jul	27	None	In Store Sales	Carlota	396.18	-
2020-06-25	Jun	26	Festival of Flight	Web Site Sales	Majectic Beaut	58.32	-
2020-05-24	May	22	None	Web Site Sales	Quad	306.2	-
2020-07-19	Jul	30	None	E-mail Coupon	Majectic Beaut	60.41	+
2020-05-25	May	22	None	In Store Sales	Majectic Beaut	112.68	-
2020-05-15	May	20	None	In Store Sales	Quad	33.77	-
2020-07-19	Jul	30	None	In Store Sales	Carlota	22.31	+
2020-05-05	May	19	None	In Store Sales	V-Rang	54.75	-
2020-06-30	Jun	27	None	In Store Sales	Bellen	46.83	-
2020-07-05	Jul	28	None	Web Site Sales	Sunset	24.75	-
2020-07-25	Jul	30	None	Web Site Sales	Sunshine	20.83	+
2020-09-05	Sep	36	None	In Store Sales	Quad	238.6	+
2020-07-12	Jul	29	None	Web Site Sales	Bellen	23.1	-
2020-05-30	May	22	None	In Store Sales	Quad	66.33	-
2020-07-27	Jul	31	None	Web Site Sales	Quad	66.2	+
2020-05-05	May	19	None	In Store Sales	Quad	68.71	-
2020-05-22	May	21	None	Web Site Sales	Sunshine	38.84	-
2020-07-09	Jul	28	None	Web Site Sales	Carlota	69.08	-
2020-07-07	Jul	28	None	Web Site Sales	Bellen	23.14	-
2020-05-25	May	22	None	E-mail Coupon	Quad	68.21	-
2020-09-09	Sep	37	None	E-mail Coupon	Aspen	105.14	+
2020-06-29	Jun	27	None	In Store Sales	Sunset	188.73	-
2020-09-10	Sep	37	None	In Store Sales	Carlota	69.1	+
2020-07-15	Jul	29	None	In Store Sales	Crested Beaut	240.41	-
2020-05-06	May	19	None	In Store Sales	Carlota	69.98	-
2020-09-22	Sep	39	None	In Store Sales	FlatTop	55.3	+
2020-05-03	May	19	None	Web Site Sales	Quad	99.67	-
2020-05-12	May	20	None	Web Site Sales	Crested Beaut	96.11	-
2020-07-06	Jul	28	None	In Store Sales	Doublers	160.15	-
2020-09-26	Sep	39	None	In Store Sales	Quad	66.93	+
2020-07-04	Jul	27	None	In Store Sales	Carlota	66.66	-
2020-05-04	May	19	None	In Store Sales	Bellen	44.15	-
2020-07-13	Jul	29	None	In Store Sales	Crested Beaut	72.98	-
2020-05-21	May	21	None	E-mail Coupon	Sunshine	40.36	-
2020-09-22	Sep	39	None	Web Site Sales	Aspen	57.84	+
2020-07-09	Jul	28	None	In Store Sales	Carlota	392.42	-
2020-09-26	Sep	39	None	In Store Sales	Bellen	44.32	+
2020-05-11	May	20	None	Web Site Sales	Aspen	63.02	-
2020-09-14	Sep	38	None	Web Site Sales	Sunbell	48.15	+
2020-05-18	May	21	None	In Store Sales	Sunshine	20.24	-
2020-09-19	Sep	38	None	Web Site Sales	Doublers	228.86	+
2020-09-12	Sep	37	None	In Store Sales	Carlota	69.02	+
2020-06-03	Jun	23	Festival of Flight	Web Site Sales	Doublers	312.94	-
2020-07-07	Jul	28	None	Web Site Sales	Doublers	240.7	-
2020-08-02	Aug	32	Fall Kite Event	Web Site Sales	Quad	517.89	+
2020-09-26	Sep	39	None	Web Site Sales	Sunshine	80.27	+
2020-07-13	Jul	29	None	Web Site Sales	Sunbell	75.09	-
2020-05-07	May	19	None	Web Site Sales	Crested Beaut	23.38	-
2020-05-14	May	20	None	Web Site Sales	Carlota	69.19	-
2020-09-27	Sep	40	None	In Store Sales	V-Rang	36.34	+
2020-07-17	Jul	29	None	Web Site Sales	Carlota	69.68	+
2020-07-21	Jul	30	None	In Store Sales	Carlota	22.86	+
2020-07-06	Jul	28	None	Web Site Sales	Bellen	66.75	-
2020-07-03	Jul	27	None	Web Site Sales	Quad	66.9	-
2020-07-04	Jul	27	None	Web Site Sales	Sunshine	40.07	-
2020-09-22	Sep	39	None	Web Site Sales	Sunshine	40.83	+
2020-07-17	Jul	29	None	In Store Sales	Carlota	46.27	+
2020-07-27	Jul	31	None	Web Site Sales	Bellen	66.38	+
2020-07-21	Jul	30	None	Web Site Sales	Crested Beaut	72.74	+
2020-07-08	Jul	28	None	Web Site Sales	Bellen	69.55	-
2020-06-30	Jun	27	None	In Store Sales	Majectic Beaut	87.58	-
2020-07-02	Jul	27	None	E-mail Coupon	Quad	32.92	-
2020-07-10	Jul	28	None	In Store Sales	Quad	376.52	-
2020-07-01	Jul	27	None	In Store Sales	Sunset	71.94	-
2020-07-20	Jul	30	None	In Store Sales	Aspen	20.22	+
2020-09-14	Sep	38	None	In Store Sales	Aspen	40.24	+
2020-09-11	Sep	37	None	In Store Sales	Quad	752.68	+
2020-08-19	Aug	34	Fall Kite Event	In Store Sales	Sunset	71.8	+
2020-09-14	Sep	38	None	E-mail Coupon	Carlota	69.5	+
2020-09-14	Sep	38	None	Web Site Sales	Quad	66.13	+
2020-06-03	Jun	23	Festival of Flight	E-mail Coupon	Aspen	40.44	-
2020-09-26	Sep	39	None	In Store Sales	Bellen	46.98	+
2020-05-23	May	21	None	E-mail Coupon	Sunshine	60.45	-
2020-09-21	Sep	39	None	Web Site Sales	Sunshine	40.98	+
2020-07-09	Jul	28	None	In Store Sales	Carlota	22.27	-
2020-05-21	May	21	None	In Store Sales	Bellen	46.21	-
2020-05-13	May	20	None	Web Site Sales	Quad	99.51	-
2020-07-28	Jul	31	None	E-mail Coupon	Bellen	44.01	+
2020-09-05	Sep	36	None	Web Site Sales	Quad	68.2	+
2020-09-03	Sep	36	None	Web Site Sales	Bellen	46.07	+
2020-08-15	Aug	33	Fall Kite Event	Web Site Sales	Sunset	45.82	+
2020-09-29	Sep	40	None	In Store Sales	Quad	34.48	+
2020-07-18	Jul	29	None	In Store Sales	Crested Beaut	72.19	+
2020-07-24	Jul	30	None	Web Site Sales	Sunbell	48.64	+
2020-05-17	May	21	None	Web Site Sales	Carlota	46.55	-
2020-05-08	May	19	None	In Store Sales	Majectic Beaut	84.64	-
2020-06-12	Jun	24	Festival of Flight	In Store Sales	Sunset	47.68	-
2020-09-27	Sep	40	None	Web Site Sales	Majectic Beaut	30.27	+
2020-09-09	Sep	37	None	In Store Sales	Quad	33.62	+
2020-07-02	Jul	27	None	In Store Sales	Sunbell	50.44	-
2020-07-29	Jul	31	None	In Store Sales	Bellen	46.92	+
2020-08-16	Aug	34	Fall Kite Event	Web Site Sales	Sunbell	24.56	+
2020-05-04	May	19	None	Web Site Sales	Carlota	23.52	-
2020-05-24	May	22	None	In Store Sales	Bellen	23.56	-
2020-07-04	Jul	27	None	Web Site Sales	Sunbell	75.4	-
2020-09-13	Sep	38	None	In Store Sales	Carlota	69.72	+
2020-05-21	May	21	None	E-mail Coupon	Bellen	23.47	-
2020-05-17	May	21	None	In Store Sales	Bellen	66.61	-
2020-09-27	Sep	40	None	Web Site Sales	Quad	33.54	+
2020-05-21	May	21	None	In Store Sales	Carlota	46.65	-
2020-09-13	Sep	38	None	Web Site Sales	Bellen	22.25	+
2020-09-07	Sep	37	None	In Store Sales	Quad	68.05	+
2020-09-21	Sep	39	None	Web Site Sales	Sunshine	19.8	+
2020-07-09	Jul	28	None	In Store Sales	Sunset	469.48	-
2020-05-24	May	22	None	Web Site Sales	Carlota	44.33	-
2020-05-14	May	20	None	In Store Sales	Sunset	94.43	-
2020-06-03	Jun	23	Festival of Flight	Web Site Sales	Sunshine	57.94	-
2020-08-21	Aug	34	Fall Kite Event	Web Site Sales	Quad	66.77	+
2020-09-28	Sep	40	None	Web Site Sales	Sunshine	20.13	+
2020-05-08	May	19	None	Web Site Sales	Carlota	22.24	-
2020-05-10	May	20	None	Web Site Sales	Quad	102.35	-
2020-05-08	May	19	None	In Store Sales	FlatTop	55.22	-
2020-06-04	Jun	23	Festival of Flight	Web Site Sales	Crested Beaut	96.74	-
2020-06-23	Jun	26	Festival of Flight	Web Site Sales	Majectic Beaut	60.84	-
2020-09-02	Sep	36	None	Web Site Sales	Aspen	20.24	+
2020-09-03	Sep	36	None	Web Site Sales	Sunshine	80.64	+
2020-07-24	Jul	30	None	Web Site Sales	V-Rang	36.38	+
2020-05-03	May	19	None	Web Site Sales	Bellen	46.22	-
2020-07-16	Jul	29	None	In Store Sales	Aspen	20.57
2020-09-18	Sep	38	None	E-mail Coupon	Carlota	23.46	+
2020-07-04	Jul	27	None	Web Site Sales	Sunshine	80.11	-
2020-07-26	Jul	31	None	In Store Sales	Aspen	259.17	+
2020-09-08	Sep	37	None	In Store Sales	Majectic Beaut	689.96	+
2020-07-09	Jul	28	None	Web Site Sales	Sunshine	38.29	-
2020-09-15	Sep	38	None	In Store Sales	Majectic Beaut	58.17	+
2020-09-26	Sep	39	None	Web Site Sales	Carlota	46.08	+
2020-09-06	Sep	37	None	E-mail Coupon	Sunset	71.39	+
2020-09-14	Sep	38	None	In Store Sales	Sunshine	40.94	+
2020-05-17	May	21	None	Web Site Sales	Aspen	20.18	-
2020-07-06	Jul	28	None	In Store Sales	Bellen	46.6	-
2020-05-14	May	20	None	In Store Sales	Carlota	44.6	-
2020-09-10	Sep	37	None	In Store Sales	V-Rang	36.26	+
2020-07-22	Jul	30	None	Web Site Sales	Quad	32.7	+
2020-05-23	May	21	None	Web Site Sales	Sunshine	60.81	-
2020-07-15	Jul	29	None	E-mail Coupon	Carlota	46.32	-
2020-09-08	Sep	37	None	E-mail Coupon	FlatTop	53.81	+
2020-07-26	Jul	31	None	In Store Sales	Majectic Beaut	58.22	+
2020-09-09	Sep	37	None	In Store Sales	Bellen	44.53	+
2020-07-31	Jul	31	None	Web Site Sales	Bellen	23.56	+
2020-05-06	May	19	None	In Store Sales	Bellen	44.73	-
2020-07-14	Jul	29	None	In Store Sales	Aspen	42.31	-
2020-09-25	Sep	39	None	Web Site Sales	Crested Beaut	75.73	+
2020-05-29	May	22	None	Web Site Sales	Sunbell	46.86	-
2020-09-03	Sep	36	None	In Store Sales	Quad	66.92	+
2020-05-20	May	21	None	E-mail Coupon	Crested Beaut	100.5	-
2020-06-26	Jun	26	Festival of Flight	Web Site Sales	Quad	33.92	-
2020-06-04	Jun	23	Festival of Flight	Web Site Sales	Sunbell	46.2	-
2020-07-28	Jul	31	None	Web Site Sales	Quad	439.53	+
2020-07-29	Jul	31	None	Web Site Sales	Bellen	46.4	+
2020-05-14	May	20	None	In Store Sales	Carlota	46.77	-
2020-09-04	Sep	36	None	Web Site Sales	Quad	66.38	+
2020-05-06	May	19	None	In Store Sales	Carlota	23.53	-
2020-07-02	Jul	27	None	E-mail Coupon	Sunshine	40.34	-
2020-09-30	Sep	40	None	In Store Sales	Crested Beaut	72.25	+
2020-05-16	May	20	None	In Store Sales	Majectic Beaut	87.66	-
2020-06-05	Jun	23	Festival of Flight	E-mail Coupon	Sunshine	20.61	-
2020-07-30	Jul	31	None	In Store Sales	Sunbell	24.4	+
2020-07-03	Jul	27	None	In Store Sales	Doublers	78.81	-
2020-09-12	Sep	37	None	Web Site Sales	Aspen	60.63	+
2020-05-14	May	20	None	Web Site Sales	Bellen	69.73	-
2020-05-19	May	21	None	Web Site Sales	Crested Beaut	46.04	-
2020-07-06	Jul	28	None	Web Site Sales	Bellen	23.51	-
2020-05-09	May	19	None	Web Site Sales	Carlota	23.36	-
2020-07-11	Jul	28	None	Web Site Sales	Bellen	46.86	-
2020-05-25	May	22	None	In Store Sales	Carlota	305.1	-
2020-05-23	May	21	None	E-mail Coupon	FlatTop	53.48	-
2020-08-15	Aug	33	Fall Kite Event	E-mail Coupon	Bellen	23.98	+
2020-05-24	May	22	None	Web Site Sales	Bellen	44.34	-
2020-09-10	Sep	37	None	In Store Sales	Aspen	21.09	+
2020-09-26	Sep	39	None	E-mail Coupon	Quad	33.71	+
2020-07-12	Jul	29	None	Web Site Sales	Bellen	23.99	-
2020-09-29	Sep	40	None	In Store Sales	Carlota	46.66	+
2020-05-17	May	21	None	Web Site Sales	Sunshine	322.34	-
2020-09-11	Sep	37	None	Web Site Sales	Bellen	46.25	+
2020-05-03	May	19	None	In Store Sales	Aspen	76.62	-
2020-07-25	Jul	30	None	In Store Sales	Quad	99.25	+
2020-09-17	Sep	38	None	E-mail Coupon	Carlota	44.92	+
2020-05-12	May	20	None	Web Site Sales	Sunshine	60.06	-
2020-09-08	Sep	37	None	In Store Sales	Crested Beaut	23.41	+
2020-07-15	Jul	29	None	In Store Sales	Doublers	80.06	-
2020-07-06	Jul	28	None	Web Site Sales	Sunshine	284.83	-
2020-09-02	Sep	36	None	Web Site Sales	Sunshine	57.34	+
2020-07-08	Jul	28	None	In Store Sales	Doublers	234.13	-
2020-06-12	Jun	24	Festival of Flight	E-mail Coupon	Crested Beaut	25.85	-
2020-05-09	May	19	None	Web Site Sales	Sunshine	20.56	-
2020-08-22	Aug	34	Fall Kite Event	E-mail Coupon	Crested Beaut	48.95	+
2020-07-28	Jul	31	None	In Store Sales	Bellen	23.31	+
2020-07-31	Jul	31	None	Web Site Sales	Sunshine	57.41	+
2020-09-20	Sep	39	None	In Store Sales	Quad	66.98	+
2020-08-28	Aug	35	Fall Kite Event	Web Site Sales	Doublers	228.46	+
2020-08-27	Aug	35	Fall Kite Event	In Store Sales	Majectic Beaut	90.56	+
2020-05-02	May	18	None	Web Site Sales	Bellen	23.8	-
2020-07-29	Jul	31	None	In Store Sales	Sunset	514.68	+
2020-07-03	Jul	27	None	Web Site Sales	Quad	64.8	-
2020-08-21	Aug	34	Fall Kite Event	Web Site Sales	Majectic Beaut	28.13	+
2020-05-28	May	22	None	In Store Sales	Bellen	69.22	-
2020-09-17	Sep	38	None	Web Site Sales	V-Rang	36.48	+
2020-09-13	Sep	38	None	E-mail Coupon	Sunshine	20.96	+
2020-09-10	Sep	37	None	In Store Sales	Majectic Beaut	58.88	+
2020-09-17	Sep	38	None	E-mail Coupon	Sunshine	160.43	+
2020-08-10	Aug	33	Fall Kite Event	In Store Sales	Crested Beaut	25.98	+
2020-09-15	Sep	38	None	Web Site Sales	Quad	99.98	+
2020-06-20	Jun	25	Festival of Flight	Web Site Sales	Bellen	46.43	-
2020-07-12	Jul	29	None	In Store Sales	Majectic Beaut	84.94	-
2020-08-15	Aug	33	Fall Kite Event	Web Site Sales	Bellen	115.62	+
2020-05-17	May	21	None	Web Site Sales	Sunbell	502.27	-
2020-07-27	Jul	31	None	E-mail Coupon	Aspen	40.02	+
2020-06-07	Jun	24	Festival of Flight	Web Site Sales	Bellen	230.14	-
2020-09-21	Sep	39	None	In Store Sales	Sunbell	72.38	+
2020-05-30	May	22	None	Web Site Sales	Sunbell	48.99	-
2020-07-11	Jul	28	None	Web Site Sales	Sunshine	20.76	-
2020-08-11	Aug	33	Fall Kite Event	E-mail Coupon	Doublers	240.06	+
2020-05-01	May	18	None	In Store Sales	V-Rang	38.48	-
2020-07-20	Jul	30	None	In Store Sales	Doublers	835.82	+
2020-05-20	May	21	None	In Store Sales	Majectic Beaut	87.36	-
2020-09-12	Sep	37	None	Web Site Sales	Sunshine	40.81	+
2020-05-22	May	21	None	In Store Sales	Sunshine	60.59	-
2020-07-13	Jul	29	None	In Store Sales	Aspen	40.68	-
2020-07-03	Jul	27	None	Web Site Sales	Carlota	305.94	-
2020-09-25	Sep	39	None	Web Site Sales	Sunshine	20.02	+
2020-07-09	Jul	28	None	In Store Sales	Quad	99.72	-
2020-08-19	Aug	34	Fall Kite Event	In Store Sales	Quad	34.61	+
2020-09-23	Sep	39	None	Web Site Sales	Bellen	69.51	+
2020-06-12	Jun	24	Festival of Flight	Web Site Sales	Sunshine	60.19	-
2020-05-02	May	18	None	Web Site Sales	Carlota	23.83	-
2020-07-13	Jul	29	None	In Store Sales	Sunset	47.92	-
2020-07-28	Jul	31	None	Web Site Sales	Aspen	43	+
2020-05-22	May	21	None	In Store Sales	Sunbell	48.21	-
2020-05-20	May	21	None	Web Site Sales	Crested Beaut	50	-
2020-05-09	May	19	None	In Store Sales	Quad	34.18	-
2020-08-08	Aug	32	Fall Kite Event	In Store Sales	Crested Beaut	437.31	+
2020-07-27	Jul	31	None	Web Site Sales	Carlota	46.88	+
2020-08-31	Aug	36	None	In Store Sales	Quad	66.06	+
2020-09-27	Sep	40	None	Web Site Sales	Aspen	76.69	+
2020-09-05	Sep	36	None	Web Site Sales	Bellen	69.82	+
2020-05-13	May	20	None	In Store Sales	Carlota	23.59	-
2020-07-02	Jul	27	None	Web Site Sales	Sunset	47.46	-
2020-05-07	May	19	None	Web Site Sales	Sunset	71.69	-
2020-09-14	Sep	38	None	Web Site Sales	Carlota	23.06	+
2020-07-25	Jul	30	None	E-mail Coupon	Majectic Beaut	29.59	+
2020-05-28	May	22	None	Web Site Sales	Quad	132.81	-
2020-06-23	Jun	26	Festival of Flight	Web Site Sales	Bellen	22.05	-
2020-05-23	May	21	None	Web Site Sales	Majectic Beaut	240.22	-
2020-07-12	Jul	29	None	Web Site Sales	Bellen	46.7	-
2020-09-15	Sep	38	None	In Store Sales	Sunbell	50.57	+
2020-07-21	Jul	30	None	In Store Sales	Quad	34	+
2020-05-27	May	22	None	In Store Sales	Sunbell	69.59	-
2020-06-17	Jun	25	Festival of Flight	Web Site Sales	Quad	66.79	-
2020-08-09	Aug	33	Fall Kite Event	In Store Sales	Sunbell	75.06	+
2020-09-15	Sep	38	None	In Store Sales	Sunset	491.22	+
2020-09-19	Sep	38	None	Web Site Sales	Sunshine	60.87	+
2020-07-15	Jul	29	None	In Store Sales	Quad	33.4	-
2020-08-18	Aug	34	Fall Kite Event	In Store Sales	Sunshine	20.89	+
2020-06-21	Jun	26	Festival of Flight	In Store Sales	Sunshine	40.18	-
2020-07-11	Jul	28	None	In Store Sales	Sunset	47.46	-
2020-05-26	May	22	None	Web Site Sales	Sunshine	80.66	-
2020-09-08	Sep	37	None	In Store Sales	Quad	102.72	+
2020-06-27	Jun	26	Festival of Flight	In Store Sales	Doublers	240.83	-
2020-09-21	Sep	39	None	In Store Sales	Aspen	60.3	+
2020-09-10	Sep	37	None	Web Site Sales	Quad	33.57	+
2020-06-14	Jun	25	Festival of Flight	In Store Sales	Crested Beaut	25.77	-
2020-08-10	Aug	33	Fall Kite Event	In Store Sales	Quad	99.44	+
2020-06-21	Jun	26	Festival of Flight	Web Site Sales	Aspen	63.34	-
2020-09-12	Sep	37	None	In Store Sales	Quad	66.94	+
2020-07-01	Jul	27	None	Web Site Sales	Carlota	22.64	-
2020-07-05	Jul	28	None	Web Site Sales	Majectic Beaut	87.38	-
2020-09-04	Sep	36	None	Web Site Sales	Quad	102.43	+
2020-05-13	May	20	None	E-mail Coupon	Bellen	66.51	-
2020-07-19	Jul	30	None	In Store Sales	Sunbell	69.45	+
2020-09-17	Sep	38	None	Web Site Sales	Sunbell	524.81	+
2020-07-15	Jul	29	None	In Store Sales	Bellen	46.16	-
2020-05-19	May	21	None	In Store Sales	FlatTop	106.2	-
2020-09-01	Sep	36	None	Web Site Sales	V-Rang	36.4	+
2020-08-30	Aug	36	None	Web Site Sales	Quad	96.64	+
2020-05-08	May	19	None	In Store Sales	Bellen	46.62	-
2020-09-22	Sep	39	None	In Store Sales	FlatTop	27.67	+
2020-07-11	Jul	28	None	E-mail Coupon	Sunshine	417.93	-
2020-05-04	May	19	None	Web Site Sales	Quad	752.78	-
2020-09-21	Sep	39	None	Web Site Sales	Crested Beaut	96.46	+
2020-05-26	May	22	None	Web Site Sales	Bellen	240.59	-
2020-05-21	May	21	None	Web Site Sales	V-Rang	36.96	-
2020-07-24	Jul	30	None	In Store Sales	Quad	68.39	+
2020-08-19	Aug	34	Fall Kite Event	Web Site Sales	Sunbell	48.74	+
2020-06-10	Jun	24	Festival of Flight	In Store Sales	FlatTop	28.24	-
2020-07-19	Jul	30	None	In Store Sales	Sunbell	72.17	+
2020-05-17	May	21	None	Web Site Sales	Sunbell	69.05	-
2020-06-05	Jun	23	Festival of Flight	E-mail Coupon	Crested Beaut	46.14	-
2020-05-20	May	21	None	In Store Sales	Carlota	46.27	-
2020-08-29	Aug	35	Fall Kite Event	E-mail Coupon	Bellen	138	+
2020-06-06	Jun	23	Festival of Flight	Web Site Sales	Aspen	57.66	-
2020-07-04	Jul	27	None	Web Site Sales	V-Rang	36.86	-
2020-07-26	Jul	31	None	In Store Sales	Majectic Beaut	60.83	+
2020-05-14	May	20	None	Web Site Sales	Bellen	88.62	-
2020-09-20	Sep	39	None	In Store Sales	FlatTop	80.28	+
2020-07-23	Jul	30	None	In Store Sales	Doublers	160.04	+
2020-09-06	Sep	37	None	In Store Sales	Sunshine	40.8	+
2020-05-03	May	19	None	In Store Sales	Sunshine	20.78	-
2020-07-13	Jul	29	None	Web Site Sales	Bellen	46.05	-
2020-06-24	Jun	26	Festival of Flight	Web Site Sales	V-Rang	36.22	-
2020-07-10	Jul	28	None	E-mail Coupon	Sunset	71.19	-
2020-08-12	Aug	33	Fall Kite Event	E-mail Coupon	Sunbell	96.89	+
2020-09-26	Sep	39	None	In Store Sales	Sunset	23.53	+
2020-09-03	Sep	36	None	In Store Sales	Sunbell	75.36	+
2020-06-02	Jun	23	Festival of Flight	In Store Sales	Sunbell	23.64	-
2020-06-01	Jun	23	Festival of Flight	Web Site Sales	Aspen	60.45	-
2020-07-31	Jul	31	None	In Store Sales	Sunbell	96.19	+
2020-05-30	May	22	None	Web Site Sales	Sunbell	48.53	-
2020-08-05	Aug	32	Fall Kite Event	In Store Sales	Quad	34.71	+
2020-05-30	May	22	None	In Store Sales	Bellen	23.88	-
2020-09-05	Sep	36	None	Web Site Sales	Majectic Beaut	58.52	+
2020-05-29	May	22	None	E-mail Coupon	Crested Beaut	69.96	-
2020-07-24	Jul	30	None	Web Site Sales	Quad	33.8	+
2020-08-09	Aug	33	Fall Kite Event	Web Site Sales	Crested Beaut	48.35	+
2020-09-19	Sep	38	None	In Store Sales	FlatTop	83	+
2020-08-08	Aug	32	Fall Kite Event	E-mail Coupon	V-Rang	54.35	+
2020-05-28	May	22	None	E-mail Coupon	Crested Beaut	48.61	-
2020-09-16	Sep	38	None	In Store Sales	Quad	132.64	+
2020-05-19	May	21	None	In Store Sales	Carlota	46.88	-
2020-06-29	Jun	27	None	In Store Sales	Bellen	46.66	-
2020-05-05	May	19	None	E-mail Coupon	Carlota	545.7	-
2020-06-18	Jun	25	Festival of Flight	Web Site Sales	FlatTop	28.19	-
2020-06-01	Jun	23	Festival of Flight	Web Site Sales	Sunshine	40.29	-
2020-08-06	Aug	32	Fall Kite Event	E-mail Coupon	Bellen	46.62	+
2020-05-03	May	19	None	Web Site Sales	Bellen	46.28	-
2020-06-28	Jun	27	None	Web Site Sales	Bellen	69.58	-
2020-06-20	Jun	25	Festival of Flight	Web Site Sales	Quad	627.63	-
2020-08-15	Aug	33	Fall Kite Event	In Store Sales	FlatTop	83.33	+
2020-08-17	Aug	34	Fall Kite Event	In Store Sales	Carlota	46.82	+
2020-06-29	Jun	27	None	Web Site Sales	V-Rang	38.65	-
2020-08-09	Aug	33	Fall Kite Event	E-mail Coupon	Sunshine	20.72	+
2020-06-15	Jun	25	Festival of Flight	In Store Sales	Quad	102.38	-
2020-08-11	Aug	33	Fall Kite Event	In Store Sales	Aspen	38.95	+
2020-06-16	Jun	25	Festival of Flight	E-mail Coupon	Sunshine	20.47	-
2020-08-08	Aug	32	Fall Kite Event	E-mail Coupon	Doublers	80.2	+
2020-06-30	Jun	27	None	Web Site Sales	Sunbell	24.61	-
2020-07-28	Jul	31	None	Web Site Sales	Quad	34	+
2020-08-09	Aug	33	Fall Kite Event	Web Site Sales	Sunset	257.96	+
2020-08-22	Aug	34	Fall Kite Event	In Store Sales	Sunbell	46.72	+
2020-06-24	Jun	26	Festival of Flight	In Store Sales	Sunbell	92.32	-
2020-06-29	Jun	27	None	Web Site Sales	Carlota	23.59	-
2020-08-27	Aug	35	Fall Kite Event	Web Site Sales	Carlota	46.53	+
2020-06-10	Jun	24	Festival of Flight	Web Site Sales	Quad	33.48	-
2020-07-14	Jul	29	None	Web Site Sales	Quad	66.91	-
2020-08-17	Aug	34	Fall Kite Event	E-mail Coupon	Majectic Beaut	28.88	+
2020-08-08	Aug	32	Fall Kite Event	E-mail Coupon	Sunshine	140.44	+
2020-06-11	Jun	24	Festival of Flight	Web Site Sales	Bellen	46.52	-
2020-05-25	May	22	None	In Store Sales	Quad	64.35	-
2020-06-11	Jun	24	Festival of Flight	Web Site Sales	Carlota	44.39	-
2020-06-19	Jun	25	Festival of Flight	Web Site Sales	Sunshine	40.24	-
2020-06-07	Jun	24	Festival of Flight	Web Site Sales	Carlota	46.48	-
2020-08-24	Aug	35	Fall Kite Event	Web Site Sales	Carlota	23.51	+
2020-06-12	Jun	24	Festival of Flight	In Store Sales	Sunset	24.16	-
2020-08-19	Aug	34	Fall Kite Event	Web Site Sales	Bellen	92.9	+
2020-08-08	Aug	32	Fall Kite Event	In Store Sales	Majectic Beaut	87.47	+
2020-08-24	Aug	35	Fall Kite Event	Web Site Sales	Bellen	69.98	+
2020-08-03	Aug	32	Fall Kite Event	Web Site Sales	Bellen	44.33	+
2020-08-31	Aug	36	None	In Store Sales	Quad	33.23	+
2020-08-16	Aug	34	Fall Kite Event	E-mail Coupon	Sunbell	72.45	+
2020-08-05	Aug	32	Fall Kite Event	Web Site Sales	FlatTop	27.59	+
2020-05-12	May	20	None	Web Site Sales	Sunshine	20.89	-
2020-06-19	Jun	25	Festival of Flight	Web Site Sales	Majectic Beaut	58.18	-
2020-06-11	Jun	24	Festival of Flight	Web Site Sales	Carlota	66.66	-
2020-06-17	Jun	25	Festival of Flight	Web Site Sales	Bellen	22.94	-
2020-06-15	Jun	25	Festival of Flight	E-mail Coupon	Quad	68.36	-
2020-08-15	Aug	33	Fall Kite Event	In Store Sales	Bellen	66.33	+
2020-06-16	Jun	25	Festival of Flight	Web Site Sales	Crested Beaut	50.75	-
2020-09-21	Sep	39	None	E-mail Coupon	Doublers	240.16	+
2020-06-27	Jun	26	Festival of Flight	Web Site Sales	Quad	68.36	-
2020-06-16	Jun	25	Festival of Flight	Web Site Sales	Doublers	80.54	-
2020-05-17	May	21	None	Web Site Sales	Carlota	480.07	-
2020-08-29	Aug	35	Fall Kite Event	Web Site Sales	Sunset	47.92	+
2020-09-25	Sep	39	None	Web Site Sales	Aspen	42.83	+
2020-05-10	May	20	None	In Store Sales	Aspen	63.41	-
2020-09-14	Sep	38	None	E-mail Coupon	Crested Beaut	50.04	+
2020-06-28	Jun	27	None	In Store Sales	Bellen	23.64	-
2020-08-04	Aug	32	Fall Kite Event	In Store Sales	Carlota	69.42	+
2020-08-06	Aug	32	Fall Kite Event	In Store Sales	Sunset	71.85	+
2020-08-05	Aug	32	Fall Kite Event	In Store Sales	Majectic Beaut	29.11	+
2020-06-28	Jun	27	None	Web Site Sales	Quad	730.52	-
2020-08-29	Aug	35	Fall Kite Event	In Store Sales	Majectic Beaut	28.97	+
2020-08-04	Aug	32	Fall Kite Event	In Store Sales	Crested Beaut	25.81	+
2020-06-28	Jun	27	None	In Store Sales	Bellen	46.21	-
2020-08-18	Aug	34	Fall Kite Event	In Store Sales	Carlota	22.56	+
2020-09-03	Sep	36	None	Web Site Sales	Sunset	47.7	+
2020-06-03	Jun	23	Festival of Flight	In Store Sales	Sunshine	60.03	-
2020-09-05	Sep	36	None	E-mail Coupon	Doublers	152.44	+
2020-08-17	Aug	34	Fall Kite Event	In Store Sales	FlatTop	83.66	+
2020-06-19	Jun	25	Festival of Flight	Web Site Sales	Bellen	69.75	-
2020-06-26	Jun	26	Festival of Flight	Web Site Sales	Majectic Beaut	58.01	-
2020-08-19	Aug	34	Fall Kite Event	In Store Sales	V-Rang	54.43	+
2020-06-16	Jun	25	Festival of Flight	Web Site Sales	Doublers	560.17	-
2020-06-18	Jun	25	Festival of Flight	Web Site Sales	Sunbell	50.24	-
2020-08-26	Aug	35	Fall Kite Event	Web Site Sales	Sunshine	60.84	+
2020-07-30	Jul	31	None	Web Site Sales	Bellen	46.18	+
2020-05-04	May	19	None	Web Site Sales	Quad	66.7	-
2020-06-07	Jun	24	Festival of Flight	In Store Sales	Crested Beaut	48.49	-
2020-06-16	Jun	25	Festival of Flight	In Store Sales	Crested Beaut	48.61	-
2020-08-06	Aug	32	Fall Kite Event	Web Site Sales	Carlota	46.2	+
2020-07-26	Jul	31	None	E-mail Coupon	Bellen	46.18	+
2020-06-09	Jun	24	Festival of Flight	In Store Sales	V-Rang	18.51	-
2020-06-23	Jun	26	Festival of Flight	In Store Sales	Sunshine	80.19	-
2020-06-07	Jun	24	Festival of Flight	Web Site Sales	Bellen	46.62	-
2020-05-28	May	22	None	E-mail Coupon	Quad	99.65	-
2020-06-06	Jun	23	Festival of Flight	Web Site Sales	Crested Beaut	72.4	-
2020-06-18	Jun	25	Festival of Flight	Web Site Sales	Sunshine	40.07	-
2020-08-10	Aug	33	Fall Kite Event	E-mail Coupon	Quad	33.15	+
2020-06-09	Jun	24	Festival of Flight	Web Site Sales	Sunshine	341.85	-
2020-06-10	Jun	24	Festival of Flight	Web Site Sales	Crested Beaut	25.99	-
2020-08-24	Aug	35	Fall Kite Event	Web Site Sales	Quad	102.05	+
2020-08-25	Aug	35	Fall Kite Event	In Store Sales	Aspen	38.32	+
2020-06-18	Jun	25	Festival of Flight	Web Site Sales	Aspen	38.05	-
2020-08-01	Aug	31	None	In Store Sales	Sunshine	60.4	+
2020-09-22	Sep	39	None	Web Site Sales	Quad	658.76	+
2020-08-22	Aug	34	Fall Kite Event	E-mail Coupon	Crested Beaut	69.87	+
2020-07-03	Jul	27	None	Web Site Sales	Crested Beaut	48.31	-
2020-08-25	Aug	35	Fall Kite Event	E-mail Coupon	Bellen	22.16	+
2020-06-21	Jun	26	Festival of Flight	Web Site Sales	Sunshine	40.51	-
2020-07-26	Jul	31	None	In Store Sales	Sunset	47.54	+
2020-08-16	Aug	34	Fall Kite Event	Web Site Sales	Doublers	228.22	+
2020-06-10	Jun	24	Festival of Flight	In Store Sales	Carlota	46.88	-
2020-06-22	Jun	26	Festival of Flight	In Store Sales	Carlota	46.62	-
2020-06-30	Jun	27	None	In Store Sales	Majectic Beaut	120.75	-
2020-08-17	Aug	34	Fall Kite Event	Web Site Sales	Crested Beaut	48.98	+
2020-06-04	Jun	23	Festival of Flight	Web Site Sales	Bellen	88.69	-
2020-08-09	Aug	33	Fall Kite Event	Web Site Sales	Majectic Beaut	60.87	+
2020-09-16	Sep	38	None	In Store Sales	FlatTop	83.02	+
2020-08-16	Aug	34	Fall Kite Event	Web Site Sales	Carlota	46.55	+
2020-08-24	Aug	35	Fall Kite Event	In Store Sales	Sunbell	25.85	+
2020-06-27	Jun	26	Festival of Flight	Web Site Sales	Crested Beaut	50.52	-
2020-09-12	Sep	37	None	Web Site Sales	Sunbell	46.22	+
2020-06-03	Jun	23	Festival of Flight	Web Site Sales	V-Rang	76.9	-
2020-06-27	Jun	26	Festival of Flight	In Store Sales	Carlota	69.39	-
2020-07-12	Jul	29	None	Web Site Sales	Quad	99.97	-
2020-08-27	Aug	35	Fall Kite Event	In Store Sales	Quad	33.41	+
2020-05-06	May	19	None	Web Site Sales	Crested Beaut	25.69	-
2020-08-26	Aug	35	Fall Kite Event	In Store Sales	Carlota	46.99	+
2020-06-09	Jun	24	Festival of Flight	Web Site Sales	Carlota	69.58	-
2020-09-12	Sep	37	None	Web Site Sales	Sunset	71.84	+
2020-06-19	Jun	25	Festival of Flight	Web Site Sales	Quad	64.54	-
2020-08-16	Aug	34	Fall Kite Event	In Store Sales	Aspen	40.4	+
2020-06-27	Jun	26	Festival of Flight	Web Site Sales	Majectic Beaut	87.19	-
2020-06-02	Jun	23	Festival of Flight	E-mail Coupon	Bellen	138.06	-
2020-06-08	Jun	24	Festival of Flight	Web Site Sales	Sunbell	46.49	-
2020-06-13	Jun	24	Festival of Flight	Web Site Sales	Majectic Beaut	523.74	-
2020-08-28	Aug	35	Fall Kite Event	Web Site Sales	Sunbell	72.96	+
2020-06-02	Jun	23	Festival of Flight	Web Site Sales	Carlota	92.47	-
2020-07-20	Jul	30	None	In Store Sales	Sunshine	60.43	+
2020-08-09	Aug	33	Fall Kite Event	In Store Sales	Quad	68.59	+
2020-06-27	Jun	26	Festival of Flight	In Store Sales	Quad	99.67	-
2020-08-23	Aug	35	Fall Kite Event	In Store Sales	Sunshine	60.42	+
2020-06-11	Jun	24	Festival of Flight	Web Site Sales	V-Rang	38.79	-
2020-05-28	May	22	None	In Store Sales	Quad	96.96	-
2020-08-09	Aug	33	Fall Kite Event	E-mail Coupon	Sunset	24.33	+
2020-06-01	Jun	23	Festival of Flight	Web Site Sales	Quad	99.83	-
2020-09-15	Sep	38	None	In Store Sales	Sunbell	46.16	+
2020-06-27	Jun	26	Festival of Flight	Web Site Sales	Sunshine	20.58	-
2020-05-19	May	21	None	Web Site Sales	Carlota	46.83	-
2020-08-30	Aug	36	None	In Store Sales	Quad	34.01	+
2020-07-24	Jul	30	None	Web Site Sales	Sunshine	38.77	+
2020-06-01	Jun	23	Festival of Flight	In Store Sales	Doublers	240.01	-
2020-07-05	Jul	28	None	Web Site Sales	Carlota	69.02	-
2020-08-22	Aug	34	Fall Kite Event	E-mail Coupon	Bellen	69.27	+
2020-08-29	Aug	35	Fall Kite Event	In Store Sales	Sunbell	48.69	+
2020-06-29	Jun	27	None	Web Site Sales	Bellen	46.82	-
2020-06-05	Jun	23	Festival of Flight	In Store Sales	Crested Beaut	48.67	-
2020-06-28	Jun	27	None	Web Site Sales	Bellen	23.27	-
2020-05-27	May	22	None	Web Site Sales	Carlota	46.34	-
2020-06-20	Jun	25	Festival of Flight	Web Site Sales	Majectic Beaut	58.48	-
2020-06-22	Jun	26	Festival of Flight	Web Site Sales	Carlota	69.2	-
2020-08-03	Aug	32	Fall Kite Event	In Store Sales	Aspen	60.72	+
2020-06-09	Jun	24	Festival of Flight	In Store Sales	Aspen	57.43	-
2020-06-07	Jun	24	Festival of Flight	Web Site Sales	Crested Beaut	24.24	-
2020-06-13	Jun	24	Festival of Flight	Web Site Sales	FlatTop	186.62	-
2020-06-21	Jun	26	Festival of Flight	In Store Sales	Quad	68.37	-
2020-08-02	Aug	32	Fall Kite Event	In Store Sales	Quad	34	+
2020-06-03	Jun	23	Festival of Flight	In Store Sales	Quad	32.36	-
2020-08-17	Aug	34	Fall Kite Event	In Store Sales	Sunbell	50.58	+
2020-06-27	Jun	26	Festival of Flight	Web Site Sales	Sunset	47.05	-
2020-06-24	Jun	26	Festival of Flight	In Store Sales	Bellen	44.27	-
2020-08-05	Aug	32	Fall Kite Event	In Store Sales	Carlota	46.29	+
2020-08-22	Aug	34	Fall Kite Event	Web Site Sales	Sunshine	57.74	+
2020-07-18	Jul	29	None	E-mail Coupon	Carlota	23.79	+
2020-09-04	Sep	36	None	Web Site Sales	Sunshine	180.32	+
2020-08-10	Aug	33	Fall Kite Event	In Store Sales	Carlota	46.6	+
2020-06-27	Jun	26	Festival of Flight	E-mail Coupon	Carlota	46.1	-
2020-08-06	Aug	32	Fall Kite Event	In Store Sales	Majectic Beaut	87.68	+
2020-06-15	Jun	25	Festival of Flight	Web Site Sales	Sunset	71.77	-
2020-06-16	Jun	25	Festival of Flight	In Store Sales	Quad	33.56	-
2020-08-22	Aug	34	Fall Kite Event	In Store Sales	Carlota	23.32	+
2020-09-01	Sep	36	None	Web Site Sales	FlatTop	601.94	+
2020-05-10	May	20	None	Web Site Sales	Sunset	47.03	-
2020-05-22	May	21	None	In Store Sales	Quad	68.08	-
2020-06-19	Jun	25	Festival of Flight	Web Site Sales	Bellen	46.84	-
2020-08-05	Aug	32	Fall Kite Event	In Store Sales	Bellen	46.09	+
2020-09-16	Sep	38	None	Web Site Sales	Carlota	23.83	+
2020-08-24	Aug	35	Fall Kite Event	In Store Sales	Aspen	20.62	+
2020-06-14	Jun	25	Festival of Flight	Web Site Sales	Bellen	44.56	-
2020-08-10	Aug	33	Fall Kite Event	In Store Sales	Bellen	23.19	+
2020-06-03	Jun	23	Festival of Flight	Web Site Sales	Quad	102.57	-
2020-05-30	May	22	None	In Store Sales	Doublers	240.23	-
2020-06-25	Jun	26	Festival of Flight	Web Site Sales	V-Rang	90.23	-
2020-06-29	Jun	27	None	Web Site Sales	Quad	160.67	-
2020-06-29	Jun	27	None	Web Site Sales	Carlota	66.97	-
2020-08-02	Aug	32	Fall Kite Event	In Store Sales	Bellen	44.78	+
2020-06-15	Jun	25	Festival of Flight	Web Site Sales	Bellen	66.76	-
2020-08-31	Aug	36	None	In Store Sales	V-Rang	57.57	+
2020-05-15	May	20	None	Web Site Sales	Quad	66.97	-
2020-06-15	Jun	25	Festival of Flight	Web Site Sales	Bellen	46.34	-
2020-06-18	Jun	25	Festival of Flight	E-mail Coupon	Carlota	23.29	-
2020-09-06	Sep	37	None	In Store Sales	Carlota	69.88	+
2020-08-14	Aug	33	Fall Kite Event	Web Site Sales	Majectic Beaut	90.6	+
2020-06-30	Jun	27	None	Web Site Sales	Quad	99.45	-
2020-08-09	Aug	33	Fall Kite Event	Web Site Sales	Sunbell	25.17	+
2020-07-30	Jul	31	None	Web Site Sales	Aspen	63.34	+
2020-06-07	Jun	24	Festival of Flight	In Store Sales	Carlota	327.91	-
2020-09-01	Sep	36	None	Web Site Sales	Sunset	24.88	+
2020-06-14	Jun	25	Festival of Flight	Web Site Sales	Sunshine	19.38	-
2020-06-22	Jun	26	Festival of Flight	Web Site Sales	Quad	68.08	-
2020-08-18	Aug	34	Fall Kite Event	Web Site Sales	Bellen	69.07	+
2020-08-06	Aug	32	Fall Kite Event	In Store Sales	Aspen	40.74	+
2020-08-06	Aug	32	Fall Kite Event	Web Site Sales	Crested Beaut	24.62	+
2020-06-24	Jun	26	Festival of Flight	In Store Sales	Quad	66.91	-
2020-06-05	Jun	23	Festival of Flight	Web Site Sales	Sunset	24.76	-
2020-08-17	Aug	34	Fall Kite Event	In Store Sales	Quad	102.34	+
2020-06-12	Jun	24	Festival of Flight	Web Site Sales	Aspen	80.86	-
2020-06-30	Jun	27	None	E-mail Coupon	Carlota	23.85	-
2020-06-22	Jun	26	Festival of Flight	Web Site Sales	Carlota	22.97	-
2020-06-26	Jun	26	Festival of Flight	In Store Sales	Crested Beaut	46.75	-
2020-06-28	Jun	27	None	Web Site Sales	Carlota	44.82	-
2020-08-26	Aug	35	Fall Kite Event	In Store Sales	Quad	99.42	+
2020-08-25	Aug	35	Fall Kite Event	Web Site Sales	Sunshine	38.57	+
2020-06-08	Jun	24	Festival of Flight	Web Site Sales	Carlota	176.27	-
2020-06-20	Jun	25	Festival of Flight	Web Site Sales	Quad	192.39	-
2020-06-29	Jun	27	None	Web Site Sales	Doublers	152.17	-
2020-08-05	Aug	32	Fall Kite Event	E-mail Coupon	Carlota	46.58	+
2020-06-16	Jun	25	Festival of Flight	Web Site Sales	Quad	96.55	-
2020-08-17	Aug	34	Fall Kite Event	In Store Sales	Quad	32.13	+
2020-08-30	Aug	36	None	In Store Sales	Bellen	46.88	+
2020-08-06	Aug	32	Fall Kite Event	Web Site Sales	Majectic Beaut	90.03	+
2020-05-11	May	20	None	Web Site Sales	Sunbell	46.21	-
2020-06-26	Jun	26	Festival of Flight	Web Site Sales	Carlota	22.27	-
2020-08-14	Aug	33	Fall Kite Event	In Store Sales	V-Rang	57.56	+
2020-06-02	Jun	23	Festival of Flight	In Store Sales	Bellen	46.08	-
2020-07-02	Jul	27	None	Web Site Sales	Crested Beaut	50.71	-
2020-08-12	Aug	33	Fall Kite Event	Web Site Sales	Sunshine	40.45	+
2020-08-28	Aug	35	Fall Kite Event	In Store Sales	Majectic Beaut	90.57	+
2020-06-07	Jun	24	Festival of Flight	In Store Sales	V-Rang	57.35	-
2020-09-21	Sep	39	None	Web Site Sales	Aspen	63.82	+
2020-06-15	Jun	25	Festival of Flight	In Store Sales	Carlota	46.08	-
2020-08-17	Aug	34	Fall Kite Event	In Store Sales	Bellen	69.13	+
2020-05-18	May	21	None	Web Site Sales	Sunbell	547.46	-
2020-06-12	Jun	24	Festival of Flight	Web Site Sales	Sunset	45.16	-
2020-06-24	Jun	26	Festival of Flight	Web Site Sales	Sunshine	19.62	-
2020-08-26	Aug	35	Fall Kite Event	In Store Sales	Quad	64.91	+
2020-08-29	Aug	35	Fall Kite Event	Web Site Sales	Aspen	63.3	+
2020-07-15	Jul	29	None	In Store Sales	Quad	99.77	-
2020-08-01	Aug	31	None	Web Site Sales	Bellen	92.23	+
2020-08-14	Aug	33	Fall Kite Event	In Store Sales	Sunset	23.41	+
2020-09-25	Sep	39	None	In Store Sales	Aspen	40.07	+
2020-06-03	Jun	23	Festival of Flight	Web Site Sales	FlatTop	554.95	-
2020-08-06	Aug	32	Fall Kite Event	In Store Sales	Sunshine	60.7	+
2020-08-11	Aug	33	Fall Kite Event	In Store Sales	Bellen	23.65	+
2020-08-23	Aug	35	Fall Kite Event	Web Site Sales	Quad	34.78	+
2020-06-18	Jun	25	Festival of Flight	Web Site Sales	Doublers	156.2	-
2020-08-27	Aug	35	Fall Kite Event	Web Site Sales	Sunbell	50.2	+
2020-05-13	May	20	None	Web Site Sales	Bellen	46.71	-
2020-08-06	Aug	32	Fall Kite Event	Web Site Sales	Crested Beaut	48.69	+
2020-08-11	Aug	33	Fall Kite Event	E-mail Coupon	Aspen	20.83	+
2020-08-16	Aug	34	Fall Kite Event	In Store Sales	Aspen	57.28	+
2020-08-02	Aug	32	Fall Kite Event	In Store Sales	Quad	64.44	+
2020-06-05	Jun	23	Festival of Flight	Web Site Sales	Sunbell	72.9	-
2020-06-19	Jun	25	Festival of Flight	Web Site Sales	Majectic Beaut	29.45	-
2020-06-10	Jun	24	Festival of Flight	In Store Sales	Bellen	23.82	-
2020-08-02	Aug	32	Fall Kite Event	E-mail Coupon	V-Rang	76	+
2020-07-21	Jul	30	None	Web Site Sales	Bellen	69.72	+
2020-06-18	Jun	25	Festival of Flight	In Store Sales	Carlota	66.48	-
2020-09-12	Sep	37	None	In Store Sales	Sunbell	75.49	+
2020-08-01	Aug	31	None	In Store Sales	Carlota	46.56	+
2020-06-14	Jun	25	Festival of Flight	In Store Sales	Sunshine	20.87	-
2020-06-21	Jun	26	Festival of Flight	In Store Sales	FlatTop	55.48	-
2020-06-26	Jun	26	Festival of Flight	Web Site Sales	Sunbell	50.71	-
2020-07-15	Jul	29	None	In Store Sales	Quad	66.1	-
2020-05-13	May	20	None	In Store Sales	Bellen	46.73	-
2020-06-27	Jun	26	Festival of Flight	E-mail Coupon	Sunshine	100.66	-
2020-06-09	Jun	24	Festival of Flight	Web Site Sales	Majectic Beaut	60.89	-
2020-08-29	Aug	35	Fall Kite Event	In Store Sales	Bellen	69.16	+
2020-08-25	Aug	35	Fall Kite Event	Web Site Sales	Quad	64.55	+
2020-06-15	Jun	25	Festival of Flight	E-mail Coupon	Majectic Beaut	84.47	-
2020-06-04	Jun	23	Festival of Flight	Web Site Sales	Bellen	23.48	-
2020-06-04	Jun	23	Festival of Flight	E-mail Coupon	Majectic Beaut	60.73	-
2020-06-15	Jun	25	Festival of Flight	In Store Sales	Carlota	23.28	-
2020-06-02	Jun	23	Festival of Flight	Web Site Sales	Sunbell	50.41	-
2020-07-23	Jul	30	None	Web Site Sales	Sunbell	75.61	+
2020-07-29	Jul	31	None	In Store Sales	Crested Beaut	296.78	+
2020-08-16	Aug	34	Fall Kite Event	In Store Sales	Aspen	38.83	+
2020-08-21	Aug	34	Fall Kite Event	In Store Sales	Bellen	46.42	+
2020-08-25	Aug	35	Fall Kite Event	Web Site Sales	Sunshine	38.39	+
2020-05-23	May	21	None	Web Site Sales	Carlota	22.38	-
2020-07-14	Jul	29	None	E-mail Coupon	V-Rang	38.24	-
2020-08-07	Aug	32	Fall Kite Event	In Store Sales	Sunbell	48.37	+
2020-08-01	Aug	31	None	E-mail Coupon	Bellen	23.02	+
2020-06-10	Jun	24	Festival of Flight	In Store Sales	Sunset	45.6	-
2020-08-29	Aug	35	Fall Kite Event	In Store Sales	Aspen	19.42	+
2020-08-24	Aug	35	Fall Kite Event	In Store Sales	Doublers	76.98	+
2020-06-07	Jun	24	Festival of Flight	Web Site Sales	Sunshine	20.87	-
2020-07-28	Jul	31	None	In Store Sales	V-Rang	57.85	+
2020-08-19	Aug	34	Fall Kite Event	Web Site Sales	Aspen	19.46	+
2020-08-19	Aug	34	Fall Kite Event	In Store Sales	Quad	64.65	+
2020-06-23	Jun	26	Festival of Flight	Web Site Sales	Aspen	38.6	-
2020-06-16	Jun	25	Festival of Flight	Web Site Sales	V-Rang	18.66	-
2020-08-10	Aug	33	Fall Kite Event	Web Site Sales	Majectic Beaut	29.45	+
2020-06-15	Jun	25	Festival of Flight	Web Site Sales	Sunshine	432.85	-
2020-08-27	Aug	35	Fall Kite Event	Web Site Sales	Majectic Beaut	58.93	+
2020-08-04	Aug	32	Fall Kite Event	In Store Sales	Sunshine	60.07	+
2020-05-18	May	21	None	Web Site Sales	Sunbell	50.23	-
2020-08-14	Aug	33	Fall Kite Event	In Store Sales	Bellen	46.11	+
2020-08-27	Aug	35	Fall Kite Event	In Store Sales	Bellen	44.16	+
2020-06-28	Jun	27	None	Web Site Sales	Majectic Beaut	87.83	-
2020-06-19	Jun	25	Festival of Flight	In Store Sales	Carlota	23.57	-
2020-05-10	May	20	None	E-mail Coupon	Aspen	60.88	-
2020-06-05	Jun	23	Festival of Flight	Web Site Sales	Doublers	80.74	-
2020-09-05	Sep	36	None	Web Site Sales	Quad	99.44	+
2020-06-08	Jun	24	Festival of Flight	In Store Sales	V-Rang	308.87	-
2020-08-16	Aug	34	Fall Kite Event	In Store Sales	Sunshine	38.86	+
2020-06-14	Jun	25	Festival of Flight	E-mail Coupon	Aspen	38.48	-
2020-09-11	Sep	37	None	Web Site Sales	V-Rang	36.89	+
2020-06-22	Jun	26	Festival of Flight	Web Site Sales	Bellen	46.16	-
2020-08-16	Aug	34	Fall Kite Event	In Store Sales	Aspen	40.26	+
2020-06-27	Jun	26	Festival of Flight	Web Site Sales	Carlota	46.88	-
2020-06-18	Jun	25	Festival of Flight	Web Site Sales	Quad	66.07	-
2020-08-17	Aug	34	Fall Kite Event	In Store Sales	Majectic Beaut	90.57	+
2020-09-11	Sep	37	None	Web Site Sales	Sunshine	40.54	+
2020-08-09	Aug	33	Fall Kite Event	In Store Sales	Sunbell	50.42	+
2020-08-21	Aug	34	Fall Kite Event	E-mail Coupon	Sunset	47.13	+
2020-06-03	Jun	23	Festival of Flight	In Store Sales	Sunshine	60.84	-
2020-08-17	Aug	34	Fall Kite Event	In Store Sales	Carlota	46.98	+
2020-07-25	Jul	30	None	Web Site Sales	V-Rang	36.95	+
2020-09-16	Sep	38	None	In Store Sales	Sunset	90.97	+
2020-06-12	Jun	24	Festival of Flight	Web Site Sales	Majectic Beaut	30.27	-
2020-06-01	Jun	23	Festival of Flight	In Store Sales	Carlota	46.27	-
2020-06-30	Jun	27	None	Web Site Sales	Sunset	68.64	-
2020-06-16	Jun	25	Festival of Flight	Web Site Sales	Sunbell	48.22	-
2020-08-18	Aug	34	Fall Kite Event	In Store Sales	Sunset	165.2	+
2020-08-25	Aug	35	Fall Kite Event	In Store Sales	Carlota	46.94	+
2020-08-14	Aug	33	Fall Kite Event	Web Site Sales	Quad	68.54	+
2020-08-11	Aug	33	Fall Kite Event	In Store Sales	Bellen	69.54	+
2020-06-22	Jun	26	Festival of Flight	Web Site Sales	Carlota	69.92	-
2020-08-10	Aug	33	Fall Kite Event	In Store Sales	Quad	33.42	+
2020-05-22	May	21	None	E-mail Coupon	Carlota	46.14	-
2020-08-04	Aug	32	Fall Kite Event	In Store Sales	Sunbell	96.73	+
2020-08-31	Aug	36	None	In Store Sales	Bellen	46.17	+
2020-08-01	Aug	31	None	In Store Sales	Sunbell	75.77	+
2020-07-22	Jul	30	None	In Store Sales	Bellen	92.92	+
2020-06-24	Jun	26	Festival of Flight	Web Site Sales	Quad	68.72	-
2020-06-11	Jun	24	Festival of Flight	Web Site Sales	Quad	64.29	-
2020-06-10	Jun	24	Festival of Flight	Web Site Sales	Quad	99.52	-
2020-06-08	Jun	24	Festival of Flight	Web Site Sales	Aspen	20.12	-
2020-08-29	Aug	35	Fall Kite Event	In Store Sales	Majectic Beaut	58.7	+
2020-05-06	May	19	None	E-mail Coupon	Sunshine	20.52	-
2020-07-06	Jul	28	None	In Store Sales	Carlota	23.28	-
2020-09-15	Sep	38	None	Web Site Sales	Sunset	514.06	+
2020-06-12	Jun	24	Festival of Flight	In Store Sales	Carlota	46.94	-
2020-05-17	May	21	None	Web Site Sales	Sunbell	46.85	-
2020-08-11	Aug	33	Fall Kite Event	In Store Sales	Sunshine	60.62	+
2020-06-19	Jun	25	Festival of Flight	Web Site Sales	Bellen	46.1	-
2020-06-10	Jun	24	Festival of Flight	Web Site Sales	Majectic Beaut	570.93	-
2020-05-08	May	19	None	Web Site Sales	Aspen	42.72	-
2020-06-21	Jun	26	Festival of Flight	Web Site Sales	Sunset	71.13	-
2020-08-19	Aug	34	Fall Kite Event	Web Site Sales	Sunshine	40.65	+
2020-06-27	Jun	26	Festival of Flight	Web Site Sales	Sunshine	40.8	-
2020-05-11	May	20	None	E-mail Coupon	Quad	68.13	-
2020-06-03	Jun	23	Festival of Flight	Web Site Sales	Carlota	23.26	-
2020-09-10	Sep	37	None	Web Site Sales	Aspen	38.98	+
2020-07-26	Jul	31	None	Web Site Sales	Sunbell	48.75	+
2020-09-25	Sep	39	None	In Store Sales	Crested Beaut	72.06	+
2020-08-16	Aug	34	Fall Kite Event	In Store Sales	Quad	132.27	+
2020-06-26	Jun	26	Festival of Flight	In Store Sales	Doublers	240.39	-
2020-06-07	Jun	24	Festival of Flight	Web Site Sales	Crested Beaut	25.49	-
2020-09-14	Sep	38	None	In Store Sales	Carlota	23.91	+
2020-08-04	Aug	32	Fall Kite Event	E-mail Coupon	Crested Beaut	48.98	+
2020-09-03	Sep	36	None	Web Site Sales	Doublers	240.17	+
2020-06-23	Jun	26	Festival of Flight	Web Site Sales	Bellen	414.74	-
2020-08-14	Aug	33	Fall Kite Event	Web Site Sales	Sunbell	23.45	+
2020-08-27	Aug	35	Fall Kite Event	E-mail Coupon	Carlota	305.39	+
2020-06-15	Jun	25	Festival of Flight	Web Site Sales	Sunshine	455.46	-
2020-09-19	Sep	38	None	Web Site Sales	Carlota	23.64	+
2020-06-21	Jun	26	Festival of Flight	In Store Sales	Quad	99.08	-
2020-05-13	May	20	None	In Store Sales	FlatTop	28.35	-
2020-08-30	Aug	36	None	In Store Sales	Doublers	835.55	+
2020-06-07	Jun	24	Festival of Flight	Web Site Sales	Sunshine	40.84	-
2020-08-27	Aug	35	Fall Kite Event	Web Site Sales	Carlota	23.67	+
2020-07-12	Jul	29	None	In Store Sales	Quad	64.73	-
2020-09-25	Sep	39	None	Web Site Sales	Carlota	23.51	+
2020-08-22	Aug	34	Fall Kite Event	In Store Sales	Quad	272.22	+
2020-06-30	Jun	27	None	In Store Sales	Sunbell	24.18	-
2020-08-13	Aug	33	Fall Kite Event	In Store Sales	Doublers	240.19	+
2020-06-16	Jun	25	Festival of Flight	In Store Sales	FlatTop	470.98	-
2020-08-02	Aug	32	Fall Kite Event	In Store Sales	Sunshine	20.78	+
2020-06-19	Jun	25	Festival of Flight	In Store Sales	Aspen	259.74	-
2020-08-11	Aug	33	Fall Kite Event	In Store Sales	Sunset	71.05	+
2020-08-07	Aug	32	Fall Kite Event	Web Site Sales	Carlota	46.3	+
2020-08-31	Aug	36	None	In Store Sales	Aspen	42.04	+
2020-05-20	May	21	None	Web Site Sales	Sunbell	50.98	-
2020-09-18	Sep	38	None	Web Site Sales	Quad	96.43	+
2020-06-24	Jun	26	Festival of Flight	E-mail Coupon	Sunshine	20.38	-
2020-06-12	Jun	24	Festival of Flight	In Store Sales	Bellen	46.69	-
2020-08-11	Aug	33	Fall Kite Event	Web Site Sales	Quad	486.68	+
2020-09-29	Sep	40	None	Web Site Sales	Carlota	69.25	+
2020-07-21	Jul	30	None	Web Site Sales	Quad	99.01	+
2020-08-27	Aug	35	Fall Kite Event	In Store Sales	Carlota	23.16	+
2020-06-17	Jun	25	Festival of Flight	E-mail Coupon	Majectic Beaut	58.53	-
2020-06-13	Jun	24	Festival of Flight	Web Site Sales	Sunshine	20.12	-
2020-06-18	Jun	25	Festival of Flight	In Store Sales	Bellen	161.48	-
2020-08-28	Aug	35	Fall Kite Event	In Store Sales	V-Rang	36.75	+
2020-06-12	Jun	24	Festival of Flight	E-mail Coupon	Carlota	46.04	-
2020-09-26	Sep	39	None	Web Site Sales	Carlota	23.47	+
2020-06-08	Jun	24	Festival of Flight	Web Site Sales	Sunshine	436.31	-
2020-06-06	Jun	23	Festival of Flight	Web Site Sales	Doublers	152.8	-
2020-08-23	Aug	35	Fall Kite Event	Web Site Sales	Crested Beaut	46.13	+
2020-08-06	Aug	32	Fall Kite Event	E-mail Coupon	Sunset	45.07	+
2020-09-29	Sep	40	None	Web Site Sales	V-Rang	19.73	+
2020-08-21	Aug	34	Fall Kite Event	In Store Sales	Carlota	240.64	+
2020-06-06	Jun	23	Festival of Flight	Web Site Sales	Majectic Beaut	441.09	-
2020-06-27	Jun	26	Festival of Flight	Web Site Sales	Quad	99.37	-
2020-08-04	Aug	32	Fall Kite Event	E-mail Coupon	Bellen	69.28	+
2020-06-28	Jun	27	None	Web Site Sales	Bellen	46.88	-
2020-06-20	Jun	25	Festival of Flight	Web Site Sales	Quad	99.28	-
2020-06-18	Jun	25	Festival of Flight	Web Site Sales	Sunset	23.9	-
2020-08-26	Aug	35	Fall Kite Event	Web Site Sales	Sunbell	92.43	+
2020-09-11	Sep	37	None	Web Site Sales	Sunshine	40.94	+
2020-06-12	Jun	24	Festival of Flight	Web Site Sales	Quad	96.81	-
2020-06-06	Jun	23	Festival of Flight	In Store Sales	Bellen	69.36	-
2020-08-29	Aug	35	Fall Kite Event	Web Site Sales	Sunshine	40.51	+
2020-05-23	May	21	None	In Store Sales	Quad	160.6	-
2020-08-03	Aug	32	Fall Kite Event	Web Site Sales	FlatTop	55.36	+
2020-08-09	Aug	33	Fall Kite Event	In Store Sales	Majectic Beaut	87.79	+
2020-06-12	Jun	24	Festival of Flight	Web Site Sales	Sunshine	38.77	-
2020-08-12	Aug	33	Fall Kite Event	In Store Sales	Sunset	45.98	+
2020-08-23	Aug	35	Fall Kite Event	In Store Sales	Sunbell	48.35	+
2020-09-01	Sep	36	None	In Store Sales	FlatTop	110.05	+
2020-06-26	Jun	26	Festival of Flight	Web Site Sales	Carlota	371.34	-
2020-06-16	Jun	25	Festival of Flight	Web Site Sales	Bellen	46.18	-
2020-09-20	Sep	39	None	Web Site Sales	Carlota	23.36	+
2020-05-10	May	20	None	Web Site Sales	Sunbell	25.16	-
2020-06-19	Jun	25	Festival of Flight	Web Site Sales	Bellen	69.37	-
2020-06-10	Jun	24	Festival of Flight	Web Site Sales	Carlota	523.21	-
2020-08-23	Aug	35	Fall Kite Event	Web Site Sales	Carlota	46.6	+
2020-08-26	Aug	35	Fall Kite Event	In Store Sales	Sunshine	38.11	+
2020-06-11	Jun	24	Festival of Flight	In Store Sales	Carlota	23.76	-
2020-09-26	Sep	39	None	Web Site Sales	Quad	198.15	+
2020-07-17	Jul	29	None	E-mail Coupon	Carlota	46.48	+
2020-07-13	Jul	29	None	Web Site Sales	Sunbell	388.15	-
2020-06-29	Jun	27	None	In Store Sales	Quad	549.99	-
2020-08-08	Aug	32	Fall Kite Event	In Store Sales	Sunset	24.19	+
2020-08-07	Aug	32	Fall Kite Event	In Store Sales	Bellen	23.37	+
2020-08-26	Aug	35	Fall Kite Event	In Store Sales	Carlota	46.13	+
2020-08-03	Aug	32	Fall Kite Event	E-mail Coupon	Sunshine	40.33	+
2020-08-03	Aug	32	Fall Kite Event	In Store Sales	Sunbell	72.47	+
2020-06-23	Jun	26	Festival of Flight	In Store Sales	Sunshine	40.3	-
2020-08-03	Aug	32	Fall Kite Event	In Store Sales	Quad	99.78	+
2020-08-03	Aug	32	Fall Kite Event	Web Site Sales	Sunset	24.62	+
2020-08-07	Aug	32	Fall Kite Event	In Store Sales	Quad	96.01	+
2020-05-31	May	23	Festival of Flight	Web Site Sales	Sunbell	48.77	-
2020-06-01	Jun	23	Festival of Flight	Web Site Sales	Majectic Beaut	90.47	-
2020-06-13	Jun	24	Festival of Flight	In Store Sales	Quad	165.62	-
2020-08-14	Aug	33	Fall Kite Event	In Store Sales	Sunshine	38.37	+
2020-06-24	Jun	26	Festival of Flight	In Store Sales	Sunshine	20.84	-
2020-06-02	Jun	23	Festival of Flight	Web Site Sales	Carlota	110.85	-
2020-09-17	Sep	38	None	Web Site Sales	Carlota	69.32	+
2020-06-24	Jun	26	Festival of Flight	E-mail Coupon	Sunset	71.7	-
2020-08-22	Aug	34	Fall Kite Event	E-mail Coupon	Quad	68.46	+
2020-06-20	Jun	25	Festival of Flight	Web Site Sales	Carlota	23.11	-
2020-06-12	Jun	24	Festival of Flight	Web Site Sales	Sunshine	417.42	-
2020-08-15	Aug	33	Fall Kite Event	In Store Sales	Sunshine	20.8	+
2020-06-14	Jun	25	Festival of Flight	Web Site Sales	Quad	297.15	-
2020-06-09	Jun	24	Festival of Flight	E-mail Coupon	Aspen	42.23	-
2020-08-21	Aug	34	Fall Kite Event	Web Site Sales	Sunbell	50.1	+
2020-06-18	Jun	25	Festival of Flight	In Store Sales	Quad	34.63	-
2020-08-15	Aug	33	Fall Kite Event	Web Site Sales	Quad	66.89	+
2020-06-02	Jun	23	Festival of Flight	E-mail Coupon	FlatTop	55.49	-
2020-08-22	Aug	34	Fall Kite Event	Web Site Sales	Bellen	69.77	+
2020-06-26	Jun	26	Festival of Flight	In Store Sales	Quad	34.45	-
2020-07-01	Jul	27	None	Web Site Sales	Sunset	24.59	-
2020-09-02	Sep	36	None	In Store Sales	Doublers	160.03	+
2020-05-22	May	21	None	Web Site Sales	V-Rang	54.49	-
2020-06-18	Jun	25	Festival of Flight	Web Site Sales	Quad	66.36	-
2020-08-28	Aug	35	Fall Kite Event	Web Site Sales	Crested Beaut	75.16	+
2020-08-29	Aug	35	Fall Kite Event	In Store Sales	Sunshine	38.64	+
2020-08-29	Aug	35	Fall Kite Event	In Store Sales	Quad	64.87	+
2020-06-07	Jun	24	Festival of Flight	Web Site Sales	Bellen	46.19	-
2020-05-30	May	22	None	E-mail Coupon	Bellen	23.77	-
2020-06-04	Jun	23	Festival of Flight	In Store Sales	Sunset	47.59	-
2020-06-12	Jun	24	Festival of Flight	Web Site Sales	Sunshine	20.73	-
2020-08-15	Aug	33	Fall Kite Event	In Store Sales	Bellen	46.73	+
2020-08-03	Aug	32	Fall Kite Event	Web Site Sales	Aspen	76.31	+
2020-06-10	Jun	24	Festival of Flight	Web Site Sales	Bellen	69.46	-
2020-07-23	Jul	30	None	In Store Sales	Sunbell	75.3	+
2020-08-02	Aug	32	Fall Kite Event	In Store Sales	Aspen	80.41	+
2020-08-31	Aug	36	None	Web Site Sales	FlatTop	55.04	+
2020-08-10	Aug	33	Fall Kite Event	In Store Sales	Sunshine	20.34	+
2020-09-30	Sep	40	None	Web Site Sales	Sunbell	23.73	+
2020-08-17	Aug	34	Fall Kite Event	In Store Sales	Quad	596.19	+
2020-06-07	Jun	24	Festival of Flight	E-mail Coupon	Sunset	94.91	-
2020-08-17	Aug	34	Fall Kite Event	In Store Sales	Bellen	23.64	+
2020-06-01	Jun	23	Festival of Flight	Web Site Sales	Sunbell	69.81	-
2020-05-31	May	23	Festival of Flight	Web Site Sales	Quad	34.78	-
2020-08-21	Aug	34	Fall Kite Event	E-mail Coupon	Quad	66.09	+
2020-08-24	Aug	35	Fall Kite Event	E-mail Coupon	Bellen	414.52	+
2020-06-18	Jun	25	Festival of Flight	In Store Sales	Quad	34.2	-
2020-08-15	Aug	33	Fall Kite Event	In Store Sales	Quad	68.84	+
2020-05-09	May	19	None	E-mail Coupon	Crested Beaut	25.81	-
2020-06-30	Jun	27	None	In Store Sales	Sunbell	48.34	-
2020-08-15	Aug	33	Fall Kite Event	Web Site Sales	Bellen	46.23	+
2020-08-29	Aug	35	Fall Kite Event	E-mail Coupon	Bellen	69.28	+
2020-08-02	Aug	32	Fall Kite Event	In Store Sales	Crested Beaut	50.36	+
2020-08-06	Aug	32	Fall Kite Event	In Store Sales	Quad	33.58	+
2020-08-25	Aug	35	Fall Kite Event	In Store Sales	Bellen	230.45	+
2020-08-14	Aug	33	Fall Kite Event	E-mail Coupon	Carlota	23.5	+
2020-06-24	Jun	26	Festival of Flight	Web Site Sales	Crested Beaut	50.77	-
2020-06-27	Jun	26	Festival of Flight	Web Site Sales	Doublers	240.11	-
2020-06-02	Jun	23	Festival of Flight	Web Site Sales	Quad	99.47	-
2020-06-18	Jun	25	Festival of Flight	Web Site Sales	Sunset	47.94	-
2020-06-03	Jun	23	Festival of Flight	In Store Sales	Quad	99.69	-
2020-07-01	Jul	27	None	Web Site Sales	Quad	102.69	-
2020-08-19	Aug	34	Fall Kite Event	Web Site Sales	Sunset	94.99	+
2020-06-21	Jun	26	Festival of Flight	Web Site Sales	Sunbell	25.38	-
2020-06-07	Jun	24	Festival of Flight	Web Site Sales	Sunbell	48.84	-
2020-08-09	Aug	33	Fall Kite Event	In Store Sales	Crested Beaut	523.94	+
2020-08-06	Aug	32	Fall Kite Event	In Store Sales	Bellen	69.95	+
2020-06-11	Jun	24	Festival of Flight	In Store Sales	Aspen	40.26	-
2020-08-06	Aug	32	Fall Kite Event	Web Site Sales	Sunbell	72.5	+
2020-08-23	Aug	35	Fall Kite Event	In Store Sales	Aspen	38.69	+
2020-08-16	Aug	34	Fall Kite Event	Web Site Sales	Sunbell	546.23	+
2020-06-19	Jun	25	Festival of Flight	Web Site Sales	Crested Beaut	48.23	-
2020-08-23	Aug	35	Fall Kite Event	In Store Sales	Majectic Beaut	87.14	+
2020-08-15	Aug	33	Fall Kite Event	In Store Sales	FlatTop	302.06	+
2020-06-14	Jun	25	Festival of Flight	Web Site Sales	Doublers	160.25	-
2020-07-02	Jul	27	None	E-mail Coupon	Majectic Beaut	232.87	-
2020-08-24	Aug	35	Fall Kite Event	In Store Sales	Majectic Beaut	60.94	+
2020-09-14	Sep	38	None	Web Site Sales	Sunbell	75.8	+
2020-08-13	Aug	33	Fall Kite Event	Web Site Sales	Sunshine	20.4	+
2020-09-13	Sep	38	None	Web Site Sales	Sunbell	46.13	+
2020-09-26	Sep	39	None	Web Site Sales	Sunbell	48.27	+
2020-05-29	May	22	None	In Store Sales	Bellen	23.46	-
2020-08-05	Aug	32	Fall Kite Event	Web Site Sales	Majectic Beaut	90.55	+
2020-08-14	Aug	33	Fall Kite Event	In Store Sales	Crested Beaut	48.05	+
2020-05-17	May	21	None	Web Site Sales	FlatTop	55.1	-
2020-05-14	May	20	None	In Store Sales	Sunset	47.12	-
2020-08-14	Aug	33	Fall Kite Event	E-mail Coupon	Quad	99.9	+
2020-05-23	May	21	None	Web Site Sales	Crested Beaut	75.97	-
2020-06-02	Jun	23	Festival of Flight	Web Site Sales	Sunshine	40.72	-
2020-06-28	Jun	27	None	E-mail Coupon	Crested Beaut	75.04	-
2020-08-01	Aug	31	None	Web Site Sales	Sunshine	60.66	+
2020-08-29	Aug	35	Fall Kite Event	In Store Sales	Majectic Beaut	29.51	+
2020-08-11	Aug	33	Fall Kite Event	Web Site Sales	Carlota	46.06	+
2020-08-22	Aug	34	Fall Kite Event	In Store Sales	Carlota	46.43	+
2020-08-10	Aug	33	Fall Kite Event	E-mail Coupon	Crested Beaut	72.44	+
2020-09-27	Sep	40	None	In Store Sales	Sunbell	75.82	+
2020-09-21	Sep	39	None	Web Site Sales	Bellen	66.27	+
2020-08-10	Aug	33	Fall Kite Event	In Store Sales	Sunshine	60.15	+
2020-08-08	Aug	32	Fall Kite Event	Web Site Sales	Majectic Beaut	58.94	+
2020-08-17	Aug	34	Fall Kite Event	In Store Sales	Sunbell	69.37	+
2020-06-17	Jun	25	Festival of Flight	Web Site Sales	V-Rang	18.68	-
2020-06-13	Jun	24	Festival of Flight	E-mail Coupon	Crested Beaut	75.25	-
2020-08-10	Aug	33	Fall Kite Event	Web Site Sales	Quad	34.36	+
2020-09-29	Sep	40	None	Web Site Sales	Quad	99.52	+
2020-09-30	Sep	40	None	Web Site Sales	Sunbell	24.75	+
2020-05-29	May	22	None	Web Site Sales	Sunbell	69.84	-
2020-08-23	Aug	35	Fall Kite Event	Web Site Sales	Majectic Beaut	90.94	+
2020-06-02	Jun	23	Festival of Flight	E-mail Coupon	Sunshine	20.95	-
2020-05-22	May	21	None	Web Site Sales	Sunshine	20.68	-
2020-06-14	Jun	25	Festival of Flight	In Store Sales	Sunset	68.73	-
2020-08-31	Aug	36	None	Web Site Sales	Sunbell	456.63	+
2020-08-21	Aug	34	Fall Kite Event	In Store Sales	Quad	102.35	+
2020-08-08	Aug	32	Fall Kite Event	In Store Sales	Sunbell	23.82	+
2020-06-05	Jun	23	Festival of Flight	Web Site Sales	Quad	66.35	-
2020-09-22	Sep	39	None	Web Site Sales	Quad	68.31	+
2020-08-09	Aug	33	Fall Kite Event	In Store Sales	Sunbell	75.11	+
2020-08-04	Aug	32	Fall Kite Event	Web Site Sales	Quad	68.13	+
2020-08-03	Aug	32	Fall Kite Event	In Store Sales	Quad	33.06	+
2020-08-07	Aug	32	Fall Kite Event	Web Site Sales	Sunbell	24.11	+
2020-08-03	Aug	32	Fall Kite Event	In Store Sales	Sunset	47.02	+
2020-08-29	Aug	35	Fall Kite Event	Web Site Sales	Aspen	38.88	+
2020-08-17	Aug	34	Fall Kite Event	E-mail Coupon	Sunset	424.33	+
2020-05-11	May	20	None	Web Site Sales	Sunshine	40.93	-
2020-08-28	Aug	35	Fall Kite Event	In Store Sales	Crested Beaut	48.24	+
2020-06-26	Jun	26	Festival of Flight	Web Site Sales	Quad	102.29	-
2020-09-26	Sep	39	None	Web Site Sales	Carlota	92.2	+
2020-06-23	Jun	26	Festival of Flight	Web Site Sales	Carlota	46.33	-
2020-08-20	Aug	34	Fall Kite Event	In Store Sales	Sunshine	40.55	+
2020-08-19	Aug	34	Fall Kite Event	Web Site Sales	Quad	66.57	+
2020-05-23	May	21	None	In Store Sales	Crested Beaut	72.52	-
2020-08-26	Aug	35	Fall Kite Event	Web Site Sales	Quad	66.85	+
2020-06-09	Jun	24	Festival of Flight	In Store Sales	Sunset	47.86	-
2020-05-24	May	22	None	E-mail Coupon	Doublers	160.63	-
2020-08-21	Aug	34	Fall Kite Event	E-mail Coupon	Sunbell	75.06	+
2020-08-13	Aug	33	Fall Kite Event	Web Site Sales	Quad	66.45	+
2020-06-21	Jun	26	Festival of Flight	Web Site Sales	Carlota	23.85	-
2020-08-12	Aug	33	Fall Kite Event	Web Site Sales	Carlota	23.49	+
2020-08-18	Aug	34	Fall Kite Event	In Store Sales	Sunbell	72.64	+
2020-08-04	Aug	32	Fall Kite Event	In Store Sales	Doublers	320.73	+
2020-05-13	May	20	None	E-mail Coupon	Sunbell	48.58	-
2020-08-26	Aug	35	Fall Kite Event	In Store Sales	Bellen	23.35	+
2020-08-21	Aug	34	Fall Kite Event	E-mail Coupon	Quad	99.1	+
2020-08-29	Aug	35	Fall Kite Event	In Store Sales	Bellen	46.34	+
2020-06-27	Jun	26	Festival of Flight	In Store Sales	Quad	68.2	-
2020-07-04	Jul	27	None	Web Site Sales	Doublers	160.19	-
2020-08-27	Aug	35	Fall Kite Event	E-mail Coupon	Quad	34.95	+
2020-08-31	Aug	36	None	In Store Sales	Sunshine	20.39	+
2020-06-14	Jun	25	Festival of Flight	Web Site Sales	Quad	549.31	-
2020-07-25	Jul	30	None	Web Site Sales	Doublers	240.27	+
2020-06-20	Jun	25	Festival of Flight	Web Site Sales	Carlota	69.11	-
2020-07-26	Jul	31	None	In Store Sales	Carlota	44.59	+
2020-08-24	Aug	35	Fall Kite Event	In Store Sales	Quad	68.65	+
2020-06-02	Jun	23	Festival of Flight	Web Site Sales	Sunbell	24.83	-
2020-06-07	Jun	24	Festival of Flight	Web Site Sales	Majectic Beaut	28.88	-
2020-08-03	Aug	32	Fall Kite Event	Web Site Sales	Majectic Beaut	87.73	+
2020-08-28	Aug	35	Fall Kite Event	In Store Sales	Aspen	42.53	+
2020-05-28	May	22	None	Web Site Sales	Doublers	240.01	-
2020-08-11	Aug	33	Fall Kite Event	In Store Sales	Sunshine	40.41	+
2020-08-21	Aug	34	Fall Kite Event	Web Site Sales	Aspen	38.68	+
2020-08-11	Aug	33	Fall Kite Event	In Store Sales	Sunbell	46.17	+
2020-08-24	Aug	35	Fall Kite Event	Web Site Sales	Bellen	22.7	+
2020-08-12	Aug	33	Fall Kite Event	In Store Sales	Aspen	60.17	+
2020-09-16	Sep	38	None	In Store Sales	Quad	99.79	+
2020-06-03	Jun	23	Festival of Flight	Web Site Sales	Sunbell	24.1	-
2020-08-24	Aug	35	Fall Kite Event	In Store Sales	Carlota	46.93	+
2020-08-07	Aug	32	Fall Kite Event	In Store Sales	Sunshine	100.09	+
2020-05-19	May	21	None	In Store Sales	Bellen	66.88	-
2020-05-12	May	20	None	Web Site Sales	Quad	34.71	-
2020-08-05	Aug	32	Fall Kite Event	In Store Sales	Sunset	71.4	+
2020-06-29	Jun	27	None	Web Site Sales	V-Rang	36.27	-
2020-07-16	Jul	29	None	In Store Sales	Sunbell	75.9
2020-06-20	Jun	25	Festival of Flight	Web Site Sales	Sunshine	40.99	-
2020-05-25	May	22	None	Web Site Sales	Carlota	46.06	-
2020-06-09	Jun	24	Festival of Flight	Web Site Sales	Quad	66.27	-
2020-07-24	Jul	30	None	Web Site Sales	Crested Beaut	72.66	+
2020-06-11	Jun	24	Festival of Flight	E-mail Coupon	Quad	170.23	-
2020-08-02	Aug	32	Fall Kite Event	Web Site Sales	Doublers	160.79	+
2020-08-15	Aug	33	Fall Kite Event	In Store Sales	Sunbell	69.88	+
2020-08-10	Aug	33	Fall Kite Event	Web Site Sales	Majectic Beaut	29.03	+
2020-08-18	Aug	34	Fall Kite Event	In Store Sales	Sunbell	48.12	+
2020-06-28	Jun	27	None	Web Site Sales	Majectic Beaut	60.99	-
2020-08-22	Aug	34	Fall Kite Event	In Store Sales	Quad	96.19	+
2020-08-02	Aug	32	Fall Kite Event	Web Site Sales	Quad	99.33	+
2020-05-12	May	20	None	Web Site Sales	Aspen	63.09	-
2020-08-28	Aug	35	Fall Kite Event	Web Site Sales	Sunshine	60.02	+
2020-08-06	Aug	32	Fall Kite Event	In Store Sales	V-Rang	19.47	+
2020-06-03	Jun	23	Festival of Flight	Web Site Sales	Carlota	414.97	-
2020-06-15	Jun	25	Festival of Flight	Web Site Sales	Bellen	46.07	-
2020-06-09	Jun	24	Festival of Flight	In Store Sales	Majectic Beaut	399.27	-
2020-06-14	Jun	25	Festival of Flight	Web Site Sales	Majectic Beaut	120.5	-
2020-08-04	Aug	32	Fall Kite Event	Web Site Sales	Bellen	46.03	+
2020-06-19	Jun	25	Festival of Flight	In Store Sales	Sunshine	57.39	-
2020-05-05	May	19	None	E-mail Coupon	Bellen	69.67	-
2020-06-06	Jun	23	Festival of Flight	In Store Sales	Carlota	46.21	-
2020-08-08	Aug	32	Fall Kite Event	In Store Sales	Bellen	46.46	+
2020-08-15	Aug	33	Fall Kite Event	E-mail Coupon	Carlota	23.13	+
2020-08-20	Aug	34	Fall Kite Event	In Store Sales	Bellen	46.51	+
2020-06-04	Jun	23	Festival of Flight	E-mail Coupon	Aspen	20.56	-
2020-07-30	Jul	31	None	Web Site Sales	Sunset	71.09	+
2020-08-07	Aug	32	Fall Kite Event	In Store Sales	Crested Beaut	72.19	+
2020-08-04	Aug	32	Fall Kite Event	Web Site Sales	Sunbell	72.67	+
2020-08-03	Aug	32	Fall Kite Event	In Store Sales	FlatTop	27.27	+
2020-06-24	Jun	26	Festival of Flight	Web Site Sales	Sunshine	60.59	-
2020-06-10	Jun	24	Festival of Flight	Web Site Sales	Bellen	23.48	-
2020-08-26	Aug	35	Fall Kite Event	Web Site Sales	Majectic Beaut	579.64	+
2020-08-09	Aug	33	Fall Kite Event	In Store Sales	Carlota	23.77	+
2020-09-19	Sep	38	None	Web Site Sales	Carlota	66.06	+
2020-08-05	Aug	32	Fall Kite Event	In Store Sales	Carlota	334.32	+
2020-06-26	Jun	26	Festival of Flight	Web Site Sales	Doublers	152.08	-
2020-06-15	Jun	25	Festival of Flight	In Store Sales	Quad	66.45	-
2020-08-16	Aug	34	Fall Kite Event	Web Site Sales	Bellen	23.97	+
2020-08-07	Aug	32	Fall Kite Event	In Store Sales	Carlota	66.71	+
2020-09-24	Sep	39	None	In Store Sales	Quad	711.07	+
2020-05-10	May	20	None	Web Site Sales	Quad	68.1	-
2020-06-28	Jun	27	None	Web Site Sales	Majectic Beaut	90.4	-
2020-07-10	Jul	28	None	In Store Sales	Quad	68.43	-
2020-07-22	Jul	30	None	Web Site Sales	Sunbell	75.88	+
2020-08-07	Aug	32	Fall Kite Event	In Store Sales	Sunbell	100.81	+
2020-08-06	Aug	32	Fall Kite Event	Web Site Sales	Majectic Beaut	58.45	+
2020-06-07	Jun	24	Festival of Flight	Web Site Sales	Sunshine	20.72	-
2020-08-07	Aug	32	Fall Kite Event	Web Site Sales	Aspen	40.53	+
2020-05-19	May	21	None	In Store Sales	Majectic Beaut	87.67	-
2020-06-08	Jun	24	Festival of Flight	Web Site Sales	Quad	102.13	-
2020-06-28	Jun	27	None	In Store Sales	Sunset	513.49	-
2020-06-21	Jun	26	Festival of Flight	Web Site Sales	Majectic Beaut	28.03	-
2020-08-25	Aug	35	Fall Kite Event	In Store Sales	Bellen	69	+
2020-08-01	Aug	31	None	Web Site Sales	Majectic Beaut	661.04	+
2020-08-30	Aug	36	None	In Store Sales	Bellen	23.67	+
2020-06-16	Jun	25	Festival of Flight	Web Site Sales	Bellen	46.56	-
2020-06-08	Jun	24	Festival of Flight	In Store Sales	Bellen	23.9	-
2020-08-09	Aug	33	Fall Kite Event	In Store Sales	Doublers	160.35	+
2020-06-25	Jun	26	Festival of Flight	Web Site Sales	Doublers	240.49	-
2020-06-19	Jun	25	Festival of Flight	E-mail Coupon	Carlota	46.12	-
2020-08-18	Aug	34	Fall Kite Event	In Store Sales	Majectic Beaut	29.79	+
2020-08-25	Aug	35	Fall Kite Event	Web Site Sales	Doublers	240.57	+
2020-06-07	Jun	24	Festival of Flight	In Store Sales	Sunshine	40.66	-
2020-06-06	Jun	23	Festival of Flight	In Store Sales	Sunshine	60.15	-
2020-08-14	Aug	33	Fall Kite Event	In Store Sales	Doublers	240.69	+
2020-06-16	Jun	25	Festival of Flight	In Store Sales	Carlota	46.89	-
2020-08-24	Aug	35	Fall Kite Event	In Store Sales	Sunshine	20.39	+
2020-08-03	Aug	32	Fall Kite Event	In Store Sales	Quad	66.39	+
2020-08-17	Aug	34	Fall Kite Event	In Store Sales	Quad	96.01	+
2020-08-21	Aug	34	Fall Kite Event	Web Site Sales	Carlota	46.03	+
2020-06-04	Jun	23	Festival of Flight	Web Site Sales	Crested Beaut	25.91	-
2020-06-06	Jun	23	Festival of Flight	E-mail Coupon	Carlota	305.52	-
2020-06-23	Jun	26	Festival of Flight	Web Site Sales	Quad	198.99	-
2020-08-08	Aug	32	Fall Kite Event	Web Site Sales	Bellen	523.39	+
2020-06-08	Jun	24	Festival of Flight	In Store Sales	Crested Beaut	50.31	-
2020-05-05	May	19	None	Web Site Sales	Sunset	514.02	-
2020-08-12	Aug	33	Fall Kite Event	In Store Sales	Majectic Beaut	58.12	+
2020-09-22	Sep	39	None	E-mail Coupon	Sunset	23.24	+
2020-06-09	Jun	24	Festival of Flight	Web Site Sales	Bellen	46.76	-
2020-06-27	Jun	26	Festival of Flight	In Store Sales	Bellen	69.53	-
2020-08-22	Aug	34	Fall Kite Event	In Store Sales	Sunshine	60.42	+
2020-06-19	Jun	25	Festival of Flight	Web Site Sales	Crested Beaut	48.29	-
2020-08-19	Aug	34	Fall Kite Event	In Store Sales	V-Rang	38.15	+
2020-08-24	Aug	35	Fall Kite Event	Web Site Sales	Quad	608.86	+
2020-06-16	Jun	25	Festival of Flight	Web Site Sales	Bellen	23.21	-
2020-06-18	Jun	25	Festival of Flight	Web Site Sales	Sunshine	40.42	-
2020-08-24	Aug	35	Fall Kite Event	E-mail Coupon	Carlota	46.45	+
2020-05-23	May	21	None	Web Site Sales	Quad	34.47	-
2020-06-25	Jun	26	Festival of Flight	Web Site Sales	Majectic Beaut	58.2	-
2020-07-14	Jul	29	None	In Store Sales	Sunset	363.9	-
2020-06-20	Jun	25	Festival of Flight	Web Site Sales	Quad	66.46	-
2020-06-17	Jun	25	Festival of Flight	In Store Sales	Carlota	46.2	-
2020-08-11	Aug	33	Fall Kite Event	In Store Sales	Sunshine	20.7	+
2020-09-20	Sep	39	None	Web Site Sales	Sunbell	48.29	+
2020-08-28	Aug	35	Fall Kite Event	In Store Sales	Sunshine	379.58	+
2020-08-19	Aug	34	Fall Kite Event	Web Site Sales	Bellen	23.84	+
2020-08-07	Aug	32	Fall Kite Event	In Store Sales	Sunshine	38.62	+
2020-08-19	Aug	34	Fall Kite Event	In Store Sales	Sunset	24.68	+
2020-06-23	Jun	26	Festival of Flight	In Store Sales	Quad	66.98	-
2020-06-30	Jun	27	None	Web Site Sales	Sunbell	50.45	-
2020-05-17	May	21	None	Web Site Sales	Aspen	60.4	-
2020-06-18	Jun	25	Festival of Flight	Web Site Sales	Carlota	46.65	-
2020-08-10	Aug	33	Fall Kite Event	In Store Sales	Sunbell	184.91	+
2020-06-12	Jun	24	Festival of Flight	In Store Sales	Carlota	69.7	-
2020-06-02	Jun	23	Festival of Flight	Web Site Sales	Bellen	46.06	-
2020-07-13	Jul	29	None	Web Site Sales	Carlota	22.79	-
2020-08-12	Aug	33	Fall Kite Event	In Store Sales	Quad	99.38	+
2020-06-15	Jun	25	Festival of Flight	In Store Sales	Carlota	23.61	-
2020-06-15	Jun	25	Festival of Flight	In Store Sales	Quad	102.39	-
2020-06-08	Jun	24	Festival of Flight	E-mail Coupon	Aspen	80.18	-
2020-06-10	Jun	24	Festival of Flight	Web Site Sales	Sunshine	40.35	-
2020-06-27	Jun	26	Festival of Flight	Web Site Sales	Carlota	436	-
2020-07-16	Jul	29	None	Web Site Sales	Aspen	60.23
2020-08-26	Aug	35	Fall Kite Event	Web Site Sales	Doublers	228.56	+
2020-08-27	Aug	35	Fall Kite Event	In Store Sales	Sunbell	48.14	+
2020-08-28	Aug	35	Fall Kite Event	Web Site Sales	Sunshine	40.35	+
2020-06-17	Jun	25	Festival of Flight	In Store Sales	Carlota	69.96	-
2020-08-07	Aug	32	Fall Kite Event	Web Site Sales	Majectic Beaut	58.3	+
2020-08-09	Aug	33	Fall Kite Event	In Store Sales	Quad	132.06	+
2020-06-25	Jun	26	Festival of Flight	In Store Sales	Bellen	92.87	-
2020-05-04	May	19	None	In Store Sales	Sunshine	60.03	-
2020-05-29	May	22	None	In Store Sales	Sunset	71.84	-
2020-06-01	Jun	23	Festival of Flight	Web Site Sales	Crested Beaut	24.49	-
2020-08-15	Aug	33	Fall Kite Event	Web Site Sales	Sunbell	125.78	+
2020-08-12	Aug	33	Fall Kite Event	In Store Sales	Sunbell	23.92	+
2020-06-09	Jun	24	Festival of Flight	Web Site Sales	Carlota	46.42	-
2020-06-30	Jun	27	None	Web Site Sales	Quad	32.96	-
2020-07-14	Jul	29	None	Web Site Sales	Aspen	60.85	-
2020-08-09	Aug	33	Fall Kite Event	In Store Sales	Sunbell	23.13	+
2020-06-29	Jun	27	None	In Store Sales	Crested Beaut	48.51	-
2020-08-20	Aug	34	Fall Kite Event	In Store Sales	Sunbell	75.92	+
2020-09-04	Sep	36	None	Web Site Sales	Sunshine	38.51	+
2020-06-02	Jun	23	Festival of Flight	In Store Sales	Carlota	46.77	-
2020-08-10	Aug	33	Fall Kite Event	In Store Sales	Bellen	92.26	+
2020-08-30	Aug	36	None	In Store Sales	Sunshine	20.78	+
2020-06-13	Jun	24	Festival of Flight	E-mail Coupon	Sunset	71.64	-
2020-06-09	Jun	24	Festival of Flight	Web Site Sales	Bellen	66.82	-
2020-08-02	Aug	32	Fall Kite Event	In Store Sales	Sunshine	60.24	+
2020-06-26	Jun	26	Festival of Flight	Web Site Sales	Majectic Beaut	116.11	-
2020-08-30	Aug	36	None	E-mail Coupon	FlatTop	28.5	+
2020-08-29	Aug	35	Fall Kite Event	In Store Sales	Carlota	69.54	+
2020-05-11	May	20	None	In Store Sales	Bellen	44.77	-
2020-06-10	Jun	24	Festival of Flight	Web Site Sales	Bellen	46.79	-
2020-06-26	Jun	26	Festival of Flight	Web Site Sales	Sunshine	19.5	-
2020-08-23	Aug	35	Fall Kite Event	In Store Sales	Bellen	46.42	+
2020-06-10	Jun	24	Festival of Flight	In Store Sales	Aspen	60.36	-
2020-07-23	Jul	30	None	Web Site Sales	Majectic Beaut	87.89	+
2020-08-17	Aug	34	Fall Kite Event	Web Site Sales	Sunshine	60.19	+
2020-08-29	Aug	35	Fall Kite Event	In Store Sales	Quad	66.76	+
2020-08-10	Aug	33	Fall Kite Event	Web Site Sales	Sunbell	75.96	+
2020-08-15	Aug	33	Fall Kite Event	In Store Sales	Sunshine	38.38	+
2020-08-08	Aug	32	Fall Kite Event	In Store Sales	Sunbell	50.56	+
2020-05-25	May	22	None	Web Site Sales	Carlota	46.8	-
2020-06-17	Jun	25	Festival of Flight	Web Site Sales	Carlota	46.74	-
2020-06-05	Jun	23	Festival of Flight	Web Site Sales	V-Rang	38.09	-
2020-05-19	May	21	None	Web Site Sales	Carlota	23.7	-
2020-08-16	Aug	34	Fall Kite Event	In Store Sales	Carlota	69.17	+
2020-07-01	Jul	27	None	In Store Sales	Sunshine	20.07	-
2020-07-02	Jul	27	None	E-mail Coupon	Sunshine	20.4	-
2020-06-11	Jun	24	Festival of Flight	Web Site Sales	Majectic Beaut	30.14	-
2020-06-27	Jun	26	Festival of Flight	Web Site Sales	Sunshine	60.85	-
2020-09-18	Sep	38	None	Web Site Sales	Carlota	23	+
2020-08-06	Aug	32	Fall Kite Event	E-mail Coupon	Sunshine	20.13	+
2020-08-30	Aug	36	None	Web Site Sales	Crested Beaut	50.15	+
2020-06-20	Jun	25	Festival of Flight	Web Site Sales	Majectic Beaut	58.02	-
2020-09-11	Sep	37	None	Web Site Sales	Sunbell	50.49	+
2020-08-07	Aug	32	Fall Kite Event	In Store Sales	Doublers	240.64	+
2020-06-16	Jun	25	Festival of Flight	Web Site Sales	Sunbell	48.52	-
2020-08-10	Aug	33	Fall Kite Event	In Store Sales	Carlota	46.42	+
2020-09-11	Sep	37	None	In Store Sales	Bellen	46.91	+
2020-08-16	Aug	34	Fall Kite Event	In Store Sales	Quad	33.12	+
2020-06-21	Jun	26	Festival of Flight	Web Site Sales	FlatTop	55.38	-
2020-08-07	Aug	32	Fall Kite Event	E-mail Coupon	Quad	33.01	+
2020-05-21	May	21	None	E-mail Coupon	Sunshine	40.51	-
2020-07-18	Jul	29	None	Web Site Sales	Bellen	46.83	+
2020-06-05	Jun	23	Festival of Flight	Web Site Sales	Quad	64.58	-
2020-06-28	Jun	27	None	In Store Sales	Sunset	23.73	-
2020-07-19	Jul	30	None	Web Site Sales	Quad	533.77	+
2020-08-12	Aug	33	Fall Kite Event	In Store Sales	Quad	66.47	+
2020-08-19	Aug	34	Fall Kite Event	Web Site Sales	Carlota	69.93	+
2020-08-31	Aug	36	None	E-mail Coupon	Sunset	24.29	+
2020-08-16	Aug	34	Fall Kite Event	Web Site Sales	Quad	33.9	+
2020-08-01	Aug	31	None	In Store Sales	Sunset	23.04	+
2020-06-18	Jun	25	Festival of Flight	Web Site Sales	Quad	68.12	-
2020-08-26	Aug	35	Fall Kite Event	In Store Sales	FlatTop	55.47	+
2020-09-21	Sep	39	None	In Store Sales	Aspen	21.78	+
2020-06-06	Jun	23	Festival of Flight	Web Site Sales	Carlota	154.74	-
2020-06-02	Jun	23	Festival of Flight	Web Site Sales	Quad	64.26	-
2020-08-30	Aug	36	None	In Store Sales	Sunbell	72.85	+
2020-08-21	Aug	34	Fall Kite Event	Web Site Sales	Sunshine	20.51	+
2020-06-29	Jun	27	None	Web Site Sales	Majectic Beaut	56.81	-
2020-08-18	Aug	34	Fall Kite Event	Web Site Sales	Carlota	69.49	+
2020-05-04	May	19	None	In Store Sales	Aspen	38.38	-
2020-06-06	Jun	23	Festival of Flight	Web Site Sales	Carlota	46.83	-
2020-08-16	Aug	34	Fall Kite Event	In Store Sales	Sunshine	80.09	+
2020-06-09	Jun	24	Festival of Flight	E-mail Coupon	Majectic Beaut	29.98	-
2020-06-16	Jun	25	Festival of Flight	In Store Sales	Sunshine	40.22	-
2020-06-30	Jun	27	None	In Store Sales	Carlota	69.61	-
2020-05-28	May	22	None	Web Site Sales	Sunbell	75.72	-
2020-08-27	Aug	35	Fall Kite Event	E-mail Coupon	Carlota	44.63	+
2020-06-20	Jun	25	Festival of Flight	Web Site Sales	Quad	66.64	-
2020-08-03	Aug	32	Fall Kite Event	In Store Sales	Quad	102.7	+
2020-06-12	Jun	24	Festival of Flight	Web Site Sales	Majectic Beaut	90.32	-
2020-06-08	Jun	24	Festival of Flight	In Store Sales	Sunshine	20.99	-
2020-05-03	May	19	None	Web Site Sales	Majectic Beaut	523.23	-
2020-08-25	Aug	35	Fall Kite Event	Web Site Sales	Aspen	38.64	+
2020-08-11	Aug	33	Fall Kite Event	In Store Sales	Sunshine	76.41	+
2020-08-21	Aug	34	Fall Kite Event	In Store Sales	Majectic Beaut	29.83	+
2020-06-29	Jun	27	None	Web Site Sales	Sunbell	72.44	-
2020-08-20	Aug	34	Fall Kite Event	Web Site Sales	Doublers	1629.58	+
2020-08-09	Aug	33	Fall Kite Event	E-mail Coupon	Sunshine	60.32	+
2020-08-15	Aug	33	Fall Kite Event	Web Site Sales	V-Rang	36.17	+
2020-06-17	Jun	25	Festival of Flight	In Store Sales	Majectic Beaut	58.4	-
2020-08-03	Aug	32	Fall Kite Event	Web Site Sales	FlatTop	83.71	+
2020-08-09	Aug	33	Fall Kite Event	In Store Sales	V-Rang	235.88	+
2020-08-24	Aug	35	Fall Kite Event	Web Site Sales	Sunset	47.76	+
2020-06-11	Jun	24	Festival of Flight	In Store Sales	Quad	96.87	-
2020-07-04	Jul	27	None	In Store Sales	Sunshine	60.11	-
2020-06-12	Jun	24	Festival of Flight	In Store Sales	Quad	66.43	-
2020-08-26	Aug	35	Fall Kite Event	In Store Sales	Majectic Beaut	29.07	+
2020-08-11	Aug	33	Fall Kite Event	In Store Sales	Sunshine	40.41	+
2020-08-25	Aug	35	Fall Kite Event	Web Site Sales	Quad	66.04	+
2020-08-03	Aug	32	Fall Kite Event	In Store Sales	FlatTop	28.05	+
2020-06-24	Jun	26	Festival of Flight	E-mail Coupon	Sunshine	60.43	-
2020-08-14	Aug	33	Fall Kite Event	In Store Sales	Aspen	63.09	+
2020-08-29	Aug	35	Fall Kite Event	In Store Sales	Sunbell	24.12	+
2020-06-02	Jun	23	Festival of Flight	E-mail Coupon	Bellen	46.11	-
2020-06-14	Jun	25	Festival of Flight	Web Site Sales	Sunset	90.79	-
2020-07-14	Jul	29	None	In Store Sales	Majectic Beaut	60.48	-
2020-05-01	May	18	None	Web Site Sales	Bellen	69.27	-
2020-06-15	Jun	25	Festival of Flight	E-mail Coupon	FlatTop	353.19	-
2020-07-06	Jul	28	None	In Store Sales	Majectic Beaut	56.2	-
2020-07-04	Jul	27	None	Web Site Sales	Sunbell	72.91	-
2020-06-26	Jun	26	Festival of Flight	Web Site Sales	Crested Beaut	23.06	-
2020-06-04	Jun	23	Festival of Flight	Web Site Sales	Sunshine	40.16	-
2020-08-23	Aug	35	Fall Kite Event	E-mail Coupon	Sunshine	40.81	+
2020-08-15	Aug	33	Fall Kite Event	In Store Sales	Carlota	69.27	+
2020-05-11	May	20	None	In Store Sales	Sunshine	38.28	-
2020-06-19	Jun	25	Festival of Flight	Web Site Sales	Carlota	371.36	-
2020-06-03	Jun	23	Festival of Flight	Web Site Sales	V-Rang	36.41	-
2020-06-10	Jun	24	Festival of Flight	In Store Sales	Majectic Beaut	30.96	-
2020-08-27	Aug	35	Fall Kite Event	Web Site Sales	Aspen	60.33	+
2020-07-25	Jul	30	None	Web Site Sales	Bellen	44.83	+
2020-08-21	Aug	34	Fall Kite Event	Web Site Sales	Aspen	21.18	+
2020-06-04	Jun	23	Festival of Flight	Web Site Sales	Quad	64.23	-
2020-08-20	Aug	34	Fall Kite Event	Web Site Sales	Quad	66.1	+
2020-06-13	Jun	24	Festival of Flight	Web Site Sales	Bellen	23.82	-
2020-06-09	Jun	24	Festival of Flight	In Store Sales	Bellen	46.42	-
2020-06-09	Jun	24	Festival of Flight	Web Site Sales	Aspen	60.84	-
2020-06-14	Jun	25	Festival of Flight	Web Site Sales	Carlota	230.77	-
2020-08-17	Aug	34	Fall Kite Event	In Store Sales	Carlota	46.1	+
2020-08-02	Aug	32	Fall Kite Event	In Store Sales	Sunshine	40.31	+
2020-07-30	Jul	31	None	Web Site Sales	Bellen	46.44	+
2020-05-19	May	21	None	In Store Sales	Bellen	69.92	-
2020-08-08	Aug	32	Fall Kite Event	In Store Sales	Quad	99.88	+
2020-07-08	Jul	28	None	Web Site Sales	Quad	102.42	-
2020-05-03	May	19	None	Web Site Sales	Quad	33.2	-
2020-07-12	Jul	29	None	E-mail Coupon	Bellen	23.69	-
2020-06-11	Jun	24	Festival of Flight	Web Site Sales	Carlota	69.89	-
2020-08-11	Aug	33	Fall Kite Event	In Store Sales	Aspen	60.59	+
2020-08-15	Aug	33	Fall Kite Event	In Store Sales	Quad	33.63	+
2020-07-04	Jul	27	None	E-mail Coupon	V-Rang	18.03	-
2020-08-26	Aug	35	Fall Kite Event	In Store Sales	Crested Beaut	50.79	+
2020-08-18	Aug	34	Fall Kite Event	E-mail Coupon	Sunshine	40.17	+
2020-08-17	Aug	34	Fall Kite Event	In Store Sales	Sunshine	60.31	+
2020-07-28	Jul	31	None	Web Site Sales	V-Rang	291.74	+
2020-06-10	Jun	24	Festival of Flight	Web Site Sales	Sunbell	479.83	-
2020-06-04	Jun	23	Festival of Flight	In Store Sales	Bellen	46.96	-
2020-06-25	Jun	26	Festival of Flight	In Store Sales	Bellen	414.39	-
2020-06-16	Jun	25	Festival of Flight	In Store Sales	Sunshine	20.09	-
2020-08-05	Aug	32	Fall Kite Event	In Store Sales	Majectic Beaut	28.05	+
2020-08-27	Aug	35	Fall Kite Event	Web Site Sales	Bellen	69.24	+
2020-06-18	Jun	25	Festival of Flight	Web Site Sales	Bellen	46.02	-
2020-08-12	Aug	33	Fall Kite Event	Web Site Sales	Quad	99.06	+
2020-08-20	Aug	34	Fall Kite Event	In Store Sales	Quad	128.77	+
2020-08-13	Aug	33	Fall Kite Event	In Store Sales	Doublers	80.52	+
2020-06-30	Jun	27	None	E-mail Coupon	Bellen	46.66	-
2020-06-04	Jun	23	Festival of Flight	Web Site Sales	Quad	34.56	-
2020-08-20	Aug	34	Fall Kite Event	In Store Sales	FlatTop	83.26	+
2020-05-11	May	20	None	Web Site Sales	Sunbell	24.98	-
2020-07-31	Jul	31	None	Web Site Sales	Majectic Beaut	29.03	+
2020-08-14	Aug	33	Fall Kite Event	Web Site Sales	Sunshine	57.46	+
2020-06-18	Jun	25	Festival of Flight	Web Site Sales	Sunbell	50.96	-
2020-05-08	May	19	None	Web Site Sales	Crested Beaut	50.94	-
2020-05-16	May	20	None	In Store Sales	Sunshine	80.92	-
2020-07-29	Jul	31	None	In Store Sales	Majectic Beaut	627.74	+
2020-09-06	Sep	37	None	Web Site Sales	Quad	68.6	+
2020-08-18	Aug	34	Fall Kite Event	E-mail Coupon	Majectic Beaut	28.42	+
2020-06-25	Jun	26	Festival of Flight	Web Site Sales	Sunbell	24.63	-
2020-06-26	Jun	26	Festival of Flight	Web Site Sales	Bellen	69.85	-
2020-08-02	Aug	32	Fall Kite Event	In Store Sales	Sunset	357.01	+
2020-08-12	Aug	33	Fall Kite Event	Web Site Sales	Aspen	361.57	+
2020-07-31	Jul	31	None	In Store Sales	Bellen	46.48	+
2020-09-28	Sep	40	None	Web Site Sales	V-Rang	19.42	+
2020-06-22	Jun	26	Festival of Flight	Web Site Sales	Bellen	69.89	-
2020-08-04	Aug	32	Fall Kite Event	Web Site Sales	Majectic Beaut	29.71	+
2020-06-22	Jun	26	Festival of Flight	Web Site Sales	Quad	132.71	-
2020-06-10	Jun	24	Festival of Flight	E-mail Coupon	Carlota	46.05	-
2020-06-25	Jun	26	Festival of Flight	Web Site Sales	Quad	68.14	-
2020-05-07	May	19	None	In Store Sales	Quad	99.54	-
2020-08-31	Aug	36	None	In Store Sales	Quad	99.9	+
2020-06-21	Jun	26	Festival of Flight	Web Site Sales	Sunbell	69.7	-
2020-08-11	Aug	33	Fall Kite Event	In Store Sales	Quad	66.4	+
2020-05-27	May	22	None	E-mail Coupon	Sunshine	80.04	-
2020-08-14	Aug	33	Fall Kite Event	In Store Sales	V-Rang	57.55	+
2020-08-11	Aug	33	Fall Kite Event	Web Site Sales	Bellen	46.61	+
2020-08-14	Aug	33	Fall Kite Event	In Store Sales	Sunshine	20.64	+
2020-08-01	Aug	31	None	In Store Sales	Quad	68.99	+
2020-07-09	Jul	28	None	Web Site Sales	Carlota	69.37	-
2020-07-13	Jul	29	None	Web Site Sales	Doublers	80.55	-
2020-08-07	Aug	32	Fall Kite Event	In Store Sales	FlatTop	80.15	+
2020-06-30	Jun	27	None	Web Site Sales	Aspen	20.86	-
2020-07-08	Jul	28	None	In Store Sales	Sunbell	92.02	-
2020-06-14	Jun	25	Festival of Flight	Web Site Sales	Quad	136.16	-
2020-06-30	Jun	27	None	E-mail Coupon	Sunset	406.37	-
2020-06-30	Jun	27	None	Web Site Sales	Carlota	22.12	-
2020-06-14	Jun	25	Festival of Flight	Web Site Sales	Sunset	94.75	-
2020-06-07	Jun	24	Festival of Flight	Web Site Sales	Quad	99.43	-
2020-07-22	Jul	30	None	E-mail Coupon	Bellen	46.48	+
2020-08-10	Aug	33	Fall Kite Event	In Store Sales	Bellen	23.49	+
2020-06-19	Jun	25	Festival of Flight	In Store Sales	Sunshine	38.98	-
2020-08-26	Aug	35	Fall Kite Event	Web Site Sales	Quad	32.01	+
2020-08-01	Aug	31	None	In Store Sales	FlatTop	496.26	+
2020-08-17	Aug	34	Fall Kite Event	E-mail Coupon	Carlota	69.11	+
2020-06-09	Jun	24	Festival of Flight	In Store Sales	Carlota	46.92	-
2020-06-14	Jun	25	Festival of Flight	Web Site Sales	Sunshine	19.93	-
2020-06-30	Jun	27	None	Web Site Sales	V-Rang	57.54	-
2020-09-02	Sep	36	None	Web Site Sales	Sunshine	160.07	+
2020-09-04	Sep	36	None	E-mail Coupon	Quad	132.12	+
2020-06-29	Jun	27	None	In Store Sales	Sunshine	341.17	-
2020-05-04	May	19	None	Web Site Sales	Sunbell	23.93	-
2020-06-10	Jun	24	Festival of Flight	E-mail Coupon	Crested Beaut	50.36	-
2020-08-18	Aug	34	Fall Kite Event	In Store Sales	Quad	102.49	+
2020-06-16	Jun	25	Festival of Flight	Web Site Sales	Quad	66.41	-
2020-08-17	Aug	34	Fall Kite Event	In Store Sales	Majectic Beaut	28.58	+
2020-08-30	Aug	36	None	Web Site Sales	Sunset	24.26	+
2020-08-03	Aug	32	Fall Kite Event	In Store Sales	Crested Beaut	69.52	+
2020-08-14	Aug	33	Fall Kite Event	Web Site Sales	Sunbell	69.86	+
2020-06-07	Jun	24	Festival of Flight	In Store Sales	FlatTop	28.4	-
2020-08-20	Aug	34	Fall Kite Event	In Store Sales	Aspen	19.69	+
2020-06-17	Jun	25	Festival of Flight	Web Site Sales	V-Rang	38.35	-
2020-08-04	Aug	32	Fall Kite Event	In Store Sales	Aspen	42.8	+
2020-06-24	Jun	26	Festival of Flight	Web Site Sales	Sunbell	48.82	-
2020-06-14	Jun	25	Festival of Flight	In Store Sales	Aspen	57.91	-
2020-08-05	Aug	32	Fall Kite Event	In Store Sales	Aspen	60.43	+
2020-06-11	Jun	24	Festival of Flight	Web Site Sales	Carlota	70	-
2020-07-27	Jul	31	None	Web Site Sales	Sunbell	72.58	+
2020-06-25	Jun	26	Festival of Flight	In Store Sales	Quad	68.63	-
2020-06-22	Jun	26	Festival of Flight	In Store Sales	Bellen	23.17	-
2020-06-28	Jun	27	None	Web Site Sales	V-Rang	57.22	-
2020-06-05	Jun	23	Festival of Flight	Web Site Sales	Sunbell	96.2	-
2020-08-08	Aug	32	Fall Kite Event	In Store Sales	Carlota	69.31	+
2020-06-22	Jun	26	Festival of Flight	In Store Sales	Sunshine	60.43	-
2020-06-19	Jun	25	Festival of Flight	In Store Sales	Doublers	160	-
2020-08-23	Aug	35	Fall Kite Event	In Store Sales	Quad	68.37	+
2020-06-13	Jun	24	Festival of Flight	In Store Sales	FlatTop	28.39	-
2020-06-13	Jun	24	Festival of Flight	E-mail Coupon	FlatTop	80.81	-
2020-07-20	Jul	30	None	In Store Sales	Sunshine	60.74	+
2020-06-02	Jun	23	Festival of Flight	In Store Sales	Sunshine	40.72	-
2020-06-10	Jun	24	Festival of Flight	Web Site Sales	Carlota	23.63	-
2020-06-30	Jun	27	None	Web Site Sales	Quad	132.34	-
2020-06-25	Jun	26	Festival of Flight	Web Site Sales	Doublers	160.32	-
2020-06-21	Jun	26	Festival of Flight	In Store Sales	Quad	96.94	-
2020-06-16	Jun	25	Festival of Flight	E-mail Coupon	Crested Beaut	69.14	-
2020-08-27	Aug	35	Fall Kite Event	In Store Sales	Carlota	46.76	+
2020-08-16	Aug	34	Fall Kite Event	Web Site Sales	Quad	68.98	+
2020-06-02	Jun	23	Festival of Flight	Web Site Sales	Sunbell	100.9	-
2020-08-29	Aug	35	Fall Kite Event	In Store Sales	Bellen	46.46	+
2020-08-05	Aug	32	Fall Kite Event	In Store Sales	Bellen	69.53	+
2020-08-01	Aug	31	None	Web Site Sales	Quad	533.53	+
2020-06-18	Jun	25	Festival of Flight	Web Site Sales	Bellen	46.41	-
2020-08-13	Aug	33	Fall Kite Event	Web Site Sales	Bellen	46.26	+
2020-05-25	May	22	None	Web Site Sales	Crested Beaut	120.58	-
2020-06-04	Jun	23	Festival of Flight	E-mail Coupon	Carlota	46.63	-
2020-06-23	Jun	26	Festival of Flight	E-mail Coupon	Doublers	160.41	-
2020-08-18	Aug	34	Fall Kite Event	E-mail Coupon	Quad	128.77	+
2020-09-16	Sep	38	None	Web Site Sales	Quad	33.89	+
2020-05-03	May	19	None	Web Site Sales	Sunshine	20.48	-
2020-08-20	Aug	34	Fall Kite Event	In Store Sales	Quad	68.6	+
2020-07-21	Jul	30	None	In Store Sales	Sunbell	168.36	+
2020-05-21	May	21	None	In Store Sales	Quad	99.75	-
2020-07-25	Jul	30	None	Web Site Sales	Sunbell	24.32	+
2020-08-12	Aug	33	Fall Kite Event	E-mail Coupon	Majectic Beaut	90.31	+
2020-07-21	Jul	30	None	Web Site Sales	Sunbell	23.7	+
2020-09-22	Sep	39	None	Web Site Sales	Quad	66.59	+
2020-08-22	Aug	34	Fall Kite Event	Web Site Sales	Sunbell	25.01	+
2020-09-14	Sep	38	None	Web Site Sales	Quad	33.48	+
2020-05-11	May	20	None	Web Site Sales	Crested Beaut	48.88	-
2020-08-17	Aug	34	Fall Kite Event	In Store Sales	Quad	66.66	+
2020-06-15	Jun	25	Festival of Flight	Web Site Sales	V-Rang	38.66	-
2020-09-17	Sep	38	None	Web Site Sales	Bellen	46.28	+
2020-05-01	May	18	None	E-mail Coupon	Doublers	78.44	-
2020-06-25	Jun	26	Festival of Flight	Web Site Sales	FlatTop	80.99	-
2020-06-13	Jun	24	Festival of Flight	Web Site Sales	Quad	68.4	-
2020-09-15	Sep	38	None	Web Site Sales	Carlota	92.84	+
2020-08-08	Aug	32	Fall Kite Event	Web Site Sales	Quad	136.28	+
2020-06-13	Jun	24	Festival of Flight	Web Site Sales	Quad	66.4	-
2020-08-25	Aug	35	Fall Kite Event	In Store Sales	Sunshine	19.01	+
2020-07-01	Jul	27	None	Web Site Sales	Crested Beaut	72.96	-
2020-07-26	Jul	31	None	In Store Sales	Bellen	46.81	+
2020-06-06	Jun	23	Festival of Flight	In Store Sales	Aspen	40.93	-
2020-08-17	Aug	34	Fall Kite Event	Web Site Sales	Sunbell	72.83	+
2020-06-21	Jun	26	Festival of Flight	In Store Sales	Sunset	24.73	-
2020-06-21	Jun	26	Festival of Flight	Web Site Sales	Majectic Beaut	112.69	-
2020-08-22	Aug	34	Fall Kite Event	In Store Sales	Quad	68.27	+
2020-08-07	Aug	32	Fall Kite Event	E-mail Coupon	Bellen	44.6	+
2020-08-04	Aug	32	Fall Kite Event	E-mail Coupon	Crested Beaut	72.05	+
2020-06-18	Jun	25	Festival of Flight	In Store Sales	Quad	66.4	-
2020-08-07	Aug	32	Fall Kite Event	In Store Sales	FlatTop	53.25	+
2020-08-31	Aug	36	None	Web Site Sales	Carlota	46.41	+
2020-05-30	May	22	None	E-mail Coupon	Majectic Beaut	58.09	-
2020-06-20	Jun	25	Festival of Flight	E-mail Coupon	Crested Beaut	75.83	-
2020-06-01	Jun	23	Festival of Flight	E-mail Coupon	Bellen	46.56	-
2020-08-25	Aug	35	Fall Kite Event	Web Site Sales	Majectic Beaut	116.59	+
2020-08-28	Aug	35	Fall Kite Event	In Store Sales	FlatTop	28.4	+
2020-08-29	Aug	35	Fall Kite Event	In Store Sales	Carlota	523.75	+
2020-06-17	Jun	25	Festival of Flight	Web Site Sales	Majectic Beaut	84.91	-
2020-06-11	Jun	24	Festival of Flight	Web Site Sales	Carlota	46.03	-
2020-08-13	Aug	33	Fall Kite Event	In Store Sales	Crested Beaut	404.81	+
2020-06-11	Jun	24	Festival of Flight	E-mail Coupon	Sunbell	48.73	-
2020-07-13	Jul	29	None	E-mail Coupon	Sunbell	25.89	-
2020-08-09	Aug	33	Fall Kite Event	Web Site Sales	Bellen	23.14	+
2020-06-24	Jun	26	Festival of Flight	In Store Sales	Carlota	66.36	-
2020-08-25	Aug	35	Fall Kite Event	Web Site Sales	V-Rang	36.28	+
2020-06-01	Jun	23	Festival of Flight	Web Site Sales	Sunset	118.63	-
2020-08-17	Aug	34	Fall Kite Event	In Store Sales	Majectic Beaut	87.53	+
2020-06-08	Jun	24	Festival of Flight	Web Site Sales	Aspen	40.99	-
2020-09-27	Sep	40	None	In Store Sales	Quad	99.79	+
2020-08-08	Aug	32	Fall Kite Event	In Store Sales	Crested Beaut	50.16	+
2020-08-18	Aug	34	Fall Kite Event	Web Site Sales	Aspen	57.47	+
2020-08-16	Aug	34	Fall Kite Event	In Store Sales	Sunbell	24.48	+
2020-08-04	Aug	32	Fall Kite Event	Web Site Sales	Majectic Beaut	58.42	+
2020-08-16	Aug	34	Fall Kite Event	E-mail Coupon	Sunbell	24.93	+
2020-08-25	Aug	35	Fall Kite Event	E-mail Coupon	Sunbell	23.15	+
2020-08-18	Aug	34	Fall Kite Event	In Store Sales	Doublers	234.43	+
2020-06-29	Jun	27	None	Web Site Sales	Sunset	94.96	-
2020-08-05	Aug	32	Fall Kite Event	In Store Sales	Crested Beaut	69.39	+
2020-07-16	Jul	29	None	In Store Sales	Quad	102.68
2020-06-24	Jun	26	Festival of Flight	Web Site Sales	Sunset	23.13	-
2020-06-14	Jun	25	Festival of Flight	In Store Sales	Sunshine	40.2	-
2020-06-25	Jun	26	Festival of Flight	Web Site Sales	Quad	68.86	-
2020-06-23	Jun	26	Festival of Flight	In Store Sales	Sunbell	72.83	-
2020-08-19	Aug	34	Fall Kite Event	In Store Sales	Aspen	63.23	+
2020-07-16	Jul	29	None	In Store Sales	Sunshine	200.3
2020-06-15	Jun	25	Festival of Flight	In Store Sales	Sunbell	46.68	-
2020-06-03	Jun	23	Festival of Flight	In Store Sales	Sunbell	46.76	-
2020-08-20	Aug	34	Fall Kite Event	In Store Sales	Carlota	69.9	+
2020-08-07	Aug	32	Fall Kite Event	In Store Sales	Sunbell	46.68	+
2020-08-03	Aug	32	Fall Kite Event	In Store Sales	Quad	64.23	+
2020-05-13	May	20	None	E-mail Coupon	Carlota	46.17	-
2020-08-25	Aug	35	Fall Kite Event	E-mail Coupon	FlatTop	27.69	+
2020-08-09	Aug	33	Fall Kite Event	E-mail Coupon	FlatTop	55.55	+
2020-09-09	Sep	37	None	E-mail Coupon	FlatTop	83.78	+
2020-08-21	Aug	34	Fall Kite Event	In Store Sales	Sunshine	398.41	+
2020-07-08	Jul	28	None	Web Site Sales	Bellen	88.12	-
2020-06-13	Jun	24	Festival of Flight	In Store Sales	Bellen	46.64	-
2020-07-18	Jul	29	None	In Store Sales	Aspen	60.57	+
2020-08-27	Aug	35	Fall Kite Event	E-mail Coupon	Carlota	22.97	+
2020-06-11	Jun	24	Festival of Flight	Web Site Sales	Sunshine	133.43	-
2020-08-07	Aug	32	Fall Kite Event	E-mail Coupon	Sunshine	20.77	+
2020-08-31	Aug	36	None	In Store Sales	Quad	33.91	+
2020-07-13	Jul	29	None	Web Site Sales	Quad	96.68	-
2020-08-11	Aug	33	Fall Kite Event	In Store Sales	Majectic Beaut	58.23	+
2020-08-17	Aug	34	Fall Kite Event	In Store Sales	V-Rang	36.07	+
2020-06-02	Jun	23	Festival of Flight	Web Site Sales	Sunshine	324.43	-
2020-06-07	Jun	24	Festival of Flight	In Store Sales	Doublers	312.2	-
2020-05-19	May	21	None	In Store Sales	Carlota	44.81	-
2020-08-26	Aug	35	Fall Kite Event	In Store Sales	Bellen	22.71	+
2020-06-13	Jun	24	Festival of Flight	Web Site Sales	Sunbell	25.65	-
2020-05-12	May	20	None	In Store Sales	Quad	68.12	-
2020-06-09	Jun	24	Festival of Flight	Web Site Sales	Quad	33.91	-
2020-09-16	Sep	38	None	E-mail Coupon	Sunbell	48.56	+
2020-08-23	Aug	35	Fall Kite Event	In Store Sales	Quad	33.31	+
2020-06-08	Jun	24	Festival of Flight	In Store Sales	Aspen	40.55	-
2020-08-13	Aug	33	Fall Kite Event	In Store Sales	Aspen	180.99	+
2020-09-16	Sep	38	None	In Store Sales	Bellen	46.96	+
2020-08-18	Aug	34	Fall Kite Event	In Store Sales	Sunbell	72.2	+
2020-09-01	Sep	36	None	In Store Sales	Crested Beaut	25.98	+
2020-06-29	Jun	27	None	E-mail Coupon	Sunset	71.83	-
2020-06-17	Jun	25	Festival of Flight	Web Site Sales	Sunbell	72.12	-
2020-07-15	Jul	29	None	Web Site Sales	Doublers	160.36	-
2020-07-20	Jul	30	None	E-mail Coupon	Crested Beaut	72.63	+
2020-06-21	Jun	26	Festival of Flight	Web Site Sales	Sunshine	20.15	-
2020-08-01	Aug	31	None	Web Site Sales	Crested Beaut	25.32	+
2020-06-01	Jun	23	Festival of Flight	E-mail Coupon	Carlota	46.04	-
2020-08-15	Aug	33	Fall Kite Event	E-mail Coupon	Sunset	24	+
2020-06-11	Jun	24	Festival of Flight	In Store Sales	Sunshine	341.53	-
2020-06-22	Jun	26	Festival of Flight	Web Site Sales	Sunshine	20.79	-
2020-06-24	Jun	26	Festival of Flight	In Store Sales	Aspen	319.83	-
2020-06-22	Jun	26	Festival of Flight	In Store Sales	Quad	33.42	-
2020-06-23	Jun	26	Festival of Flight	In Store Sales	Carlota	46.2	-
2020-06-15	Jun	25	Festival of Flight	Web Site Sales	Quad	99.72	-
2020-06-02	Jun	23	Festival of Flight	In Store Sales	Carlota	46.08	-
2020-08-28	Aug	35	Fall Kite Event	In Store Sales	Sunbell	50.74	+
2020-06-29	Jun	27	None	In Store Sales	Sunshine	80.91	-
2020-08-21	Aug	34	Fall Kite Event	Web Site Sales	Carlota	69.49	+
2020-08-25	Aug	35	Fall Kite Event	In Store Sales	Carlota	501.98	+
2020-06-13	Jun	24	Festival of Flight	Web Site Sales	Sunbell	75.58	-
2020-08-09	Aug	33	Fall Kite Event	In Store Sales	Sunshine	20.76	+
2020-08-18	Aug	34	Fall Kite Event	Web Site Sales	Sunset	47.63	+
2020-08-18	Aug	34	Fall Kite Event	In Store Sales	Sunbell	72.35	+
2020-08-12	Aug	33	Fall Kite Event	Web Site Sales	Sunset	24.48	+
2020-06-14	Jun	25	Festival of Flight	Web Site Sales	Carlota	69.56	-
2020-08-18	Aug	34	Fall Kite Event	In Store Sales	Majectic Beaut	30.02	+
2020-06-02	Jun	23	Festival of Flight	Web Site Sales	Quad	272.19	-
2020-08-18	Aug	34	Fall Kite Event	Web Site Sales	Quad	33.22	+
2020-08-20	Aug	34	Fall Kite Event	In Store Sales	Sunbell	75.99	+
2020-06-18	Jun	25	Festival of Flight	E-mail Coupon	Sunset	71.26	-
2020-06-12	Jun	24	Festival of Flight	Web Site Sales	Bellen	46.42	-
2020-06-22	Jun	26	Festival of Flight	In Store Sales	Quad	34.99	-
2020-08-09	Aug	33	Fall Kite Event	In Store Sales	V-Rang	38.9	+
2020-06-19	Jun	25	Festival of Flight	Web Site Sales	Aspen	40.29	-
2020-06-02	Jun	23	Festival of Flight	Web Site Sales	Sunset	24.8	-
2020-08-01	Aug	31	None	In Store Sales	Sunbell	415.94	+
2020-08-06	Aug	32	Fall Kite Event	In Store Sales	Majectic Beaut	28.44	+
2020-06-04	Jun	23	Festival of Flight	In Store Sales	Bellen	46.69	-
2020-08-19	Aug	34	Fall Kite Event	In Store Sales	Sunbell	25.73	+
2020-06-04	Jun	23	Festival of Flight	Web Site Sales	Sunbell	48.45	-
2020-06-04	Jun	23	Festival of Flight	E-mail Coupon	Sunshine	38.01	-
2020-06-09	Jun	24	Festival of Flight	Web Site Sales	Carlota	46.92	-
2020-06-04	Jun	23	Festival of Flight	Web Site Sales	FlatTop	55.24	-
2020-05-03	May	19	None	In Store Sales	Majectic Beaut	60.46	-
2020-08-21	Aug	34	Fall Kite Event	In Store Sales	Bellen	23.86	+
2020-08-10	Aug	33	Fall Kite Event	In Store Sales	Bellen	46.98	+
2020-07-20	Jul	30	None	Web Site Sales	Quad	64.6	+
2020-08-21	Aug	34	Fall Kite Event	Web Site Sales	Aspen	40.39	+
2020-08-22	Aug	34	Fall Kite Event	In Store Sales	Quad	132.84	+
2020-08-09	Aug	33	Fall Kite Event	Web Site Sales	Sunset	23.43	+
2020-06-04	Jun	23	Festival of Flight	Web Site Sales	Quad	102.39	-
2020-08-28	Aug	35	Fall Kite Event	In Store Sales	Quad	33.28	+
2020-06-28	Jun	27	None	In Store Sales	Doublers	160.41	-
2020-06-11	Jun	24	Festival of Flight	In Store Sales	Sunshine	20.44	-
2020-06-28	Jun	27	None	Web Site Sales	Quad	68.74	-
2020-06-01	Jun	23	Festival of Flight	In Store Sales	Sunbell	75.5	-
2020-06-09	Jun	24	Festival of Flight	Web Site Sales	FlatTop	28.21	-
2020-08-09	Aug	33	Fall Kite Event	E-mail Coupon	Quad	102.96	+
2020-08-09	Aug	33	Fall Kite Event	In Store Sales	Sunshine	40.02	+
2020-06-17	Jun	25	Festival of Flight	In Store Sales	Bellen	69.61	-
2020-05-26	May	22	None	Web Site Sales	Carlota	92.89	-
2020-06-03	Jun	23	Festival of Flight	E-mail Coupon	Sunshine	40.26	-
2020-08-14	Aug	33	Fall Kite Event	In Store Sales	Aspen	40.96	+
2020-06-02	Jun	23	Festival of Flight	Web Site Sales	Sunbell	72.8	-
2020-08-24	Aug	35	Fall Kite Event	In Store Sales	Bellen	283.85	+
2020-05-05	May	19	None	Web Site Sales	Aspen	20.98	-
2020-06-25	Jun	26	Festival of Flight	In Store Sales	Quad	99.44	-
2020-06-07	Jun	24	Festival of Flight	Web Site Sales	Bellen	23.76	-
2020-08-29	Aug	35	Fall Kite Event	E-mail Coupon	Bellen	66.69	+
2020-07-31	Jul	31	None	Web Site Sales	Sunset	469.93	+
2020-06-30	Jun	27	None	Web Site Sales	Bellen	327.75	-
2020-08-27	Aug	35	Fall Kite Event	Web Site Sales	Bellen	46.38	+
2020-08-15	Aug	33	Fall Kite Event	In Store Sales	Sunbell	25.02	+
2020-06-13	Jun	24	Festival of Flight	Web Site Sales	Bellen	262.81	-
2020-08-23	Aug	35	Fall Kite Event	In Store Sales	Bellen	46.27	+
2020-05-08	May	19	None	In Store Sales	Sunset	23.24	-
2020-06-25	Jun	26	Festival of Flight	Web Site Sales	Carlota	46.08	-
2020-08-27	Aug	35	Fall Kite Event	E-mail Coupon	Quad	102.02	+
2020-06-20	Jun	25	Festival of Flight	Web Site Sales	Carlota	23.72	-
2020-06-22	Jun	26	Festival of Flight	Web Site Sales	Bellen	46.37	-
2020-08-19	Aug	34	Fall Kite Event	In Store Sales	Carlota	46.76	+
2020-06-14	Jun	25	Festival of Flight	In Store Sales	Sunset	71.87	-
2020-08-27	Aug	35	Fall Kite Event	In Store Sales	Sunbell	72.51	+
2020-06-02	Jun	23	Festival of Flight	Web Site Sales	Sunshine	20.45	-
2020-05-29	May	22	None	In Store Sales	Majectic Beaut	87.03	-
2020-07-03	Jul	27	None	Web Site Sales	Majectic Beaut	29.32	-
2020-08-11	Aug	33	Fall Kite Event	In Store Sales	Sunshine	19.4	+
2020-06-29	Jun	27	None	Web Site Sales	Carlota	69.73	-
2020-06-16	Jun	25	Festival of Flight	Web Site Sales	FlatTop	80.01	-
2020-06-24	Jun	26	Festival of Flight	E-mail Coupon	Crested Beaut	46.23	-
2020-08-05	Aug	32	Fall Kite Event	In Store Sales	Sunshine	40.41	+
2020-08-27	Aug	35	Fall Kite Event	In Store Sales	Sunshine	40.3	+
2020-08-30	Aug	36	None	In Store Sales	Sunset	94.64	+
2020-06-15	Jun	25	Festival of Flight	In Store Sales	Sunset	68.8	-
2020-08-03	Aug	32	Fall Kite Event	In Store Sales	Bellen	414.19	+
2020-06-23	Jun	26	Festival of Flight	In Store Sales	Quad	64.96	-
2020-06-09	Jun	24	Festival of Flight	In Store Sales	Majectic Beaut	60.08	-
2020-06-25	Jun	26	Festival of Flight	Web Site Sales	Sunbell	96.57	-
2020-08-30	Aug	36	None	In Store Sales	Bellen	480.04	+
2020-07-22	Jul	30	None	In Store Sales	Sunset	47.34	+
2020-05-30	May	22	None	In Store Sales	Sunshine	60.52	-
2020-05-25	May	22	None	Web Site Sales	FlatTop	83.73	-
2020-06-04	Jun	23	Festival of Flight	In Store Sales	Bellen	23.96	-
2020-08-03	Aug	32	Fall Kite Event	In Store Sales	Sunset	45.47	+
2020-06-23	Jun	26	Festival of Flight	Web Site Sales	Quad	99.9	-
2020-08-15	Aug	33	Fall Kite Event	Web Site Sales	Majectic Beaut	58.08	+
2020-08-25	Aug	35	Fall Kite Event	In Store Sales	Crested Beaut	92.98	+
2020-05-24	May	22	None	Web Site Sales	Aspen	40.12	-
2020-06-03	Jun	23	Festival of Flight	E-mail Coupon	Sunset	71.85	-
2020-05-29	May	22	None	Web Site Sales	Aspen	40.13	-
2020-06-18	Jun	25	Festival of Flight	In Store Sales	Crested Beaut	72.27	-
2020-08-15	Aug	33	Fall Kite Event	Web Site Sales	Majectic Beaut	87.88	+
2020-06-02	Jun	23	Festival of Flight	In Store Sales	Majectic Beaut	56.63	-
2020-08-04	Aug	32	Fall Kite Event	Web Site Sales	Quad	69	+
2020-08-13	Aug	33	Fall Kite Event	In Store Sales	Carlota	46.63	+
2020-06-23	Jun	26	Festival of Flight	E-mail Coupon	Sunbell	50.15	-
2020-05-27	May	22	None	E-mail Coupon	Quad	690.75	-
2020-09-20	Sep	39	None	E-mail Coupon	Quad	33.57	+
2020-08-26	Aug	35	Fall Kite Event	In Store Sales	Majectic Beaut	87.35	+
2020-09-17	Sep	38	None	Web Site Sales	Sunbell	24.6	+
2020-07-10	Jul	28	None	In Store Sales	Carlota	69.27	-
2020-06-23	Jun	26	Festival of Flight	Web Site Sales	Majectic Beaut	30.84	-
2020-09-01	Sep	36	None	Web Site Sales	Carlota	44.48	+
2020-06-04	Jun	23	Festival of Flight	Web Site Sales	Majectic Beaut	58.59	-
2020-08-06	Aug	32	Fall Kite Event	In Store Sales	Sunshine	40.05	+
2020-08-07	Aug	32	Fall Kite Event	Web Site Sales	Quad	66.22	+
2020-08-14	Aug	33	Fall Kite Event	In Store Sales	Quad	33.32	+
2020-08-09	Aug	33	Fall Kite Event	In Store Sales	Crested Beaut	25.17	+
2020-08-09	Aug	33	Fall Kite Event	In Store Sales	Quad	33.95	+
2020-08-26	Aug	35	Fall Kite Event	Web Site Sales	Sunshine	284	+
2020-08-30	Aug	36	None	In Store Sales	Sunbell	48.02	+
2020-08-31	Aug	36	None	Web Site Sales	Carlota	46.97	+
2020-08-07	Aug	32	Fall Kite Event	In Store Sales	Aspen	42.99	+
2020-07-18	Jul	29	None	In Store Sales	Sunbell	23.58	+
2020-06-20	Jun	25	Festival of Flight	In Store Sales	Bellen	46.4	-
2020-06-13	Jun	24	Festival of Flight	E-mail Coupon	Quad	68.34	-
2020-06-20	Jun	25	Festival of Flight	Web Site Sales	Sunshine	60.07	-
2020-05-11	May	20	None	Web Site Sales	Sunset	71.83	-
2020-06-02	Jun	23	Festival of Flight	Web Site Sales	Doublers	240.1	-
2020-06-11	Jun	24	Festival of Flight	In Store Sales	Carlota	22.44	-
2020-09-04	Sep	36	None	Web Site Sales	Aspen	42.15	+
2020-06-23	Jun	26	Festival of Flight	In Store Sales	Sunbell	72.52	-
2020-05-03	May	19	None	In Store Sales	Quad	68.26	-
2020-06-23	Jun	26	Festival of Flight	In Store Sales	Quad	32.01	-
2020-05-02	May	18	None	In Store Sales	V-Rang	72.31	-
2020-09-03	Sep	36	None	Web Site Sales	Quad	470.77	+
2020-08-07	Aug	32	Fall Kite Event	In Store Sales	Aspen	57.24	+
2020-07-22	Jul	30	None	Web Site Sales	Quad	66.71	+
2020-06-08	Jun	24	Festival of Flight	In Store Sales	Bellen	69.79	-
2020-09-13	Sep	38	None	Web Site Sales	V-Rang	38.29	+
2020-08-09	Aug	33	Fall Kite Event	In Store Sales	Sunset	47.93	+
2020-06-22	Jun	26	Festival of Flight	Web Site Sales	Sunset	24.43	-
2020-08-13	Aug	33	Fall Kite Event	In Store Sales	Carlota	92.76	+
2020-07-23	Jul	30	None	Web Site Sales	Aspen	63.13	+
2020-08-30	Aug	36	None	In Store Sales	Carlota	69.24	+
2020-06-29	Jun	27	None	Web Site Sales	Doublers	80.29	-
2020-08-30	Aug	36	None	In Store Sales	Bellen	46.12	+
2020-08-01	Aug	31	None	In Store Sales	Bellen	69.86	+
2020-06-12	Jun	24	Festival of Flight	In Store Sales	Bellen	23.11	-
2020-06-08	Jun	24	Festival of Flight	E-mail Coupon	Bellen	46.45	-
2020-08-05	Aug	32	Fall Kite Event	In Store Sales	Quad	132.67	+
2020-08-01	Aug	31	None	E-mail Coupon	V-Rang	18.21	+
2020-08-14	Aug	33	Fall Kite Event	In Store Sales	FlatTop	27.74	+
2020-06-27	Jun	26	Festival of Flight	Web Site Sales	Aspen	63	-
2020-06-01	Jun	23	Festival of Flight	In Store Sales	Sunshine	60.92	-
2020-08-27	Aug	35	Fall Kite Event	In Store Sales	Majectic Beaut	56.24	+
2020-07-14	Jul	29	None	Web Site Sales	Quad	33.38	-
2020-06-05	Jun	23	Festival of Flight	Web Site Sales	Sunset	90.6	-
2020-06-23	Jun	26	Festival of Flight	Web Site Sales	Majectic Beaut	60.79	-
2020-09-22	Sep	39	None	Web Site Sales	Sunshine	60.2	+
2020-06-11	Jun	24	Festival of Flight	E-mail Coupon	Carlota	23.66	-
2020-08-25	Aug	35	Fall Kite Event	In Store Sales	Crested Beaut	24.72	+
2020-06-22	Jun	26	Festival of Flight	In Store Sales	Crested Beaut	100.47	-
2020-06-11	Jun	24	Festival of Flight	In Store Sales	Sunset	47.49	-
2020-08-24	Aug	35	Fall Kite Event	E-mail Coupon	Sunbell	75.48	+
2020-08-02	Aug	32	Fall Kite Event	In Store Sales	Carlota	46.06	+
2020-06-30	Jun	27	None	Web Site Sales	Carlota	414.39	-
2020-06-04	Jun	23	Festival of Flight	In Store Sales	Majectic Beaut	29.66	-
2020-06-24	Jun	26	Festival of Flight	Web Site Sales	FlatTop	28.53	-
2020-08-17	Aug	34	Fall Kite Event	In Store Sales	Sunshine	19.03	+
2020-08-24	Aug	35	Fall Kite Event	In Store Sales	Quad	33.65	+
2020-06-02	Jun	23	Festival of Flight	Web Site Sales	Quad	136.55	-
2020-06-12	Jun	24	Festival of Flight	Web Site Sales	Sunshine	38.06	-
2020-08-18	Aug	34	Fall Kite Event	In Store Sales	Sunbell	72.52	+
2020-08-28	Aug	35	Fall Kite Event	In Store Sales	Sunbell	48.48	+
2020-07-17	Jul	29	None	In Store Sales	Crested Beaut	25.29	+
2020-09-20	Sep	39	None	In Store Sales	Doublers	80.05	+
2020-06-18	Jun	25	Festival of Flight	Web Site Sales	Quad	66.28	-
2020-06-27	Jun	26	Festival of Flight	In Store Sales	Sunset	68.69	-
2020-06-29	Jun	27	None	Web Site Sales	Doublers	560.79	-
2020-08-17	Aug	34	Fall Kite Event	E-mail Coupon	Carlota	23.09	+
2020-09-11	Sep	37	None	In Store Sales	Quad	64.71	+
2020-06-09	Jun	24	Festival of Flight	E-mail Coupon	Carlota	46.35	-
2020-06-16	Jun	25	Festival of Flight	In Store Sales	Bellen	46.98	-
2020-06-27	Jun	26	Festival of Flight	In Store Sales	Majectic Beaut	87.02	-
2020-06-09	Jun	24	Festival of Flight	Web Site Sales	Crested Beaut	75.1	-
2020-08-05	Aug	32	Fall Kite Event	In Store Sales	Aspen	40.62	+
2020-06-17	Jun	25	Festival of Flight	Web Site Sales	Quad	99.85	-
2020-06-22	Jun	26	Festival of Flight	Web Site Sales	Sunset	225.97	-
2020-08-21	Aug	34	Fall Kite Event	Web Site Sales	Bellen	46.73	+
2020-06-15	Jun	25	Festival of Flight	In Store Sales	V-Rang	57.16	-
2020-06-25	Jun	26	Festival of Flight	Web Site Sales	Majectic Beaut	84.71	-
2020-06-21	Jun	26	Festival of Flight	In Store Sales	Bellen	69.1	-
2020-08-23	Aug	35	Fall Kite Event	Web Site Sales	FlatTop	80.28	+
2020-06-24	Jun	26	Festival of Flight	In Store Sales	Carlota	23.35	-
2020-08-18	Aug	34	Fall Kite Event	E-mail Coupon	Bellen	69.05	+
2020-08-14	Aug	33	Fall Kite Event	In Store Sales	Majectic Beaut	90.02	+
2020-08-12	Aug	33	Fall Kite Event	Web Site Sales	Carlota	46.1	+
2020-08-04	Aug	32	Fall Kite Event	In Store Sales	Sunshine	40.34	+
2020-09-17	Sep	38	None	Web Site Sales	Bellen	69.17	+
2020-06-27	Jun	26	Festival of Flight	In Store Sales	V-Rang	18.64	-
2020-08-29	Aug	35	Fall Kite Event	Web Site Sales	Bellen	46.96	+
2020-08-14	Aug	33	Fall Kite Event	In Store Sales	Sunshine	40.7	+
2020-06-14	Jun	25	Festival of Flight	Web Site Sales	Sunshine	40.7	-
2020-07-14	Jul	29	None	Web Site Sales	Quad	102.43	-
2020-09-08	Sep	37	None	In Store Sales	V-Rang	54.38	+
2020-08-06	Aug	32	Fall Kite Event	In Store Sales	Quad	34.82	+
2020-06-16	Jun	25	Festival of Flight	Web Site Sales	Sunset	47.03	-
2020-08-04	Aug	32	Fall Kite Event	In Store Sales	Sunshine	38.76	+
2020-07-04	Jul	27	None	In Store Sales	Quad	68.01	-
2020-08-27	Aug	35	Fall Kite Event	In Store Sales	Crested Beaut	50.33	+
2020-08-23	Aug	35	Fall Kite Event	E-mail Coupon	Quad	132.98	+
2020-06-29	Jun	27	None	Web Site Sales	Bellen	46.1	-
2020-06-10	Jun	24	Festival of Flight	Web Site Sales	Quad	66.93	-
2020-06-06	Jun	23	Festival of Flight	In Store Sales	V-Rang	54.87	-
2020-06-06	Jun	23	Festival of Flight	In Store Sales	Sunbell	25.43	-
2020-06-28	Jun	27	None	Web Site Sales	Sunbell	69.27	-
2020-06-23	Jun	26	Festival of Flight	In Store Sales	Bellen	23.82	-
2020-08-23	Aug	35	Fall Kite Event	In Store Sales	Quad	102.75	+
2020-08-23	Aug	35	Fall Kite Event	Web Site Sales	Quad	34.23	+
2020-06-04	Jun	23	Festival of Flight	Web Site Sales	Sunbell	75.91	-
2020-06-26	Jun	26	Festival of Flight	E-mail Coupon	Sunbell	46.15	-
2020-06-27	Jun	26	Festival of Flight	Web Site Sales	Quad	96.52	-
2020-06-28	Jun	27	None	Web Site Sales	Sunshine	38.51	-
2020-07-06	Jul	28	None	Web Site Sales	Sunshine	60.2	-
2020-08-30	Aug	36	None	In Store Sales	Bellen	23.8	+
2020-07-23	Jul	30	None	Web Site Sales	Majectic Beaut	87.02	+
2020-08-08	Aug	32	Fall Kite Event	Web Site Sales	Carlota	69.62	+
2020-05-05	May	19	None	In Store Sales	Majectic Beaut	116.21	-
2020-06-12	Jun	24	Festival of Flight	E-mail Coupon	Quad	68.21	-
2020-06-03	Jun	23	Festival of Flight	Web Site Sales	Bellen	46.23	-
2020-06-07	Jun	24	Festival of Flight	In Store Sales	FlatTop	53.94	-
2020-06-21	Jun	26	Festival of Flight	Web Site Sales	Sunshine	60.66	-
2020-06-02	Jun	23	Festival of Flight	Web Site Sales	Bellen	69.9	-
2020-06-19	Jun	25	Festival of Flight	Web Site Sales	Sunbell	50.75	-
2020-06-04	Jun	23	Festival of Flight	In Store Sales	Quad	99.3	-
2020-08-11	Aug	33	Fall Kite Event	In Store Sales	Carlota	69.71	+
2020-06-24	Jun	26	Festival of Flight	Web Site Sales	Sunbell	72.2	-
2020-06-09	Jun	24	Festival of Flight	Web Site Sales	Quad	102.32	-
2020-06-09	Jun	24	Festival of Flight	In Store Sales	Crested Beaut	46.4	-
2020-06-27	Jun	26	Festival of Flight	In Store Sales	Sunbell	46.25	-
2020-08-07	Aug	32	Fall Kite Event	E-mail Coupon	Quad	533.23	+
2020-06-05	Jun	23	Festival of Flight	Web Site Sales	Quad	102.77	-
2020-06-28	Jun	27	None	E-mail Coupon	Carlota	44.96	-
2020-06-07	Jun	24	Festival of Flight	Web Site Sales	Aspen	42.5	-
2020-08-05	Aug	32	Fall Kite Event	Web Site Sales	Carlota	22.7	+
2020-08-15	Aug	33	Fall Kite Event	In Store Sales	Bellen	501.12	+
2020-06-04	Jun	23	Festival of Flight	In Store Sales	Bellen	458.34	-
2020-08-04	Aug	32	Fall Kite Event	In Store Sales	Sunbell	25.66	+
2020-09-08	Sep	37	None	Web Site Sales	Sunbell	24.7	+
2020-08-02	Aug	32	Fall Kite Event	In Store Sales	Carlota	23.27	+
2020-06-01	Jun	23	Festival of Flight	In Store Sales	Quad	64.07	-
2020-06-21	Jun	26	Festival of Flight	In Store Sales	Quad	66.5	-
2020-06-22	Jun	26	Festival of Flight	In Store Sales	Quad	66.82	-
2020-09-26	Sep	39	None	In Store Sales	Crested Beaut	75.4	+
2020-08-25	Aug	35	Fall Kite Event	E-mail Coupon	Carlota	23.43	+
2020-08-20	Aug	34	Fall Kite Event	In Store Sales	Sunset	71.92	+
2020-07-31	Jul	31	None	In Store Sales	Sunset	45.1	+
2020-08-08	Aug	32	Fall Kite Event	E-mail Coupon	Carlota	88.83	+
2020-09-09	Sep	37	None	Web Site Sales	Quad	132.11	+
2020-08-15	Aug	33	Fall Kite Event	In Store Sales	Bellen	23.08	+
2020-09-16	Sep	38	None	In Store Sales	Sunbell	23.16	+
2020-08-18	Aug	34	Fall Kite Event	In Store Sales	V-Rang	77	+
2020-08-17	Aug	34	Fall Kite Event	In Store Sales	Carlota	69.24	+
2020-08-27	Aug	35	Fall Kite Event	In Store Sales	Crested Beaut	24.88	+
2020-06-19	Jun	25	Festival of Flight	Web Site Sales	Bellen	92.03	-
2020-08-19	Aug	34	Fall Kite Event	E-mail Coupon	Quad	66.58	+
2020-06-24	Jun	26	Festival of Flight	Web Site Sales	Carlota	92.05	-
2020-08-04	Aug	32	Fall Kite Event	In Store Sales	Majectic Beaut	87.39	+
2020-08-08	Aug	32	Fall Kite Event	Web Site Sales	Quad	66.68	+
2020-08-20	Aug	34	Fall Kite Event	E-mail Coupon	Carlota	46.56	+
2020-06-19	Jun	25	Festival of Flight	In Store Sales	V-Rang	54.93	-
2020-08-05	Aug	32	Fall Kite Event	In Store Sales	Carlota	69.95	+
2020-08-02	Aug	32	Fall Kite Event	Web Site Sales	Crested Beaut	72.17	+
2020-06-02	Jun	23	Festival of Flight	E-mail Coupon	Crested Beaut	46.11	-
2020-08-27	Aug	35	Fall Kite Event	Web Site Sales	Quad	102.25	+
2020-06-04	Jun	23	Festival of Flight	Web Site Sales	Sunshine	60.12	-
2020-06-25	Jun	26	Festival of Flight	E-mail Coupon	Quad	66.65	-
2020-08-29	Aug	35	Fall Kite Event	In Store Sales	Quad	96.89	+
2020-08-17	Aug	34	Fall Kite Event	In Store Sales	Majectic Beaut	58.86	+
2020-09-11	Sep	37	None	Web Site Sales	Quad	64.95	+
2020-07-01	Jul	27	None	In Store Sales	Aspen	21.99	-
2020-06-01	Jun	23	Festival of Flight	Web Site Sales	Carlota	69.42	-
2020-08-15	Aug	33	Fall Kite Event	Web Site Sales	Sunset	45.47	+
2020-06-08	Jun	24	Festival of Flight	Web Site Sales	Aspen	60.53	-
2020-06-29	Jun	27	None	E-mail Coupon	Sunset	47.91	-
2020-08-21	Aug	34	Fall Kite Event	In Store Sales	Aspen	42.12	+
2020-06-14	Jun	25	Festival of Flight	In Store Sales	Bellen	66.71	-
2020-06-16	Jun	25	Festival of Flight	In Store Sales	Bellen	23.54	-
2020-08-25	Aug	35	Fall Kite Event	Web Site Sales	Sunbell	48.62	+
2020-09-19	Sep	38	None	Web Site Sales	Sunset	335.54	+
2020-09-07	Sep	37	None	In Store Sales	Sunshine	60.98	+
2020-08-01	Aug	31	None	In Store Sales	Crested Beaut	50.06	+
2020-06-24	Jun	26	Festival of Flight	Web Site Sales	Carlota	69.79	-
2020-06-30	Jun	27	None	Web Site Sales	Crested Beaut	72.46	-
2020-07-15	Jul	29	None	Web Site Sales	Sunshine	20.22	-
2020-06-22	Jun	26	Festival of Flight	Web Site Sales	Sunshine	200.6	-
2020-08-15	Aug	33	Fall Kite Event	Web Site Sales	Crested Beaut	75.21	+
2020-05-20	May	21	None	Web Site Sales	Carlota	523.05	-
2020-06-21	Jun	26	Festival of Flight	E-mail Coupon	Sunshine	40.67	-
2020-08-07	Aug	32	Fall Kite Event	In Store Sales	Bellen	22.7	+
2020-06-01	Jun	23	Festival of Flight	In Store Sales	Sunbell	96.37	-
2020-06-29	Jun	27	None	In Store Sales	Carlota	44.37	-
2020-08-12	Aug	33	Fall Kite Event	Web Site Sales	FlatTop	83.67	+
2020-08-25	Aug	35	Fall Kite Event	In Store Sales	Bellen	46.13	+
2020-08-24	Aug	35	Fall Kite Event	Web Site Sales	Sunbell	48.38	+
2020-08-12	Aug	33	Fall Kite Event	In Store Sales	Sunset	24.64	+
2020-08-19	Aug	34	Fall Kite Event	Web Site Sales	Sunshine	20.63	+
2020-07-03	Jul	27	None	In Store Sales	FlatTop	53.15	-
2020-08-24	Aug	35	Fall Kite Event	E-mail Coupon	Crested Beaut	24.92	+
2020-08-27	Aug	35	Fall Kite Event	In Store Sales	Sunshine	60.52	+
2020-08-04	Aug	32	Fall Kite Event	Web Site Sales	Carlota	23.69	+
2020-08-01	Aug	31	None	In Store Sales	Crested Beaut	46.73	+
2020-08-25	Aug	35	Fall Kite Event	Web Site Sales	Crested Beaut	24.17	+
2020-08-16	Aug	34	Fall Kite Event	In Store Sales	Sunshine	40.9	+
2020-09-02	Sep	36	None	In Store Sales	V-Rang	36.74	+
2020-08-07	Aug	32	Fall Kite Event	In Store Sales	Bellen	46.13	+
2020-06-29	Jun	27	None	E-mail Coupon	Crested Beaut	48.61	-
2020-06-24	Jun	26	Festival of Flight	In Store Sales	Sunshine	20.59	-
2020-08-01	Aug	31	None	Web Site Sales	Bellen	66.54	+
2020-08-02	Aug	32	Fall Kite Event	In Store Sales	Sunset	68.37	+
2020-06-05	Jun	23	Festival of Flight	In Store Sales	V-Rang	54.7	-
2020-08-30	Aug	36	None	In Store Sales	Quad	66.97	+
2020-06-15	Jun	25	Festival of Flight	Web Site Sales	Aspen	63.42	-
2020-05-18	May	21	None	Web Site Sales	Sunshine	20.91	-
2020-08-07	Aug	32	Fall Kite Event	E-mail Coupon	Sunset	24.21	+
2020-08-04	Aug	32	Fall Kite Event	In Store Sales	Aspen	84.38	+
2020-07-08	Jul	28	None	In Store Sales	Sunset	47.94	-
2020-05-25	May	22	None	Web Site Sales	Majectic Beaut	87.2	-
2020-05-13	May	20	None	In Store Sales	Sunshine	40.75	-
2020-09-09	Sep	37	None	Web Site Sales	Sunshine	246.2	+
2020-06-15	Jun	25	Festival of Flight	Web Site Sales	Doublers	240.26	-
2020-08-25	Aug	35	Fall Kite Event	In Store Sales	Quad	99.9	+
2020-06-01	Jun	23	Festival of Flight	In Store Sales	Quad	68.92	-
2020-06-27	Jun	26	Festival of Flight	Web Site Sales	Crested Beaut	73	-
2020-08-29	Aug	35	Fall Kite Event	Web Site Sales	Sunshine	40.34	+
2020-06-23	Jun	26	Festival of Flight	In Store Sales	Sunset	71.72	-
2020-06-10	Jun	24	Festival of Flight	Web Site Sales	Sunset	71.67	-
2020-05-25	May	22	None	In Store Sales	Carlota	46.43	-
2020-07-26	Jul	31	None	Web Site Sales	Bellen	69.84	+
2020-06-25	Jun	26	Festival of Flight	Web Site Sales	Carlota	69.4	-
2020-08-03	Aug	32	Fall Kite Event	Web Site Sales	Quad	66.34	+
2020-06-04	Jun	23	Festival of Flight	E-mail Coupon	Quad	68.95	-
2020-06-28	Jun	27	None	In Store Sales	Sunshine	38.36	-
2020-08-10	Aug	33	Fall Kite Event	In Store Sales	Bellen	23.91	+
2020-07-08	Jul	28	None	Web Site Sales	Majectic Beaut	58.61	-
2020-06-08	Jun	24	Festival of Flight	Web Site Sales	Majectic Beaut	87.15	-
2020-05-01	May	18	None	Web Site Sales	FlatTop	83.4	-
2020-08-29	Aug	35	Fall Kite Event	In Store Sales	Majectic Beaut	331.02	+
2020-08-28	Aug	35	Fall Kite Event	E-mail Coupon	Quad	96.6	+
2020-06-08	Jun	24	Festival of Flight	E-mail Coupon	Majectic Beaut	58.37	-
2020-06-20	Jun	25	Festival of Flight	Web Site Sales	Bellen	23.78	-
2020-06-28	Jun	27	None	Web Site Sales	FlatTop	277.32	-
2020-06-18	Jun	25	Festival of Flight	Web Site Sales	Quad	33.33	-
2020-06-14	Jun	25	Festival of Flight	Web Site Sales	Sunbell	24.9	-
2020-08-22	Aug	34	Fall Kite Event	Web Site Sales	Bellen	66.78	+
2020-06-13	Jun	24	Festival of Flight	Web Site Sales	FlatTop	27.75	-
2020-06-04	Jun	23	Festival of Flight	Web Site Sales	Bellen	23.48	-
2020-06-13	Jun	24	Festival of Flight	Web Site Sales	Majectic Beaut	28.71	-
2020-08-30	Aug	36	None	Web Site Sales	Sunshine	60.09	+
2020-09-18	Sep	38	None	In Store Sales	Crested Beaut	75.36	+
2020-08-18	Aug	34	Fall Kite Event	E-mail Coupon	Doublers	78.58	+
2020-08-29	Aug	35	Fall Kite Event	In Store Sales	FlatTop	83.37	+
2020-06-02	Jun	23	Festival of Flight	Web Site Sales	Quad	136.15	-
2020-07-24	Jul	30	None	Web Site Sales	Majectic Beaut	29.8	+
2020-08-18	Aug	34	Fall Kite Event	Web Site Sales	Sunshine	38.01	+
2020-06-29	Jun	27	None	Web Site Sales	Bellen	46.46	-
[truncated: 1 more rows]
