# Supplementary material
Source: ML conference proceedings conference paper supplement (https://openreview.net/forum?id=tfyr2zRVoK)
Supplement: supplementary_material [file 9_SummerSales_gt1.xlsx]

## Sheet: Sheet1
Date	Month	Week	Promotion	Sales Channel	Product	Revenue ($)
2020-05-18	May	21	None	Web Site Sales	Sunshine	20.01
2020-07-26	Jul	31	None	In Store Sales	Sunshine	20.88
2020-09-02	Sep	36	None	Web Site Sales	Bellen	23.25
2020-09-01	Sep	36	None	Web Site Sales	Sunset	24.68
2020-05-12	May	20	None	Web Site Sales	Sunbell	24.75
2020-06-10	Jun	24	None	In Store Sales	Majectic Beaut	28.28
2020-07-16	Jul	29	None	Web Site Sales	FlatTop	28.92
2020-07-01	Jul	27	None	In Store Sales	Sunshine	40.76
2020-05-13	May	20	None	Web Site Sales	Carlota	46.1
2020-05-17	May	21	None	In Store Sales	Carlota	46.25
2020-07-29	Jul	31	None	In Store Sales	Carlota	46.85
2020-06-10	Jun	24	None	Web Site Sales	Sunset	47.35
2020-06-14	Jun	25	None	Web Site Sales	Sunbell	48.59
2020-07-03	Jul	27	None	Web Site Sales	Sunbell	50.9
2020-06-28	Jun	27	None	Web Site Sales	Sunshine	60.4
2020-06-04	Jun	23	None	In Store Sales	Quad	66.85
2020-05-21	May	21	None	Web Site Sales	Quad	68.25
2020-06-13	Jun	24	None	In Store Sales	Quad	68.39
2020-06-30	Jun	27	None	Web Site Sales	Carlota	69.85
2020-05-03	May	19	None	In Store Sales	Sunset	71.86
2020-06-02	Jun	23	None	E-mail Coupon	Crested Beaut	75.62
2020-05-18	May	21	None	Web Site Sales	Sunbell	75.91
2020-05-12	May	20	None	Web Site Sales	Doublers	80.95
2020-09-10	Sep	37	None	Web Site Sales	Carlota	89
2020-05-29	May	22	None	In Store Sales	Quad	99
2020-05-15	May	20	None	Web Site Sales	Quad	99.29
2020-09-16	Sep	38	None	In Store Sales	Doublers	160.04
2020-07-29	Jul	31	None	Web Site Sales	Quad	306.04
2020-09-11	Sep	37	None	Web Site Sales	Aspen	479.13
