# Supplementary material
Source: ML conference proceedings conference paper supplement (https://openreview.net/forum?id=tfyr2zRVoK)
Supplement: supplementary_material [file 9_WeeklySales_gt1.xlsx]

## Sheet: Sheet1
Week	Sales	COGS	Week Sales COGS Summary
Week 1	92808	81230.8	Week: Week 1, Sales: 92808, COGS: 81230.8227540488
Week 2	103740	32966.5	Week: Week 2, Sales: 103740, COGS: 32966.5302445238
Week 3	92828	10560.4	Week: Week 3, Sales: 92828, COGS: 10560.3870016105
Week 4	56032	51268.7	Week: Week 4, Sales: 56032, COGS: 51268.6702732669
Week 5	83685	33203.7	Week: Week 5, Sales: 83685, COGS: 33203.6565221954
Week 6	89271	26838.7	Week: Week 6, Sales: 89271, COGS: 26838.6767996522
Week 7	120530	79725.8	Week: Week 7, Sales: 120530, COGS: 79725.7783228259
Week 8	81764	61115.6	Week: Week 8, Sales: 81764, COGS: 61115.5607341919
Week 9	101728	3733.35	Week: Week 9, Sales: 101728, COGS: 3733.34560276964
Week 10	79359	50690.1	Week: Week 10, Sales: 79359, COGS: 50690.0578094836
