# Supplementary material
Source: ML conference proceedings conference paper supplement (https://openreview.net/forum?id=tfyr2zRVoK)
Supplement: supplementary_material [file 10_PricingTable_gt1.xlsx]

## Sheet: Sheet2
Row Labels	Average of Number of Rolls
15	466
16	456
17	453.6
18	389.143
Grand Total	439.2

## Sheet: Sheet1
Date	Day	Number of Rolls	Price	Revenue
2015-09-16		540
2015-09-15		360
2015-09-16		12
2015-09-15		468
2015-09-17		48
2015-09-18		84
2015-09-17		540
2015-09-18		492
2015-09-18		204
2015-09-15		408
2015-09-17		780
2015-09-16		444
2015-09-15		432
2015-09-16		456
2015-09-16		768
2015-09-17		528
2015-09-15		624
2015-09-17		372
2015-09-18		588
2015-09-15		504
2015-09-16		504
2015-09-18		660
2015-09-16		468
2015-09-18		492
2015-09-18		204

## Sheet: Pricing Table
Units From	Units To	Price per Roll (100 feet)
0	143	198
144	288	187
289	577	168
578	999	152
