# Supplementary material
Source: ML conference proceedings conference paper supplement (https://openreview.net/forum?id=tfyr2zRVoK)
Supplement: supplementary_material [file 10_WeeklySales_gt1.xlsx]

## Sheet: Sheet1
Week	Sales	COGS	Profit
Week 1	92808	81230.8	11577.2
Week 2	103740	32966.5	70773.5
Week 3	92828	10560.4	82267.6
Week 4	56032	51268.7	4763.33
Week 5	83685	33203.7	50481.3
Week 6	89271	26838.7	62432.3
Week 7	120530	79725.8	40804.2
Week 8	81764	61115.6	20648.4
Week 9	101728	3733.35	97994.7
Week 10	79359	50690.1	28668.9
