# Supplementary material
Source: ML conference proceedings conference paper supplement (https://openreview.net/forum?id=tfyr2zRVoK)
Supplement: supplementary_material [file 12_EntireShippingCosts_gt1.xlsx]

## Sheet: Sheet1
Customers	Seattle	Milwaukee	Birmingham	Oakland	Shipping Cost to Seattle
Chandler	1447	1830	1686	766	5064.5
Glendale	1405	1870	1715	744	4917.5
Mesa	1440	1816	1702	758	5040
Scottsdale	1435	1818	1706	754	5022.5
Little Rock	2277	743	373	1955	7969.5
Antioch	796	2146	2299	36	2786
Berkeley	795	2165	2319	4	2782.5
Chula Vista	1258	2124	1996	499	4403
Concord	785	2155	2319	25	2747.5
Daly City	813	2183	2329	21	2845.5
Fairfield	759	2129	2339	41	2656.5
Hayward	816	2186	2306	20	2856
Huntington Beach	1162	2063	2034	404	4067
Long Beach	1156	2071	2042	398	4046
Modesto	822	2158	2248	82	2877
Santa Clara	834	2204	2290	44	2919
Sunnyvale	835	2205	2293	44	2922.5
Thousand Oaks	1143	2092	2062	385	4000.5
Vallejo	773	2143	2328	25	2705.5
Aurora	1332	1045	1318	1260	4662
Colorado Springs	1388	1114	1312	1316	4858
Denver	1318	1043	1328	1246	4613
Chicago	2067	93	663	2124	7234.5
Joliet	2052	126	671	2099	7182
Evansville	2254	387	343	2214	7889
Fort Wayne	2233	262	597	2269	7815.5
Cedar Rapids	1832	244	782	1919	6412
Kansas City	1842	576	695	1802	6447
Topeka	1848	630	748	1776	6468
Lexington-Fayette	2406	468	411	2383	8421
Louisville-Jefferson County5	2340	401	363	2317	8190
New Orleans	2617	1016	344	2265	9159.5
Baltimore	2771	800	781	2808	9698.5
Ann Arbor	2314	343	710	2351	8099
Detroit	2352	381	722	2389	8232
St. Paul	1668	332	1069	1970	5838
Kansas City	1840	569	688	1800	6440
St. Louis	2089	375	500	2050	7311.5
Omaha	1659	508	869	1661	5806.5
Henderson	1145	1806	1799	568	4007.5
Reno	738	1964	2267	256	2583
Manchester	3087	1116	1214	3124	10804.5
Elizabeth	2857	886	950	2894	9999.5
Jersey City	2860	889	959	2896	10010
Newark	2852	881	952	2889	9982
New York	2863	892	964	2900	10020.5
Yonkers	2873	902	980	2910	10055.5
Cary	2876	905	543	2829	10066
Durham	2856	885	531	2808	9996
Cincinnati	2327	389	468	2374	8144.5
Cleveland	2417	446	712	2453	8459.5
Norman	2007	892	705	1639	7024.5
Tulsa	2000	773	639	1718	7000
Eugene	278	2173	2494	523	973
Portland	168	2065	2480	629	588
Philadelphia	2832	861	878	2869	9912
Pittsburgh	2535	564	753	2572	8872.5
Providence	3046	1075	1153	3083	10661
Columbia	2835	903	362	2678	9922.5
Sioux Falls	1478	497	1053	1727	5173
Clarksville	2359	561	232	2294	8256.5
Killeen	2091	1156	741	1744	7318.5
Laredo	2219	1432	978	1780	7766.5
Mesquite	2123	1052	629	1734	7430.5
Alexandria	2781	811	746	2818	9733.5
Hampton	2945	974	716	2950	10307.5
Seattle	0	1995	2525	796	80
Spokane	282	1714	2244	864	987
Green Bay	1934	121	878	2224	6769
Madison	1927	74	811	2091	6744.5
