# Supplementary material
Source: ML conference proceedings conference paper supplement (https://openreview.net/forum?id=tfyr2zRVoK)
Supplement: supplementary_material [file 12_EntireSummerSales_gt1.xlsx]

## Sheet: Sheet2
Row Labels	Sum of Revenue
May	21621.5
Jun	58383
Jul	23868.9
Aug	52175.7
Sep	21790
Grand Total	177839

## Sheet: Sheet1
Date	Month	Week	Promotion	Sales Channel	Product	Revenue
2020-09-16			None	In Store Sales	Doublers	160.04
2020-07-01			None	In Store Sales	Sunshine	40.76
2020-06-02			Festival of Flight	E-mail Coupon	Crested Beaut	75.62
2020-05-15			None	Web Site Sales	Quad	99.29
2020-05-17			None	In Store Sales	Carlota	46.25
2020-06-10			Festival of Flight	In Store Sales	Majectic Beaut	28.28
2020-05-03			None	In Store Sales	Sunset	71.86
2020-05-13			None	Web Site Sales	Carlota	46.1
2020-09-02			None	Web Site Sales	Bellen	23.25
2020-07-03			None	Web Site Sales	Sunbell	50.9
2020-06-04			Festival of Flight	In Store Sales	Quad	66.85
2020-09-01			None	Web Site Sales	Sunset	24.68
2020-09-10			None	Web Site Sales	Carlota	89
2020-05-21			None	Web Site Sales	Quad	68.25
2020-07-26			None	In Store Sales	Sunshine	20.88
2020-05-12			None	Web Site Sales	Sunbell	24.75
2020-05-12			None	Web Site Sales	Doublers	80.95
2020-07-29			None	Web Site Sales	Quad	306.04
2020-05-18			None	Web Site Sales	Sunshine	20.01
2020-06-30			None	Web Site Sales	Carlota	69.85
2020-05-29			None	In Store Sales	Quad	99
2020-06-13			Festival of Flight	In Store Sales	Quad	68.39
2020-07-16			None	Web Site Sales	FlatTop	28.92
2020-07-29			None	In Store Sales	Carlota	46.85
2020-09-11			None	Web Site Sales	Aspen	479.13
2020-06-10			Festival of Flight	Web Site Sales	Sunset	47.35
2020-05-18			None	Web Site Sales	Sunbell	75.91
2020-06-28			None	Web Site Sales	Sunshine	60.4
2020-06-14			Festival of Flight	Web Site Sales	Sunbell	48.59
2020-07-08			None	Web Site Sales	Sunbell	23.48
2020-05-07			None	In Store Sales	Aspen	20.72
2020-07-28			None	Web Site Sales	Sunshine	60.73
2020-05-10			None	Web Site Sales	Majectic Beaut	413.97
2020-07-08			None	Web Site Sales	Sunshine	40.6
2020-05-31			Festival of Flight	Web Site Sales	Sunshine	57.14
2020-09-03			None	E-mail Coupon	FlatTop	83.12
2020-07-18			None	E-mail Coupon	Crested Beaut	72.02
2020-09-12			None	E-mail Coupon	Aspen	80.27
2020-09-06			None	E-mail Coupon	Sunshine	60.95
2020-05-11			None	In Store Sales	Carlota	23.07
2020-06-13			Festival of Flight	In Store Sales	Sunshine	60.63
2020-07-14			None	Web Site Sales	Aspen	40.43
2020-07-27			None	In Store Sales	Sunshine	40.34
2020-07-14			None	In Store Sales	Sunshine	19.05
2020-05-18			None	E-mail Coupon	Sunshine	40.36
2020-06-27			Festival of Flight	Web Site Sales	Majectic Beaut	90.41
2020-09-07			None	E-mail Coupon	Carlota	23.46
2020-07-24			None	Web Site Sales	Crested Beaut	46.27
2020-09-17			None	In Store Sales	FlatTop	83.46
2020-06-09			Festival of Flight	Web Site Sales	Sunbell	50.34
2020-07-21			None	In Store Sales	Bellen	46.37
2020-05-26			None	Web Site Sales	Carlota	23.79
2020-07-25			None	Web Site Sales	FlatTop	28.04
2020-05-21			None	Web Site Sales	Crested Beaut	251.68
2020-06-24			Festival of Flight	Web Site Sales	Quad	68.9
2020-09-10			None	In Store Sales	Doublers	160.76
2020-09-05			None	Web Site Sales	Sunshine	60.3
2020-06-27			Festival of Flight	Web Site Sales	Sunbell	50.12
2020-06-29			None	In Store Sales	FlatTop	470.63
2020-05-26			None	E-mail Coupon	Quad	68.45
2020-09-22			None	In Store Sales	Sunbell	342.28
2020-09-29			None	In Store Sales	Majectic Beaut	29.19
2020-07-08			None	In Store Sales	Bellen	46.92
2020-09-09			None	Web Site Sales	Bellen	23.44
2020-07-27			None	In Store Sales	Sunbell	48.2
2020-09-25			None	Web Site Sales	V-Rang	57.84
2020-05-15			None	Web Site Sales	Aspen	42.01
2020-09-06			None	Web Site Sales	Sunshine	40.05
2020-07-21			None	E-mail Coupon	Bellen	23.92
2020-07-24			None	E-mail Coupon	Carlota	92.84
2020-07-20			None	In Store Sales	Bellen	69.71
2020-09-23			None	E-mail Coupon	Quad	66.22
2020-07-01			None	In Store Sales	Sunbell	24.03
2020-07-08			None	Web Site Sales	FlatTop	55.43
2020-09-19			None	In Store Sales	Sunset	71.44
2020-05-05			None	In Store Sales	Carlota	22.34
2020-09-02			None	Web Site Sales	Carlota	46.86
2020-05-29			None	Web Site Sales	Majectic Beaut	203.87
2020-06-25			Festival of Flight	Web Site Sales	Bellen	66.62
2020-09-23			None	E-mail Coupon	FlatTop	27.14
2020-06-08			Festival of Flight	In Store Sales	Carlota	521.17
2020-05-15			None	In Store Sales	Sunshine	379.16
2020-05-01			None	In Store Sales	Sunshine	40.97
2020-09-10			None	Web Site Sales	Quad	102.52
2020-07-09			None	Web Site Sales	Quad	33.61
2020-09-24			None	Web Site Sales	Quad	99.11
2020-06-25			Festival of Flight	In Store Sales	Sunshine	57.17
2020-06-25			Festival of Flight	In Store Sales	Crested Beaut	24.05
2020-09-14			None	Web Site Sales	Bellen	69.4
2020-06-12			Festival of Flight	Web Site Sales	Quad	32.81
2020-07-20			None	In Store Sales	FlatTop	549.7
2020-06-01			Festival of Flight	In Store Sales	Sunset	45.9
2020-09-01			None	E-mail Coupon	Sunbell	23.95
2020-09-22			None	Web Site Sales	Bellen	69.17
2020-07-30			None	Web Site Sales	Bellen	46.31
2020-05-17			None	Web Site Sales	Sunbell	48.95
2020-05-24			None	In Store Sales	Quad	34.46
2020-09-09			None	Web Site Sales	Carlota	69.76
2020-07-10			None	In Store Sales	Carlota	66.64
2020-05-15			None	E-mail Coupon	Carlota	69.64
2020-09-07			None	Web Site Sales	Crested Beaut	69.89
2020-07-08			None	Web Site Sales	Sunshine	40.73
2020-07-21			None	Web Site Sales	Sunshine	20.56
2020-05-03			None	Web Site Sales	Aspen	57.98
2020-07-19			None	Web Site Sales	Sunbell	48.81
2020-05-05			None	Web Site Sales	Sunset	69
2020-09-11			None	In Store Sales	FlatTop	83.52
2020-09-03			None	In Store Sales	Bellen	69.74
2020-09-28			None	In Store Sales	Majectic Beaut	58.26
2020-07-19			None	Web Site Sales	Doublers	160.72
2020-05-20			None	In Store Sales	Quad	64.07
2020-07-01			None	Web Site Sales	Bellen	23.87
2020-09-09			None	In Store Sales	Sunshine	40.08
2020-09-11			None	Web Site Sales	FlatTop	83.29
2020-07-27			None	Web Site Sales	Sunset	424.31
2020-09-02			None	E-mail Coupon	Crested Beaut	24.82
2020-07-03			None	In Store Sales	Carlota	66.92
2020-06-11			Festival of Flight	Web Site Sales	Sunbell	48.4
2020-05-19			None	In Store Sales	FlatTop	83.96
2020-06-25			Festival of Flight	In Store Sales	Sunset	342.07
2020-06-16			Festival of Flight	Web Site Sales	Aspen	60.75
2020-07-11			None	In Store Sales	Carlota	46.51
2020-06-20			Festival of Flight	Web Site Sales	Bellen	161.34
2020-05-11			None	In Store Sales	Carlota	69.6
2020-09-22			None	Web Site Sales	Sunshine	20.67
2020-06-10			Festival of Flight	Web Site Sales	Bellen	46.53
2020-07-21			None	Web Site Sales	Sunbell	50.12
2020-09-12			None	In Store Sales	Bellen	44.17
2020-07-16			None	Web Site Sales	Carlota	69.99
2020-09-17			None	Web Site Sales	Carlota	46.7
2020-05-03			None	Web Site Sales	Majectic Beaut	29.46
2020-05-21			None	Web Site Sales	Sunset	268.61
2020-09-03			None	In Store Sales	Aspen	20.57
2020-09-24			None	E-mail Coupon	Quad	99.85
2020-06-07			Festival of Flight	In Store Sales	Sunset	71.95
2020-07-05			None	Web Site Sales	Sunbell	25.92
2020-06-14			Festival of Flight	Web Site Sales	Majectic Beaut	60.57
2020-07-13			None	Web Site Sales	Carlota	23.39
2020-09-20			None	Web Site Sales	Sunshine	40.57
2020-05-24			None	Web Site Sales	Carlota	44.26
2020-06-29			None	Web Site Sales	Quad	264.35
2020-06-17			Festival of Flight	Web Site Sales	Sunbell	24.55
2020-05-20			None	E-mail Coupon	Sunshine	20.68
2020-09-16			None	Web Site Sales	Quad	99.1
2020-09-24			None	Web Site Sales	Sunshine	20.56
2020-05-25			None	Web Site Sales	Bellen	46.58
2020-07-17			None	Web Site Sales	Quad	132.68
2020-09-17			None	Web Site Sales	Sunset	23.04
2020-07-26			None	Web Site Sales	Carlota	46.84
2020-09-02			None	Web Site Sales	Bellen	46.26
2020-09-12			None	In Store Sales	Sunshine	40.81
2020-09-21			None	E-mail Coupon	Sunshine	20.62
2020-06-22			Festival of Flight	Web Site Sales	Quad	165.67
2020-07-23			None	Web Site Sales	Quad	66.58
2020-07-29			None	Web Site Sales	Carlota	23.12
2020-09-29			None	Web Site Sales	Bellen	88.37
2020-07-11			None	Web Site Sales	Sunshine	60.87
2020-09-02			None	In Store Sales	Quad	99.74
2020-07-19			None	Web Site Sales	Sunbell	333.15
2020-09-08			None	Web Site Sales	Doublers	320.55
2020-05-19			None	E-mail Coupon	Crested Beaut	25.16
2020-05-20			None	In Store Sales	Sunbell	48.52
2020-05-16			None	In Store Sales	Doublers	160.85
2020-05-30			None	E-mail Coupon	Carlota	305.94
2020-05-26			None	In Store Sales	Quad	99.09
2020-05-04			None	Web Site Sales	Bellen	92.45
2020-09-11			None	Web Site Sales	FlatTop	55.43
2020-07-15			None	Web Site Sales	Sunshine	40.85
2020-07-26			None	In Store Sales	Sunshine	57.52
2020-06-09			Festival of Flight	E-mail Coupon	Quad	66.2
2020-07-22			None	Web Site Sales	Sunshine	40.28
2020-05-23			None	Web Site Sales	Bellen	46.16
2020-07-17			None	Web Site Sales	Sunshine	20.39
2020-07-26			None	Web Site Sales	Bellen	115.08
2020-09-17			None	Web Site Sales	Majectic Beaut	523.09
2020-09-12			None	Web Site Sales	Quad	102.47
2020-05-30			None	In Store Sales	Quad	66.22
2020-07-20			None	Web Site Sales	Quad	32.15
2020-09-25			None	E-mail Coupon	Bellen	69.68
2020-06-29			None	In Store Sales	Carlota	414.73
2020-07-22			None	In Store Sales	Aspen	40.52
2020-09-20			None	Web Site Sales	Quad	68.19
2020-09-07			None	Web Site Sales	Quad	102.82
2020-07-03			None	In Store Sales	Quad	132.81
2020-05-10			None	Web Site Sales	Sunbell	25.48
2020-05-08			None	Web Site Sales	Aspen	209.67
2020-05-11			None	In Store Sales	Crested Beaut	48.41
2020-07-04			None	Web Site Sales	Sunbell	50.92
2020-07-07			None	In Store Sales	Bellen	44.09
2020-05-14			None	Web Site Sales	Sunbell	48.09
2020-05-09			None	In Store Sales	Aspen	20.28
2020-09-15			None	In Store Sales	Sunbell	46.39
2020-06-15			Festival of Flight	In Store Sales	Sunshine	100.85
2020-09-02			None	Web Site Sales	Sunbell	48.79
2020-05-27			None	In Store Sales	Doublers	80.03
2020-05-12			None	E-mail Coupon	Quad	66.08
2020-05-08			None	Web Site Sales	Sunshine	60.99
2020-09-20			None	Web Site Sales	Sunshine	40.7
2020-05-19			None	Web Site Sales	Quad	64.47
2020-05-06			None	Web Site Sales	Sunshine	40.53
2020-05-27			None	In Store Sales	Carlota	69.3
2020-09-17			None	In Store Sales	Quad	102.29
2020-09-30			None	In Store Sales	Majectic Beaut	30.06
2020-06-26			Festival of Flight	Web Site Sales	Sunbell	48.72
2020-05-19			None	In Store Sales	Sunbell	72.92
2020-05-10			None	In Store Sales	Quad	32.84
2020-07-20			None	In Store Sales	Quad	690.21
2020-07-22			None	In Store Sales	Aspen	40.81
2020-09-07			None	In Store Sales	Bellen	23.83
2020-07-04			None	In Store Sales	Carlota	396.18
2020-06-25			Festival of Flight	Web Site Sales	Majectic Beaut	58.32
2020-05-24			None	Web Site Sales	Quad	306.2
2020-07-19			None	E-mail Coupon	Majectic Beaut	60.41
2020-05-25			None	In Store Sales	Majectic Beaut	112.68
2020-05-15			None	In Store Sales	Quad	33.77
2020-07-19			None	In Store Sales	Carlota	22.31
2020-05-05			None	In Store Sales	V-Rang	54.75
2020-06-30			None	In Store Sales	Bellen	46.83
2020-07-05			None	Web Site Sales	Sunset	24.75
2020-07-25			None	Web Site Sales	Sunshine	20.83
2020-09-05			None	In Store Sales	Quad	238.6
2020-07-12			None	Web Site Sales	Bellen	23.1
2020-05-30			None	In Store Sales	Quad	66.33
2020-07-27			None	Web Site Sales	Quad	66.2
2020-05-05			None	In Store Sales	Quad	68.71
2020-05-22			None	Web Site Sales	Sunshine	38.84
2020-07-09			None	Web Site Sales	Carlota	69.08
2020-07-07			None	Web Site Sales	Bellen	23.14
2020-05-25			None	E-mail Coupon	Quad	68.21
2020-09-09			None	E-mail Coupon	Aspen	105.14
2020-06-29			None	In Store Sales	Sunset	188.73
2020-09-10			None	In Store Sales	Carlota	69.1
2020-07-15			None	In Store Sales	Crested Beaut	240.41
2020-05-06			None	In Store Sales	Carlota	69.98
2020-09-22			None	In Store Sales	FlatTop	55.3
2020-05-03			None	Web Site Sales	Quad	99.67
2020-05-12			None	Web Site Sales	Crested Beaut	96.11
2020-07-06			None	In Store Sales	Doublers	160.15
2020-09-26			None	In Store Sales	Quad	66.93
2020-07-04			None	In Store Sales	Carlota	66.66
2020-05-04			None	In Store Sales	Bellen	44.15
2020-07-13			None	In Store Sales	Crested Beaut	72.98
2020-05-21			None	E-mail Coupon	Sunshine	40.36
2020-09-22			None	Web Site Sales	Aspen	57.84
2020-07-09			None	In Store Sales	Carlota	392.42
2020-09-26			None	In Store Sales	Bellen	44.32
2020-05-11			None	Web Site Sales	Aspen	63.02
2020-09-14			None	Web Site Sales	Sunbell	48.15
2020-05-18			None	In Store Sales	Sunshine	20.24
2020-09-19			None	Web Site Sales	Doublers	228.86
2020-09-12			None	In Store Sales	Carlota	69.02
2020-06-03			Festival of Flight	Web Site Sales	Doublers	312.94
2020-07-07			None	Web Site Sales	Doublers	240.7
2020-08-02			Fall Kite Event	Web Site Sales	Quad	517.89
2020-09-26			None	Web Site Sales	Sunshine	80.27
2020-07-13			None	Web Site Sales	Sunbell	75.09
2020-05-07			None	Web Site Sales	Crested Beaut	23.38
2020-05-14			None	Web Site Sales	Carlota	69.19
2020-09-27			None	In Store Sales	V-Rang	36.34
2020-07-17			None	Web Site Sales	Carlota	69.68
2020-07-21			None	In Store Sales	Carlota	22.86
2020-07-06			None	Web Site Sales	Bellen	66.75
2020-07-03			None	Web Site Sales	Quad	66.9
2020-07-04			None	Web Site Sales	Sunshine	40.07
2020-09-22			None	Web Site Sales	Sunshine	40.83
2020-07-17			None	In Store Sales	Carlota	46.27
2020-07-27			None	Web Site Sales	Bellen	66.38
2020-07-21			None	Web Site Sales	Crested Beaut	72.74
2020-07-08			None	Web Site Sales	Bellen	69.55
2020-06-30			None	In Store Sales	Majectic Beaut	87.58
2020-07-02			None	E-mail Coupon	Quad	32.92
2020-07-10			None	In Store Sales	Quad	376.52
2020-07-01			None	In Store Sales	Sunset	71.94
2020-07-20			None	In Store Sales	Aspen	20.22
2020-09-14			None	In Store Sales	Aspen	40.24
2020-09-11			None	In Store Sales	Quad	752.68
2020-08-19			Fall Kite Event	In Store Sales	Sunset	71.8
2020-09-14			None	E-mail Coupon	Carlota	69.5
2020-09-14			None	Web Site Sales	Quad	66.13
2020-06-03			Festival of Flight	E-mail Coupon	Aspen	40.44
2020-09-26			None	In Store Sales	Bellen	46.98
2020-05-23			None	E-mail Coupon	Sunshine	60.45
2020-09-21			None	Web Site Sales	Sunshine	40.98
2020-07-09			None	In Store Sales	Carlota	22.27
2020-05-21			None	In Store Sales	Bellen	46.21
2020-05-13			None	Web Site Sales	Quad	99.51
2020-07-28			None	E-mail Coupon	Bellen	44.01
2020-09-05			None	Web Site Sales	Quad	68.2
2020-09-03			None	Web Site Sales	Bellen	46.07
2020-08-15			Fall Kite Event	Web Site Sales	Sunset	45.82
2020-09-29			None	In Store Sales	Quad	34.48
2020-07-18			None	In Store Sales	Crested Beaut	72.19
2020-07-24			None	Web Site Sales	Sunbell	48.64
2020-05-17			None	Web Site Sales	Carlota	46.55
2020-05-08			None	In Store Sales	Majectic Beaut	84.64
2020-06-12			Festival of Flight	In Store Sales	Sunset	47.68
2020-09-27			None	Web Site Sales	Majectic Beaut	30.27
2020-09-09			None	In Store Sales	Quad	33.62
2020-07-02			None	In Store Sales	Sunbell	50.44
2020-07-29			None	In Store Sales	Bellen	46.92
2020-08-16			Fall Kite Event	Web Site Sales	Sunbell	24.56
2020-05-04			None	Web Site Sales	Carlota	23.52
2020-05-24			None	In Store Sales	Bellen	23.56
2020-07-04			None	Web Site Sales	Sunbell	75.4
2020-09-13			None	In Store Sales	Carlota	69.72
2020-05-21			None	E-mail Coupon	Bellen	23.47
2020-05-17			None	In Store Sales	Bellen	66.61
2020-09-27			None	Web Site Sales	Quad	33.54
2020-05-21			None	In Store Sales	Carlota	46.65
2020-09-13			None	Web Site Sales	Bellen	22.25
2020-09-07			None	In Store Sales	Quad	68.05
2020-09-21			None	Web Site Sales	Sunshine	19.8
2020-07-09			None	In Store Sales	Sunset	469.48
2020-05-24			None	Web Site Sales	Carlota	44.33
2020-05-14			None	In Store Sales	Sunset	94.43
2020-06-03			Festival of Flight	Web Site Sales	Sunshine	57.94
2020-08-21			Fall Kite Event	Web Site Sales	Quad	66.77
2020-09-28			None	Web Site Sales	Sunshine	20.13
2020-05-08			None	Web Site Sales	Carlota	22.24
2020-05-10			None	Web Site Sales	Quad	102.35
2020-05-08			None	In Store Sales	FlatTop	55.22
2020-06-04			Festival of Flight	Web Site Sales	Crested Beaut	96.74
2020-06-23			Festival of Flight	Web Site Sales	Majectic Beaut	60.84
2020-09-02			None	Web Site Sales	Aspen	20.24
2020-09-03			None	Web Site Sales	Sunshine	80.64
2020-07-24			None	Web Site Sales	V-Rang	36.38
2020-05-03			None	Web Site Sales	Bellen	46.22
2020-07-16			None	In Store Sales	Aspen	20.57
2020-09-18			None	E-mail Coupon	Carlota	23.46
2020-07-04			None	Web Site Sales	Sunshine	80.11
2020-07-26			None	In Store Sales	Aspen	259.17
2020-09-08			None	In Store Sales	Majectic Beaut	689.96
2020-07-09			None	Web Site Sales	Sunshine	38.29
2020-09-15			None	In Store Sales	Majectic Beaut	58.17
2020-09-26			None	Web Site Sales	Carlota	46.08
2020-09-06			None	E-mail Coupon	Sunset	71.39
2020-09-14			None	In Store Sales	Sunshine	40.94
2020-05-17			None	Web Site Sales	Aspen	20.18
2020-07-06			None	In Store Sales	Bellen	46.6
2020-05-14			None	In Store Sales	Carlota	44.6
2020-09-10			None	In Store Sales	V-Rang	36.26
2020-07-22			None	Web Site Sales	Quad	32.7
2020-05-23			None	Web Site Sales	Sunshine	60.81
2020-07-15			None	E-mail Coupon	Carlota	46.32
2020-09-08			None	E-mail Coupon	FlatTop	53.81
2020-07-26			None	In Store Sales	Majectic Beaut	58.22
2020-09-09			None	In Store Sales	Bellen	44.53
2020-07-31			None	Web Site Sales	Bellen	23.56
2020-05-06			None	In Store Sales	Bellen	44.73
2020-07-14			None	In Store Sales	Aspen	42.31
2020-09-25			None	Web Site Sales	Crested Beaut	75.73
2020-05-29			None	Web Site Sales	Sunbell	46.86
2020-09-03			None	In Store Sales	Quad	66.92
2020-05-20			None	E-mail Coupon	Crested Beaut	100.5
2020-06-26			Festival of Flight	Web Site Sales	Quad	33.92
2020-06-04			Festival of Flight	Web Site Sales	Sunbell	46.2
2020-07-28			None	Web Site Sales	Quad	439.53
2020-07-29			None	Web Site Sales	Bellen	46.4
2020-05-14			None	In Store Sales	Carlota	46.77
2020-09-04			None	Web Site Sales	Quad	66.38
2020-05-06			None	In Store Sales	Carlota	23.53
2020-07-02			None	E-mail Coupon	Sunshine	40.34
2020-09-30			None	In Store Sales	Crested Beaut	72.25
2020-05-16			None	In Store Sales	Majectic Beaut	87.66
2020-06-05			Festival of Flight	E-mail Coupon	Sunshine	20.61
2020-07-30			None	In Store Sales	Sunbell	24.4
2020-07-03			None	In Store Sales	Doublers	78.81
2020-09-12			None	Web Site Sales	Aspen	60.63
2020-05-14			None	Web Site Sales	Bellen	69.73
2020-05-19			None	Web Site Sales	Crested Beaut	46.04
2020-07-06			None	Web Site Sales	Bellen	23.51
2020-05-09			None	Web Site Sales	Carlota	23.36
2020-07-11			None	Web Site Sales	Bellen	46.86
2020-05-25			None	In Store Sales	Carlota	305.1
2020-05-23			None	E-mail Coupon	FlatTop	53.48
2020-08-15			Fall Kite Event	E-mail Coupon	Bellen	23.98
2020-05-24			None	Web Site Sales	Bellen	44.34
2020-09-10			None	In Store Sales	Aspen	21.09
2020-09-26			None	E-mail Coupon	Quad	33.71
2020-07-12			None	Web Site Sales	Bellen	23.99
2020-09-29			None	In Store Sales	Carlota	46.66
2020-05-17			None	Web Site Sales	Sunshine	322.34
2020-09-11			None	Web Site Sales	Bellen	46.25
2020-05-03			None	In Store Sales	Aspen	76.62
2020-07-25			None	In Store Sales	Quad	99.25
2020-09-17			None	E-mail Coupon	Carlota	44.92
2020-05-12			None	Web Site Sales	Sunshine	60.06
2020-09-08			None	In Store Sales	Crested Beaut	23.41
2020-07-15			None	In Store Sales	Doublers	80.06
2020-07-06			None	Web Site Sales	Sunshine	284.83
2020-09-02			None	Web Site Sales	Sunshine	57.34
2020-07-08			None	In Store Sales	Doublers	234.13
2020-06-12			Festival of Flight	E-mail Coupon	Crested Beaut	25.85
2020-05-09			None	Web Site Sales	Sunshine	20.56
2020-08-22			Fall Kite Event	E-mail Coupon	Crested Beaut	48.95
2020-07-28			None	In Store Sales	Bellen	23.31
2020-07-31			None	Web Site Sales	Sunshine	57.41
2020-09-20			None	In Store Sales	Quad	66.98
2020-08-28			Fall Kite Event	Web Site Sales	Doublers	228.46
2020-08-27			Fall Kite Event	In Store Sales	Majectic Beaut	90.56
2020-05-02			None	Web Site Sales	Bellen	23.8
2020-07-29			None	In Store Sales	Sunset	514.68
2020-07-03			None	Web Site Sales	Quad	64.8
2020-08-21			Fall Kite Event	Web Site Sales	Majectic Beaut	28.13
2020-05-28			None	In Store Sales	Bellen	69.22
2020-09-17			None	Web Site Sales	V-Rang	36.48
2020-09-13			None	E-mail Coupon	Sunshine	20.96
2020-09-10			None	In Store Sales	Majectic Beaut	58.88
2020-09-17			None	E-mail Coupon	Sunshine	160.43
2020-08-10			Fall Kite Event	In Store Sales	Crested Beaut	25.98
2020-09-15			None	Web Site Sales	Quad	99.98
2020-06-20			Festival of Flight	Web Site Sales	Bellen	46.43
2020-07-12			None	In Store Sales	Majectic Beaut	84.94
2020-08-15			Fall Kite Event	Web Site Sales	Bellen	115.62
2020-05-17			None	Web Site Sales	Sunbell	502.27
2020-07-27			None	E-mail Coupon	Aspen	40.02
2020-06-07			Festival of Flight	Web Site Sales	Bellen	230.14
2020-09-21			None	In Store Sales	Sunbell	72.38
2020-05-30			None	Web Site Sales	Sunbell	48.99
2020-07-11			None	Web Site Sales	Sunshine	20.76
2020-08-11			Fall Kite Event	E-mail Coupon	Doublers	240.06
2020-05-01			None	In Store Sales	V-Rang	38.48
2020-07-20			None	In Store Sales	Doublers	835.82
2020-05-20			None	In Store Sales	Majectic Beaut	87.36
2020-09-12			None	Web Site Sales	Sunshine	40.81
2020-05-22			None	In Store Sales	Sunshine	60.59
2020-07-13			None	In Store Sales	Aspen	40.68
2020-07-03			None	Web Site Sales	Carlota	305.94
2020-09-25			None	Web Site Sales	Sunshine	20.02
2020-07-09			None	In Store Sales	Quad	99.72
2020-08-19			Fall Kite Event	In Store Sales	Quad	34.61
2020-09-23			None	Web Site Sales	Bellen	69.51
2020-06-12			Festival of Flight	Web Site Sales	Sunshine	60.19
2020-05-02			None	Web Site Sales	Carlota	23.83
2020-07-13			None	In Store Sales	Sunset	47.92
2020-07-28			None	Web Site Sales	Aspen	43
2020-05-22			None	In Store Sales	Sunbell	48.21
2020-05-20			None	Web Site Sales	Crested Beaut	50
2020-05-09			None	In Store Sales	Quad	34.18
2020-08-08			Fall Kite Event	In Store Sales	Crested Beaut	437.31
2020-07-27			None	Web Site Sales	Carlota	46.88
2020-08-31			None	In Store Sales	Quad	66.06
2020-09-27			None	Web Site Sales	Aspen	76.69
2020-09-05			None	Web Site Sales	Bellen	69.82
2020-05-13			None	In Store Sales	Carlota	23.59
2020-07-02			None	Web Site Sales	Sunset	47.46
2020-05-07			None	Web Site Sales	Sunset	71.69
2020-09-14			None	Web Site Sales	Carlota	23.06
2020-07-25			None	E-mail Coupon	Majectic Beaut	29.59
2020-05-28			None	Web Site Sales	Quad	132.81
2020-06-23			Festival of Flight	Web Site Sales	Bellen	22.05
2020-05-23			None	Web Site Sales	Majectic Beaut	240.22
2020-07-12			None	Web Site Sales	Bellen	46.7
2020-09-15			None	In Store Sales	Sunbell	50.57
2020-07-21			None	In Store Sales	Quad	34
2020-05-27			None	In Store Sales	Sunbell	69.59
2020-06-17			Festival of Flight	Web Site Sales	Quad	66.79
2020-08-09			Fall Kite Event	In Store Sales	Sunbell	75.06
2020-09-15			None	In Store Sales	Sunset	491.22
2020-09-19			None	Web Site Sales	Sunshine	60.87
2020-07-15			None	In Store Sales	Quad	33.4
2020-08-18			Fall Kite Event	In Store Sales	Sunshine	20.89
2020-06-21			Festival of Flight	In Store Sales	Sunshine	40.18
2020-07-11			None	In Store Sales	Sunset	47.46
2020-05-26			None	Web Site Sales	Sunshine	80.66
2020-09-08			None	In Store Sales	Quad	102.72
2020-06-27			Festival of Flight	In Store Sales	Doublers	240.83
2020-09-21			None	In Store Sales	Aspen	60.3
2020-09-10			None	Web Site Sales	Quad	33.57
2020-06-14			Festival of Flight	In Store Sales	Crested Beaut	25.77
2020-08-10			Fall Kite Event	In Store Sales	Quad	99.44
2020-06-21			Festival of Flight	Web Site Sales	Aspen	63.34
2020-09-12			None	In Store Sales	Quad	66.94
2020-07-01			None	Web Site Sales	Carlota	22.64
2020-07-05			None	Web Site Sales	Majectic Beaut	87.38
2020-09-04			None	Web Site Sales	Quad	102.43
2020-05-13			None	E-mail Coupon	Bellen	66.51
2020-07-19			None	In Store Sales	Sunbell	69.45
2020-09-17			None	Web Site Sales	Sunbell	524.81
2020-07-15			None	In Store Sales	Bellen	46.16
2020-05-19			None	In Store Sales	FlatTop	106.2
2020-09-01			None	Web Site Sales	V-Rang	36.4
2020-08-30			None	Web Site Sales	Quad	96.64
2020-05-08			None	In Store Sales	Bellen	46.62
2020-09-22			None	In Store Sales	FlatTop	27.67
2020-07-11			None	E-mail Coupon	Sunshine	417.93
2020-05-04			None	Web Site Sales	Quad	752.78
2020-09-21			None	Web Site Sales	Crested Beaut	96.46
2020-05-26			None	Web Site Sales	Bellen	240.59
2020-05-21			None	Web Site Sales	V-Rang	36.96
2020-07-24			None	In Store Sales	Quad	68.39
2020-08-19			Fall Kite Event	Web Site Sales	Sunbell	48.74
2020-06-10			Festival of Flight	In Store Sales	FlatTop	28.24
2020-07-19			None	In Store Sales	Sunbell	72.17
2020-05-17			None	Web Site Sales	Sunbell	69.05
2020-06-05			Festival of Flight	E-mail Coupon	Crested Beaut	46.14
2020-05-20			None	In Store Sales	Carlota	46.27
2020-08-29			Fall Kite Event	E-mail Coupon	Bellen	138
2020-06-06			Festival of Flight	Web Site Sales	Aspen	57.66
2020-07-04			None	Web Site Sales	V-Rang	36.86
2020-07-26			None	In Store Sales	Majectic Beaut	60.83
2020-05-14			None	Web Site Sales	Bellen	88.62
2020-09-20			None	In Store Sales	FlatTop	80.28
2020-07-23			None	In Store Sales	Doublers	160.04
2020-09-06			None	In Store Sales	Sunshine	40.8
2020-05-03			None	In Store Sales	Sunshine	20.78
2020-07-13			None	Web Site Sales	Bellen	46.05
2020-06-24			Festival of Flight	Web Site Sales	V-Rang	36.22
2020-07-10			None	E-mail Coupon	Sunset	71.19
2020-08-12			Fall Kite Event	E-mail Coupon	Sunbell	96.89
2020-09-26			None	In Store Sales	Sunset	23.53
2020-09-03			None	In Store Sales	Sunbell	75.36
2020-06-02			Festival of Flight	In Store Sales	Sunbell	23.64
2020-06-01			Festival of Flight	Web Site Sales	Aspen	60.45
2020-07-31			None	In Store Sales	Sunbell	96.19
2020-05-30			None	Web Site Sales	Sunbell	48.53
2020-08-05			Fall Kite Event	In Store Sales	Quad	34.71
2020-05-30			None	In Store Sales	Bellen	23.88
2020-09-05			None	Web Site Sales	Majectic Beaut	58.52
2020-05-29			None	E-mail Coupon	Crested Beaut	69.96
2020-07-24			None	Web Site Sales	Quad	33.8
2020-08-09			Fall Kite Event	Web Site Sales	Crested Beaut	48.35
2020-09-19			None	In Store Sales	FlatTop	83
2020-08-08			Fall Kite Event	E-mail Coupon	V-Rang	54.35
2020-05-28			None	E-mail Coupon	Crested Beaut	48.61
2020-09-16			None	In Store Sales	Quad	132.64
2020-05-19			None	In Store Sales	Carlota	46.88
2020-06-29			None	In Store Sales	Bellen	46.66
2020-05-05			None	E-mail Coupon	Carlota	545.7
2020-06-18			Festival of Flight	Web Site Sales	FlatTop	28.19
2020-06-01			Festival of Flight	Web Site Sales	Sunshine	40.29
2020-08-06			Fall Kite Event	E-mail Coupon	Bellen	46.62
2020-05-03			None	Web Site Sales	Bellen	46.28
2020-06-28			None	Web Site Sales	Bellen	69.58
2020-06-20			Festival of Flight	Web Site Sales	Quad	627.63
2020-08-15			Fall Kite Event	In Store Sales	FlatTop	83.33
2020-08-17			Fall Kite Event	In Store Sales	Carlota	46.82
2020-06-29			None	Web Site Sales	V-Rang	38.65
2020-08-09			Fall Kite Event	E-mail Coupon	Sunshine	20.72
2020-06-15			Festival of Flight	In Store Sales	Quad	102.38
2020-08-11			Fall Kite Event	In Store Sales	Aspen	38.95
2020-06-16			Festival of Flight	E-mail Coupon	Sunshine	20.47
2020-08-08			Fall Kite Event	E-mail Coupon	Doublers	80.2
2020-06-30			None	Web Site Sales	Sunbell	24.61
2020-07-28			None	Web Site Sales	Quad	34
2020-08-09			Fall Kite Event	Web Site Sales	Sunset	257.96
2020-08-22			Fall Kite Event	In Store Sales	Sunbell	46.72
2020-06-24			Festival of Flight	In Store Sales	Sunbell	92.32
2020-06-29			None	Web Site Sales	Carlota	23.59
2020-08-27			Fall Kite Event	Web Site Sales	Carlota	46.53
2020-06-10			Festival of Flight	Web Site Sales	Quad	33.48
2020-07-14			None	Web Site Sales	Quad	66.91
2020-08-17			Fall Kite Event	E-mail Coupon	Majectic Beaut	28.88
2020-08-08			Fall Kite Event	E-mail Coupon	Sunshine	140.44
2020-06-11			Festival of Flight	Web Site Sales	Bellen	46.52
2020-05-25			None	In Store Sales	Quad	64.35
2020-06-11			Festival of Flight	Web Site Sales	Carlota	44.39
2020-06-19			Festival of Flight	Web Site Sales	Sunshine	40.24
2020-06-07			Festival of Flight	Web Site Sales	Carlota	46.48
2020-08-24			Fall Kite Event	Web Site Sales	Carlota	23.51
2020-06-12			Festival of Flight	In Store Sales	Sunset	24.16
2020-08-19			Fall Kite Event	Web Site Sales	Bellen	92.9
2020-08-08			Fall Kite Event	In Store Sales	Majectic Beaut	87.47
2020-08-24			Fall Kite Event	Web Site Sales	Bellen	69.98
2020-08-03			Fall Kite Event	Web Site Sales	Bellen	44.33
2020-08-31			None	In Store Sales	Quad	33.23
2020-08-16			Fall Kite Event	E-mail Coupon	Sunbell	72.45
2020-08-05			Fall Kite Event	Web Site Sales	FlatTop	27.59
2020-05-12			None	Web Site Sales	Sunshine	20.89
2020-06-19			Festival of Flight	Web Site Sales	Majectic Beaut	58.18
2020-06-11			Festival of Flight	Web Site Sales	Carlota	66.66
2020-06-17			Festival of Flight	Web Site Sales	Bellen	22.94
2020-06-15			Festival of Flight	E-mail Coupon	Quad	68.36
2020-08-15			Fall Kite Event	In Store Sales	Bellen	66.33
2020-06-16			Festival of Flight	Web Site Sales	Crested Beaut	50.75
2020-09-21			None	E-mail Coupon	Doublers	240.16
2020-06-27			Festival of Flight	Web Site Sales	Quad	68.36
2020-06-16			Festival of Flight	Web Site Sales	Doublers	80.54
2020-05-17			None	Web Site Sales	Carlota	480.07
2020-08-29			Fall Kite Event	Web Site Sales	Sunset	47.92
2020-09-25			None	Web Site Sales	Aspen	42.83
2020-05-10			None	In Store Sales	Aspen	63.41
2020-09-14			None	E-mail Coupon	Crested Beaut	50.04
2020-06-28			None	In Store Sales	Bellen	23.64
2020-08-04			Fall Kite Event	In Store Sales	Carlota	69.42
2020-08-06			Fall Kite Event	In Store Sales	Sunset	71.85
2020-08-05			Fall Kite Event	In Store Sales	Majectic Beaut	29.11
2020-06-28			None	Web Site Sales	Quad	730.52
2020-08-29			Fall Kite Event	In Store Sales	Majectic Beaut	28.97
2020-08-04			Fall Kite Event	In Store Sales	Crested Beaut	25.81
2020-06-28			None	In Store Sales	Bellen	46.21
2020-08-18			Fall Kite Event	In Store Sales	Carlota	22.56
2020-09-03			None	Web Site Sales	Sunset	47.7
2020-06-03			Festival of Flight	In Store Sales	Sunshine	60.03
2020-09-05			None	E-mail Coupon	Doublers	152.44
2020-08-17			Fall Kite Event	In Store Sales	FlatTop	83.66
2020-06-19			Festival of Flight	Web Site Sales	Bellen	69.75
2020-06-26			Festival of Flight	Web Site Sales	Majectic Beaut	58.01
2020-08-19			Fall Kite Event	In Store Sales	V-Rang	54.43
2020-06-16			Festival of Flight	Web Site Sales	Doublers	560.17
2020-06-18			Festival of Flight	Web Site Sales	Sunbell	50.24
2020-08-26			Fall Kite Event	Web Site Sales	Sunshine	60.84
2020-07-30			None	Web Site Sales	Bellen	46.18
2020-05-04			None	Web Site Sales	Quad	66.7
2020-06-07			Festival of Flight	In Store Sales	Crested Beaut	48.49
2020-06-16			Festival of Flight	In Store Sales	Crested Beaut	48.61
2020-08-06			Fall Kite Event	Web Site Sales	Carlota	46.2
2020-07-26			None	E-mail Coupon	Bellen	46.18
2020-06-09			Festival of Flight	In Store Sales	V-Rang	18.51
2020-06-23			Festival of Flight	In Store Sales	Sunshine	80.19
2020-06-07			Festival of Flight	Web Site Sales	Bellen	46.62
2020-05-28			None	E-mail Coupon	Quad	99.65
2020-06-06			Festival of Flight	Web Site Sales	Crested Beaut	72.4
2020-06-18			Festival of Flight	Web Site Sales	Sunshine	40.07
2020-08-10			Fall Kite Event	E-mail Coupon	Quad	33.15
2020-06-09			Festival of Flight	Web Site Sales	Sunshine	341.85
2020-06-10			Festival of Flight	Web Site Sales	Crested Beaut	25.99
2020-08-24			Fall Kite Event	Web Site Sales	Quad	102.05
2020-08-25			Fall Kite Event	In Store Sales	Aspen	38.32
2020-06-18			Festival of Flight	Web Site Sales	Aspen	38.05
2020-08-01			None	In Store Sales	Sunshine	60.4
2020-09-22			None	Web Site Sales	Quad	658.76
2020-08-22			Fall Kite Event	E-mail Coupon	Crested Beaut	69.87
2020-07-03			None	Web Site Sales	Crested Beaut	48.31
2020-08-25			Fall Kite Event	E-mail Coupon	Bellen	22.16
2020-06-21			Festival of Flight	Web Site Sales	Sunshine	40.51
2020-07-26			None	In Store Sales	Sunset	47.54
2020-08-16			Fall Kite Event	Web Site Sales	Doublers	228.22
2020-06-10			Festival of Flight	In Store Sales	Carlota	46.88
2020-06-22			Festival of Flight	In Store Sales	Carlota	46.62
2020-06-30			None	In Store Sales	Majectic Beaut	120.75
2020-08-17			Fall Kite Event	Web Site Sales	Crested Beaut	48.98
2020-06-04			Festival of Flight	Web Site Sales	Bellen	88.69
2020-08-09			Fall Kite Event	Web Site Sales	Majectic Beaut	60.87
2020-09-16			None	In Store Sales	FlatTop	83.02
2020-08-16			Fall Kite Event	Web Site Sales	Carlota	46.55
2020-08-24			Fall Kite Event	In Store Sales	Sunbell	25.85
2020-06-27			Festival of Flight	Web Site Sales	Crested Beaut	50.52
2020-09-12			None	Web Site Sales	Sunbell	46.22
2020-06-03			Festival of Flight	Web Site Sales	V-Rang	76.9
2020-06-27			Festival of Flight	In Store Sales	Carlota	69.39
2020-07-12			None	Web Site Sales	Quad	99.97
2020-08-27			Fall Kite Event	In Store Sales	Quad	33.41
2020-05-06			None	Web Site Sales	Crested Beaut	25.69
2020-08-26			Fall Kite Event	In Store Sales	Carlota	46.99
2020-06-09			Festival of Flight	Web Site Sales	Carlota	69.58
2020-09-12			None	Web Site Sales	Sunset	71.84
2020-06-19			Festival of Flight	Web Site Sales	Quad	64.54
2020-08-16			Fall Kite Event	In Store Sales	Aspen	40.4
2020-06-27			Festival of Flight	Web Site Sales	Majectic Beaut	87.19
2020-06-02			Festival of Flight	E-mail Coupon	Bellen	138.06
2020-06-08			Festival of Flight	Web Site Sales	Sunbell	46.49
2020-06-13			Festival of Flight	Web Site Sales	Majectic Beaut	523.74
2020-08-28			Fall Kite Event	Web Site Sales	Sunbell	72.96
2020-06-02			Festival of Flight	Web Site Sales	Carlota	92.47
2020-07-20			None	In Store Sales	Sunshine	60.43
2020-08-09			Fall Kite Event	In Store Sales	Quad	68.59
2020-06-27			Festival of Flight	In Store Sales	Quad	99.67
2020-08-23			Fall Kite Event	In Store Sales	Sunshine	60.42
2020-06-11			Festival of Flight	Web Site Sales	V-Rang	38.79
2020-05-28			None	In Store Sales	Quad	96.96
2020-08-09			Fall Kite Event	E-mail Coupon	Sunset	24.33
2020-06-01			Festival of Flight	Web Site Sales	Quad	99.83
2020-09-15			None	In Store Sales	Sunbell	46.16
2020-06-27			Festival of Flight	Web Site Sales	Sunshine	20.58
2020-05-19			None	Web Site Sales	Carlota	46.83
2020-08-30			None	In Store Sales	Quad	34.01
2020-07-24			None	Web Site Sales	Sunshine	38.77
2020-06-01			Festival of Flight	In Store Sales	Doublers	240.01
2020-07-05			None	Web Site Sales	Carlota	69.02
2020-08-22			Fall Kite Event	E-mail Coupon	Bellen	69.27
2020-08-29			Fall Kite Event	In Store Sales	Sunbell	48.69
2020-06-29			None	Web Site Sales	Bellen	46.82
2020-06-05			Festival of Flight	In Store Sales	Crested Beaut	48.67
2020-06-28			None	Web Site Sales	Bellen	23.27
2020-05-27			None	Web Site Sales	Carlota	46.34
2020-06-20			Festival of Flight	Web Site Sales	Majectic Beaut	58.48
2020-06-22			Festival of Flight	Web Site Sales	Carlota	69.2
2020-08-03			Fall Kite Event	In Store Sales	Aspen	60.72
2020-06-09			Festival of Flight	In Store Sales	Aspen	57.43
2020-06-07			Festival of Flight	Web Site Sales	Crested Beaut	24.24
2020-06-13			Festival of Flight	Web Site Sales	FlatTop	186.62
2020-06-21			Festival of Flight	In Store Sales	Quad	68.37
2020-08-02			Fall Kite Event	In Store Sales	Quad	34
2020-06-03			Festival of Flight	In Store Sales	Quad	32.36
2020-08-17			Fall Kite Event	In Store Sales	Sunbell	50.58
2020-06-27			Festival of Flight	Web Site Sales	Sunset	47.05
2020-06-24			Festival of Flight	In Store Sales	Bellen	44.27
2020-08-05			Fall Kite Event	In Store Sales	Carlota	46.29
2020-08-22			Fall Kite Event	Web Site Sales	Sunshine	57.74
2020-07-18			None	E-mail Coupon	Carlota	23.79
2020-09-04			None	Web Site Sales	Sunshine	180.32
2020-08-10			Fall Kite Event	In Store Sales	Carlota	46.6
2020-06-27			Festival of Flight	E-mail Coupon	Carlota	46.1
2020-08-06			Fall Kite Event	In Store Sales	Majectic Beaut	87.68
2020-06-15			Festival of Flight	Web Site Sales	Sunset	71.77
2020-06-16			Festival of Flight	In Store Sales	Quad	33.56
2020-08-22			Fall Kite Event	In Store Sales	Carlota	23.32
2020-09-01			None	Web Site Sales	FlatTop	601.94
2020-05-10			None	Web Site Sales	Sunset	47.03
2020-05-22			None	In Store Sales	Quad	68.08
2020-06-19			Festival of Flight	Web Site Sales	Bellen	46.84
2020-08-05			Fall Kite Event	In Store Sales	Bellen	46.09
2020-09-16			None	Web Site Sales	Carlota	23.83
2020-08-24			Fall Kite Event	In Store Sales	Aspen	20.62
2020-06-14			Festival of Flight	Web Site Sales	Bellen	44.56
2020-08-10			Fall Kite Event	In Store Sales	Bellen	23.19
2020-06-03			Festival of Flight	Web Site Sales	Quad	102.57
2020-05-30			None	In Store Sales	Doublers	240.23
2020-06-25			Festival of Flight	Web Site Sales	V-Rang	90.23
2020-06-29			None	Web Site Sales	Quad	160.67
2020-06-29			None	Web Site Sales	Carlota	66.97
2020-08-02			Fall Kite Event	In Store Sales	Bellen	44.78
2020-06-15			Festival of Flight	Web Site Sales	Bellen	66.76
2020-08-31			None	In Store Sales	V-Rang	57.57
2020-05-15			None	Web Site Sales	Quad	66.97
2020-06-15			Festival of Flight	Web Site Sales	Bellen	46.34
2020-06-18			Festival of Flight	E-mail Coupon	Carlota	23.29
2020-09-06			None	In Store Sales	Carlota	69.88
2020-08-14			Fall Kite Event	Web Site Sales	Majectic Beaut	90.6
2020-06-30			None	Web Site Sales	Quad	99.45
2020-08-09			Fall Kite Event	Web Site Sales	Sunbell	25.17
2020-07-30			None	Web Site Sales	Aspen	63.34
2020-06-07			Festival of Flight	In Store Sales	Carlota	327.91
2020-09-01			None	Web Site Sales	Sunset	24.88
2020-06-14			Festival of Flight	Web Site Sales	Sunshine	19.38
2020-06-22			Festival of Flight	Web Site Sales	Quad	68.08
2020-08-18			Fall Kite Event	Web Site Sales	Bellen	69.07
2020-08-06			Fall Kite Event	In Store Sales	Aspen	40.74
2020-08-06			Fall Kite Event	Web Site Sales	Crested Beaut	24.62
2020-06-24			Festival of Flight	In Store Sales	Quad	66.91
2020-06-05			Festival of Flight	Web Site Sales	Sunset	24.76
2020-08-17			Fall Kite Event	In Store Sales	Quad	102.34
2020-06-12			Festival of Flight	Web Site Sales	Aspen	80.86
2020-06-30			None	E-mail Coupon	Carlota	23.85
2020-06-22			Festival of Flight	Web Site Sales	Carlota	22.97
2020-06-26			Festival of Flight	In Store Sales	Crested Beaut	46.75
2020-06-28			None	Web Site Sales	Carlota	44.82
2020-08-26			Fall Kite Event	In Store Sales	Quad	99.42
2020-08-25			Fall Kite Event	Web Site Sales	Sunshine	38.57
2020-06-08			Festival of Flight	Web Site Sales	Carlota	176.27
2020-06-20			Festival of Flight	Web Site Sales	Quad	192.39
2020-06-29			None	Web Site Sales	Doublers	152.17
2020-08-05			Fall Kite Event	E-mail Coupon	Carlota	46.58
2020-06-16			Festival of Flight	Web Site Sales	Quad	96.55
2020-08-17			Fall Kite Event	In Store Sales	Quad	32.13
2020-08-30			None	In Store Sales	Bellen	46.88
2020-08-06			Fall Kite Event	Web Site Sales	Majectic Beaut	90.03
2020-05-11			None	Web Site Sales	Sunbell	46.21
2020-06-26			Festival of Flight	Web Site Sales	Carlota	22.27
2020-08-14			Fall Kite Event	In Store Sales	V-Rang	57.56
2020-06-02			Festival of Flight	In Store Sales	Bellen	46.08
2020-07-02			None	Web Site Sales	Crested Beaut	50.71
2020-08-12			Fall Kite Event	Web Site Sales	Sunshine	40.45
2020-08-28			Fall Kite Event	In Store Sales	Majectic Beaut	90.57
2020-06-07			Festival of Flight	In Store Sales	V-Rang	57.35
2020-09-21			None	Web Site Sales	Aspen	63.82
2020-06-15			Festival of Flight	In Store Sales	Carlota	46.08
2020-08-17			Fall Kite Event	In Store Sales	Bellen	69.13
2020-05-18			None	Web Site Sales	Sunbell	547.46
2020-06-12			Festival of Flight	Web Site Sales	Sunset	45.16
2020-06-24			Festival of Flight	Web Site Sales	Sunshine	19.62
2020-08-26			Fall Kite Event	In Store Sales	Quad	64.91
2020-08-29			Fall Kite Event	Web Site Sales	Aspen	63.3
2020-07-15			None	In Store Sales	Quad	99.77
2020-08-01			None	Web Site Sales	Bellen	92.23
2020-08-14			Fall Kite Event	In Store Sales	Sunset	23.41
2020-09-25			None	In Store Sales	Aspen	40.07
2020-06-03			Festival of Flight	Web Site Sales	FlatTop	554.95
2020-08-06			Fall Kite Event	In Store Sales	Sunshine	60.7
2020-08-11			Fall Kite Event	In Store Sales	Bellen	23.65
2020-08-23			Fall Kite Event	Web Site Sales	Quad	34.78
2020-06-18			Festival of Flight	Web Site Sales	Doublers	156.2
2020-08-27			Fall Kite Event	Web Site Sales	Sunbell	50.2
2020-05-13			None	Web Site Sales	Bellen	46.71
2020-08-06			Fall Kite Event	Web Site Sales	Crested Beaut	48.69
2020-08-11			Fall Kite Event	E-mail Coupon	Aspen	20.83
2020-08-16			Fall Kite Event	In Store Sales	Aspen	57.28
2020-08-02			Fall Kite Event	In Store Sales	Quad	64.44
2020-06-05			Festival of Flight	Web Site Sales	Sunbell	72.9
2020-06-19			Festival of Flight	Web Site Sales	Majectic Beaut	29.45
2020-06-10			Festival of Flight	In Store Sales	Bellen	23.82
2020-08-02			Fall Kite Event	E-mail Coupon	V-Rang	76
2020-07-21			None	Web Site Sales	Bellen	69.72
2020-06-18			Festival of Flight	In Store Sales	Carlota	66.48
2020-09-12			None	In Store Sales	Sunbell	75.49
2020-08-01			None	In Store Sales	Carlota	46.56
2020-06-14			Festival of Flight	In Store Sales	Sunshine	20.87
2020-06-21			Festival of Flight	In Store Sales	FlatTop	55.48
2020-06-26			Festival of Flight	Web Site Sales	Sunbell	50.71
2020-07-15			None	In Store Sales	Quad	66.1
2020-05-13			None	In Store Sales	Bellen	46.73
2020-06-27			Festival of Flight	E-mail Coupon	Sunshine	100.66
2020-06-09			Festival of Flight	Web Site Sales	Majectic Beaut	60.89
2020-08-29			Fall Kite Event	In Store Sales	Bellen	69.16
2020-08-25			Fall Kite Event	Web Site Sales	Quad	64.55
2020-06-15			Festival of Flight	E-mail Coupon	Majectic Beaut	84.47
2020-06-04			Festival of Flight	Web Site Sales	Bellen	23.48
2020-06-04			Festival of Flight	E-mail Coupon	Majectic Beaut	60.73
2020-06-15			Festival of Flight	In Store Sales	Carlota	23.28
2020-06-02			Festival of Flight	Web Site Sales	Sunbell	50.41
2020-07-23			None	Web Site Sales	Sunbell	75.61
2020-07-29			None	In Store Sales	Crested Beaut	296.78
2020-08-16			Fall Kite Event	In Store Sales	Aspen	38.83
2020-08-21			Fall Kite Event	In Store Sales	Bellen	46.42
2020-08-25			Fall Kite Event	Web Site Sales	Sunshine	38.39
2020-05-23			None	Web Site Sales	Carlota	22.38
2020-07-14			None	E-mail Coupon	V-Rang	38.24
2020-08-07			Fall Kite Event	In Store Sales	Sunbell	48.37
2020-08-01			None	E-mail Coupon	Bellen	23.02
2020-06-10			Festival of Flight	In Store Sales	Sunset	45.6
2020-08-29			Fall Kite Event	In Store Sales	Aspen	19.42
2020-08-24			Fall Kite Event	In Store Sales	Doublers	76.98
2020-06-07			Festival of Flight	Web Site Sales	Sunshine	20.87
2020-07-28			None	In Store Sales	V-Rang	57.85
2020-08-19			Fall Kite Event	Web Site Sales	Aspen	19.46
2020-08-19			Fall Kite Event	In Store Sales	Quad	64.65
2020-06-23			Festival of Flight	Web Site Sales	Aspen	38.6
2020-06-16			Festival of Flight	Web Site Sales	V-Rang	18.66
2020-08-10			Fall Kite Event	Web Site Sales	Majectic Beaut	29.45
2020-06-15			Festival of Flight	Web Site Sales	Sunshine	432.85
2020-08-27			Fall Kite Event	Web Site Sales	Majectic Beaut	58.93
2020-08-04			Fall Kite Event	In Store Sales	Sunshine	60.07
2020-05-18			None	Web Site Sales	Sunbell	50.23
2020-08-14			Fall Kite Event	In Store Sales	Bellen	46.11
2020-08-27			Fall Kite Event	In Store Sales	Bellen	44.16
2020-06-28			None	Web Site Sales	Majectic Beaut	87.83
2020-06-19			Festival of Flight	In Store Sales	Carlota	23.57
2020-05-10			None	E-mail Coupon	Aspen	60.88
2020-06-05			Festival of Flight	Web Site Sales	Doublers	80.74
2020-09-05			None	Web Site Sales	Quad	99.44
2020-06-08			Festival of Flight	In Store Sales	V-Rang	308.87
2020-08-16			Fall Kite Event	In Store Sales	Sunshine	38.86
2020-06-14			Festival of Flight	E-mail Coupon	Aspen	38.48
2020-09-11			None	Web Site Sales	V-Rang	36.89
2020-06-22			Festival of Flight	Web Site Sales	Bellen	46.16
2020-08-16			Fall Kite Event	In Store Sales	Aspen	40.26
2020-06-27			Festival of Flight	Web Site Sales	Carlota	46.88
2020-06-18			Festival of Flight	Web Site Sales	Quad	66.07
2020-08-17			Fall Kite Event	In Store Sales	Majectic Beaut	90.57
2020-09-11			None	Web Site Sales	Sunshine	40.54
2020-08-09			Fall Kite Event	In Store Sales	Sunbell	50.42
2020-08-21			Fall Kite Event	E-mail Coupon	Sunset	47.13
2020-06-03			Festival of Flight	In Store Sales	Sunshine	60.84
2020-08-17			Fall Kite Event	In Store Sales	Carlota	46.98
2020-07-25			None	Web Site Sales	V-Rang	36.95
2020-09-16			None	In Store Sales	Sunset	90.97
2020-06-12			Festival of Flight	Web Site Sales	Majectic Beaut	30.27
2020-06-01			Festival of Flight	In Store Sales	Carlota	46.27
2020-06-30			None	Web Site Sales	Sunset	68.64
2020-06-16			Festival of Flight	Web Site Sales	Sunbell	48.22
2020-08-18			Fall Kite Event	In Store Sales	Sunset	165.2
2020-08-25			Fall Kite Event	In Store Sales	Carlota	46.94
2020-08-14			Fall Kite Event	Web Site Sales	Quad	68.54
2020-08-11			Fall Kite Event	In Store Sales	Bellen	69.54
2020-06-22			Festival of Flight	Web Site Sales	Carlota	69.92
2020-08-10			Fall Kite Event	In Store Sales	Quad	33.42
2020-05-22			None	E-mail Coupon	Carlota	46.14
2020-08-04			Fall Kite Event	In Store Sales	Sunbell	96.73
2020-08-31			None	In Store Sales	Bellen	46.17
2020-08-01			None	In Store Sales	Sunbell	75.77
2020-07-22			None	In Store Sales	Bellen	92.92
2020-06-24			Festival of Flight	Web Site Sales	Quad	68.72
2020-06-11			Festival of Flight	Web Site Sales	Quad	64.29
2020-06-10			Festival of Flight	Web Site Sales	Quad	99.52
2020-06-08			Festival of Flight	Web Site Sales	Aspen	20.12
2020-08-29			Fall Kite Event	In Store Sales	Majectic Beaut	58.7
2020-05-06			None	E-mail Coupon	Sunshine	20.52
2020-07-06			None	In Store Sales	Carlota	23.28
2020-09-15			None	Web Site Sales	Sunset	514.06
2020-06-12			Festival of Flight	In Store Sales	Carlota	46.94
2020-05-17			None	Web Site Sales	Sunbell	46.85
2020-08-11			Fall Kite Event	In Store Sales	Sunshine	60.62
2020-06-19			Festival of Flight	Web Site Sales	Bellen	46.1
2020-06-10			Festival of Flight	Web Site Sales	Majectic Beaut	570.93
2020-05-08			None	Web Site Sales	Aspen	42.72
2020-06-21			Festival of Flight	Web Site Sales	Sunset	71.13
2020-08-19			Fall Kite Event	Web Site Sales	Sunshine	40.65
2020-06-27			Festival of Flight	Web Site Sales	Sunshine	40.8
2020-05-11			None	E-mail Coupon	Quad	68.13
2020-06-03			Festival of Flight	Web Site Sales	Carlota	23.26
2020-09-10			None	Web Site Sales	Aspen	38.98
2020-07-26			None	Web Site Sales	Sunbell	48.75
2020-09-25			None	In Store Sales	Crested Beaut	72.06
2020-08-16			Fall Kite Event	In Store Sales	Quad	132.27
2020-06-26			Festival of Flight	In Store Sales	Doublers	240.39
2020-06-07			Festival of Flight	Web Site Sales	Crested Beaut	25.49
2020-09-14			None	In Store Sales	Carlota	23.91
2020-08-04			Fall Kite Event	E-mail Coupon	Crested Beaut	48.98
2020-09-03			None	Web Site Sales	Doublers	240.17
2020-06-23			Festival of Flight	Web Site Sales	Bellen	414.74
2020-08-14			Fall Kite Event	Web Site Sales	Sunbell	23.45
2020-08-27			Fall Kite Event	E-mail Coupon	Carlota	305.39
2020-06-15			Festival of Flight	Web Site Sales	Sunshine	455.46
2020-09-19			None	Web Site Sales	Carlota	23.64
2020-06-21			Festival of Flight	In Store Sales	Quad	99.08
2020-05-13			None	In Store Sales	FlatTop	28.35
2020-08-30			None	In Store Sales	Doublers	835.55
2020-06-07			Festival of Flight	Web Site Sales	Sunshine	40.84
2020-08-27			Fall Kite Event	Web Site Sales	Carlota	23.67
2020-07-12			None	In Store Sales	Quad	64.73
2020-09-25			None	Web Site Sales	Carlota	23.51
2020-08-22			Fall Kite Event	In Store Sales	Quad	272.22
2020-06-30			None	In Store Sales	Sunbell	24.18
2020-08-13			Fall Kite Event	In Store Sales	Doublers	240.19
2020-06-16			Festival of Flight	In Store Sales	FlatTop	470.98
2020-08-02			Fall Kite Event	In Store Sales	Sunshine	20.78
2020-06-19			Festival of Flight	In Store Sales	Aspen	259.74
2020-08-11			Fall Kite Event	In Store Sales	Sunset	71.05
2020-08-07			Fall Kite Event	Web Site Sales	Carlota	46.3
2020-08-31			None	In Store Sales	Aspen	42.04
2020-05-20			None	Web Site Sales	Sunbell	50.98
2020-09-18			None	Web Site Sales	Quad	96.43
2020-06-24			Festival of Flight	E-mail Coupon	Sunshine	20.38
2020-06-12			Festival of Flight	In Store Sales	Bellen	46.69
2020-08-11			Fall Kite Event	Web Site Sales	Quad	486.68
2020-09-29			None	Web Site Sales	Carlota	69.25
2020-07-21			None	Web Site Sales	Quad	99.01
2020-08-27			Fall Kite Event	In Store Sales	Carlota	23.16
2020-06-17			Festival of Flight	E-mail Coupon	Majectic Beaut	58.53
2020-06-13			Festival of Flight	Web Site Sales	Sunshine	20.12
2020-06-18			Festival of Flight	In Store Sales	Bellen	161.48
2020-08-28			Fall Kite Event	In Store Sales	V-Rang	36.75
2020-06-12			Festival of Flight	E-mail Coupon	Carlota	46.04
2020-09-26			None	Web Site Sales	Carlota	23.47
2020-06-08			Festival of Flight	Web Site Sales	Sunshine	436.31
2020-06-06			Festival of Flight	Web Site Sales	Doublers	152.8
2020-08-23			Fall Kite Event	Web Site Sales	Crested Beaut	46.13
2020-08-06			Fall Kite Event	E-mail Coupon	Sunset	45.07
2020-09-29			None	Web Site Sales	V-Rang	19.73
2020-08-21			Fall Kite Event	In Store Sales	Carlota	240.64
2020-06-06			Festival of Flight	Web Site Sales	Majectic Beaut	441.09
2020-06-27			Festival of Flight	Web Site Sales	Quad	99.37
2020-08-04			Fall Kite Event	E-mail Coupon	Bellen	69.28
2020-06-28			None	Web Site Sales	Bellen	46.88
2020-06-20			Festival of Flight	Web Site Sales	Quad	99.28
2020-06-18			Festival of Flight	Web Site Sales	Sunset	23.9
2020-08-26			Fall Kite Event	Web Site Sales	Sunbell	92.43
2020-09-11			None	Web Site Sales	Sunshine	40.94
2020-06-12			Festival of Flight	Web Site Sales	Quad	96.81
2020-06-06			Festival of Flight	In Store Sales	Bellen	69.36
2020-08-29			Fall Kite Event	Web Site Sales	Sunshine	40.51
2020-05-23			None	In Store Sales	Quad	160.6
2020-08-03			Fall Kite Event	Web Site Sales	FlatTop	55.36
2020-08-09			Fall Kite Event	In Store Sales	Majectic Beaut	87.79
2020-06-12			Festival of Flight	Web Site Sales	Sunshine	38.77
2020-08-12			Fall Kite Event	In Store Sales	Sunset	45.98
2020-08-23			Fall Kite Event	In Store Sales	Sunbell	48.35
2020-09-01			None	In Store Sales	FlatTop	110.05
2020-06-26			Festival of Flight	Web Site Sales	Carlota	371.34
2020-06-16			Festival of Flight	Web Site Sales	Bellen	46.18
2020-09-20			None	Web Site Sales	Carlota	23.36
2020-05-10			None	Web Site Sales	Sunbell	25.16
2020-06-19			Festival of Flight	Web Site Sales	Bellen	69.37
2020-06-10			Festival of Flight	Web Site Sales	Carlota	523.21
2020-08-23			Fall Kite Event	Web Site Sales	Carlota	46.6
2020-08-26			Fall Kite Event	In Store Sales	Sunshine	38.11
2020-06-11			Festival of Flight	In Store Sales	Carlota	23.76
2020-09-26			None	Web Site Sales	Quad	198.15
2020-07-17			None	E-mail Coupon	Carlota	46.48
2020-07-13			None	Web Site Sales	Sunbell	388.15
2020-06-29			None	In Store Sales	Quad	549.99
2020-08-08			Fall Kite Event	In Store Sales	Sunset	24.19
2020-08-07			Fall Kite Event	In Store Sales	Bellen	23.37
2020-08-26			Fall Kite Event	In Store Sales	Carlota	46.13
2020-08-03			Fall Kite Event	E-mail Coupon	Sunshine	40.33
2020-08-03			Fall Kite Event	In Store Sales	Sunbell	72.47
2020-06-23			Festival of Flight	In Store Sales	Sunshine	40.3
2020-08-03			Fall Kite Event	In Store Sales	Quad	99.78
2020-08-03			Fall Kite Event	Web Site Sales	Sunset	24.62
2020-08-07			Fall Kite Event	In Store Sales	Quad	96.01
2020-05-31			Festival of Flight	Web Site Sales	Sunbell	48.77
2020-06-01			Festival of Flight	Web Site Sales	Majectic Beaut	90.47
2020-06-13			Festival of Flight	In Store Sales	Quad	165.62
2020-08-14			Fall Kite Event	In Store Sales	Sunshine	38.37
2020-06-24			Festival of Flight	In Store Sales	Sunshine	20.84
2020-06-02			Festival of Flight	Web Site Sales	Carlota	110.85
2020-09-17			None	Web Site Sales	Carlota	69.32
2020-06-24			Festival of Flight	E-mail Coupon	Sunset	71.7
2020-08-22			Fall Kite Event	E-mail Coupon	Quad	68.46
2020-06-20			Festival of Flight	Web Site Sales	Carlota	23.11
2020-06-12			Festival of Flight	Web Site Sales	Sunshine	417.42
2020-08-15			Fall Kite Event	In Store Sales	Sunshine	20.8
2020-06-14			Festival of Flight	Web Site Sales	Quad	297.15
2020-06-09			Festival of Flight	E-mail Coupon	Aspen	42.23
2020-08-21			Fall Kite Event	Web Site Sales	Sunbell	50.1
2020-06-18			Festival of Flight	In Store Sales	Quad	34.63
2020-08-15			Fall Kite Event	Web Site Sales	Quad	66.89
2020-06-02			Festival of Flight	E-mail Coupon	FlatTop	55.49
2020-08-22			Fall Kite Event	Web Site Sales	Bellen	69.77
2020-06-26			Festival of Flight	In Store Sales	Quad	34.45
2020-07-01			None	Web Site Sales	Sunset	24.59
2020-09-02			None	In Store Sales	Doublers	160.03
2020-05-22			None	Web Site Sales	V-Rang	54.49
2020-06-18			Festival of Flight	Web Site Sales	Quad	66.36
2020-08-28			Fall Kite Event	Web Site Sales	Crested Beaut	75.16
2020-08-29			Fall Kite Event	In Store Sales	Sunshine	38.64
2020-08-29			Fall Kite Event	In Store Sales	Quad	64.87
2020-06-07			Festival of Flight	Web Site Sales	Bellen	46.19
2020-05-30			None	E-mail Coupon	Bellen	23.77
2020-06-04			Festival of Flight	In Store Sales	Sunset	47.59
2020-06-12			Festival of Flight	Web Site Sales	Sunshine	20.73
2020-08-15			Fall Kite Event	In Store Sales	Bellen	46.73
2020-08-03			Fall Kite Event	Web Site Sales	Aspen	76.31
2020-06-10			Festival of Flight	Web Site Sales	Bellen	69.46
2020-07-23			None	In Store Sales	Sunbell	75.3
2020-08-02			Fall Kite Event	In Store Sales	Aspen	80.41
2020-08-31			None	Web Site Sales	FlatTop	55.04
2020-08-10			Fall Kite Event	In Store Sales	Sunshine	20.34
2020-09-30			None	Web Site Sales	Sunbell	23.73
2020-08-17			Fall Kite Event	In Store Sales	Quad	596.19
2020-06-07			Festival of Flight	E-mail Coupon	Sunset	94.91
2020-08-17			Fall Kite Event	In Store Sales	Bellen	23.64
2020-06-01			Festival of Flight	Web Site Sales	Sunbell	69.81
2020-05-31			Festival of Flight	Web Site Sales	Quad	34.78
2020-08-21			Fall Kite Event	E-mail Coupon	Quad	66.09
2020-08-24			Fall Kite Event	E-mail Coupon	Bellen	414.52
2020-06-18			Festival of Flight	In Store Sales	Quad	34.2
2020-08-15			Fall Kite Event	In Store Sales	Quad	68.84
2020-05-09			None	E-mail Coupon	Crested Beaut	25.81
2020-06-30			None	In Store Sales	Sunbell	48.34
2020-08-15			Fall Kite Event	Web Site Sales	Bellen	46.23
2020-08-29			Fall Kite Event	E-mail Coupon	Bellen	69.28
2020-08-02			Fall Kite Event	In Store Sales	Crested Beaut	50.36
2020-08-06			Fall Kite Event	In Store Sales	Quad	33.58
2020-08-25			Fall Kite Event	In Store Sales	Bellen	230.45
2020-08-14			Fall Kite Event	E-mail Coupon	Carlota	23.5
2020-06-24			Festival of Flight	Web Site Sales	Crested Beaut	50.77
2020-06-27			Festival of Flight	Web Site Sales	Doublers	240.11
2020-06-02			Festival of Flight	Web Site Sales	Quad	99.47
2020-06-18			Festival of Flight	Web Site Sales	Sunset	47.94
2020-06-03			Festival of Flight	In Store Sales	Quad	99.69
2020-07-01			None	Web Site Sales	Quad	102.69
2020-08-19			Fall Kite Event	Web Site Sales	Sunset	94.99
2020-06-21			Festival of Flight	Web Site Sales	Sunbell	25.38
2020-06-07			Festival of Flight	Web Site Sales	Sunbell	48.84
2020-08-09			Fall Kite Event	In Store Sales	Crested Beaut	523.94
2020-08-06			Fall Kite Event	In Store Sales	Bellen	69.95
2020-06-11			Festival of Flight	In Store Sales	Aspen	40.26
2020-08-06			Fall Kite Event	Web Site Sales	Sunbell	72.5
2020-08-23			Fall Kite Event	In Store Sales	Aspen	38.69
2020-08-16			Fall Kite Event	Web Site Sales	Sunbell	546.23
2020-06-19			Festival of Flight	Web Site Sales	Crested Beaut	48.23
2020-08-23			Fall Kite Event	In Store Sales	Majectic Beaut	87.14
2020-08-15			Fall Kite Event	In Store Sales	FlatTop	302.06
2020-06-14			Festival of Flight	Web Site Sales	Doublers	160.25
2020-07-02			None	E-mail Coupon	Majectic Beaut	232.87
2020-08-24			Fall Kite Event	In Store Sales	Majectic Beaut	60.94
2020-09-14			None	Web Site Sales	Sunbell	75.8
2020-08-13			Fall Kite Event	Web Site Sales	Sunshine	20.4
2020-09-13			None	Web Site Sales	Sunbell	46.13
2020-09-26			None	Web Site Sales	Sunbell	48.27
2020-05-29			None	In Store Sales	Bellen	23.46
2020-08-05			Fall Kite Event	Web Site Sales	Majectic Beaut	90.55
2020-08-14			Fall Kite Event	In Store Sales	Crested Beaut	48.05
2020-05-17			None	Web Site Sales	FlatTop	55.1
2020-05-14			None	In Store Sales	Sunset	47.12
2020-08-14			Fall Kite Event	E-mail Coupon	Quad	99.9
2020-05-23			None	Web Site Sales	Crested Beaut	75.97
2020-06-02			Festival of Flight	Web Site Sales	Sunshine	40.72
2020-06-28			None	E-mail Coupon	Crested Beaut	75.04
2020-08-01			None	Web Site Sales	Sunshine	60.66
2020-08-29			Fall Kite Event	In Store Sales	Majectic Beaut	29.51
2020-08-11			Fall Kite Event	Web Site Sales	Carlota	46.06
2020-08-22			Fall Kite Event	In Store Sales	Carlota	46.43
2020-08-10			Fall Kite Event	E-mail Coupon	Crested Beaut	72.44
2020-09-27			None	In Store Sales	Sunbell	75.82
2020-09-21			None	Web Site Sales	Bellen	66.27
2020-08-10			Fall Kite Event	In Store Sales	Sunshine	60.15
2020-08-08			Fall Kite Event	Web Site Sales	Majectic Beaut	58.94
2020-08-17			Fall Kite Event	In Store Sales	Sunbell	69.37
2020-06-17			Festival of Flight	Web Site Sales	V-Rang	18.68
2020-06-13			Festival of Flight	E-mail Coupon	Crested Beaut	75.25
2020-08-10			Fall Kite Event	Web Site Sales	Quad	34.36
2020-09-29			None	Web Site Sales	Quad	99.52
2020-09-30			None	Web Site Sales	Sunbell	24.75
2020-05-29			None	Web Site Sales	Sunbell	69.84
2020-08-23			Fall Kite Event	Web Site Sales	Majectic Beaut	90.94
2020-06-02			Festival of Flight	E-mail Coupon	Sunshine	20.95
2020-05-22			None	Web Site Sales	Sunshine	20.68
2020-06-14			Festival of Flight	In Store Sales	Sunset	68.73
2020-08-31			None	Web Site Sales	Sunbell	456.63
2020-08-21			Fall Kite Event	In Store Sales	Quad	102.35
2020-08-08			Fall Kite Event	In Store Sales	Sunbell	23.82
2020-06-05			Festival of Flight	Web Site Sales	Quad	66.35
2020-09-22			None	Web Site Sales	Quad	68.31
2020-08-09			Fall Kite Event	In Store Sales	Sunbell	75.11
2020-08-04			Fall Kite Event	Web Site Sales	Quad	68.13
2020-08-03			Fall Kite Event	In Store Sales	Quad	33.06
2020-08-07			Fall Kite Event	Web Site Sales	Sunbell	24.11
2020-08-03			Fall Kite Event	In Store Sales	Sunset	47.02
2020-08-29			Fall Kite Event	Web Site Sales	Aspen	38.88
2020-08-17			Fall Kite Event	E-mail Coupon	Sunset	424.33
2020-05-11			None	Web Site Sales	Sunshine	40.93
2020-08-28			Fall Kite Event	In Store Sales	Crested Beaut	48.24
2020-06-26			Festival of Flight	Web Site Sales	Quad	102.29
2020-09-26			None	Web Site Sales	Carlota	92.2
2020-06-23			Festival of Flight	Web Site Sales	Carlota	46.33
2020-08-20			Fall Kite Event	In Store Sales	Sunshine	40.55
2020-08-19			Fall Kite Event	Web Site Sales	Quad	66.57
2020-05-23			None	In Store Sales	Crested Beaut	72.52
2020-08-26			Fall Kite Event	Web Site Sales	Quad	66.85
2020-06-09			Festival of Flight	In Store Sales	Sunset	47.86
2020-05-24			None	E-mail Coupon	Doublers	160.63
2020-08-21			Fall Kite Event	E-mail Coupon	Sunbell	75.06
2020-08-13			Fall Kite Event	Web Site Sales	Quad	66.45
2020-06-21			Festival of Flight	Web Site Sales	Carlota	23.85
2020-08-12			Fall Kite Event	Web Site Sales	Carlota	23.49
2020-08-18			Fall Kite Event	In Store Sales	Sunbell	72.64
2020-08-04			Fall Kite Event	In Store Sales	Doublers	320.73
2020-05-13			None	E-mail Coupon	Sunbell	48.58
2020-08-26			Fall Kite Event	In Store Sales	Bellen	23.35
2020-08-21			Fall Kite Event	E-mail Coupon	Quad	99.1
2020-08-29			Fall Kite Event	In Store Sales	Bellen	46.34
2020-06-27			Festival of Flight	In Store Sales	Quad	68.2
2020-07-04			None	Web Site Sales	Doublers	160.19
2020-08-27			Fall Kite Event	E-mail Coupon	Quad	34.95
2020-08-31			None	In Store Sales	Sunshine	20.39
2020-06-14			Festival of Flight	Web Site Sales	Quad	549.31
2020-07-25			None	Web Site Sales	Doublers	240.27
2020-06-20			Festival of Flight	Web Site Sales	Carlota	69.11
2020-07-26			None	In Store Sales	Carlota	44.59
2020-08-24			Fall Kite Event	In Store Sales	Quad	68.65
2020-06-02			Festival of Flight	Web Site Sales	Sunbell	24.83
2020-06-07			Festival of Flight	Web Site Sales	Majectic Beaut	28.88
2020-08-03			Fall Kite Event	Web Site Sales	Majectic Beaut	87.73
2020-08-28			Fall Kite Event	In Store Sales	Aspen	42.53
2020-05-28			None	Web Site Sales	Doublers	240.01
2020-08-11			Fall Kite Event	In Store Sales	Sunshine	40.41
2020-08-21			Fall Kite Event	Web Site Sales	Aspen	38.68
2020-08-11			Fall Kite Event	In Store Sales	Sunbell	46.17
2020-08-24			Fall Kite Event	Web Site Sales	Bellen	22.7
2020-08-12			Fall Kite Event	In Store Sales	Aspen	60.17
2020-09-16			None	In Store Sales	Quad	99.79
2020-06-03			Festival of Flight	Web Site Sales	Sunbell	24.1
2020-08-24			Fall Kite Event	In Store Sales	Carlota	46.93
2020-08-07			Fall Kite Event	In Store Sales	Sunshine	100.09
2020-05-19			None	In Store Sales	Bellen	66.88
2020-05-12			None	Web Site Sales	Quad	34.71
2020-08-05			Fall Kite Event	In Store Sales	Sunset	71.4
2020-06-29			None	Web Site Sales	V-Rang	36.27
2020-07-16			None	In Store Sales	Sunbell	75.9
2020-06-20			Festival of Flight	Web Site Sales	Sunshine	40.99
2020-05-25			None	Web Site Sales	Carlota	46.06
2020-06-09			Festival of Flight	Web Site Sales	Quad	66.27
2020-07-24			None	Web Site Sales	Crested Beaut	72.66
2020-06-11			Festival of Flight	E-mail Coupon	Quad	170.23
2020-08-02			Fall Kite Event	Web Site Sales	Doublers	160.79
2020-08-15			Fall Kite Event	In Store Sales	Sunbell	69.88
2020-08-10			Fall Kite Event	Web Site Sales	Majectic Beaut	29.03
2020-08-18			Fall Kite Event	In Store Sales	Sunbell	48.12
2020-06-28			None	Web Site Sales	Majectic Beaut	60.99
2020-08-22			Fall Kite Event	In Store Sales	Quad	96.19
2020-08-02			Fall Kite Event	Web Site Sales	Quad	99.33
2020-05-12			None	Web Site Sales	Aspen	63.09
2020-08-28			Fall Kite Event	Web Site Sales	Sunshine	60.02
2020-08-06			Fall Kite Event	In Store Sales	V-Rang	19.47
2020-06-03			Festival of Flight	Web Site Sales	Carlota	414.97
2020-06-15			Festival of Flight	Web Site Sales	Bellen	46.07
2020-06-09			Festival of Flight	In Store Sales	Majectic Beaut	399.27
2020-06-14			Festival of Flight	Web Site Sales	Majectic Beaut	120.5
2020-08-04			Fall Kite Event	Web Site Sales	Bellen	46.03
2020-06-19			Festival of Flight	In Store Sales	Sunshine	57.39
2020-05-05			None	E-mail Coupon	Bellen	69.67
2020-06-06			Festival of Flight	In Store Sales	Carlota	46.21
2020-08-08			Fall Kite Event	In Store Sales	Bellen	46.46
2020-08-15			Fall Kite Event	E-mail Coupon	Carlota	23.13
2020-08-20			Fall Kite Event	In Store Sales	Bellen	46.51
2020-06-04			Festival of Flight	E-mail Coupon	Aspen	20.56
2020-07-30			None	Web Site Sales	Sunset	71.09
2020-08-07			Fall Kite Event	In Store Sales	Crested Beaut	72.19
2020-08-04			Fall Kite Event	Web Site Sales	Sunbell	72.67
2020-08-03			Fall Kite Event	In Store Sales	FlatTop	27.27
2020-06-24			Festival of Flight	Web Site Sales	Sunshine	60.59
2020-06-10			Festival of Flight	Web Site Sales	Bellen	23.48
2020-08-26			Fall Kite Event	Web Site Sales	Majectic Beaut	579.64
2020-08-09			Fall Kite Event	In Store Sales	Carlota	23.77
2020-09-19			None	Web Site Sales	Carlota	66.06
2020-08-05			Fall Kite Event	In Store Sales	Carlota	334.32
2020-06-26			Festival of Flight	Web Site Sales	Doublers	152.08
2020-06-15			Festival of Flight	In Store Sales	Quad	66.45
2020-08-16			Fall Kite Event	Web Site Sales	Bellen	23.97
2020-08-07			Fall Kite Event	In Store Sales	Carlota	66.71
2020-09-24			None	In Store Sales	Quad	711.07
2020-05-10			None	Web Site Sales	Quad	68.1
2020-06-28			None	Web Site Sales	Majectic Beaut	90.4
2020-07-10			None	In Store Sales	Quad	68.43
2020-07-22			None	Web Site Sales	Sunbell	75.88
2020-08-07			Fall Kite Event	In Store Sales	Sunbell	100.81
2020-08-06			Fall Kite Event	Web Site Sales	Majectic Beaut	58.45
2020-06-07			Festival of Flight	Web Site Sales	Sunshine	20.72
2020-08-07			Fall Kite Event	Web Site Sales	Aspen	40.53
2020-05-19			None	In Store Sales	Majectic Beaut	87.67
2020-06-08			Festival of Flight	Web Site Sales	Quad	102.13
2020-06-28			None	In Store Sales	Sunset	513.49
2020-06-21			Festival of Flight	Web Site Sales	Majectic Beaut	28.03
2020-08-25			Fall Kite Event	In Store Sales	Bellen	69
2020-08-01			None	Web Site Sales	Majectic Beaut	661.04
2020-08-30			None	In Store Sales	Bellen	23.67
2020-06-16			Festival of Flight	Web Site Sales	Bellen	46.56
2020-06-08			Festival of Flight	In Store Sales	Bellen	23.9
2020-08-09			Fall Kite Event	In Store Sales	Doublers	160.35
2020-06-25			Festival of Flight	Web Site Sales	Doublers	240.49
2020-06-19			Festival of Flight	E-mail Coupon	Carlota	46.12
2020-08-18			Fall Kite Event	In Store Sales	Majectic Beaut	29.79
2020-08-25			Fall Kite Event	Web Site Sales	Doublers	240.57
2020-06-07			Festival of Flight	In Store Sales	Sunshine	40.66
2020-06-06			Festival of Flight	In Store Sales	Sunshine	60.15
2020-08-14			Fall Kite Event	In Store Sales	Doublers	240.69
2020-06-16			Festival of Flight	In Store Sales	Carlota	46.89
2020-08-24			Fall Kite Event	In Store Sales	Sunshine	20.39
2020-08-03			Fall Kite Event	In Store Sales	Quad	66.39
2020-08-17			Fall Kite Event	In Store Sales	Quad	96.01
2020-08-21			Fall Kite Event	Web Site Sales	Carlota	46.03
2020-06-04			Festival of Flight	Web Site Sales	Crested Beaut	25.91
2020-06-06			Festival of Flight	E-mail Coupon	Carlota	305.52
2020-06-23			Festival of Flight	Web Site Sales	Quad	198.99
2020-08-08			Fall Kite Event	Web Site Sales	Bellen	523.39
2020-06-08			Festival of Flight	In Store Sales	Crested Beaut	50.31
2020-05-05			None	Web Site Sales	Sunset	514.02
2020-08-12			Fall Kite Event	In Store Sales	Majectic Beaut	58.12
2020-09-22			None	E-mail Coupon	Sunset	23.24
2020-06-09			Festival of Flight	Web Site Sales	Bellen	46.76
2020-06-27			Festival of Flight	In Store Sales	Bellen	69.53
2020-08-22			Fall Kite Event	In Store Sales	Sunshine	60.42
2020-06-19			Festival of Flight	Web Site Sales	Crested Beaut	48.29
2020-08-19			Fall Kite Event	In Store Sales	V-Rang	38.15
2020-08-24			Fall Kite Event	Web Site Sales	Quad	608.86
2020-06-16			Festival of Flight	Web Site Sales	Bellen	23.21
2020-06-18			Festival of Flight	Web Site Sales	Sunshine	40.42
2020-08-24			Fall Kite Event	E-mail Coupon	Carlota	46.45
2020-05-23			None	Web Site Sales	Quad	34.47
2020-06-25			Festival of Flight	Web Site Sales	Majectic Beaut	58.2
2020-07-14			None	In Store Sales	Sunset	363.9
2020-06-20			Festival of Flight	Web Site Sales	Quad	66.46
2020-06-17			Festival of Flight	In Store Sales	Carlota	46.2
2020-08-11			Fall Kite Event	In Store Sales	Sunshine	20.7
2020-09-20			None	Web Site Sales	Sunbell	48.29
2020-08-28			Fall Kite Event	In Store Sales	Sunshine	379.58
2020-08-19			Fall Kite Event	Web Site Sales	Bellen	23.84
2020-08-07			Fall Kite Event	In Store Sales	Sunshine	38.62
2020-08-19			Fall Kite Event	In Store Sales	Sunset	24.68
2020-06-23			Festival of Flight	In Store Sales	Quad	66.98
2020-06-30			None	Web Site Sales	Sunbell	50.45
2020-05-17			None	Web Site Sales	Aspen	60.4
2020-06-18			Festival of Flight	Web Site Sales	Carlota	46.65
2020-08-10			Fall Kite Event	In Store Sales	Sunbell	184.91
2020-06-12			Festival of Flight	In Store Sales	Carlota	69.7
2020-06-02			Festival of Flight	Web Site Sales	Bellen	46.06
2020-07-13			None	Web Site Sales	Carlota	22.79
2020-08-12			Fall Kite Event	In Store Sales	Quad	99.38
2020-06-15			Festival of Flight	In Store Sales	Carlota	23.61
2020-06-15			Festival of Flight	In Store Sales	Quad	102.39
2020-06-08			Festival of Flight	E-mail Coupon	Aspen	80.18
2020-06-10			Festival of Flight	Web Site Sales	Sunshine	40.35
2020-06-27			Festival of Flight	Web Site Sales	Carlota	436
2020-07-16			None	Web Site Sales	Aspen	60.23
2020-08-26			Fall Kite Event	Web Site Sales	Doublers	228.56
2020-08-27			Fall Kite Event	In Store Sales	Sunbell	48.14
2020-08-28			Fall Kite Event	Web Site Sales	Sunshine	40.35
2020-06-17			Festival of Flight	In Store Sales	Carlota	69.96
2020-08-07			Fall Kite Event	Web Site Sales	Majectic Beaut	58.3
2020-08-09			Fall Kite Event	In Store Sales	Quad	132.06
2020-06-25			Festival of Flight	In Store Sales	Bellen	92.87
2020-05-04			None	In Store Sales	Sunshine	60.03
2020-05-29			None	In Store Sales	Sunset	71.84
2020-06-01			Festival of Flight	Web Site Sales	Crested Beaut	24.49
2020-08-15			Fall Kite Event	Web Site Sales	Sunbell	125.78
2020-08-12			Fall Kite Event	In Store Sales	Sunbell	23.92
2020-06-09			Festival of Flight	Web Site Sales	Carlota	46.42
2020-06-30			None	Web Site Sales	Quad	32.96
2020-07-14			None	Web Site Sales	Aspen	60.85
2020-08-09			Fall Kite Event	In Store Sales	Sunbell	23.13
2020-06-29			None	In Store Sales	Crested Beaut	48.51
2020-08-20			Fall Kite Event	In Store Sales	Sunbell	75.92
2020-09-04			None	Web Site Sales	Sunshine	38.51
2020-06-02			Festival of Flight	In Store Sales	Carlota	46.77
2020-08-10			Fall Kite Event	In Store Sales	Bellen	92.26
2020-08-30			None	In Store Sales	Sunshine	20.78
2020-06-13			Festival of Flight	E-mail Coupon	Sunset	71.64
2020-06-09			Festival of Flight	Web Site Sales	Bellen	66.82
2020-08-02			Fall Kite Event	In Store Sales	Sunshine	60.24
2020-06-26			Festival of Flight	Web Site Sales	Majectic Beaut	116.11
2020-08-30			None	E-mail Coupon	FlatTop	28.5
2020-08-29			Fall Kite Event	In Store Sales	Carlota	69.54
2020-05-11			None	In Store Sales	Bellen	44.77
2020-06-10			Festival of Flight	Web Site Sales	Bellen	46.79
2020-06-26			Festival of Flight	Web Site Sales	Sunshine	19.5
2020-08-23			Fall Kite Event	In Store Sales	Bellen	46.42
2020-06-10			Festival of Flight	In Store Sales	Aspen	60.36
2020-07-23			None	Web Site Sales	Majectic Beaut	87.89
2020-08-17			Fall Kite Event	Web Site Sales	Sunshine	60.19
2020-08-29			Fall Kite Event	In Store Sales	Quad	66.76
2020-08-10			Fall Kite Event	Web Site Sales	Sunbell	75.96
2020-08-15			Fall Kite Event	In Store Sales	Sunshine	38.38
2020-08-08			Fall Kite Event	In Store Sales	Sunbell	50.56
2020-05-25			None	Web Site Sales	Carlota	46.8
2020-06-17			Festival of Flight	Web Site Sales	Carlota	46.74
2020-06-05			Festival of Flight	Web Site Sales	V-Rang	38.09
2020-05-19			None	Web Site Sales	Carlota	23.7
2020-08-16			Fall Kite Event	In Store Sales	Carlota	69.17
2020-07-01			None	In Store Sales	Sunshine	20.07
2020-07-02			None	E-mail Coupon	Sunshine	20.4
2020-06-11			Festival of Flight	Web Site Sales	Majectic Beaut	30.14
2020-06-27			Festival of Flight	Web Site Sales	Sunshine	60.85
2020-09-18			None	Web Site Sales	Carlota	23
2020-08-06			Fall Kite Event	E-mail Coupon	Sunshine	20.13
2020-08-30			None	Web Site Sales	Crested Beaut	50.15
2020-06-20			Festival of Flight	Web Site Sales	Majectic Beaut	58.02
2020-09-11			None	Web Site Sales	Sunbell	50.49
2020-08-07			Fall Kite Event	In Store Sales	Doublers	240.64
2020-06-16			Festival of Flight	Web Site Sales	Sunbell	48.52
2020-08-10			Fall Kite Event	In Store Sales	Carlota	46.42
2020-09-11			None	In Store Sales	Bellen	46.91
2020-08-16			Fall Kite Event	In Store Sales	Quad	33.12
2020-06-21			Festival of Flight	Web Site Sales	FlatTop	55.38
2020-08-07			Fall Kite Event	E-mail Coupon	Quad	33.01
2020-05-21			None	E-mail Coupon	Sunshine	40.51
2020-07-18			None	Web Site Sales	Bellen	46.83
2020-06-05			Festival of Flight	Web Site Sales	Quad	64.58
2020-06-28			None	In Store Sales	Sunset	23.73
2020-07-19			None	Web Site Sales	Quad	533.77
2020-08-12			Fall Kite Event	In Store Sales	Quad	66.47
2020-08-19			Fall Kite Event	Web Site Sales	Carlota	69.93
2020-08-31			None	E-mail Coupon	Sunset	24.29
2020-08-16			Fall Kite Event	Web Site Sales	Quad	33.9
2020-08-01			None	In Store Sales	Sunset	23.04
2020-06-18			Festival of Flight	Web Site Sales	Quad	68.12
2020-08-26			Fall Kite Event	In Store Sales	FlatTop	55.47
2020-09-21			None	In Store Sales	Aspen	21.78
2020-06-06			Festival of Flight	Web Site Sales	Carlota	154.74
2020-06-02			Festival of Flight	Web Site Sales	Quad	64.26
2020-08-30			None	In Store Sales	Sunbell	72.85
2020-08-21			Fall Kite Event	Web Site Sales	Sunshine	20.51
2020-06-29			None	Web Site Sales	Majectic Beaut	56.81
2020-08-18			Fall Kite Event	Web Site Sales	Carlota	69.49
2020-05-04			None	In Store Sales	Aspen	38.38
2020-06-06			Festival of Flight	Web Site Sales	Carlota	46.83
2020-08-16			Fall Kite Event	In Store Sales	Sunshine	80.09
2020-06-09			Festival of Flight	E-mail Coupon	Majectic Beaut	29.98
2020-06-16			Festival of Flight	In Store Sales	Sunshine	40.22
2020-06-30			None	In Store Sales	Carlota	69.61
2020-05-28			None	Web Site Sales	Sunbell	75.72
2020-08-27			Fall Kite Event	E-mail Coupon	Carlota	44.63
2020-06-20			Festival of Flight	Web Site Sales	Quad	66.64
2020-08-03			Fall Kite Event	In Store Sales	Quad	102.7
2020-06-12			Festival of Flight	Web Site Sales	Majectic Beaut	90.32
2020-06-08			Festival of Flight	In Store Sales	Sunshine	20.99
2020-05-03			None	Web Site Sales	Majectic Beaut	523.23
2020-08-25			Fall Kite Event	Web Site Sales	Aspen	38.64
2020-08-11			Fall Kite Event	In Store Sales	Sunshine	76.41
2020-08-21			Fall Kite Event	In Store Sales	Majectic Beaut	29.83
2020-06-29			None	Web Site Sales	Sunbell	72.44
2020-08-20			Fall Kite Event	Web Site Sales	Doublers	1629.58
2020-08-09			Fall Kite Event	E-mail Coupon	Sunshine	60.32
2020-08-15			Fall Kite Event	Web Site Sales	V-Rang	36.17
2020-06-17			Festival of Flight	In Store Sales	Majectic Beaut	58.4
2020-08-03			Fall Kite Event	Web Site Sales	FlatTop	83.71
2020-08-09			Fall Kite Event	In Store Sales	V-Rang	235.88
2020-08-24			Fall Kite Event	Web Site Sales	Sunset	47.76
2020-06-11			Festival of Flight	In Store Sales	Quad	96.87
2020-07-04			None	In Store Sales	Sunshine	60.11
2020-06-12			Festival of Flight	In Store Sales	Quad	66.43
2020-08-26			Fall Kite Event	In Store Sales	Majectic Beaut	29.07
2020-08-11			Fall Kite Event	In Store Sales	Sunshine	40.41
2020-08-25			Fall Kite Event	Web Site Sales	Quad	66.04
2020-08-03			Fall Kite Event	In Store Sales	FlatTop	28.05
2020-06-24			Festival of Flight	E-mail Coupon	Sunshine	60.43
2020-08-14			Fall Kite Event	In Store Sales	Aspen	63.09
2020-08-29			Fall Kite Event	In Store Sales	Sunbell	24.12
2020-06-02			Festival of Flight	E-mail Coupon	Bellen	46.11
2020-06-14			Festival of Flight	Web Site Sales	Sunset	90.79
2020-07-14			None	In Store Sales	Majectic Beaut	60.48
2020-05-01			None	Web Site Sales	Bellen	69.27
2020-06-15			Festival of Flight	E-mail Coupon	FlatTop	353.19
2020-07-06			None	In Store Sales	Majectic Beaut	56.2
2020-07-04			None	Web Site Sales	Sunbell	72.91
2020-06-26			Festival of Flight	Web Site Sales	Crested Beaut	23.06
2020-06-04			Festival of Flight	Web Site Sales	Sunshine	40.16
2020-08-23			Fall Kite Event	E-mail Coupon	Sunshine	40.81
2020-08-15			Fall Kite Event	In Store Sales	Carlota	69.27
2020-05-11			None	In Store Sales	Sunshine	38.28
2020-06-19			Festival of Flight	Web Site Sales	Carlota	371.36
2020-06-03			Festival of Flight	Web Site Sales	V-Rang	36.41
2020-06-10			Festival of Flight	In Store Sales	Majectic Beaut	30.96
2020-08-27			Fall Kite Event	Web Site Sales	Aspen	60.33
2020-07-25			None	Web Site Sales	Bellen	44.83
2020-08-21			Fall Kite Event	Web Site Sales	Aspen	21.18
2020-06-04			Festival of Flight	Web Site Sales	Quad	64.23
2020-08-20			Fall Kite Event	Web Site Sales	Quad	66.1
2020-06-13			Festival of Flight	Web Site Sales	Bellen	23.82
2020-06-09			Festival of Flight	In Store Sales	Bellen	46.42
2020-06-09			Festival of Flight	Web Site Sales	Aspen	60.84
2020-06-14			Festival of Flight	Web Site Sales	Carlota	230.77
2020-08-17			Fall Kite Event	In Store Sales	Carlota	46.1
2020-08-02			Fall Kite Event	In Store Sales	Sunshine	40.31
2020-07-30			None	Web Site Sales	Bellen	46.44
2020-05-19			None	In Store Sales	Bellen	69.92
2020-08-08			Fall Kite Event	In Store Sales	Quad	99.88
2020-07-08			None	Web Site Sales	Quad	102.42
2020-05-03			None	Web Site Sales	Quad	33.2
2020-07-12			None	E-mail Coupon	Bellen	23.69
2020-06-11			Festival of Flight	Web Site Sales	Carlota	69.89
2020-08-11			Fall Kite Event	In Store Sales	Aspen	60.59
2020-08-15			Fall Kite Event	In Store Sales	Quad	33.63
2020-07-04			None	E-mail Coupon	V-Rang	18.03
2020-08-26			Fall Kite Event	In Store Sales	Crested Beaut	50.79
2020-08-18			Fall Kite Event	E-mail Coupon	Sunshine	40.17
2020-08-17			Fall Kite Event	In Store Sales	Sunshine	60.31
2020-07-28			None	Web Site Sales	V-Rang	291.74
2020-06-10			Festival of Flight	Web Site Sales	Sunbell	479.83
2020-06-04			Festival of Flight	In Store Sales	Bellen	46.96
2020-06-25			Festival of Flight	In Store Sales	Bellen	414.39
2020-06-16			Festival of Flight	In Store Sales	Sunshine	20.09
2020-08-05			Fall Kite Event	In Store Sales	Majectic Beaut	28.05
2020-08-27			Fall Kite Event	Web Site Sales	Bellen	69.24
2020-06-18			Festival of Flight	Web Site Sales	Bellen	46.02
2020-08-12			Fall Kite Event	Web Site Sales	Quad	99.06
2020-08-20			Fall Kite Event	In Store Sales	Quad	128.77
2020-08-13			Fall Kite Event	In Store Sales	Doublers	80.52
2020-06-30			None	E-mail Coupon	Bellen	46.66
2020-06-04			Festival of Flight	Web Site Sales	Quad	34.56
2020-08-20			Fall Kite Event	In Store Sales	FlatTop	83.26
2020-05-11			None	Web Site Sales	Sunbell	24.98
2020-07-31			None	Web Site Sales	Majectic Beaut	29.03
2020-08-14			Fall Kite Event	Web Site Sales	Sunshine	57.46
2020-06-18			Festival of Flight	Web Site Sales	Sunbell	50.96
2020-05-08			None	Web Site Sales	Crested Beaut	50.94
2020-05-16			None	In Store Sales	Sunshine	80.92
2020-07-29			None	In Store Sales	Majectic Beaut	627.74
2020-09-06			None	Web Site Sales	Quad	68.6
2020-08-18			Fall Kite Event	E-mail Coupon	Majectic Beaut	28.42
2020-06-25			Festival of Flight	Web Site Sales	Sunbell	24.63
2020-06-26			Festival of Flight	Web Site Sales	Bellen	69.85
2020-08-02			Fall Kite Event	In Store Sales	Sunset	357.01
2020-08-12			Fall Kite Event	Web Site Sales	Aspen	361.57
2020-07-31			None	In Store Sales	Bellen	46.48
2020-09-28			None	Web Site Sales	V-Rang	19.42
2020-06-22			Festival of Flight	Web Site Sales	Bellen	69.89
2020-08-04			Fall Kite Event	Web Site Sales	Majectic Beaut	29.71
2020-06-22			Festival of Flight	Web Site Sales	Quad	132.71
2020-06-10			Festival of Flight	E-mail Coupon	Carlota	46.05
2020-06-25			Festival of Flight	Web Site Sales	Quad	68.14
2020-05-07			None	In Store Sales	Quad	99.54
2020-08-31			None	In Store Sales	Quad	99.9
2020-06-21			Festival of Flight	Web Site Sales	Sunbell	69.7
2020-08-11			Fall Kite Event	In Store Sales	Quad	66.4
2020-05-27			None	E-mail Coupon	Sunshine	80.04
2020-08-14			Fall Kite Event	In Store Sales	V-Rang	57.55
2020-08-11			Fall Kite Event	Web Site Sales	Bellen	46.61
2020-08-14			Fall Kite Event	In Store Sales	Sunshine	20.64
2020-08-01			None	In Store Sales	Quad	68.99
2020-07-09			None	Web Site Sales	Carlota	69.37
2020-07-13			None	Web Site Sales	Doublers	80.55
2020-08-07			Fall Kite Event	In Store Sales	FlatTop	80.15
2020-06-30			None	Web Site Sales	Aspen	20.86
2020-07-08			None	In Store Sales	Sunbell	92.02
2020-06-14			Festival of Flight	Web Site Sales	Quad	136.16
2020-06-30			None	E-mail Coupon	Sunset	406.37
2020-06-30			None	Web Site Sales	Carlota	22.12
2020-06-14			Festival of Flight	Web Site Sales	Sunset	94.75
2020-06-07			Festival of Flight	Web Site Sales	Quad	99.43
2020-07-22			None	E-mail Coupon	Bellen	46.48
2020-08-10			Fall Kite Event	In Store Sales	Bellen	23.49
2020-06-19			Festival of Flight	In Store Sales	Sunshine	38.98
2020-08-26			Fall Kite Event	Web Site Sales	Quad	32.01
2020-08-01			None	In Store Sales	FlatTop	496.26
2020-08-17			Fall Kite Event	E-mail Coupon	Carlota	69.11
2020-06-09			Festival of Flight	In Store Sales	Carlota	46.92
2020-06-14			Festival of Flight	Web Site Sales	Sunshine	19.93
2020-06-30			None	Web Site Sales	V-Rang	57.54
2020-09-02			None	Web Site Sales	Sunshine	160.07
2020-09-04			None	E-mail Coupon	Quad	132.12
2020-06-29			None	In Store Sales	Sunshine	341.17
2020-05-04			None	Web Site Sales	Sunbell	23.93
2020-06-10			Festival of Flight	E-mail Coupon	Crested Beaut	50.36
2020-08-18			Fall Kite Event	In Store Sales	Quad	102.49
2020-06-16			Festival of Flight	Web Site Sales	Quad	66.41
2020-08-17			Fall Kite Event	In Store Sales	Majectic Beaut	28.58
2020-08-30			None	Web Site Sales	Sunset	24.26
2020-08-03			Fall Kite Event	In Store Sales	Crested Beaut	69.52
2020-08-14			Fall Kite Event	Web Site Sales	Sunbell	69.86
2020-06-07			Festival of Flight	In Store Sales	FlatTop	28.4
2020-08-20			Fall Kite Event	In Store Sales	Aspen	19.69
2020-06-17			Festival of Flight	Web Site Sales	V-Rang	38.35
2020-08-04			Fall Kite Event	In Store Sales	Aspen	42.8
2020-06-24			Festival of Flight	Web Site Sales	Sunbell	48.82
2020-06-14			Festival of Flight	In Store Sales	Aspen	57.91
2020-08-05			Fall Kite Event	In Store Sales	Aspen	60.43
2020-06-11			Festival of Flight	Web Site Sales	Carlota	70
2020-07-27			None	Web Site Sales	Sunbell	72.58
2020-06-25			Festival of Flight	In Store Sales	Quad	68.63
2020-06-22			Festival of Flight	In Store Sales	Bellen	23.17
2020-06-28			None	Web Site Sales	V-Rang	57.22
2020-06-05			Festival of Flight	Web Site Sales	Sunbell	96.2
2020-08-08			Fall Kite Event	In Store Sales	Carlota	69.31
2020-06-22			Festival of Flight	In Store Sales	Sunshine	60.43
2020-06-19			Festival of Flight	In Store Sales	Doublers	160
2020-08-23			Fall Kite Event	In Store Sales	Quad	68.37
2020-06-13			Festival of Flight	In Store Sales	FlatTop	28.39
2020-06-13			Festival of Flight	E-mail Coupon	FlatTop	80.81
2020-07-20			None	In Store Sales	Sunshine	60.74
2020-06-02			Festival of Flight	In Store Sales	Sunshine	40.72
2020-06-10			Festival of Flight	Web Site Sales	Carlota	23.63
2020-06-30			None	Web Site Sales	Quad	132.34
2020-06-25			Festival of Flight	Web Site Sales	Doublers	160.32
2020-06-21			Festival of Flight	In Store Sales	Quad	96.94
2020-06-16			Festival of Flight	E-mail Coupon	Crested Beaut	69.14
2020-08-27			Fall Kite Event	In Store Sales	Carlota	46.76
2020-08-16			Fall Kite Event	Web Site Sales	Quad	68.98
2020-06-02			Festival of Flight	Web Site Sales	Sunbell	100.9
2020-08-29			Fall Kite Event	In Store Sales	Bellen	46.46
2020-08-05			Fall Kite Event	In Store Sales	Bellen	69.53
2020-08-01			None	Web Site Sales	Quad	533.53
2020-06-18			Festival of Flight	Web Site Sales	Bellen	46.41
2020-08-13			Fall Kite Event	Web Site Sales	Bellen	46.26
2020-05-25			None	Web Site Sales	Crested Beaut	120.58
2020-06-04			Festival of Flight	E-mail Coupon	Carlota	46.63
2020-06-23			Festival of Flight	E-mail Coupon	Doublers	160.41
2020-08-18			Fall Kite Event	E-mail Coupon	Quad	128.77
2020-09-16			None	Web Site Sales	Quad	33.89
2020-05-03			None	Web Site Sales	Sunshine	20.48
2020-08-20			Fall Kite Event	In Store Sales	Quad	68.6
2020-07-21			None	In Store Sales	Sunbell	168.36
2020-05-21			None	In Store Sales	Quad	99.75
2020-07-25			None	Web Site Sales	Sunbell	24.32
2020-08-12			Fall Kite Event	E-mail Coupon	Majectic Beaut	90.31
2020-07-21			None	Web Site Sales	Sunbell	23.7
2020-09-22			None	Web Site Sales	Quad	66.59
2020-08-22			Fall Kite Event	Web Site Sales	Sunbell	25.01
2020-09-14			None	Web Site Sales	Quad	33.48
2020-05-11			None	Web Site Sales	Crested Beaut	48.88
2020-08-17			Fall Kite Event	In Store Sales	Quad	66.66
2020-06-15			Festival of Flight	Web Site Sales	V-Rang	38.66
2020-09-17			None	Web Site Sales	Bellen	46.28
2020-05-01			None	E-mail Coupon	Doublers	78.44
2020-06-25			Festival of Flight	Web Site Sales	FlatTop	80.99
2020-06-13			Festival of Flight	Web Site Sales	Quad	68.4
2020-09-15			None	Web Site Sales	Carlota	92.84
2020-08-08			Fall Kite Event	Web Site Sales	Quad	136.28
2020-06-13			Festival of Flight	Web Site Sales	Quad	66.4
2020-08-25			Fall Kite Event	In Store Sales	Sunshine	19.01
2020-07-01			None	Web Site Sales	Crested Beaut	72.96
2020-07-26			None	In Store Sales	Bellen	46.81
2020-06-06			Festival of Flight	In Store Sales	Aspen	40.93
2020-08-17			Fall Kite Event	Web Site Sales	Sunbell	72.83
2020-06-21			Festival of Flight	In Store Sales	Sunset	24.73
2020-06-21			Festival of Flight	Web Site Sales	Majectic Beaut	112.69
2020-08-22			Fall Kite Event	In Store Sales	Quad	68.27
2020-08-07			Fall Kite Event	E-mail Coupon	Bellen	44.6
2020-08-04			Fall Kite Event	E-mail Coupon	Crested Beaut	72.05
2020-06-18			Festival of Flight	In Store Sales	Quad	66.4
2020-08-07			Fall Kite Event	In Store Sales	FlatTop	53.25
2020-08-31			None	Web Site Sales	Carlota	46.41
2020-05-30			None	E-mail Coupon	Majectic Beaut	58.09
2020-06-20			Festival of Flight	E-mail Coupon	Crested Beaut	75.83
2020-06-01			Festival of Flight	E-mail Coupon	Bellen	46.56
2020-08-25			Fall Kite Event	Web Site Sales	Majectic Beaut	116.59
2020-08-28			Fall Kite Event	In Store Sales	FlatTop	28.4
2020-08-29			Fall Kite Event	In Store Sales	Carlota	523.75
2020-06-17			Festival of Flight	Web Site Sales	Majectic Beaut	84.91
2020-06-11			Festival of Flight	Web Site Sales	Carlota	46.03
2020-08-13			Fall Kite Event	In Store Sales	Crested Beaut	404.81
2020-06-11			Festival of Flight	E-mail Coupon	Sunbell	48.73
2020-07-13			None	E-mail Coupon	Sunbell	25.89
2020-08-09			Fall Kite Event	Web Site Sales	Bellen	23.14
2020-06-24			Festival of Flight	In Store Sales	Carlota	66.36
2020-08-25			Fall Kite Event	Web Site Sales	V-Rang	36.28
2020-06-01			Festival of Flight	Web Site Sales	Sunset	118.63
2020-08-17			Fall Kite Event	In Store Sales	Majectic Beaut	87.53
2020-06-08			Festival of Flight	Web Site Sales	Aspen	40.99
2020-09-27			None	In Store Sales	Quad	99.79
2020-08-08			Fall Kite Event	In Store Sales	Crested Beaut	50.16
2020-08-18			Fall Kite Event	Web Site Sales	Aspen	57.47
2020-08-16			Fall Kite Event	In Store Sales	Sunbell	24.48
2020-08-04			Fall Kite Event	Web Site Sales	Majectic Beaut	58.42
2020-08-16			Fall Kite Event	E-mail Coupon	Sunbell	24.93
2020-08-25			Fall Kite Event	E-mail Coupon	Sunbell	23.15
2020-08-18			Fall Kite Event	In Store Sales	Doublers	234.43
2020-06-29			None	Web Site Sales	Sunset	94.96
2020-08-05			Fall Kite Event	In Store Sales	Crested Beaut	69.39
2020-07-16			None	In Store Sales	Quad	102.68
2020-06-24			Festival of Flight	Web Site Sales	Sunset	23.13
2020-06-14			Festival of Flight	In Store Sales	Sunshine	40.2
2020-06-25			Festival of Flight	Web Site Sales	Quad	68.86
2020-06-23			Festival of Flight	In Store Sales	Sunbell	72.83
2020-08-19			Fall Kite Event	In Store Sales	Aspen	63.23
2020-07-16			None	In Store Sales	Sunshine	200.3
2020-06-15			Festival of Flight	In Store Sales	Sunbell	46.68
2020-06-03			Festival of Flight	In Store Sales	Sunbell	46.76
2020-08-20			Fall Kite Event	In Store Sales	Carlota	69.9
2020-08-07			Fall Kite Event	In Store Sales	Sunbell	46.68
2020-08-03			Fall Kite Event	In Store Sales	Quad	64.23
2020-05-13			None	E-mail Coupon	Carlota	46.17
2020-08-25			Fall Kite Event	E-mail Coupon	FlatTop	27.69
2020-08-09			Fall Kite Event	E-mail Coupon	FlatTop	55.55
2020-09-09			None	E-mail Coupon	FlatTop	83.78
2020-08-21			Fall Kite Event	In Store Sales	Sunshine	398.41
2020-07-08			None	Web Site Sales	Bellen	88.12
2020-06-13			Festival of Flight	In Store Sales	Bellen	46.64
2020-07-18			None	In Store Sales	Aspen	60.57
2020-08-27			Fall Kite Event	E-mail Coupon	Carlota	22.97
2020-06-11			Festival of Flight	Web Site Sales	Sunshine	133.43
2020-08-07			Fall Kite Event	E-mail Coupon	Sunshine	20.77
2020-08-31			None	In Store Sales	Quad	33.91
2020-07-13			None	Web Site Sales	Quad	96.68
2020-08-11			Fall Kite Event	In Store Sales	Majectic Beaut	58.23
2020-08-17			Fall Kite Event	In Store Sales	V-Rang	36.07
2020-06-02			Festival of Flight	Web Site Sales	Sunshine	324.43
2020-06-07			Festival of Flight	In Store Sales	Doublers	312.2
2020-05-19			None	In Store Sales	Carlota	44.81
2020-08-26			Fall Kite Event	In Store Sales	Bellen	22.71
2020-06-13			Festival of Flight	Web Site Sales	Sunbell	25.65
2020-05-12			None	In Store Sales	Quad	68.12
2020-06-09			Festival of Flight	Web Site Sales	Quad	33.91
2020-09-16			None	E-mail Coupon	Sunbell	48.56
2020-08-23			Fall Kite Event	In Store Sales	Quad	33.31
2020-06-08			Festival of Flight	In Store Sales	Aspen	40.55
2020-08-13			Fall Kite Event	In Store Sales	Aspen	180.99
2020-09-16			None	In Store Sales	Bellen	46.96
2020-08-18			Fall Kite Event	In Store Sales	Sunbell	72.2
2020-09-01			None	In Store Sales	Crested Beaut	25.98
2020-06-29			None	E-mail Coupon	Sunset	71.83
2020-06-17			Festival of Flight	Web Site Sales	Sunbell	72.12
2020-07-15			None	Web Site Sales	Doublers	160.36
2020-07-20			None	E-mail Coupon	Crested Beaut	72.63
2020-06-21			Festival of Flight	Web Site Sales	Sunshine	20.15
2020-08-01			None	Web Site Sales	Crested Beaut	25.32
2020-06-01			Festival of Flight	E-mail Coupon	Carlota	46.04
2020-08-15			Fall Kite Event	E-mail Coupon	Sunset	24
2020-06-11			Festival of Flight	In Store Sales	Sunshine	341.53
2020-06-22			Festival of Flight	Web Site Sales	Sunshine	20.79
2020-06-24			Festival of Flight	In Store Sales	Aspen	319.83
2020-06-22			Festival of Flight	In Store Sales	Quad	33.42
2020-06-23			Festival of Flight	In Store Sales	Carlota	46.2
2020-06-15			Festival of Flight	Web Site Sales	Quad	99.72
2020-06-02			Festival of Flight	In Store Sales	Carlota	46.08
2020-08-28			Fall Kite Event	In Store Sales	Sunbell	50.74
2020-06-29			None	In Store Sales	Sunshine	80.91
2020-08-21			Fall Kite Event	Web Site Sales	Carlota	69.49
2020-08-25			Fall Kite Event	In Store Sales	Carlota	501.98
2020-06-13			Festival of Flight	Web Site Sales	Sunbell	75.58
2020-08-09			Fall Kite Event	In Store Sales	Sunshine	20.76
2020-08-18			Fall Kite Event	Web Site Sales	Sunset	47.63
2020-08-18			Fall Kite Event	In Store Sales	Sunbell	72.35
2020-08-12			Fall Kite Event	Web Site Sales	Sunset	24.48
2020-06-14			Festival of Flight	Web Site Sales	Carlota	69.56
2020-08-18			Fall Kite Event	In Store Sales	Majectic Beaut	30.02
2020-06-02			Festival of Flight	Web Site Sales	Quad	272.19
2020-08-18			Fall Kite Event	Web Site Sales	Quad	33.22
2020-08-20			Fall Kite Event	In Store Sales	Sunbell	75.99
2020-06-18			Festival of Flight	E-mail Coupon	Sunset	71.26
2020-06-12			Festival of Flight	Web Site Sales	Bellen	46.42
2020-06-22			Festival of Flight	In Store Sales	Quad	34.99
2020-08-09			Fall Kite Event	In Store Sales	V-Rang	38.9
2020-06-19			Festival of Flight	Web Site Sales	Aspen	40.29
2020-06-02			Festival of Flight	Web Site Sales	Sunset	24.8
2020-08-01			None	In Store Sales	Sunbell	415.94
2020-08-06			Fall Kite Event	In Store Sales	Majectic Beaut	28.44
2020-06-04			Festival of Flight	In Store Sales	Bellen	46.69
2020-08-19			Fall Kite Event	In Store Sales	Sunbell	25.73
2020-06-04			Festival of Flight	Web Site Sales	Sunbell	48.45
2020-06-04			Festival of Flight	E-mail Coupon	Sunshine	38.01
2020-06-09			Festival of Flight	Web Site Sales	Carlota	46.92
2020-06-04			Festival of Flight	Web Site Sales	FlatTop	55.24
2020-05-03			None	In Store Sales	Majectic Beaut	60.46
2020-08-21			Fall Kite Event	In Store Sales	Bellen	23.86
2020-08-10			Fall Kite Event	In Store Sales	Bellen	46.98
2020-07-20			None	Web Site Sales	Quad	64.6
2020-08-21			Fall Kite Event	Web Site Sales	Aspen	40.39
2020-08-22			Fall Kite Event	In Store Sales	Quad	132.84
2020-08-09			Fall Kite Event	Web Site Sales	Sunset	23.43
2020-06-04			Festival of Flight	Web Site Sales	Quad	102.39
2020-08-28			Fall Kite Event	In Store Sales	Quad	33.28
2020-06-28			None	In Store Sales	Doublers	160.41
2020-06-11			Festival of Flight	In Store Sales	Sunshine	20.44
2020-06-28			None	Web Site Sales	Quad	68.74
2020-06-01			Festival of Flight	In Store Sales	Sunbell	75.5
2020-06-09			Festival of Flight	Web Site Sales	FlatTop	28.21
2020-08-09			Fall Kite Event	E-mail Coupon	Quad	102.96
2020-08-09			Fall Kite Event	In Store Sales	Sunshine	40.02
2020-06-17			Festival of Flight	In Store Sales	Bellen	69.61
2020-05-26			None	Web Site Sales	Carlota	92.89
2020-06-03			Festival of Flight	E-mail Coupon	Sunshine	40.26
2020-08-14			Fall Kite Event	In Store Sales	Aspen	40.96
2020-06-02			Festival of Flight	Web Site Sales	Sunbell	72.8
2020-08-24			Fall Kite Event	In Store Sales	Bellen	283.85
2020-05-05			None	Web Site Sales	Aspen	20.98
2020-06-25			Festival of Flight	In Store Sales	Quad	99.44
2020-06-07			Festival of Flight	Web Site Sales	Bellen	23.76
2020-08-29			Fall Kite Event	E-mail Coupon	Bellen	66.69
2020-07-31			None	Web Site Sales	Sunset	469.93
2020-06-30			None	Web Site Sales	Bellen	327.75
2020-08-27			Fall Kite Event	Web Site Sales	Bellen	46.38
2020-08-15			Fall Kite Event	In Store Sales	Sunbell	25.02
2020-06-13			Festival of Flight	Web Site Sales	Bellen	262.81
2020-08-23			Fall Kite Event	In Store Sales	Bellen	46.27
2020-05-08			None	In Store Sales	Sunset	23.24
2020-06-25			Festival of Flight	Web Site Sales	Carlota	46.08
2020-08-27			Fall Kite Event	E-mail Coupon	Quad	102.02
2020-06-20			Festival of Flight	Web Site Sales	Carlota	23.72
2020-06-22			Festival of Flight	Web Site Sales	Bellen	46.37
2020-08-19			Fall Kite Event	In Store Sales	Carlota	46.76
2020-06-14			Festival of Flight	In Store Sales	Sunset	71.87
2020-08-27			Fall Kite Event	In Store Sales	Sunbell	72.51
2020-06-02			Festival of Flight	Web Site Sales	Sunshine	20.45
2020-05-29			None	In Store Sales	Majectic Beaut	87.03
2020-07-03			None	Web Site Sales	Majectic Beaut	29.32
2020-08-11			Fall Kite Event	In Store Sales	Sunshine	19.4
2020-06-29			None	Web Site Sales	Carlota	69.73
2020-06-16			Festival of Flight	Web Site Sales	FlatTop	80.01
2020-06-24			Festival of Flight	E-mail Coupon	Crested Beaut	46.23
2020-08-05			Fall Kite Event	In Store Sales	Sunshine	40.41
2020-08-27			Fall Kite Event	In Store Sales	Sunshine	40.3
2020-08-30			None	In Store Sales	Sunset	94.64
2020-06-15			Festival of Flight	In Store Sales	Sunset	68.8
2020-08-03			Fall Kite Event	In Store Sales	Bellen	414.19
2020-06-23			Festival of Flight	In Store Sales	Quad	64.96
2020-06-09			Festival of Flight	In Store Sales	Majectic Beaut	60.08
2020-06-25			Festival of Flight	Web Site Sales	Sunbell	96.57
2020-08-30			None	In Store Sales	Bellen	480.04
2020-07-22			None	In Store Sales	Sunset	47.34
2020-05-30			None	In Store Sales	Sunshine	60.52
2020-05-25			None	Web Site Sales	FlatTop	83.73
2020-06-04			Festival of Flight	In Store Sales	Bellen	23.96
2020-08-03			Fall Kite Event	In Store Sales	Sunset	45.47
2020-06-23			Festival of Flight	Web Site Sales	Quad	99.9
2020-08-15			Fall Kite Event	Web Site Sales	Majectic Beaut	58.08
2020-08-25			Fall Kite Event	In Store Sales	Crested Beaut	92.98
2020-05-24			None	Web Site Sales	Aspen	40.12
2020-06-03			Festival of Flight	E-mail Coupon	Sunset	71.85
2020-05-29			None	Web Site Sales	Aspen	40.13
2020-06-18			Festival of Flight	In Store Sales	Crested Beaut	72.27
2020-08-15			Fall Kite Event	Web Site Sales	Majectic Beaut	87.88
2020-06-02			Festival of Flight	In Store Sales	Majectic Beaut	56.63
2020-08-04			Fall Kite Event	Web Site Sales	Quad	69
2020-08-13			Fall Kite Event	In Store Sales	Carlota	46.63
2020-06-23			Festival of Flight	E-mail Coupon	Sunbell	50.15
2020-05-27			None	E-mail Coupon	Quad	690.75
2020-09-20			None	E-mail Coupon	Quad	33.57
2020-08-26			Fall Kite Event	In Store Sales	Majectic Beaut	87.35
2020-09-17			None	Web Site Sales	Sunbell	24.6
2020-07-10			None	In Store Sales	Carlota	69.27
2020-06-23			Festival of Flight	Web Site Sales	Majectic Beaut	30.84
2020-09-01			None	Web Site Sales	Carlota	44.48
2020-06-04			Festival of Flight	Web Site Sales	Majectic Beaut	58.59
2020-08-06			Fall Kite Event	In Store Sales	Sunshine	40.05
2020-08-07			Fall Kite Event	Web Site Sales	Quad	66.22
2020-08-14			Fall Kite Event	In Store Sales	Quad	33.32
2020-08-09			Fall Kite Event	In Store Sales	Crested Beaut	25.17
2020-08-09			Fall Kite Event	In Store Sales	Quad	33.95
2020-08-26			Fall Kite Event	Web Site Sales	Sunshine	284
2020-08-30			None	In Store Sales	Sunbell	48.02
2020-08-31			None	Web Site Sales	Carlota	46.97
2020-08-07			Fall Kite Event	In Store Sales	Aspen	42.99
2020-07-18			None	In Store Sales	Sunbell	23.58
2020-06-20			Festival of Flight	In Store Sales	Bellen	46.4
2020-06-13			Festival of Flight	E-mail Coupon	Quad	68.34
2020-06-20			Festival of Flight	Web Site Sales	Sunshine	60.07
2020-05-11			None	Web Site Sales	Sunset	71.83
2020-06-02			Festival of Flight	Web Site Sales	Doublers	240.1
2020-06-11			Festival of Flight	In Store Sales	Carlota	22.44
2020-09-04			None	Web Site Sales	Aspen	42.15
2020-06-23			Festival of Flight	In Store Sales	Sunbell	72.52
2020-05-03			None	In Store Sales	Quad	68.26
2020-06-23			Festival of Flight	In Store Sales	Quad	32.01
2020-05-02			None	In Store Sales	V-Rang	72.31
2020-09-03			None	Web Site Sales	Quad	470.77
2020-08-07			Fall Kite Event	In Store Sales	Aspen	57.24
2020-07-22			None	Web Site Sales	Quad	66.71
2020-06-08			Festival of Flight	In Store Sales	Bellen	69.79
2020-09-13			None	Web Site Sales	V-Rang	38.29
2020-08-09			Fall Kite Event	In Store Sales	Sunset	47.93
2020-06-22			Festival of Flight	Web Site Sales	Sunset	24.43
2020-08-13			Fall Kite Event	In Store Sales	Carlota	92.76
2020-07-23			None	Web Site Sales	Aspen	63.13
2020-08-30			None	In Store Sales	Carlota	69.24
2020-06-29			None	Web Site Sales	Doublers	80.29
2020-08-30			None	In Store Sales	Bellen	46.12
2020-08-01			None	In Store Sales	Bellen	69.86
2020-06-12			Festival of Flight	In Store Sales	Bellen	23.11
2020-06-08			Festival of Flight	E-mail Coupon	Bellen	46.45
2020-08-05			Fall Kite Event	In Store Sales	Quad	132.67
2020-08-01			None	E-mail Coupon	V-Rang	18.21
2020-08-14			Fall Kite Event	In Store Sales	FlatTop	27.74
2020-06-27			Festival of Flight	Web Site Sales	Aspen	63
2020-06-01			Festival of Flight	In Store Sales	Sunshine	60.92
2020-08-27			Fall Kite Event	In Store Sales	Majectic Beaut	56.24
2020-07-14			None	Web Site Sales	Quad	33.38
2020-06-05			Festival of Flight	Web Site Sales	Sunset	90.6
2020-06-23			Festival of Flight	Web Site Sales	Majectic Beaut	60.79
2020-09-22			None	Web Site Sales	Sunshine	60.2
2020-06-11			Festival of Flight	E-mail Coupon	Carlota	23.66
2020-08-25			Fall Kite Event	In Store Sales	Crested Beaut	24.72
2020-06-22			Festival of Flight	In Store Sales	Crested Beaut	100.47
2020-06-11			Festival of Flight	In Store Sales	Sunset	47.49
2020-08-24			Fall Kite Event	E-mail Coupon	Sunbell	75.48
2020-08-02			Fall Kite Event	In Store Sales	Carlota	46.06
2020-06-30			None	Web Site Sales	Carlota	414.39
2020-06-04			Festival of Flight	In Store Sales	Majectic Beaut	29.66
2020-06-24			Festival of Flight	Web Site Sales	FlatTop	28.53
2020-08-17			Fall Kite Event	In Store Sales	Sunshine	19.03
2020-08-24			Fall Kite Event	In Store Sales	Quad	33.65
2020-06-02			Festival of Flight	Web Site Sales	Quad	136.55
2020-06-12			Festival of Flight	Web Site Sales	Sunshine	38.06
2020-08-18			Fall Kite Event	In Store Sales	Sunbell	72.52
2020-08-28			Fall Kite Event	In Store Sales	Sunbell	48.48
2020-07-17			None	In Store Sales	Crested Beaut	25.29
2020-09-20			None	In Store Sales	Doublers	80.05
2020-06-18			Festival of Flight	Web Site Sales	Quad	66.28
2020-06-27			Festival of Flight	In Store Sales	Sunset	68.69
2020-06-29			None	Web Site Sales	Doublers	560.79
2020-08-17			Fall Kite Event	E-mail Coupon	Carlota	23.09
2020-09-11			None	In Store Sales	Quad	64.71
2020-06-09			Festival of Flight	E-mail Coupon	Carlota	46.35
2020-06-16			Festival of Flight	In Store Sales	Bellen	46.98
2020-06-27			Festival of Flight	In Store Sales	Majectic Beaut	87.02
2020-06-09			Festival of Flight	Web Site Sales	Crested Beaut	75.1
2020-08-05			Fall Kite Event	In Store Sales	Aspen	40.62
2020-06-17			Festival of Flight	Web Site Sales	Quad	99.85
2020-06-22			Festival of Flight	Web Site Sales	Sunset	225.97
2020-08-21			Fall Kite Event	Web Site Sales	Bellen	46.73
2020-06-15			Festival of Flight	In Store Sales	V-Rang	57.16
2020-06-25			Festival of Flight	Web Site Sales	Majectic Beaut	84.71
2020-06-21			Festival of Flight	In Store Sales	Bellen	69.1
2020-08-23			Fall Kite Event	Web Site Sales	FlatTop	80.28
2020-06-24			Festival of Flight	In Store Sales	Carlota	23.35
2020-08-18			Fall Kite Event	E-mail Coupon	Bellen	69.05
2020-08-14			Fall Kite Event	In Store Sales	Majectic Beaut	90.02
2020-08-12			Fall Kite Event	Web Site Sales	Carlota	46.1
2020-08-04			Fall Kite Event	In Store Sales	Sunshine	40.34
2020-09-17			None	Web Site Sales	Bellen	69.17
2020-06-27			Festival of Flight	In Store Sales	V-Rang	18.64
2020-08-29			Fall Kite Event	Web Site Sales	Bellen	46.96
2020-08-14			Fall Kite Event	In Store Sales	Sunshine	40.7
2020-06-14			Festival of Flight	Web Site Sales	Sunshine	40.7
2020-07-14			None	Web Site Sales	Quad	102.43
2020-09-08			None	In Store Sales	V-Rang	54.38
2020-08-06			Fall Kite Event	In Store Sales	Quad	34.82
2020-06-16			Festival of Flight	Web Site Sales	Sunset	47.03
2020-08-04			Fall Kite Event	In Store Sales	Sunshine	38.76
2020-07-04			None	In Store Sales	Quad	68.01
2020-08-27			Fall Kite Event	In Store Sales	Crested Beaut	50.33
2020-08-23			Fall Kite Event	E-mail Coupon	Quad	132.98
2020-06-29			None	Web Site Sales	Bellen	46.1
2020-06-10			Festival of Flight	Web Site Sales	Quad	66.93
2020-06-06			Festival of Flight	In Store Sales	V-Rang	54.87
2020-06-06			Festival of Flight	In Store Sales	Sunbell	25.43
2020-06-28			None	Web Site Sales	Sunbell	69.27
2020-06-23			Festival of Flight	In Store Sales	Bellen	23.82
2020-08-23			Fall Kite Event	In Store Sales	Quad	102.75
2020-08-23			Fall Kite Event	Web Site Sales	Quad	34.23
2020-06-04			Festival of Flight	Web Site Sales	Sunbell	75.91
2020-06-26			Festival of Flight	E-mail Coupon	Sunbell	46.15
2020-06-27			Festival of Flight	Web Site Sales	Quad	96.52
2020-06-28			None	Web Site Sales	Sunshine	38.51
2020-07-06			None	Web Site Sales	Sunshine	60.2
2020-08-30			None	In Store Sales	Bellen	23.8
2020-07-23			None	Web Site Sales	Majectic Beaut	87.02
2020-08-08			Fall Kite Event	Web Site Sales	Carlota	69.62
2020-05-05			None	In Store Sales	Majectic Beaut	116.21
2020-06-12			Festival of Flight	E-mail Coupon	Quad	68.21
2020-06-03			Festival of Flight	Web Site Sales	Bellen	46.23
2020-06-07			Festival of Flight	In Store Sales	FlatTop	53.94
2020-06-21			Festival of Flight	Web Site Sales	Sunshine	60.66
2020-06-02			Festival of Flight	Web Site Sales	Bellen	69.9
2020-06-19			Festival of Flight	Web Site Sales	Sunbell	50.75
2020-06-04			Festival of Flight	In Store Sales	Quad	99.3
2020-08-11			Fall Kite Event	In Store Sales	Carlota	69.71
2020-06-24			Festival of Flight	Web Site Sales	Sunbell	72.2
2020-06-09			Festival of Flight	Web Site Sales	Quad	102.32
2020-06-09			Festival of Flight	In Store Sales	Crested Beaut	46.4
2020-06-27			Festival of Flight	In Store Sales	Sunbell	46.25
2020-08-07			Fall Kite Event	E-mail Coupon	Quad	533.23
2020-06-05			Festival of Flight	Web Site Sales	Quad	102.77
2020-06-28			None	E-mail Coupon	Carlota	44.96
2020-06-07			Festival of Flight	Web Site Sales	Aspen	42.5
2020-08-05			Fall Kite Event	Web Site Sales	Carlota	22.7
2020-08-15			Fall Kite Event	In Store Sales	Bellen	501.12
2020-06-04			Festival of Flight	In Store Sales	Bellen	458.34
2020-08-04			Fall Kite Event	In Store Sales	Sunbell	25.66
2020-09-08			None	Web Site Sales	Sunbell	24.7
2020-08-02			Fall Kite Event	In Store Sales	Carlota	23.27
2020-06-01			Festival of Flight	In Store Sales	Quad	64.07
2020-06-21			Festival of Flight	In Store Sales	Quad	66.5
2020-06-22			Festival of Flight	In Store Sales	Quad	66.82
2020-09-26			None	In Store Sales	Crested Beaut	75.4
2020-08-25			Fall Kite Event	E-mail Coupon	Carlota	23.43
2020-08-20			Fall Kite Event	In Store Sales	Sunset	71.92
2020-07-31			None	In Store Sales	Sunset	45.1
2020-08-08			Fall Kite Event	E-mail Coupon	Carlota	88.83
2020-09-09			None	Web Site Sales	Quad	132.11
2020-08-15			Fall Kite Event	In Store Sales	Bellen	23.08
2020-09-16			None	In Store Sales	Sunbell	23.16
2020-08-18			Fall Kite Event	In Store Sales	V-Rang	77
2020-08-17			Fall Kite Event	In Store Sales	Carlota	69.24
2020-08-27			Fall Kite Event	In Store Sales	Crested Beaut	24.88
2020-06-19			Festival of Flight	Web Site Sales	Bellen	92.03
2020-08-19			Fall Kite Event	E-mail Coupon	Quad	66.58
2020-06-24			Festival of Flight	Web Site Sales	Carlota	92.05
2020-08-04			Fall Kite Event	In Store Sales	Majectic Beaut	87.39
2020-08-08			Fall Kite Event	Web Site Sales	Quad	66.68
2020-08-20			Fall Kite Event	E-mail Coupon	Carlota	46.56
2020-06-19			Festival of Flight	In Store Sales	V-Rang	54.93
2020-08-05			Fall Kite Event	In Store Sales	Carlota	69.95
2020-08-02			Fall Kite Event	Web Site Sales	Crested Beaut	72.17
2020-06-02			Festival of Flight	E-mail Coupon	Crested Beaut	46.11
2020-08-27			Fall Kite Event	Web Site Sales	Quad	102.25
2020-06-04			Festival of Flight	Web Site Sales	Sunshine	60.12
2020-06-25			Festival of Flight	E-mail Coupon	Quad	66.65
2020-08-29			Fall Kite Event	In Store Sales	Quad	96.89
2020-08-17			Fall Kite Event	In Store Sales	Majectic Beaut	58.86
2020-09-11			None	Web Site Sales	Quad	64.95
2020-07-01			None	In Store Sales	Aspen	21.99
2020-06-01			Festival of Flight	Web Site Sales	Carlota	69.42
2020-08-15			Fall Kite Event	Web Site Sales	Sunset	45.47
2020-06-08			Festival of Flight	Web Site Sales	Aspen	60.53
2020-06-29			None	E-mail Coupon	Sunset	47.91
2020-08-21			Fall Kite Event	In Store Sales	Aspen	42.12
2020-06-14			Festival of Flight	In Store Sales	Bellen	66.71
2020-06-16			Festival of Flight	In Store Sales	Bellen	23.54
2020-08-25			Fall Kite Event	Web Site Sales	Sunbell	48.62
2020-09-19			None	Web Site Sales	Sunset	335.54
2020-09-07			None	In Store Sales	Sunshine	60.98
2020-08-01			None	In Store Sales	Crested Beaut	50.06
2020-06-24			Festival of Flight	Web Site Sales	Carlota	69.79
2020-06-30			None	Web Site Sales	Crested Beaut	72.46
2020-07-15			None	Web Site Sales	Sunshine	20.22
2020-06-22			Festival of Flight	Web Site Sales	Sunshine	200.6
2020-08-15			Fall Kite Event	Web Site Sales	Crested Beaut	75.21
2020-05-20			None	Web Site Sales	Carlota	523.05
2020-06-21			Festival of Flight	E-mail Coupon	Sunshine	40.67
2020-08-07			Fall Kite Event	In Store Sales	Bellen	22.7
2020-06-01			Festival of Flight	In Store Sales	Sunbell	96.37
2020-06-29			None	In Store Sales	Carlota	44.37
2020-08-12			Fall Kite Event	Web Site Sales	FlatTop	83.67
2020-08-25			Fall Kite Event	In Store Sales	Bellen	46.13
2020-08-24			Fall Kite Event	Web Site Sales	Sunbell	48.38
2020-08-12			Fall Kite Event	In Store Sales	Sunset	24.64
2020-08-19			Fall Kite Event	Web Site Sales	Sunshine	20.63
2020-07-03			None	In Store Sales	FlatTop	53.15
2020-08-24			Fall Kite Event	E-mail Coupon	Crested Beaut	24.92
2020-08-27			Fall Kite Event	In Store Sales	Sunshine	60.52
2020-08-04			Fall Kite Event	Web Site Sales	Carlota	23.69
2020-08-01			None	In Store Sales	Crested Beaut	46.73
2020-08-25			Fall Kite Event	Web Site Sales	Crested Beaut	24.17
2020-08-16			Fall Kite Event	In Store Sales	Sunshine	40.9
2020-09-02			None	In Store Sales	V-Rang	36.74
2020-08-07			Fall Kite Event	In Store Sales	Bellen	46.13
2020-06-29			None	E-mail Coupon	Crested Beaut	48.61
2020-06-24			Festival of Flight	In Store Sales	Sunshine	20.59
2020-08-01			None	Web Site Sales	Bellen	66.54
2020-08-02			Fall Kite Event	In Store Sales	Sunset	68.37
2020-06-05			Festival of Flight	In Store Sales	V-Rang	54.7
2020-08-30			None	In Store Sales	Quad	66.97
2020-06-15			Festival of Flight	Web Site Sales	Aspen	63.42
2020-05-18			None	Web Site Sales	Sunshine	20.91
2020-08-07			Fall Kite Event	E-mail Coupon	Sunset	24.21
2020-08-04			Fall Kite Event	In Store Sales	Aspen	84.38
2020-07-08			None	In Store Sales	Sunset	47.94
2020-05-25			None	Web Site Sales	Majectic Beaut	87.2
2020-05-13			None	In Store Sales	Sunshine	40.75
2020-09-09			None	Web Site Sales	Sunshine	246.2
2020-06-15			Festival of Flight	Web Site Sales	Doublers	240.26
2020-08-25			Fall Kite Event	In Store Sales	Quad	99.9
2020-06-01			Festival of Flight	In Store Sales	Quad	68.92
2020-06-27			Festival of Flight	Web Site Sales	Crested Beaut	73
2020-08-29			Fall Kite Event	Web Site Sales	Sunshine	40.34
2020-06-23			Festival of Flight	In Store Sales	Sunset	71.72
2020-06-10			Festival of Flight	Web Site Sales	Sunset	71.67
2020-05-25			None	In Store Sales	Carlota	46.43
2020-07-26			None	Web Site Sales	Bellen	69.84
2020-06-25			Festival of Flight	Web Site Sales	Carlota	69.4
2020-08-03			Fall Kite Event	Web Site Sales	Quad	66.34
2020-06-04			Festival of Flight	E-mail Coupon	Quad	68.95
2020-06-28			None	In Store Sales	Sunshine	38.36
2020-08-10			Fall Kite Event	In Store Sales	Bellen	23.91
2020-07-08			None	Web Site Sales	Majectic Beaut	58.61
2020-06-08			Festival of Flight	Web Site Sales	Majectic Beaut	87.15
2020-05-01			None	Web Site Sales	FlatTop	83.4
2020-08-29			Fall Kite Event	In Store Sales	Majectic Beaut	331.02
2020-08-28			Fall Kite Event	E-mail Coupon	Quad	96.6
2020-06-08			Festival of Flight	E-mail Coupon	Majectic Beaut	58.37
2020-06-20			Festival of Flight	Web Site Sales	Bellen	23.78
2020-06-28			None	Web Site Sales	FlatTop	277.32
2020-06-18			Festival of Flight	Web Site Sales	Quad	33.33
2020-06-14			Festival of Flight	Web Site Sales	Sunbell	24.9
2020-08-22			Fall Kite Event	Web Site Sales	Bellen	66.78
2020-06-13			Festival of Flight	Web Site Sales	FlatTop	27.75
2020-06-04			Festival of Flight	Web Site Sales	Bellen	23.48
2020-06-13			Festival of Flight	Web Site Sales	Majectic Beaut	28.71
2020-08-30			None	Web Site Sales	Sunshine	60.09
2020-09-18			None	In Store Sales	Crested Beaut	75.36
2020-08-18			Fall Kite Event	E-mail Coupon	Doublers	78.58
2020-08-29			Fall Kite Event	In Store Sales	FlatTop	83.37
2020-06-02			Festival of Flight	Web Site Sales	Quad	136.15
2020-07-24			None	Web Site Sales	Majectic Beaut	29.8
2020-08-18			Fall Kite Event	Web Site Sales	Sunshine	38.01
2020-06-29			None	Web Site Sales	Bellen	46.46
[truncated: 1 more rows]
