# Supplementary material
Source: ML conference proceedings conference paper supplement (https://openreview.net/forum?id=tfyr2zRVoK)
Supplement: supplementary_material [file 13_Invoices_gt1.xlsx]

## Sheet: Sheet2
Row Labels	Sum of Units
2011-05-25	73
2011-05-27	30
2011-05-28	160
Grand Total	263

## Sheet: Sheet1
Invoice No.	Date	Sales Rep	Product	Price	Units	Sales
10500	2011-05-25	Joe	Majestic	30	25	750
10501	2011-05-25	Moe	Majestic	30	9	270
10501	2011-05-25	Moe	Quad	32	21	672
10501	2011-05-25	Moe	Alpine	22	7	154
10501	2011-05-25	Moe	Carlota	25	11	275
10502	2011-05-27	Moe	Majestic	30	5	150
10502	2011-05-27	Moe	Carlota	25	25	625
10503	2011-05-28	Chin	Carlota	25	21	525
10503	2011-05-28	Chin	Alpine	22	16	352
10503	2011-05-28	Chin	Quad	32	4	128
10503	2011-05-28	Chin	Majestic	30	18	540
10504	2011-05-28	Moe	Bellen	23	17	391
10504	2011-05-28	Moe	Quad	32	8	256
10505	2011-05-28	Joe	Bellen	23	21	483
10505	2011-05-28	Joe	Carlota	25	8	200
10505	2011-05-28	Joe	Quad	32	17	544
10505	2011-05-28	Joe	Majestic	30	12	360
10505	2011-05-28	Joe	Alpine	22	18	396
