# Supplementary material
Source: ML conference proceedings conference paper supplement (https://openreview.net/forum?id=tfyr2zRVoK)
Supplement: supplementary_material [file 14_EntireShippingCosts_gt1.xlsx]

## Sheet: Sheet2
Customers
Chandler
Glendale
Mesa
Scottsdale
Little Rock
Antioch
Berkeley
Chula Vista
Concord
Daly City
Fairfield
Hayward
Huntington Beach
Long Beach
Modesto
Santa Clara
Sunnyvale
Thousand Oaks
Vallejo
Aurora
Colorado Springs
Denver
Chicago
Joliet
Evansville
Fort Wayne
Cedar Rapids
Kansas City
Topeka
Lexington-Fayette
Louisville-Jefferson County5
New Orleans
Baltimore
Ann Arbor
Detroit
St. Paul
Kansas City
St. Louis
Omaha
Henderson
Reno
Manchester
Elizabeth
Jersey City
Newark
New York
Yonkers
Cary
Durham
Cincinnati
Cleveland
Norman
Tulsa
Eugene
Portland
Philadelphia
Pittsburgh
Providence
Columbia
Sioux Falls
Clarksville
Killeen
Laredo
Mesquite
Alexandria
Hampton
Seattle
Spokane
Green Bay
Madison

## Sheet: Sheet1
Customers	Seattle	Milwaukee	Birmingham	Oakland
Chandler	1447	1830	1686	766
Glendale	1405	1870	1715	744
Mesa	1440	1816	1702	758
Scottsdale	1435	1818	1706	754
Little Rock	2277	743	373	1955
Antioch	796	2146	2299	36
Berkeley	795	2165	2319	4
Chula Vista	1258	2124	1996	499
Concord	785	2155	2319	25
Daly City	813	2183	2329	21
Fairfield	759	2129	2339	41
Hayward	816	2186	2306	20
Huntington Beach	1162	2063	2034	404
Long Beach	1156	2071	2042	398
Modesto	822	2158	2248	82
Santa Clara	834	2204	2290	44
Sunnyvale	835	2205	2293	44
Thousand Oaks	1143	2092	2062	385
Vallejo	773	2143	2328	25
Aurora	1332	1045	1318	1260
Colorado Springs	1388	1114	1312	1316
Denver	1318	1043	1328	1246
Chicago	2067	93	663	2124
Joliet	2052	126	671	2099
Evansville	2254	387	343	2214
Fort Wayne	2233	262	597	2269
Cedar Rapids	1832	244	782	1919
Kansas City	1842	576	695	1802
Topeka	1848	630	748	1776
Lexington-Fayette	2406	468	411	2383
Louisville-Jefferson County5	2340	401	363	2317
New Orleans	2617	1016	344	2265
Baltimore	2771	800	781	2808
Ann Arbor	2314	343	710	2351
Detroit	2352	381	722	2389
St. Paul	1668	332	1069	1970
Kansas City	1840	569	688	1800
St. Louis	2089	375	500	2050
Omaha	1659	508	869	1661
Henderson	1145	1806	1799	568
Reno	738	1964	2267	256
Manchester	3087	1116	1214	3124
Elizabeth	2857	886	950	2894
Jersey City	2860	889	959	2896
Newark	2852	881	952	2889
New York	2863	892	964	2900
Yonkers	2873	902	980	2910
Cary	2876	905	543	2829
Durham	2856	885	531	2808
Cincinnati	2327	389	468	2374
Cleveland	2417	446	712	2453
Norman	2007	892	705	1639
Tulsa	2000	773	639	1718
Eugene	278	2173	2494	523
Portland	168	2065	2480	629
Philadelphia	2832	861	878	2869
Pittsburgh	2535	564	753	2572
Providence	3046	1075	1153	3083
Columbia	2835	903	362	2678
Sioux Falls	1478	497	1053	1727
Clarksville	2359	561	232	2294
Killeen	2091	1156	741	1744
Laredo	2219	1432	978	1780
Mesquite	2123	1052	629	1734
Alexandria	2781	811	746	2818
Hampton	2945	974	716	2950
Seattle	0	1995	2525	796
Spokane	282	1714	2244	864
Green Bay	1934	121	878	2224
Madison	1927	74	811	2091
