# Supplementary material
Source: ML conference proceedings conference paper supplement (https://openreview.net/forum?id=tfyr2zRVoK)
Supplement: supplementary_material [file 15_EntireShippingCosts_gt1.xlsx]

## Sheet: Sheet1
Customers	Seattle	Milwaukee	Birmingham	Oakland	Combined Info
Chandler	1447	1830	1686	766	Customers: Chandler, Seattle: 1447, Milwaukee: 1830, Birmingham: 1686, Oakland: 766
Glendale	1405	1870	1715	744	Customers: Glendale, Seattle: 1405, Milwaukee: 1870, Birmingham: 1715, Oakland: 744
Mesa	1440	1816	1702	758	Customers: Mesa, Seattle: 1440, Milwaukee: 1816, Birmingham: 1702, Oakland: 758
Scottsdale	1435	1818	1706	754	Customers: Scottsdale, Seattle: 1435, Milwaukee: 1818, Birmingham: 1706, Oakland: 754
Little Rock	2277	743	373	1955	Customers: Little Rock, Seattle: 2277, Milwaukee: 743, Birmingham: 373, Oakland: 1955
Antioch	796	2146	2299	36	Customers: Antioch, Seattle: 796, Milwaukee: 2146, Birmingham: 2299, Oakland: 36
Berkeley	795	2165	2319	4	Customers: Berkeley, Seattle: 795, Milwaukee: 2165, Birmingham: 2319, Oakland: 4
Chula Vista	1258	2124	1996	499	Customers: Chula Vista, Seattle: 1258, Milwaukee: 2124, Birmingham: 1996, Oakland: 499
Concord	785	2155	2319	25	Customers: Concord, Seattle: 785, Milwaukee: 2155, Birmingham: 2319, Oakland: 25
Daly City	813	2183	2329	21	Customers: Daly City, Seattle: 813, Milwaukee: 2183, Birmingham: 2329, Oakland: 21
Fairfield	759	2129	2339	41	Customers: Fairfield, Seattle: 759, Milwaukee: 2129, Birmingham: 2339, Oakland: 41
Hayward	816	2186	2306	20	Customers: Hayward, Seattle: 816, Milwaukee: 2186, Birmingham: 2306, Oakland: 20
Huntington Beach	1162	2063	2034	404	Customers: Huntington Beach, Seattle: 1162, Milwaukee: 2063, Birmingham: 2034, Oakland: 404
Long Beach	1156	2071	2042	398	Customers: Long Beach, Seattle: 1156, Milwaukee: 2071, Birmingham: 2042, Oakland: 398
Modesto	822	2158	2248	82	Customers: Modesto, Seattle: 822, Milwaukee: 2158, Birmingham: 2248, Oakland: 82
Santa Clara	834	2204	2290	44	Customers: Santa Clara, Seattle: 834, Milwaukee: 2204, Birmingham: 2290, Oakland: 44
Sunnyvale	835	2205	2293	44	Customers: Sunnyvale, Seattle: 835, Milwaukee: 2205, Birmingham: 2293, Oakland: 44
Thousand Oaks	1143	2092	2062	385	Customers: Thousand Oaks, Seattle: 1143, Milwaukee: 2092, Birmingham: 2062, Oakland: 385
Vallejo	773	2143	2328	25	Customers: Vallejo, Seattle: 773, Milwaukee: 2143, Birmingham: 2328, Oakland: 25
Aurora	1332	1045	1318	1260	Customers: Aurora, Seattle: 1332, Milwaukee: 1045, Birmingham: 1318, Oakland: 1260
Colorado Springs	1388	1114	1312	1316	Customers: Colorado Springs, Seattle: 1388, Milwaukee: 1114, Birmingham: 1312, Oakland: 1316
Denver	1318	1043	1328	1246	Customers: Denver, Seattle: 1318, Milwaukee: 1043, Birmingham: 1328, Oakland: 1246
Chicago	2067	93	663	2124	Customers: Chicago, Seattle: 2067, Milwaukee: 93, Birmingham: 663, Oakland: 2124
Joliet	2052	126	671	2099	Customers: Joliet, Seattle: 2052, Milwaukee: 126, Birmingham: 671, Oakland: 2099
Evansville	2254	387	343	2214	Customers: Evansville, Seattle: 2254, Milwaukee: 387, Birmingham: 343, Oakland: 2214
Fort Wayne	2233	262	597	2269	Customers: Fort Wayne, Seattle: 2233, Milwaukee: 262, Birmingham: 597, Oakland: 2269
Cedar Rapids	1832	244	782	1919	Customers: Cedar Rapids, Seattle: 1832, Milwaukee: 244, Birmingham: 782, Oakland: 1919
Kansas City	1842	576	695	1802	Customers: Kansas City, Seattle: 1842, Milwaukee: 576, Birmingham: 695, Oakland: 1802
Topeka	1848	630	748	1776	Customers: Topeka, Seattle: 1848, Milwaukee: 630, Birmingham: 748, Oakland: 1776
Lexington-Fayette	2406	468	411	2383	Customers: Lexington-Fayette, Seattle: 2406, Milwaukee: 468, Birmingham: 411, Oakland: 2383
Louisville-Jefferson County5	2340	401	363	2317	Customers: Louisville-Jefferson County5, Seattle: 2340, Milwaukee: 401, Birmingham: 363, Oakland: 2317
New Orleans	2617	1016	344	2265	Customers: New Orleans, Seattle: 2617, Milwaukee: 1016, Birmingham: 344, Oakland: 2265
Baltimore	2771	800	781	2808	Customers: Baltimore, Seattle: 2771, Milwaukee: 800, Birmingham: 781, Oakland: 2808
Ann Arbor	2314	343	710	2351	Customers: Ann Arbor, Seattle: 2314, Milwaukee: 343, Birmingham: 710, Oakland: 2351
Detroit	2352	381	722	2389	Customers: Detroit, Seattle: 2352, Milwaukee: 381, Birmingham: 722, Oakland: 2389
St. Paul	1668	332	1069	1970	Customers: St. Paul, Seattle: 1668, Milwaukee: 332, Birmingham: 1069, Oakland: 1970
Kansas City	1840	569	688	1800	Customers: Kansas City, Seattle: 1840, Milwaukee: 569, Birmingham: 688, Oakland: 1800
St. Louis	2089	375	500	2050	Customers: St. Louis, Seattle: 2089, Milwaukee: 375, Birmingham: 500, Oakland: 2050
Omaha	1659	508	869	1661	Customers: Omaha, Seattle: 1659, Milwaukee: 508, Birmingham: 869, Oakland: 1661
Henderson	1145	1806	1799	568	Customers: Henderson, Seattle: 1145, Milwaukee: 1806, Birmingham: 1799, Oakland: 568
Reno	738	1964	2267	256	Customers: Reno, Seattle: 738, Milwaukee: 1964, Birmingham: 2267, Oakland: 256
Manchester	3087	1116	1214	3124	Customers: Manchester, Seattle: 3087, Milwaukee: 1116, Birmingham: 1214, Oakland: 3124
Elizabeth	2857	886	950	2894	Customers: Elizabeth, Seattle: 2857, Milwaukee: 886, Birmingham: 950, Oakland: 2894
Jersey City	2860	889	959	2896	Customers: Jersey City, Seattle: 2860, Milwaukee: 889, Birmingham: 959, Oakland: 2896
Newark	2852	881	952	2889	Customers: Newark, Seattle: 2852, Milwaukee: 881, Birmingham: 952, Oakland: 2889
New York	2863	892	964	2900	Customers: New York, Seattle: 2863, Milwaukee: 892, Birmingham: 964, Oakland: 2900
Yonkers	2873	902	980	2910	Customers: Yonkers, Seattle: 2873, Milwaukee: 902, Birmingham: 980, Oakland: 2910
Cary	2876	905	543	2829	Customers: Cary, Seattle: 2876, Milwaukee: 905, Birmingham: 543, Oakland: 2829
Durham	2856	885	531	2808	Customers: Durham, Seattle: 2856, Milwaukee: 885, Birmingham: 531, Oakland: 2808
Cincinnati	2327	389	468	2374	Customers: Cincinnati, Seattle: 2327, Milwaukee: 389, Birmingham: 468, Oakland: 2374
Cleveland	2417	446	712	2453	Customers: Cleveland, Seattle: 2417, Milwaukee: 446, Birmingham: 712, Oakland: 2453
Norman	2007	892	705	1639	Customers: Norman, Seattle: 2007, Milwaukee: 892, Birmingham: 705, Oakland: 1639
Tulsa	2000	773	639	1718	Customers: Tulsa, Seattle: 2000, Milwaukee: 773, Birmingham: 639, Oakland: 1718
Eugene	278	2173	2494	523	Customers: Eugene, Seattle: 278, Milwaukee: 2173, Birmingham: 2494, Oakland: 523
Portland	168	2065	2480	629	Customers: Portland, Seattle: 168, Milwaukee: 2065, Birmingham: 2480, Oakland: 629
Philadelphia	2832	861	878	2869	Customers: Philadelphia, Seattle: 2832, Milwaukee: 861, Birmingham: 878, Oakland: 2869
Pittsburgh	2535	564	753	2572	Customers: Pittsburgh, Seattle: 2535, Milwaukee: 564, Birmingham: 753, Oakland: 2572
Providence	3046	1075	1153	3083	Customers: Providence, Seattle: 3046, Milwaukee: 1075, Birmingham: 1153, Oakland: 3083
Columbia	2835	903	362	2678	Customers: Columbia, Seattle: 2835, Milwaukee: 903, Birmingham: 362, Oakland: 2678
Sioux Falls	1478	497	1053	1727	Customers: Sioux Falls, Seattle: 1478, Milwaukee: 497, Birmingham: 1053, Oakland: 1727
Clarksville	2359	561	232	2294	Customers: Clarksville, Seattle: 2359, Milwaukee: 561, Birmingham: 232, Oakland: 2294
Killeen	2091	1156	741	1744	Customers: Killeen, Seattle: 2091, Milwaukee: 1156, Birmingham: 741, Oakland: 1744
Laredo	2219	1432	978	1780	Customers: Laredo, Seattle: 2219, Milwaukee: 1432, Birmingham: 978, Oakland: 1780
Mesquite	2123	1052	629	1734	Customers: Mesquite, Seattle: 2123, Milwaukee: 1052, Birmingham: 629, Oakland: 1734
Alexandria	2781	811	746	2818	Customers: Alexandria, Seattle: 2781, Milwaukee: 811, Birmingham: 746, Oakland: 2818
Hampton	2945	974	716	2950	Customers: Hampton, Seattle: 2945, Milwaukee: 974, Birmingham: 716, Oakland: 2950
Seattle	0	1995	2525	796	Customers: Seattle, Seattle: 0, Milwaukee: 1995, Birmingham: 2525, Oakland: 796
Spokane	282	1714	2244	864	Customers: Spokane, Seattle: 282, Milwaukee: 1714, Birmingham: 2244, Oakland: 864
Green Bay	1934	121	878	2224	Customers: Green Bay, Seattle: 1934, Milwaukee: 121, Birmingham: 878, Oakland: 2224
Madison	1927	74	811	2091	Customers: Madison, Seattle: 1927, Milwaukee: 74, Birmingham: 811, Oakland: 2091
