# Supplementary material
Source: ML conference proceedings conference paper supplement (https://openreview.net/forum?id=tfyr2zRVoK)
Supplement: supplementary_material [file 15_Invoices_gt1.xlsx]

## Sheet: Sheet1
Invoice No.	Date	Sales Rep	Product	Price	Units	Sales	Unique Sales Rep ID
10500	2011-05-25	Joe	Majestic	30	25	750	JoeM
10501	2011-05-25	Moe	Majestic	30	9	270	MoeM
10501	2011-05-25	Moe	Quad	32	21	672	MoeQ
10501	2011-05-25	Moe	Alpine	22	7	154	MoeA
10501	2011-05-25	Moe	Carlota	25	11	275	MoeC
10502	2011-05-27	Moe	Majestic	30	5	150	MoeM
10502	2011-05-27	Moe	Carlota	25	25	625	MoeC
10503	2011-05-28	Chin	Carlota	25	21	525	ChinC
10503	2011-05-28	Chin	Alpine	22	16	352	ChinA
10503	2011-05-28	Chin	Quad	32	4	128	ChinQ
10503	2011-05-28	Chin	Majestic	30	18	540	ChinM
10504	2011-05-28	Moe	Bellen	23	17	391	MoeB
10504	2011-05-28	Moe	Quad	32	8	256	MoeQ
10505	2011-05-28	Joe	Bellen	23	21	483	JoeB
10505	2011-05-28	Joe	Carlota	25	8	200	JoeC
10505	2011-05-28	Joe	Quad	32	17	544	JoeQ
10505	2011-05-28	Joe	Majestic	30	12	360	JoeM
10505	2011-05-28	Joe	Alpine	22	18	396	JoeA
