# Supplementary material
Source: ML conference proceedings conference paper supplement (https://openreview.net/forum?id=tfyr2zRVoK)
Supplement: supplementary_material [file AuthorWrittenTasks.xlsx]

## Sheet: Sheet1
Sheet Name	No.	Context	Instructions	Source	Categories	Atomic actions
Invoices	1	My workbook records many invoices made on different dates.	Highlight Sales above average as green fill with dark green text.	EMT787.xlsx	Formatting	Conditional formatting
Invoices	2	My workbook records many invoices made on different dates.	Can you help me set the fill color of the cells whose sales rank top 5 as red?	EMT787.xlsx	Formatting	Conditional formatting
Invoices	3	My workbook records many invoices made on different dates.	I want to highlight cells whose sales > 600$ as red fill with dark red text.	EMT787.xlsx	Formatting	Conditional formatting
Invoices	4	My workbook records many invoices made on different dates.	Sort by Sales and then apply different colors to cells in the Sales column. Bottom 25% gets red fill and top 25% gets blue fill.	EMT787.xlsx	Management, Formatting	Sort, Conditional formatting
Invoices	5	My workbook records many invoices made on different dates.	Set cells in the Sales column that are on 5/25/2011 as red fill with white text.	EMT787.xlsx	Formatting	Conditional formatting
Invoices	6	My workbook records many invoices made on different dates.	Highlight sales above average as red fill.	EMT787.xlsx	Formatting	Conditional formatting
SalesRep	1	My workbook records the monthly sales of all employees.	Please help me calculate the total sales for each employee in a new column and the total for each month in a new row. Then use conditional formatting to format the numbers for each month so that the employee with the largest sales is highlighted in blue while the lowest in red.		Entry and manipulation, Formula, Formatting	Update cell value, Math functions, Conditional formatting
SummerSales	1	My workbook records the sales of my company in the summer.	Create a pivot table at A1 in a new sheet to calculate the sum of revenue for each product. In this new sheet, plot a horizontal bar chart illustrating the revenue sums in the pivot table. Turn off the legend and then set the chart tile as "Revenue of each product".	E-DAB-05-Visualizations-Finished - T V (1)	Entry and manipulation, Pivot Table, Charts	Create sheet, Create Pivot Table, Create chart, Set chart legend, Set chart title
EntireSummerSales	1	My workbook records the sales of my company in the summer.	In a new sheet, merge cells A1:B1 and write bold text "Summer sales ($)" with blue fill color and white text color. Then create a pivot table starting at A2 in this new sheet for my data in Sheet 1 to calculate the sum of revenue for each product. Plot a horizontal bar chart illustrating the results. Set the chart title as "Revenue of Each Product" and turn off the axis titles and legend.	E-DAB-05-Visualizations-Finished - T V (1)	Entry and manipulation, Formatting, Pivot Table, Charts	Create sheet, Merge cells, Update cell value, Format cells, Create Pivot Table, Create chart, Set chart title, Set chart axis, Set chart legend
EntireSummerSales	2	My workbook records the sales of my company in the summer.	In a new sheet, merge cells A1:B1 and write bold text "Summer sales ($)" with yellow fill color and white text color. Then create a pivot table starting at A2 in this new sheet for my data in Sheet 1 to calculate the sum of revenue for each week. Plot a line chart illustrating the trend of the results with chart title "Revenue of Each Week". Set the horizontal axis label as "Week" and turn off th…	E-DAB-05-Visualizations-Finished - T V (1)	Entry and manipulation, Formatting, Pivot Table, Charts	Create sheet, Merge cells, Update cell value, Format cells, Create Pivot Table, Create chart, Set chart title, Set chart axis, Set chart legend
EntireSummerSales	3	My workbook records the sales of my company in the summer.	In a new sheet, merge cells A1:B1 and write bold text "Summer sales ($)" with blue fill color and white text color. Then create a pivot table at A2 in this new sheet for my data in Sheet 1 and summarize the monthly revenue for each sales channel (Set the Month as row field). Plot a stacked column chart illustrating the results. Set the chart titles as "Revenue of Each Channel ($)" and move the le…	E-DAB-05-Visualizations-Finished - T V (1)	Entry and manipulation, Formatting, Pivot Table, Charts	Create sheet, Merge cells, Update cell value, Format cells, Create Pivot Table, Create chart, Set chart title, Set chart legend
EntireSummerSales	4	My workbook records the sales of my company in the summer.	In a new sheet, merge cells A1:B1 and write bold text "Summer sales ($)" with blue fill color and white text color. Then create a pivot table starting at A2 in this new sheet for my data in Sheet 1 to calculate the sum of revenue for each promotion. Plot a 3D pie chart illustrating the results. Set the chart title as "Revenue of Each Promotion ($)" and move the legends to the bottom. Don't forget…	E-DAB-05-Visualizations-Finished - T V (1)	Entry and manipulation, Formatting, Pivot Table, Charts	Create sheet, Merge cells, Update cell value, Format cells, Create Pivot Table, Create chart, Set chart title, Set chart legend, Add data labels
ShippingCosts	1	My company needs to deliver the goods to customers by truck. My workbook records the distances between my customers and four destinations. The per-mile shipping charge is $3.11 with a minimum charge of $75.	For each customer, please help me determine which destination has the shortest distance. Put the distances in a new column with header "Min Distance" and the nearest destination in another new column with header "Shipping Center". Finally, calculate the total shipping charge for each customer transaction accordingly in a new column with header "Total Shipping Charge".	BI348Chapter07Finished-shipping costs	Entry and manipulation, Formula	Update cell value, Autofill, Math functions, Lookup and reference functions, Logical functions
EntireShippingCosts	1	My company needs to deliver the goods to customers by truck. My workbook records the distances between my customers and four destinations. The per-mile shipping charge is $3.5 with a minimum charge of $80.	For each customer, please help me determine which destination has the shortest distance. Put the distances in a new column with header "Min Distance" and the nearest destination in another new column with header "Shipping Center". Finally, calculate the total shipping charge for each customer transaction accordingly in a new column with header "Total Shipping Charge".	BI348Chapter07Finished-shipping costs	Entry and manipulation, Formula	Update cell value, Autofill, Math functions, Lookup and reference functions, Logical functions
PricingTable	1	My workbook contains two tables: Sheet "Sheet1" records my transactional data which are the number of rolls of fence sold on certain dates. Sheet "Pricing Table" is a pricing table used to determine the price per roll according to the range the roll number falls in (The range is bounded by Units From and Unit To).	Determine the price of each transaction using the pricing table and fill in the Price column. Then use these prices to calculate the revenue of each transaction in the Revenue column.	BI348Chapter07Finished-calculate revenue	Entry and manipulation, Formula	Update cell value, Autofill, Math functions, Lookup and reference functions
BoomerangSales	1	My workbook has two tables. Sheet "Sheet1" records the sales of a boomerang company. Sheet "Retail Price" lists the retail prices for all products.	I want to calculate the revenue for each transaction in the sales table considering corresponding retail price and discount. Please help me do this in a new column with header "Revenue" of Sheet1. Then create a pivot table at A1 in a new sheet to show the counts of the websites on which boomerangs were sold. Finally, plot a bar chart in this new sheet for the pivot table with chart title "Sales f…		Entry and manipulation, Formula, Pivot Table, Charts	Update cell value, Autofill, Math functions, Lookup and reference functions, Create sheet, Create Pivot Table, Create chart, Set chart title, Set chart legend
BoomerangSales	2	My workbook has two tables. Sheet "Sheet1" records the sales of a boomerang company. Sheet "Retail Price" lists the retail prices for all products.	Help me calculate the revenue for each product in the sales table considering corresponding retail price and discount. Do this in a new column with header "Revenue" of Sheet1. Then create a pivot table at A1 in a new sheet to show the sum of revenue for each product sold. Finally, plot a column chart in the new sheet illustrating this pivot table with chart title "Revenue of each product" and wit…		Entry and manipulation, Formula, Pivot Table, Charts	Update cell value, Autofill, Math functions, Lookup and reference functions, Create sheet, Create Pivot Table, Create chart, Set chart title, Set chart legend
WeeklySales	1	My workbook records weekly sales and COGS but the profit has not been calculated. The necessary formula is Profit = Sales - COGS.	Calculate profit for each week in a new column with header "Profit". Then format all numbers with Accounting Number Format.	Finance&ExcelCh00-P(4)	Entry and manipulation, Formula, Formatting	Update cell value, Math functions, Autofill, Set data type
NetIncome	1	My workbook records revenue and expense. Net Income = Revenue - Total Expenses.	Calculate Net Income in a new column with header "Net Income" and format all data as accounting number type.		Entry and manipulation, Formula, Formatting	Update cell value, Math functions, Autofill, Set data type
PeriodRate	1	My workbook records the annual rates of my investments. A year can consist of several periods.	Please calculate the period rate for my data in a new column with header "Period Rate (%)", convert the results as number type, and highlight the highest result as green.	Finance&ExcelCh00-P(3)	Entry and manipulation, Formula, Formatting	Update cell value, Math functions, Autofill, Set data type, Conditional formatting
Tax	1	My workbook records the weekly sales of my company and is used to compute taxes. The necessary formulas are as follows: Profit Before Tax = Sales - Total Expenses Before Tax; Tax Expense = Profit Before Tax * Tax Rate.	Can you help me calculate Profit Before Tax for all weeks? Then work out the tax expenses. The tax rate is 22.50%. Don't forget to format the results with Accounting Number Format.	Finance&ExcelCh00-P(5)	Entry and manipulation, Formula, Formatting	Update cell value, Math functions, Autofill, Set data type
MaturityDate	1	My workbook records my loans with their lengths in days.	I want to work out the maturity date for all the loads. Please do it for me in a new column with header "Maturity Date".	Finance&ExcelCh00-P(7)	Entry and manipulation, Formula	Update cell value, Math functions, Autofill
StockChange	1	My workbook records the values of my stocks on two dates.	Compute the percentage change for the stock between the two dates in a new column with header "% Change". Format the stock values as currency and the value change as percentage.	Finance&ExcelCh00-P(9)	Entry and manipulation, Formula, Formatting	Update cell value, Math functions, Autofill, Set data type
IncomeStatement	1	My workbook records the yearly accounting data of my company. The necessary accounting formulas are as follows: Gross Profit = Net Sales – Cost of Goods Sold (COGS); Operating Profit = Gross Profit - Operating Expenses; Net Profit = Operating Profit - Tax Expense.	Help me fill in the Gross profit column, Operating profit column and Net profit column and set all values as accounting type.	https://www.freshbooks.com/accounting-templates/income-statement	Entry and manipulation, Formula, Formatting	Update cell value, Math functions, Autofill, Set data type
IncomeStatement2	1	My workbook records the yearly accounting data of my company. The necessary accounting formulas are as follows: Gross Profit = Net Sales – Cost of Goods Sold (COGS); Net sales = Sales - Sales return - Discounts and allowances; Cost of goods sold = Materials charges + Labor charges + Overhead; Gross profit = Net sales - Cost of goods sold.	Calculate Net Sales, Cost of goods sold, and Gross profit for all years. Set all values as accounting type and adjust the font size of all numbers to 10.	https://www.freshbooks.com/accounting-templates/income-statement	Entry and manipulation, Formula	Update cell value, Math functions, Autofill, Set data type, Format cells
SmallBalanceSheet	1	My workbook records the total assets, liabilities, and owner’s equity. Here are the necessary financial formulas: Assets = Current Assets + Fixed Assets + Other Assets; Liabilities & Owner's Equity = Current Liabilities + Long-term Liabilities + Owner's Equity.	Can you help me fill in the Assets and Liabilities & Owner's Equity columns? Don't forget to set all cells an accounting number type.		Entry and manipulation, Formula, Formatting	Update cell value, Math functions, Autofill, Set data type
SimpleCompoundInterest	1	My workbook is blank and used to record the interests of my investment. The necessary formulas are as follows: Simple Interest = Principle amount * Year * Interest rate; Compound Interest = Principle amount * (1 + Interest rate) ^ Year.	If I have just invested 100 dollars (Principle amount) and the annual interest rate is 10%, how much will I earn each year? Please fill in the table to show the amount with simple interest and with compound interest for the next 20 years and set all values as accounting type. Then plot a line chart to compare the two types of interests.		Entry and manipulation, Formula, Formatting, Charts	Update cell value, Math functions, Autofill, Set data type, Create chart
FutureValue	1	My workbook records several investments whose future values need to be calculated according to the formula Future value = Present value * (1 + Annual Interest Rate / # Compound periods) ^ (Years * # Compound periods).	I want to know the future values of all my investments. Please help me calculate them in a new column with header "Future Value" and then set the results as accounting number type..		Entry and manipulation, Formula, Formatting	Update cell value, Math functions, Autofill, Set data type
PresentValue	1	My workbook records several investments whose present values need to be calculated according to the formula Present value = Future value / (1 + Annual Interest Rate / # Compound periods) ^ (Years * # Compound periods).	Given the annual rates and future values, please help me fill in the Present Value column and then set the results as accounting number type..		Entry and manipulation, Formula, Formatting	Update cell value, Math functions, Autofill, Set data type
ExpenseReport	1	My workbook records all aspects of expenses but has not yet been completed. The necessary formulas are as follows: Tax = Subtotal * Tax rate; Total = Subtotal + Tax.	Fill out the Tax and Total columns for me using Tax Rate = 13%. Then, in a new row, calculate the Total Expenses for each of the last three columns. Don't forget to format all results with Accounting number type.		Entry and manipulation, Formula, Formatting	Update cell value, Math functions, Autofill, Set data type
DemographicProfile	1	My workbook records information of respondents.	Please create a new sheet. Merge cells A1:C1 in the new sheet and write "Demographic Profile" with blue fill and bold white text. Then I want to create three pivot tables to show the frequency and percentage of Sex (at A2), Civil Status (at A7), and Highest Educational Attainment (at A13).		Entry and manipulation, Formatting, Pivot Table	Merge cells, Update cell value, Format cells, Create Pivot Table, Set summary type
GDPBreakdown	1	I have two sheets: Sheet "Sheet1" records economic indicators of countries across the years. Sheet "Sheet2" records a list of chosen country names.	I would like you to extract a breakdown of the data in sheet 1 based on three criteria and place it into a new sheet. The criteria are as follows: (1) "Gross Domestic Product (GDP)" from the IndicatorName field, (2) only the countries listed in sheet 2 should be included, and (3) Data from 2000 to 2002 are not needed. In the new sheet, create a stacked area chart with title "GDP Growth" to displa…		Entry and manipulation, Management, Charts	Filter, Delete, Create sheet, Copy-paste range, Create chart, Set chart title, Freeze panes
EasyGDPBreakdown	1	My workbook records the economic indicators of countries across many years.	I would like you to extract a breakdown of the data and place it into a new sheet. The requirements are as follows: (1) Keep only "Gross Domestic Product (GDP)" from the IndicatorName field, (2) I don't need the data from 2000 to 2002. In the new sheet, create a stacked area chart to display the GDP growth for the countries whose GDP in 2013 ranked top 10 (do not delete other countries' data). Sh…		Entry and manipulation, Management, Charts	Filter, Delete, Create sheet, Copy-paste range, Sort, Create chart, Set chart axis, Set chart legend, Set chart title
XYScatterPlot	1	My sheet shows how two variables (Range and Height) change along with the projection angle.	I want you to draw a scatter plot showing the relationships between Range/Height and Angle. To prettify the plot, move the legend to the left. Set the marker shape of Range as square and that of Height as triangle. Set the horizontal axis label as the column A header and turn off the vertical axis. Finally, add a polynomial trendline for the Range series and a linear trendline for the Height seri…	GregoryExcelLesson01-04-Data&X-Y-Scatter	Charts	Set chart legend, Set chart marker, Set chart axis, Set trend line
VelocityDisplacement	1	My sheet records velocity against displacement.	Plot a scatter chart showing displacement (X-axis) against velocity (Y-axis). Set the X-axis label as the column A header and the Y-axis label as the column B header. Then draw a linear trend line with its equation displayed.	GregoryExcelLesson01-04-LinearTrendLine (2)	Charts	Set chart axis, Set trend line
Dragging	1	My sheet records data from an experiment where one hanging block (m2) drags a block (m1=0.75 kg) on a frictionless table via a rope around a frictionless and massless pulley.	I have filled in B2 and need you to fill out other rows in column B. Then draw a scatter plot with smooth lines to show column A (X-axis) vs. column B (Y-axis). Set the axis titles as the two corresponding column headers and the chart title as "Acceleration vs. Hanging Mass".	GregoryExcelLesson01-04-Formula Inputs	Entry and manipulation, Charts	Autofill, Set chart axis, Set chart title
RampUpAndDown	1	My sheet records the accelerations of a block in two physical scenarios but has not been completed. One scenario is in columns A to B while the other is in C to D.	I have compute the acceleration in row 2 and I want you to fill out other rows for column B and E. Next draw a scatter plot showing the trends for the two scenarios. Turn on the legends at bottom. Set the X-axis title as "Hanging mass (kg)" and Y-axis title as "Acceleration (m/s^2)".		Entry and manipulation, Charts	Autofill, Set chart legend, Set chart title
