# Supplementary material
Source: ML conference proceedings conference paper supplement (https://openreview.net/forum?id=tfyr2zRVoK)
Supplement: supplementary_material [file BoomerangSales_Ans.xlsx]

## Sheet: Sheet1
Date Time	Web Site	Product	Type	Quantity	Discount	Revenue
2015-09-08 10:13:00	amazon.com	Aspen	Wholesale	33	0.165	604.83
2015-12-11 23:26:00	ebay.com	Yanaki	Wholesale	29	0.15	590.37
2015-12-19 18:10:56	amazon.com	Bellen	Retail	3	0.019	73.58
2015-08-23 12:55:00	ebay.com	Quad	Wholesale	36	0.15	1222.47
2015-07-09 05:02:58	coloradoboomerangs.com	Crested Beaut	Wholesale	38	0.15	579.79
2015-06-30 16:40:56	ebay.com	Manu LD	Retail	4	0	1000
2015-07-01 13:16:01	coloradoboomerangs.com	Bellen	Retail	4	0	100
2015-08-02 04:06:57	gel-boomerang.com	Fire Aspen	Wholesale	93	0.375	1278.75
2015-11-16 12:15:59	ebay.com	Sunspot	Wholesale	64	0.375	560
2014-12-09 19:48:00	coloradoboomerangs.com	Bower Aussie Round	Retail	3	0	129
2015-12-08 08:22:59	amazon.com	Quad	Wholesale	124	0.594	2011.24
2014-12-13 16:30:00	ebay.com	Fun Fly	Wholesale	30	0.15	127.5
2015-08-23 03:07:03	amazon.com	Aspen	Retail	8	0.072	162.96
2015-11-20 11:00:57	amazon.com	Carlota Doublers	Retail	4	0.019	294.3
2015-08-26 11:04:59	amazon.com	Aspen	Retail	3	0.019	64.6
2015-12-12 14:21:59	amazon.com	Aspen	Wholesale	91	0.356	1286.36
2014-12-13 12:40:01	gel-boomerang.com	Fun Fly	Retail	2	0	10
2014-12-12 16:35:02	amazon.com	Fun Fly	Wholesale	37	0.159	155.59
2015-07-28 15:16:59	coloradoboomerangs.com	Fun Fly	Retail	2	0	10
2015-08-25 16:46:59	amazon.com	Aspen	Retail	6	0.072	122.22
2015-12-20 12:34:59	amazon.com	Fun Fly	Wholesale	35	0.16	147
2015-08-29 14:06:00	amazon.com	Manu MTA	Retail	1	0.019	117.72
2015-02-28 11:45:01	coloradoboomerangs.com	Bower Aussie Round	Retail	3	0	129
2015-07-13 05:30:02	amazon.com	Sunshine	Wholesale	34	0.169	565.08
2015-08-14 09:49:58	coloradoboomerangs.com	Fire Aspen	Retail	3	0	66
2015-11-27 11:33:56	coloradoboomerangs.com	GelFast	Retail	1	0	24
2015-11-03 12:30:57	amazon.com	Fun Fly	Retail	5	0.071	23.23
2015-04-09 12:43:03	ebay.com	Sunset	Wholesale	68	0.375	1105
2015-12-08 18:15:59	coloradoboomerangs.com	Fun Fly	Retail	4	0	20
2015-02-19 22:13:00	ebay.com	Fun Fly	Retail	2	0	10
2015-12-12 08:45:01	ebay.com	Carlota Doublers	Retail	1	0	75
2014-12-09 12:11:57	coloradoboomerangs.com	Aspen	Retail	1	0	21.95
2014-12-07 19:44:58	amazon.com	Carlota Doublers	Retail	3	0.018	220.95
2014-12-06 17:46:01	amazon.com	Fun Fly	Retail	1	0.019	4.91
2015-06-03 03:54:00	coloradoboomerangs.com	Crested Beaut	Retail	4	0	71.8

## Sheet: Retail Price
Product	Retail Price
Alpine	21.95
Aspen	21.95
Carlota	19.95
Crested Beaut	17.95
Majestic Beaut	26.95
Sunshine	20
Bellen	25
Eagle	21.95
Yanaki	23.95
Phoenix	23.95
Darnell Tri Fly	9.95
Fun Fly	5
Fire Aspen	22
Sunset	26
Sunspot	14
Carlota Doublers	75
GelFast	24
Frido Fast Catch	50
Manu MTA	120
Manu LD	250
Bower Aussie Round	43
Quad	39.95

## Sheet: 1
Row Labels	Count of Web Site
amazon.com	15
coloradoboomerangs.com	10
ebay.com	8
gel-boomerang.com	2
Grand Total	35

## Sheet: 2
Row Labels	Sum of Revenue
Aspen	2262.92
Bellen	173.58
Bower Aussie Round	258
Carlota Doublers	590.25
Crested Beaut	651.59
Fire Aspen	1344.75
Fun Fly	508.23
GelFast	24
Manu LD	1000
Manu MTA	117.72
Quad	3233.71
Sunset	1105
Sunshine	565.08
Sunspot	560
Yanaki	590.37
Grand Total	12985.2
