# Supplementary material
Source: ML conference proceedings conference paper supplement (https://openreview.net/forum?id=tfyr2zRVoK)
Supplement: supplementary_material [file DemographicProfile_Ans.xlsx]

## Sheet: Sheet1
Respondents	Sex	Civil Status	Highest Educational Attainment
1	Female	Single	Elementary
2	Male	Single	College
3	Male	Widow	Elementary
4	Male	Widow	Junior High School
5	Male	Widow	College
6	Female	Single	College
7	Female	Widow	Elementary
8	Male	Widow	Senior High School
9	Male	Single	Senior High School
10	Male	Widow	Senior High School
11	Female	Single	Elementary
12	Female	Married	College
13	Female	Widow	Senior High School
14	Male	Married	Junior High School
15	Male	Widow	Elementary
16	Male	Widow	College
17	Male	Widow	Elementary
18	Female	Widow	Elementary
19	Female	Single	Senior High School
20	Female	Single	Junior High School
21	Male	Married	Elementary
22	Male	Single	College
23	Female	Married	College
24	Male	Married	Elementary
25	Male	Widow	College
26	Female	Married	Elementary
27	Male	Single	College
28	Female	Married	College
29	Female	Widow	Junior High School
30	Female	Widow	Elementary
31	Male	Married	Junior High School
32	Female	Widow	Junior High School
33	Female	Widow	Senior High School
34	Male	Widow	College
35	Male	Single	Senior High School
36	Male	Married	College
37	Female	Single	Elementary
38	Male	Married	Elementary
39	Male	Married	College
40	Male	Single	Senior High School

## Sheet: 1
Demographic Profile
Row Labels	Count of Sex	% of Sex
Female	17	0.425
Male	23	0.575
Grand Total	40	1
Row Labels	Count of Civil Status	% of Civil Status
Married	11	0.275
Single	12	0.3
Widow	17	0.425
Grand Total	40	1
Row Labels	Count of Highest Educational Attainment	% of Highest Educational Attainment
College	13	0.325
Elementary	13	0.325
Junior High School	6	0.15
Senior High School	8	0.2
Grand Total	40	1
