# Supplementary material
Source: ML conference proceedings conference paper supplement (https://openreview.net/forum?id=tfyr2zRVoK)
Supplement: supplementary_material [file Dragging_Ans.xlsx]

## Sheet: 1
Hanging Mass (m2) (kg)	Acceleration (m/s^2)
0	0
0.01	0.128947
0.02	0.254545
0.03	0.376923
0.04	0.496203
0.05	0.6125
0.06	0.725926
0.07	0.836585
0.08	0.944578
0.09	1.05
0.1	1.15294
0.11	1.25349
0.12	1.35172
0.13	1.44773
0.14	1.54157
0.15	1.63333
0.16	1.72308
0.17	1.81087
0.18	1.89677
0.19	1.98085
0.2	2.06316
0.21	2.14375
0.22	2.22268
0.23	2.3
0.24	2.37576
0.25	2.45
0.26	2.52277
0.27	2.59412
0.28	2.66408
0.29	2.73269
0.3	2.8
0.31	2.86604
0.32	2.93084
0.33	2.99444
0.34	3.05688
0.35	3.11818
0.36	3.17838
0.37	3.2375
0.38	3.29558
0.39	3.35263
0.4	3.4087
0.41	3.46379
0.42	3.51795
0.43	3.57119
0.44	3.62353
0.45	3.675
0.46	3.72562
0.47	3.77541
0.48	3.82439
0.49	3.87258
0.5	3.92
0.51	3.96667
0.52	4.0126
0.53	4.05781
0.54	4.10233
0.55	4.14615
0.56	4.18931
0.57	4.23182
0.58	4.27368
0.59	4.31493
0.6	4.35556
0.61	4.39559
0.62	4.43504
0.63	4.47391
0.64	4.51223
0.65	4.55
0.66	4.58723
0.67	4.62394
0.68	4.66014
0.69	4.69583
0.7	4.73103
0.71	4.76575
0.72	4.8
0.73	4.83378
0.74	4.86711
0.75	4.9
0.76	4.93245
0.77	4.96447
0.78	4.99608
0.79	5.02727
0.8	5.05806
0.81	5.08846
0.82	5.11847
0.83	5.1481
0.84	5.17736
0.85	5.20625
0.86	5.23478
0.87	5.26296
0.88	5.2908
0.89	5.31829
0.9	5.34545
0.91	5.37229
0.92	5.3988
0.93	5.425
0.94	5.45089
0.95	5.47647
0.96	5.50175
0.97	5.52674
0.98	5.55145
0.99	5.57586
1	5.6
1.01	5.62386
1.02	5.64746
1.03	5.67079
1.04	5.69385
1.05	5.71667
1.06	5.73923
1.07	5.76154
1.08	5.78361
1.09	5.80543
1.1	5.82703
1.11	5.84839
1.12	5.86952
1.13	5.89043
1.14	5.91111
1.15	5.93158
1.16	5.95183
1.17	5.97188
1.18	5.99171
1.19	6.01134
1.2	6.03077
