# Supplementary material
Source: ML conference proceedings conference paper supplement (https://openreview.net/forum?id=tfyr2zRVoK)
Supplement: supplementary_material [file EntireSummerSales_Ans.xlsx]

## Sheet: Sheet1
Date	Month	Week	Promotion	Sales Channel	Product	Revenue
2020-09-16	Sep	38	None	In Store Sales	Doublers	160.04
2020-07-01	Jul	27	None	In Store Sales	Sunshine	40.76
2020-06-02	Jun	23	Festival of Flight	E-mail Coupon	Crested Beaut	75.62
2020-05-15	May	20	None	Web Site Sales	Quad	99.29
2020-05-17	May	21	None	In Store Sales	Carlota	46.25
2020-06-10	Jun	24	Festival of Flight	In Store Sales	Majectic Beaut	28.28
2020-05-03	May	19	None	In Store Sales	Sunset	71.86
2020-05-13	May	20	None	Web Site Sales	Carlota	46.1
2020-09-02	Sep	36	None	Web Site Sales	Bellen	23.25
2020-07-03	Jul	27	None	Web Site Sales	Sunbell	50.9
2020-06-04	Jun	23	Festival of Flight	In Store Sales	Quad	66.85
2020-09-01	Sep	36	None	Web Site Sales	Sunset	24.68
2020-09-10	Sep	37	None	Web Site Sales	Carlota	89
2020-05-21	May	21	None	Web Site Sales	Quad	68.25
2020-07-26	Jul	31	None	In Store Sales	Sunshine	20.88
2020-05-12	May	20	None	Web Site Sales	Sunbell	24.75
2020-05-12	May	20	None	Web Site Sales	Doublers	80.95
2020-07-29	Jul	31	None	Web Site Sales	Quad	306.04
2020-05-18	May	21	None	Web Site Sales	Sunshine	20.01
2020-06-30	Jun	27	None	Web Site Sales	Carlota	69.85
2020-05-29	May	22	None	In Store Sales	Quad	99
2020-06-13	Jun	24	Festival of Flight	In Store Sales	Quad	68.39
2020-07-16	Jul	29	None	Web Site Sales	FlatTop	28.92
2020-07-29	Jul	31	None	In Store Sales	Carlota	46.85
2020-09-11	Sep	37	None	Web Site Sales	Aspen	479.13
2020-06-10	Jun	24	Festival of Flight	Web Site Sales	Sunset	47.35
2020-05-18	May	21	None	Web Site Sales	Sunbell	75.91
2020-06-28	Jun	27	None	Web Site Sales	Sunshine	60.4
2020-06-14	Jun	25	Festival of Flight	Web Site Sales	Sunbell	48.59
2020-07-08	Jul	28	None	Web Site Sales	Sunbell	23.48
2020-05-07	May	19	None	In Store Sales	Aspen	20.72
2020-07-28	Jul	31	None	Web Site Sales	Sunshine	60.73
2020-05-10	May	20	None	Web Site Sales	Majectic Beaut	413.97
2020-07-08	Jul	28	None	Web Site Sales	Sunshine	40.6
2020-05-31	May	23	Festival of Flight	Web Site Sales	Sunshine	57.14
2020-09-03	Sep	36	None	E-mail Coupon	FlatTop	83.12
2020-07-18	Jul	29	None	E-mail Coupon	Crested Beaut	72.02
2020-09-12	Sep	37	None	E-mail Coupon	Aspen	80.27
2020-09-06	Sep	37	None	E-mail Coupon	Sunshine	60.95
2020-05-11	May	20	None	In Store Sales	Carlota	23.07
2020-06-13	Jun	24	Festival of Flight	In Store Sales	Sunshine	60.63
2020-07-14	Jul	29	None	Web Site Sales	Aspen	40.43
2020-07-27	Jul	31	None	In Store Sales	Sunshine	40.34
2020-07-14	Jul	29	None	In Store Sales	Sunshine	19.05
2020-05-18	May	21	None	E-mail Coupon	Sunshine	40.36
2020-06-27	Jun	26	Festival of Flight	Web Site Sales	Majectic Beaut	90.41
2020-09-07	Sep	37	None	E-mail Coupon	Carlota	23.46
2020-07-24	Jul	30	None	Web Site Sales	Crested Beaut	46.27
2020-09-17	Sep	38	None	In Store Sales	FlatTop	83.46
2020-06-09	Jun	24	Festival of Flight	Web Site Sales	Sunbell	50.34
2020-07-21	Jul	30	None	In Store Sales	Bellen	46.37
2020-05-26	May	22	None	Web Site Sales	Carlota	23.79
2020-07-25	Jul	30	None	Web Site Sales	FlatTop	28.04
2020-05-21	May	21	None	Web Site Sales	Crested Beaut	251.68
2020-06-24	Jun	26	Festival of Flight	Web Site Sales	Quad	68.9
2020-09-10	Sep	37	None	In Store Sales	Doublers	160.76
2020-09-05	Sep	36	None	Web Site Sales	Sunshine	60.3
2020-06-27	Jun	26	Festival of Flight	Web Site Sales	Sunbell	50.12
2020-06-29	Jun	27	None	In Store Sales	FlatTop	470.63
2020-05-26	May	22	None	E-mail Coupon	Quad	68.45
2020-09-22	Sep	39	None	In Store Sales	Sunbell	342.28
2020-09-29	Sep	40	None	In Store Sales	Majectic Beaut	29.19
2020-07-08	Jul	28	None	In Store Sales	Bellen	46.92
2020-09-09	Sep	37	None	Web Site Sales	Bellen	23.44
2020-07-27	Jul	31	None	In Store Sales	Sunbell	48.2
2020-09-25	Sep	39	None	Web Site Sales	V-Rang	57.84
2020-05-15	May	20	None	Web Site Sales	Aspen	42.01
2020-09-06	Sep	37	None	Web Site Sales	Sunshine	40.05
2020-07-21	Jul	30	None	E-mail Coupon	Bellen	23.92
2020-07-24	Jul	30	None	E-mail Coupon	Carlota	92.84
2020-07-20	Jul	30	None	In Store Sales	Bellen	69.71
2020-09-23	Sep	39	None	E-mail Coupon	Quad	66.22
2020-07-01	Jul	27	None	In Store Sales	Sunbell	24.03
2020-07-08	Jul	28	None	Web Site Sales	FlatTop	55.43
2020-09-19	Sep	38	None	In Store Sales	Sunset	71.44
2020-05-05	May	19	None	In Store Sales	Carlota	22.34
2020-09-02	Sep	36	None	Web Site Sales	Carlota	46.86
2020-05-29	May	22	None	Web Site Sales	Majectic Beaut	203.87
2020-06-25	Jun	26	Festival of Flight	Web Site Sales	Bellen	66.62
2020-09-23	Sep	39	None	E-mail Coupon	FlatTop	27.14
2020-06-08	Jun	24	Festival of Flight	In Store Sales	Carlota	521.17
2020-05-15	May	20	None	In Store Sales	Sunshine	379.16
2020-05-01	May	18	None	In Store Sales	Sunshine	40.97
2020-09-10	Sep	37	None	Web Site Sales	Quad	102.52
2020-07-09	Jul	28	None	Web Site Sales	Quad	33.61
2020-09-24	Sep	39	None	Web Site Sales	Quad	99.11
2020-06-25	Jun	26	Festival of Flight	In Store Sales	Sunshine	57.17
2020-06-25	Jun	26	Festival of Flight	In Store Sales	Crested Beaut	24.05
2020-09-14	Sep	38	None	Web Site Sales	Bellen	69.4
2020-06-12	Jun	24	Festival of Flight	Web Site Sales	Quad	32.81
2020-07-20	Jul	30	None	In Store Sales	FlatTop	549.7
2020-06-01	Jun	23	Festival of Flight	In Store Sales	Sunset	45.9
2020-09-01	Sep	36	None	E-mail Coupon	Sunbell	23.95
2020-09-22	Sep	39	None	Web Site Sales	Bellen	69.17
2020-07-30	Jul	31	None	Web Site Sales	Bellen	46.31
2020-05-17	May	21	None	Web Site Sales	Sunbell	48.95
2020-05-24	May	22	None	In Store Sales	Quad	34.46
2020-09-09	Sep	37	None	Web Site Sales	Carlota	69.76
2020-07-10	Jul	28	None	In Store Sales	Carlota	66.64
2020-05-15	May	20	None	E-mail Coupon	Carlota	69.64
2020-09-07	Sep	37	None	Web Site Sales	Crested Beaut	69.89
2020-07-08	Jul	28	None	Web Site Sales	Sunshine	40.73
2020-07-21	Jul	30	None	Web Site Sales	Sunshine	20.56
2020-05-03	May	19	None	Web Site Sales	Aspen	57.98
2020-07-19	Jul	30	None	Web Site Sales	Sunbell	48.81
2020-05-05	May	19	None	Web Site Sales	Sunset	69
2020-09-11	Sep	37	None	In Store Sales	FlatTop	83.52
2020-09-03	Sep	36	None	In Store Sales	Bellen	69.74
2020-09-28	Sep	40	None	In Store Sales	Majectic Beaut	58.26
2020-07-19	Jul	30	None	Web Site Sales	Doublers	160.72
2020-05-20	May	21	None	In Store Sales	Quad	64.07
2020-07-01	Jul	27	None	Web Site Sales	Bellen	23.87
2020-09-09	Sep	37	None	In Store Sales	Sunshine	40.08
2020-09-11	Sep	37	None	Web Site Sales	FlatTop	83.29
2020-07-27	Jul	31	None	Web Site Sales	Sunset	424.31
2020-09-02	Sep	36	None	E-mail Coupon	Crested Beaut	24.82
2020-07-03	Jul	27	None	In Store Sales	Carlota	66.92
2020-06-11	Jun	24	Festival of Flight	Web Site Sales	Sunbell	48.4
2020-05-19	May	21	None	In Store Sales	FlatTop	83.96
2020-06-25	Jun	26	Festival of Flight	In Store Sales	Sunset	342.07
2020-06-16	Jun	25	Festival of Flight	Web Site Sales	Aspen	60.75
2020-07-11	Jul	28	None	In Store Sales	Carlota	46.51
2020-06-20	Jun	25	Festival of Flight	Web Site Sales	Bellen	161.34
2020-05-11	May	20	None	In Store Sales	Carlota	69.6
2020-09-22	Sep	39	None	Web Site Sales	Sunshine	20.67
2020-06-10	Jun	24	Festival of Flight	Web Site Sales	Bellen	46.53
2020-07-21	Jul	30	None	Web Site Sales	Sunbell	50.12
2020-09-12	Sep	37	None	In Store Sales	Bellen	44.17
2020-07-16	Jul	29	None	Web Site Sales	Carlota	69.99
2020-09-17	Sep	38	None	Web Site Sales	Carlota	46.7
2020-05-03	May	19	None	Web Site Sales	Majectic Beaut	29.46
2020-05-21	May	21	None	Web Site Sales	Sunset	268.61
2020-09-03	Sep	36	None	In Store Sales	Aspen	20.57
2020-09-24	Sep	39	None	E-mail Coupon	Quad	99.85
2020-06-07	Jun	24	Festival of Flight	In Store Sales	Sunset	71.95
2020-07-05	Jul	28	None	Web Site Sales	Sunbell	25.92
2020-06-14	Jun	25	Festival of Flight	Web Site Sales	Majectic Beaut	60.57
2020-07-13	Jul	29	None	Web Site Sales	Carlota	23.39
2020-09-20	Sep	39	None	Web Site Sales	Sunshine	40.57
2020-05-24	May	22	None	Web Site Sales	Carlota	44.26
2020-06-29	Jun	27	None	Web Site Sales	Quad	264.35
2020-06-17	Jun	25	Festival of Flight	Web Site Sales	Sunbell	24.55
2020-05-20	May	21	None	E-mail Coupon	Sunshine	20.68
2020-09-16	Sep	38	None	Web Site Sales	Quad	99.1
2020-09-24	Sep	39	None	Web Site Sales	Sunshine	20.56
2020-05-25	May	22	None	Web Site Sales	Bellen	46.58
2020-07-17	Jul	29	None	Web Site Sales	Quad	132.68
2020-09-17	Sep	38	None	Web Site Sales	Sunset	23.04
2020-07-26	Jul	31	None	Web Site Sales	Carlota	46.84
2020-09-02	Sep	36	None	Web Site Sales	Bellen	46.26
2020-09-12	Sep	37	None	In Store Sales	Sunshine	40.81
2020-09-21	Sep	39	None	E-mail Coupon	Sunshine	20.62
2020-06-22	Jun	26	Festival of Flight	Web Site Sales	Quad	165.67
2020-07-23	Jul	30	None	Web Site Sales	Quad	66.58
2020-07-29	Jul	31	None	Web Site Sales	Carlota	23.12
2020-09-29	Sep	40	None	Web Site Sales	Bellen	88.37
2020-07-11	Jul	28	None	Web Site Sales	Sunshine	60.87
2020-09-02	Sep	36	None	In Store Sales	Quad	99.74
2020-07-19	Jul	30	None	Web Site Sales	Sunbell	333.15
2020-09-08	Sep	37	None	Web Site Sales	Doublers	320.55
2020-05-19	May	21	None	E-mail Coupon	Crested Beaut	25.16
2020-05-20	May	21	None	In Store Sales	Sunbell	48.52
2020-05-16	May	20	None	In Store Sales	Doublers	160.85
2020-05-30	May	22	None	E-mail Coupon	Carlota	305.94
2020-05-26	May	22	None	In Store Sales	Quad	99.09
2020-05-04	May	19	None	Web Site Sales	Bellen	92.45
2020-09-11	Sep	37	None	Web Site Sales	FlatTop	55.43
2020-07-15	Jul	29	None	Web Site Sales	Sunshine	40.85
2020-07-26	Jul	31	None	In Store Sales	Sunshine	57.52
2020-06-09	Jun	24	Festival of Flight	E-mail Coupon	Quad	66.2
2020-07-22	Jul	30	None	Web Site Sales	Sunshine	40.28
2020-05-23	May	21	None	Web Site Sales	Bellen	46.16
2020-07-17	Jul	29	None	Web Site Sales	Sunshine	20.39
2020-07-26	Jul	31	None	Web Site Sales	Bellen	115.08
2020-09-17	Sep	38	None	Web Site Sales	Majectic Beaut	523.09
2020-09-12	Sep	37	None	Web Site Sales	Quad	102.47
2020-05-30	May	22	None	In Store Sales	Quad	66.22
2020-07-20	Jul	30	None	Web Site Sales	Quad	32.15
2020-09-25	Sep	39	None	E-mail Coupon	Bellen	69.68
2020-06-29	Jun	27	None	In Store Sales	Carlota	414.73
2020-07-22	Jul	30	None	In Store Sales	Aspen	40.52
2020-09-20	Sep	39	None	Web Site Sales	Quad	68.19
2020-09-07	Sep	37	None	Web Site Sales	Quad	102.82
2020-07-03	Jul	27	None	In Store Sales	Quad	132.81
2020-05-10	May	20	None	Web Site Sales	Sunbell	25.48
2020-05-08	May	19	None	Web Site Sales	Aspen	209.67
2020-05-11	May	20	None	In Store Sales	Crested Beaut	48.41
2020-07-04	Jul	27	None	Web Site Sales	Sunbell	50.92
2020-07-07	Jul	28	None	In Store Sales	Bellen	44.09
2020-05-14	May	20	None	Web Site Sales	Sunbell	48.09
2020-05-09	May	19	None	In Store Sales	Aspen	20.28
2020-09-15	Sep	38	None	In Store Sales	Sunbell	46.39
2020-06-15	Jun	25	Festival of Flight	In Store Sales	Sunshine	100.85
2020-09-02	Sep	36	None	Web Site Sales	Sunbell	48.79
2020-05-27	May	22	None	In Store Sales	Doublers	80.03
2020-05-12	May	20	None	E-mail Coupon	Quad	66.08
2020-05-08	May	19	None	Web Site Sales	Sunshine	60.99
2020-09-20	Sep	39	None	Web Site Sales	Sunshine	40.7
2020-05-19	May	21	None	Web Site Sales	Quad	64.47
2020-05-06	May	19	None	Web Site Sales	Sunshine	40.53
2020-05-27	May	22	None	In Store Sales	Carlota	69.3
2020-09-17	Sep	38	None	In Store Sales	Quad	102.29
2020-09-30	Sep	40	None	In Store Sales	Majectic Beaut	30.06
2020-06-26	Jun	26	Festival of Flight	Web Site Sales	Sunbell	48.72
2020-05-19	May	21	None	In Store Sales	Sunbell	72.92
2020-05-10	May	20	None	In Store Sales	Quad	32.84
2020-07-20	Jul	30	None	In Store Sales	Quad	690.21
2020-07-22	Jul	30	None	In Store Sales	Aspen	40.81
2020-09-07	Sep	37	None	In Store Sales	Bellen	23.83
2020-07-04	Jul	27	None	In Store Sales	Carlota	396.18
2020-06-25	Jun	26	Festival of Flight	Web Site Sales	Majectic Beaut	58.32
2020-05-24	May	22	None	Web Site Sales	Quad	306.2
2020-07-19	Jul	30	None	E-mail Coupon	Majectic Beaut	60.41
2020-05-25	May	22	None	In Store Sales	Majectic Beaut	112.68
2020-05-15	May	20	None	In Store Sales	Quad	33.77
2020-07-19	Jul	30	None	In Store Sales	Carlota	22.31
2020-05-05	May	19	None	In Store Sales	V-Rang	54.75
2020-06-30	Jun	27	None	In Store Sales	Bellen	46.83
2020-07-05	Jul	28	None	Web Site Sales	Sunset	24.75
2020-07-25	Jul	30	None	Web Site Sales	Sunshine	20.83
2020-09-05	Sep	36	None	In Store Sales	Quad	238.6
2020-07-12	Jul	29	None	Web Site Sales	Bellen	23.1
2020-05-30	May	22	None	In Store Sales	Quad	66.33
2020-07-27	Jul	31	None	Web Site Sales	Quad	66.2
2020-05-05	May	19	None	In Store Sales	Quad	68.71
2020-05-22	May	21	None	Web Site Sales	Sunshine	38.84
2020-07-09	Jul	28	None	Web Site Sales	Carlota	69.08
2020-07-07	Jul	28	None	Web Site Sales	Bellen	23.14
2020-05-25	May	22	None	E-mail Coupon	Quad	68.21
2020-09-09	Sep	37	None	E-mail Coupon	Aspen	105.14
2020-06-29	Jun	27	None	In Store Sales	Sunset	188.73
2020-09-10	Sep	37	None	In Store Sales	Carlota	69.1
2020-07-15	Jul	29	None	In Store Sales	Crested Beaut	240.41
2020-05-06	May	19	None	In Store Sales	Carlota	69.98
2020-09-22	Sep	39	None	In Store Sales	FlatTop	55.3
2020-05-03	May	19	None	Web Site Sales	Quad	99.67
2020-05-12	May	20	None	Web Site Sales	Crested Beaut	96.11
2020-07-06	Jul	28	None	In Store Sales	Doublers	160.15
2020-09-26	Sep	39	None	In Store Sales	Quad	66.93
2020-07-04	Jul	27	None	In Store Sales	Carlota	66.66
2020-05-04	May	19	None	In Store Sales	Bellen	44.15
2020-07-13	Jul	29	None	In Store Sales	Crested Beaut	72.98
2020-05-21	May	21	None	E-mail Coupon	Sunshine	40.36
2020-09-22	Sep	39	None	Web Site Sales	Aspen	57.84
2020-07-09	Jul	28	None	In Store Sales	Carlota	392.42
2020-09-26	Sep	39	None	In Store Sales	Bellen	44.32
2020-05-11	May	20	None	Web Site Sales	Aspen	63.02
2020-09-14	Sep	38	None	Web Site Sales	Sunbell	48.15
2020-05-18	May	21	None	In Store Sales	Sunshine	20.24
2020-09-19	Sep	38	None	Web Site Sales	Doublers	228.86
2020-09-12	Sep	37	None	In Store Sales	Carlota	69.02
2020-06-03	Jun	23	Festival of Flight	Web Site Sales	Doublers	312.94
2020-07-07	Jul	28	None	Web Site Sales	Doublers	240.7
2020-08-02	Aug	32	Fall Kite Event	Web Site Sales	Quad	517.89
2020-09-26	Sep	39	None	Web Site Sales	Sunshine	80.27
2020-07-13	Jul	29	None	Web Site Sales	Sunbell	75.09
2020-05-07	May	19	None	Web Site Sales	Crested Beaut	23.38
2020-05-14	May	20	None	Web Site Sales	Carlota	69.19
2020-09-27	Sep	40	None	In Store Sales	V-Rang	36.34
2020-07-17	Jul	29	None	Web Site Sales	Carlota	69.68
2020-07-21	Jul	30	None	In Store Sales	Carlota	22.86
2020-07-06	Jul	28	None	Web Site Sales	Bellen	66.75
2020-07-03	Jul	27	None	Web Site Sales	Quad	66.9
2020-07-04	Jul	27	None	Web Site Sales	Sunshine	40.07
2020-09-22	Sep	39	None	Web Site Sales	Sunshine	40.83
2020-07-17	Jul	29	None	In Store Sales	Carlota	46.27
2020-07-27	Jul	31	None	Web Site Sales	Bellen	66.38
2020-07-21	Jul	30	None	Web Site Sales	Crested Beaut	72.74
2020-07-08	Jul	28	None	Web Site Sales	Bellen	69.55
2020-06-30	Jun	27	None	In Store Sales	Majectic Beaut	87.58
2020-07-02	Jul	27	None	E-mail Coupon	Quad	32.92
2020-07-10	Jul	28	None	In Store Sales	Quad	376.52
2020-07-01	Jul	27	None	In Store Sales	Sunset	71.94
2020-07-20	Jul	30	None	In Store Sales	Aspen	20.22
2020-09-14	Sep	38	None	In Store Sales	Aspen	40.24
2020-09-11	Sep	37	None	In Store Sales	Quad	752.68
2020-08-19	Aug	34	Fall Kite Event	In Store Sales	Sunset	71.8
2020-09-14	Sep	38	None	E-mail Coupon	Carlota	69.5
2020-09-14	Sep	38	None	Web Site Sales	Quad	66.13
2020-06-03	Jun	23	Festival of Flight	E-mail Coupon	Aspen	40.44
2020-09-26	Sep	39	None	In Store Sales	Bellen	46.98
2020-05-23	May	21	None	E-mail Coupon	Sunshine	60.45
2020-09-21	Sep	39	None	Web Site Sales	Sunshine	40.98
2020-07-09	Jul	28	None	In Store Sales	Carlota	22.27
2020-05-21	May	21	None	In Store Sales	Bellen	46.21
2020-05-13	May	20	None	Web Site Sales	Quad	99.51
2020-07-28	Jul	31	None	E-mail Coupon	Bellen	44.01
2020-09-05	Sep	36	None	Web Site Sales	Quad	68.2
2020-09-03	Sep	36	None	Web Site Sales	Bellen	46.07
2020-08-15	Aug	33	Fall Kite Event	Web Site Sales	Sunset	45.82
2020-09-29	Sep	40	None	In Store Sales	Quad	34.48
2020-07-18	Jul	29	None	In Store Sales	Crested Beaut	72.19
2020-07-24	Jul	30	None	Web Site Sales	Sunbell	48.64
2020-05-17	May	21	None	Web Site Sales	Carlota	46.55
2020-05-08	May	19	None	In Store Sales	Majectic Beaut	84.64
2020-06-12	Jun	24	Festival of Flight	In Store Sales	Sunset	47.68
2020-09-27	Sep	40	None	Web Site Sales	Majectic Beaut	30.27
2020-09-09	Sep	37	None	In Store Sales	Quad	33.62
2020-07-02	Jul	27	None	In Store Sales	Sunbell	50.44
2020-07-29	Jul	31	None	In Store Sales	Bellen	46.92
2020-08-16	Aug	34	Fall Kite Event	Web Site Sales	Sunbell	24.56
2020-05-04	May	19	None	Web Site Sales	Carlota	23.52
2020-05-24	May	22	None	In Store Sales	Bellen	23.56
2020-07-04	Jul	27	None	Web Site Sales	Sunbell	75.4
2020-09-13	Sep	38	None	In Store Sales	Carlota	69.72
2020-05-21	May	21	None	E-mail Coupon	Bellen	23.47
2020-05-17	May	21	None	In Store Sales	Bellen	66.61
2020-09-27	Sep	40	None	Web Site Sales	Quad	33.54
2020-05-21	May	21	None	In Store Sales	Carlota	46.65
2020-09-13	Sep	38	None	Web Site Sales	Bellen	22.25
2020-09-07	Sep	37	None	In Store Sales	Quad	68.05
2020-09-21	Sep	39	None	Web Site Sales	Sunshine	19.8
2020-07-09	Jul	28	None	In Store Sales	Sunset	469.48
2020-05-24	May	22	None	Web Site Sales	Carlota	44.33
2020-05-14	May	20	None	In Store Sales	Sunset	94.43
2020-06-03	Jun	23	Festival of Flight	Web Site Sales	Sunshine	57.94
2020-08-21	Aug	34	Fall Kite Event	Web Site Sales	Quad	66.77
2020-09-28	Sep	40	None	Web Site Sales	Sunshine	20.13
2020-05-08	May	19	None	Web Site Sales	Carlota	22.24
2020-05-10	May	20	None	Web Site Sales	Quad	102.35
2020-05-08	May	19	None	In Store Sales	FlatTop	55.22
2020-06-04	Jun	23	Festival of Flight	Web Site Sales	Crested Beaut	96.74
2020-06-23	Jun	26	Festival of Flight	Web Site Sales	Majectic Beaut	60.84
2020-09-02	Sep	36	None	Web Site Sales	Aspen	20.24
2020-09-03	Sep	36	None	Web Site Sales	Sunshine	80.64
2020-07-24	Jul	30	None	Web Site Sales	V-Rang	36.38
2020-05-03	May	19	None	Web Site Sales	Bellen	46.22
2020-07-16	Jul	29	None	In Store Sales	Aspen	20.57
2020-09-18	Sep	38	None	E-mail Coupon	Carlota	23.46
2020-07-04	Jul	27	None	Web Site Sales	Sunshine	80.11
2020-07-26	Jul	31	None	In Store Sales	Aspen	259.17
2020-09-08	Sep	37	None	In Store Sales	Majectic Beaut	689.96
2020-07-09	Jul	28	None	Web Site Sales	Sunshine	38.29
2020-09-15	Sep	38	None	In Store Sales	Majectic Beaut	58.17
2020-09-26	Sep	39	None	Web Site Sales	Carlota	46.08
2020-09-06	Sep	37	None	E-mail Coupon	Sunset	71.39
2020-09-14	Sep	38	None	In Store Sales	Sunshine	40.94
2020-05-17	May	21	None	Web Site Sales	Aspen	20.18
2020-07-06	Jul	28	None	In Store Sales	Bellen	46.6
2020-05-14	May	20	None	In Store Sales	Carlota	44.6
2020-09-10	Sep	37	None	In Store Sales	V-Rang	36.26
2020-07-22	Jul	30	None	Web Site Sales	Quad	32.7
2020-05-23	May	21	None	Web Site Sales	Sunshine	60.81
2020-07-15	Jul	29	None	E-mail Coupon	Carlota	46.32
2020-09-08	Sep	37	None	E-mail Coupon	FlatTop	53.81
2020-07-26	Jul	31	None	In Store Sales	Majectic Beaut	58.22
2020-09-09	Sep	37	None	In Store Sales	Bellen	44.53
2020-07-31	Jul	31	None	Web Site Sales	Bellen	23.56
2020-05-06	May	19	None	In Store Sales	Bellen	44.73
2020-07-14	Jul	29	None	In Store Sales	Aspen	42.31
2020-09-25	Sep	39	None	Web Site Sales	Crested Beaut	75.73
2020-05-29	May	22	None	Web Site Sales	Sunbell	46.86
2020-09-03	Sep	36	None	In Store Sales	Quad	66.92
2020-05-20	May	21	None	E-mail Coupon	Crested Beaut	100.5
2020-06-26	Jun	26	Festival of Flight	Web Site Sales	Quad	33.92
2020-06-04	Jun	23	Festival of Flight	Web Site Sales	Sunbell	46.2
2020-07-28	Jul	31	None	Web Site Sales	Quad	439.53
2020-07-29	Jul	31	None	Web Site Sales	Bellen	46.4
2020-05-14	May	20	None	In Store Sales	Carlota	46.77
2020-09-04	Sep	36	None	Web Site Sales	Quad	66.38
2020-05-06	May	19	None	In Store Sales	Carlota	23.53
2020-07-02	Jul	27	None	E-mail Coupon	Sunshine	40.34
2020-09-30	Sep	40	None	In Store Sales	Crested Beaut	72.25
2020-05-16	May	20	None	In Store Sales	Majectic Beaut	87.66
2020-06-05	Jun	23	Festival of Flight	E-mail Coupon	Sunshine	20.61
2020-07-30	Jul	31	None	In Store Sales	Sunbell	24.4
2020-07-03	Jul	27	None	In Store Sales	Doublers	78.81
2020-09-12	Sep	37	None	Web Site Sales	Aspen	60.63
2020-05-14	May	20	None	Web Site Sales	Bellen	69.73
2020-05-19	May	21	None	Web Site Sales	Crested Beaut	46.04
2020-07-06	Jul	28	None	Web Site Sales	Bellen	23.51
2020-05-09	May	19	None	Web Site Sales	Carlota	23.36
2020-07-11	Jul	28	None	Web Site Sales	Bellen	46.86
2020-05-25	May	22	None	In Store Sales	Carlota	305.1
2020-05-23	May	21	None	E-mail Coupon	FlatTop	53.48
2020-08-15	Aug	33	Fall Kite Event	E-mail Coupon	Bellen	23.98
2020-05-24	May	22	None	Web Site Sales	Bellen	44.34
2020-09-10	Sep	37	None	In Store Sales	Aspen	21.09
2020-09-26	Sep	39	None	E-mail Coupon	Quad	33.71
2020-07-12	Jul	29	None	Web Site Sales	Bellen	23.99
2020-09-29	Sep	40	None	In Store Sales	Carlota	46.66
2020-05-17	May	21	None	Web Site Sales	Sunshine	322.34
2020-09-11	Sep	37	None	Web Site Sales	Bellen	46.25
2020-05-03	May	19	None	In Store Sales	Aspen	76.62
2020-07-25	Jul	30	None	In Store Sales	Quad	99.25
2020-09-17	Sep	38	None	E-mail Coupon	Carlota	44.92
2020-05-12	May	20	None	Web Site Sales	Sunshine	60.06
2020-09-08	Sep	37	None	In Store Sales	Crested Beaut	23.41
2020-07-15	Jul	29	None	In Store Sales	Doublers	80.06
2020-07-06	Jul	28	None	Web Site Sales	Sunshine	284.83
2020-09-02	Sep	36	None	Web Site Sales	Sunshine	57.34
2020-07-08	Jul	28	None	In Store Sales	Doublers	234.13
2020-06-12	Jun	24	Festival of Flight	E-mail Coupon	Crested Beaut	25.85
2020-05-09	May	19	None	Web Site Sales	Sunshine	20.56
2020-08-22	Aug	34	Fall Kite Event	E-mail Coupon	Crested Beaut	48.95
2020-07-28	Jul	31	None	In Store Sales	Bellen	23.31
2020-07-31	Jul	31	None	Web Site Sales	Sunshine	57.41
2020-09-20	Sep	39	None	In Store Sales	Quad	66.98
2020-08-28	Aug	35	Fall Kite Event	Web Site Sales	Doublers	228.46
2020-08-27	Aug	35	Fall Kite Event	In Store Sales	Majectic Beaut	90.56
2020-05-02	May	18	None	Web Site Sales	Bellen	23.8
2020-07-29	Jul	31	None	In Store Sales	Sunset	514.68
2020-07-03	Jul	27	None	Web Site Sales	Quad	64.8
2020-08-21	Aug	34	Fall Kite Event	Web Site Sales	Majectic Beaut	28.13
2020-05-28	May	22	None	In Store Sales	Bellen	69.22
2020-09-17	Sep	38	None	Web Site Sales	V-Rang	36.48
2020-09-13	Sep	38	None	E-mail Coupon	Sunshine	20.96
2020-09-10	Sep	37	None	In Store Sales	Majectic Beaut	58.88
2020-09-17	Sep	38	None	E-mail Coupon	Sunshine	160.43
2020-08-10	Aug	33	Fall Kite Event	In Store Sales	Crested Beaut	25.98
2020-09-15	Sep	38	None	Web Site Sales	Quad	99.98
2020-06-20	Jun	25	Festival of Flight	Web Site Sales	Bellen	46.43
2020-07-12	Jul	29	None	In Store Sales	Majectic Beaut	84.94
2020-08-15	Aug	33	Fall Kite Event	Web Site Sales	Bellen	115.62
2020-05-17	May	21	None	Web Site Sales	Sunbell	502.27
2020-07-27	Jul	31	None	E-mail Coupon	Aspen	40.02
2020-06-07	Jun	24	Festival of Flight	Web Site Sales	Bellen	230.14
2020-09-21	Sep	39	None	In Store Sales	Sunbell	72.38
2020-05-30	May	22	None	Web Site Sales	Sunbell	48.99
2020-07-11	Jul	28	None	Web Site Sales	Sunshine	20.76
2020-08-11	Aug	33	Fall Kite Event	E-mail Coupon	Doublers	240.06
2020-05-01	May	18	None	In Store Sales	V-Rang	38.48
2020-07-20	Jul	30	None	In Store Sales	Doublers	835.82
2020-05-20	May	21	None	In Store Sales	Majectic Beaut	87.36
2020-09-12	Sep	37	None	Web Site Sales	Sunshine	40.81
2020-05-22	May	21	None	In Store Sales	Sunshine	60.59
2020-07-13	Jul	29	None	In Store Sales	Aspen	40.68
2020-07-03	Jul	27	None	Web Site Sales	Carlota	305.94
2020-09-25	Sep	39	None	Web Site Sales	Sunshine	20.02
2020-07-09	Jul	28	None	In Store Sales	Quad	99.72
2020-08-19	Aug	34	Fall Kite Event	In Store Sales	Quad	34.61
2020-09-23	Sep	39	None	Web Site Sales	Bellen	69.51
2020-06-12	Jun	24	Festival of Flight	Web Site Sales	Sunshine	60.19
2020-05-02	May	18	None	Web Site Sales	Carlota	23.83
2020-07-13	Jul	29	None	In Store Sales	Sunset	47.92
2020-07-28	Jul	31	None	Web Site Sales	Aspen	43
2020-05-22	May	21	None	In Store Sales	Sunbell	48.21
2020-05-20	May	21	None	Web Site Sales	Crested Beaut	50
2020-05-09	May	19	None	In Store Sales	Quad	34.18
2020-08-08	Aug	32	Fall Kite Event	In Store Sales	Crested Beaut	437.31
2020-07-27	Jul	31	None	Web Site Sales	Carlota	46.88
2020-08-31	Aug	36	None	In Store Sales	Quad	66.06
2020-09-27	Sep	40	None	Web Site Sales	Aspen	76.69
2020-09-05	Sep	36	None	Web Site Sales	Bellen	69.82
2020-05-13	May	20	None	In Store Sales	Carlota	23.59
2020-07-02	Jul	27	None	Web Site Sales	Sunset	47.46
2020-05-07	May	19	None	Web Site Sales	Sunset	71.69
2020-09-14	Sep	38	None	Web Site Sales	Carlota	23.06
2020-07-25	Jul	30	None	E-mail Coupon	Majectic Beaut	29.59
2020-05-28	May	22	None	Web Site Sales	Quad	132.81
2020-06-23	Jun	26	Festival of Flight	Web Site Sales	Bellen	22.05
2020-05-23	May	21	None	Web Site Sales	Majectic Beaut	240.22
2020-07-12	Jul	29	None	Web Site Sales	Bellen	46.7
2020-09-15	Sep	38	None	In Store Sales	Sunbell	50.57
2020-07-21	Jul	30	None	In Store Sales	Quad	34
2020-05-27	May	22	None	In Store Sales	Sunbell	69.59
2020-06-17	Jun	25	Festival of Flight	Web Site Sales	Quad	66.79
2020-08-09	Aug	33	Fall Kite Event	In Store Sales	Sunbell	75.06
2020-09-15	Sep	38	None	In Store Sales	Sunset	491.22
2020-09-19	Sep	38	None	Web Site Sales	Sunshine	60.87
2020-07-15	Jul	29	None	In Store Sales	Quad	33.4
2020-08-18	Aug	34	Fall Kite Event	In Store Sales	Sunshine	20.89
2020-06-21	Jun	26	Festival of Flight	In Store Sales	Sunshine	40.18
2020-07-11	Jul	28	None	In Store Sales	Sunset	47.46
2020-05-26	May	22	None	Web Site Sales	Sunshine	80.66
2020-09-08	Sep	37	None	In Store Sales	Quad	102.72
2020-06-27	Jun	26	Festival of Flight	In Store Sales	Doublers	240.83
2020-09-21	Sep	39	None	In Store Sales	Aspen	60.3
2020-09-10	Sep	37	None	Web Site Sales	Quad	33.57
2020-06-14	Jun	25	Festival of Flight	In Store Sales	Crested Beaut	25.77
2020-08-10	Aug	33	Fall Kite Event	In Store Sales	Quad	99.44
2020-06-21	Jun	26	Festival of Flight	Web Site Sales	Aspen	63.34
2020-09-12	Sep	37	None	In Store Sales	Quad	66.94
2020-07-01	Jul	27	None	Web Site Sales	Carlota	22.64
2020-07-05	Jul	28	None	Web Site Sales	Majectic Beaut	87.38
2020-09-04	Sep	36	None	Web Site Sales	Quad	102.43
2020-05-13	May	20	None	E-mail Coupon	Bellen	66.51
2020-07-19	Jul	30	None	In Store Sales	Sunbell	69.45
2020-09-17	Sep	38	None	Web Site Sales	Sunbell	524.81
2020-07-15	Jul	29	None	In Store Sales	Bellen	46.16
2020-05-19	May	21	None	In Store Sales	FlatTop	106.2
2020-09-01	Sep	36	None	Web Site Sales	V-Rang	36.4
2020-08-30	Aug	36	None	Web Site Sales	Quad	96.64
2020-05-08	May	19	None	In Store Sales	Bellen	46.62
2020-09-22	Sep	39	None	In Store Sales	FlatTop	27.67
2020-07-11	Jul	28	None	E-mail Coupon	Sunshine	417.93
2020-05-04	May	19	None	Web Site Sales	Quad	752.78
2020-09-21	Sep	39	None	Web Site Sales	Crested Beaut	96.46
2020-05-26	May	22	None	Web Site Sales	Bellen	240.59
2020-05-21	May	21	None	Web Site Sales	V-Rang	36.96
2020-07-24	Jul	30	None	In Store Sales	Quad	68.39
2020-08-19	Aug	34	Fall Kite Event	Web Site Sales	Sunbell	48.74
2020-06-10	Jun	24	Festival of Flight	In Store Sales	FlatTop	28.24
2020-07-19	Jul	30	None	In Store Sales	Sunbell	72.17
2020-05-17	May	21	None	Web Site Sales	Sunbell	69.05
2020-06-05	Jun	23	Festival of Flight	E-mail Coupon	Crested Beaut	46.14
2020-05-20	May	21	None	In Store Sales	Carlota	46.27
2020-08-29	Aug	35	Fall Kite Event	E-mail Coupon	Bellen	138
2020-06-06	Jun	23	Festival of Flight	Web Site Sales	Aspen	57.66
2020-07-04	Jul	27	None	Web Site Sales	V-Rang	36.86
2020-07-26	Jul	31	None	In Store Sales	Majectic Beaut	60.83
2020-05-14	May	20	None	Web Site Sales	Bellen	88.62
2020-09-20	Sep	39	None	In Store Sales	FlatTop	80.28
2020-07-23	Jul	30	None	In Store Sales	Doublers	160.04
2020-09-06	Sep	37	None	In Store Sales	Sunshine	40.8
2020-05-03	May	19	None	In Store Sales	Sunshine	20.78
2020-07-13	Jul	29	None	Web Site Sales	Bellen	46.05
2020-06-24	Jun	26	Festival of Flight	Web Site Sales	V-Rang	36.22
2020-07-10	Jul	28	None	E-mail Coupon	Sunset	71.19
2020-08-12	Aug	33	Fall Kite Event	E-mail Coupon	Sunbell	96.89
2020-09-26	Sep	39	None	In Store Sales	Sunset	23.53
2020-09-03	Sep	36	None	In Store Sales	Sunbell	75.36
2020-06-02	Jun	23	Festival of Flight	In Store Sales	Sunbell	23.64
2020-06-01	Jun	23	Festival of Flight	Web Site Sales	Aspen	60.45
2020-07-31	Jul	31	None	In Store Sales	Sunbell	96.19
2020-05-30	May	22	None	Web Site Sales	Sunbell	48.53
2020-08-05	Aug	32	Fall Kite Event	In Store Sales	Quad	34.71
2020-05-30	May	22	None	In Store Sales	Bellen	23.88
2020-09-05	Sep	36	None	Web Site Sales	Majectic Beaut	58.52
2020-05-29	May	22	None	E-mail Coupon	Crested Beaut	69.96
2020-07-24	Jul	30	None	Web Site Sales	Quad	33.8
2020-08-09	Aug	33	Fall Kite Event	Web Site Sales	Crested Beaut	48.35
2020-09-19	Sep	38	None	In Store Sales	FlatTop	83
2020-08-08	Aug	32	Fall Kite Event	E-mail Coupon	V-Rang	54.35
2020-05-28	May	22	None	E-mail Coupon	Crested Beaut	48.61
2020-09-16	Sep	38	None	In Store Sales	Quad	132.64
2020-05-19	May	21	None	In Store Sales	Carlota	46.88
2020-06-29	Jun	27	None	In Store Sales	Bellen	46.66
2020-05-05	May	19	None	E-mail Coupon	Carlota	545.7
2020-06-18	Jun	25	Festival of Flight	Web Site Sales	FlatTop	28.19
2020-06-01	Jun	23	Festival of Flight	Web Site Sales	Sunshine	40.29
2020-08-06	Aug	32	Fall Kite Event	E-mail Coupon	Bellen	46.62
2020-05-03	May	19	None	Web Site Sales	Bellen	46.28
2020-06-28	Jun	27	None	Web Site Sales	Bellen	69.58
2020-06-20	Jun	25	Festival of Flight	Web Site Sales	Quad	627.63
2020-08-15	Aug	33	Fall Kite Event	In Store Sales	FlatTop	83.33
2020-08-17	Aug	34	Fall Kite Event	In Store Sales	Carlota	46.82
2020-06-29	Jun	27	None	Web Site Sales	V-Rang	38.65
2020-08-09	Aug	33	Fall Kite Event	E-mail Coupon	Sunshine	20.72
2020-06-15	Jun	25	Festival of Flight	In Store Sales	Quad	102.38
2020-08-11	Aug	33	Fall Kite Event	In Store Sales	Aspen	38.95
2020-06-16	Jun	25	Festival of Flight	E-mail Coupon	Sunshine	20.47
2020-08-08	Aug	32	Fall Kite Event	E-mail Coupon	Doublers	80.2
2020-06-30	Jun	27	None	Web Site Sales	Sunbell	24.61
2020-07-28	Jul	31	None	Web Site Sales	Quad	34
2020-08-09	Aug	33	Fall Kite Event	Web Site Sales	Sunset	257.96
2020-08-22	Aug	34	Fall Kite Event	In Store Sales	Sunbell	46.72
2020-06-24	Jun	26	Festival of Flight	In Store Sales	Sunbell	92.32
2020-06-29	Jun	27	None	Web Site Sales	Carlota	23.59
2020-08-27	Aug	35	Fall Kite Event	Web Site Sales	Carlota	46.53
2020-06-10	Jun	24	Festival of Flight	Web Site Sales	Quad	33.48
2020-07-14	Jul	29	None	Web Site Sales	Quad	66.91
2020-08-17	Aug	34	Fall Kite Event	E-mail Coupon	Majectic Beaut	28.88
2020-08-08	Aug	32	Fall Kite Event	E-mail Coupon	Sunshine	140.44
2020-06-11	Jun	24	Festival of Flight	Web Site Sales	Bellen	46.52
2020-05-25	May	22	None	In Store Sales	Quad	64.35
2020-06-11	Jun	24	Festival of Flight	Web Site Sales	Carlota	44.39
2020-06-19	Jun	25	Festival of Flight	Web Site Sales	Sunshine	40.24
2020-06-07	Jun	24	Festival of Flight	Web Site Sales	Carlota	46.48
2020-08-24	Aug	35	Fall Kite Event	Web Site Sales	Carlota	23.51
2020-06-12	Jun	24	Festival of Flight	In Store Sales	Sunset	24.16
2020-08-19	Aug	34	Fall Kite Event	Web Site Sales	Bellen	92.9
2020-08-08	Aug	32	Fall Kite Event	In Store Sales	Majectic Beaut	87.47
2020-08-24	Aug	35	Fall Kite Event	Web Site Sales	Bellen	69.98
2020-08-03	Aug	32	Fall Kite Event	Web Site Sales	Bellen	44.33
2020-08-31	Aug	36	None	In Store Sales	Quad	33.23
2020-08-16	Aug	34	Fall Kite Event	E-mail Coupon	Sunbell	72.45
2020-08-05	Aug	32	Fall Kite Event	Web Site Sales	FlatTop	27.59
2020-05-12	May	20	None	Web Site Sales	Sunshine	20.89
2020-06-19	Jun	25	Festival of Flight	Web Site Sales	Majectic Beaut	58.18
2020-06-11	Jun	24	Festival of Flight	Web Site Sales	Carlota	66.66
2020-06-17	Jun	25	Festival of Flight	Web Site Sales	Bellen	22.94
2020-06-15	Jun	25	Festival of Flight	E-mail Coupon	Quad	68.36
2020-08-15	Aug	33	Fall Kite Event	In Store Sales	Bellen	66.33
2020-06-16	Jun	25	Festival of Flight	Web Site Sales	Crested Beaut	50.75
2020-09-21	Sep	39	None	E-mail Coupon	Doublers	240.16
2020-06-27	Jun	26	Festival of Flight	Web Site Sales	Quad	68.36
2020-06-16	Jun	25	Festival of Flight	Web Site Sales	Doublers	80.54
2020-05-17	May	21	None	Web Site Sales	Carlota	480.07
2020-08-29	Aug	35	Fall Kite Event	Web Site Sales	Sunset	47.92
2020-09-25	Sep	39	None	Web Site Sales	Aspen	42.83
2020-05-10	May	20	None	In Store Sales	Aspen	63.41
2020-09-14	Sep	38	None	E-mail Coupon	Crested Beaut	50.04
2020-06-28	Jun	27	None	In Store Sales	Bellen	23.64
2020-08-04	Aug	32	Fall Kite Event	In Store Sales	Carlota	69.42
2020-08-06	Aug	32	Fall Kite Event	In Store Sales	Sunset	71.85
2020-08-05	Aug	32	Fall Kite Event	In Store Sales	Majectic Beaut	29.11
2020-06-28	Jun	27	None	Web Site Sales	Quad	730.52
2020-08-29	Aug	35	Fall Kite Event	In Store Sales	Majectic Beaut	28.97
2020-08-04	Aug	32	Fall Kite Event	In Store Sales	Crested Beaut	25.81
2020-06-28	Jun	27	None	In Store Sales	Bellen	46.21
2020-08-18	Aug	34	Fall Kite Event	In Store Sales	Carlota	22.56
2020-09-03	Sep	36	None	Web Site Sales	Sunset	47.7
2020-06-03	Jun	23	Festival of Flight	In Store Sales	Sunshine	60.03
2020-09-05	Sep	36	None	E-mail Coupon	Doublers	152.44
2020-08-17	Aug	34	Fall Kite Event	In Store Sales	FlatTop	83.66
2020-06-19	Jun	25	Festival of Flight	Web Site Sales	Bellen	69.75
2020-06-26	Jun	26	Festival of Flight	Web Site Sales	Majectic Beaut	58.01
2020-08-19	Aug	34	Fall Kite Event	In Store Sales	V-Rang	54.43
2020-06-16	Jun	25	Festival of Flight	Web Site Sales	Doublers	560.17
2020-06-18	Jun	25	Festival of Flight	Web Site Sales	Sunbell	50.24
2020-08-26	Aug	35	Fall Kite Event	Web Site Sales	Sunshine	60.84
2020-07-30	Jul	31	None	Web Site Sales	Bellen	46.18
2020-05-04	May	19	None	Web Site Sales	Quad	66.7
2020-06-07	Jun	24	Festival of Flight	In Store Sales	Crested Beaut	48.49
2020-06-16	Jun	25	Festival of Flight	In Store Sales	Crested Beaut	48.61
2020-08-06	Aug	32	Fall Kite Event	Web Site Sales	Carlota	46.2
2020-07-26	Jul	31	None	E-mail Coupon	Bellen	46.18
2020-06-09	Jun	24	Festival of Flight	In Store Sales	V-Rang	18.51
2020-06-23	Jun	26	Festival of Flight	In Store Sales	Sunshine	80.19
2020-06-07	Jun	24	Festival of Flight	Web Site Sales	Bellen	46.62
2020-05-28	May	22	None	E-mail Coupon	Quad	99.65
2020-06-06	Jun	23	Festival of Flight	Web Site Sales	Crested Beaut	72.4
2020-06-18	Jun	25	Festival of Flight	Web Site Sales	Sunshine	40.07
2020-08-10	Aug	33	Fall Kite Event	E-mail Coupon	Quad	33.15
2020-06-09	Jun	24	Festival of Flight	Web Site Sales	Sunshine	341.85
2020-06-10	Jun	24	Festival of Flight	Web Site Sales	Crested Beaut	25.99
2020-08-24	Aug	35	Fall Kite Event	Web Site Sales	Quad	102.05
2020-08-25	Aug	35	Fall Kite Event	In Store Sales	Aspen	38.32
2020-06-18	Jun	25	Festival of Flight	Web Site Sales	Aspen	38.05
2020-08-01	Aug	31	None	In Store Sales	Sunshine	60.4
2020-09-22	Sep	39	None	Web Site Sales	Quad	658.76
2020-08-22	Aug	34	Fall Kite Event	E-mail Coupon	Crested Beaut	69.87
2020-07-03	Jul	27	None	Web Site Sales	Crested Beaut	48.31
2020-08-25	Aug	35	Fall Kite Event	E-mail Coupon	Bellen	22.16
2020-06-21	Jun	26	Festival of Flight	Web Site Sales	Sunshine	40.51
2020-07-26	Jul	31	None	In Store Sales	Sunset	47.54
2020-08-16	Aug	34	Fall Kite Event	Web Site Sales	Doublers	228.22
2020-06-10	Jun	24	Festival of Flight	In Store Sales	Carlota	46.88
2020-06-22	Jun	26	Festival of Flight	In Store Sales	Carlota	46.62
2020-06-30	Jun	27	None	In Store Sales	Majectic Beaut	120.75
2020-08-17	Aug	34	Fall Kite Event	Web Site Sales	Crested Beaut	48.98
2020-06-04	Jun	23	Festival of Flight	Web Site Sales	Bellen	88.69
2020-08-09	Aug	33	Fall Kite Event	Web Site Sales	Majectic Beaut	60.87
2020-09-16	Sep	38	None	In Store Sales	FlatTop	83.02
2020-08-16	Aug	34	Fall Kite Event	Web Site Sales	Carlota	46.55
2020-08-24	Aug	35	Fall Kite Event	In Store Sales	Sunbell	25.85
2020-06-27	Jun	26	Festival of Flight	Web Site Sales	Crested Beaut	50.52
2020-09-12	Sep	37	None	Web Site Sales	Sunbell	46.22
2020-06-03	Jun	23	Festival of Flight	Web Site Sales	V-Rang	76.9
2020-06-27	Jun	26	Festival of Flight	In Store Sales	Carlota	69.39
2020-07-12	Jul	29	None	Web Site Sales	Quad	99.97
2020-08-27	Aug	35	Fall Kite Event	In Store Sales	Quad	33.41
2020-05-06	May	19	None	Web Site Sales	Crested Beaut	25.69
2020-08-26	Aug	35	Fall Kite Event	In Store Sales	Carlota	46.99
2020-06-09	Jun	24	Festival of Flight	Web Site Sales	Carlota	69.58
2020-09-12	Sep	37	None	Web Site Sales	Sunset	71.84
2020-06-19	Jun	25	Festival of Flight	Web Site Sales	Quad	64.54
2020-08-16	Aug	34	Fall Kite Event	In Store Sales	Aspen	40.4
2020-06-27	Jun	26	Festival of Flight	Web Site Sales	Majectic Beaut	87.19
2020-06-02	Jun	23	Festival of Flight	E-mail Coupon	Bellen	138.06
2020-06-08	Jun	24	Festival of Flight	Web Site Sales	Sunbell	46.49
2020-06-13	Jun	24	Festival of Flight	Web Site Sales	Majectic Beaut	523.74
2020-08-28	Aug	35	Fall Kite Event	Web Site Sales	Sunbell	72.96
2020-06-02	Jun	23	Festival of Flight	Web Site Sales	Carlota	92.47
2020-07-20	Jul	30	None	In Store Sales	Sunshine	60.43
2020-08-09	Aug	33	Fall Kite Event	In Store Sales	Quad	68.59
2020-06-27	Jun	26	Festival of Flight	In Store Sales	Quad	99.67
2020-08-23	Aug	35	Fall Kite Event	In Store Sales	Sunshine	60.42
2020-06-11	Jun	24	Festival of Flight	Web Site Sales	V-Rang	38.79
2020-05-28	May	22	None	In Store Sales	Quad	96.96
2020-08-09	Aug	33	Fall Kite Event	E-mail Coupon	Sunset	24.33
2020-06-01	Jun	23	Festival of Flight	Web Site Sales	Quad	99.83
2020-09-15	Sep	38	None	In Store Sales	Sunbell	46.16
2020-06-27	Jun	26	Festival of Flight	Web Site Sales	Sunshine	20.58
2020-05-19	May	21	None	Web Site Sales	Carlota	46.83
2020-08-30	Aug	36	None	In Store Sales	Quad	34.01
2020-07-24	Jul	30	None	Web Site Sales	Sunshine	38.77
2020-06-01	Jun	23	Festival of Flight	In Store Sales	Doublers	240.01
2020-07-05	Jul	28	None	Web Site Sales	Carlota	69.02
2020-08-22	Aug	34	Fall Kite Event	E-mail Coupon	Bellen	69.27
2020-08-29	Aug	35	Fall Kite Event	In Store Sales	Sunbell	48.69
2020-06-29	Jun	27	None	Web Site Sales	Bellen	46.82
2020-06-05	Jun	23	Festival of Flight	In Store Sales	Crested Beaut	48.67
2020-06-28	Jun	27	None	Web Site Sales	Bellen	23.27
2020-05-27	May	22	None	Web Site Sales	Carlota	46.34
2020-06-20	Jun	25	Festival of Flight	Web Site Sales	Majectic Beaut	58.48
2020-06-22	Jun	26	Festival of Flight	Web Site Sales	Carlota	69.2
2020-08-03	Aug	32	Fall Kite Event	In Store Sales	Aspen	60.72
2020-06-09	Jun	24	Festival of Flight	In Store Sales	Aspen	57.43
2020-06-07	Jun	24	Festival of Flight	Web Site Sales	Crested Beaut	24.24
2020-06-13	Jun	24	Festival of Flight	Web Site Sales	FlatTop	186.62
2020-06-21	Jun	26	Festival of Flight	In Store Sales	Quad	68.37
2020-08-02	Aug	32	Fall Kite Event	In Store Sales	Quad	34
2020-06-03	Jun	23	Festival of Flight	In Store Sales	Quad	32.36
2020-08-17	Aug	34	Fall Kite Event	In Store Sales	Sunbell	50.58
2020-06-27	Jun	26	Festival of Flight	Web Site Sales	Sunset	47.05
2020-06-24	Jun	26	Festival of Flight	In Store Sales	Bellen	44.27
2020-08-05	Aug	32	Fall Kite Event	In Store Sales	Carlota	46.29
2020-08-22	Aug	34	Fall Kite Event	Web Site Sales	Sunshine	57.74
2020-07-18	Jul	29	None	E-mail Coupon	Carlota	23.79
2020-09-04	Sep	36	None	Web Site Sales	Sunshine	180.32
2020-08-10	Aug	33	Fall Kite Event	In Store Sales	Carlota	46.6
2020-06-27	Jun	26	Festival of Flight	E-mail Coupon	Carlota	46.1
2020-08-06	Aug	32	Fall Kite Event	In Store Sales	Majectic Beaut	87.68
2020-06-15	Jun	25	Festival of Flight	Web Site Sales	Sunset	71.77
2020-06-16	Jun	25	Festival of Flight	In Store Sales	Quad	33.56
2020-08-22	Aug	34	Fall Kite Event	In Store Sales	Carlota	23.32
2020-09-01	Sep	36	None	Web Site Sales	FlatTop	601.94
2020-05-10	May	20	None	Web Site Sales	Sunset	47.03
2020-05-22	May	21	None	In Store Sales	Quad	68.08
2020-06-19	Jun	25	Festival of Flight	Web Site Sales	Bellen	46.84
2020-08-05	Aug	32	Fall Kite Event	In Store Sales	Bellen	46.09
2020-09-16	Sep	38	None	Web Site Sales	Carlota	23.83
2020-08-24	Aug	35	Fall Kite Event	In Store Sales	Aspen	20.62
2020-06-14	Jun	25	Festival of Flight	Web Site Sales	Bellen	44.56
2020-08-10	Aug	33	Fall Kite Event	In Store Sales	Bellen	23.19
2020-06-03	Jun	23	Festival of Flight	Web Site Sales	Quad	102.57
2020-05-30	May	22	None	In Store Sales	Doublers	240.23
2020-06-25	Jun	26	Festival of Flight	Web Site Sales	V-Rang	90.23
2020-06-29	Jun	27	None	Web Site Sales	Quad	160.67
2020-06-29	Jun	27	None	Web Site Sales	Carlota	66.97
2020-08-02	Aug	32	Fall Kite Event	In Store Sales	Bellen	44.78
2020-06-15	Jun	25	Festival of Flight	Web Site Sales	Bellen	66.76
2020-08-31	Aug	36	None	In Store Sales	V-Rang	57.57
2020-05-15	May	20	None	Web Site Sales	Quad	66.97
2020-06-15	Jun	25	Festival of Flight	Web Site Sales	Bellen	46.34
2020-06-18	Jun	25	Festival of Flight	E-mail Coupon	Carlota	23.29
2020-09-06	Sep	37	None	In Store Sales	Carlota	69.88
2020-08-14	Aug	33	Fall Kite Event	Web Site Sales	Majectic Beaut	90.6
2020-06-30	Jun	27	None	Web Site Sales	Quad	99.45
2020-08-09	Aug	33	Fall Kite Event	Web Site Sales	Sunbell	25.17
2020-07-30	Jul	31	None	Web Site Sales	Aspen	63.34
2020-06-07	Jun	24	Festival of Flight	In Store Sales	Carlota	327.91
2020-09-01	Sep	36	None	Web Site Sales	Sunset	24.88
2020-06-14	Jun	25	Festival of Flight	Web Site Sales	Sunshine	19.38
2020-06-22	Jun	26	Festival of Flight	Web Site Sales	Quad	68.08
2020-08-18	Aug	34	Fall Kite Event	Web Site Sales	Bellen	69.07
2020-08-06	Aug	32	Fall Kite Event	In Store Sales	Aspen	40.74
2020-08-06	Aug	32	Fall Kite Event	Web Site Sales	Crested Beaut	24.62
2020-06-24	Jun	26	Festival of Flight	In Store Sales	Quad	66.91
2020-06-05	Jun	23	Festival of Flight	Web Site Sales	Sunset	24.76
2020-08-17	Aug	34	Fall Kite Event	In Store Sales	Quad	102.34
2020-06-12	Jun	24	Festival of Flight	Web Site Sales	Aspen	80.86
2020-06-30	Jun	27	None	E-mail Coupon	Carlota	23.85
2020-06-22	Jun	26	Festival of Flight	Web Site Sales	Carlota	22.97
2020-06-26	Jun	26	Festival of Flight	In Store Sales	Crested Beaut	46.75
2020-06-28	Jun	27	None	Web Site Sales	Carlota	44.82
2020-08-26	Aug	35	Fall Kite Event	In Store Sales	Quad	99.42
2020-08-25	Aug	35	Fall Kite Event	Web Site Sales	Sunshine	38.57
2020-06-08	Jun	24	Festival of Flight	Web Site Sales	Carlota	176.27
2020-06-20	Jun	25	Festival of Flight	Web Site Sales	Quad	192.39
2020-06-29	Jun	27	None	Web Site Sales	Doublers	152.17
2020-08-05	Aug	32	Fall Kite Event	E-mail Coupon	Carlota	46.58
2020-06-16	Jun	25	Festival of Flight	Web Site Sales	Quad	96.55
2020-08-17	Aug	34	Fall Kite Event	In Store Sales	Quad	32.13
2020-08-30	Aug	36	None	In Store Sales	Bellen	46.88
2020-08-06	Aug	32	Fall Kite Event	Web Site Sales	Majectic Beaut	90.03
2020-05-11	May	20	None	Web Site Sales	Sunbell	46.21
2020-06-26	Jun	26	Festival of Flight	Web Site Sales	Carlota	22.27
2020-08-14	Aug	33	Fall Kite Event	In Store Sales	V-Rang	57.56
2020-06-02	Jun	23	Festival of Flight	In Store Sales	Bellen	46.08
2020-07-02	Jul	27	None	Web Site Sales	Crested Beaut	50.71
2020-08-12	Aug	33	Fall Kite Event	Web Site Sales	Sunshine	40.45
2020-08-28	Aug	35	Fall Kite Event	In Store Sales	Majectic Beaut	90.57
2020-06-07	Jun	24	Festival of Flight	In Store Sales	V-Rang	57.35
2020-09-21	Sep	39	None	Web Site Sales	Aspen	63.82
2020-06-15	Jun	25	Festival of Flight	In Store Sales	Carlota	46.08
2020-08-17	Aug	34	Fall Kite Event	In Store Sales	Bellen	69.13
2020-05-18	May	21	None	Web Site Sales	Sunbell	547.46
2020-06-12	Jun	24	Festival of Flight	Web Site Sales	Sunset	45.16
2020-06-24	Jun	26	Festival of Flight	Web Site Sales	Sunshine	19.62
2020-08-26	Aug	35	Fall Kite Event	In Store Sales	Quad	64.91
2020-08-29	Aug	35	Fall Kite Event	Web Site Sales	Aspen	63.3
2020-07-15	Jul	29	None	In Store Sales	Quad	99.77
2020-08-01	Aug	31	None	Web Site Sales	Bellen	92.23
2020-08-14	Aug	33	Fall Kite Event	In Store Sales	Sunset	23.41
2020-09-25	Sep	39	None	In Store Sales	Aspen	40.07
2020-06-03	Jun	23	Festival of Flight	Web Site Sales	FlatTop	554.95
2020-08-06	Aug	32	Fall Kite Event	In Store Sales	Sunshine	60.7
2020-08-11	Aug	33	Fall Kite Event	In Store Sales	Bellen	23.65
2020-08-23	Aug	35	Fall Kite Event	Web Site Sales	Quad	34.78
2020-06-18	Jun	25	Festival of Flight	Web Site Sales	Doublers	156.2
2020-08-27	Aug	35	Fall Kite Event	Web Site Sales	Sunbell	50.2
2020-05-13	May	20	None	Web Site Sales	Bellen	46.71
2020-08-06	Aug	32	Fall Kite Event	Web Site Sales	Crested Beaut	48.69
2020-08-11	Aug	33	Fall Kite Event	E-mail Coupon	Aspen	20.83
2020-08-16	Aug	34	Fall Kite Event	In Store Sales	Aspen	57.28
2020-08-02	Aug	32	Fall Kite Event	In Store Sales	Quad	64.44
2020-06-05	Jun	23	Festival of Flight	Web Site Sales	Sunbell	72.9
2020-06-19	Jun	25	Festival of Flight	Web Site Sales	Majectic Beaut	29.45
2020-06-10	Jun	24	Festival of Flight	In Store Sales	Bellen	23.82
2020-08-02	Aug	32	Fall Kite Event	E-mail Coupon	V-Rang	76
2020-07-21	Jul	30	None	Web Site Sales	Bellen	69.72
2020-06-18	Jun	25	Festival of Flight	In Store Sales	Carlota	66.48
2020-09-12	Sep	37	None	In Store Sales	Sunbell	75.49
2020-08-01	Aug	31	None	In Store Sales	Carlota	46.56
2020-06-14	Jun	25	Festival of Flight	In Store Sales	Sunshine	20.87
2020-06-21	Jun	26	Festival of Flight	In Store Sales	FlatTop	55.48
2020-06-26	Jun	26	Festival of Flight	Web Site Sales	Sunbell	50.71
2020-07-15	Jul	29	None	In Store Sales	Quad	66.1
2020-05-13	May	20	None	In Store Sales	Bellen	46.73
2020-06-27	Jun	26	Festival of Flight	E-mail Coupon	Sunshine	100.66
2020-06-09	Jun	24	Festival of Flight	Web Site Sales	Majectic Beaut	60.89
2020-08-29	Aug	35	Fall Kite Event	In Store Sales	Bellen	69.16
2020-08-25	Aug	35	Fall Kite Event	Web Site Sales	Quad	64.55
2020-06-15	Jun	25	Festival of Flight	E-mail Coupon	Majectic Beaut	84.47
2020-06-04	Jun	23	Festival of Flight	Web Site Sales	Bellen	23.48
2020-06-04	Jun	23	Festival of Flight	E-mail Coupon	Majectic Beaut	60.73
2020-06-15	Jun	25	Festival of Flight	In Store Sales	Carlota	23.28
2020-06-02	Jun	23	Festival of Flight	Web Site Sales	Sunbell	50.41
2020-07-23	Jul	30	None	Web Site Sales	Sunbell	75.61
2020-07-29	Jul	31	None	In Store Sales	Crested Beaut	296.78
2020-08-16	Aug	34	Fall Kite Event	In Store Sales	Aspen	38.83
2020-08-21	Aug	34	Fall Kite Event	In Store Sales	Bellen	46.42
2020-08-25	Aug	35	Fall Kite Event	Web Site Sales	Sunshine	38.39
2020-05-23	May	21	None	Web Site Sales	Carlota	22.38
2020-07-14	Jul	29	None	E-mail Coupon	V-Rang	38.24
2020-08-07	Aug	32	Fall Kite Event	In Store Sales	Sunbell	48.37
2020-08-01	Aug	31	None	E-mail Coupon	Bellen	23.02
2020-06-10	Jun	24	Festival of Flight	In Store Sales	Sunset	45.6
2020-08-29	Aug	35	Fall Kite Event	In Store Sales	Aspen	19.42
2020-08-24	Aug	35	Fall Kite Event	In Store Sales	Doublers	76.98
2020-06-07	Jun	24	Festival of Flight	Web Site Sales	Sunshine	20.87
2020-07-28	Jul	31	None	In Store Sales	V-Rang	57.85
2020-08-19	Aug	34	Fall Kite Event	Web Site Sales	Aspen	19.46
2020-08-19	Aug	34	Fall Kite Event	In Store Sales	Quad	64.65
2020-06-23	Jun	26	Festival of Flight	Web Site Sales	Aspen	38.6
2020-06-16	Jun	25	Festival of Flight	Web Site Sales	V-Rang	18.66
2020-08-10	Aug	33	Fall Kite Event	Web Site Sales	Majectic Beaut	29.45
2020-06-15	Jun	25	Festival of Flight	Web Site Sales	Sunshine	432.85
2020-08-27	Aug	35	Fall Kite Event	Web Site Sales	Majectic Beaut	58.93
2020-08-04	Aug	32	Fall Kite Event	In Store Sales	Sunshine	60.07
2020-05-18	May	21	None	Web Site Sales	Sunbell	50.23
2020-08-14	Aug	33	Fall Kite Event	In Store Sales	Bellen	46.11
2020-08-27	Aug	35	Fall Kite Event	In Store Sales	Bellen	44.16
2020-06-28	Jun	27	None	Web Site Sales	Majectic Beaut	87.83
2020-06-19	Jun	25	Festival of Flight	In Store Sales	Carlota	23.57
2020-05-10	May	20	None	E-mail Coupon	Aspen	60.88
2020-06-05	Jun	23	Festival of Flight	Web Site Sales	Doublers	80.74
2020-09-05	Sep	36	None	Web Site Sales	Quad	99.44
2020-06-08	Jun	24	Festival of Flight	In Store Sales	V-Rang	308.87
2020-08-16	Aug	34	Fall Kite Event	In Store Sales	Sunshine	38.86
2020-06-14	Jun	25	Festival of Flight	E-mail Coupon	Aspen	38.48
2020-09-11	Sep	37	None	Web Site Sales	V-Rang	36.89
2020-06-22	Jun	26	Festival of Flight	Web Site Sales	Bellen	46.16
2020-08-16	Aug	34	Fall Kite Event	In Store Sales	Aspen	40.26
2020-06-27	Jun	26	Festival of Flight	Web Site Sales	Carlota	46.88
2020-06-18	Jun	25	Festival of Flight	Web Site Sales	Quad	66.07
2020-08-17	Aug	34	Fall Kite Event	In Store Sales	Majectic Beaut	90.57
2020-09-11	Sep	37	None	Web Site Sales	Sunshine	40.54
2020-08-09	Aug	33	Fall Kite Event	In Store Sales	Sunbell	50.42
2020-08-21	Aug	34	Fall Kite Event	E-mail Coupon	Sunset	47.13
2020-06-03	Jun	23	Festival of Flight	In Store Sales	Sunshine	60.84
2020-08-17	Aug	34	Fall Kite Event	In Store Sales	Carlota	46.98
2020-07-25	Jul	30	None	Web Site Sales	V-Rang	36.95
2020-09-16	Sep	38	None	In Store Sales	Sunset	90.97
2020-06-12	Jun	24	Festival of Flight	Web Site Sales	Majectic Beaut	30.27
2020-06-01	Jun	23	Festival of Flight	In Store Sales	Carlota	46.27
2020-06-30	Jun	27	None	Web Site Sales	Sunset	68.64
2020-06-16	Jun	25	Festival of Flight	Web Site Sales	Sunbell	48.22
2020-08-18	Aug	34	Fall Kite Event	In Store Sales	Sunset	165.2
2020-08-25	Aug	35	Fall Kite Event	In Store Sales	Carlota	46.94
2020-08-14	Aug	33	Fall Kite Event	Web Site Sales	Quad	68.54
2020-08-11	Aug	33	Fall Kite Event	In Store Sales	Bellen	69.54
2020-06-22	Jun	26	Festival of Flight	Web Site Sales	Carlota	69.92
2020-08-10	Aug	33	Fall Kite Event	In Store Sales	Quad	33.42
2020-05-22	May	21	None	E-mail Coupon	Carlota	46.14
2020-08-04	Aug	32	Fall Kite Event	In Store Sales	Sunbell	96.73
2020-08-31	Aug	36	None	In Store Sales	Bellen	46.17
2020-08-01	Aug	31	None	In Store Sales	Sunbell	75.77
2020-07-22	Jul	30	None	In Store Sales	Bellen	92.92
2020-06-24	Jun	26	Festival of Flight	Web Site Sales	Quad	68.72
2020-06-11	Jun	24	Festival of Flight	Web Site Sales	Quad	64.29
2020-06-10	Jun	24	Festival of Flight	Web Site Sales	Quad	99.52
2020-06-08	Jun	24	Festival of Flight	Web Site Sales	Aspen	20.12
2020-08-29	Aug	35	Fall Kite Event	In Store Sales	Majectic Beaut	58.7
2020-05-06	May	19	None	E-mail Coupon	Sunshine	20.52
2020-07-06	Jul	28	None	In Store Sales	Carlota	23.28
2020-09-15	Sep	38	None	Web Site Sales	Sunset	514.06
2020-06-12	Jun	24	Festival of Flight	In Store Sales	Carlota	46.94
2020-05-17	May	21	None	Web Site Sales	Sunbell	46.85
2020-08-11	Aug	33	Fall Kite Event	In Store Sales	Sunshine	60.62
2020-06-19	Jun	25	Festival of Flight	Web Site Sales	Bellen	46.1
2020-06-10	Jun	24	Festival of Flight	Web Site Sales	Majectic Beaut	570.93
2020-05-08	May	19	None	Web Site Sales	Aspen	42.72
2020-06-21	Jun	26	Festival of Flight	Web Site Sales	Sunset	71.13
2020-08-19	Aug	34	Fall Kite Event	Web Site Sales	Sunshine	40.65
2020-06-27	Jun	26	Festival of Flight	Web Site Sales	Sunshine	40.8
2020-05-11	May	20	None	E-mail Coupon	Quad	68.13
2020-06-03	Jun	23	Festival of Flight	Web Site Sales	Carlota	23.26
2020-09-10	Sep	37	None	Web Site Sales	Aspen	38.98
2020-07-26	Jul	31	None	Web Site Sales	Sunbell	48.75
2020-09-25	Sep	39	None	In Store Sales	Crested Beaut	72.06
2020-08-16	Aug	34	Fall Kite Event	In Store Sales	Quad	132.27
2020-06-26	Jun	26	Festival of Flight	In Store Sales	Doublers	240.39
2020-06-07	Jun	24	Festival of Flight	Web Site Sales	Crested Beaut	25.49
2020-09-14	Sep	38	None	In Store Sales	Carlota	23.91
2020-08-04	Aug	32	Fall Kite Event	E-mail Coupon	Crested Beaut	48.98
2020-09-03	Sep	36	None	Web Site Sales	Doublers	240.17
2020-06-23	Jun	26	Festival of Flight	Web Site Sales	Bellen	414.74
2020-08-14	Aug	33	Fall Kite Event	Web Site Sales	Sunbell	23.45
2020-08-27	Aug	35	Fall Kite Event	E-mail Coupon	Carlota	305.39
2020-06-15	Jun	25	Festival of Flight	Web Site Sales	Sunshine	455.46
2020-09-19	Sep	38	None	Web Site Sales	Carlota	23.64
2020-06-21	Jun	26	Festival of Flight	In Store Sales	Quad	99.08
2020-05-13	May	20	None	In Store Sales	FlatTop	28.35
2020-08-30	Aug	36	None	In Store Sales	Doublers	835.55
2020-06-07	Jun	24	Festival of Flight	Web Site Sales	Sunshine	40.84
2020-08-27	Aug	35	Fall Kite Event	Web Site Sales	Carlota	23.67
2020-07-12	Jul	29	None	In Store Sales	Quad	64.73
2020-09-25	Sep	39	None	Web Site Sales	Carlota	23.51
2020-08-22	Aug	34	Fall Kite Event	In Store Sales	Quad	272.22
2020-06-30	Jun	27	None	In Store Sales	Sunbell	24.18
2020-08-13	Aug	33	Fall Kite Event	In Store Sales	Doublers	240.19
2020-06-16	Jun	25	Festival of Flight	In Store Sales	FlatTop	470.98
2020-08-02	Aug	32	Fall Kite Event	In Store Sales	Sunshine	20.78
2020-06-19	Jun	25	Festival of Flight	In Store Sales	Aspen	259.74
2020-08-11	Aug	33	Fall Kite Event	In Store Sales	Sunset	71.05
2020-08-07	Aug	32	Fall Kite Event	Web Site Sales	Carlota	46.3
2020-08-31	Aug	36	None	In Store Sales	Aspen	42.04
2020-05-20	May	21	None	Web Site Sales	Sunbell	50.98
2020-09-18	Sep	38	None	Web Site Sales	Quad	96.43
2020-06-24	Jun	26	Festival of Flight	E-mail Coupon	Sunshine	20.38
2020-06-12	Jun	24	Festival of Flight	In Store Sales	Bellen	46.69
2020-08-11	Aug	33	Fall Kite Event	Web Site Sales	Quad	486.68
2020-09-29	Sep	40	None	Web Site Sales	Carlota	69.25
2020-07-21	Jul	30	None	Web Site Sales	Quad	99.01
2020-08-27	Aug	35	Fall Kite Event	In Store Sales	Carlota	23.16
2020-06-17	Jun	25	Festival of Flight	E-mail Coupon	Majectic Beaut	58.53
2020-06-13	Jun	24	Festival of Flight	Web Site Sales	Sunshine	20.12
2020-06-18	Jun	25	Festival of Flight	In Store Sales	Bellen	161.48
2020-08-28	Aug	35	Fall Kite Event	In Store Sales	V-Rang	36.75
2020-06-12	Jun	24	Festival of Flight	E-mail Coupon	Carlota	46.04
2020-09-26	Sep	39	None	Web Site Sales	Carlota	23.47
2020-06-08	Jun	24	Festival of Flight	Web Site Sales	Sunshine	436.31
2020-06-06	Jun	23	Festival of Flight	Web Site Sales	Doublers	152.8
2020-08-23	Aug	35	Fall Kite Event	Web Site Sales	Crested Beaut	46.13
2020-08-06	Aug	32	Fall Kite Event	E-mail Coupon	Sunset	45.07
2020-09-29	Sep	40	None	Web Site Sales	V-Rang	19.73
2020-08-21	Aug	34	Fall Kite Event	In Store Sales	Carlota	240.64
2020-06-06	Jun	23	Festival of Flight	Web Site Sales	Majectic Beaut	441.09
2020-06-27	Jun	26	Festival of Flight	Web Site Sales	Quad	99.37
2020-08-04	Aug	32	Fall Kite Event	E-mail Coupon	Bellen	69.28
2020-06-28	Jun	27	None	Web Site Sales	Bellen	46.88
2020-06-20	Jun	25	Festival of Flight	Web Site Sales	Quad	99.28
2020-06-18	Jun	25	Festival of Flight	Web Site Sales	Sunset	23.9
2020-08-26	Aug	35	Fall Kite Event	Web Site Sales	Sunbell	92.43
2020-09-11	Sep	37	None	Web Site Sales	Sunshine	40.94
2020-06-12	Jun	24	Festival of Flight	Web Site Sales	Quad	96.81
2020-06-06	Jun	23	Festival of Flight	In Store Sales	Bellen	69.36
2020-08-29	Aug	35	Fall Kite Event	Web Site Sales	Sunshine	40.51
2020-05-23	May	21	None	In Store Sales	Quad	160.6
2020-08-03	Aug	32	Fall Kite Event	Web Site Sales	FlatTop	55.36
2020-08-09	Aug	33	Fall Kite Event	In Store Sales	Majectic Beaut	87.79
2020-06-12	Jun	24	Festival of Flight	Web Site Sales	Sunshine	38.77
2020-08-12	Aug	33	Fall Kite Event	In Store Sales	Sunset	45.98
2020-08-23	Aug	35	Fall Kite Event	In Store Sales	Sunbell	48.35
2020-09-01	Sep	36	None	In Store Sales	FlatTop	110.05
2020-06-26	Jun	26	Festival of Flight	Web Site Sales	Carlota	371.34
2020-06-16	Jun	25	Festival of Flight	Web Site Sales	Bellen	46.18
2020-09-20	Sep	39	None	Web Site Sales	Carlota	23.36
2020-05-10	May	20	None	Web Site Sales	Sunbell	25.16
2020-06-19	Jun	25	Festival of Flight	Web Site Sales	Bellen	69.37
2020-06-10	Jun	24	Festival of Flight	Web Site Sales	Carlota	523.21
2020-08-23	Aug	35	Fall Kite Event	Web Site Sales	Carlota	46.6
2020-08-26	Aug	35	Fall Kite Event	In Store Sales	Sunshine	38.11
2020-06-11	Jun	24	Festival of Flight	In Store Sales	Carlota	23.76
2020-09-26	Sep	39	None	Web Site Sales	Quad	198.15
2020-07-17	Jul	29	None	E-mail Coupon	Carlota	46.48
2020-07-13	Jul	29	None	Web Site Sales	Sunbell	388.15
2020-06-29	Jun	27	None	In Store Sales	Quad	549.99
2020-08-08	Aug	32	Fall Kite Event	In Store Sales	Sunset	24.19
2020-08-07	Aug	32	Fall Kite Event	In Store Sales	Bellen	23.37
2020-08-26	Aug	35	Fall Kite Event	In Store Sales	Carlota	46.13
2020-08-03	Aug	32	Fall Kite Event	E-mail Coupon	Sunshine	40.33
2020-08-03	Aug	32	Fall Kite Event	In Store Sales	Sunbell	72.47
2020-06-23	Jun	26	Festival of Flight	In Store Sales	Sunshine	40.3
2020-08-03	Aug	32	Fall Kite Event	In Store Sales	Quad	99.78
2020-08-03	Aug	32	Fall Kite Event	Web Site Sales	Sunset	24.62
2020-08-07	Aug	32	Fall Kite Event	In Store Sales	Quad	96.01
2020-05-31	May	23	Festival of Flight	Web Site Sales	Sunbell	48.77
2020-06-01	Jun	23	Festival of Flight	Web Site Sales	Majectic Beaut	90.47
2020-06-13	Jun	24	Festival of Flight	In Store Sales	Quad	165.62
2020-08-14	Aug	33	Fall Kite Event	In Store Sales	Sunshine	38.37
2020-06-24	Jun	26	Festival of Flight	In Store Sales	Sunshine	20.84
2020-06-02	Jun	23	Festival of Flight	Web Site Sales	Carlota	110.85
2020-09-17	Sep	38	None	Web Site Sales	Carlota	69.32
2020-06-24	Jun	26	Festival of Flight	E-mail Coupon	Sunset	71.7
2020-08-22	Aug	34	Fall Kite Event	E-mail Coupon	Quad	68.46
2020-06-20	Jun	25	Festival of Flight	Web Site Sales	Carlota	23.11
2020-06-12	Jun	24	Festival of Flight	Web Site Sales	Sunshine	417.42
2020-08-15	Aug	33	Fall Kite Event	In Store Sales	Sunshine	20.8
2020-06-14	Jun	25	Festival of Flight	Web Site Sales	Quad	297.15
2020-06-09	Jun	24	Festival of Flight	E-mail Coupon	Aspen	42.23
2020-08-21	Aug	34	Fall Kite Event	Web Site Sales	Sunbell	50.1
2020-06-18	Jun	25	Festival of Flight	In Store Sales	Quad	34.63
2020-08-15	Aug	33	Fall Kite Event	Web Site Sales	Quad	66.89
2020-06-02	Jun	23	Festival of Flight	E-mail Coupon	FlatTop	55.49
2020-08-22	Aug	34	Fall Kite Event	Web Site Sales	Bellen	69.77
2020-06-26	Jun	26	Festival of Flight	In Store Sales	Quad	34.45
2020-07-01	Jul	27	None	Web Site Sales	Sunset	24.59
2020-09-02	Sep	36	None	In Store Sales	Doublers	160.03
2020-05-22	May	21	None	Web Site Sales	V-Rang	54.49
2020-06-18	Jun	25	Festival of Flight	Web Site Sales	Quad	66.36
2020-08-28	Aug	35	Fall Kite Event	Web Site Sales	Crested Beaut	75.16
2020-08-29	Aug	35	Fall Kite Event	In Store Sales	Sunshine	38.64
2020-08-29	Aug	35	Fall Kite Event	In Store Sales	Quad	64.87
2020-06-07	Jun	24	Festival of Flight	Web Site Sales	Bellen	46.19
2020-05-30	May	22	None	E-mail Coupon	Bellen	23.77
2020-06-04	Jun	23	Festival of Flight	In Store Sales	Sunset	47.59
2020-06-12	Jun	24	Festival of Flight	Web Site Sales	Sunshine	20.73
2020-08-15	Aug	33	Fall Kite Event	In Store Sales	Bellen	46.73
2020-08-03	Aug	32	Fall Kite Event	Web Site Sales	Aspen	76.31
2020-06-10	Jun	24	Festival of Flight	Web Site Sales	Bellen	69.46
2020-07-23	Jul	30	None	In Store Sales	Sunbell	75.3
2020-08-02	Aug	32	Fall Kite Event	In Store Sales	Aspen	80.41
2020-08-31	Aug	36	None	Web Site Sales	FlatTop	55.04
2020-08-10	Aug	33	Fall Kite Event	In Store Sales	Sunshine	20.34
2020-09-30	Sep	40	None	Web Site Sales	Sunbell	23.73
2020-08-17	Aug	34	Fall Kite Event	In Store Sales	Quad	596.19
2020-06-07	Jun	24	Festival of Flight	E-mail Coupon	Sunset	94.91
2020-08-17	Aug	34	Fall Kite Event	In Store Sales	Bellen	23.64
2020-06-01	Jun	23	Festival of Flight	Web Site Sales	Sunbell	69.81
2020-05-31	May	23	Festival of Flight	Web Site Sales	Quad	34.78
2020-08-21	Aug	34	Fall Kite Event	E-mail Coupon	Quad	66.09
2020-08-24	Aug	35	Fall Kite Event	E-mail Coupon	Bellen	414.52
2020-06-18	Jun	25	Festival of Flight	In Store Sales	Quad	34.2
2020-08-15	Aug	33	Fall Kite Event	In Store Sales	Quad	68.84
2020-05-09	May	19	None	E-mail Coupon	Crested Beaut	25.81
2020-06-30	Jun	27	None	In Store Sales	Sunbell	48.34
2020-08-15	Aug	33	Fall Kite Event	Web Site Sales	Bellen	46.23
2020-08-29	Aug	35	Fall Kite Event	E-mail Coupon	Bellen	69.28
2020-08-02	Aug	32	Fall Kite Event	In Store Sales	Crested Beaut	50.36
2020-08-06	Aug	32	Fall Kite Event	In Store Sales	Quad	33.58
2020-08-25	Aug	35	Fall Kite Event	In Store Sales	Bellen	230.45
2020-08-14	Aug	33	Fall Kite Event	E-mail Coupon	Carlota	23.5
2020-06-24	Jun	26	Festival of Flight	Web Site Sales	Crested Beaut	50.77
2020-06-27	Jun	26	Festival of Flight	Web Site Sales	Doublers	240.11
2020-06-02	Jun	23	Festival of Flight	Web Site Sales	Quad	99.47
2020-06-18	Jun	25	Festival of Flight	Web Site Sales	Sunset	47.94
2020-06-03	Jun	23	Festival of Flight	In Store Sales	Quad	99.69
2020-07-01	Jul	27	None	Web Site Sales	Quad	102.69
2020-08-19	Aug	34	Fall Kite Event	Web Site Sales	Sunset	94.99
2020-06-21	Jun	26	Festival of Flight	Web Site Sales	Sunbell	25.38
2020-06-07	Jun	24	Festival of Flight	Web Site Sales	Sunbell	48.84
2020-08-09	Aug	33	Fall Kite Event	In Store Sales	Crested Beaut	523.94
2020-08-06	Aug	32	Fall Kite Event	In Store Sales	Bellen	69.95
2020-06-11	Jun	24	Festival of Flight	In Store Sales	Aspen	40.26
2020-08-06	Aug	32	Fall Kite Event	Web Site Sales	Sunbell	72.5
2020-08-23	Aug	35	Fall Kite Event	In Store Sales	Aspen	38.69
2020-08-16	Aug	34	Fall Kite Event	Web Site Sales	Sunbell	546.23
2020-06-19	Jun	25	Festival of Flight	Web Site Sales	Crested Beaut	48.23
2020-08-23	Aug	35	Fall Kite Event	In Store Sales	Majectic Beaut	87.14
2020-08-15	Aug	33	Fall Kite Event	In Store Sales	FlatTop	302.06
2020-06-14	Jun	25	Festival of Flight	Web Site Sales	Doublers	160.25
2020-07-02	Jul	27	None	E-mail Coupon	Majectic Beaut	232.87
2020-08-24	Aug	35	Fall Kite Event	In Store Sales	Majectic Beaut	60.94
2020-09-14	Sep	38	None	Web Site Sales	Sunbell	75.8
2020-08-13	Aug	33	Fall Kite Event	Web Site Sales	Sunshine	20.4
2020-09-13	Sep	38	None	Web Site Sales	Sunbell	46.13
2020-09-26	Sep	39	None	Web Site Sales	Sunbell	48.27
2020-05-29	May	22	None	In Store Sales	Bellen	23.46
2020-08-05	Aug	32	Fall Kite Event	Web Site Sales	Majectic Beaut	90.55
2020-08-14	Aug	33	Fall Kite Event	In Store Sales	Crested Beaut	48.05
2020-05-17	May	21	None	Web Site Sales	FlatTop	55.1
2020-05-14	May	20	None	In Store Sales	Sunset	47.12
2020-08-14	Aug	33	Fall Kite Event	E-mail Coupon	Quad	99.9
2020-05-23	May	21	None	Web Site Sales	Crested Beaut	75.97
2020-06-02	Jun	23	Festival of Flight	Web Site Sales	Sunshine	40.72
2020-06-28	Jun	27	None	E-mail Coupon	Crested Beaut	75.04
2020-08-01	Aug	31	None	Web Site Sales	Sunshine	60.66
2020-08-29	Aug	35	Fall Kite Event	In Store Sales	Majectic Beaut	29.51
2020-08-11	Aug	33	Fall Kite Event	Web Site Sales	Carlota	46.06
2020-08-22	Aug	34	Fall Kite Event	In Store Sales	Carlota	46.43
2020-08-10	Aug	33	Fall Kite Event	E-mail Coupon	Crested Beaut	72.44
2020-09-27	Sep	40	None	In Store Sales	Sunbell	75.82
2020-09-21	Sep	39	None	Web Site Sales	Bellen	66.27
2020-08-10	Aug	33	Fall Kite Event	In Store Sales	Sunshine	60.15
2020-08-08	Aug	32	Fall Kite Event	Web Site Sales	Majectic Beaut	58.94
2020-08-17	Aug	34	Fall Kite Event	In Store Sales	Sunbell	69.37
2020-06-17	Jun	25	Festival of Flight	Web Site Sales	V-Rang	18.68
2020-06-13	Jun	24	Festival of Flight	E-mail Coupon	Crested Beaut	75.25
2020-08-10	Aug	33	Fall Kite Event	Web Site Sales	Quad	34.36
2020-09-29	Sep	40	None	Web Site Sales	Quad	99.52
2020-09-30	Sep	40	None	Web Site Sales	Sunbell	24.75
2020-05-29	May	22	None	Web Site Sales	Sunbell	69.84
2020-08-23	Aug	35	Fall Kite Event	Web Site Sales	Majectic Beaut	90.94
2020-06-02	Jun	23	Festival of Flight	E-mail Coupon	Sunshine	20.95
2020-05-22	May	21	None	Web Site Sales	Sunshine	20.68
2020-06-14	Jun	25	Festival of Flight	In Store Sales	Sunset	68.73
2020-08-31	Aug	36	None	Web Site Sales	Sunbell	456.63
2020-08-21	Aug	34	Fall Kite Event	In Store Sales	Quad	102.35
2020-08-08	Aug	32	Fall Kite Event	In Store Sales	Sunbell	23.82
2020-06-05	Jun	23	Festival of Flight	Web Site Sales	Quad	66.35
2020-09-22	Sep	39	None	Web Site Sales	Quad	68.31
2020-08-09	Aug	33	Fall Kite Event	In Store Sales	Sunbell	75.11
2020-08-04	Aug	32	Fall Kite Event	Web Site Sales	Quad	68.13
2020-08-03	Aug	32	Fall Kite Event	In Store Sales	Quad	33.06
2020-08-07	Aug	32	Fall Kite Event	Web Site Sales	Sunbell	24.11
2020-08-03	Aug	32	Fall Kite Event	In Store Sales	Sunset	47.02
2020-08-29	Aug	35	Fall Kite Event	Web Site Sales	Aspen	38.88
2020-08-17	Aug	34	Fall Kite Event	E-mail Coupon	Sunset	424.33
2020-05-11	May	20	None	Web Site Sales	Sunshine	40.93
2020-08-28	Aug	35	Fall Kite Event	In Store Sales	Crested Beaut	48.24
2020-06-26	Jun	26	Festival of Flight	Web Site Sales	Quad	102.29
2020-09-26	Sep	39	None	Web Site Sales	Carlota	92.2
2020-06-23	Jun	26	Festival of Flight	Web Site Sales	Carlota	46.33
2020-08-20	Aug	34	Fall Kite Event	In Store Sales	Sunshine	40.55
2020-08-19	Aug	34	Fall Kite Event	Web Site Sales	Quad	66.57
2020-05-23	May	21	None	In Store Sales	Crested Beaut	72.52
2020-08-26	Aug	35	Fall Kite Event	Web Site Sales	Quad	66.85
2020-06-09	Jun	24	Festival of Flight	In Store Sales	Sunset	47.86
2020-05-24	May	22	None	E-mail Coupon	Doublers	160.63
2020-08-21	Aug	34	Fall Kite Event	E-mail Coupon	Sunbell	75.06
2020-08-13	Aug	33	Fall Kite Event	Web Site Sales	Quad	66.45
2020-06-21	Jun	26	Festival of Flight	Web Site Sales	Carlota	23.85
2020-08-12	Aug	33	Fall Kite Event	Web Site Sales	Carlota	23.49
2020-08-18	Aug	34	Fall Kite Event	In Store Sales	Sunbell	72.64
2020-08-04	Aug	32	Fall Kite Event	In Store Sales	Doublers	320.73
2020-05-13	May	20	None	E-mail Coupon	Sunbell	48.58
2020-08-26	Aug	35	Fall Kite Event	In Store Sales	Bellen	23.35
2020-08-21	Aug	34	Fall Kite Event	E-mail Coupon	Quad	99.1
2020-08-29	Aug	35	Fall Kite Event	In Store Sales	Bellen	46.34
2020-06-27	Jun	26	Festival of Flight	In Store Sales	Quad	68.2
2020-07-04	Jul	27	None	Web Site Sales	Doublers	160.19
2020-08-27	Aug	35	Fall Kite Event	E-mail Coupon	Quad	34.95
2020-08-31	Aug	36	None	In Store Sales	Sunshine	20.39
2020-06-14	Jun	25	Festival of Flight	Web Site Sales	Quad	549.31
2020-07-25	Jul	30	None	Web Site Sales	Doublers	240.27
2020-06-20	Jun	25	Festival of Flight	Web Site Sales	Carlota	69.11
2020-07-26	Jul	31	None	In Store Sales	Carlota	44.59
2020-08-24	Aug	35	Fall Kite Event	In Store Sales	Quad	68.65
2020-06-02	Jun	23	Festival of Flight	Web Site Sales	Sunbell	24.83
2020-06-07	Jun	24	Festival of Flight	Web Site Sales	Majectic Beaut	28.88
2020-08-03	Aug	32	Fall Kite Event	Web Site Sales	Majectic Beaut	87.73
2020-08-28	Aug	35	Fall Kite Event	In Store Sales	Aspen	42.53
2020-05-28	May	22	None	Web Site Sales	Doublers	240.01
2020-08-11	Aug	33	Fall Kite Event	In Store Sales	Sunshine	40.41
2020-08-21	Aug	34	Fall Kite Event	Web Site Sales	Aspen	38.68
2020-08-11	Aug	33	Fall Kite Event	In Store Sales	Sunbell	46.17
2020-08-24	Aug	35	Fall Kite Event	Web Site Sales	Bellen	22.7
2020-08-12	Aug	33	Fall Kite Event	In Store Sales	Aspen	60.17
2020-09-16	Sep	38	None	In Store Sales	Quad	99.79
2020-06-03	Jun	23	Festival of Flight	Web Site Sales	Sunbell	24.1
2020-08-24	Aug	35	Fall Kite Event	In Store Sales	Carlota	46.93
2020-08-07	Aug	32	Fall Kite Event	In Store Sales	Sunshine	100.09
2020-05-19	May	21	None	In Store Sales	Bellen	66.88
2020-05-12	May	20	None	Web Site Sales	Quad	34.71
2020-08-05	Aug	32	Fall Kite Event	In Store Sales	Sunset	71.4
2020-06-29	Jun	27	None	Web Site Sales	V-Rang	36.27
2020-07-16	Jul	29	None	In Store Sales	Sunbell	75.9
2020-06-20	Jun	25	Festival of Flight	Web Site Sales	Sunshine	40.99
2020-05-25	May	22	None	Web Site Sales	Carlota	46.06
2020-06-09	Jun	24	Festival of Flight	Web Site Sales	Quad	66.27
2020-07-24	Jul	30	None	Web Site Sales	Crested Beaut	72.66
2020-06-11	Jun	24	Festival of Flight	E-mail Coupon	Quad	170.23
2020-08-02	Aug	32	Fall Kite Event	Web Site Sales	Doublers	160.79
2020-08-15	Aug	33	Fall Kite Event	In Store Sales	Sunbell	69.88
2020-08-10	Aug	33	Fall Kite Event	Web Site Sales	Majectic Beaut	29.03
2020-08-18	Aug	34	Fall Kite Event	In Store Sales	Sunbell	48.12
2020-06-28	Jun	27	None	Web Site Sales	Majectic Beaut	60.99
2020-08-22	Aug	34	Fall Kite Event	In Store Sales	Quad	96.19
2020-08-02	Aug	32	Fall Kite Event	Web Site Sales	Quad	99.33
2020-05-12	May	20	None	Web Site Sales	Aspen	63.09
2020-08-28	Aug	35	Fall Kite Event	Web Site Sales	Sunshine	60.02
2020-08-06	Aug	32	Fall Kite Event	In Store Sales	V-Rang	19.47
2020-06-03	Jun	23	Festival of Flight	Web Site Sales	Carlota	414.97
2020-06-15	Jun	25	Festival of Flight	Web Site Sales	Bellen	46.07
2020-06-09	Jun	24	Festival of Flight	In Store Sales	Majectic Beaut	399.27
2020-06-14	Jun	25	Festival of Flight	Web Site Sales	Majectic Beaut	120.5
2020-08-04	Aug	32	Fall Kite Event	Web Site Sales	Bellen	46.03
2020-06-19	Jun	25	Festival of Flight	In Store Sales	Sunshine	57.39
2020-05-05	May	19	None	E-mail Coupon	Bellen	69.67
2020-06-06	Jun	23	Festival of Flight	In Store Sales	Carlota	46.21
2020-08-08	Aug	32	Fall Kite Event	In Store Sales	Bellen	46.46
2020-08-15	Aug	33	Fall Kite Event	E-mail Coupon	Carlota	23.13
2020-08-20	Aug	34	Fall Kite Event	In Store Sales	Bellen	46.51
2020-06-04	Jun	23	Festival of Flight	E-mail Coupon	Aspen	20.56
2020-07-30	Jul	31	None	Web Site Sales	Sunset	71.09
2020-08-07	Aug	32	Fall Kite Event	In Store Sales	Crested Beaut	72.19
2020-08-04	Aug	32	Fall Kite Event	Web Site Sales	Sunbell	72.67
2020-08-03	Aug	32	Fall Kite Event	In Store Sales	FlatTop	27.27
2020-06-24	Jun	26	Festival of Flight	Web Site Sales	Sunshine	60.59
2020-06-10	Jun	24	Festival of Flight	Web Site Sales	Bellen	23.48
2020-08-26	Aug	35	Fall Kite Event	Web Site Sales	Majectic Beaut	579.64
2020-08-09	Aug	33	Fall Kite Event	In Store Sales	Carlota	23.77
2020-09-19	Sep	38	None	Web Site Sales	Carlota	66.06
2020-08-05	Aug	32	Fall Kite Event	In Store Sales	Carlota	334.32
2020-06-26	Jun	26	Festival of Flight	Web Site Sales	Doublers	152.08
2020-06-15	Jun	25	Festival of Flight	In Store Sales	Quad	66.45
2020-08-16	Aug	34	Fall Kite Event	Web Site Sales	Bellen	23.97
2020-08-07	Aug	32	Fall Kite Event	In Store Sales	Carlota	66.71
2020-09-24	Sep	39	None	In Store Sales	Quad	711.07
2020-05-10	May	20	None	Web Site Sales	Quad	68.1
2020-06-28	Jun	27	None	Web Site Sales	Majectic Beaut	90.4
2020-07-10	Jul	28	None	In Store Sales	Quad	68.43
2020-07-22	Jul	30	None	Web Site Sales	Sunbell	75.88
2020-08-07	Aug	32	Fall Kite Event	In Store Sales	Sunbell	100.81
2020-08-06	Aug	32	Fall Kite Event	Web Site Sales	Majectic Beaut	58.45
2020-06-07	Jun	24	Festival of Flight	Web Site Sales	Sunshine	20.72
2020-08-07	Aug	32	Fall Kite Event	Web Site Sales	Aspen	40.53
2020-05-19	May	21	None	In Store Sales	Majectic Beaut	87.67
2020-06-08	Jun	24	Festival of Flight	Web Site Sales	Quad	102.13
2020-06-28	Jun	27	None	In Store Sales	Sunset	513.49
2020-06-21	Jun	26	Festival of Flight	Web Site Sales	Majectic Beaut	28.03
2020-08-25	Aug	35	Fall Kite Event	In Store Sales	Bellen	69
2020-08-01	Aug	31	None	Web Site Sales	Majectic Beaut	661.04
2020-08-30	Aug	36	None	In Store Sales	Bellen	23.67
2020-06-16	Jun	25	Festival of Flight	Web Site Sales	Bellen	46.56
2020-06-08	Jun	24	Festival of Flight	In Store Sales	Bellen	23.9
2020-08-09	Aug	33	Fall Kite Event	In Store Sales	Doublers	160.35
2020-06-25	Jun	26	Festival of Flight	Web Site Sales	Doublers	240.49
2020-06-19	Jun	25	Festival of Flight	E-mail Coupon	Carlota	46.12
2020-08-18	Aug	34	Fall Kite Event	In Store Sales	Majectic Beaut	29.79
2020-08-25	Aug	35	Fall Kite Event	Web Site Sales	Doublers	240.57
2020-06-07	Jun	24	Festival of Flight	In Store Sales	Sunshine	40.66
2020-06-06	Jun	23	Festival of Flight	In Store Sales	Sunshine	60.15
2020-08-14	Aug	33	Fall Kite Event	In Store Sales	Doublers	240.69
2020-06-16	Jun	25	Festival of Flight	In Store Sales	Carlota	46.89
2020-08-24	Aug	35	Fall Kite Event	In Store Sales	Sunshine	20.39
2020-08-03	Aug	32	Fall Kite Event	In Store Sales	Quad	66.39
2020-08-17	Aug	34	Fall Kite Event	In Store Sales	Quad	96.01
2020-08-21	Aug	34	Fall Kite Event	Web Site Sales	Carlota	46.03
2020-06-04	Jun	23	Festival of Flight	Web Site Sales	Crested Beaut	25.91
2020-06-06	Jun	23	Festival of Flight	E-mail Coupon	Carlota	305.52
2020-06-23	Jun	26	Festival of Flight	Web Site Sales	Quad	198.99
2020-08-08	Aug	32	Fall Kite Event	Web Site Sales	Bellen	523.39
2020-06-08	Jun	24	Festival of Flight	In Store Sales	Crested Beaut	50.31
2020-05-05	May	19	None	Web Site Sales	Sunset	514.02
2020-08-12	Aug	33	Fall Kite Event	In Store Sales	Majectic Beaut	58.12
2020-09-22	Sep	39	None	E-mail Coupon	Sunset	23.24
2020-06-09	Jun	24	Festival of Flight	Web Site Sales	Bellen	46.76
2020-06-27	Jun	26	Festival of Flight	In Store Sales	Bellen	69.53
2020-08-22	Aug	34	Fall Kite Event	In Store Sales	Sunshine	60.42
2020-06-19	Jun	25	Festival of Flight	Web Site Sales	Crested Beaut	48.29
2020-08-19	Aug	34	Fall Kite Event	In Store Sales	V-Rang	38.15
2020-08-24	Aug	35	Fall Kite Event	Web Site Sales	Quad	608.86
2020-06-16	Jun	25	Festival of Flight	Web Site Sales	Bellen	23.21
2020-06-18	Jun	25	Festival of Flight	Web Site Sales	Sunshine	40.42
2020-08-24	Aug	35	Fall Kite Event	E-mail Coupon	Carlota	46.45
2020-05-23	May	21	None	Web Site Sales	Quad	34.47
2020-06-25	Jun	26	Festival of Flight	Web Site Sales	Majectic Beaut	58.2
2020-07-14	Jul	29	None	In Store Sales	Sunset	363.9
2020-06-20	Jun	25	Festival of Flight	Web Site Sales	Quad	66.46
2020-06-17	Jun	25	Festival of Flight	In Store Sales	Carlota	46.2
2020-08-11	Aug	33	Fall Kite Event	In Store Sales	Sunshine	20.7
2020-09-20	Sep	39	None	Web Site Sales	Sunbell	48.29
2020-08-28	Aug	35	Fall Kite Event	In Store Sales	Sunshine	379.58
2020-08-19	Aug	34	Fall Kite Event	Web Site Sales	Bellen	23.84
2020-08-07	Aug	32	Fall Kite Event	In Store Sales	Sunshine	38.62
2020-08-19	Aug	34	Fall Kite Event	In Store Sales	Sunset	24.68
2020-06-23	Jun	26	Festival of Flight	In Store Sales	Quad	66.98
2020-06-30	Jun	27	None	Web Site Sales	Sunbell	50.45
2020-05-17	May	21	None	Web Site Sales	Aspen	60.4
2020-06-18	Jun	25	Festival of Flight	Web Site Sales	Carlota	46.65
2020-08-10	Aug	33	Fall Kite Event	In Store Sales	Sunbell	184.91
2020-06-12	Jun	24	Festival of Flight	In Store Sales	Carlota	69.7
2020-06-02	Jun	23	Festival of Flight	Web Site Sales	Bellen	46.06
2020-07-13	Jul	29	None	Web Site Sales	Carlota	22.79
2020-08-12	Aug	33	Fall Kite Event	In Store Sales	Quad	99.38
2020-06-15	Jun	25	Festival of Flight	In Store Sales	Carlota	23.61
2020-06-15	Jun	25	Festival of Flight	In Store Sales	Quad	102.39
2020-06-08	Jun	24	Festival of Flight	E-mail Coupon	Aspen	80.18
2020-06-10	Jun	24	Festival of Flight	Web Site Sales	Sunshine	40.35
2020-06-27	Jun	26	Festival of Flight	Web Site Sales	Carlota	436
2020-07-16	Jul	29	None	Web Site Sales	Aspen	60.23
2020-08-26	Aug	35	Fall Kite Event	Web Site Sales	Doublers	228.56
2020-08-27	Aug	35	Fall Kite Event	In Store Sales	Sunbell	48.14
2020-08-28	Aug	35	Fall Kite Event	Web Site Sales	Sunshine	40.35
2020-06-17	Jun	25	Festival of Flight	In Store Sales	Carlota	69.96
2020-08-07	Aug	32	Fall Kite Event	Web Site Sales	Majectic Beaut	58.3
2020-08-09	Aug	33	Fall Kite Event	In Store Sales	Quad	132.06
2020-06-25	Jun	26	Festival of Flight	In Store Sales	Bellen	92.87
2020-05-04	May	19	None	In Store Sales	Sunshine	60.03
2020-05-29	May	22	None	In Store Sales	Sunset	71.84
2020-06-01	Jun	23	Festival of Flight	Web Site Sales	Crested Beaut	24.49
2020-08-15	Aug	33	Fall Kite Event	Web Site Sales	Sunbell	125.78
2020-08-12	Aug	33	Fall Kite Event	In Store Sales	Sunbell	23.92
2020-06-09	Jun	24	Festival of Flight	Web Site Sales	Carlota	46.42
2020-06-30	Jun	27	None	Web Site Sales	Quad	32.96
2020-07-14	Jul	29	None	Web Site Sales	Aspen	60.85
2020-08-09	Aug	33	Fall Kite Event	In Store Sales	Sunbell	23.13
2020-06-29	Jun	27	None	In Store Sales	Crested Beaut	48.51
2020-08-20	Aug	34	Fall Kite Event	In Store Sales	Sunbell	75.92
2020-09-04	Sep	36	None	Web Site Sales	Sunshine	38.51
2020-06-02	Jun	23	Festival of Flight	In Store Sales	Carlota	46.77
2020-08-10	Aug	33	Fall Kite Event	In Store Sales	Bellen	92.26
2020-08-30	Aug	36	None	In Store Sales	Sunshine	20.78
2020-06-13	Jun	24	Festival of Flight	E-mail Coupon	Sunset	71.64
2020-06-09	Jun	24	Festival of Flight	Web Site Sales	Bellen	66.82
2020-08-02	Aug	32	Fall Kite Event	In Store Sales	Sunshine	60.24
2020-06-26	Jun	26	Festival of Flight	Web Site Sales	Majectic Beaut	116.11
2020-08-30	Aug	36	None	E-mail Coupon	FlatTop	28.5
2020-08-29	Aug	35	Fall Kite Event	In Store Sales	Carlota	69.54
2020-05-11	May	20	None	In Store Sales	Bellen	44.77
2020-06-10	Jun	24	Festival of Flight	Web Site Sales	Bellen	46.79
2020-06-26	Jun	26	Festival of Flight	Web Site Sales	Sunshine	19.5
2020-08-23	Aug	35	Fall Kite Event	In Store Sales	Bellen	46.42
2020-06-10	Jun	24	Festival of Flight	In Store Sales	Aspen	60.36
2020-07-23	Jul	30	None	Web Site Sales	Majectic Beaut	87.89
2020-08-17	Aug	34	Fall Kite Event	Web Site Sales	Sunshine	60.19
2020-08-29	Aug	35	Fall Kite Event	In Store Sales	Quad	66.76
2020-08-10	Aug	33	Fall Kite Event	Web Site Sales	Sunbell	75.96
2020-08-15	Aug	33	Fall Kite Event	In Store Sales	Sunshine	38.38
2020-08-08	Aug	32	Fall Kite Event	In Store Sales	Sunbell	50.56
2020-05-25	May	22	None	Web Site Sales	Carlota	46.8
2020-06-17	Jun	25	Festival of Flight	Web Site Sales	Carlota	46.74
2020-06-05	Jun	23	Festival of Flight	Web Site Sales	V-Rang	38.09
2020-05-19	May	21	None	Web Site Sales	Carlota	23.7
2020-08-16	Aug	34	Fall Kite Event	In Store Sales	Carlota	69.17
2020-07-01	Jul	27	None	In Store Sales	Sunshine	20.07
2020-07-02	Jul	27	None	E-mail Coupon	Sunshine	20.4
2020-06-11	Jun	24	Festival of Flight	Web Site Sales	Majectic Beaut	30.14
2020-06-27	Jun	26	Festival of Flight	Web Site Sales	Sunshine	60.85
2020-09-18	Sep	38	None	Web Site Sales	Carlota	23
2020-08-06	Aug	32	Fall Kite Event	E-mail Coupon	Sunshine	20.13
2020-08-30	Aug	36	None	Web Site Sales	Crested Beaut	50.15
2020-06-20	Jun	25	Festival of Flight	Web Site Sales	Majectic Beaut	58.02
2020-09-11	Sep	37	None	Web Site Sales	Sunbell	50.49
2020-08-07	Aug	32	Fall Kite Event	In Store Sales	Doublers	240.64
2020-06-16	Jun	25	Festival of Flight	Web Site Sales	Sunbell	48.52
2020-08-10	Aug	33	Fall Kite Event	In Store Sales	Carlota	46.42
2020-09-11	Sep	37	None	In Store Sales	Bellen	46.91
2020-08-16	Aug	34	Fall Kite Event	In Store Sales	Quad	33.12
2020-06-21	Jun	26	Festival of Flight	Web Site Sales	FlatTop	55.38
2020-08-07	Aug	32	Fall Kite Event	E-mail Coupon	Quad	33.01
2020-05-21	May	21	None	E-mail Coupon	Sunshine	40.51
2020-07-18	Jul	29	None	Web Site Sales	Bellen	46.83
2020-06-05	Jun	23	Festival of Flight	Web Site Sales	Quad	64.58
2020-06-28	Jun	27	None	In Store Sales	Sunset	23.73
2020-07-19	Jul	30	None	Web Site Sales	Quad	533.77
2020-08-12	Aug	33	Fall Kite Event	In Store Sales	Quad	66.47
2020-08-19	Aug	34	Fall Kite Event	Web Site Sales	Carlota	69.93
2020-08-31	Aug	36	None	E-mail Coupon	Sunset	24.29
2020-08-16	Aug	34	Fall Kite Event	Web Site Sales	Quad	33.9
2020-08-01	Aug	31	None	In Store Sales	Sunset	23.04
2020-06-18	Jun	25	Festival of Flight	Web Site Sales	Quad	68.12
2020-08-26	Aug	35	Fall Kite Event	In Store Sales	FlatTop	55.47
2020-09-21	Sep	39	None	In Store Sales	Aspen	21.78
2020-06-06	Jun	23	Festival of Flight	Web Site Sales	Carlota	154.74
2020-06-02	Jun	23	Festival of Flight	Web Site Sales	Quad	64.26
2020-08-30	Aug	36	None	In Store Sales	Sunbell	72.85
2020-08-21	Aug	34	Fall Kite Event	Web Site Sales	Sunshine	20.51
2020-06-29	Jun	27	None	Web Site Sales	Majectic Beaut	56.81
2020-08-18	Aug	34	Fall Kite Event	Web Site Sales	Carlota	69.49
2020-05-04	May	19	None	In Store Sales	Aspen	38.38
2020-06-06	Jun	23	Festival of Flight	Web Site Sales	Carlota	46.83
2020-08-16	Aug	34	Fall Kite Event	In Store Sales	Sunshine	80.09
2020-06-09	Jun	24	Festival of Flight	E-mail Coupon	Majectic Beaut	29.98
2020-06-16	Jun	25	Festival of Flight	In Store Sales	Sunshine	40.22
2020-06-30	Jun	27	None	In Store Sales	Carlota	69.61
2020-05-28	May	22	None	Web Site Sales	Sunbell	75.72
2020-08-27	Aug	35	Fall Kite Event	E-mail Coupon	Carlota	44.63
2020-06-20	Jun	25	Festival of Flight	Web Site Sales	Quad	66.64
2020-08-03	Aug	32	Fall Kite Event	In Store Sales	Quad	102.7
2020-06-12	Jun	24	Festival of Flight	Web Site Sales	Majectic Beaut	90.32
2020-06-08	Jun	24	Festival of Flight	In Store Sales	Sunshine	20.99
2020-05-03	May	19	None	Web Site Sales	Majectic Beaut	523.23
2020-08-25	Aug	35	Fall Kite Event	Web Site Sales	Aspen	38.64
2020-08-11	Aug	33	Fall Kite Event	In Store Sales	Sunshine	76.41
2020-08-21	Aug	34	Fall Kite Event	In Store Sales	Majectic Beaut	29.83
2020-06-29	Jun	27	None	Web Site Sales	Sunbell	72.44
2020-08-20	Aug	34	Fall Kite Event	Web Site Sales	Doublers	1629.58
2020-08-09	Aug	33	Fall Kite Event	E-mail Coupon	Sunshine	60.32
2020-08-15	Aug	33	Fall Kite Event	Web Site Sales	V-Rang	36.17
2020-06-17	Jun	25	Festival of Flight	In Store Sales	Majectic Beaut	58.4
2020-08-03	Aug	32	Fall Kite Event	Web Site Sales	FlatTop	83.71
2020-08-09	Aug	33	Fall Kite Event	In Store Sales	V-Rang	235.88
2020-08-24	Aug	35	Fall Kite Event	Web Site Sales	Sunset	47.76
2020-06-11	Jun	24	Festival of Flight	In Store Sales	Quad	96.87
2020-07-04	Jul	27	None	In Store Sales	Sunshine	60.11
2020-06-12	Jun	24	Festival of Flight	In Store Sales	Quad	66.43
2020-08-26	Aug	35	Fall Kite Event	In Store Sales	Majectic Beaut	29.07
2020-08-11	Aug	33	Fall Kite Event	In Store Sales	Sunshine	40.41
2020-08-25	Aug	35	Fall Kite Event	Web Site Sales	Quad	66.04
2020-08-03	Aug	32	Fall Kite Event	In Store Sales	FlatTop	28.05
2020-06-24	Jun	26	Festival of Flight	E-mail Coupon	Sunshine	60.43
2020-08-14	Aug	33	Fall Kite Event	In Store Sales	Aspen	63.09
2020-08-29	Aug	35	Fall Kite Event	In Store Sales	Sunbell	24.12
2020-06-02	Jun	23	Festival of Flight	E-mail Coupon	Bellen	46.11
2020-06-14	Jun	25	Festival of Flight	Web Site Sales	Sunset	90.79
2020-07-14	Jul	29	None	In Store Sales	Majectic Beaut	60.48
2020-05-01	May	18	None	Web Site Sales	Bellen	69.27
2020-06-15	Jun	25	Festival of Flight	E-mail Coupon	FlatTop	353.19
2020-07-06	Jul	28	None	In Store Sales	Majectic Beaut	56.2
2020-07-04	Jul	27	None	Web Site Sales	Sunbell	72.91
2020-06-26	Jun	26	Festival of Flight	Web Site Sales	Crested Beaut	23.06
2020-06-04	Jun	23	Festival of Flight	Web Site Sales	Sunshine	40.16
2020-08-23	Aug	35	Fall Kite Event	E-mail Coupon	Sunshine	40.81
2020-08-15	Aug	33	Fall Kite Event	In Store Sales	Carlota	69.27
2020-05-11	May	20	None	In Store Sales	Sunshine	38.28
2020-06-19	Jun	25	Festival of Flight	Web Site Sales	Carlota	371.36
2020-06-03	Jun	23	Festival of Flight	Web Site Sales	V-Rang	36.41
2020-06-10	Jun	24	Festival of Flight	In Store Sales	Majectic Beaut	30.96
2020-08-27	Aug	35	Fall Kite Event	Web Site Sales	Aspen	60.33
2020-07-25	Jul	30	None	Web Site Sales	Bellen	44.83
2020-08-21	Aug	34	Fall Kite Event	Web Site Sales	Aspen	21.18
2020-06-04	Jun	23	Festival of Flight	Web Site Sales	Quad	64.23
2020-08-20	Aug	34	Fall Kite Event	Web Site Sales	Quad	66.1
2020-06-13	Jun	24	Festival of Flight	Web Site Sales	Bellen	23.82
2020-06-09	Jun	24	Festival of Flight	In Store Sales	Bellen	46.42
2020-06-09	Jun	24	Festival of Flight	Web Site Sales	Aspen	60.84
2020-06-14	Jun	25	Festival of Flight	Web Site Sales	Carlota	230.77
2020-08-17	Aug	34	Fall Kite Event	In Store Sales	Carlota	46.1
2020-08-02	Aug	32	Fall Kite Event	In Store Sales	Sunshine	40.31
2020-07-30	Jul	31	None	Web Site Sales	Bellen	46.44
2020-05-19	May	21	None	In Store Sales	Bellen	69.92
2020-08-08	Aug	32	Fall Kite Event	In Store Sales	Quad	99.88
2020-07-08	Jul	28	None	Web Site Sales	Quad	102.42
2020-05-03	May	19	None	Web Site Sales	Quad	33.2
2020-07-12	Jul	29	None	E-mail Coupon	Bellen	23.69
2020-06-11	Jun	24	Festival of Flight	Web Site Sales	Carlota	69.89
2020-08-11	Aug	33	Fall Kite Event	In Store Sales	Aspen	60.59
2020-08-15	Aug	33	Fall Kite Event	In Store Sales	Quad	33.63
2020-07-04	Jul	27	None	E-mail Coupon	V-Rang	18.03
2020-08-26	Aug	35	Fall Kite Event	In Store Sales	Crested Beaut	50.79
2020-08-18	Aug	34	Fall Kite Event	E-mail Coupon	Sunshine	40.17
2020-08-17	Aug	34	Fall Kite Event	In Store Sales	Sunshine	60.31
2020-07-28	Jul	31	None	Web Site Sales	V-Rang	291.74
2020-06-10	Jun	24	Festival of Flight	Web Site Sales	Sunbell	479.83
2020-06-04	Jun	23	Festival of Flight	In Store Sales	Bellen	46.96
2020-06-25	Jun	26	Festival of Flight	In Store Sales	Bellen	414.39
2020-06-16	Jun	25	Festival of Flight	In Store Sales	Sunshine	20.09
2020-08-05	Aug	32	Fall Kite Event	In Store Sales	Majectic Beaut	28.05
2020-08-27	Aug	35	Fall Kite Event	Web Site Sales	Bellen	69.24
2020-06-18	Jun	25	Festival of Flight	Web Site Sales	Bellen	46.02
2020-08-12	Aug	33	Fall Kite Event	Web Site Sales	Quad	99.06
2020-08-20	Aug	34	Fall Kite Event	In Store Sales	Quad	128.77
2020-08-13	Aug	33	Fall Kite Event	In Store Sales	Doublers	80.52
2020-06-30	Jun	27	None	E-mail Coupon	Bellen	46.66
2020-06-04	Jun	23	Festival of Flight	Web Site Sales	Quad	34.56
2020-08-20	Aug	34	Fall Kite Event	In Store Sales	FlatTop	83.26
2020-05-11	May	20	None	Web Site Sales	Sunbell	24.98
2020-07-31	Jul	31	None	Web Site Sales	Majectic Beaut	29.03
2020-08-14	Aug	33	Fall Kite Event	Web Site Sales	Sunshine	57.46
2020-06-18	Jun	25	Festival of Flight	Web Site Sales	Sunbell	50.96
2020-05-08	May	19	None	Web Site Sales	Crested Beaut	50.94
2020-05-16	May	20	None	In Store Sales	Sunshine	80.92
2020-07-29	Jul	31	None	In Store Sales	Majectic Beaut	627.74
2020-09-06	Sep	37	None	Web Site Sales	Quad	68.6
2020-08-18	Aug	34	Fall Kite Event	E-mail Coupon	Majectic Beaut	28.42
2020-06-25	Jun	26	Festival of Flight	Web Site Sales	Sunbell	24.63
2020-06-26	Jun	26	Festival of Flight	Web Site Sales	Bellen	69.85
2020-08-02	Aug	32	Fall Kite Event	In Store Sales	Sunset	357.01
2020-08-12	Aug	33	Fall Kite Event	Web Site Sales	Aspen	361.57
2020-07-31	Jul	31	None	In Store Sales	Bellen	46.48
2020-09-28	Sep	40	None	Web Site Sales	V-Rang	19.42
2020-06-22	Jun	26	Festival of Flight	Web Site Sales	Bellen	69.89
2020-08-04	Aug	32	Fall Kite Event	Web Site Sales	Majectic Beaut	29.71
2020-06-22	Jun	26	Festival of Flight	Web Site Sales	Quad	132.71
2020-06-10	Jun	24	Festival of Flight	E-mail Coupon	Carlota	46.05
2020-06-25	Jun	26	Festival of Flight	Web Site Sales	Quad	68.14
2020-05-07	May	19	None	In Store Sales	Quad	99.54
2020-08-31	Aug	36	None	In Store Sales	Quad	99.9
2020-06-21	Jun	26	Festival of Flight	Web Site Sales	Sunbell	69.7
2020-08-11	Aug	33	Fall Kite Event	In Store Sales	Quad	66.4
2020-05-27	May	22	None	E-mail Coupon	Sunshine	80.04
2020-08-14	Aug	33	Fall Kite Event	In Store Sales	V-Rang	57.55
2020-08-11	Aug	33	Fall Kite Event	Web Site Sales	Bellen	46.61
2020-08-14	Aug	33	Fall Kite Event	In Store Sales	Sunshine	20.64
2020-08-01	Aug	31	None	In Store Sales	Quad	68.99
2020-07-09	Jul	28	None	Web Site Sales	Carlota	69.37
2020-07-13	Jul	29	None	Web Site Sales	Doublers	80.55
2020-08-07	Aug	32	Fall Kite Event	In Store Sales	FlatTop	80.15
2020-06-30	Jun	27	None	Web Site Sales	Aspen	20.86
2020-07-08	Jul	28	None	In Store Sales	Sunbell	92.02
2020-06-14	Jun	25	Festival of Flight	Web Site Sales	Quad	136.16
2020-06-30	Jun	27	None	E-mail Coupon	Sunset	406.37
2020-06-30	Jun	27	None	Web Site Sales	Carlota	22.12
2020-06-14	Jun	25	Festival of Flight	Web Site Sales	Sunset	94.75
2020-06-07	Jun	24	Festival of Flight	Web Site Sales	Quad	99.43
2020-07-22	Jul	30	None	E-mail Coupon	Bellen	46.48
2020-08-10	Aug	33	Fall Kite Event	In Store Sales	Bellen	23.49
2020-06-19	Jun	25	Festival of Flight	In Store Sales	Sunshine	38.98
2020-08-26	Aug	35	Fall Kite Event	Web Site Sales	Quad	32.01
2020-08-01	Aug	31	None	In Store Sales	FlatTop	496.26
2020-08-17	Aug	34	Fall Kite Event	E-mail Coupon	Carlota	69.11
2020-06-09	Jun	24	Festival of Flight	In Store Sales	Carlota	46.92
2020-06-14	Jun	25	Festival of Flight	Web Site Sales	Sunshine	19.93
2020-06-30	Jun	27	None	Web Site Sales	V-Rang	57.54
2020-09-02	Sep	36	None	Web Site Sales	Sunshine	160.07
2020-09-04	Sep	36	None	E-mail Coupon	Quad	132.12
2020-06-29	Jun	27	None	In Store Sales	Sunshine	341.17
2020-05-04	May	19	None	Web Site Sales	Sunbell	23.93
2020-06-10	Jun	24	Festival of Flight	E-mail Coupon	Crested Beaut	50.36
2020-08-18	Aug	34	Fall Kite Event	In Store Sales	Quad	102.49
2020-06-16	Jun	25	Festival of Flight	Web Site Sales	Quad	66.41
2020-08-17	Aug	34	Fall Kite Event	In Store Sales	Majectic Beaut	28.58
2020-08-30	Aug	36	None	Web Site Sales	Sunset	24.26
2020-08-03	Aug	32	Fall Kite Event	In Store Sales	Crested Beaut	69.52
2020-08-14	Aug	33	Fall Kite Event	Web Site Sales	Sunbell	69.86
2020-06-07	Jun	24	Festival of Flight	In Store Sales	FlatTop	28.4
2020-08-20	Aug	34	Fall Kite Event	In Store Sales	Aspen	19.69
2020-06-17	Jun	25	Festival of Flight	Web Site Sales	V-Rang	38.35
2020-08-04	Aug	32	Fall Kite Event	In Store Sales	Aspen	42.8
2020-06-24	Jun	26	Festival of Flight	Web Site Sales	Sunbell	48.82
2020-06-14	Jun	25	Festival of Flight	In Store Sales	Aspen	57.91
2020-08-05	Aug	32	Fall Kite Event	In Store Sales	Aspen	60.43
2020-06-11	Jun	24	Festival of Flight	Web Site Sales	Carlota	70
2020-07-27	Jul	31	None	Web Site Sales	Sunbell	72.58
2020-06-25	Jun	26	Festival of Flight	In Store Sales	Quad	68.63
2020-06-22	Jun	26	Festival of Flight	In Store Sales	Bellen	23.17
2020-06-28	Jun	27	None	Web Site Sales	V-Rang	57.22
2020-06-05	Jun	23	Festival of Flight	Web Site Sales	Sunbell	96.2
2020-08-08	Aug	32	Fall Kite Event	In Store Sales	Carlota	69.31
2020-06-22	Jun	26	Festival of Flight	In Store Sales	Sunshine	60.43
2020-06-19	Jun	25	Festival of Flight	In Store Sales	Doublers	160
2020-08-23	Aug	35	Fall Kite Event	In Store Sales	Quad	68.37
2020-06-13	Jun	24	Festival of Flight	In Store Sales	FlatTop	28.39
2020-06-13	Jun	24	Festival of Flight	E-mail Coupon	FlatTop	80.81
2020-07-20	Jul	30	None	In Store Sales	Sunshine	60.74
2020-06-02	Jun	23	Festival of Flight	In Store Sales	Sunshine	40.72
2020-06-10	Jun	24	Festival of Flight	Web Site Sales	Carlota	23.63
2020-06-30	Jun	27	None	Web Site Sales	Quad	132.34
2020-06-25	Jun	26	Festival of Flight	Web Site Sales	Doublers	160.32
2020-06-21	Jun	26	Festival of Flight	In Store Sales	Quad	96.94
2020-06-16	Jun	25	Festival of Flight	E-mail Coupon	Crested Beaut	69.14
2020-08-27	Aug	35	Fall Kite Event	In Store Sales	Carlota	46.76
2020-08-16	Aug	34	Fall Kite Event	Web Site Sales	Quad	68.98
2020-06-02	Jun	23	Festival of Flight	Web Site Sales	Sunbell	100.9
2020-08-29	Aug	35	Fall Kite Event	In Store Sales	Bellen	46.46
2020-08-05	Aug	32	Fall Kite Event	In Store Sales	Bellen	69.53
2020-08-01	Aug	31	None	Web Site Sales	Quad	533.53
2020-06-18	Jun	25	Festival of Flight	Web Site Sales	Bellen	46.41
2020-08-13	Aug	33	Fall Kite Event	Web Site Sales	Bellen	46.26
2020-05-25	May	22	None	Web Site Sales	Crested Beaut	120.58
2020-06-04	Jun	23	Festival of Flight	E-mail Coupon	Carlota	46.63
2020-06-23	Jun	26	Festival of Flight	E-mail Coupon	Doublers	160.41
2020-08-18	Aug	34	Fall Kite Event	E-mail Coupon	Quad	128.77
2020-09-16	Sep	38	None	Web Site Sales	Quad	33.89
2020-05-03	May	19	None	Web Site Sales	Sunshine	20.48
2020-08-20	Aug	34	Fall Kite Event	In Store Sales	Quad	68.6
2020-07-21	Jul	30	None	In Store Sales	Sunbell	168.36
2020-05-21	May	21	None	In Store Sales	Quad	99.75
2020-07-25	Jul	30	None	Web Site Sales	Sunbell	24.32
2020-08-12	Aug	33	Fall Kite Event	E-mail Coupon	Majectic Beaut	90.31
2020-07-21	Jul	30	None	Web Site Sales	Sunbell	23.7
2020-09-22	Sep	39	None	Web Site Sales	Quad	66.59
2020-08-22	Aug	34	Fall Kite Event	Web Site Sales	Sunbell	25.01
2020-09-14	Sep	38	None	Web Site Sales	Quad	33.48
2020-05-11	May	20	None	Web Site Sales	Crested Beaut	48.88
2020-08-17	Aug	34	Fall Kite Event	In Store Sales	Quad	66.66
2020-06-15	Jun	25	Festival of Flight	Web Site Sales	V-Rang	38.66
2020-09-17	Sep	38	None	Web Site Sales	Bellen	46.28
2020-05-01	May	18	None	E-mail Coupon	Doublers	78.44
2020-06-25	Jun	26	Festival of Flight	Web Site Sales	FlatTop	80.99
2020-06-13	Jun	24	Festival of Flight	Web Site Sales	Quad	68.4
2020-09-15	Sep	38	None	Web Site Sales	Carlota	92.84
2020-08-08	Aug	32	Fall Kite Event	Web Site Sales	Quad	136.28
2020-06-13	Jun	24	Festival of Flight	Web Site Sales	Quad	66.4
2020-08-25	Aug	35	Fall Kite Event	In Store Sales	Sunshine	19.01
2020-07-01	Jul	27	None	Web Site Sales	Crested Beaut	72.96
2020-07-26	Jul	31	None	In Store Sales	Bellen	46.81
2020-06-06	Jun	23	Festival of Flight	In Store Sales	Aspen	40.93
2020-08-17	Aug	34	Fall Kite Event	Web Site Sales	Sunbell	72.83
2020-06-21	Jun	26	Festival of Flight	In Store Sales	Sunset	24.73
2020-06-21	Jun	26	Festival of Flight	Web Site Sales	Majectic Beaut	112.69
2020-08-22	Aug	34	Fall Kite Event	In Store Sales	Quad	68.27
2020-08-07	Aug	32	Fall Kite Event	E-mail Coupon	Bellen	44.6
2020-08-04	Aug	32	Fall Kite Event	E-mail Coupon	Crested Beaut	72.05
2020-06-18	Jun	25	Festival of Flight	In Store Sales	Quad	66.4
2020-08-07	Aug	32	Fall Kite Event	In Store Sales	FlatTop	53.25
2020-08-31	Aug	36	None	Web Site Sales	Carlota	46.41
2020-05-30	May	22	None	E-mail Coupon	Majectic Beaut	58.09
2020-06-20	Jun	25	Festival of Flight	E-mail Coupon	Crested Beaut	75.83
2020-06-01	Jun	23	Festival of Flight	E-mail Coupon	Bellen	46.56
2020-08-25	Aug	35	Fall Kite Event	Web Site Sales	Majectic Beaut	116.59
2020-08-28	Aug	35	Fall Kite Event	In Store Sales	FlatTop	28.4
2020-08-29	Aug	35	Fall Kite Event	In Store Sales	Carlota	523.75
2020-06-17	Jun	25	Festival of Flight	Web Site Sales	Majectic Beaut	84.91
2020-06-11	Jun	24	Festival of Flight	Web Site Sales	Carlota	46.03
2020-08-13	Aug	33	Fall Kite Event	In Store Sales	Crested Beaut	404.81
2020-06-11	Jun	24	Festival of Flight	E-mail Coupon	Sunbell	48.73
2020-07-13	Jul	29	None	E-mail Coupon	Sunbell	25.89
2020-08-09	Aug	33	Fall Kite Event	Web Site Sales	Bellen	23.14
2020-06-24	Jun	26	Festival of Flight	In Store Sales	Carlota	66.36
2020-08-25	Aug	35	Fall Kite Event	Web Site Sales	V-Rang	36.28
2020-06-01	Jun	23	Festival of Flight	Web Site Sales	Sunset	118.63
2020-08-17	Aug	34	Fall Kite Event	In Store Sales	Majectic Beaut	87.53
2020-06-08	Jun	24	Festival of Flight	Web Site Sales	Aspen	40.99
2020-09-27	Sep	40	None	In Store Sales	Quad	99.79
2020-08-08	Aug	32	Fall Kite Event	In Store Sales	Crested Beaut	50.16
2020-08-18	Aug	34	Fall Kite Event	Web Site Sales	Aspen	57.47
2020-08-16	Aug	34	Fall Kite Event	In Store Sales	Sunbell	24.48
2020-08-04	Aug	32	Fall Kite Event	Web Site Sales	Majectic Beaut	58.42
2020-08-16	Aug	34	Fall Kite Event	E-mail Coupon	Sunbell	24.93
2020-08-25	Aug	35	Fall Kite Event	E-mail Coupon	Sunbell	23.15
2020-08-18	Aug	34	Fall Kite Event	In Store Sales	Doublers	234.43
2020-06-29	Jun	27	None	Web Site Sales	Sunset	94.96
2020-08-05	Aug	32	Fall Kite Event	In Store Sales	Crested Beaut	69.39
2020-07-16	Jul	29	None	In Store Sales	Quad	102.68
2020-06-24	Jun	26	Festival of Flight	Web Site Sales	Sunset	23.13
2020-06-14	Jun	25	Festival of Flight	In Store Sales	Sunshine	40.2
2020-06-25	Jun	26	Festival of Flight	Web Site Sales	Quad	68.86
2020-06-23	Jun	26	Festival of Flight	In Store Sales	Sunbell	72.83
2020-08-19	Aug	34	Fall Kite Event	In Store Sales	Aspen	63.23
2020-07-16	Jul	29	None	In Store Sales	Sunshine	200.3
2020-06-15	Jun	25	Festival of Flight	In Store Sales	Sunbell	46.68
2020-06-03	Jun	23	Festival of Flight	In Store Sales	Sunbell	46.76
2020-08-20	Aug	34	Fall Kite Event	In Store Sales	Carlota	69.9
2020-08-07	Aug	32	Fall Kite Event	In Store Sales	Sunbell	46.68
2020-08-03	Aug	32	Fall Kite Event	In Store Sales	Quad	64.23
2020-05-13	May	20	None	E-mail Coupon	Carlota	46.17
2020-08-25	Aug	35	Fall Kite Event	E-mail Coupon	FlatTop	27.69
2020-08-09	Aug	33	Fall Kite Event	E-mail Coupon	FlatTop	55.55
2020-09-09	Sep	37	None	E-mail Coupon	FlatTop	83.78
2020-08-21	Aug	34	Fall Kite Event	In Store Sales	Sunshine	398.41
2020-07-08	Jul	28	None	Web Site Sales	Bellen	88.12
2020-06-13	Jun	24	Festival of Flight	In Store Sales	Bellen	46.64
2020-07-18	Jul	29	None	In Store Sales	Aspen	60.57
2020-08-27	Aug	35	Fall Kite Event	E-mail Coupon	Carlota	22.97
2020-06-11	Jun	24	Festival of Flight	Web Site Sales	Sunshine	133.43
2020-08-07	Aug	32	Fall Kite Event	E-mail Coupon	Sunshine	20.77
2020-08-31	Aug	36	None	In Store Sales	Quad	33.91
2020-07-13	Jul	29	None	Web Site Sales	Quad	96.68
2020-08-11	Aug	33	Fall Kite Event	In Store Sales	Majectic Beaut	58.23
2020-08-17	Aug	34	Fall Kite Event	In Store Sales	V-Rang	36.07
2020-06-02	Jun	23	Festival of Flight	Web Site Sales	Sunshine	324.43
2020-06-07	Jun	24	Festival of Flight	In Store Sales	Doublers	312.2
2020-05-19	May	21	None	In Store Sales	Carlota	44.81
2020-08-26	Aug	35	Fall Kite Event	In Store Sales	Bellen	22.71
2020-06-13	Jun	24	Festival of Flight	Web Site Sales	Sunbell	25.65
2020-05-12	May	20	None	In Store Sales	Quad	68.12
2020-06-09	Jun	24	Festival of Flight	Web Site Sales	Quad	33.91
2020-09-16	Sep	38	None	E-mail Coupon	Sunbell	48.56
2020-08-23	Aug	35	Fall Kite Event	In Store Sales	Quad	33.31
2020-06-08	Jun	24	Festival of Flight	In Store Sales	Aspen	40.55
2020-08-13	Aug	33	Fall Kite Event	In Store Sales	Aspen	180.99
2020-09-16	Sep	38	None	In Store Sales	Bellen	46.96
2020-08-18	Aug	34	Fall Kite Event	In Store Sales	Sunbell	72.2
2020-09-01	Sep	36	None	In Store Sales	Crested Beaut	25.98
2020-06-29	Jun	27	None	E-mail Coupon	Sunset	71.83
2020-06-17	Jun	25	Festival of Flight	Web Site Sales	Sunbell	72.12
2020-07-15	Jul	29	None	Web Site Sales	Doublers	160.36
2020-07-20	Jul	30	None	E-mail Coupon	Crested Beaut	72.63
2020-06-21	Jun	26	Festival of Flight	Web Site Sales	Sunshine	20.15
2020-08-01	Aug	31	None	Web Site Sales	Crested Beaut	25.32
2020-06-01	Jun	23	Festival of Flight	E-mail Coupon	Carlota	46.04
2020-08-15	Aug	33	Fall Kite Event	E-mail Coupon	Sunset	24
2020-06-11	Jun	24	Festival of Flight	In Store Sales	Sunshine	341.53
2020-06-22	Jun	26	Festival of Flight	Web Site Sales	Sunshine	20.79
2020-06-24	Jun	26	Festival of Flight	In Store Sales	Aspen	319.83
2020-06-22	Jun	26	Festival of Flight	In Store Sales	Quad	33.42
2020-06-23	Jun	26	Festival of Flight	In Store Sales	Carlota	46.2
2020-06-15	Jun	25	Festival of Flight	Web Site Sales	Quad	99.72
2020-06-02	Jun	23	Festival of Flight	In Store Sales	Carlota	46.08
2020-08-28	Aug	35	Fall Kite Event	In Store Sales	Sunbell	50.74
2020-06-29	Jun	27	None	In Store Sales	Sunshine	80.91
2020-08-21	Aug	34	Fall Kite Event	Web Site Sales	Carlota	69.49
2020-08-25	Aug	35	Fall Kite Event	In Store Sales	Carlota	501.98
2020-06-13	Jun	24	Festival of Flight	Web Site Sales	Sunbell	75.58
2020-08-09	Aug	33	Fall Kite Event	In Store Sales	Sunshine	20.76
2020-08-18	Aug	34	Fall Kite Event	Web Site Sales	Sunset	47.63
2020-08-18	Aug	34	Fall Kite Event	In Store Sales	Sunbell	72.35
2020-08-12	Aug	33	Fall Kite Event	Web Site Sales	Sunset	24.48
2020-06-14	Jun	25	Festival of Flight	Web Site Sales	Carlota	69.56
2020-08-18	Aug	34	Fall Kite Event	In Store Sales	Majectic Beaut	30.02
2020-06-02	Jun	23	Festival of Flight	Web Site Sales	Quad	272.19
2020-08-18	Aug	34	Fall Kite Event	Web Site Sales	Quad	33.22
2020-08-20	Aug	34	Fall Kite Event	In Store Sales	Sunbell	75.99
2020-06-18	Jun	25	Festival of Flight	E-mail Coupon	Sunset	71.26
2020-06-12	Jun	24	Festival of Flight	Web Site Sales	Bellen	46.42
2020-06-22	Jun	26	Festival of Flight	In Store Sales	Quad	34.99
2020-08-09	Aug	33	Fall Kite Event	In Store Sales	V-Rang	38.9
2020-06-19	Jun	25	Festival of Flight	Web Site Sales	Aspen	40.29
2020-06-02	Jun	23	Festival of Flight	Web Site Sales	Sunset	24.8
2020-08-01	Aug	31	None	In Store Sales	Sunbell	415.94
2020-08-06	Aug	32	Fall Kite Event	In Store Sales	Majectic Beaut	28.44
2020-06-04	Jun	23	Festival of Flight	In Store Sales	Bellen	46.69
2020-08-19	Aug	34	Fall Kite Event	In Store Sales	Sunbell	25.73
2020-06-04	Jun	23	Festival of Flight	Web Site Sales	Sunbell	48.45
2020-06-04	Jun	23	Festival of Flight	E-mail Coupon	Sunshine	38.01
2020-06-09	Jun	24	Festival of Flight	Web Site Sales	Carlota	46.92
2020-06-04	Jun	23	Festival of Flight	Web Site Sales	FlatTop	55.24
2020-05-03	May	19	None	In Store Sales	Majectic Beaut	60.46
2020-08-21	Aug	34	Fall Kite Event	In Store Sales	Bellen	23.86
2020-08-10	Aug	33	Fall Kite Event	In Store Sales	Bellen	46.98
2020-07-20	Jul	30	None	Web Site Sales	Quad	64.6
2020-08-21	Aug	34	Fall Kite Event	Web Site Sales	Aspen	40.39
2020-08-22	Aug	34	Fall Kite Event	In Store Sales	Quad	132.84
2020-08-09	Aug	33	Fall Kite Event	Web Site Sales	Sunset	23.43
2020-06-04	Jun	23	Festival of Flight	Web Site Sales	Quad	102.39
2020-08-28	Aug	35	Fall Kite Event	In Store Sales	Quad	33.28
2020-06-28	Jun	27	None	In Store Sales	Doublers	160.41
2020-06-11	Jun	24	Festival of Flight	In Store Sales	Sunshine	20.44
2020-06-28	Jun	27	None	Web Site Sales	Quad	68.74
2020-06-01	Jun	23	Festival of Flight	In Store Sales	Sunbell	75.5
2020-06-09	Jun	24	Festival of Flight	Web Site Sales	FlatTop	28.21
2020-08-09	Aug	33	Fall Kite Event	E-mail Coupon	Quad	102.96
2020-08-09	Aug	33	Fall Kite Event	In Store Sales	Sunshine	40.02
2020-06-17	Jun	25	Festival of Flight	In Store Sales	Bellen	69.61
2020-05-26	May	22	None	Web Site Sales	Carlota	92.89
2020-06-03	Jun	23	Festival of Flight	E-mail Coupon	Sunshine	40.26
2020-08-14	Aug	33	Fall Kite Event	In Store Sales	Aspen	40.96
2020-06-02	Jun	23	Festival of Flight	Web Site Sales	Sunbell	72.8
2020-08-24	Aug	35	Fall Kite Event	In Store Sales	Bellen	283.85
2020-05-05	May	19	None	Web Site Sales	Aspen	20.98
2020-06-25	Jun	26	Festival of Flight	In Store Sales	Quad	99.44
2020-06-07	Jun	24	Festival of Flight	Web Site Sales	Bellen	23.76
2020-08-29	Aug	35	Fall Kite Event	E-mail Coupon	Bellen	66.69
2020-07-31	Jul	31	None	Web Site Sales	Sunset	469.93
2020-06-30	Jun	27	None	Web Site Sales	Bellen	327.75
2020-08-27	Aug	35	Fall Kite Event	Web Site Sales	Bellen	46.38
2020-08-15	Aug	33	Fall Kite Event	In Store Sales	Sunbell	25.02
2020-06-13	Jun	24	Festival of Flight	Web Site Sales	Bellen	262.81
2020-08-23	Aug	35	Fall Kite Event	In Store Sales	Bellen	46.27
2020-05-08	May	19	None	In Store Sales	Sunset	23.24
2020-06-25	Jun	26	Festival of Flight	Web Site Sales	Carlota	46.08
2020-08-27	Aug	35	Fall Kite Event	E-mail Coupon	Quad	102.02
2020-06-20	Jun	25	Festival of Flight	Web Site Sales	Carlota	23.72
2020-06-22	Jun	26	Festival of Flight	Web Site Sales	Bellen	46.37
2020-08-19	Aug	34	Fall Kite Event	In Store Sales	Carlota	46.76
2020-06-14	Jun	25	Festival of Flight	In Store Sales	Sunset	71.87
2020-08-27	Aug	35	Fall Kite Event	In Store Sales	Sunbell	72.51
2020-06-02	Jun	23	Festival of Flight	Web Site Sales	Sunshine	20.45
2020-05-29	May	22	None	In Store Sales	Majectic Beaut	87.03
2020-07-03	Jul	27	None	Web Site Sales	Majectic Beaut	29.32
2020-08-11	Aug	33	Fall Kite Event	In Store Sales	Sunshine	19.4
2020-06-29	Jun	27	None	Web Site Sales	Carlota	69.73
2020-06-16	Jun	25	Festival of Flight	Web Site Sales	FlatTop	80.01
2020-06-24	Jun	26	Festival of Flight	E-mail Coupon	Crested Beaut	46.23
2020-08-05	Aug	32	Fall Kite Event	In Store Sales	Sunshine	40.41
2020-08-27	Aug	35	Fall Kite Event	In Store Sales	Sunshine	40.3
2020-08-30	Aug	36	None	In Store Sales	Sunset	94.64
2020-06-15	Jun	25	Festival of Flight	In Store Sales	Sunset	68.8
2020-08-03	Aug	32	Fall Kite Event	In Store Sales	Bellen	414.19
2020-06-23	Jun	26	Festival of Flight	In Store Sales	Quad	64.96
2020-06-09	Jun	24	Festival of Flight	In Store Sales	Majectic Beaut	60.08
2020-06-25	Jun	26	Festival of Flight	Web Site Sales	Sunbell	96.57
2020-08-30	Aug	36	None	In Store Sales	Bellen	480.04
2020-07-22	Jul	30	None	In Store Sales	Sunset	47.34
2020-05-30	May	22	None	In Store Sales	Sunshine	60.52
2020-05-25	May	22	None	Web Site Sales	FlatTop	83.73
2020-06-04	Jun	23	Festival of Flight	In Store Sales	Bellen	23.96
2020-08-03	Aug	32	Fall Kite Event	In Store Sales	Sunset	45.47
2020-06-23	Jun	26	Festival of Flight	Web Site Sales	Quad	99.9
2020-08-15	Aug	33	Fall Kite Event	Web Site Sales	Majectic Beaut	58.08
2020-08-25	Aug	35	Fall Kite Event	In Store Sales	Crested Beaut	92.98
2020-05-24	May	22	None	Web Site Sales	Aspen	40.12
2020-06-03	Jun	23	Festival of Flight	E-mail Coupon	Sunset	71.85
2020-05-29	May	22	None	Web Site Sales	Aspen	40.13
2020-06-18	Jun	25	Festival of Flight	In Store Sales	Crested Beaut	72.27
2020-08-15	Aug	33	Fall Kite Event	Web Site Sales	Majectic Beaut	87.88
2020-06-02	Jun	23	Festival of Flight	In Store Sales	Majectic Beaut	56.63
2020-08-04	Aug	32	Fall Kite Event	Web Site Sales	Quad	69
2020-08-13	Aug	33	Fall Kite Event	In Store Sales	Carlota	46.63
2020-06-23	Jun	26	Festival of Flight	E-mail Coupon	Sunbell	50.15
2020-05-27	May	22	None	E-mail Coupon	Quad	690.75
2020-09-20	Sep	39	None	E-mail Coupon	Quad	33.57
2020-08-26	Aug	35	Fall Kite Event	In Store Sales	Majectic Beaut	87.35
2020-09-17	Sep	38	None	Web Site Sales	Sunbell	24.6
2020-07-10	Jul	28	None	In Store Sales	Carlota	69.27
2020-06-23	Jun	26	Festival of Flight	Web Site Sales	Majectic Beaut	30.84
2020-09-01	Sep	36	None	Web Site Sales	Carlota	44.48
2020-06-04	Jun	23	Festival of Flight	Web Site Sales	Majectic Beaut	58.59
2020-08-06	Aug	32	Fall Kite Event	In Store Sales	Sunshine	40.05
2020-08-07	Aug	32	Fall Kite Event	Web Site Sales	Quad	66.22
2020-08-14	Aug	33	Fall Kite Event	In Store Sales	Quad	33.32
2020-08-09	Aug	33	Fall Kite Event	In Store Sales	Crested Beaut	25.17
2020-08-09	Aug	33	Fall Kite Event	In Store Sales	Quad	33.95
2020-08-26	Aug	35	Fall Kite Event	Web Site Sales	Sunshine	284
2020-08-30	Aug	36	None	In Store Sales	Sunbell	48.02
2020-08-31	Aug	36	None	Web Site Sales	Carlota	46.97
2020-08-07	Aug	32	Fall Kite Event	In Store Sales	Aspen	42.99
2020-07-18	Jul	29	None	In Store Sales	Sunbell	23.58
2020-06-20	Jun	25	Festival of Flight	In Store Sales	Bellen	46.4
2020-06-13	Jun	24	Festival of Flight	E-mail Coupon	Quad	68.34
2020-06-20	Jun	25	Festival of Flight	Web Site Sales	Sunshine	60.07
2020-05-11	May	20	None	Web Site Sales	Sunset	71.83
2020-06-02	Jun	23	Festival of Flight	Web Site Sales	Doublers	240.1
2020-06-11	Jun	24	Festival of Flight	In Store Sales	Carlota	22.44
2020-09-04	Sep	36	None	Web Site Sales	Aspen	42.15
2020-06-23	Jun	26	Festival of Flight	In Store Sales	Sunbell	72.52
2020-05-03	May	19	None	In Store Sales	Quad	68.26
2020-06-23	Jun	26	Festival of Flight	In Store Sales	Quad	32.01
2020-05-02	May	18	None	In Store Sales	V-Rang	72.31
2020-09-03	Sep	36	None	Web Site Sales	Quad	470.77
2020-08-07	Aug	32	Fall Kite Event	In Store Sales	Aspen	57.24
2020-07-22	Jul	30	None	Web Site Sales	Quad	66.71
2020-06-08	Jun	24	Festival of Flight	In Store Sales	Bellen	69.79
2020-09-13	Sep	38	None	Web Site Sales	V-Rang	38.29
2020-08-09	Aug	33	Fall Kite Event	In Store Sales	Sunset	47.93
2020-06-22	Jun	26	Festival of Flight	Web Site Sales	Sunset	24.43
2020-08-13	Aug	33	Fall Kite Event	In Store Sales	Carlota	92.76
2020-07-23	Jul	30	None	Web Site Sales	Aspen	63.13
2020-08-30	Aug	36	None	In Store Sales	Carlota	69.24
2020-06-29	Jun	27	None	Web Site Sales	Doublers	80.29
2020-08-30	Aug	36	None	In Store Sales	Bellen	46.12
2020-08-01	Aug	31	None	In Store Sales	Bellen	69.86
2020-06-12	Jun	24	Festival of Flight	In Store Sales	Bellen	23.11
2020-06-08	Jun	24	Festival of Flight	E-mail Coupon	Bellen	46.45
2020-08-05	Aug	32	Fall Kite Event	In Store Sales	Quad	132.67
2020-08-01	Aug	31	None	E-mail Coupon	V-Rang	18.21
2020-08-14	Aug	33	Fall Kite Event	In Store Sales	FlatTop	27.74
2020-06-27	Jun	26	Festival of Flight	Web Site Sales	Aspen	63
2020-06-01	Jun	23	Festival of Flight	In Store Sales	Sunshine	60.92
2020-08-27	Aug	35	Fall Kite Event	In Store Sales	Majectic Beaut	56.24
2020-07-14	Jul	29	None	Web Site Sales	Quad	33.38
2020-06-05	Jun	23	Festival of Flight	Web Site Sales	Sunset	90.6
2020-06-23	Jun	26	Festival of Flight	Web Site Sales	Majectic Beaut	60.79
2020-09-22	Sep	39	None	Web Site Sales	Sunshine	60.2
2020-06-11	Jun	24	Festival of Flight	E-mail Coupon	Carlota	23.66
2020-08-25	Aug	35	Fall Kite Event	In Store Sales	Crested Beaut	24.72
2020-06-22	Jun	26	Festival of Flight	In Store Sales	Crested Beaut	100.47
2020-06-11	Jun	24	Festival of Flight	In Store Sales	Sunset	47.49
2020-08-24	Aug	35	Fall Kite Event	E-mail Coupon	Sunbell	75.48
2020-08-02	Aug	32	Fall Kite Event	In Store Sales	Carlota	46.06
2020-06-30	Jun	27	None	Web Site Sales	Carlota	414.39
2020-06-04	Jun	23	Festival of Flight	In Store Sales	Majectic Beaut	29.66
2020-06-24	Jun	26	Festival of Flight	Web Site Sales	FlatTop	28.53
2020-08-17	Aug	34	Fall Kite Event	In Store Sales	Sunshine	19.03
2020-08-24	Aug	35	Fall Kite Event	In Store Sales	Quad	33.65
2020-06-02	Jun	23	Festival of Flight	Web Site Sales	Quad	136.55
2020-06-12	Jun	24	Festival of Flight	Web Site Sales	Sunshine	38.06
2020-08-18	Aug	34	Fall Kite Event	In Store Sales	Sunbell	72.52
2020-08-28	Aug	35	Fall Kite Event	In Store Sales	Sunbell	48.48
2020-07-17	Jul	29	None	In Store Sales	Crested Beaut	25.29
2020-09-20	Sep	39	None	In Store Sales	Doublers	80.05
2020-06-18	Jun	25	Festival of Flight	Web Site Sales	Quad	66.28
2020-06-27	Jun	26	Festival of Flight	In Store Sales	Sunset	68.69
2020-06-29	Jun	27	None	Web Site Sales	Doublers	560.79
2020-08-17	Aug	34	Fall Kite Event	E-mail Coupon	Carlota	23.09
2020-09-11	Sep	37	None	In Store Sales	Quad	64.71
2020-06-09	Jun	24	Festival of Flight	E-mail Coupon	Carlota	46.35
2020-06-16	Jun	25	Festival of Flight	In Store Sales	Bellen	46.98
2020-06-27	Jun	26	Festival of Flight	In Store Sales	Majectic Beaut	87.02
2020-06-09	Jun	24	Festival of Flight	Web Site Sales	Crested Beaut	75.1
2020-08-05	Aug	32	Fall Kite Event	In Store Sales	Aspen	40.62
2020-06-17	Jun	25	Festival of Flight	Web Site Sales	Quad	99.85
2020-06-22	Jun	26	Festival of Flight	Web Site Sales	Sunset	225.97
2020-08-21	Aug	34	Fall Kite Event	Web Site Sales	Bellen	46.73
2020-06-15	Jun	25	Festival of Flight	In Store Sales	V-Rang	57.16
2020-06-25	Jun	26	Festival of Flight	Web Site Sales	Majectic Beaut	84.71
2020-06-21	Jun	26	Festival of Flight	In Store Sales	Bellen	69.1
2020-08-23	Aug	35	Fall Kite Event	Web Site Sales	FlatTop	80.28
2020-06-24	Jun	26	Festival of Flight	In Store Sales	Carlota	23.35
2020-08-18	Aug	34	Fall Kite Event	E-mail Coupon	Bellen	69.05
2020-08-14	Aug	33	Fall Kite Event	In Store Sales	Majectic Beaut	90.02
2020-08-12	Aug	33	Fall Kite Event	Web Site Sales	Carlota	46.1
2020-08-04	Aug	32	Fall Kite Event	In Store Sales	Sunshine	40.34
2020-09-17	Sep	38	None	Web Site Sales	Bellen	69.17
2020-06-27	Jun	26	Festival of Flight	In Store Sales	V-Rang	18.64
2020-08-29	Aug	35	Fall Kite Event	Web Site Sales	Bellen	46.96
2020-08-14	Aug	33	Fall Kite Event	In Store Sales	Sunshine	40.7
2020-06-14	Jun	25	Festival of Flight	Web Site Sales	Sunshine	40.7
2020-07-14	Jul	29	None	Web Site Sales	Quad	102.43
2020-09-08	Sep	37	None	In Store Sales	V-Rang	54.38
2020-08-06	Aug	32	Fall Kite Event	In Store Sales	Quad	34.82
2020-06-16	Jun	25	Festival of Flight	Web Site Sales	Sunset	47.03
2020-08-04	Aug	32	Fall Kite Event	In Store Sales	Sunshine	38.76
2020-07-04	Jul	27	None	In Store Sales	Quad	68.01
2020-08-27	Aug	35	Fall Kite Event	In Store Sales	Crested Beaut	50.33
2020-08-23	Aug	35	Fall Kite Event	E-mail Coupon	Quad	132.98
2020-06-29	Jun	27	None	Web Site Sales	Bellen	46.1
2020-06-10	Jun	24	Festival of Flight	Web Site Sales	Quad	66.93
2020-06-06	Jun	23	Festival of Flight	In Store Sales	V-Rang	54.87
2020-06-06	Jun	23	Festival of Flight	In Store Sales	Sunbell	25.43
2020-06-28	Jun	27	None	Web Site Sales	Sunbell	69.27
2020-06-23	Jun	26	Festival of Flight	In Store Sales	Bellen	23.82
2020-08-23	Aug	35	Fall Kite Event	In Store Sales	Quad	102.75
2020-08-23	Aug	35	Fall Kite Event	Web Site Sales	Quad	34.23
2020-06-04	Jun	23	Festival of Flight	Web Site Sales	Sunbell	75.91
2020-06-26	Jun	26	Festival of Flight	E-mail Coupon	Sunbell	46.15
2020-06-27	Jun	26	Festival of Flight	Web Site Sales	Quad	96.52
2020-06-28	Jun	27	None	Web Site Sales	Sunshine	38.51
2020-07-06	Jul	28	None	Web Site Sales	Sunshine	60.2
2020-08-30	Aug	36	None	In Store Sales	Bellen	23.8
2020-07-23	Jul	30	None	Web Site Sales	Majectic Beaut	87.02
2020-08-08	Aug	32	Fall Kite Event	Web Site Sales	Carlota	69.62
2020-05-05	May	19	None	In Store Sales	Majectic Beaut	116.21
2020-06-12	Jun	24	Festival of Flight	E-mail Coupon	Quad	68.21
2020-06-03	Jun	23	Festival of Flight	Web Site Sales	Bellen	46.23
2020-06-07	Jun	24	Festival of Flight	In Store Sales	FlatTop	53.94
2020-06-21	Jun	26	Festival of Flight	Web Site Sales	Sunshine	60.66
2020-06-02	Jun	23	Festival of Flight	Web Site Sales	Bellen	69.9
2020-06-19	Jun	25	Festival of Flight	Web Site Sales	Sunbell	50.75
2020-06-04	Jun	23	Festival of Flight	In Store Sales	Quad	99.3
2020-08-11	Aug	33	Fall Kite Event	In Store Sales	Carlota	69.71
2020-06-24	Jun	26	Festival of Flight	Web Site Sales	Sunbell	72.2
2020-06-09	Jun	24	Festival of Flight	Web Site Sales	Quad	102.32
2020-06-09	Jun	24	Festival of Flight	In Store Sales	Crested Beaut	46.4
2020-06-27	Jun	26	Festival of Flight	In Store Sales	Sunbell	46.25
2020-08-07	Aug	32	Fall Kite Event	E-mail Coupon	Quad	533.23
2020-06-05	Jun	23	Festival of Flight	Web Site Sales	Quad	102.77
2020-06-28	Jun	27	None	E-mail Coupon	Carlota	44.96
2020-06-07	Jun	24	Festival of Flight	Web Site Sales	Aspen	42.5
2020-08-05	Aug	32	Fall Kite Event	Web Site Sales	Carlota	22.7
2020-08-15	Aug	33	Fall Kite Event	In Store Sales	Bellen	501.12
2020-06-04	Jun	23	Festival of Flight	In Store Sales	Bellen	458.34
2020-08-04	Aug	32	Fall Kite Event	In Store Sales	Sunbell	25.66
2020-09-08	Sep	37	None	Web Site Sales	Sunbell	24.7
2020-08-02	Aug	32	Fall Kite Event	In Store Sales	Carlota	23.27
2020-06-01	Jun	23	Festival of Flight	In Store Sales	Quad	64.07
2020-06-21	Jun	26	Festival of Flight	In Store Sales	Quad	66.5
2020-06-22	Jun	26	Festival of Flight	In Store Sales	Quad	66.82
2020-09-26	Sep	39	None	In Store Sales	Crested Beaut	75.4
2020-08-25	Aug	35	Fall Kite Event	E-mail Coupon	Carlota	23.43
2020-08-20	Aug	34	Fall Kite Event	In Store Sales	Sunset	71.92
2020-07-31	Jul	31	None	In Store Sales	Sunset	45.1
2020-08-08	Aug	32	Fall Kite Event	E-mail Coupon	Carlota	88.83
2020-09-09	Sep	37	None	Web Site Sales	Quad	132.11
2020-08-15	Aug	33	Fall Kite Event	In Store Sales	Bellen	23.08
2020-09-16	Sep	38	None	In Store Sales	Sunbell	23.16
2020-08-18	Aug	34	Fall Kite Event	In Store Sales	V-Rang	77
2020-08-17	Aug	34	Fall Kite Event	In Store Sales	Carlota	69.24
2020-08-27	Aug	35	Fall Kite Event	In Store Sales	Crested Beaut	24.88
2020-06-19	Jun	25	Festival of Flight	Web Site Sales	Bellen	92.03
2020-08-19	Aug	34	Fall Kite Event	E-mail Coupon	Quad	66.58
2020-06-24	Jun	26	Festival of Flight	Web Site Sales	Carlota	92.05
2020-08-04	Aug	32	Fall Kite Event	In Store Sales	Majectic Beaut	87.39
2020-08-08	Aug	32	Fall Kite Event	Web Site Sales	Quad	66.68
2020-08-20	Aug	34	Fall Kite Event	E-mail Coupon	Carlota	46.56
2020-06-19	Jun	25	Festival of Flight	In Store Sales	V-Rang	54.93
2020-08-05	Aug	32	Fall Kite Event	In Store Sales	Carlota	69.95
2020-08-02	Aug	32	Fall Kite Event	Web Site Sales	Crested Beaut	72.17
2020-06-02	Jun	23	Festival of Flight	E-mail Coupon	Crested Beaut	46.11
2020-08-27	Aug	35	Fall Kite Event	Web Site Sales	Quad	102.25
2020-06-04	Jun	23	Festival of Flight	Web Site Sales	Sunshine	60.12
2020-06-25	Jun	26	Festival of Flight	E-mail Coupon	Quad	66.65
2020-08-29	Aug	35	Fall Kite Event	In Store Sales	Quad	96.89
2020-08-17	Aug	34	Fall Kite Event	In Store Sales	Majectic Beaut	58.86
2020-09-11	Sep	37	None	Web Site Sales	Quad	64.95
2020-07-01	Jul	27	None	In Store Sales	Aspen	21.99
2020-06-01	Jun	23	Festival of Flight	Web Site Sales	Carlota	69.42
2020-08-15	Aug	33	Fall Kite Event	Web Site Sales	Sunset	45.47
2020-06-08	Jun	24	Festival of Flight	Web Site Sales	Aspen	60.53
2020-06-29	Jun	27	None	E-mail Coupon	Sunset	47.91
2020-08-21	Aug	34	Fall Kite Event	In Store Sales	Aspen	42.12
2020-06-14	Jun	25	Festival of Flight	In Store Sales	Bellen	66.71
2020-06-16	Jun	25	Festival of Flight	In Store Sales	Bellen	23.54
2020-08-25	Aug	35	Fall Kite Event	Web Site Sales	Sunbell	48.62
2020-09-19	Sep	38	None	Web Site Sales	Sunset	335.54
2020-09-07	Sep	37	None	In Store Sales	Sunshine	60.98
2020-08-01	Aug	31	None	In Store Sales	Crested Beaut	50.06
2020-06-24	Jun	26	Festival of Flight	Web Site Sales	Carlota	69.79
2020-06-30	Jun	27	None	Web Site Sales	Crested Beaut	72.46
2020-07-15	Jul	29	None	Web Site Sales	Sunshine	20.22
2020-06-22	Jun	26	Festival of Flight	Web Site Sales	Sunshine	200.6
2020-08-15	Aug	33	Fall Kite Event	Web Site Sales	Crested Beaut	75.21
2020-05-20	May	21	None	Web Site Sales	Carlota	523.05
2020-06-21	Jun	26	Festival of Flight	E-mail Coupon	Sunshine	40.67
2020-08-07	Aug	32	Fall Kite Event	In Store Sales	Bellen	22.7
2020-06-01	Jun	23	Festival of Flight	In Store Sales	Sunbell	96.37
2020-06-29	Jun	27	None	In Store Sales	Carlota	44.37
2020-08-12	Aug	33	Fall Kite Event	Web Site Sales	FlatTop	83.67
2020-08-25	Aug	35	Fall Kite Event	In Store Sales	Bellen	46.13
2020-08-24	Aug	35	Fall Kite Event	Web Site Sales	Sunbell	48.38
2020-08-12	Aug	33	Fall Kite Event	In Store Sales	Sunset	24.64
2020-08-19	Aug	34	Fall Kite Event	Web Site Sales	Sunshine	20.63
2020-07-03	Jul	27	None	In Store Sales	FlatTop	53.15
2020-08-24	Aug	35	Fall Kite Event	E-mail Coupon	Crested Beaut	24.92
2020-08-27	Aug	35	Fall Kite Event	In Store Sales	Sunshine	60.52
2020-08-04	Aug	32	Fall Kite Event	Web Site Sales	Carlota	23.69
2020-08-01	Aug	31	None	In Store Sales	Crested Beaut	46.73
2020-08-25	Aug	35	Fall Kite Event	Web Site Sales	Crested Beaut	24.17
2020-08-16	Aug	34	Fall Kite Event	In Store Sales	Sunshine	40.9
2020-09-02	Sep	36	None	In Store Sales	V-Rang	36.74
2020-08-07	Aug	32	Fall Kite Event	In Store Sales	Bellen	46.13
2020-06-29	Jun	27	None	E-mail Coupon	Crested Beaut	48.61
2020-06-24	Jun	26	Festival of Flight	In Store Sales	Sunshine	20.59
2020-08-01	Aug	31	None	Web Site Sales	Bellen	66.54
2020-08-02	Aug	32	Fall Kite Event	In Store Sales	Sunset	68.37
2020-06-05	Jun	23	Festival of Flight	In Store Sales	V-Rang	54.7
2020-08-30	Aug	36	None	In Store Sales	Quad	66.97
2020-06-15	Jun	25	Festival of Flight	Web Site Sales	Aspen	63.42
2020-05-18	May	21	None	Web Site Sales	Sunshine	20.91
2020-08-07	Aug	32	Fall Kite Event	E-mail Coupon	Sunset	24.21
2020-08-04	Aug	32	Fall Kite Event	In Store Sales	Aspen	84.38
2020-07-08	Jul	28	None	In Store Sales	Sunset	47.94
2020-05-25	May	22	None	Web Site Sales	Majectic Beaut	87.2
2020-05-13	May	20	None	In Store Sales	Sunshine	40.75
2020-09-09	Sep	37	None	Web Site Sales	Sunshine	246.2
2020-06-15	Jun	25	Festival of Flight	Web Site Sales	Doublers	240.26
2020-08-25	Aug	35	Fall Kite Event	In Store Sales	Quad	99.9
2020-06-01	Jun	23	Festival of Flight	In Store Sales	Quad	68.92
2020-06-27	Jun	26	Festival of Flight	Web Site Sales	Crested Beaut	73
2020-08-29	Aug	35	Fall Kite Event	Web Site Sales	Sunshine	40.34
2020-06-23	Jun	26	Festival of Flight	In Store Sales	Sunset	71.72
2020-06-10	Jun	24	Festival of Flight	Web Site Sales	Sunset	71.67
2020-05-25	May	22	None	In Store Sales	Carlota	46.43
2020-07-26	Jul	31	None	Web Site Sales	Bellen	69.84
2020-06-25	Jun	26	Festival of Flight	Web Site Sales	Carlota	69.4
2020-08-03	Aug	32	Fall Kite Event	Web Site Sales	Quad	66.34
2020-06-04	Jun	23	Festival of Flight	E-mail Coupon	Quad	68.95
2020-06-28	Jun	27	None	In Store Sales	Sunshine	38.36
2020-08-10	Aug	33	Fall Kite Event	In Store Sales	Bellen	23.91
2020-07-08	Jul	28	None	Web Site Sales	Majectic Beaut	58.61
2020-06-08	Jun	24	Festival of Flight	Web Site Sales	Majectic Beaut	87.15
2020-05-01	May	18	None	Web Site Sales	FlatTop	83.4
2020-08-29	Aug	35	Fall Kite Event	In Store Sales	Majectic Beaut	331.02
2020-08-28	Aug	35	Fall Kite Event	E-mail Coupon	Quad	96.6
2020-06-08	Jun	24	Festival of Flight	E-mail Coupon	Majectic Beaut	58.37
2020-06-20	Jun	25	Festival of Flight	Web Site Sales	Bellen	23.78
2020-06-28	Jun	27	None	Web Site Sales	FlatTop	277.32
2020-06-18	Jun	25	Festival of Flight	Web Site Sales	Quad	33.33
2020-06-14	Jun	25	Festival of Flight	Web Site Sales	Sunbell	24.9
2020-08-22	Aug	34	Fall Kite Event	Web Site Sales	Bellen	66.78
2020-06-13	Jun	24	Festival of Flight	Web Site Sales	FlatTop	27.75
2020-06-04	Jun	23	Festival of Flight	Web Site Sales	Bellen	23.48
2020-06-13	Jun	24	Festival of Flight	Web Site Sales	Majectic Beaut	28.71
2020-08-30	Aug	36	None	Web Site Sales	Sunshine	60.09
2020-09-18	Sep	38	None	In Store Sales	Crested Beaut	75.36
2020-08-18	Aug	34	Fall Kite Event	E-mail Coupon	Doublers	78.58
2020-08-29	Aug	35	Fall Kite Event	In Store Sales	FlatTop	83.37
2020-06-02	Jun	23	Festival of Flight	Web Site Sales	Quad	136.15
2020-07-24	Jul	30	None	Web Site Sales	Majectic Beaut	29.8
2020-08-18	Aug	34	Fall Kite Event	Web Site Sales	Sunshine	38.01
2020-06-29	Jun	27	None	Web Site Sales	Bellen	46.46
[truncated: 1 more rows]

## Sheet: 1
Summer Sales ($)
Row Labels	Sum of Revenue
Aspen	7377.44
Bellen	17410.5
Carlota	21195.4
Crested Beaut	8107.09
Doublers	16005.6
FlatTop	7817.89
Majectic Beaut	14919.1
Quad	37490.8
Sunbell	15076.9
Sunset	12730.8
Sunshine	16349.8
V-Rang	3357.85
Grand Total	177839

## Sheet: 2
Summer Sales ($)
Row Labels	Sum of Revenue
18	430.5
19	4898.6
20	3963.91
21	6403.15
22	5784.61
23	10912
24	13436.8
25	12876.1
26	12208.4
27	12014.3
28	4623.15
29	4147.28
30	6479.2
31	8529.48
32	11211
33	10777.5
34	12065.7
35	12136.5
36	7277.61
37	5903.45
38	5821.6
39	4949.93
40	988.25
Grand Total	177839

## Sheet: 3
Summer sales ($)
Sum of Revenue	Column Labels
Row Labels	E-mail Coupon	In Store Sales	Web Site Sales	Grand Total
May	3291.34	6250.64	12079.5	21621.5
Jun	5360.13	17458.7	35564.2	58383
Jul	1566.19	11409.5	10893.3	23868.9
Aug	5947.74	28897.1	17330.8	52175.7
Sep	1927.31	8035.99	11826.7	21790
Grand Total	18092.7	72052	87694.5	177839

## Sheet: 4
Summer sales ($)
Row Labels	Sum of Revenue
Fall Kite Event	46190.7
Festival of Flight	49433.4
None	82215
Grand Total	177839
