# Supplementary material
Source: ML conference proceedings conference paper supplement (https://openreview.net/forum?id=tfyr2zRVoK)
Supplement: supplementary_material [file ExpenseReport_Ans.xlsx]

## Sheet: 1
Date	Vendor/Client	Expense Account	Subtotal	Tax	Total
2019-12-21	Client A	Gas	313	40.69	353.69
2019-12-21	Client A	Meals	134	17.42	151.42
2019-12-25	Company A	Car Repairs	1205	156.65	1361.65
2019-12-26	Client B	Material Purchase	1629	211.77	1840.77
2019-12-27	Client B	Meals	1126	146.38	1272.38
2019-12-28	Client B	Car Repairs	1597	207.61	1804.61
2019-12-29	Client A	Reception	792	102.96	894.96
2019-12-30	Company B	Flight tickets	1018	132.34	1150.34
2019-12-31	Company A	Gas	263	34.19	297.19
2020-01-01	Client B	Meals	1697	220.61	1917.61
2020-01-02	Client B	Car Repairs	1954	254.02	2208.02
2020-01-03	Client B	Material Purchase	1681	218.53	1899.53
2020-01-04	Client B	Hiring	1019	132.47	1151.47
2020-01-05	Client A	Accommodation	157	20.41	177.41
2020-01-06	Company B	Reception	828	107.64	935.64
2020-01-07	Company A	Flight tickets	136	17.68	153.68
2020-01-08	Client A	Gas	127	16.51	143.51
2020-01-09	Company A	Meals	1529	198.77	1727.77
2020-01-10	Client B	Car Repairs	1755	228.15	1983.15
2020-01-11	Company B	Material Purchase	171	22.23	193.23
2020-01-12	Company A	Hiring	1325	172.25	1497.25
2020-01-13	Client A	Accommodation	1841	239.33	2080.33
2020-01-14	Client A	Meals	1285	167.05	1452.05
Total Expenses			23582	3065.66	26647.7
