# Supplementary material
Source: ML conference proceedings conference paper supplement (https://openreview.net/forum?id=tfyr2zRVoK)
Supplement: supplementary_material [file IncomeStatement_Ans.xlsx]

## Sheet: 1
Year	Net Sales	COGS	Gross Profit	Operating Expenses	Operating Profit	Tax Expense	Net Profit
2015	74000	29855	44145	37322	6823	1364.6	5458.4
2016	93948	49396	44552	44450	102	20.4	81.6
2017	86223	43511	42712	40498	2214	442.8	1771.2
2018	106125	61981	44144	43552	592	118.4	473.6
2019	107581	59573	48008	45691	2317	463.4	1853.6
2020	106239	59987	46252	42820	3432	686.4	2745.6
2021	114379	68154	46225	46076	149	29.8	119.2
2022	125242	79287	45955	38307	7648	1529.6	6118.4
