# Supplementary material
Source: ML conference proceedings conference paper supplement (https://openreview.net/forum?id=tfyr2zRVoK)
Supplement: supplementary_material [file MaturityDate_Ans.xlsx]

## Sheet: 1
Loan Issue Date	Length of Loan in Days	Maturity Date
2010-12-09	90	2011-03-09
2011-01-05	90	2011-04-05
2010-09-10	100	2010-12-19
2010-12-22	90	2011-03-22
2010-10-17	120	2011-02-14
2011-01-12	120	2011-05-12
2010-09-18	180	2011-03-17
2010-09-05	80	2010-11-24
2010-09-16	120	2011-01-14
