# Supplementary material
Source: ML conference proceedings conference paper supplement (https://openreview.net/forum?id=tfyr2zRVoK)
Supplement: supplementary_material [file NetIncome_Ans.xlsx]

## Sheet: 1
Revenue	Total Expenses	Net Income
39929	10828	29101
55389	14977	40412
52686	29650	23036
49490	28708	20782
38279	10990	27289
30002	22022	7980
56315	29700	26615
54870	23324	31546
39465	24834	14631
26176	24207	1969
32121	24773	7348
59875	25871	34004
42235	22797	19438
55101	29775	25326
35972	20109	15863
51922	12614	39308
42471	14555	27916
46706	16246	30460
58782	25706	33076
