# Supplementary material
Source: ML conference proceedings conference paper supplement (https://openreview.net/forum?id=tfyr2zRVoK)
Supplement: supplementary_material [file RampUpAndDown_Ans.xlsx]

## Sheet: 1
Hanging mass (kilograms)	Acceleration of Block up Ramp	Hanging mass (kilograms)	Acceleration of Block down Ramp
0.4	-2.24047	0	-5.19723
0.42	-2.03465	0.02	-4.8077
0.44	-1.83575	0.04	-4.43788
0.46	-1.64342	0.06	-4.08633
0.48	-1.45735	0.08	-3.75172
0.5	-1.27723	0.1	-3.43285
0.52	-1.10279	0.12	-3.12865
0.54	-0.933755	0.14	-2.83812
0.56	-0.769881	0.16	-2.56036
0.58	-0.610935	0.18	-2.29454
0.6	-0.456699	0.2	-2.03992
0.62	-0.306966	0.22	-1.7958
0.64	-0.161542	0.24	-1.56154
0.66	-0.0202437	0.26	-1.33656
0.68	0.117102	0.28	-1.12032
0.7	0.25066	0.3	-0.912311
0.72	0.380583	0.32	-0.71208
0.74	0.507018	0.34	-0.519198
0.76	0.630104	0.36	-0.333267
0.78	0.749972	0.38	-0.153917
0.8	0.866746	0.4	0.0191947
0.82	0.980546	0.42	0.186388
0.84	1.09148	0.44	0.347961
0.86	1.19966	0.46	0.504193
0.88	1.30519	0.48	0.655345
0.9	1.40816	0.5	0.801659
0.92	1.50866	0.52	0.943365
0.94	1.60678	0.54	1.08068
0.96	1.70261	0.56	1.2138
