# Supplementary material
Source: ML conference proceedings conference paper supplement (https://openreview.net/forum?id=tfyr2zRVoK)
Supplement: supplementary_material [file SalesRep_Ans.xlsx]

## Sheet: 1
Sales Rep	Jan	Feb	Mar	Apr	May	Jun	Total
Ivelisse Peel	696	420	722	428	279	349	2894
Sigrid Grooms	429	419	146	253	730	473	2450
Majorie Flaherty	563	325	197	229	664	275	2253
Stevie Fisk	710	287	209	485	459	498	2648
Nova Bolduc	767	283	624	149	156	460	2439
Naoma Moyer	220	282	390	714	563	783	2952
Eric Minter	231	735	416	378	368	353	2481
Dotty Dorn	229	496	519	309	616	405	2574
Kandice Hussey	752	773	483	220	597	175	3000
Cleo Nixon	255	567	237	692	245	472	2468
Total	4852	4587	3943	3857	4677	4243	26159
