# Supplementary material
Source: ML conference proceedings conference paper supplement (https://openreview.net/forum?id=tfyr2zRVoK)
Supplement: supplementary_material [file ShippingCosts_Ans.xlsx]

## Sheet: 1
Customers	Seattle	Milwaukee	Birmingham	Oakland	Min Distance	Shipping Center	Total Shipping Charge
Chandler	1447	1830	1686	766	766	Oakland	2382.26
Glendale	1405	1870	1715	744	744	Oakland	2313.84
Mesa	1440	1816	1702	758	758	Oakland	2357.38
Scottsdale	1435	1818	1706	754	754	Oakland	2344.94
Little Rock	2277	743	373	1955	373	Birmingham	1160.03
Antioch	796	2146	2299	36	36	Oakland	111.96
Berkeley	795	2165	2319	4	4	Oakland	75
Chula Vista	1258	2124	1996	499	499	Oakland	1551.89
Concord	785	2155	2319	25	25	Oakland	77.75
Daly City	813	2183	2329	21	21	Oakland	75
Fairfield	759	2129	2339	41	41	Oakland	127.51
Hayward	816	2186	2306	20	20	Oakland	75
Huntington Beach	1162	2063	2034	404	404	Oakland	1256.44
Long Beach	1156	2071	2042	398	398	Oakland	1237.78
Modesto	822	2158	2248	82	82	Oakland	255.02
Santa Clara	834	2204	2290	44	44	Oakland	136.84
Sunnyvale	835	2205	2293	44	44	Oakland	136.84
Thousand Oaks	1143	2092	2062	385	385	Oakland	1197.35
