# Supplementary material
Source: ML conference proceedings conference paper supplement (https://openreview.net/forum?id=tfyr2zRVoK)
Supplement: supplementary_material [file SimpleCompoundInterest.xlsx]

## Sheet: Sheet1
Year	Simple Interest	Compound Interest
