# Supplementary material
Source: ML conference proceedings conference paper supplement (https://openreview.net/forum?id=tfyr2zRVoK)
Supplement: supplementary_material [file SimpleCompoundInterest_Ans.xlsx]

## Sheet: 1
Year	Simple Interest	Compound Interest
1	110	110
2	120	121
3	130	133.1
4	140	146.41
5	150	161.051
6	160	177.156
7	170	194.872
8	180	214.359
9	190	235.795
10	200	259.374
11	210	285.312
12	220	313.843
13	230	345.227
14	240	379.75
15	250	417.725
16	260	459.497
17	270	505.447
18	280	555.992
19	290	611.591
20	300	672.75
