# Supplementary material
Source: ML conference proceedings conference paper supplement (https://openreview.net/forum?id=tfyr2zRVoK)
Supplement: supplementary_material [file SmallBalanceSheet_Ans.xlsx]

## Sheet: 1
Year	Current Assets	Fixed Assets	Other Assets	Assets	Current Liabilities	Long-term Liabilities	Owner's Equity	Liabilities & Owner's Equity
2014	185682	45500	3580	234762	6762	50000	172474	229236
2015	204527	43243	3520	251290	7653	50000	196318	253971
2016	219289	40840	3726	263855	8258	40000	220797	269055
2017	248718	38419	4011	291148	9133	40000	239576	288709
2018	264792	35854	4030	304676	9839	30000	253852	293691
2019	282148	33181	4088	319417	10585	30000	282688	323273
