# Supplementary material
Source: ML conference proceedings conference paper supplement (https://openreview.net/forum?id=tfyr2zRVoK)
Supplement: supplementary_material [file StockChange_Ans.xlsx]

## Sheet: 1
Stock	Value of Stock on Jan 1	Value of Stock on Dec 31	% Change
A	98	103.1	0.0520408
B	98.3702	95.5202	-0.0289722
C	100.098	99.3478	-0.00749267
D	95.9022	110.752	0.154845
E	98.1234	109.223	0.113123
F	95.532	95.232	-0.00314031
G	99.851	85.901	-0.139708
H	101.208	106.458	0.0518732
I	98.7404	97.3904	-0.0136722
J	95.9022	100.552	0.0484869
K	95.532	107.082	0.120902
L	96.2724	101.222	0.0514166
